# Supplementary material for: Unexpected polarization properties of sub-nanosized magnesium clusters
Source: Royal Society of Chemistry journal article supplement (doi:10.1039/d2ra08086a), 2023-01-01
Supplement: d2ra08086a1.pdf [file d2ra08086a1.pdf]

## Supplementary Material

### Unusual polarization properties of sub-nanosized magnesium clusters

Stanislav K. Ignatov, Artëm E. Masunov

#### Table of content:

| No. | Item                                                                                                                                                              | Pages  |
|-----|-------------------------------------------------------------------------------------------------------------------------------------------------------------------|--------|
| 1   | Figures S1-S3                                                                                                                                                     | 2-3    |
| 2   | Table S1. Energies and polarizabilities of 1237 isomers of Mg <sub>2</sub> -Mg <sub>32</sub> calculated at the DFT level and within various induced dipole models | 4-28   |
| 3   | Table S2. BP86/6-31G(d) optimized Cartesian coordinates and energies of the 1237 cluster isomers Mg <sub>2</sub> -Mg <sub>32</sub> considered in the study        | 29-414 |

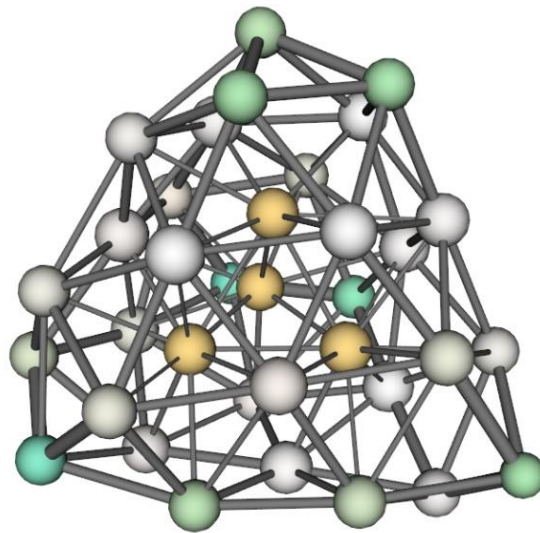

Figure S1. Global minimum structure of cluster  $\text{Mg}_{35}$  predicted by the MTP potential

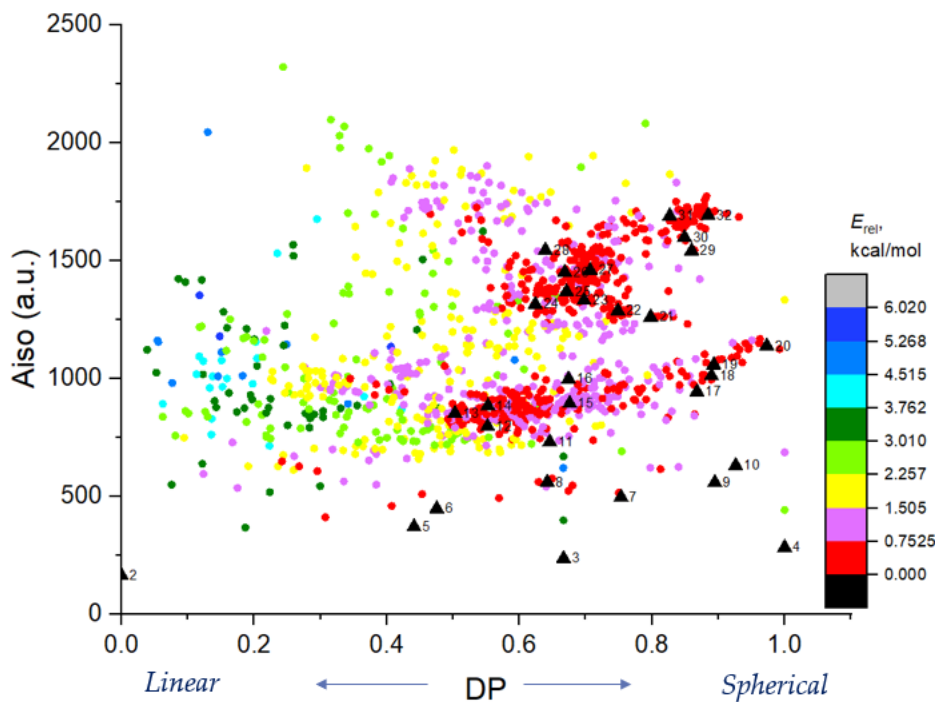

Figure S2. Dependence of DFT-calculated IEP of 1237 isomers of  $\text{Mg}_2$ - $\text{Mg}_{32}$  on the structure deformation parameter  $DP$ . Color designates the isomer relative energy. Black triangles correspond to the most favorable structures of nuclearity indicated by numerical labels.

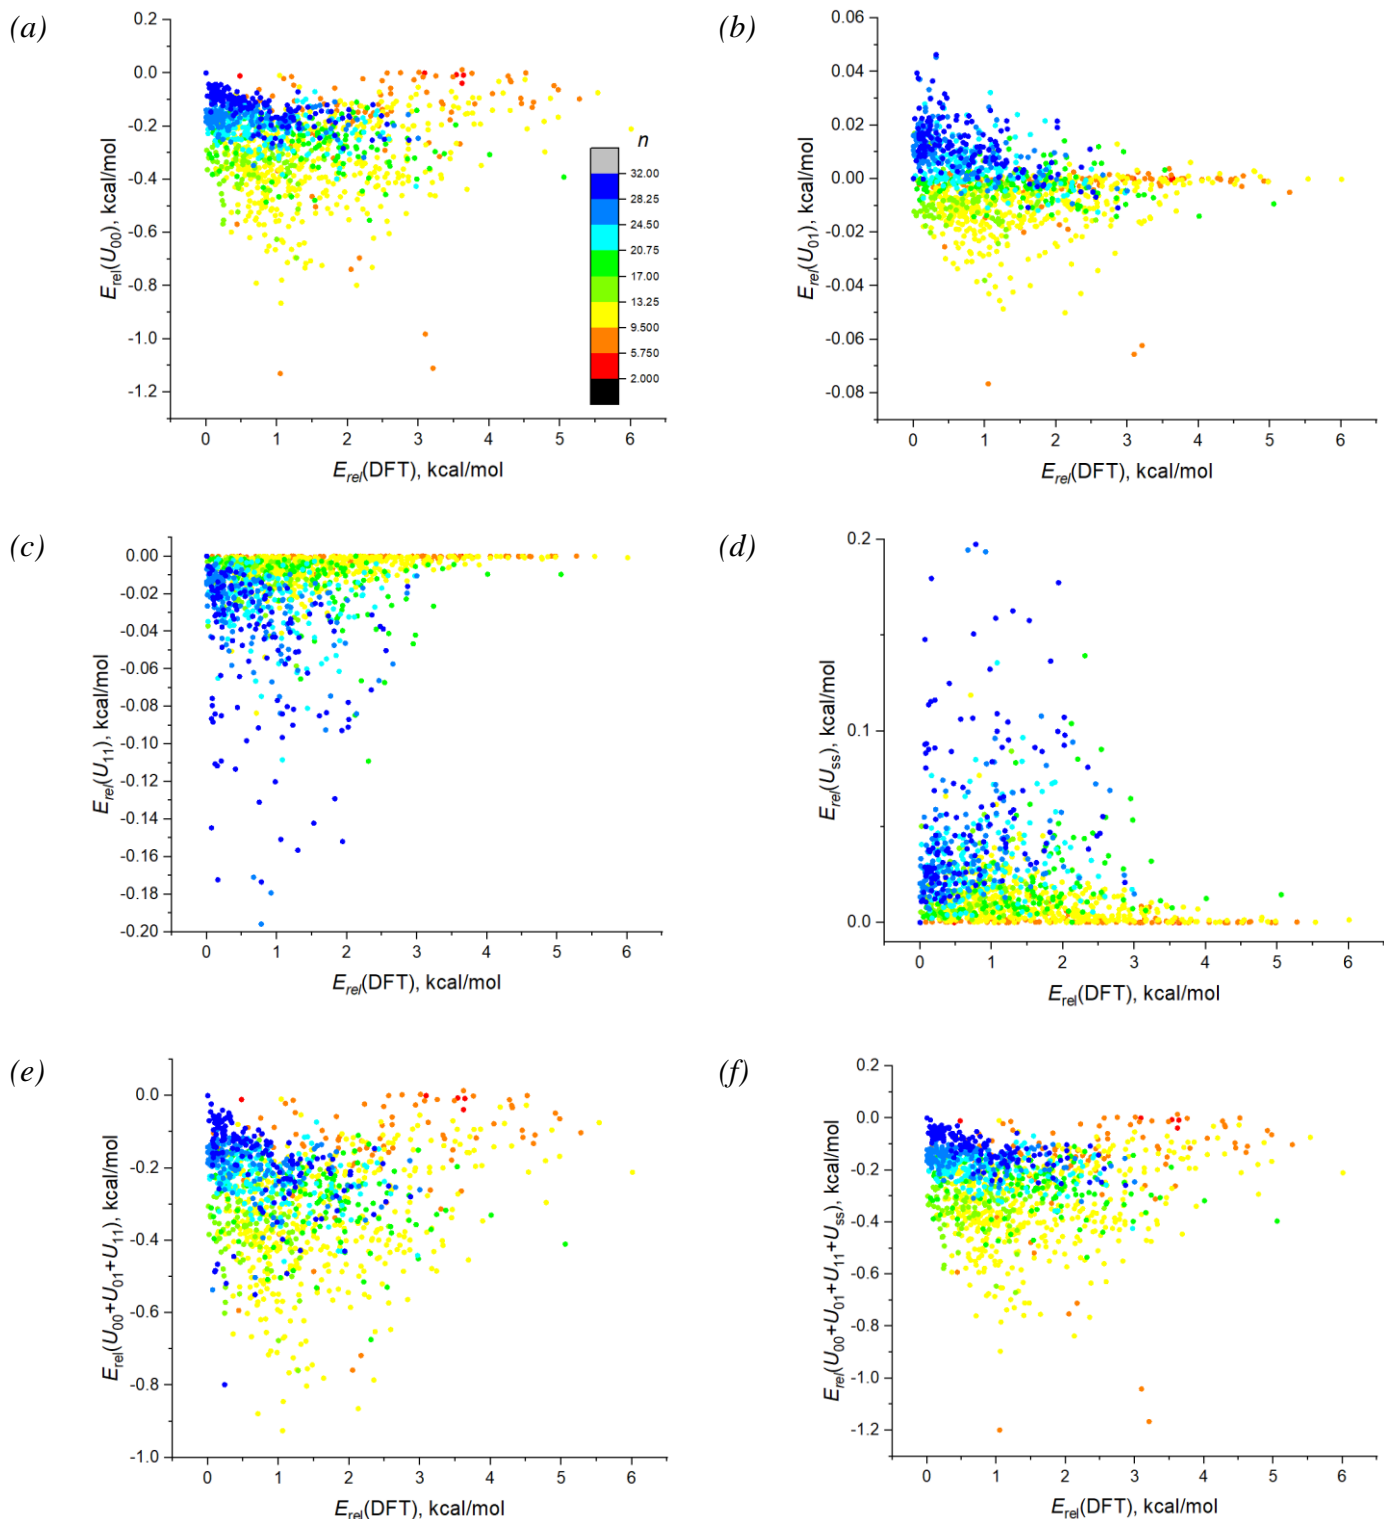

Figure S3. Correlations between the isomers' relative energies  $E_{\text{rel}}$  calculated by DFT and estimated on the basis of various energy components within the GD model ( $U_{00}$ ,  $U_{01}$ ,  $U_{11}$ ,  $U_{ss}$  and their combinations) for 1237 cluster isomers  $\text{Mg}_2\text{-Mg}_{32}$ . Color indicates the cluster nuclearity (single scale for all charts). Some data points located outside of the vertical axis ranges are omitted.

Table S1. Energies and polarizabilities of 1237 isomers of Mg<sub>2</sub>-Mg<sub>32</sub> calculated at the DFT level and within various induced dipole models. *n* is number of atoms; *E<sub>b</sub>*, *E<sub>rel</sub>* are the per atom binding energy and isomer relative energy in kcal/mol; *Aiso*, *Aaniso* are the isotropic polarizability and polarizability anisotropy, a.u.; *Etot* is the total energy of the optimized structure at the BP86/6-31G(d) level, Hartree. Most favorable isomers are marked with asterisks. *n\*alp* is the idealized polarizability of *n* atoms at DFT level.

| Polarizability models: |          |               |                      |                        | n*alp       | DFT results |               |             | AM model      |             | TL model      |             | TE model      |             | RP model      |             | GD model      |              | Etot          |             |
|------------------------|----------|---------------|----------------------|------------------------|-------------|-------------|---------------|-------------|---------------|-------------|---------------|-------------|---------------|-------------|---------------|-------------|---------------|--------------|---------------|-------------|
| <i>i</i>               | <i>n</i> | <i>isomer</i> | <i>E<sub>b</sub></i> | <i>E<sub>rel</sub></i> | <i>Aiso</i> | <i>Aiso</i> | <i>Aaniso</i> | <i>Aiso</i>  | <i>Aaniso</i> | <i>Etot</i> |
| 1                      | 2        | 1*            | -1.03                | 0.00                   | 146.95      | 162.54      | 120.11        | 173.52      | 165.33        | 145.26      | 0.43          | 144.89      | 1.86          | 157.04      | 113.04        | 153.19      | 98.78         | -400.142698  |               |             |
| 2                      | 3        | 1*            | -3.18                | 0.00                   | 220.42      | 235.82      | 124.35        | 331.14      | 291.19        | 215.28      | 0.58          | 213.88      | 2.63          | 230.53      | 133.88        | 225.25      | 122.40        | -600.224345  |               |             |
| 3                      | 4        | 1*            | -6.99                | 0.00                   | 293.90      | 282.37      | 0.00          | 595.17      | 0.00          | 283.55      | 0.00          | 280.33      | 0.00          | 279.45      | 0.00          | 280.36      | 0.00          | -800.323396  |               |             |
| 4                      | 4        | 2             | -3.35                | 3.64                   | 293.90      | 366.61      | 343.63        | 1145.51     | 2470.69       | 284.67      | 2.07          | 283.40      | 6.70          | 358.57      | 342.65        | 341.36      | 297.45        | -800.300209  |               |             |
| 5                      | 5        | 1*            | -7.04                | 0.00                   | 367.38      | 370.33      | 216.82        | 775.73      | 180.02        | 350.87      | 1.45          | 346.80      | 5.29          | 359.22      | 205.34        | 354.01      | 178.17        | -1000.404667 |               |             |
| 6                      | 5        | 2             | -6.56                | 0.48                   | 367.38      | 410.59      | 269.40        | -1176.92    | 5434.92       | 351.67      | 2.16          | 348.76      | 6.32          | 411.98      | 279.81        | 404.12      | 251.40        | -1000.400777 |               |             |
| 7                      | 5        | 3             | -3.95                | 3.09                   | 367.38      | 397.71      | 266.32        | 486.30      | 424.68        | 351.98      | 2.36          | 350.13      | 8.61          | 359.72      | 223.99        | 357.09      | 214.93        | -1000.380032 |               |             |
| 8                      | 5        | 4             | -3.50                | 3.54                   | 367.38      | 516.40      | 545.84        | -1186.09    | 5346.60       | 353.32      | 3.86          | 352.49      | 10.47         | 506.81      | 545.89        | 472.76      | 462.85        | -1000.376405 |               |             |
| 9                      | 5        | 5             | -3.42                | 3.62                   | 367.38      | 549.12      | 750.24        | -778.14     | 3460.91       | 353.93      | 5.24          | 353.16      | 12.62         | 535.93      | 736.05        | 491.80      | 607.83        | -1000.375797 |               |             |
| 10                     | 6        | 1*            | -7.38                | 0.00                   | 440.85      | 447.27      | 244.94        | 1259.21     | 659.37        | 416.95      | 2.28          | 412.10      | 7.78          | 433.66      | 248.97        | 425.59      | 222.12        | -1200.488831 |               |             |
| 11                     | 6        | 2             | -7.21                | 0.17                   | 440.85      | 458.61      | 284.78        | 1077.19     | 688.68        | 417.22      | 2.67          | 412.76      | 8.81          | 447.20      | 286.51        | 440.56      | 263.51        | -1200.487224 |               |             |
| 12                     | 6        | 3             | -6.68                | 0.70                   | 440.85      | 491.97      | 238.05        | -66.19      | 2482.60       | 417.76      | 2.22          | 414.17      | 6.74          | 481.18      | 235.30        | 469.44      | 213.07        | -1200.482144 |               |             |
| 13                     | 6        | 4             | -6.62                | 0.76                   | 440.85      | 535.14      | 585.30        | 2926.90     | 6418.66       | 418.42      | 4.68          | 415.11      | 12.97         | 512.58      | 537.16        | 490.58      | 458.37        | -1200.481561 |               |             |
| 14                     | 6        | 5             | -6.28                | 1.10                   | 440.85      | 549.16      | 385.94        | 1557.89     | 5984.69       | 419.00      | 3.50          | 416.73      | 9.03          | 555.80      | 409.97        | 537.16      | 363.09        | -1200.478280 |               |             |
| 15                     | 6        | 6             | -6.14                | 1.24                   | 440.85      | 594.59      | 691.32        | 17.97       | 2000.98       | 420.13      | 6.18          | 418.06      | 13.75         | 599.81      | 718.13        | 568.32      | 615.45        | -1200.476980 |               |             |
| 16                     | 6        | 7             | -4.82                | 2.56                   | 440.85      | 441.57      | 0.02          | 531.04      | 0.08          | 417.04      | 0.00          | 412.87      | 0.00          | 435.35      | 0.01          | 420.31      | 0.01          | -1200.464364 |               |             |
| 17                     | 6        | 8             | -4.31                | 3.07                   | 440.85      | 637.50      | 742.31        | -84.92      | 1868.51       | 421.07      | 7.06          | 420.20      | 15.60         | 643.37      | 793.98        | 597.81      | 673.26        | -1200.459470 |               |             |
| 18                     | 6        | 9             | -4.13                | 3.25                   | 440.85      | 542.58      | 517.13        | 1940.00     | 4538.02       | 419.52      | 4.88          | 418.26      | 14.08         | 477.30      | 414.56        | 468.52      | 386.78        | -1200.457757 |               |             |
| 19                     | 6        | 10            | -3.62                | 3.76                   | 440.85      | 668.43      | 578.35        | -2130.43    | 3602.60       | 421.15      | 4.72          | 421.09      | 12.42         | 657.86      | 570.89        | 607.52      | 490.52        | -1200.452844 |               |             |
| 20                     | 7        | 1*            | -8.58                | 0.00                   | 514.33      | 495.76      | 270.05        | 3132.18     | 1753.44       | 481.22      | 2.68          | 474.64      | 9.68          | 472.86      | 269.08        | 470.05      | 251.21        | -1400.583646 |               |             |
| 21                     | 7        | 2             | -8.30                | 0.28                   | 514.33      | 508.61      | 244.99        | 1025.24     | 1015.70       | 481.77      | 3.23          | 476.05      | 10.13         | 499.83      | 258.93        | 494.24      | 240.31        | -1400.580557 |               |             |
| 22                     | 7        | 3             | -8.20                | 0.38                   | 514.33      | 523.12      | 287.97        | -35706.65   | 104825.68     | 481.98      | 3.09          | 476.60      | 10.50         | 505.59      | 287.97        | 503.63      | 274.11        | -1400.579466 |               |             |
| 23                     | 7        | 4             | -8.07                | 0.51                   | 514.33      | 514.65      | 259.57        | 1439.32     | 135.35        | 481.74      | 2.88          | 476.04      | 10.00         | 493.61      | 270.60        | 489.28      | 252.74        | -1400.577931 |               |             |
| 24                     | 7        | 5             | -7.65                | 0.93                   | 514.33      | 540.41      | 296.28        | -5371.66    | 20382.74      | 482.24      | 3.29          | 477.28      | 11.12         | 522.94      | 284.86        | 520.82      | 274.87        | -1400.573298 |               |             |
| 25                     | 7        | 6             | -7.33                | 1.25                   | 514.33      | 562.31      | 430.72        | 3170.03     | 6382.11       | 482.76      | 4.56          | 478.22      | 13.25         | 542.55      | 424.52        | 532.19      | 390.31        | -1400.569708 |               |             |
| 26                     | 7        | 7             | -7.03                | 1.55                   | 514.33      | 611.24      | 566.64        | -2178.33    | 12057.29      | 483.64      | 5.71          | 479.82      | 15.12         | 590.69      | 545.42        | 566.96      | 475.92        | -1400.566380 |               |             |
| 27                     | 7        | 8             | -6.96                | 1.62                   | 514.33      | 626.75      | 632.39        | -569.86     | 4693.85       | 483.94      | 6.19          | 480.41      | 16.37         | 608.40      | 614.59        | 588.91      | 553.68        | -1400.565617 |               |             |
| 28                     | 7        | 9             | -6.91                | 1.67                   | 514.33      | 627.04      | 659.86        | -3117.43    | 12206.67      | 484.27      | 6.80          | 480.81      | 17.10         | 614.32      | 659.55        | 592.76      | 590.31        | -1400.565055 |               |             |
| 29                     | 7        | 10            | -6.36                | 2.22                   | 514.33      | 747.96      | 1102.30       | -3347.98    | 12575.75      | 485.74      | 9.24          | 483.29      | 21.63         | 690.71      | 947.94        | 645.36      | 796.23        | -1400.558857 |               |             |
| 30                     | 7        | 11            | -6.33                | 2.25                   | 514.33      | 674.66      | 601.98        | 268.57      | 1704.29       | 485.40      | 6.56          | 482.98      | 14.01         | 668.15      | 630.49        | 633.40      | 544.06        | -1400.558521 |               |             |
| 31                     | 7        | 12            | -6.25                | 2.33                   | 514.33      | 756.81      | 1122.19       | -231.59     | 3212.00       | 486.76      | 10.11         | 484.36      | 21.32         | 722.72      | 1042.26       | 665.99      | 856.37        | -1400.557669 |               |             |
| 32                     | 7        | 13            | -6.09                | 2.49                   | 514.33      | 690.85      | 364.54        | -290.12     | 2350.43       | 485.51      | 3.71          | 484.20      | 9.06          | 701.82      | 387.18        | 672.62      | 343.80        | -1400.555887 |               |             |
| 33                     | 7        | 14            | -5.97                | 2.61                   | 514.33      | 751.45      | 811.76        | -4860.56    | 14455.26      | 487.13      | 8.06          | 485.84      | 16.15         | 765.11      | 860.76        | 717.42      | 729.87        | -1400.554529 |               |             |
| 34                     | 7        | 15            | -5.83                | 2.75                   | 514.33      | 836.76      | 1288.61       | 134.73      | 1789.96       | 489.40      | 12.42         | 487.72      | 21.54         | 847.87      | 1335.14       | 770.82      | 1093.28       | -1400.552983 |               |             |
| 35                     | 7        | 16            | -4.31                | 4.27                   | 514.33      | 828.31      | 1052.26       | 283.92      | 2035.64       | 489.12      | 10.89         | 488.91      | 20.50         | 841.22      | 1131.25       | 766.18      | 936.27        | -1400.536001 |               |             |
| 36                     | 7        | 17            | -4.28                | 4.30                   | 514.33      | 714.05      | 833.09        | -3647.31    | 13769.68      | 486.79      | 8.46          | 486.30      | 20.43         | 614.91      | 648.01        | 597.77      | 598.01        | -1400.535679 |               |             |
| 37                     | 7        | 18            | -4.27                | 4.31                   | 514.33      | 891.99      | 1376.42       | 15.47       | 1694.79       | 490.79      | 13.72         | 490.11      | 23.26         | 904.72      | 1454.55       | 807.27      | 1174.52       | -1400.535580 |               |             |
| 38                     | 7        | 19            | -4.13                | 4.45                   | 514.33      | 761.66      | 1043.38       | -59.94      | 1593.19       | 488.00      | 10.27         | 487.54      | 21.81         | 668.64      | 854.95        | 636.39      | 754.58        | -1400.534056 |               |             |
| 39                     | 7        | 20            | -4.06                | 4.52                   | 514.33      | 620.16      | 489.60        | 1088.27     | 1213.98       | 486.19      | 6.14          | 486.43      | 17.30         | 549.24      | 389.58        | 540.54      | 369.54        | -1400.533191 |               |             |
| 40                     | 7        | 21            | -3.66                | 4.92                   | 514.33      | 891.27      | 977.02        | -1295.94    | 2778.00       | 489.77      | 8.86          | 490.44      | 17.95         | 879.29      | 970.97        | 789.27      | 793.65        | -1400.528727 |               |             |
| 41                     | 7        | 22            | -3.60                | 4.98                   | 514.33      | 980.79      | 1659.23       | 475.88      | 3259.73       | 491.30      | 13.41         | 491.50      | 24.51         | 959.11      | 1629.47       | 839.57      | 1287.88       | -1400.528069 |               |             |
| 42                     | 8        | 1*            | -9.21                | 0.00                   | 587.80      | 559.48      | 225.43        | -901.66     | 19644.59      | 544.82      | 3.13          | 537.47      | 10.29         | 537.01      | 236.46        | 535.99      | 229.35        | -1600.675118 |               |             |

| Polarizability models: |   |        |        | n*alp | DFT results |         | AM model |          | TL model  |        | TE model |        | RP model |         | GD model |        | Etot    |              |
|------------------------|---|--------|--------|-------|-------------|---------|----------|----------|-----------|--------|----------|--------|----------|---------|----------|--------|---------|--------------|
| i                      | n | isomer | Eb     | Erel  | Aiso        | Aaniso  | Aiso     | Aaniso   | Aiso      | Aaniso | Aiso     | Aaniso | Aiso     | Aaniso  | Aiso     | Aaniso |         |              |
| 43                     | 8 | 2      | -9.13  | 0.08  | 587.80      | 575.20  | 208.43   | 1935.10  | 1261.16   | 545.35 | 3.20     | 538.86 | 10.05    | 559.79  | 214.82   | 558.94 | 208.41  | -1600.674015 |
| 44                     | 8 | 3      | -8.85  | 0.36  | 587.80      | 560.13  | 213.58   | 2003.79  | 3218.01   | 545.10 | 3.13     | 538.26 | 9.88     | 536.35  | 212.63   | 536.71 | 206.67  | -1600.670429 |
| 45                     | 8 | 4      | -8.77  | 0.44  | 587.80      | 606.69  | 504.25   | -274.40  | 5208.38   | 546.18 | 6.45     | 540.24 | 18.46    | 585.35  | 482.24   | 574.72 | 434.90  | -1600.669471 |
| 46                     | 8 | 5      | -8.77  | 0.44  | 587.80      | 544.56  | 197.99   | 639.50   | 1678.69   | 544.62 | 2.63     | 537.09 | 8.66     | 517.71  | 180.23   | 516.33 | 175.09  | -1600.669410 |
| 47                     | 8 | 6      | -8.64  | 0.57  | 587.80      | 626.76  | 525.91   | 5595.52  | 15901.73  | 546.96 | 7.19     | 541.91 | 19.47    | 611.36  | 509.93   | 601.29 | 465.52  | -1600.667789 |
| 48                     | 8 | 7      | -8.46  | 0.75  | 587.80      | 648.20  | 551.65   | -2507.54 | 10077.25  | 547.74 | 7.94     | 543.44 | 20.34    | 630.11  | 534.56   | 622.35 | 497.98  | -1600.665545 |
| 49                     | 8 | 8      | -8.16  | 1.05  | 587.80      | 651.46  | 543.26   | 8867.27  | 25032.08  | 546.73 | 6.07     | 541.37 | 17.06    | 620.97  | 517.24   | 606.72 | 470.61  | -1600.661642 |
| 50                     | 8 | 9      | -8.01  | 1.20  | 587.80      | 670.31  | 600.30   | -702.21  | 4802.87   | 547.61 | 7.45     | 543.03 | 18.89    | 661.41  | 611.33   | 645.17 | 561.24  | -1600.659801 |
| 51                     | 8 | 10     | -8.00  | 1.21  | 587.80      | 727.87  | 653.39   | 474.31   | 1726.11   | 551.01 | 10.91    | 548.73 | 21.68    | 782.10  | 810.19   | 762.72 | 748.35  | -1600.659626 |
| 52                     | 8 | 11     | -7.87  | 1.34  | 587.80      | 693.33  | 586.89   | 24972.38 | 79737.55  | 547.89 | 6.62     | 543.80 | 17.61    | 670.25  | 568.13   | 657.30 | 524.87  | -1600.657976 |
| 53                     | 8 | 12     | -7.85  | 1.36  | 587.80      | 698.62  | 622.41   | -2168.20 | 7927.92   | 548.30 | 7.28     | 544.31 | 18.11    | 679.98  | 621.95   | 667.32 | 582.25  | -1600.657728 |
| 54                     | 8 | 13     | -7.73  | 1.48  | 587.80      | 679.39  | 535.48   | -3070.54 | 13996.12  | 547.59 | 6.26     | 543.22 | 16.57    | 652.48  | 525.28   | 636.53 | 478.98  | -1600.656142 |
| 55                     | 8 | 14     | -7.36  | 1.85  | 587.80      | 712.85  | 606.88   | 630.43   | 3567.02   | 548.45 | 7.11     | 544.86 | 18.20    | 692.46  | 593.04   | 677.90 | 548.84  | -1600.651542 |
| 56                     | 8 | 15     | -6.77  | 2.44  | 587.80      | 788.38  | 811.06   | 40716.07 | 126492.47 | 549.96 | 8.97     | 547.31 | 20.87    | 762.12  | 783.41   | 719.33 | 672.98  | -1600.644026 |
| 57                     | 8 | 16     | -6.74  | 2.47  | 587.80      | 815.17  | 994.85   | 340.05   | 3509.96   | 550.73 | 10.68    | 548.28 | 23.81    | 798.91  | 985.68   | 761.09 | 876.80  | -1600.643629 |
| 58                     | 8 | 17     | -6.68  | 2.53  | 587.80      | 838.08  | 1109.49  | 1985.97  | 6114.24   | 551.59 | 12.05    | 548.81 | 24.03    | 809.80  | 1068.62  | 752.17 | 895.21  | -1600.642793 |
| 59                     | 8 | 18     | -6.65  | 2.56  | 587.80      | 859.17  | 1185.62  | 346.12   | 2375.83   | 551.88 | 12.46    | 549.36 | 25.13    | 834.53  | 1152.78  | 784.25 | 997.32  | -1600.642410 |
| 60                     | 8 | 19     | -6.60  | 2.61  | 587.80      | 851.56  | 1153.03  | 283.30   | 2234.62   | 552.73 | 13.77    | 550.75 | 26.79    | 842.39  | 1160.30  | 783.14 | 977.71  | -1600.641804 |
| 61                     | 8 | 20     | -6.59  | 2.62  | 587.80      | 861.40  | 1229.70  | 106.59   | 2777.34   | 552.59 | 13.60    | 549.97 | 26.06    | 848.28  | 1231.96  | 792.41 | 1056.94 | -1600.641643 |
| 62                     | 8 | 21     | -6.27  | 2.94  | 587.80      | 845.10  | 830.05   | -2254.36 | 7474.38   | 553.03 | 11.27    | 552.25 | 20.73    | 887.47  | 967.49   | 837.02 | 840.35  | -1600.637626 |
| 63                     | 8 | 22     | -6.20  | 3.01  | 587.80      | 877.07  | 1053.23  | 632.27   | 2239.63   | 554.15 | 13.68    | 553.21 | 24.46    | 920.78  | 1201.70  | 858.97 | 1032.19 | -1600.636667 |
| 64                     | 8 | 23     | -6.09  | 3.12  | 587.80      | 1024.80 | 1806.99  | -200.70  | 3288.30   | 554.09 | 15.79    | 552.47 | 30.69    | 932.92  | 1550.30  | 842.90 | 1261.78 | -1600.635252 |
| 65                     | 8 | 24     | -5.72  | 3.49  | 587.80      | 1016.92 | 1460.75  | -1882.68 | 5873.74   | 556.41 | 15.28    | 555.42 | 24.25    | 1040.96 | 1544.03  | 938.75 | 1249.08 | -1600.630553 |
| 66                     | 8 | 25     | -5.59  | 3.62  | 587.80      | 1121.82 | 1998.78  | 205.76   | 1728.84   | 559.07 | 19.30    | 557.40 | 29.24    | 1122.80 | 2023.29  | 987.62 | 1605.46 | -1600.628965 |
| 67                     | 9 | 1*     | -10.94 | 0.00  | 661.28      | 558.63  | 120.55   | 911.89   | 437.95    | 606.37 | 1.72     | 597.08 | 5.59     | 524.14  | 95.68    | 529.24 | 98.26   | -1800.784275 |
| 68                     | 9 | 2      | -10.23 | 0.71  | 661.28      | 614.86  | 169.02   | 1258.28  | 1849.55   | 607.25 | 2.85     | 599.17 | 9.00     | 592.48  | 173.60   | 597.33 | 178.44  | -1800.774042 |
| 69                     | 9 | 3      | -10.00 | 0.94  | 661.28      | 624.01  | 173.46   | 26252.53 | 39147.02  | 607.61 | 2.92     | 600.09 | 8.97     | 600.83  | 185.71   | 605.48 | 187.06  | -1800.770778 |
| 70                     | 9 | 4      | -9.93  | 1.01  | 661.28      | 621.58  | 81.45    | 1348.39  | 494.87    | 607.11 | 1.82     | 598.92 | 5.70     | 587.95  | 95.85    | 590.36 | 106.71  | -1800.769753 |
| 71                     | 9 | 5      | -9.44  | 1.50  | 661.28      | 660.00  | 440.98   | 1789.24  | 4743.58   | 608.18 | 6.34     | 600.96 | 18.47    | 631.05  | 431.27   | 623.90 | 399.60  | -1800.762794 |
| 72                     | 9 | 6      | -9.39  | 1.55  | 661.28      | 658.20  | 435.58   | 7858.10  | 21959.61  | 608.09 | 6.11     | 600.80 | 17.95    | 628.26  | 436.98   | 620.82 | 403.99  | -1800.761993 |
| 73                     | 9 | 7      | -9.15  | 1.79  | 661.28      | 694.49  | 505.43   | -1310.43 | 7142.85   | 609.77 | 8.25     | 604.30 | 21.77    | 683.27  | 518.31   | 675.36 | 483.90  | -1800.758576 |
| 74                     | 9 | 8      | -9.14  | 1.80  | 661.28      | 678.47  | 501.14   | 3358.83  | 7711.77   | 608.96 | 7.62     | 602.57 | 21.03    | 654.88  | 503.14   | 645.43 | 465.88  | -1800.758383 |
| 75                     | 9 | 9      | -9.12  | 1.82  | 661.28      | 702.09  | 497.81   | 878.88   | 4525.41   | 609.65 | 7.47     | 604.01 | 19.76    | 671.78  | 466.10   | 670.59 | 451.04  | -1800.758190 |
| 76                     | 9 | 10     | -9.09  | 1.85  | 661.28      | 680.29  | 437.37   | -3212.69 | 13366.82  | 608.87 | 6.42     | 602.67 | 18.10    | 661.47  | 431.81   | 652.11 | 394.31  | -1800.757765 |
| 77                     | 9 | 11     | -9.09  | 1.85  | 661.28      | 683.68  | 439.05   | 410.15   | 3085.88   | 609.03 | 6.56     | 603.00 | 18.30    | 668.98  | 433.32   | 659.80 | 396.61  | -1800.757748 |
| 78                     | 9 | 12     | -9.07  | 1.87  | 661.28      | 689.68  | 437.22   | 1174.25  | 2237.44   | 609.10 | 6.16     | 603.27 | 17.78    | 669.03  | 426.78   | 661.02 | 393.23  | -1800.757416 |
| 79                     | 9 | 13     | -8.90  | 2.04  | 661.28      | 703.37  | 586.41   | 885.49   | 517.94    | 609.74 | 8.90     | 604.02 | 23.49    | 679.54  | 572.86   | 663.25 | 518.72  | -1800.754982 |
| 80                     | 9 | 14     | -8.89  | 2.05  | 661.28      | 711.08  | 540.54   | -164.21  | 2387.66   | 609.45 | 7.50     | 603.43 | 19.77    | 688.23  | 552.40   | 680.58 | 528.03  | -1800.754898 |
| 81                     | 9 | 15     | -8.86  | 2.08  | 661.28      | 698.52  | 483.52   | -4261.30 | 15856.24  | 609.43 | 7.34     | 603.77 | 20.16    | 678.76  | 484.30   | 668.01 | 448.17  | -1800.754427 |
| 82                     | 9 | 16     | -8.79  | 2.15  | 661.28      | 739.97  | 544.56   | 804.92   | 2184.75   | 610.46 | 7.74     | 605.42 | 18.90    | 723.42  | 558.02   | 715.81 | 534.46  | -1800.753438 |
| 83                     | 9 | 17     | -8.77  | 2.17  | 661.28      | 718.63  | 481.20   | -775.35  | 3624.88   | 609.53 | 6.26     | 603.73 | 16.64    | 686.21  | 451.13   | 673.36 | 412.97  | -1800.753114 |
| 84                     | 9 | 18     | -8.76  | 2.18  | 661.28      | 742.82  | 519.63   | 19375.40 | 57605.86  | 610.43 | 7.09     | 605.48 | 17.61    | 725.67  | 514.62   | 715.09 | 481.58  | -1800.752934 |
| 85                     | 9 | 19     | -8.68  | 2.26  | 661.28      | 744.69  | 725.14   | 7300.33  | 15852.63  | 611.16 | 10.82    | 606.59 | 26.64    | 732.22  | 720.74   | 712.24 | 653.67  | -1800.751812 |
| 86                     | 9 | 20     | -8.57  | 2.37  | 661.28      | 727.86  | 566.55   | 290.18   | 2374.16   | 610.21 | 7.81     | 604.88 | 19.23    | 702.16  | 557.55   | 696.77 | 536.19  | -1800.750247 |
| 87                     | 9 | 21     | -8.50  | 2.44  | 661.28      | 758.82  | 717.20   | 176.65   | 2718.01   | 611.97 | 11.39    | 608.06 | 26.79    | 751.69  | 738.75   | 734.88 | 681.50  | -1800.749330 |
| 88                     | 9 | 22     | -8.45  | 2.49  | 661.28      | 788.31  | 844.47   | -2182.38 | 9463.33   | 611.76 | 11.06    | 607.38 | 26.28    | 754.87  | 777.97   | 733.32 | 704.27  | -1800.748505 |
| 89                     | 9 | 23     | -7.84  | 3.10  | 661.28      | 830.73  | 885.11   | -7638.93 | 11263.12  | 611.91 | 10.36    | 607.90 | 25.24    | 786.22  | 815.88   | 757.96 | 733.15  | -1800.739871 |
| 90                     | 9 | 24     | -7.79  | 3.15  | 661.28      | 853.92  | 947.56   | 2102.31  | 7460.75   | 613.27 | 12.01    | 609.94 | 26.63    | 848.82  | 964.39   | 818.25 | 878.07  | -1800.739090 |
| 91                     | 9 | 25     | -7.73  | 3.21  | 661.28      | 873.56  | 1058.75  | -2682.66 | 12456.20  | 613.89 | 12.93    | 609.95 | 26.60    | 836.75  | 1018.88  | 792.79 | 881.53  | -1800.738193 |
| 92                     | 9 | 26     | -7.64  | 3.30  | 661.28      | 904.14  | 1162.40  | 295.15   | 2071.54   | 615.18 | 14.81    | 611.78 | 28.68    | 896.35  | 1181.02  | 851.85 | 1043.56 | -1800.736913 |
| 93                     | 9 | 27     | -7.61  | 3.33  | 661.28      | 874.53  | 750.54   | -917.90  | 1067.98   | 613.38 | 9.11     | 610.80 | 22.23    | 844.72  | 723.05   | 818.94 | 658.74  | -1800.736492 |

| Polarizability models: |    |        |        | n*alp | DFT results |         | AM model |           | TL model  |        | TE model |        | RP model |         | GD model |         | Etot    |              |
|------------------------|----|--------|--------|-------|-------------|---------|----------|-----------|-----------|--------|----------|--------|----------|---------|----------|---------|---------|--------------|
| i                      | n  | isomer | Eb     | Erel  | Aiso        | Aaiso   | Aiso     | Aaiso     | Aiso      | Aaiso  | Aiso     | Aaiso  | Aiso     | Aaiso   | Aiso     | Aaiso   |         |              |
| 94                     | 9  | 28     | -7.59  | 3.35  | 661.28      | 885.03  | 862.49   | -2466.67  | 4592.86   | 613.93 | 10.48    | 611.34 | 23.81    | 861.06  | 850.98   | 835.94  | 788.23  | -1800.736289 |
| 95                     | 9  | 29     | -7.49  | 3.45  | 661.28      | 930.02  | 1141.64  | -1453.02  | 1361.96   | 615.47 | 13.76    | 612.59 | 26.86    | 902.09  | 1113.05  | 860.07  | 980.27  | -1800.734760 |
| 96                     | 9  | 30     | -7.47  | 3.47  | 661.28      | 938.10  | 1192.07  | -1410.65  | 5969.71   | 616.32 | 14.95    | 613.34 | 27.34    | 920.11  | 1198.15  | 878.97  | 1071.82 | -1800.734463 |
| 97                     | 9  | 31     | -7.35  | 3.59  | 661.28      | 910.50  | 1072.44  | 512.32    | 3649.05   | 615.10 | 13.28    | 611.99 | 25.63    | 877.25  | 1046.72  | 832.30  | 911.93  | -1800.732834 |
| 98                     | 9  | 32     | -7.14  | 3.80  | 661.28      | 870.40  | 694.78   | -271.66   | 2189.29   | 613.33 | 8.49     | 611.05 | 19.39    | 841.28  | 651.02   | 815.54  | 588.49  | -1800.729710 |
| 99                     | 9  | 33     | -6.89  | 4.05  | 661.28      | 959.80  | 1216.64  | 553.84    | 2037.81   | 617.46 | 16.83    | 615.61 | 30.72    | 962.15  | 1273.57  | 909.87  | 1124.17 | -1800.726133 |
| 100                    | 9  | 34     | -6.48  | 4.46  | 661.28      | 1073.18 | 1589.02  | 1637.83   | 5442.28   | 619.03 | 17.98    | 617.37 | 32.48    | 1061.12 | 1601.00  | 982.41  | 1371.72 | -1800.720265 |
| 101                    | 9  | 35     | -6.33  | 4.61  | 661.28      | 1155.15 | 1929.01  | 382.40    | 1992.29   | 623.04 | 23.42    | 620.81 | 35.59    | 1153.15 | 1961.44  | 1029.19 | 1582.13 | -1800.718134 |
| 102                    | 9  | 36     | -6.31  | 4.63  | 661.28      | 1161.32 | 2001.07  | 335.94    | 2284.53   | 622.10 | 22.03    | 619.58 | 35.01    | 1149.83 | 2009.89  | 1033.68 | 1651.30 | -1800.717925 |
| 103                    | 9  | 37     | -5.66  | 5.28  | 661.28      | 1135.24 | 1061.96  | 359.65    | 2738.01   | 620.97 | 12.36    | 621.88 | 20.53    | 1165.61 | 1132.48  | 1066.99 | 939.86  | -1800.708469 |
| 104                    | 10 | 1*     | -12.26 | 0.00  | 734.75      | 630.77  | 40.26    | 1775.80   | 1734.91   | 667.45 | 0.69     | 657.03 | 2.00     | 577.61  | 48.55    | 588.50  | 53.87   | -2000.892523 |
| 105                    | 10 | 2      | -11.22 | 1.04  | 734.75      | 686.16  | 0.00     | -5611.82  | 1.78      | 669.05 | 0.00     | 660.98 | 0.00     | 663.38  | 0.00     | 674.39  | 0.00    | -2000.875833 |
| 106                    | 10 | 3      | -10.45 | 1.81  | 734.75      | 709.29  | 424.42   | 200.98    | 1995.80   | 670.14 | 6.32     | 662.60 | 15.50    | 665.60  | 374.06   | 665.19  | 362.06  | -2000.863680 |
| 107                    | 10 | 4      | -10.41 | 1.85  | 734.75      | 686.23  | 388.38   | 1559.71   | 3333.54   | 668.91 | 5.73     | 660.41 | 16.55    | 650.46  | 381.64   | 647.50  | 360.69  | -2000.862955 |
| 108                    | 10 | 5      | -10.39 | 1.87  | 734.75      | 686.54  | 389.67   | -2538.44  | 13366.95  | 668.89 | 5.53     | 660.39 | 16.01    | 649.29  | 365.89   | 646.23  | 345.56  | -2000.862692 |
| 109                    | 10 | 6      | -10.24 | 2.02  | 734.75      | 699.61  | 376.78   | 1448.71   | 1874.94   | 669.02 | 5.82     | 660.55 | 17.08    | 669.39  | 367.69   | 666.99  | 348.53  | -2000.860211 |
| 110                    | 10 | 7      | -10.13 | 2.13  | 734.75      | 702.67  | 437.58   | 81.97     | 2502.23   | 669.27 | 7.20     | 660.88 | 20.66    | 670.07  | 441.27   | 668.26  | 426.90  | -2000.858469 |
| 111                    | 10 | 8      | -10.13 | 2.13  | 734.75      | 715.87  | 364.42   | 2945.65   | 3901.24   | 669.51 | 5.53     | 661.79 | 15.84    | 689.44  | 359.48   | 685.93  | 336.35  | -2000.858427 |
| 112                    | 10 | 9      | -10.12 | 2.14  | 734.75      | 707.23  | 335.87   | 2309.81   | 5161.12   | 668.96 | 5.72     | 660.41 | 16.49    | 666.66  | 338.53   | 663.73  | 327.10  | -2000.858417 |
| 113                    | 10 | 10     | -10.08 | 2.18  | 734.75      | 717.52  | 366.11   | 10057.93  | 26173.37  | 669.57 | 5.76     | 661.91 | 16.46    | 692.52  | 357.45   | 688.95  | 334.11  | -2000.857750 |
| 114                    | 10 | 11     | -10.03 | 2.23  | 734.75      | 741.77  | 424.73   | 4944.06   | 15486.18  | 670.29 | 6.50     | 663.23 | 17.78    | 709.46  | 408.16   | 709.32  | 392.70  | -2000.856888 |
| 115                    | 10 | 12     | -10.01 | 2.25  | 734.75      | 736.92  | 408.92   | -40210.18 | 123327.02 | 670.20 | 6.44     | 663.05 | 17.37    | 704.05  | 390.87   | 703.53  | 374.68  | -2000.856661 |
| 116                    | 10 | 13     | -9.94  | 2.32  | 734.75      | 719.58  | 405.44   | 2937.55   | 6514.10   | 669.74 | 6.84     | 662.09 | 18.96    | 690.27  | 410.11   | 686.17  | 394.39  | -2000.855433 |
| 117                    | 10 | 14     | -9.90  | 2.36  | 734.75      | 722.46  | 357.66   | 3359.45   | 4314.35   | 669.55 | 5.24     | 662.03 | 15.05    | 690.64  | 347.27   | 684.50  | 316.70  | -2000.854863 |
| 118                    | 10 | 15     | -9.84  | 2.42  | 734.75      | 781.85  | 496.63   | -1703.96  | 7783.84   | 671.58 | 7.54     | 665.34 | 17.81    | 760.71  | 504.27   | 760.21  | 493.08  | -2000.853941 |
| 119                    | 10 | 16     | -9.81  | 2.45  | 734.75      | 768.75  | 456.54   | -5569.51  | 19459.58  | 671.06 | 6.90     | 664.66 | 17.42    | 743.32  | 445.71   | 741.61  | 430.65  | -2000.853440 |
| 120                    | 10 | 17     | -9.81  | 2.45  | 734.75      | 737.39  | 402.95   | 2176.57   | 1854.38   | 670.33 | 6.82     | 663.50 | 18.59    | 716.60  | 404.86   | 712.15  | 382.54  | -2000.853428 |
| 121                    | 10 | 18     | -9.81  | 2.45  | 734.75      | 750.18  | 413.77   | 1733.58   | 9337.19   | 670.62 | 6.28     | 664.04 | 16.53    | 714.14  | 395.29   | 713.91  | 378.07  | -2000.853379 |
| 122                    | 10 | 19     | -9.78  | 2.48  | 734.75      | 754.34  | 432.22   | 5653.83   | 11789.63  | 670.85 | 7.13     | 664.42 | 18.61    | 724.23  | 416.55   | 723.60  | 404.09  | -2000.852884 |
| 123                    | 10 | 20     | -9.75  | 2.51  | 734.75      | 732.12  | 450.81   | 9802.90   | 25355.68  | 670.61 | 8.09     | 663.98 | 22.05    | 707.43  | 462.91   | 703.72  | 444.42  | -2000.852493 |
| 124                    | 10 | 21     | -9.73  | 2.53  | 734.75      | 734.08  | 445.73   | -2706.80  | 10999.30  | 670.48 | 8.07     | 663.60 | 21.38    | 712.61  | 465.46   | 707.66  | 445.28  | -2000.852151 |
| 125                    | 10 | 22     | -9.68  | 2.58  | 734.75      | 748.64  | 375.50   | 1730.85   | 1898.36   | 670.23 | 6.12     | 663.16 | 16.10    | 709.46  | 368.57   | 706.97  | 360.26  | -2000.851385 |
| 126                    | 10 | 23     | -9.68  | 2.58  | 734.75      | 717.11  | 434.76   | -2289.15  | 9375.32   | 670.26 | 7.51     | 663.34 | 20.92    | 691.11  | 448.78   | 685.55  | 426.20  | -2000.851347 |
| 127                    | 10 | 24     | -9.67  | 2.59  | 734.75      | 739.00  | 538.35   | -955.65   | 6089.26   | 670.57 | 9.16     | 663.57 | 25.04    | 710.32  | 537.52   | 700.95  | 501.16  | -2000.851184 |
| 128                    | 10 | 25     | -9.64  | 2.62  | 734.75      | 793.73  | 508.30   | -1748.52  | 5095.07   | 672.02 | 7.67     | 666.33 | 17.93    | 771.83  | 517.75   | 770.88  | 503.17  | -2000.850757 |
| 129                    | 10 | 26     | -9.61  | 2.65  | 734.75      | 743.08  | 483.65   | 3379.22   | 7530.41   | 670.44 | 8.26     | 663.43 | 22.30    | 712.90  | 476.00   | 703.98  | 446.58  | -2000.850217 |
| 130                    | 10 | 27     | -9.58  | 2.68  | 734.75      | 775.29  | 441.98   | 1938.76   | 1485.21   | 671.04 | 7.26     | 664.53 | 17.62    | 743.95  | 465.90   | 743.83  | 469.00  | -2000.849783 |
| 131                    | 10 | 28     | -9.55  | 2.71  | 734.75      | 788.53  | 431.22   | 345.87    | 3661.45   | 671.34 | 6.47     | 665.02 | 14.66    | 752.25  | 425.71   | 746.67  | 408.23  | -2000.849196 |
| 132                    | 10 | 29     | -9.47  | 2.79  | 734.75      | 740.08  | 400.35   | 3819.19   | 8829.47   | 670.27 | 6.98     | 663.46 | 19.11    | 718.72  | 414.32   | 711.89  | 389.52  | -2000.848016 |
| 133                    | 10 | 30     | -9.42  | 2.84  | 734.75      | 748.24  | 470.37   | -626.99   | 5258.57   | 670.95 | 8.74     | 664.58 | 22.81    | 722.40  | 479.54   | 711.85  | 446.51  | -2000.847129 |
| 134                    | 10 | 31     | -9.40  | 2.86  | 734.75      | 772.93  | 567.25   | 1743.50   | 1745.63   | 671.52 | 9.67     | 665.56 | 25.36    | 746.91  | 566.15   | 734.22  | 523.73  | -2000.846816 |
| 135                    | 10 | 32     | -9.40  | 2.86  | 734.75      | 766.00  | 558.51   | 1781.82   | 2308.76   | 671.69 | 10.30    | 665.74 | 25.85    | 744.80  | 564.06   | 732.52  | 523.87  | -2000.846810 |
| 136                    | 10 | 33     | -9.36  | 2.90  | 734.75      | 781.86  | 560.50   | 1110.46   | 4146.15   | 671.77 | 9.44     | 666.19 | 25.07    | 757.94  | 558.56   | 747.55  | 519.01  | -2000.846260 |
| 137                    | 10 | 34     | -9.35  | 2.91  | 734.75      | 792.77  | 612.13   | -2333.52  | 12176.09  | 672.68 | 11.04    | 667.76 | 27.52    | 785.79  | 641.37   | 778.40  | 611.84  | -2000.846072 |
| 138                    | 10 | 35     | -9.33  | 2.93  | 734.75      | 777.28  | 531.83   | 2122.82   | 8659.38   | 671.57 | 8.92     | 665.82 | 23.71    | 751.87  | 532.87   | 741.03  | 495.36  | -2000.845689 |
| 139                    | 10 | 36     | -9.32  | 2.94  | 734.75      | 733.69  | 460.64   | 2887.91   | 4129.34   | 671.17 | 8.88     | 665.29 | 24.49    | 721.79  | 467.53   | 716.05  | 425.46  | -2000.845638 |
| 140                    | 10 | 37     | -9.15  | 3.11  | 734.75      | 790.08  | 684.22   | 4189.28   | 6735.03   | 672.20 | 11.54    | 666.53 | 28.71    | 771.77  | 700.68   | 751.48  | 637.05  | -2000.842865 |
| 141                    | 10 | 38     | -9.12  | 3.14  | 734.75      | 801.12  | 734.07   | 25337.15  | 73019.68  | 672.78 | 12.61    | 667.41 | 30.60    | 787.31  | 750.19   | 764.94  | 679.38  | -2000.842383 |
| 142                    | 10 | 39     | -9.09  | 3.17  | 734.75      | 835.66  | 755.01   | -2185.75  | 8163.60   | 672.84 | 11.16    | 667.31 | 26.33    | 795.34  | 721.70   | 776.81  | 660.27  | -2000.841926 |
| 143                    | 10 | 40     | -9.06  | 3.20  | 734.75      | 841.50  | 825.39   | -163.46   | 2091.45   | 672.60 | 11.60    | 667.04 | 28.15    | 792.37  | 762.92   | 773.97  | 700.37  | -2000.841488 |
| 144                    | 10 | 41     | -9.02  | 3.24  | 734.75      | 847.92  | 824.77   | 52.77     | 2954.30   | 672.94 | 11.54    | 667.42 | 27.16    | 808.28  | 797.82   | 785.68  | 722.26  | -2000.840795 |

| Polarizability models: |    |        |        | n*alp | DFT results |         | AM model |           | TL model  |        | TE model |        | RP model |         | GD model |         | Etot    |              |
|------------------------|----|--------|--------|-------|-------------|---------|----------|-----------|-----------|--------|----------|--------|----------|---------|----------|---------|---------|--------------|
| i                      | n  | isomer | Eb     | Erel  | Aiso        | Aaniso  | Aiso     | Aaniso    | Aiso      | Aaniso | Aiso     | Aaniso | Aiso     | Aaniso  | Aiso     | Aaniso  |         |              |
| 145                    | 10 | 42     | -8.92  | 3.34  | 734.75      | 857.95  | 983.94   | 63628.43  | 186734.57 | 674.74 | 15.82    | 670.33 | 36.11    | 826.78  | 939.46   | 801.02  | 844.68  | -2000.839170 |
| 146                    | 10 | 43     | -8.81  | 3.45  | 734.75      | 875.75  | 941.95   | -1391.99  | 7039.63   | 674.18 | 13.91    | 669.42 | 31.51    | 838.67  | 903.51   | 814.57  | 824.90  | -2000.837479 |
| 147                    | 10 | 44     | -8.80  | 3.46  | 734.75      | 861.39  | 813.17   | 94.40     | 3218.21   | 673.79 | 12.03    | 669.13 | 28.18    | 832.66  | 803.95   | 809.31  | 734.48  | -2000.837312 |
| 148                    | 10 | 45     | -8.79  | 3.47  | 734.75      | 884.17  | 753.74   | -87105.17 | 258756.84 | 674.42 | 11.12    | 670.51 | 25.73    | 850.28  | 717.82   | 838.94  | 680.92  | -2000.837165 |
| 149                    | 10 | 46     | -8.76  | 3.50  | 734.75      | 873.00  | 822.89   | -3607.71  | 9495.40   | 673.82 | 11.45    | 669.41 | 26.79    | 847.03  | 778.61   | 824.16  | 706.30  | -2000.836672 |
| 150                    | 10 | 47     | -8.73  | 3.53  | 734.75      | 913.37  | 987.71   | 51.51     | 3771.39   | 675.51 | 14.43    | 671.29 | 30.24    | 862.98  | 907.04   | 844.64  | 840.92  | -2000.836141 |
| 151                    | 10 | 48     | -8.72  | 3.54  | 734.75      | 851.02  | 870.38   | 610.50    | 2265.15   | 673.33 | 12.16    | 668.24 | 28.50    | 811.42  | 828.31   | 791.52  | 760.04  | -2000.835966 |
| 152                    | 10 | 49     | -8.49  | 3.77  | 734.75      | 923.20  | 801.72   | -178.41   | 4314.99   | 675.29 | 11.39    | 671.92 | 24.99    | 906.85  | 813.11   | 887.80  | 766.09  | -2000.832335 |
| 153                    | 10 | 50     | -8.40  | 3.86  | 734.75      | 964.55  | 1243.33  | -75.57    | 3252.25   | 676.92 | 17.76    | 673.57 | 37.27    | 941.26  | 1211.90  | 903.51  | 1092.16 | -2000.831004 |
| 154                    | 10 | 51     | -8.38  | 3.88  | 734.75      | 977.47  | 1113.83  | 879.35    | 2006.39   | 677.71 | 16.05    | 674.01 | 29.35    | 964.39  | 1142.85  | 933.03  | 1046.09 | -2000.830639 |
| 155                    | 10 | 52     | -8.21  | 4.05  | 734.75      | 999.12  | 1335.81  | -865.47   | 5733.49   | 677.22 | 17.63    | 674.12 | 36.37    | 940.30  | 1196.11  | 905.39  | 1082.96 | -2000.827924 |
| 156                    | 10 | 53     | -8.12  | 4.14  | 734.75      | 1008.46 | 1189.75  | 804.25    | 2037.02   | 681.26 | 20.98    | 679.31 | 36.15    | 1043.81 | 1325.71  | 1005.37 | 1206.76 | -2000.826493 |
| 157                    | 10 | 54     | -8.06  | 4.20  | 734.75      | 1017.77 | 1231.35  | 729.99    | 1996.73   | 682.74 | 22.83    | 680.50 | 36.71    | 1058.41 | 1384.95  | 1014.97 | 1250.29 | -2000.825526 |
| 158                    | 10 | 55     | -7.96  | 4.30  | 734.75      | 1093.72 | 1620.05  | 39.82     | 3369.31   | 680.73 | 21.34    | 677.83 | 38.37    | 1038.74 | 1484.60  | 982.80  | 1305.55 | -2000.823953 |
| 159                    | 10 | 56     | -7.75  | 4.51  | 734.75      | 1076.57 | 1291.72  | -7635.08  | 23773.34  | 683.10 | 21.74    | 681.84 | 35.38    | 1114.17 | 1419.26  | 1047.38 | 1223.07 | -2000.820529 |
| 160                    | 10 | 57     | -7.72  | 4.54  | 734.75      | 1008.46 | 1201.20  | 506.50    | 1939.99   | 680.38 | 19.92    | 677.93 | 34.98    | 1025.91 | 1301.47  | 979.63  | 1171.80 | -2000.820091 |
| 161                    | 10 | 58     | -7.48  | 4.78  | 734.75      | 1011.04 | 1105.26  | 778.88    | 3007.56   | 680.13 | 18.31    | 677.98 | 31.71    | 1004.19 | 1160.64  | 958.17  | 1035.29 | -2000.816297 |
| 162                    | 10 | 59     | -7.47  | 4.79  | 734.75      | 1111.32 | 1535.22  | -699.47   | 2750.44   | 680.84 | 19.77    | 678.63 | 36.02    | 1112.71 | 1578.41  | 1047.42 | 1389.70 | -2000.816186 |
| 163                    | 10 | 60     | -7.39  | 4.87  | 734.75      | 1078.75 | 946.32   | -727.78   | 1142.99   | 679.12 | 12.32    | 678.17 | 27.40    | 1046.27 | 919.19   | 1008.33 | 852.34  | -2000.814879 |
| 164                    | 10 | 61     | -7.28  | 4.98  | 734.75      | 1144.14 | 1411.26  | -763.78   | 714.09    | 681.52 | 17.64    | 680.06 | 32.31    | 1117.56 | 1398.12  | 1058.62 | 1239.80 | -2000.813077 |
| 165                    | 10 | 62     | -6.72  | 5.54  | 734.75      | 1179.01 | 1596.20  | 2309.86   | 5899.79   | 684.25 | 22.42    | 683.33 | 37.29    | 1196.48 | 1698.69  | 1116.70 | 1482.14 | -2000.804205 |
| 166                    | 10 | 63     | -6.25  | 6.01  | 734.75      | 1353.12 | 2136.35  | 3477.77   | 14717.35  | 687.29 | 24.62    | 685.71 | 37.96    | 1317.02 | 2092.17  | 1164.64 | 1661.99 | -2000.796665 |
| 167                    | 11 | 1*     | -12.12 | 0.00  | 808.23      | 730.37  | 299.49   | 2512.16   | 4302.59   | 728.62 | 4.82     | 718.72 | 13.29    | 682.42  | 332.23   | 685.24  | 311.34  | -2200.979169 |
| 168                    | 11 | 2      | -11.75 | 0.37  | 808.23      | 802.70  | 448.39   | 540.17    | 2101.63   | 730.92 | 6.99     | 722.69 | 15.11    | 739.94  | 422.33   | 747.16  | 416.52  | -2200.972785 |
| 169                    | 11 | 3      | -11.69 | 0.43  | 808.23      | 785.76  | 347.71   | 1045.58   | 3248.36   | 730.43 | 5.47     | 722.10 | 12.09    | 722.90  | 307.07   | 727.67  | 289.30  | -2200.971643 |
| 170                    | 11 | 4      | -11.66 | 0.46  | 808.23      | 737.70  | 257.02   | 1693.04   | 1327.52   | 728.83 | 3.91     | 719.32 | 10.65    | 688.20  | 255.07   | 689.10  | 227.92  | -2200.971201 |
| 171                    | 11 | 5      | -11.62 | 0.50  | 808.23      | 744.76  | 318.50   | 364.65    | 1927.60   | 729.04 | 5.19     | 719.64 | 14.09    | 701.37  | 340.55   | 708.56  | 328.75  | -2200.970553 |
| 172                    | 11 | 6      | -11.38 | 0.74  | 808.23      | 741.20  | 343.86   | -19049.34 | 59724.06  | 729.14 | 5.92     | 719.81 | 16.18    | 692.53  | 350.51   | 699.22  | 345.72  | -2200.966341 |
| 173                    | 11 | 7      | -11.37 | 0.75  | 808.23      | 762.65  | 343.91   | 1533.83   | 3549.60   | 729.79 | 6.19     | 721.00 | 15.60    | 706.88  | 334.02   | 715.18  | 331.35  | -2200.966049 |
| 174                    | 11 | 8      | -11.36 | 0.76  | 808.23      | 755.00  | 259.23   | 639.90    | 1177.06   | 729.62 | 4.21     | 720.92 | 9.94     | 685.51  | 214.59   | 693.05  | 186.89  | -2200.965980 |
| 175                    | 11 | 9      | -11.29 | 0.83  | 808.23      | 736.33  | 289.25   | -1017.23  | 3907.89   | 728.64 | 4.98     | 718.73 | 14.27    | 692.49  | 287.47   | 698.64  | 281.54  | -2200.964741 |
| 176                    | 11 | 10     | -11.18 | 0.94  | 808.23      | 769.30  | 259.54   | -1034.60  | 16089.05  | 729.69 | 3.65     | 721.42 | 9.95     | 740.55  | 253.35   | 744.54  | 227.04  | -2200.962744 |
| 177                    | 11 | 11     | -11.14 | 0.98  | 808.23      | 751.51  | 363.92   | 3380.30   | 7779.63   | 729.60 | 7.26     | 720.59 | 19.37    | 717.20  | 386.87   | 723.82  | 394.07  | -2200.962013 |
| 178                    | 11 | 12     | -11.05 | 1.07  | 808.23      | 757.72  | 308.66   | 2839.10   | 3831.78   | 729.38 | 5.57     | 720.36 | 15.15    | 715.13  | 311.26   | 721.20  | 306.53  | -2200.960516 |
| 179                    | 11 | 13     | -10.98 | 1.14  | 808.23      | 773.30  | 309.63   | -1139.16  | 5086.11   | 730.03 | 5.49     | 721.96 | 14.61    | 744.12  | 309.01   | 747.42  | 295.89  | -2200.959324 |
| 180                    | 11 | 14     | -10.95 | 1.17  | 808.23      | 754.94  | 372.71   | 975.45    | 1768.80   | 729.60 | 7.11     | 720.67 | 19.07    | 716.95  | 388.07   | 723.21  | 394.72  | -2200.958725 |
| 181                    | 11 | 15     | -10.87 | 1.25  | 808.23      | 715.03  | 393.12   | 1122.91   | 873.24    | 729.34 | 7.37     | 720.29 | 21.03    | 680.04  | 368.32   | 676.58  | 349.27  | -2200.957278 |
| 182                    | 11 | 16     | -10.80 | 1.32  | 808.23      | 858.82  | 413.89   | -2160.88  | 2362.54   | 732.77 | 6.44     | 726.85 | 12.94    | 839.47  | 422.90   | 846.54  | 411.49  | -2200.956095 |
| 183                    | 11 | 17     | -10.72 | 1.40  | 808.23      | 755.60  | 467.82   | 1048.35   | 476.07    | 729.78 | 8.86     | 720.89 | 24.96    | 722.43  | 466.21   | 720.54  | 449.50  | -2200.954692 |
| 184                    | 11 | 18     | -10.64 | 1.48  | 808.23      | 769.48  | 291.30   | 1245.86   | 1646.11   | 729.91 | 5.29     | 721.90 | 14.31    | 731.71  | 285.45   | 743.11  | 285.13  | -2200.953208 |
| 185                    | 11 | 19     | -10.57 | 1.55  | 808.23      | 756.52  | 467.77   | 1549.39   | 1893.72   | 730.60 | 8.93     | 722.73 | 23.98    | 717.87  | 440.74   | 720.25  | 438.05  | -2200.952052 |
| 186                    | 11 | 20     | -10.53 | 1.59  | 808.23      | 739.87  | 390.81   | 1691.23   | 1363.61   | 730.07 | 7.65     | 722.03 | 22.15    | 706.21  | 375.48   | 705.74  | 356.83  | -2200.951423 |
| 187                    | 11 | 21     | -10.53 | 1.59  | 808.23      | 745.20  | 371.99   | -44890.96 | 139051.65 | 730.40 | 7.59     | 722.84 | 21.61    | 710.37  | 346.99   | 712.13  | 335.06  | -2200.951349 |
| 188                    | 11 | 22     | -10.46 | 1.66  | 808.23      | 774.98  | 460.68   | 2229.91   | 3875.38   | 730.38 | 8.64     | 722.35 | 23.83    | 746.13  | 456.62   | 742.61  | 430.59  | -2200.953094 |
| 189                    | 11 | 23     | -10.43 | 1.69  | 808.23      | 803.11  | 473.80   | 1892.34   | 11558.48  | 731.13 | 8.83     | 723.91 | 23.57    | 774.51  | 475.86   | 771.33  | 453.10  | -2200.949547 |
| 190                    | 11 | 24     | -10.41 | 1.71  | 808.23      | 763.10  | 474.53   | 699.35    | 1318.75   | 730.05 | 8.51     | 721.76 | 23.45    | 728.17  | 474.95   | 724.43  | 456.15  | -2200.949192 |
| 191                    | 11 | 25     | -10.39 | 1.73  | 808.23      | 786.03  | 502.91   | 18029.74  | 49658.02  | 730.68 | 9.35     | 722.82 | 25.57    | 751.21  | 502.02   | 748.01  | 480.08  | -2200.948905 |
| 192                    | 11 | 26     | -10.39 | 1.73  | 808.23      | 778.06  | 436.10   | 2995.77   | 5897.16   | 730.95 | 8.67     | 723.67 | 23.44    | 738.72  | 417.48   | 739.50  | 405.68  | -2200.948903 |
| 193                    | 11 | 27     | -10.32 | 1.80  | 808.23      | 801.69  | 488.05   | 6385.69   | 15560.52  | 731.20 | 9.18     | 724.04 | 24.47    | 775.62  | 489.97   | 770.17  | 462.76  | -2200.947679 |
| 194                    | 11 | 28     | -10.27 | 1.85  | 808.23      | 774.41  | 379.68   | 1593.58   | 1614.50   | 730.44 | 7.71     | 722.73 | 20.64    | 730.98  | 388.99   | 729.21  | 381.95  | -2200.946740 |
| 195                    | 11 | 29     | -10.19 | 1.93  | 808.23      | 801.70  | 412.95   | 1214.41   | 4028.04   | 730.41 | 6.92     | 722.80 | 19.96    | 772.26  | 417.61   | 761.89  | 393.99  | -2200.945397 |

| Polarizability models: |    |        |        |      | n*alp<br>Aiso | DFT results |         | AM model  |           | TL model |        | TE model |        | RP model |         | GD model |         | Etot         |
|------------------------|----|--------|--------|------|---------------|-------------|---------|-----------|-----------|----------|--------|----------|--------|----------|---------|----------|---------|--------------|
| i                      | n  | isomer | Eb     | Erel |               | Aiso        | Aaniso  | Aiso      | Aaniso    | Aiso     | Aaniso | Aiso     | Aaniso | Aiso     | Aaniso  | Aiso     | Aaniso  |              |
| 196                    | 11 | 30     | -10.18 | 1.94 | 808.23        | 811.71      | 478.99  | 47163.85  | 136243.69 | 730.99   | 8.12   | 723.81   | 22.25  | 781.79   | 473.34  | 774.13   | 441.28  | -2200.945197 |
| 197                    | 11 | 31     | -10.18 | 1.94 | 808.23        | 820.48      | 487.65  | -16918.07 | 56879.88  | 731.90   | 9.56   | 725.51   | 24.60  | 799.44   | 493.26  | 793.23   | 464.90  | -2200.945192 |
| 198                    | 11 | 32     | -10.16 | 1.96 | 808.23        | 766.22      | 404.19  | 711.56    | 3242.27   | 730.80   | 8.63   | 723.51   | 23.69  | 748.17   | 415.50  | 744.14   | 384.87  | -2200.944921 |
| 199                    | 11 | 33     | -10.16 | 1.96 | 808.23        | 797.39      | 413.38  | 2106.08   | 2041.30   | 730.32   | 7.08   | 722.56   | 20.55  | 767.05   | 416.93  | 756.84   | 392.78  | -2200.944805 |
| 200                    | 11 | 34     | -10.13 | 1.99 | 808.23        | 796.49      | 506.34  | 134.04    | 3906.70   | 731.38   | 10.40  | 724.28   | 27.04  | 771.42   | 525.76  | 764.76   | 500.31  | -2200.944316 |
| 201                    | 11 | 35     | -10.09 | 2.03 | 808.23        | 823.24      | 549.93  | -5407.66  | 21169.56  | 732.38   | 10.78  | 726.35   | 27.47  | 799.88   | 566.19  | 797.39   | 550.97  | -2200.943623 |
| 202                    | 11 | 36     | -10.07 | 2.05 | 808.23        | 871.60      | 624.47  | -341.07   | 1566.91   | 733.50   | 9.58   | 727.90   | 21.74  | 815.08   | 549.08  | 809.28   | 529.79  | -2200.943252 |
| 203                    | 11 | 37     | -10.05 | 2.07 | 808.23        | 834.01      | 515.62  | 3563.80   | 6866.03   | 732.38   | 10.33  | 726.32   | 25.94  | 811.86   | 521.25  | 804.28   | 491.84  | -2200.942870 |
| 204                    | 11 | 38     | -10.02 | 2.10 | 808.23        | 816.74      | 551.29  | -4059.45  | 15737.15  | 731.89   | 10.95  | 725.10   | 27.95  | 785.66   | 547.55  | 778.04   | 517.63  | -2200.942491 |
| 205                    | 11 | 39     | -9.98  | 2.14 | 808.23        | 826.73      | 503.87  | -1042.59  | 3239.05   | 731.79   | 9.08   | 725.42   | 23.80  | 804.90   | 499.98  | 794.96   | 463.29  | -2200.941653 |
| 206                    | 11 | 40     | -9.97  | 2.15 | 808.23        | 817.80      | 429.33  | 1647.87   | 5849.99   | 730.98   | 7.21   | 724.04   | 20.27  | 791.39   | 405.26  | 780.24   | 376.68  | -2200.941612 |
| 207                    | 11 | 41     | -9.93  | 2.19 | 808.23        | 816.15      | 551.39  | -21937.84 | 68930.97  | 732.35   | 11.07  | 726.47   | 29.88  | 791.80   | 539.59  | 786.95   | 507.96  | -2200.940797 |
| 208                    | 11 | 42     | -9.92  | 2.20 | 808.23        | 930.67      | 955.11  | 471.09    | 1321.82   | 736.38   | 15.12  | 730.71   | 27.53  | 876.12   | 879.87  | 855.52   | 804.12  | -2200.940623 |
| 209                    | 11 | 43     | -9.90  | 2.22 | 808.23        | 822.87      | 568.36  | 1905.83   | 1925.74   | 732.07   | 10.96  | 725.77   | 29.39  | 796.88   | 578.70  | 786.17   | 543.60  | -2200.940326 |
| 210                    | 11 | 44     | -9.84  | 2.28 | 808.23        | 886.57      | 739.93  | -1594.58  | 5745.51   | 733.08   | 11.29  | 726.69   | 26.03  | 844.60   | 698.82  | 829.77   | 639.32  | -2200.939320 |
| 211                    | 11 | 45     | -9.81  | 2.31 | 808.23        | 824.62      | 474.51  | -3127.37  | 13340.80  | 732.32   | 10.34  | 726.28   | 25.42  | 793.35   | 469.32  | 785.46   | 442.73  | -2200.938732 |
| 212                    | 11 | 46     | -9.79  | 2.33 | 808.23        | 881.93      | 485.91  | 2316.48   | 5412.48   | 733.10   | 8.04   | 727.52   | 19.72  | 858.43   | 498.80  | 848.17   | 480.40  | -2200.938458 |
| 213                    | 11 | 47     | -9.77  | 2.35 | 808.23        | 874.98      | 740.12  | 985.63    | 2080.27   | 732.82   | 11.90  | 726.35   | 29.00  | 835.25   | 723.86  | 824.26   | 688.55  | -2200.938107 |
| 214                    | 11 | 48     | -9.75  | 2.37 | 808.23        | 844.65      | 681.84  | -309.63   | 5328.93   | 732.84   | 13.07  | 726.61   | 32.08  | 819.76   | 695.14  | 805.15   | 647.27  | -2200.937683 |
| 215                    | 11 | 49     | -9.74  | 2.38 | 808.23        | 883.05      | 494.26  | 110.47    | 3889.38   | 733.16   | 8.27   | 727.64   | 20.47  | 860.87   | 507.50  | 850.24   | 487.87  | -2200.937580 |
| 216                    | 11 | 50     | -9.72  | 2.40 | 808.23        | 837.31      | 593.64  | -72.65    | 3504.48   | 733.03   | 12.51  | 727.25   | 29.84  | 819.40   | 614.69  | 811.49   | 588.91  | -2200.937102 |
| 217                    | 11 | 51     | -9.70  | 2.42 | 808.23        | 854.09      | 528.88  | -381.55   | 2988.59   | 733.11   | 11.00  | 727.76   | 27.07  | 832.31   | 545.77  | 823.48   | 514.88  | -2200.936849 |
| 218                    | 11 | 52     | -9.70  | 2.42 | 808.23        | 870.62      | 815.09  | -4542.98  | 16535.77  | 733.43   | 14.25  | 727.57   | 34.14  | 838.62   | 810.25  | 819.16   | 741.65  | -2200.936791 |
| 219                    | 11 | 53     | -9.69  | 2.43 | 808.23        | 902.17      | 804.20  | -6991.82  | 22584.46  | 732.98   | 12.60  | 726.50   | 29.41  | 844.90   | 762.25  | 825.96   | 701.28  | -2200.936572 |
| 220                    | 11 | 54     | -9.67  | 2.45 | 808.23        | 891.01      | 951.52  | 1414.42   | 1939.31   | 734.99   | 17.44  | 729.65   | 39.93  | 864.57   | 930.64  | 841.21   | 843.93  | -2200.936305 |
| 221                    | 11 | 55     | -9.65  | 2.47 | 808.23        | 857.90      | 629.07  | 2768.71   | 4439.84   | 733.52   | 12.88  | 728.11   | 30.82  | 840.31   | 650.21  | 829.28   | 615.34  | -2200.936014 |
| 222                    | 11 | 56     | -9.56  | 2.56 | 808.23        | 908.66      | 815.76  | -1792.46  | 8520.66   | 734.10   | 13.33  | 728.43   | 29.76  | 870.79   | 801.15  | 852.90   | 745.38  | -2200.934422 |
| 223                    | 11 | 57     | -9.40  | 2.72 | 808.23        | 941.80      | 951.40  | -223.02   | 3714.94   | 735.36   | 15.80  | 730.38   | 34.20  | 908.09   | 934.25  | 888.74   | 870.25  | -2200.931479 |
| 224                    | 11 | 58     | -9.34  | 2.78 | 808.23        | 1000.01     | 1004.79 | 273.71    | 2723.70   | 737.40   | 15.50  | 732.80   | 28.67  | 972.44   | 993.14  | 947.19   | 902.99  | -2200.930545 |
| 225                    | 11 | 59     | -9.34  | 2.78 | 808.23        | 897.92      | 827.48  | -3445.05  | 15094.42  | 735.86   | 16.17  | 732.04   | 37.10  | 856.52   | 775.77  | 852.23   | 730.08  | -2200.930488 |
| 226                    | 11 | 60     | -9.29  | 2.83 | 808.23        | 912.98      | 766.14  | 3454.48   | 9335.78   | 734.28   | 12.65  | 729.31   | 30.90  | 876.35   | 743.46  | 853.11   | 680.98  | -2200.929657 |
| 227                    | 11 | 61     | -9.29  | 2.83 | 808.23        | 938.96      | 844.34  | 187.54    | 3288.09   | 734.84   | 13.75  | 729.73   | 30.62  | 896.89   | 804.87  | 874.51   | 741.50  | -2200.929601 |
| 228                    | 11 | 62     | -9.26  | 2.86 | 808.23        | 870.21      | 631.16  | 598.43    | 6980.83   | 733.38   | 12.25  | 728.38   | 30.26  | 859.10   | 657.36  | 842.12   | 609.15  | -2200.929151 |
| 229                    | 11 | 63     | -9.26  | 2.86 | 808.23        | 957.08      | 715.31  | 1891.02   | 6571.44   | 735.03   | 11.34  | 730.51   | 24.22  | 924.63   | 731.18  | 915.47   | 713.71  | -2200.929096 |
| 230                    | 11 | 64     | -8.98  | 3.14 | 808.23        | 976.72      | 825.81  | 2866.39   | 8340.38   | 736.47   | 13.35  | 732.81   | 29.83  | 949.30   | 825.95  | 922.67   | 755.66  | -2200.924178 |
| 231                    | 11 | 65     | -8.79  | 3.33 | 808.23        | 1052.68     | 1292.98 | -2071.14  | 7949.74   | 737.31   | 18.49  | 733.35   | 38.48  | 980.01   | 1171.01 | 947.46   | 1065.30 | -2200.920944 |
| 232                    | 11 | 66     | -8.41  | 3.71 | 808.23        | 1139.88     | 1321.73 | -1298.73  | 3179.71   | 741.65   | 19.57  | 738.99   | 34.99  | 1103.97  | 1293.81 | 1063.24  | 1169.02 | -2200.914179 |
| 233                    | 11 | 67     | -8.35  | 3.77 | 808.23        | 1085.70     | 1131.34 | 617.36    | 4111.00   | 742.32   | 21.01  | 739.94   | 34.51  | 1097.26  | 1220.65 | 1058.11  | 1111.59 | -2200.913080 |
| 234                    | 11 | 68     | -8.33  | 3.79 | 808.23        | 1154.70     | 1490.40 | 544.96    | 1116.98   | 741.41   | 20.72  | 738.49   | 37.32  | 1121.50  | 1429.21 | 1066.24  | 1258.44 | -2200.912731 |
| 235                    | 12 | 1*     | -12.02 | 0.00 | 881.70        | 795.78      | 369.70  | 2593.20   | 4538.64   | 789.44   | 8.13   | 780.49   | 20.69  | 746.01   | 360.50  | 752.91   | 360.23  | -2401.066331 |
| 236                    | 12 | 2      | -11.88 | 0.14 | 881.70        | 798.05      | 380.02  | 1018.38   | 1199.72   | 788.62   | 7.46   | 778.99   | 20.06  | 751.27   | 401.17  | 752.29   | 382.83  | -2401.063762 |
| 237                    | 12 | 3      | -11.87 | 0.15 | 881.70        | 782.02      | 307.94  | 3524.06   | 7657.26   | 789.02   | 6.98   | 779.95   | 18.59  | 736.59   | 306.70  | 743.51   | 290.15  | -2401.063484 |
| 238                    | 12 | 4      | -11.77 | 0.25 | 881.70        | 787.86      | 301.90  | 2630.81   | 3954.54   | 788.69   | 6.21   | 779.30   | 16.67  | 745.97   | 300.15  | 745.25   | 271.73  | -2401.061643 |
| 239                    | 12 | 5      | -11.76 | 0.26 | 881.70        | 767.98      | 346.06  | 2184.11   | 3254.78   | 788.21   | 7.40   | 778.07   | 20.56  | 709.74   | 346.15  | 716.32   | 341.65  | -2401.061334 |
| 240                    | 12 | 6      | -11.75 | 0.27 | 881.70        | 840.14      | 423.28  | -1041.25  | 7476.18   | 790.09   | 8.46   | 781.76   | 20.82  | 783.10   | 414.92  | 787.74   | 402.29  | -2401.061262 |
| 241                    | 12 | 7      | -11.74 | 0.28 | 881.70        | 782.17      | 351.78  | 8014.20   | 14961.08  | 788.71   | 7.76   | 779.16   | 21.05  | 734.93   | 352.27  | 739.15   | 346.84  | -2401.061060 |
| 242                    | 12 | 8      | -11.73 | 0.29 | 881.70        | 834.63      | 446.45  | 7798.99   | 20037.16  | 789.65   | 8.48   | 781.01   | 21.40  | 780.84   | 473.19  | 780.77   | 448.62  | -2401.060746 |
| 243                    | 12 | 9      | -11.65 | 0.37 | 881.70        | 826.65      | 369.95  | 26031.20  | 73198.86  | 789.78   | 7.54   | 781.38   | 18.72  | 772.39   | 356.81  | 776.55   | 341.45  | -2401.059249 |
| 244                    | 12 | 10     | -11.60 | 0.42 | 881.70        | 883.22      | 334.15  | 1564.89   | 6937.12   | 790.78   | 5.73   | 783.25   | 13.78  | 826.85   | 325.01  | 823.33   | 306.96  | -2401.058340 |
| 245                    | 12 | 11     | -11.57 | 0.45 | 881.70        | 834.79      | 288.07  | 3045.01   | 3934.94   | 789.04   | 4.88   | 780.26   | 13.25  | 792.89   | 321.37  | 785.08   | 296.40  | -2401.057710 |
| 246                    | 12 | 12     | -11.56 | 0.46 | 881.70        | 929.51      | 779.03  | 39.44     | 3205.27   | 792.21   | 12.54  | 784.74   | 27.25  | 876.61   | 792.05  | 861.54   | 717.98  | -2401.057585 |



| Polarizability models: |    |        |        |      | n*alp  | DFT results |         | AM model  |           | TL model |       | TE model |       | RP model |        | GD model |        | Etot         |
|------------------------|----|--------|--------|------|--------|-------------|---------|-----------|-----------|----------|-------|----------|-------|----------|--------|----------|--------|--------------|
| i                      | n  | isomer | Eb     | Erel | Aiso   | Aaiso       | Aaiso   | Aaiso     | Aaiso     | Aaiso    | Aaiso | Aaiso    | Aaiso | Aaiso    | Aaiso  | Aaiso    | Aaiso  |              |
| 247                    | 12 | 13     | -11.53 | 0.49 | 881.70 | 828.06      | 389.35  | 3567.01   | 6343.23   | 789.65   | 7.69  | 781.14   | 19.36 | 772.29   | 391.12 | 773.56   | 369.51 | -2401.056938 |
| 248                    | 12 | 14     | -11.52 | 0.50 | 881.70 | 837.48      | 441.08  | 3058.10   | 5124.37   | 790.01   | 8.60  | 781.76   | 21.42 | 785.74   | 447.98 | 786.29   | 428.53 | -2401.056853 |
| 249                    | 12 | 15     | -11.50 | 0.52 | 881.70 | 839.14      | 398.31  | 4309.38   | 7113.76   | 789.48   | 6.92  | 780.91   | 18.04 | 794.39   | 399.62 | 792.75   | 372.92 | -2401.056377 |
| 250                    | 12 | 16     | -11.48 | 0.54 | 881.70 | 818.90      | 365.58  | 4462.49   | 5298.83   | 789.09   | 6.94  | 780.25   | 18.44 | 775.88   | 379.90 | 779.61   | 359.97 | -2401.055959 |
| 251                    | 12 | 17     | -11.47 | 0.55 | 881.70 | 834.54      | 387.27  | 397.99    | 2454.93   | 789.60   | 7.80  | 780.98   | 20.06 | 792.59   | 413.03 | 795.21   | 395.47 | -2401.055867 |
| 252                    | 12 | 18     | -11.46 | 0.56 | 881.70 | 800.39      | 458.62  | 26419.77  | 76808.45  | 789.11   | 9.34  | 779.84   | 24.71 | 743.58   | 479.41 | 750.35   | 480.70 | -2401.055562 |
| 253                    | 12 | 19     | -11.42 | 0.60 | 881.70 | 839.76      | 400.73  | 34870.78  | 101818.68 | 789.92   | 8.52  | 781.51   | 21.56 | 803.90   | 418.75 | 807.61   | 407.27 | -2401.054945 |
| 254                    | 12 | 20     | -11.42 | 0.60 | 881.70 | 785.81      | 288.11  | 1847.15   | 2919.72   | 788.64   | 6.33  | 779.23   | 17.78 | 751.64   | 286.33 | 757.69   | 273.65 | -2401.054857 |
| 255                    | 12 | 21     | -11.41 | 0.61 | 881.70 | 823.62      | 420.25  | -28481.21 | 88176.29  | 789.77   | 9.33  | 781.13   | 23.64 | 776.45   | 430.25 | 781.38   | 426.73 | -2401.054615 |
| 256                    | 12 | 22     | -11.40 | 0.62 | 881.70 | 814.68      | 360.13  | 2555.56   | 5245.56   | 789.01   | 7.31  | 779.87   | 19.59 | 774.92   | 364.95 | 779.01   | 348.42 | -2401.054506 |
| 257                    | 12 | 23     | -11.40 | 0.62 | 881.70 | 812.29      | 347.13  | 2686.10   | 4551.01   | 788.96   | 7.36  | 779.74   | 19.77 | 779.12   | 355.68 | 782.55   | 344.27 | -2401.054459 |
| 258                    | 12 | 24     | -11.39 | 0.63 | 881.70 | 817.73      | 422.51  | 3296.11   | 7448.36   | 789.24   | 8.43  | 780.27   | 22.12 | 776.58   | 444.11 | 782.21   | 437.52 | -2401.054390 |
| 259                    | 12 | 25     | -11.39 | 0.63 | 881.70 | 847.55      | 287.27  | 1023.76   | 114.66    | 789.18   | 4.45  | 780.69   | 12.08 | 809.70   | 304.68 | 806.14   | 282.08 | -2401.054240 |
| 260                    | 12 | 26     | -11.36 | 0.66 | 881.70 | 833.34      | 400.73  | 14034.74  | 33773.45  | 789.66   | 7.40  | 781.24   | 19.49 | 789.88   | 386.03 | 792.55   | 373.49 | -2401.053700 |
| 261                    | 12 | 27     | -11.33 | 0.69 | 881.70 | 834.89      | 408.24  | 257.79    | 6423.24   | 789.43   | 7.36  | 780.77   | 19.39 | 790.00   | 422.10 | 791.90   | 405.21 | -2401.053071 |
| 262                    | 12 | 28     | -11.31 | 0.71 | 881.70 | 784.21      | 394.43  | 3080.40   | 6226.92   | 788.56   | 8.26  | 778.76   | 22.18 | 720.46   | 384.75 | 727.68   | 384.02 | -2401.052825 |
| 263                    | 12 | 29     | -11.28 | 0.74 | 881.70 | 835.72      | 375.75  | 2908.37   | 5043.91   | 789.75   | 7.72  | 781.42   | 20.08 | 800.95   | 385.46 | 802.12   | 365.21 | -2401.052191 |
| 264                    | 12 | 30     | -11.27 | 0.75 | 881.70 | 812.15      | 438.94  | -10216.96 | 33891.12  | 789.53   | 9.68  | 780.65   | 25.39 | 777.74   | 453.61 | 781.41   | 451.44 | -2401.052099 |
| 265                    | 12 | 31     | -11.27 | 0.75 | 881.70 | 825.07      | 408.48  | 655.62    | 1490.26   | 789.23   | 8.31  | 780.09   | 22.16 | 780.85   | 421.11 | 783.85   | 409.16 | -2401.052001 |
| 266                    | 12 | 32     | -11.27 | 0.75 | 881.70 | 824.49      | 457.93  | -5780.63  | 20404.49  | 789.58   | 9.04  | 780.84   | 23.41 | 776.32   | 463.35 | 779.06   | 452.77 | -2401.051954 |
| 267                    | 12 | 33     | -11.27 | 0.75 | 881.70 | 804.54      | 445.68  | 15.25     | 3721.78   | 789.13   | 9.09  | 779.90   | 23.90 | 752.11   | 442.29 | 757.64   | 442.39 | -2401.051950 |
| 268                    | 12 | 34     | -11.26 | 0.76 | 881.70 | 961.72      | 434.37  | -297.14   | 2521.47   | 793.34   | 7.12  | 787.46   | 15.01 | 886.59   | 400.36 | 887.44   | 389.53 | -2401.051860 |
| 269                    | 12 | 35     | -11.25 | 0.77 | 881.70 | 910.36      | 400.51  | 818.13    | 2763.75   | 791.59   | 6.62  | 784.53   | 14.42 | 852.95   | 396.80 | 849.43   | 384.50 | -2401.051624 |
| 270                    | 12 | 36     | -11.22 | 0.80 | 881.70 | 842.20      | 233.76  | 3989.03   | 4477.58   | 789.28   | 3.72  | 780.94   | 10.15 | 798.79   | 227.53 | 790.99   | 197.71 | -2401.051098 |
| 271                    | 12 | 37     | -11.21 | 0.81 | 881.70 | 952.27      | 516.49  | 454.66    | 3196.22   | 793.04   | 8.26  | 786.98   | 16.89 | 876.52   | 453.01 | 874.88   | 424.65 | -2401.050853 |
| 272                    | 12 | 38     | -11.19 | 0.83 | 881.70 | 920.50      | 680.05  | 574.46    | 6932.76   | 791.61   | 10.37 | 784.38   | 23.32 | 850.52   | 605.46 | 840.46   | 548.21 | -2401.050506 |
| 273                    | 12 | 39     | -11.19 | 0.83 | 881.70 | 845.97      | 407.08  | -2318.01  | 10129.86  | 790.07   | 8.53  | 781.92   | 21.96 | 812.43   | 417.43 | 815.04   | 405.75 | -2401.050498 |
| 274                    | 12 | 40     | -11.19 | 0.83 | 881.70 | 1048.01     | 1057.42 | 673.23    | 1786.80   | 797.25   | 17.27 | 790.84   | 28.25 | 971.77   | 999.58 | 961.45   | 938.04 | -2401.050470 |
| 275                    | 12 | 41     | -11.17 | 0.85 | 881.70 | 917.46      | 553.58  | -548.07   | 3049.39   | 792.06   | 9.01  | 785.28   | 20.04 | 842.06   | 494.10 | 839.56   | 465.16 | -2401.050179 |
| 276                    | 12 | 42     | -11.17 | 0.85 | 881.70 | 847.12      | 368.42  | -7754.18  | 29643.22  | 789.90   | 7.47  | 781.81   | 19.34 | 814.11   | 369.84 | 817.60   | 352.77 | -2401.050046 |
| 277                    | 12 | 43     | -11.16 | 0.86 | 881.70 | 796.95      | 311.32  | 1190.42   | 1628.97   | 789.01   | 7.23  | 779.91   | 19.30 | 768.45   | 334.31 | 773.70   | 318.14 | -2401.049983 |
| 278                    | 12 | 44     | -11.16 | 0.86 | 881.70 | 927.66      | 700.60  | 998.57    | 1772.52   | 792.38   | 11.73 | 785.27   | 25.61 | 876.58   | 701.83 | 877.66   | 671.84 | -2401.049971 |
| 279                    | 12 | 45     | -11.16 | 0.86 | 881.70 | 858.87      | 322.41  | 518.66    | 3082.98   | 790.10   | 5.51  | 782.24   | 13.57 | 799.53   | 316.72 | 794.50   | 293.76 | -2401.049949 |
| 280                    | 12 | 46     | -11.15 | 0.87 | 881.70 | 822.19      | 313.09  | 298.67    | 325.16    | 788.45   | 6.11  | 778.75   | 17.71 | 775.12   | 330.47 | 775.97   | 327.05 | -2401.049784 |
| 281                    | 12 | 47     | -11.13 | 0.89 | 881.70 | 845.27      | 401.40  | 23554.17  | 69211.34  | 789.86   | 8.07  | 781.63   | 21.26 | 811.42   | 408.18 | 812.13   | 394.81 | -2401.049397 |
| 282                    | 12 | 48     | -11.10 | 0.92 | 881.70 | 843.81      | 345.16  | 2415.72   | 7039.00   | 789.32   | 6.17  | 780.66   | 16.47 | 804.74   | 343.78 | 803.91   | 319.75 | -2401.048791 |
| 283                    | 12 | 49     | -11.10 | 0.92 | 881.70 | 884.27      | 312.61  | -8572.12  | 26651.29  | 790.81   | 5.15  | 783.63   | 12.69 | 830.32   | 300.95 | 830.18   | 277.59 | -2401.048744 |
| 284                    | 12 | 50     | -11.09 | 0.93 | 881.70 | 1013.90     | 905.36  | 1275.69   | 2876.50   | 796.26   | 15.21 | 790.01   | 25.33 | 938.09   | 833.75 | 921.33   | 747.56 | -2401.048601 |
| 285                    | 12 | 51     | -11.09 | 0.93 | 881.70 | 849.51      | 411.59  | 3038.02   | 3207.67   | 789.78   | 7.74  | 781.43   | 20.09 | 810.28   | 422.69 | 811.44   | 406.45 | -2401.048595 |
| 286                    | 12 | 52     | -11.08 | 0.94 | 881.70 | 847.45      | 285.69  | -38.61    | 5426.19   | 789.71   | 4.99  | 781.75   | 13.43 | 809.75   | 300.41 | 804.91   | 280.69 | -2401.048396 |
| 287                    | 12 | 53     | -11.08 | 0.94 | 881.70 | 845.48      | 500.13  | -505.15   | 4520.36   | 790.34   | 10.40 | 782.19   | 26.33 | 813.44   | 527.69 | 817.87   | 527.70 | -2401.048347 |
| 288                    | 12 | 54     | -11.05 | 0.97 | 881.70 | 826.15      | 440.27  | 3154.00   | 6210.29   | 789.93   | 9.96  | 781.44   | 26.01 | 787.35   | 427.48 | 788.45   | 417.84 | -2401.047778 |
| 289                    | 12 | 55     | -11.04 | 0.98 | 881.70 | 818.67      | 445.52  | 1070.12   | 529.51    | 789.81   | 9.43  | 781.50   | 26.62 | 778.27   | 424.94 | 779.81   | 417.77 | -2401.047698 |
| 290                    | 12 | 56     | -11.04 | 0.98 | 881.70 | 835.77      | 352.81  | 2239.56   | 3626.64   | 789.64   | 7.03  | 781.38   | 18.41 | 807.80   | 348.51 | 809.97   | 325.46 | -2401.047654 |
| 291                    | 12 | 57     | -11.04 | 0.98 | 881.70 | 860.57      | 259.13  | -5900.27  | 25661.51  | 789.76   | 4.09  | 782.06   | 11.26 | 832.54   | 258.00 | 829.09   | 233.22 | -2401.047594 |
| 292                    | 12 | 58     | -11.03 | 0.99 | 881.70 | 835.37      | 503.32  | 2437.63   | 3708.93   | 790.10   | 10.51 | 781.83   | 29.10 | 798.18   | 502.02 | 796.82   | 484.54 | -2401.047389 |
| 293                    | 12 | 59     | -11.01 | 1.01 | 881.70 | 810.29      | 477.86  | 1296.41   | 1311.32   | 789.65   | 9.24  | 781.21   | 25.93 | 767.61   | 447.90 | 762.75   | 428.13 | -2401.047004 |
| 294                    | 12 | 60     | -11.01 | 1.01 | 881.70 | 862.79      | 351.35  | -514.55   | 30538.90  | 790.10   | 6.08  | 782.56   | 15.92 | 832.09   | 339.62 | 831.90   | 307.25 | -2401.046994 |
| 295                    | 12 | 61     | -11.00 | 1.02 | 881.70 | 790.82      | 421.72  | 1561.83   | 1687.58   | 789.47   | 9.49  | 780.75   | 24.87 | 745.81   | 399.54 | 743.15   | 381.52 | -2401.046915 |
| 296                    | 12 | 62     | -11.00 | 1.02 | 881.70 | 821.23      | 490.58  | 2551.18   | 4181.13   | 790.33   | 9.93  | 782.45   | 26.90 | 778.94   | 455.37 | 779.59   | 451.59 | -2401.046844 |
| 297                    | 12 | 63     | -11.00 | 1.02 | 881.70 | 934.38      | 722.62  | 383.66    | 3236.21   | 792.57   | 11.97 | 785.53   | 26.20 | 877.09   | 709.49 | 878.05   | 689.57 | -2401.046822 |

| Polarizability models: |    |        |        |      | n*alp<br>Aiso | DFT results |        | AM model  |           | TL model |        | TE model |        | RP model |        | GD model |        | Etot         |
|------------------------|----|--------|--------|------|---------------|-------------|--------|-----------|-----------|----------|--------|----------|--------|----------|--------|----------|--------|--------------|
| i                      | n  | isomer | Eb     | Erel |               | Aiso        | Aaniso | Aiso      | Aaniso    | Aiso     | Aaniso | Aiso     | Aaniso | Aiso     | Aaniso | Aiso     | Aaniso |              |
| 298                    | 12 | 64     | -10.99 | 1.03 | 881.70        | 867.76      | 426.91 | -13857.51 | 42119.90  | 791.01   | 9.22   | 783.91   | 22.85  | 839.67   | 436.22 | 838.49   | 415.16 | -2401.046707 |
| 299                    | 12 | 65     | -10.99 | 1.03 | 881.70        | 845.08      | 470.50 | 6670.51   | 19491.98  | 790.54   | 10.71  | 782.53   | 26.54  | 809.54   | 493.53 | 810.42   | 484.65 | -2401.046676 |
| 300                    | 12 | 66     | -10.96 | 1.06 | 881.70        | 794.68      | 302.23 | 78.15     | 2335.56   | 788.67   | 6.65   | 779.37   | 18.17  | 760.70   | 309.94 | 771.33   | 296.74 | -2401.046122 |
| 301                    | 12 | 67     | -10.96 | 1.06 | 881.70        | 840.69      | 498.02 | 4560.79   | 10415.61  | 790.31   | 10.16  | 782.33   | 28.04  | 807.35   | 498.01 | 804.72   | 479.61 | -2401.046114 |
| 302                    | 12 | 68     | -10.95 | 1.07 | 881.70        | 821.38      | 356.65 | 2.76      | 3693.94   | 789.67   | 8.15   | 781.47   | 21.55  | 777.47   | 348.86 | 786.00   | 353.10 | -2401.045967 |
| 303                    | 12 | 69     | -10.93 | 1.09 | 881.70        | 809.66      | 485.82 | -2197.45  | 4516.32   | 789.56   | 10.54  | 780.62   | 27.65  | 764.06   | 480.14 | 770.39   | 488.08 | -2401.045585 |
| 304                    | 12 | 70     | -10.85 | 1.17 | 881.70        | 822.37      | 464.83 | 1616.12   | 1422.11   | 789.92   | 9.48   | 781.81   | 26.96  | 774.67   | 433.55 | 774.89   | 423.40 | -2401.044049 |
| 305                    | 12 | 71     | -10.85 | 1.17 | 881.70        | 849.14      | 408.43 | 1318.66   | 7056.72   | 790.14   | 8.91   | 782.13   | 23.74  | 811.45   | 425.84 | 811.73   | 419.01 | -2401.043935 |
| 306                    | 12 | 72     | -10.85 | 1.17 | 881.70        | 858.37      | 316.22 | 3431.21   | 4869.46   | 789.78   | 6.16   | 781.82   | 16.80  | 826.72   | 334.28 | 823.38   | 324.07 | -2401.043918 |
| 307                    | 12 | 73     | -10.84 | 1.18 | 881.70        | 851.18      | 424.58 | -15300.37 | 49319.84  | 790.54   | 9.94   | 782.71   | 24.57  | 812.20   | 441.30 | 813.28   | 437.19 | -2401.043710 |
| 308                    | 12 | 74     | -10.79 | 1.23 | 881.70        | 887.23      | 707.23 | 1808.07   | 3189.59   | 791.31   | 13.12  | 783.59   | 32.11  | 842.31   | 705.35 | 839.38   | 683.74 | -2401.042849 |
| 309                    | 12 | 75     | -10.78 | 1.24 | 881.70        | 845.53      | 441.65 | -3489.46  | 14532.66  | 790.31   | 9.81   | 782.32   | 25.09  | 806.25   | 451.83 | 806.88   | 445.33 | -2401.042624 |
| 310                    | 12 | 76     | -10.77 | 1.25 | 881.70        | 855.78      | 366.79 | 668.62    | 1625.95   | 790.30   | 7.09   | 783.01   | 18.64  | 813.23   | 350.60 | 819.29   | 344.58 | -2401.042357 |
| 311                    | 12 | 77     | -10.76 | 1.26 | 881.70        | 844.12      | 485.11 | 926.27    | 6629.10   | 790.12   | 9.52   | 782.12   | 26.97  | 810.10   | 478.40 | 804.89   | 454.99 | -2401.042327 |
| 312                    | 12 | 78     | -10.76 | 1.26 | 881.70        | 839.01      | 495.20 | -187.03   | 5553.22   | 790.74   | 10.24  | 783.43   | 28.33  | 801.66   | 490.07 | 798.18   | 470.82 | -2401.042296 |
| 313                    | 12 | 79     | -10.75 | 1.27 | 881.70        | 849.59      | 393.76 | 532.08    | 5079.35   | 790.32   | 8.27   | 782.75   | 22.30  | 812.38   | 407.47 | 815.58   | 396.72 | -2401.042046 |
| 314                    | 12 | 80     | -10.74 | 1.28 | 881.70        | 857.92      | 524.12 | -4248.08  | 24343.31  | 791.59   | 11.62  | 784.89   | 30.33  | 832.85   | 537.83 | 832.93   | 524.64 | -2401.041856 |
| 315                    | 12 | 81     | -10.73 | 1.29 | 881.70        | 834.58      | 487.86 | 1654.84   | 2149.57   | 790.48   | 10.80  | 782.76   | 29.24  | 799.93   | 479.42 | 799.42   | 468.41 | -2401.041717 |
| 316                    | 12 | 82     | -10.72 | 1.30 | 881.70        | 876.55      | 498.71 | 8854.74   | 25530.69  | 791.72   | 11.30  | 784.99   | 27.74  | 847.44   | 497.87 | 845.28   | 476.24 | -2401.041479 |
| 317                    | 12 | 83     | -10.72 | 1.30 | 881.70        | 852.98      | 508.79 | -3856.11  | 23929.26  | 791.03   | 10.56  | 783.97   | 28.84  | 822.38   | 503.55 | 817.38   | 485.59 | -2401.041459 |
| 318                    | 12 | 84     | -10.71 | 1.31 | 881.70        | 849.84      | 490.52 | 2804.04   | 4076.58   | 790.94   | 10.26  | 783.86   | 28.38  | 812.75   | 485.09 | 811.78   | 467.53 | -2401.041288 |
| 319                    | 12 | 85     | -10.70 | 1.32 | 881.70        | 948.74      | 838.52 | -50.93    | 3246.70   | 793.63   | 15.40  | 786.89   | 33.11  | 907.72   | 842.64 | 901.80   | 811.58 | -2401.041150 |
| 320                    | 12 | 86     | -10.70 | 1.32 | 881.70        | 925.16      | 405.43 | 1367.93   | 4055.86   | 792.13   | 7.21   | 785.53   | 16.71  | 882.28   | 416.70 | 885.09   | 418.19 | -2401.041061 |
| 321                    | 12 | 87     | -10.68 | 1.34 | 881.70        | 926.04      | 625.96 | 1047.72   | 6177.55   | 792.09   | 10.78  | 785.23   | 24.92  | 881.95   | 624.03 | 882.80   | 608.40 | -2401.040738 |
| 322                    | 12 | 88     | -10.64 | 1.38 | 881.70        | 863.34      | 513.96 | 548.50    | 5239.97   | 791.34   | 10.51  | 784.49   | 28.20  | 822.61   | 478.32 | 824.80   | 472.38 | -2401.039941 |
| 323                    | 12 | 89     | -10.64 | 1.38 | 881.70        | 871.93      | 539.13 | 3439.90   | 8043.71   | 791.32   | 11.41  | 784.18   | 29.88  | 836.58   | 541.28 | 831.81   | 516.29 | -2401.039874 |
| 324                    | 12 | 90     | -10.63 | 1.39 | 881.70        | 856.32      | 379.08 | -1308.09  | 7016.65   | 790.42   | 7.90   | 783.11   | 19.97  | 816.78   | 375.46 | 824.56   | 357.54 | -2401.039735 |
| 325                    | 12 | 91     | -10.63 | 1.39 | 881.70        | 855.45      | 503.63 | 2853.34   | 4374.12   | 790.88   | 11.01  | 783.40   | 28.05  | 824.93   | 504.77 | 819.10   | 475.02 | -2401.039732 |
| 326                    | 12 | 92     | -10.62 | 1.40 | 881.70        | 953.67      | 620.38 | 872.67    | 2463.23   | 793.26   | 10.25  | 787.51   | 22.22  | 924.69   | 620.23 | 921.62   | 593.93 | -2401.039566 |
| 327                    | 12 | 93     | -10.61 | 1.41 | 881.70        | 880.29      | 444.98 | 1772.07   | 3002.39   | 791.36   | 8.88   | 784.70   | 21.40  | 840.23   | 431.88 | 850.37   | 418.28 | -2401.039399 |
| 328                    | 12 | 94     | -10.61 | 1.41 | 881.70        | 862.36      | 561.08 | 5145.91   | 11525.97  | 791.46   | 11.12  | 784.55   | 29.10  | 825.27   | 551.95 | 827.24   | 548.90 | -2401.039344 |
| 329                    | 12 | 95     | -10.53 | 1.49 | 881.70        | 888.29      | 563.64 | -706.44   | 5874.91   | 792.19   | 12.50  | 785.78   | 30.20  | 869.76   | 588.76 | 866.95   | 567.14 | -2401.037824 |
| 330                    | 12 | 96     | -10.47 | 1.55 | 881.70        | 866.83      | 464.51 | -905.29   | 6584.12   | 791.43   | 11.10  | 784.58   | 27.15  | 835.88   | 486.59 | 830.78   | 468.59 | -2401.036761 |
| 331                    | 12 | 97     | -10.45 | 1.57 | 881.70        | 888.02      | 461.56 | -779.37   | 8207.73   | 792.24   | 11.22  | 786.23   | 26.75  | 864.76   | 472.49 | 861.14   | 452.14 | -2401.036408 |
| 332                    | 12 | 98     | -10.42 | 1.60 | 881.70        | 893.27      | 517.12 | -9218.25  | 32605.05  | 791.75   | 10.37  | 785.38   | 27.55  | 863.22   | 514.87 | 852.65   | 483.14 | -2401.035842 |
| 333                    | 12 | 99     | -10.41 | 1.61 | 881.70        | 917.94      | 863.74 | -4824.83  | 17711.66  | 793.04   | 17.06  | 786.35   | 40.63  | 880.27   | 849.63 | 865.04   | 786.49 | -2401.035638 |
| 334                    | 12 | 100    | -10.34 | 1.68 | 881.70        | 899.53      | 527.08 | 55181.47  | 159693.69 | 791.81   | 10.39  | 785.47   | 27.48  | 865.12   | 529.74 | 854.68   | 500.06 | --2401.03424 |
| 335                    | 12 | 101    | -10.32 | 1.70 | 881.70        | 938.47      | 913.09 | 2262.91   | 3734.58   | 794.65   | 19.11  | 788.76   | 43.39  | 908.89   | 906.02 | 894.01   | 845.67 | --2401.03384 |
| 336                    | 12 | 102    | -10.30 | 1.72 | 881.70        | 922.96      | 827.29 | 54216.24  | 159419.97 | 793.28   | 16.39  | 787.04   | 38.70  | 889.79   | 817.72 | 875.43   | 762.88 | --2401.03345 |
| 337                    | 12 | 103    | -10.29 | 1.73 | 881.70        | 934.80      | 889.86 | -62432.60 | 190541.84 | 793.99   | 17.95  | 788.01   | 41.80  | 906.37   | 882.32 | 889.87   | 817.72 | --2401.03319 |
| 338                    | 12 | 104    | -10.25 | 1.77 | 881.70        | 926.91      | 846.27 | -5341.11  | 19352.45  | 793.70   | 17.27  | 787.64   | 40.31  | 893.63   | 840.69 | 878.38   | 781.60 | --2401.03258 |
| 339                    | 12 | 105    | -10.25 | 1.77 | 881.70        | 928.47      | 557.94 | 8495.32   | 19810.86  | 792.82   | 11.09  | 787.09   | 27.75  | 893.38   | 555.01 | 883.90   | 524.53 | --2401.03246 |
| 340                    | 12 | 106    | -10.24 | 1.78 | 881.70        | 968.22      | 976.42 | -6080.43  | 21091.32  | 795.36   | 17.63  | 789.51   | 37.04  | 920.22   | 918.24 | 919.78   | 908.04 | --2401.03230 |
| 341                    | 12 | 107    | -10.22 | 1.80 | 881.70        | 899.91      | 573.68 | -142.68   | 7148.89   | 792.51   | 13.15  | 786.41   | 31.83  | 876.40   | 604.16 | 869.48   | 583.02 | --2401.03189 |
| 342                    | 12 | 108    | -10.20 | 1.82 | 881.70        | 919.21      | 605.76 | 979.61    | 8900.86   | 793.37   | 13.42  | 788.04   | 31.35  | 901.51   | 621.55 | 892.13   | 585.67 | --2401.03148 |
| 343                    | 12 | 109    | -10.16 | 1.86 | 881.70        | 919.67      | 589.68 | 5529.64   | 17335.93  | 793.27   | 12.50  | 788.18   | 30.78  | 896.50   | 600.78 | 889.88   | 586.90 | --2401.03078 |
| 344                    | 12 | 110    | -10.12 | 1.90 | 881.70        | 936.35      | 629.14 | 10327.25  | 58459.50  | 794.27   | 13.17  | 790.22   | 34.93  | 911.48   | 618.29 | 910.31   | 600.99 | --2401.03002 |
| 345                    | 12 | 111    | -10.12 | 1.90 | 881.70        | 963.96      | 826.37 | 762.69    | 1189.18   | 794.02   | 14.71  | 788.20   | 33.24  | 923.24   | 789.45 | 910.38   | 735.90 | --2401.03002 |
| 346                    | 12 | 112    | -10.07 | 1.95 | 881.70        | 1002.84     | 890.10 | -2466.88  | 6250.93   | 795.18   | 15.87  | 790.07   | 34.36  | 964.99   | 866.67 | 950.24   | 811.25 | --2401.02904 |
| 347                    | 12 | 113    | -10.06 | 1.96 | 881.70        | 967.82      | 921.00 | 105337.58 | 312124.81 | 795.74   | 19.52  | 790.81   | 42.98  | 944.96   | 922.12 | 926.78   | 851.46 | --2401.02883 |
| 348                    | 12 | 114    | -10.02 | 2.00 | 881.70        | 955.45      | 874.15 | 3290.90   | 5946.12   | 794.96   | 18.12  | 789.91   | 40.83  | 929.69   | 881.08 | 912.44   | 813.57 | --2401.02809 |

| Polarizability models: |    |        |        | n*alp | DFT results |         | AM model |           | TL model  |        | TE model |        | RP model |         | GD model |         | Etot    |               |
|------------------------|----|--------|--------|-------|-------------|---------|----------|-----------|-----------|--------|----------|--------|----------|---------|----------|---------|---------|---------------|
| i                      | n  | isomer | Eb     | Erel  | Aiso        | Aaniso  | Aiso     | Aaniso    | Aiso      | Aaniso | Aiso     | Aaniso | Aiso     | Aaniso  | Aiso     | Aaniso  |         |               |
| 349                    | 12 | 115    | -9.96  | 2.06  | 881.70      | 997.52  | 983.96   | 273.76    | 3607.01   | 797.69 | 21.50    | 793.71 | 44.48    | 976.18  | 984.35   | 964.47  | 936.99  | --2401.02699  |
| 350                    | 12 | 116    | -9.89  | 2.13  | 881.70      | 957.71  | 838.97   | -665.56   | 5667.37   | 794.80 | 17.13    | 789.80 | 38.70    | 923.53  | 838.81   | 902.47  | 771.99  | --2401.02570  |
| 351                    | 12 | 117    | -9.85  | 2.17  | 881.70      | 991.88  | 620.01   | 5658.93   | 16427.96  | 795.08 | 11.87    | 791.02 | 27.71    | 971.14  | 637.39   | 957.09  | 604.08  | --2401.02491  |
| 352                    | 12 | 118    | -9.84  | 2.18  | 881.70      | 1007.48 | 801.47   | 565.63    | 4076.58   | 795.19 | 13.95    | 790.64 | 31.16    | 976.95  | 800.67   | 961.19  | 750.40  | --2401.02473  |
| 353                    | 12 | 119    | -9.84  | 2.18  | 881.70      | 978.96  | 661.65   | -471.50   | 2975.52   | 793.57 | 11.04    | 788.27 | 26.01    | 937.44  | 641.80   | 916.51  | 594.84  | --2401.02469  |
| 354                    | 12 | 120    | -9.81  | 2.21  | 881.70      | 1030.68 | 1024.73  | 1031.80   | 3331.57   | 796.83 | 18.70    | 792.70 | 39.38    | 1001.00 | 1022.31  | 992.75  | 991.03  | --2401.02408  |
| 355                    | 12 | 121    | -9.80  | 2.22  | 881.70      | 990.90  | 1014.73  | -746.59   | 5345.81   | 796.47 | 20.75    | 791.80 | 44.81    | 961.64  | 1018.26  | 934.88  | 928.34  | --2401.02380  |
| 356                    | 12 | 122    | -9.77  | 2.25  | 881.70      | 1028.91 | 1019.45  | 622.02    | 1297.48   | 800.08 | 21.60    | 796.01 | 36.87    | 995.27  | 1008.44  | 974.20  | 942.99  | --2401.02335  |
| 357                    | 12 | 123    | -9.74  | 2.28  | 881.70      | 1008.04 | 890.09   | 904.96    | 2669.40   | 795.66 | 16.50    | 790.90 | 36.07    | 961.45  | 846.02   | 944.59  | 792.89  | --2401.02273  |
| 358                    | 12 | 124    | -9.73  | 2.29  | 881.70      | 1013.98 | 671.87   | 5320.05   | 16083.33  | 795.65 | 12.45    | 791.92 | 29.14    | 990.28  | 670.69   | 973.27  | 629.69  | --2401.02254  |
| 359                    | 12 | 125    | -9.55  | 2.47  | 881.70      | 1038.91 | 701.58   | -175.11   | 2524.84   | 795.51 | 11.63    | 791.28 | 27.12    | 994.72  | 665.82   | 974.89  | 620.87  | --2401.01916  |
| 360                    | 12 | 126    | -9.52  | 2.50  | 881.70      | 1008.29 | 610.90   | -20517.95 | 62148.42  | 795.57 | 12.18    | 791.98 | 29.67    | 985.38  | 605.37   | 967.13  | 572.24  | --2401.01857  |
| 361                    | 12 | 127    | -9.46  | 2.56  | 881.70      | 1080.16 | 968.32   | 1597.50   | 1881.80   | 797.78 | 16.42    | 793.26 | 31.37    | 1047.67 | 971.27   | 1019.72 | 905.69  | --2401.01747  |
| 362                    | 12 | 128    | -9.46  | 2.56  | 881.70      | 1118.02 | 1459.77  | 503.48    | 3173.42   | 800.38 | 26.18    | 796.56 | 51.59    | 1084.69 | 1400.43  | 1045.74 | 1274.12 | --2401.01747  |
| 363                    | 12 | 129    | -9.37  | 2.65  | 881.70      | 1047.09 | 1023.46  | -790.33   | 4281.77   | 799.42 | 22.13    | 797.00 | 45.39    | 1034.03 | 1068.51  | 1021.53 | 1020.18 | --2401.01564  |
| 364                    | 12 | 130    | -9.25  | 2.77  | 881.70      | 1169.75 | 1482.19  | -1107.14  | 5017.90   | 799.84 | 23.39    | 794.83 | 42.26    | 1100.61 | 1408.19  | 1043.21 | 1228.70 | --2401.01340  |
| 365                    | 12 | 131    | -9.24  | 2.78  | 881.70      | 1090.37 | 1029.60  | -49.20    | 2923.60   | 802.89 | 24.42    | 800.56 | 40.73    | 1106.84 | 1124.31  | 1074.06 | 1023.47 | --2401.01326  |
| 366                    | 12 | 132    | -9.16  | 2.86  | 881.70      | 1177.01 | 1482.43  | -26.62    | 3639.95   | 801.39 | 24.11    | 796.89 | 41.34    | 1131.49 | 1448.15  | 1079.42 | 1287.99 | --2401.01157  |
| 367                    | 12 | 133    | -9.15  | 2.87  | 881.70      | 1069.58 | 781.46   | -10185.97 | 32127.30  | 798.08 | 15.07    | 795.61 | 33.33    | 1049.74 | 801.28   | 1019.87 | 734.30  | --2401.01144  |
| 368                    | 12 | 134    | -9.05  | 2.97  | 881.70      | 1221.56 | 1611.10  | 689.25    | 1955.08   | 807.95 | 32.86    | 805.35 | 51.24    | 1237.94 | 1687.40  | 1191.38 | 1536.13 | --2401.00956  |
| 369                    | 12 | 135    | -9.02  | 3.00  | 881.70      | 1163.30 | 1378.85  | -14498.75 | 43622.01  | 801.49 | 24.56    | 799.29 | 47.86    | 1111.72 | 1276.54  | 1076.63 | 1158.59 | --2401.00898  |
| 370                    | 12 | 136    | -8.92  | 3.10  | 881.70      | 1210.41 | 1542.66  | 857.58    | 2735.76   | 802.13 | 24.72    | 798.09 | 42.89    | 1165.52 | 1503.31  | 1108.62 | 1331.04 | --2401.00700  |
| 371                    | 12 | 137    | -8.86  | 3.16  | 881.70      | 1166.56 | 1421.13  | 753.03    | 3806.38   | 801.68 | 25.24    | 800.04 | 49.37    | 1136.52 | 1362.12  | 1104.19 | 1254.23 | --2401.00593  |
| 372                    | 12 | 138    | -8.85  | 3.17  | 881.70      | 1206.60 | 935.27   | -3445.68  | 15355.04  | 801.51 | 15.20    | 799.03 | 24.88    | 1159.37 | 926.75   | 1117.85 | 830.58  | --2401.00574  |
| 373                    | 12 | 139    | -8.70  | 3.32  | 881.70      | 1215.07 | 1518.37  | 836.47    | 1291.61   | 805.04 | 28.31    | 801.80 | 45.68    | 1192.55 | 1541.44  | 1137.87 | 1380.91 | --2401.00276  |
| 374                    | 12 | 140    | -8.69  | 3.33  | 881.70      | 1282.93 | 1782.22  | 8729.04   | 22189.58  | 804.98 | 28.45    | 802.68 | 49.84    | 1270.84 | 1802.70  | 1220.35 | 1644.45 | --2401.00270  |
| 375                    | 12 | 141    | -8.45  | 3.57  | 881.70      | 1224.52 | 1280.17  | 3606.60   | 9130.56   | 805.89 | 24.80    | 804.80 | 39.56    | 1231.50 | 1352.14  | 1173.63 | 1195.59 | --2400.99815  |
| 376                    | 12 | 142    | -8.35  | 3.67  | 881.70      | 1408.90 | 2321.56  | 1110.85   | 3015.27   | 808.48 | 33.96    | 806.04 | 57.50    | 1334.34 | 2144.71  | 1248.68 | 1875.59 | --2400.99612  |
| 377                    | 12 | 143    | -8.33  | 3.69  | 881.70      | 1418.29 | 2177.54  | 786.13    | 1678.98   | 809.32 | 31.33    | 805.09 | 45.87    | 1351.04 | 2071.60  | 1248.06 | 1759.32 | --2400.99575  |
| 378                    | 12 | 144    | -8.32  | 3.70  | 881.70      | 1422.73 | 2064.24  | -2324.16  | 9589.76   | 818.65 | 41.96    | 813.99 | 49.50    | 1511.49 | 2382.22  | 1439.50 | 2162.74 | --2400.99554  |
| 379                    | 13 | 1*     | -12.43 | 0.00  | 955.18      | 851.76  | 393.29   | -801.50   | 4975.32   | 848.47 | 11.07    | 839.61 | 27.03    | 809.92  | 409.12   | 815.49  | 401.10  | --2601.163726 |
| 380                    | 13 | 2      | -12.30 | 0.13  | 955.18      | 835.14  | 375.26   | -4415.42  | 17648.85  | 847.65 | 10.03    | 838.17 | 25.43    | 786.35  | 369.38   | 789.91  | 352.57  | -2601.160974  |
| 381                    | 13 | 3      | -12.20 | 0.23  | 955.18      | 823.66  | 357.80   | 2678.54   | 3672.84   | 847.15 | 9.13     | 837.29 | 24.02    | 770.29  | 348.83   | 778.21  | 338.51  | -2601.158862  |
| 382                    | 13 | 4      | -12.16 | 0.27  | 955.18      | 833.60  | 351.35   | 2160.21   | 2408.05   | 847.45 | 9.13     | 838.02 | 23.93    | 786.93  | 344.48   | 793.53  | 334.09  | -2601.158034  |
| 383                    | 13 | 5      | -12.15 | 0.28  | 955.18      | 829.19  | 410.15   | -2303.68  | 11031.06  | 847.24 | 10.00    | 837.27 | 26.07    | 772.72  | 415.12   | 780.90  | 412.16  | --2601.157919 |
| 384                    | 13 | 6      | -12.12 | 0.31  | 955.18      | 828.18  | 448.75   | -41969.69 | 128576.27 | 847.16 | 11.05    | 836.80 | 28.60    | 755.67  | 447.39   | 769.63  | 461.86  | -2601.157248  |
| 385                    | 13 | 7      | -12.11 | 0.32  | 955.18      | 841.55  | 419.68   | 1724.35   | 1369.28   | 847.49 | 10.11    | 837.86 | 26.15    | 785.89  | 429.04   | 792.55  | 422.31  | -2601.157006  |
| 386                    | 13 | 8      | -12.07 | 0.36  | 955.18      | 843.09  | 354.98   | 1225.98   | 1084.29   | 847.71 | 9.07     | 838.68 | 23.30    | 793.11  | 338.60   | 799.57  | 318.34  | -2601.156178  |
| 387                    | 13 | 9      | -12.07 | 0.36  | 955.18      | 852.69  | 420.09   | 2188.64   | 3989.32   | 847.55 | 10.29    | 837.81 | 27.43    | 813.62  | 432.18   | 819.81  | 435.17  | -2601.156169  |
| 388                    | 13 | 10     | -12.06 | 0.37  | 955.18      | 845.59  | 381.28   | 1399.81   | 1369.13   | 846.94 | 9.08     | 836.66 | 25.20    | 792.47  | 386.72   | 799.59  | 390.28  | --2601.156023 |
| 389                    | 13 | 11     | -12.04 | 0.39  | 955.18      | 894.76  | 417.39   | 21382.27  | 58884.10  | 848.84 | 9.52     | 840.67 | 24.37    | 844.57  | 426.86   | 848.57  | 416.03  | -2601.155712  |
| 390                    | 13 | 12     | -12.03 | 0.40  | 955.18      | 861.50  | 402.31   | 702.27    | 5659.23   | 848.27 | 9.96     | 839.53 | 24.76    | 815.21  | 407.55   | 815.20  | 384.43  | -2601.155373  |
| 391                    | 13 | 13     | -12.02 | 0.41  | 955.18      | 892.79  | 437.39   | -4911.00  | 19864.75  | 849.33 | 11.40    | 841.33 | 27.11    | 843.93  | 439.63   | 846.49  | 421.29  | -2601.155196  |
| 392                    | 13 | 14     | -12.02 | 0.41  | 955.18      | 849.05  | 362.75   | 2983.68   | 4767.39   | 847.83 | 9.42     | 838.65 | 23.77    | 799.88  | 363.94   | 803.24  | 338.57  | --2601.155178 |
| 393                    | 13 | 15     | -12.02 | 0.41  | 955.18      | 872.24  | 378.23   | 3788.04   | 7415.05   | 848.09 | 8.93     | 839.37 | 23.52    | 826.85  | 393.60   | 827.07  | 381.36  | -2601.155158  |
| 394                    | 13 | 16     | -12.01 | 0.42  | 955.18      | 857.41  | 423.53   | 5387.22   | 11656.33  | 848.32 | 10.94    | 839.52 | 27.51    | 810.11  | 419.13   | 816.11  | 416.99  | -2601.154950  |
| 395                    | 13 | 17     | -12.00 | 0.43  | 955.18      | 859.92  | 403.32   | -16756.52 | 54646.40  | 847.63 | 9.35     | 838.26 | 25.50    | 804.60  | 438.62   | 809.85  | 435.26  | -2601.154819  |
| 396                    | 13 | 18     | -12.00 | 0.43  | 955.18      | 810.87  | 379.81   | 874.68    | 4575.73   | 846.78 | 9.77     | 836.28 | 25.81    | 742.56  | 376.00   | 753.76  | 374.92  | --2601.154755 |
| 397                    | 13 | 19     | -12.00 | 0.43  | 955.18      | 873.94  | 467.62   | 1680.20   | 2198.44   | 848.33 | 11.01    | 839.47 | 27.46    | 827.28  | 493.28   | 828.82  | 476.05  | -2601.154742  |
| 398                    | 13 | 20     | -11.98 | 0.45  | 955.18      | 885.80  | 418.27   | 3284.23   | 6150.57   | 849.06 | 10.95    | 840.94 | 26.31    | 838.21  | 426.98   | 840.28  | 406.49  | -2601.154411  |
| 399                    | 13 | 21     | -11.97 | 0.46  | 955.18      | 871.79  | 404.93   | 1925.08   | 1458.82   | 848.57 | 10.74    | 839.95 | 26.26    | 818.85  | 398.96   | 821.93  | 380.76  | -2601.154261  |

| Polarizability models: |    |        |        |      | n*alp<br>Aiso | DFT results |        | AM model   |           | TL model |        | TE model |        | RP model |        | GD model |        | Etot         |
|------------------------|----|--------|--------|------|---------------|-------------|--------|------------|-----------|----------|--------|----------|--------|----------|--------|----------|--------|--------------|
| i                      | n  | isomer | Eb     | Erel |               | Aiso        | Aaniso | Aiso       | Aaniso    | Aiso     | Aaniso | Aiso     | Aaniso | Aiso     | Aaniso | Aiso     | Aaniso |              |
| 400                    | 13 | 22     | -11.96 | 0.47 | 955.18        | 861.87      | 393.92 | 2065.90    | 174.80    | 847.49   | 8.74   | 838.09   | 23.82  | 811.64   | 401.22 | 816.57   | 396.58 | -2601.153932 |
| 401                    | 13 | 23     | -11.96 | 0.47 | 955.18        | 838.56      | 427.16 | 2266.03    | 3993.36   | 847.50   | 10.80  | 837.76   | 29.93  | 784.88   | 469.01 | 789.60   | 475.48 | -2601.153872 |
| 402                    | 13 | 24     | -11.93 | 0.50 | 955.18        | 871.25      | 357.79 | 2161.80    | 4820.95   | 848.45   | 9.04   | 840.00   | 22.47  | 840.64   | 360.58 | 844.32   | 329.95 | -2601.153390 |
| 403                    | 13 | 25     | -11.93 | 0.50 | 955.18        | 875.33      | 380.17 | 3993.42    | 6189.16   | 848.55   | 8.80   | 840.18   | 22.24  | 832.72   | 349.65 | 838.86   | 340.27 | -2601.153356 |
| 404                    | 13 | 26     | -11.92 | 0.51 | 955.18        | 880.78      | 373.01 | 1446.53    | 864.52    | 848.74   | 8.64   | 840.79   | 22.64  | 836.03   | 368.18 | 835.58   | 349.36 | -2601.153068 |
| 405                    | 13 | 27     | -11.89 | 0.54 | 955.18        | 865.83      | 386.74 | -1767.53   | 5643.99   | 848.00   | 9.22   | 839.13   | 24.63  | 817.85   | 404.88 | 819.76   | 399.83 | -2601.152575 |
| 406                    | 13 | 28     | -11.89 | 0.54 | 955.18        | 918.18      | 423.63 | -13443.54  | 34589.75  | 849.68   | 10.03  | 842.22   | 25.19  | 861.67   | 411.14 | 868.35   | 407.04 | -2601.152534 |
| 407                    | 13 | 29     | -11.89 | 0.54 | 955.18        | 848.76      | 407.44 | 52754.47   | 154307.88 | 847.61   | 10.03  | 838.21   | 25.64  | 797.93   | 411.66 | 803.30   | 400.12 | -2601.152417 |
| 408                    | 13 | 30     | -11.87 | 0.56 | 955.18        | 868.50      | 381.82 | 1620.85    | 1547.19   | 847.76   | 8.72   | 838.69   | 23.45  | 818.18   | 393.38 | 821.28   | 383.46 | -2601.152206 |
| 409                    | 13 | 31     | -11.87 | 0.56 | 955.18        | 864.10      | 398.57 | 2793.19    | 5324.00   | 848.01   | 10.03  | 839.08   | 26.87  | 808.94   | 428.77 | 811.63   | 428.81 | -2601.152194 |
| 410                    | 13 | 32     | -11.87 | 0.56 | 955.18        | 853.34      | 400.32 | 1646.74    | 1509.21   | 847.03   | 9.44   | 836.80   | 26.34  | 800.68   | 416.55 | 807.00   | 417.27 | -2601.152084 |
| 411                    | 13 | 33     | -11.87 | 0.56 | 955.18        | 856.81      | 390.72 | 3251.76    | 6889.26   | 847.65   | 9.16   | 838.32   | 24.80  | 798.81   | 406.81 | 802.72   | 401.00 | -2601.152007 |
| 412                    | 13 | 34     | -11.86 | 0.57 | 955.18        | 857.98      | 375.58 | 735.30     | 2113.30   | 847.36   | 8.72   | 837.74   | 23.80  | 809.85   | 386.51 | 815.91   | 384.99 | -2601.151878 |
| 413                    | 13 | 35     | -11.86 | 0.57 | 955.18        | 888.50      | 445.24 | -1400.49   | 8166.29   | 849.02   | 10.14  | 840.97   | 25.44  | 839.45   | 461.15 | 843.91   | 457.87 | -2601.151836 |
| 414                    | 13 | 36     | -11.86 | 0.57 | 955.18        | 880.81      | 383.38 | 2430.92    | 2679.89   | 848.58   | 8.46   | 840.47   | 22.09  | 834.49   | 387.85 | 836.80   | 368.02 | -2601.151832 |
| 415                    | 13 | 37     | -11.85 | 0.58 | 955.18        | 846.41      | 419.46 | 58.33      | 7069.11   | 847.71   | 9.69   | 838.38   | 24.93  | 798.67   | 431.49 | 800.12   | 415.16 | -2601.151669 |
| 416                    | 13 | 38     | -11.84 | 0.59 | 955.18        | 866.14      | 368.69 | 3184.53    | 4329.31   | 848.12   | 8.82   | 839.29   | 22.21  | 830.02   | 366.09 | 834.81   | 339.45 | -2601.151412 |
| 417                    | 13 | 39     | -11.83 | 0.60 | 955.18        | 876.02      | 332.44 | 374.02     | 3985.59   | 847.72   | 7.56   | 838.70   | 20.37  | 843.48   | 316.36 | 848.00   | 304.84 | -2601.151236 |
| 418                    | 13 | 40     | -11.83 | 0.60 | 955.18        | 862.21      | 414.09 | 2491.94    | 4149.00   | 847.92   | 9.45   | 838.91   | 25.38  | 810.02   | 420.44 | 815.97   | 416.24 | -2601.151200 |
| 419                    | 13 | 41     | -11.82 | 0.61 | 955.18        | 879.95      | 449.26 | 26708.42   | 68677.76  | 848.76   | 10.16  | 840.41   | 25.62  | 837.74   | 432.88 | 843.03   | 424.64 | -2601.151127 |
| 420                    | 13 | 42     | -11.81 | 0.62 | 955.18        | 871.36      | 336.00 | 1682.69    | 891.49    | 847.73   | 7.60   | 838.75   | 20.79  | 826.79   | 311.66 | 835.50   | 305.21 | -2601.150767 |
| 421                    | 13 | 43     | -11.80 | 0.63 | 955.18        | 870.02      | 372.58 | 1818.54    | 1704.21   | 848.16   | 8.62   | 839.60   | 23.17  | 817.45   | 375.69 | 820.66   | 364.63 | -2601.150658 |
| 422                    | 13 | 44     | -11.79 | 0.64 | 955.18        | 874.46      | 474.98 | -305.70    | 3496.50   | 848.42   | 11.05  | 839.55   | 28.66  | 838.26   | 502.33 | 845.31   | 508.38 | -2601.150463 |
| 423                    | 13 | 45     | -11.79 | 0.64 | 955.18        | 867.21      | 425.60 | 4526.26    | 10678.69  | 848.20   | 10.17  | 839.38   | 26.61  | 813.19   | 422.60 | 819.42   | 421.23 | -2601.150389 |
| 424                    | 13 | 46     | -11.78 | 0.65 | 955.18        | 860.53      | 462.68 | 2859.50    | 5391.84   | 848.17   | 10.57  | 839.24   | 27.11  | 815.30   | 469.03 | 821.22   | 466.09 | -2601.150322 |
| 425                    | 13 | 47     | -11.77 | 0.66 | 955.18        | 849.40      | 331.62 | 1429.13    | 2346.31   | 847.71   | 8.68   | 838.63   | 22.49  | 816.18   | 327.12 | 821.10   | 298.46 | -2601.150081 |
| 426                    | 13 | 48     | -11.77 | 0.66 | 955.18        | 862.07      | 413.04 | 803.88     | 4082.26   | 848.48   | 10.92  | 839.86   | 27.33  | 821.36   | 409.76 | 827.58   | 406.31 | -2601.149999 |
| 427                    | 13 | 49     | -11.76 | 0.67 | 955.18        | 910.89      | 389.86 | 74.47      | 5293.79   | 849.31   | 9.09   | 841.72   | 23.28  | 855.64   | 375.45 | 860.29   | 366.11 | -2601.149921 |
| 428                    | 13 | 50     | -11.76 | 0.67 | 955.18        | 900.68      | 370.50 | -2071.02   | 12720.04  | 848.96   | 8.45   | 841.11   | 21.49  | 849.87   | 350.58 | 851.06   | 336.12 | -2601.149777 |
| 429                    | 13 | 51     | -11.76 | 0.67 | 955.18        | 874.04      | 348.43 | 2415.72    | 3360.32   | 848.38   | 7.83   | 840.12   | 20.28  | 839.56   | 332.50 | 842.70   | 309.84 | -2601.149726 |
| 430                    | 13 | 52     | -11.75 | 0.68 | 955.18        | 884.98      | 413.06 | 962.84     | 3531.07   | 848.51   | 8.73   | 840.21   | 22.03  | 845.79   | 403.17 | 846.67   | 385.62 | -2601.149715 |
| 431                    | 13 | 53     | -11.75 | 0.68 | 955.18        | 825.84      | 389.43 | 1844.19    | 1772.72   | 847.47   | 10.16  | 837.86   | 26.15  | 763.31   | 362.20 | 770.29   | 360.03 | -2601.149694 |
| 432                    | 13 | 54     | -11.75 | 0.68 | 955.18        | 873.55      | 481.82 | -2624.20   | 11569.46  | 848.30   | 11.02  | 839.45   | 27.76  | 826.97   | 511.32 | 832.85   | 503.54 | -2601.149558 |
| 433                    | 13 | 55     | -11.74 | 0.69 | 955.18        | 880.75      | 340.95 | 1629.34    | 1981.22   | 848.04   | 7.23   | 839.53   | 19.37  | 840.06   | 331.48 | 837.33   | 304.76 | -2601.149458 |
| 434                    | 13 | 56     | -11.73 | 0.70 | 955.18        | 872.19      | 339.76 | 1948.31    | 2017.62   | 848.47   | 8.18   | 840.34   | 22.30  | 825.11   | 338.40 | 827.01   | 328.40 | -2601.149278 |
| 435                    | 13 | 57     | -11.73 | 0.70 | 955.18        | 897.35      | 457.67 | 2411.00    | 3972.37   | 849.34   | 10.00  | 841.73   | 24.51  | 847.44   | 456.60 | 848.19   | 432.31 | -2601.149213 |
| 436                    | 13 | 58     | -11.73 | 0.70 | 955.18        | 856.49      | 360.27 | 389.01     | 4788.09   | 847.49   | 8.62   | 838.09   | 23.37  | 811.92   | 353.17 | 819.68   | 353.60 | -2601.149169 |
| 437                    | 13 | 59     | -11.73 | 0.70 | 955.18        | 879.42      | 407.39 | -219.62    | 8372.06   | 848.22   | 9.38   | 839.40   | 25.20  | 843.38   | 421.12 | 846.97   | 413.94 | -2601.149144 |
| 438                    | 13 | 60     | -11.72 | 0.71 | 955.18        | 867.34      | 351.13 | 1502.95    | 1606.46   | 848.09   | 7.89   | 839.55   | 21.29  | 814.42   | 332.10 | 816.99   | 319.89 | -2601.148979 |
| 439                    | 13 | 61     | -11.72 | 0.71 | 955.18        | 861.68      | 373.00 | 2145.01    | 2701.11   | 847.66   | 9.43   | 838.30   | 25.05  | 819.86   | 382.01 | 830.16   | 396.83 | -2601.148896 |
| 440                    | 13 | 62     | -11.70 | 0.73 | 955.18        | 850.89      | 320.38 | 2759.96    | 5511.40   | 847.23   | 7.33   | 837.68   | 19.86  | 810.25   | 304.59 | 816.82   | 282.87 | -2601.148658 |
| 441                    | 13 | 63     | -11.69 | 0.74 | 955.18        | 847.63      | 316.69 | 1363.48    | 814.28    | 848.10   | 7.63   | 839.79   | 19.93  | 811.02   | 289.64 | 816.74   | 263.33 | -2601.148405 |
| 442                    | 13 | 64     | -11.69 | 0.74 | 955.18        | 851.55      | 337.63 | -140.06    | 4340.73   | 847.73   | 8.35   | 838.67   | 21.96  | 796.77   | 322.29 | 802.67   | 317.75 | -2601.148371 |
| 443                    | 13 | 65     | -11.68 | 0.75 | 955.18        | 881.23      | 367.60 | -54558.17  | 173299.68 | 848.14   | 8.13   | 839.60   | 21.36  | 838.80   | 374.27 | 838.62   | 357.05 | -2601.148117 |
| 444                    | 13 | 66     | -11.67 | 0.76 | 955.18        | 869.12      | 388.50 | 2021.39    | 2218.30   | 848.08   | 8.78   | 839.39   | 24.20  | 819.01   | 390.73 | 821.91   | 381.97 | -2601.148025 |
| 445                    | 13 | 67     | -11.66 | 0.77 | 955.18        | 870.04      | 420.73 | 2827.10    | 4573.98   | 848.17   | 10.40  | 839.27   | 27.74  | 824.93   | 412.73 | 829.56   | 410.91 | -2601.147751 |
| 446                    | 13 | 68     | -11.66 | 0.77 | 955.18        | 869.89      | 406.41 | 2858.30    | 4342.36   | 848.09   | 8.72   | 839.46   | 24.16  | 816.68   | 402.15 | 818.43   | 392.52 | -2601.147717 |
| 447                    | 13 | 69     | -11.64 | 0.79 | 955.18        | 884.83      | 528.44 | 1792.29    | 1442.60   | 848.73   | 11.63  | 840.33   | 33.08  | 830.44   | 497.76 | 837.28   | 494.44 | -2601.147425 |
| 448                    | 13 | 70     | -11.64 | 0.79 | 955.18        | 881.51      | 509.71 | -149148.84 | 450099.27 | 848.81   | 12.65  | 840.23   | 31.32  | 847.62   | 544.63 | 854.71   | 554.27 | -2601.147275 |
| 449                    | 13 | 71     | -11.64 | 0.79 | 955.18        | 884.16      | 423.83 | 4308.93    | 9173.89   | 848.78   | 10.06  | 840.50   | 25.89  | 849.80   | 451.95 | 856.52   | 456.57 | -2601.147246 |
| 450                    | 13 | 72     | -11.62 | 0.81 | 955.18        | 886.50      | 277.19 | 3432.36    | 4977.94   | 848.06   | 5.62   | 839.70   | 14.51  | 851.43   | 301.49 | 841.12   | 275.96 | -2601.146955 |

| Polarizability models: |    |        |        |      | n*alp<br>Aiso | DFT results |        | AM model            |          | TL model |        | TE model |        | RP model |        | GD model |              | Etot          |
|------------------------|----|--------|--------|------|---------------|-------------|--------|---------------------|----------|----------|--------|----------|--------|----------|--------|----------|--------------|---------------|
| i                      | n  | isomer | Eb     | Erel |               | Aiso        | Aaniso | Aiso                | Aaniso   | Aiso     | Aaniso | Aiso     | Aaniso | Aiso     | Aaniso | Aiso     | Aaniso       |               |
| 451                    | 13 | 73     | -11.61 | 0.82 | 955.18        | 879.52      | 387.38 | 5360.60             | 15969.37 | 848.12   | 9.02   | 839.33   | 24.69  | 842.78   | 399.35 | 846.28   | 392.00       | -2601.146776  |
| 452                    | 13 | 74     | -11.61 | 0.82 | 955.18        | 892.81      | 401.95 | 2869.54             | 5447.97  | 848.70   | 10.07  | 840.48   | 25.92  | 853.20   | 433.37 | 856.23   | 428.72       | -2601.146708  |
| 453                    | 13 | 75     | -11.61 | 0.82 | 955.18        | 900.43      | 361.53 | 2058.50             | 7355.35  | 848.68   | 7.90   | 840.70   | 20.72  | 869.83   | 354.42 | 872.97   | 335.75       | -2601.146701  |
| 454                    | 13 | 76     | -11.60 | 0.83 | 955.18        | 886.38      | 424.31 | 2189.55             | 2773.09  | 848.37   | 10.18  | 839.58   | 26.52  | 841.50   | 432.73 | 845.17   | 425.59       | -2601.146604  |
| 455                    | 13 | 77     | -11.60 | 0.83 | 955.18        | 864.91      | 358.75 | 1478.18             | 1548.96  | 847.28   | 7.97   | 837.76   | 21.60  | 821.04   | 353.88 | 832.07   | 350.27       | -2601.146483  |
| 456                    | 13 | 78     | -11.59 | 0.84 | 955.18        | 874.35      | 331.80 | 2347.47             | 1988.35  | 848.93   | 8.60   | 841.24   | 22.96  | 843.51   | 359.29 | 843.87   | 352.38       | -2601.146335  |
| 457                    | 13 | 79     | -11.59 | 0.84 | 955.18        | 898.85      | 541.64 | 666493.941995171.93 | 848.97   | 11.78    | 840.74 | 33.04    | 853.98 | 523.59   | 856.49 | 511.91   | -2601.146278 |               |
| 458                    | 13 | 80     | -11.58 | 0.85 | 955.18        | 1010.06     | 896.72 | -213.29             | 3938.87  | 853.69   | 17.85  | 847.02   | 35.47  | 948.25   | 850.50 | 951.19   | 838.12       | -2601.146159  |
| 459                    | 13 | 81     | -11.58 | 0.85 | 955.18        | 880.94      | 377.22 | 4161.44             | 8329.57  | 848.21   | 8.70   | 839.65   | 23.11  | 845.36   | 389.66 | 848.93   | 376.28       | -2601.146087  |
| 460                    | 13 | 82     | -11.57 | 0.86 | 955.18        | 899.45      | 423.72 | 3045.46             | 3552.92  | 848.91   | 10.29  | 840.87   | 26.84  | 866.23   | 438.71 | 868.90   | 431.86       | -2601.145837  |
| 461                    | 13 | 83     | -11.57 | 0.86 | 955.18        | 957.47      | 470.35 | 1059.47             | 3170.37  | 851.33   | 9.64   | 844.96   | 21.74  | 904.32   | 452.96 | 903.51   | 439.29       | -2601.145818  |
| 462                    | 13 | 84     | -11.56 | 0.87 | 955.18        | 905.03      | 406.90 | 2786.34             | 4097.61  | 848.92   | 8.63   | 841.07   | 22.25  | 855.18   | 401.06 | 860.59   | 384.74       | -2601.145594  |
| 463                    | 13 | 85     | -11.55 | 0.88 | 955.18        | 897.52      | 385.12 | 7964.74             | 22159.64 | 848.47   | 9.26   | 840.08   | 24.44  | 860.11   | 405.50 | 862.02   | 396.76       | -2601.145404  |
| 464                    | 13 | 86     | -11.54 | 0.89 | 955.18        | 927.30      | 321.03 | 2213.36             | 6326.06  | 849.26   | 6.92   | 841.93   | 16.72  | 880.76   | 329.53 | 875.50   | 314.25       | -2601.145313  |
| 465                    | 13 | 87     | -11.54 | 0.89 | 955.18        | 894.81      | 356.79 | 2823.11             | 3622.44  | 848.36   | 8.31   | 840.07   | 21.87  | 861.37   | 357.52 | 863.91   | 343.91       | -2601.145254  |
| 466                    | 13 | 88     | -11.53 | 0.90 | 955.18        | 896.99      | 309.68 | 3171.61             | 5116.88  | 848.99   | 6.90   | 841.39   | 16.81  | 848.92   | 305.27 | 846.05   | 300.64       | -2601.144965  |
| 467                    | 13 | 89     | -11.48 | 0.95 | 955.18        | 902.90      | 329.11 | -804.82             | 5594.22  | 848.49   | 6.92   | 840.50   | 18.85  | 869.95   | 303.85 | 871.31   | 279.31       | -2601.144006  |
| 468                    | 13 | 90     | -11.46 | 0.97 | 955.18        | 994.98      | 841.89 | 424.08              | 2345.10  | 851.65   | 15.52  | 844.50   | 33.90  | 944.37   | 842.10 | 934.48   | 791.81       | -2601.143666  |
| 469                    | 13 | 91     | -11.46 | 0.97 | 955.18        | 922.61      | 555.87 | 3638.09             | 3810.51  | 850.13   | 12.25  | 843.02   | 33.54  | 883.86   | 548.40 | 885.73   | 533.79       | -2601.143545  |
| 470                    | 13 | 92     | -11.43 | 1.00 | 955.18        | 872.82      | 377.22 | 1931.98             | 1980.14  | 848.03   | 8.83   | 839.39   | 23.84  | 829.87   | 380.24 | 833.21   | 365.92       | -2601.143091  |
| 471                    | 13 | 93     | -11.41 | 1.02 | 955.18        | 911.72      | 396.99 | 3125.47             | 4575.29  | 848.75   | 8.92   | 840.64   | 23.50  | 871.99   | 413.72 | 870.63   | 400.84       | -2601.142503  |
| 472                    | 13 | 94     | -11.41 | 1.02 | 955.18        | 894.67      | 397.13 | 10877.80            | 28238.09 | 848.78   | 9.15   | 840.87   | 24.59  | 846.08   | 388.57 | 849.21   | 380.21       | -2601.142488  |
| 473                    | 13 | 95     | -11.39 | 1.04 | 955.18        | 900.11      | 438.50 | 9733.04             | 25208.05 | 849.02   | 10.94  | 840.98   | 28.24  | 862.17   | 454.74 | 863.61   | 449.52       | -2601.142113  |
| 474                    | 13 | 96     | -11.39 | 1.04 | 955.18        | 901.11      | 547.66 | 2391.00             | 2943.84  | 849.40   | 11.94  | 841.76   | 33.33  | 852.40   | 527.79 | 854.95   | 516.72       | -2601.142074  |
| 475                    | 13 | 97     | -11.38 | 1.05 | 955.18        | 960.57      | 373.42 | 742.02              | 2468.15  | 850.82   | 6.77   | 844.18   | 14.88  | 914.79   | 390.80 | 907.97   | 369.41       | -2601.141927  |
| 476                    | 13 | 98     | -11.37 | 1.06 | 955.18        | 1030.35     | 700.61 | -3521.77            | 11423.06 | 852.87   | 13.02  | 847.09   | 28.03  | 962.29   | 664.29 | 961.58   | 640.58       | -2601.141683  |
| 477                    | 13 | 99     | -11.37 | 1.06 | 955.18        | 899.95      | 309.66 | 2137.27             | 2903.72  | 848.11   | 6.39   | 839.83   | 16.77  | 858.96   | 336.93 | 849.24   | 317.50       | -2601.141664  |
| 478                    | 13 | 100    | -11.36 | 1.07 | 955.18        | 960.08      | 731.53 | 136.21              | 2612.96  | 851.01   | 14.27  | 843.83   | 32.80  | 901.72   | 688.05 | 899.92   | 669.05       | --2601.14158  |
| 479                    | 13 | 101    | -11.36 | 1.07 | 955.18        | 923.84      | 318.24 | 3759.79             | 4663.46  | 848.45   | 6.47   | 840.61   | 16.80  | 893.29   | 364.73 | 881.75   | 340.27       | --2601.14149  |
| 480                    | 13 | 102    | -11.33 | 1.10 | 955.18        | 929.14      | 409.13 | -796.26             | 8639.90  | 849.31   | 8.40   | 841.87   | 21.42  | 884.29   | 421.88 | 877.19   | 396.12       | --2601.141084 |
| 481                    | 13 | 103    | -11.32 | 1.11 | 955.18        | 911.56      | 388.25 | 6142.61             | 11867.19 | 848.80   | 8.20   | 840.97   | 21.62  | 874.55   | 398.59 | 874.56   | 376.84       | --2601.141079 |
| 482                    | 13 | 104    | -11.31 | 1.12 | 955.18        | 878.18      | 298.44 | 2201.91             | 2819.21  | 848.02   | 6.92   | 839.60   | 18.45  | 835.69   | 308.52 | 830.08   | 300.26       | --2601.141045 |
| 483                    | 13 | 105    | -11.30 | 1.13 | 955.18        | 914.30      | 536.81 | 2297.54             | 3611.49  | 849.98   | 12.05  | 842.98   | 33.28  | 875.51   | 517.74 | 878.34   | 505.11       | --2601.141031 |
| 484                    | 13 | 106    | -11.30 | 1.13 | 955.18        | 937.91      | 567.63 | -5857.80            | 26107.24 | 851.28   | 13.03  | 845.35   | 34.64  | 905.80   | 567.43 | 909.66   | 558.45       | --2601.141029 |
| 485                    | 13 | 107    | -11.29 | 1.14 | 955.18        | 877.18      | 311.18 | -1495.36            | 7354.38  | 847.97   | 7.31   | 839.40   | 19.68  | 835.97   | 319.31 | 835.76   | 323.49       | --2601.141010 |
| 486                    | 13 | 108    | -11.28 | 1.15 | 955.18        | 910.33      | 281.71 | 836.15              | 3861.91  | 848.23   | 6.48   | 840.05   | 16.80  | 883.65   | 307.09 | 879.34   | 290.89       | --2601.139994 |
| 487                    | 13 | 109    | -11.27 | 1.16 | 955.18        | 926.47      | 420.65 | 3456.60             | 5897.57  | 849.36   | 9.04   | 841.86   | 23.11  | 885.39   | 451.84 | 882.47   | 435.88       | --2601.13977  |
| 488                    | 13 | 110    | -11.26 | 1.17 | 955.18        | 902.93      | 541.88 | -2504.30            | 13249.64 | 849.38   | 11.37  | 841.91   | 31.56  | 852.98   | 498.81 | 854.28   | 494.66       | --2601.13952  |
| 489                    | 13 | 111    | -11.26 | 1.17 | 955.18        | 1001.97     | 403.99 | 1442.93             | 3951.34  | 852.01   | 7.83   | 846.34   | 17.12  | 941.60   | 412.23 | 940.36   | 400.12       | --2601.13945  |
| 490                    | 13 | 112    | -11.26 | 1.17 | 955.18        | 920.21      | 411.62 | 2213.88             | 1991.28  | 848.79   | 8.82   | 840.73   | 23.17  | 879.03   | 429.04 | 877.08   | 413.98       | --2601.13941  |
| 491                    | 13 | 113    | -11.22 | 1.21 | 955.18        | 940.87      | 771.20 | 8061.91             | 21716.49 | 850.56   | 16.48  | 842.88   | 39.44  | 901.08   | 766.23 | 897.22   | 738.21       | --2601.13865  |
| 492                    | 13 | 114    | -11.22 | 1.21 | 955.18        | 925.66      | 410.93 | 7519.65             | 20172.61 | 849.26   | 8.64   | 841.73   | 22.49  | 881.21   | 436.16 | 878.33   | 422.14       | --2601.13853  |
| 493                    | 13 | 115    | -11.21 | 1.22 | 955.18        | 928.75      | 432.57 | 24230.28            | 68434.12 | 849.66   | 10.24  | 842.37   | 25.40  | 894.19   | 440.86 | 894.68   | 426.82       | --2601.13839  |
| 494                    | 13 | 116    | -11.19 | 1.24 | 955.18        | 923.96      | 449.56 | 474.47              | 9401.18  | 849.83   | 11.27  | 842.55   | 27.72  | 888.69   | 462.80 | 890.01   | 454.77       | --2601.13808  |
| 495                    | 13 | 117    | -11.17 | 1.26 | 955.18        | 1007.75     | 588.52 | 1701.24             | 4457.94  | 852.04   | 10.75  | 846.13   | 23.68  | 944.88   | 585.87 | 942.22   | 567.54       | --2601.13754  |
| 496                    | 13 | 118    | -11.17 | 1.26 | 955.18        | 945.45      | 765.46 | -1481.39            | 6927.90  | 850.51   | 16.54  | 842.82   | 39.60  | 898.12   | 762.21 | 892.88   | 733.30       | --2601.13754  |
| 497                    | 13 | 119    | -11.14 | 1.29 | 955.18        | 902.48      | 418.87 | -1368.38            | 9667.38  | 849.68   | 10.61  | 842.72   | 27.65  | 864.50   | 431.63 | 866.74   | 420.83       | --2601.13704  |
| 498                    | 13 | 120    | -11.14 | 1.29 | 955.18        | 962.42      | 848.42 | 12960.08            | 29992.48 | 853.09   | 19.55  | 846.81   | 43.21  | 913.45   | 801.17 | 915.62   | 788.64       | --2601.13699  |
| 499                    | 13 | 121    | -11.14 | 1.29 | 955.18        | 982.28      | 153.37 | 2655.71             | 5579.72  | 850.32   | 2.60   | 844.14   | 5.48   | 931.95   | 136.16 | 917.65   | 132.76       | --2601.13696  |
| 500                    | 13 | 122    | -11.11 | 1.32 | 955.18        | 990.33      | 368.38 | 2022.92             | 5617.34  | 851.16   | 7.10   | 845.05   | 16.55  | 942.95   | 380.77 | 941.41   | 370.67       | --2601.13641  |
| 501                    | 13 | 123    | -11.11 | 1.32 | 955.18        | 917.52      | 539.59 | -2966.64            | 13332.70 | 849.91   | 13.11  | 842.44   | 32.65  | 879.07   | 538.76 | 880.25   | 536.27       | --2601.13639  |

| Polarizability models: |    |        |        | n*alp | DFT results |         | AM model |           | TL model  |        | TE model |        | RP model |         | GD model |         | Etot    |               |
|------------------------|----|--------|--------|-------|-------------|---------|----------|-----------|-----------|--------|----------|--------|----------|---------|----------|---------|---------|---------------|
| i                      | n  | isomer | Eb     | Erel  | Aiso        | Aaniso  | Aiso     | Aaniso    | Aiso      | Aaniso | Aiso     | Aaniso | Aiso     | Aaniso  | Aiso     | Aaniso  |         |               |
| 502                    | 13 | 124    | -11.11 | 1.32  | 955.18      | 1032.35 | 684.54   | 628.65    | 3945.26   | 851.96 | 11.79    | 845.86 | 25.00    | 988.46  | 720.31   | 962.50  | 651.11  | --2601.13630  |
| 503                    | 13 | 125    | -11.09 | 1.34  | 955.18      | 951.93  | 355.03   | 12551.34  | 629.61    | 849.73 | 6.81     | 843.17 | 17.93    | 916.70  | 333.92   | 911.96  | 309.07  | --2601.13601  |
| 504                    | 13 | 126    | -11.09 | 1.34  | 955.18      | 966.22  | 472.39   | -726.55   | 14523.96  | 850.77 | 10.07    | 844.26 | 24.08    | 923.87  | 497.50   | 921.69  | 483.26  | --2601.13592  |
| 505                    | 13 | 127    | -11.08 | 1.35  | 955.18      | 924.25  | 533.04   | 500.16    | 3261.81   | 849.86 | 12.18    | 842.64 | 32.87    | 884.48  | 528.72   | 880.90  | 510.33  | --2601.13575  |
| 506                    | 13 | 128    | -11.08 | 1.35  | 955.18      | 945.48  | 826.65   | 766.72    | 2344.70   | 851.46 | 17.72    | 844.65 | 41.64    | 901.42  | 803.04   | 893.94  | 763.80  | --2601.13572  |
| 507                    | 13 | 129    | -11.07 | 1.36  | 955.18      | 954.75  | 835.08   | -389.46   | 4405.69   | 851.60 | 18.64    | 844.36 | 43.81    | 915.21  | 817.64   | 909.90  | 783.66  | --2601.13553  |
| 508                    | 13 | 130    | -11.06 | 1.37  | 955.18      | 925.87  | 279.56   | 943.95    | 19676.54  | 849.01 | 5.92     | 841.83 | 15.34    | 887.87  | 266.71   | 884.27  | 257.72  | --2601.13541  |
| 509                    | 13 | 131    | -11.05 | 1.38  | 955.18      | 934.75  | 484.47   | 12145.10  | 23432.69  | 850.44 | 11.76    | 843.80 | 28.41    | 907.75  | 524.66   | 909.66  | 518.60  | --2601.13512  |
| 510                    | 13 | 132    | -11.05 | 1.38  | 955.18      | 943.95  | 460.54   | -105.40   | 4814.51   | 850.13 | 10.70    | 843.21 | 26.74    | 908.68  | 481.87   | 903.87  | 464.62  | --2601.13511  |
| 511                    | 13 | 133    | -11.02 | 1.41  | 955.18      | 1201.68 | 1469.05  | 522.29    | 1901.70   | 858.95 | 24.30    | 853.04 | 40.83    | 1143.73 | 1473.07  | 1090.12 | 1280.57 | --2601.13453  |
| 512                    | 13 | 134    | -10.97 | 1.46  | 955.18      | 964.74  | 825.87   | 3305.02   | 6712.42   | 851.43 | 17.73    | 844.37 | 42.06    | 923.22  | 809.85   | 913.65  | 762.10  | --2601.13344  |
| 513                    | 13 | 135    | -10.96 | 1.47  | 955.18      | 974.54  | 735.58   | -5931.57  | 16274.02  | 851.58 | 15.40    | 845.38 | 36.00    | 943.11  | 733.18   | 935.61  | 689.05  | --2601.13325  |
| 514                    | 13 | 136    | -10.95 | 1.48  | 955.18      | 968.93  | 821.97   | 1507.79   | 2636.72   | 851.90 | 17.83    | 845.39 | 41.70    | 935.84  | 808.89   | 926.94  | 759.55  | --2601.13312  |
| 515                    | 13 | 137    | -10.93 | 1.50  | 955.18      | 979.73  | 842.86   | 4332.17   | 12118.56  | 852.60 | 18.87    | 846.26 | 42.97    | 944.29  | 831.46   | 935.95  | 785.13  | --2601.13265  |
| 516                    | 13 | 138    | -10.93 | 1.50  | 955.18      | 975.04  | 551.41   | -11875.54 | 37938.90  | 851.06 | 11.47    | 844.67 | 27.43    | 931.73  | 560.65   | 928.59  | 541.36  | --2601.13263  |
| 517                    | 13 | 139    | -10.91 | 1.52  | 955.18      | 971.42  | 790.51   | -1682.10  | 8547.80   | 851.95 | 18.08    | 845.27 | 41.65    | 930.18  | 789.48   | 922.30  | 754.93  | --2601.13215  |
| 518                    | 13 | 140    | -10.88 | 1.55  | 955.18      | 1014.24 | 199.29   | -15113.55 | 48271.40  | 851.33 | 3.45     | 845.71 | 4.48     | 964.21  | 202.77   | 951.20  | 209.31  | --2601.13158  |
| 519                    | 13 | 141    | -10.83 | 1.60  | 955.18      | 1036.69 | 680.06   | 514.43    | 2755.12   | 853.00 | 12.96    | 847.40 | 28.41    | 1000.57 | 681.27   | 994.37  | 646.70  | --2601.13061  |
| 520                    | 13 | 142    | -10.79 | 1.64  | 955.18      | 977.83  | 819.61   | -2216.57  | 10558.01  | 852.83 | 19.58    | 846.69 | 44.75    | 943.52  | 822.77   | 935.49  | 786.65  | --2601.12979  |
| 521                    | 13 | 143    | -10.79 | 1.64  | 955.18      | 975.69  | 813.84   | 11101.08  | 29788.13  | 852.30 | 17.99    | 846.02 | 41.33    | 940.51  | 794.17   | 929.99  | 743.03  | --2601.12978  |
| 522                    | 13 | 144    | -10.79 | 1.64  | 955.18      | 1047.45 | 814.73   | 1482.30   | 6123.96   | 853.31 | 15.31    | 847.63 | 31.83    | 1008.83 | 795.02   | 1001.51 | 744.42  | --2601.12963  |
| 523                    | 13 | 145    | -10.78 | 1.65  | 955.18      | 984.57  | 826.03   | -18568.63 | 59550.88  | 852.66 | 18.27    | 846.82 | 41.80    | 959.17  | 824.59   | 948.11  | 772.77  | --2601.12949  |
| 524                    | 13 | 146    | -10.74 | 1.69  | 955.18      | 981.70  | 857.39   | -511.11   | 5067.25   | 853.10 | 20.03    | 847.15 | 45.12    | 949.41  | 863.75   | 942.41  | 832.70  | --2601.12874  |
| 525                    | 13 | 147    | -10.71 | 1.72  | 955.18      | 945.61  | 367.07   | 2425.63   | 3872.46   | 849.97 | 8.21     | 843.68 | 20.44    | 905.51  | 345.30   | 907.03  | 330.44  | --2601.12808  |
| 526                    | 13 | 148    | -10.71 | 1.72  | 955.18      | 992.07  | 822.37   | 68364.90  | 206404.58 | 852.81 | 18.16    | 847.11 | 41.46    | 959.98  | 810.73   | 949.58  | 759.48  | --2601.12806  |
| 527                    | 13 | 149    | -10.71 | 1.72  | 955.18      | 1001.40 | 884.35   | -1589.93  | 8528.50   | 854.07 | 20.92    | 848.51 | 45.66    | 968.37  | 885.28   | 959.47  | 849.63  | --2601.12804  |
| 528                    | 13 | 150    | -10.68 | 1.75  | 955.18      | 1066.84 | 445.21   | 28313.24  | 86803.02  | 854.04 | 8.49     | 850.10 | 18.24    | 1041.13 | 449.02   | 1042.98 | 438.40  | --2601.12744  |
| 529                    | 13 | 151    | -10.66 | 1.77  | 955.18      | 1043.70 | 569.24   | -9749.12  | 31197.63  | 853.53 | 11.11    | 849.05 | 25.21    | 1017.50 | 585.72   | 1011.58 | 564.05  | --2601.12699  |
| 530                    | 13 | 152    | -10.61 | 1.82  | 955.18      | 1067.45 | 875.71   | -506.54   | 3231.49   | 854.65 | 17.32    | 849.84 | 35.28    | 1028.09 | 851.63   | 1013.63 | 791.56  | --2601.12607  |
| 531                    | 13 | 153    | -10.56 | 1.87  | 955.18      | 1010.03 | 817.57   | -433.81   | 6099.00   | 854.18 | 20.20    | 849.01 | 44.20    | 980.59  | 829.18   | 969.53  | 784.05  | --2601.12502  |
| 532                    | 13 | 154    | -10.54 | 1.89  | 955.18      | 1004.40 | 868.76   | -3779.24  | 15778.03  | 853.70 | 19.51    | 848.35 | 43.99    | 974.80  | 875.69   | 959.49  | 820.58  | --2601.12461  |
| 533                    | 13 | 155    | -10.53 | 1.90  | 955.18      | 1030.76 | 891.28   | 857.59    | 5484.86   | 855.15 | 21.09    | 850.51 | 44.88    | 1004.43 | 887.30   | 991.97  | 834.80  | --2601.12443  |
| 534                    | 13 | 156    | -10.53 | 1.90  | 955.18      | 986.25  | 574.49   | -1441.19  | 6191.56   | 852.09 | 13.68    | 846.63 | 32.26    | 958.28  | 595.45   | 949.66  | 571.35  | --2601.12429  |
| 535                    | 13 | 157    | -10.45 | 1.98  | 955.18      | 1033.42 | 838.36   | 1472.18   | 4220.46   | 853.71 | 15.96    | 848.78 | 36.85    | 979.09  | 787.60   | 970.77  | 754.97  | --2601.12262  |
| 536                    | 13 | 158    | -10.29 | 2.14  | 955.18      | 1084.03 | 1047.12  | -417.74   | 5997.42   | 856.00 | 19.92    | 851.24 | 41.12    | 1046.20 | 1037.44  | 1043.98 | 1027.71 | --2601.11935  |
| 537                    | 13 | 159    | -10.26 | 2.17  | 955.18      | 1030.76 | 927.18   | 24.14     | 4826.45   | 854.88 | 21.55    | 849.97 | 46.49    | 993.77  | 940.52   | 975.04  | 878.07  | --2601.11866  |
| 538                    | 13 | 160    | -10.24 | 2.19  | 955.18      | 1029.89 | 892.60   | 8282.32   | 20610.18  | 855.33 | 21.19    | 851.18 | 45.86    | 1007.70 | 917.41   | 987.37  | 846.97  | --2601.11827  |
| 539                    | 13 | 161    | -10.22 | 2.21  | 955.18      | 1050.55 | 997.21   | -612.38   | 5456.17   | 855.33 | 21.92    | 850.48 | 46.81    | 1009.99 | 993.50   | 994.26  | 938.08  | --2601.11781  |
| 540                    | 13 | 162    | -10.03 | 2.40  | 955.18      | 1159.96 | 1364.54  | 377.73    | 3031.02   | 859.27 | 27.54    | 855.13 | 53.68    | 1120.61 | 1321.87  | 1091.94 | 1229.08 | --2601.11407  |
| 541                    | 13 | 163    | -9.83  | 2.60  | 955.18      | 1251.18 | 1693.98  | -137.03   | 3400.20   | 863.41 | 30.58    | 858.23 | 49.76    | 1195.83 | 1621.64  | 1177.66 | 1554.48 | --2601.110982 |
| 542                    | 13 | 164    | -9.74  | 2.69  | 955.18      | 1217.79 | 1663.56  | -543.89   | 5538.22   | 864.79 | 36.18    | 861.54 | 63.87    | 1208.28 | 1693.17  | 1175.03 | 1572.07 | --2601.10800  |
| 543                    | 13 | 165    | -8.54  | 3.89  | 955.18      | 1531.22 | 1900.38  | -791.52   | 3462.58   | 871.29 | 29.72    | 868.65 | 40.13    | 1504.52 | 1932.85  | 1417.58 | 1699.67 | --2601.08303  |
| 544                    | 14 | 1*     | -12.62 | 0.00  | 1028.65     | 883.97  | 413.11   | 749.13    | 1589.30   | 905.20 | 11.69    | 895.46 | 29.80    | 822.01  | 399.62   | 832.70  | 405.18  | -2801.257306  |
| 545                    | 14 | 2      | -12.61 | 0.01  | 1028.65     | 896.37  | 360.87   | 228.06    | 4624.30   | 905.84 | 11.06    | 897.08 | 27.33    | 845.80  | 354.94   | 849.65  | 345.94  | -2801.257106  |
| 546                    | 14 | 3      | -12.58 | 0.04  | 1028.65     | 890.66  | 365.10   | 1456.61   | 1422.06   | 905.56 | 10.92    | 896.51 | 27.24    | 835.35  | 357.00   | 843.12  | 350.70  | -2801.256413  |
| 547                    | 14 | 4      | -12.58 | 0.04  | 1028.65     | 887.34  | 370.73   | 1754.59   | 1974.04   | 905.34 | 10.86    | 896.03 | 27.27    | 830.35  | 367.18   | 839.57  | 362.70  | -2801.256387  |
| 548                    | 14 | 5      | -12.57 | 0.05  | 1028.65     | 915.02  | 455.58   | -627.76   | 2123.86   | 905.64 | 11.45    | 896.39 | 31.70    | 857.53  | 487.40   | 865.04  | 490.47  | -2801.256272  |
| 549                    | 14 | 6      | -12.53 | 0.09  | 1028.65     | 910.53  | 438.42   | 1854.41   | 1684.93   | 904.83 | 11.08    | 894.53 | 31.19    | 852.37  | 448.68   | 865.03  | 457.06  | -2801.255308  |
| 550                    | 14 | 7      | -12.52 | 0.10  | 1028.65     | 879.17  | 345.99   | 806.49    | 1996.60   | 904.94 | 9.98     | 895.28 | 25.68    | 827.05  | 347.35   | 832.72  | 338.08  | -2801.255114  |
| 551                    | 14 | 8      | -12.50 | 0.12  | 1028.65     | 918.43  | 400.60   | 548.64    | 5758.16   | 906.35 | 12.02    | 897.86 | 29.33    | 868.31  | 402.27   | 872.63  | 396.78  | -2801.254596  |
| 552                    | 14 | 9      | -12.50 | 0.12  | 1028.65     | 909.82  | 400.36   | 1025.72   | 2242.61   | 905.85 | 11.57    | 896.76 | 28.82    | 860.44  | 398.68   | 865.69  | 393.70  | -2801.254551  |

| Polarizability models: |    |        |        |      | n*alp<br>Aiso | DFT results |        | AM model  |           | TL model |        | TE model |        | RP model |        | GD model |        | Etot         |
|------------------------|----|--------|--------|------|---------------|-------------|--------|-----------|-----------|----------|--------|----------|--------|----------|--------|----------|--------|--------------|
| i                      | n  | isomer | Eb     | Erel |               | Aiso        | Aaniso | Aiso      | Aaniso    | Aiso     | Aaniso | Aiso     | Aaniso | Aiso     | Aaniso | Aiso     | Aaniso |              |
| 553                    | 14 | 10     | -12.49 | 0.13 | 1028.65       | 886.51      | 344.82 | 2948.07   | 5362.81   | 905.33   | 10.18  | 896.23   | 25.60  | 827.04   | 343.69 | 833.94   | 335.26 | -2801.254308 |
| 554                    | 14 | 11     | -12.48 | 0.14 | 1028.65       | 881.91      | 326.64 | 1363.81   | 1401.15   | 905.35   | 9.92   | 896.27   | 24.94  | 831.18   | 314.47 | 835.79   | 301.22 | -2801.254243 |
| 555                    | 14 | 12     | -12.46 | 0.16 | 1028.65       | 898.43      | 324.98 | 2242.96   | 2085.92   | 905.59   | 9.50   | 896.85   | 24.15  | 853.37   | 320.27 | 856.69   | 308.27 | -2801.253784 |
| 556                    | 14 | 13     | -12.46 | 0.16 | 1028.65       | 910.32      | 374.85 | 5136.29   | 11927.12  | 906.20   | 11.33  | 897.77   | 27.79  | 858.62   | 367.84 | 862.16   | 355.53 | -2801.253639 |
| 557                    | 14 | 14     | -12.45 | 0.17 | 1028.65       | 895.23      | 393.87 | 2629.28   | 4355.01   | 905.23   | 11.13  | 895.71   | 29.22  | 832.83   | 409.37 | 840.52   | 414.54 | -2801.253480 |
| 558                    | 14 | 15     | -12.40 | 0.22 | 1028.65       | 999.04      | 777.23 | 194.38    | 4120.73   | 910.25   | 19.92  | 903.22   | 42.91  | 940.27   | 752.62 | 947.94   | 743.72 | -2801.252357 |
| 559                    | 14 | 16     | -12.37 | 0.25 | 1028.65       | 865.33      | 306.45 | 1494.59   | 1412.04   | 904.68   | 9.31   | 894.90   | 23.75  | 837.33   | 302.01 | 842.06   | 274.46 | -2801.251831 |
| 560                    | 14 | 17     | -12.37 | 0.25 | 1028.65       | 885.52      | 342.20 | 2808.40   | 3981.61   | 905.03   | 9.88   | 895.48   | 25.29  | 841.89   | 335.34 | 844.19   | 322.43 | -2801.251769 |
| 561                    | 14 | 18     | -12.35 | 0.27 | 1028.65       | 932.53      | 391.12 | 2105.96   | 1785.38   | 906.81   | 11.15  | 898.96   | 27.18  | 886.79   | 380.22 | 888.90   | 359.16 | -2801.251277 |
| 562                    | 14 | 19     | -12.33 | 0.29 | 1028.65       | 927.12      | 406.69 | 5043.33   | 10415.54  | 906.49   | 12.00  | 898.18   | 29.23  | 874.96   | 411.12 | 879.67   | 403.79 | -2801.250876 |
| 563                    | 14 | 20     | -12.32 | 0.30 | 1028.65       | 911.10      | 431.40 | 3260.82   | 5601.46   | 905.88   | 11.30  | 896.99   | 28.61  | 855.59   | 429.34 | 862.99   | 424.00 | -2801.250674 |
| 564                    | 14 | 21     | -12.32 | 0.30 | 1028.65       | 910.94      | 369.87 | 631.48    | 2941.22   | 905.65   | 9.27   | 896.86   | 25.31  | 862.28   | 369.45 | 864.41   | 355.67 | -2801.250613 |
| 565                    | 14 | 22     | -12.32 | 0.30 | 1028.65       | 919.38      | 357.13 | 743.32    | 4147.63   | 905.86   | 9.77   | 897.20   | 24.74  | 881.64   | 366.74 | 885.70   | 344.68 | -2801.250541 |
| 566                    | 14 | 23     | -12.30 | 0.32 | 1028.65       | 932.16      | 432.03 | 2796.65   | 4325.00   | 906.90   | 12.44  | 898.84   | 29.84  | 885.38   | 449.52 | 888.93   | 441.73 | -2801.250126 |
| 567                    | 14 | 24     | -12.26 | 0.36 | 1028.65       | 894.63      | 374.68 | 2225.62   | 3072.85   | 905.48   | 10.79  | 896.27   | 28.00  | 845.20   | 382.62 | 850.06   | 377.54 | -2801.249375 |
| 568                    | 14 | 25     | -12.20 | 0.42 | 1028.65       | 907.00      | 396.28 | 1803.30   | 1776.80   | 905.55   | 10.32  | 896.41   | 28.38  | 857.38   | 384.68 | 859.92   | 376.93 | -2801.247950 |
| 569                    | 14 | 26     | -12.20 | 0.42 | 1028.65       | 933.58      | 413.65 | 2482.30   | 3209.92   | 906.19   | 11.21  | 897.49   | 28.54  | 893.03   | 426.09 | 899.33   | 420.35 | -2801.247926 |
| 570                    | 14 | 27     | -12.19 | 0.43 | 1028.65       | 943.98      | 344.16 | 149773.99 | 443019.61 | 906.31   | 9.72   | 898.05   | 24.33  | 909.61   | 341.42 | 913.51   | 319.80 | -2801.247769 |
| 571                    | 14 | 28     | -12.18 | 0.44 | 1028.65       | 940.28      | 422.81 | 2269.99   | 2205.38   | 905.87   | 9.80   | 897.24   | 26.74  | 883.81   | 426.15 | 893.10   | 423.59 | -2801.247394 |
| 572                    | 14 | 29     | -12.16 | 0.46 | 1028.65       | 951.68      | 738.55 | 112943.23 | 336635.93 | 907.19   | 16.75  | 898.57   | 40.28  | 891.30   | 721.99 | 894.99   | 704.47 | -2801.247150 |
| 573                    | 14 | 30     | -12.16 | 0.46 | 1028.65       | 959.55      | 479.76 | 1752.30   | 7718.77   | 907.17   | 11.90  | 899.34   | 31.37  | 921.80   | 498.44 | 929.70   | 499.78 | -2801.247096 |
| 574                    | 14 | 31     | -12.12 | 0.50 | 1028.65       | 933.88      | 492.39 | -10987.48 | 36573.13  | 906.35   | 12.86  | 897.64   | 32.01  | 884.52   | 509.86 | 895.57   | 521.89 | -2801.246231 |
| 575                    | 14 | 32     | -12.10 | 0.52 | 1028.65       | 914.25      | 396.21 | 18697.01  | 49923.52  | 906.07   | 11.26  | 897.41   | 27.95  | 857.33   | 391.90 | 863.48   | 384.21 | -2801.245807 |
| 576                    | 14 | 33     | -12.10 | 0.52 | 1028.65       | 943.15      | 668.13 | 3860.92   | 9191.78   | 906.91   | 15.80  | 898.15   | 37.95  | 885.11   | 653.02 | 890.42   | 637.57 | -2801.245608 |
| 577                    | 14 | 34     | -12.09 | 0.53 | 1028.65       | 913.38      | 408.25 | 2262.98   | 3660.58   | 905.74   | 11.13  | 896.72   | 28.54  | 855.58   | 428.79 | 860.72   | 424.43 | -2801.245413 |
| 578                    | 14 | 35     | -12.05 | 0.57 | 1028.65       | 958.23      | 422.84 | 8495.93   | 19312.11  | 906.85   | 9.82   | 899.26   | 26.21  | 904.82   | 425.19 | 909.66   | 413.66 | -2801.244633 |
| 579                    | 14 | 36     | -12.02 | 0.60 | 1028.65       | 954.49      | 398.50 | -13651.47 | 46390.05  | 906.86   | 9.48   | 899.34   | 25.43  | 902.83   | 384.26 | 906.71   | 374.69 | -2801.243911 |
| 580                    | 14 | 37     | -12.01 | 0.61 | 1028.65       | 954.22      | 370.69 | 2802.30   | 2330.34   | 906.51   | 9.53   | 898.63   | 24.02  | 905.66   | 372.88 | 908.29   | 356.64 | -2801.243800 |
| 581                    | 14 | 38     | -12.01 | 0.61 | 1028.65       | 907.51      | 396.10 | -1452.66  | 10013.74  | 905.64   | 10.63  | 896.65   | 27.19  | 862.88   | 387.37 | 868.15   | 381.35 | -2801.243698 |
| 582                    | 14 | 39     | -11.95 | 0.67 | 1028.65       | 959.47      | 381.04 | 2776.08   | 2761.63   | 906.40   | 8.66   | 898.54   | 23.60  | 913.42   | 363.48 | 919.88   | 352.05 | -2801.242392 |
| 583                    | 14 | 40     | -11.93 | 0.69 | 1028.65       | 975.00      | 736.16 | -85798.78 | 258254.23 | 908.25   | 17.86  | 900.35   | 41.53  | 917.05   | 711.07 | 922.67   | 692.92 | -2801.241813 |
| 584                    | 14 | 41     | -11.72 | 0.90 | 1028.65       | 970.86      | 490.31 | 4202.18   | 13306.99  | 907.37   | 11.99  | 899.95   | 28.95  | 933.42   | 503.66 | 932.24   | 487.20 | -2801.237177 |
| 585                    | 14 | 42     | -11.62 | 1.00 | 1028.65       | 973.90      | 194.11 | 3198.92   | 2232.29   | 906.37   | 4.57   | 899.02   | 11.59  | 943.93   | 207.90 | 931.70   | 189.22 | -2801.234891 |
| 586                    | 14 | 43     | -11.43 | 1.19 | 1028.65       | 1019.41     | 718.59 | 2320.91   | 6857.03   | 908.98   | 16.73  | 902.33   | 39.91  | 980.32   | 721.70 | 975.62   | 691.88 | -2801.230817 |
| 587                    | 14 | 44     | -11.32 | 1.30 | 1028.65       | 997.93      | 776.34 | 4974.95   | 11625.99  | 909.83   | 19.72  | 903.41   | 46.28  | 953.72   | 747.72 | 952.26   | 723.58 | -2801.228306 |
| 588                    | 15 | 1*     | -13.53 | 0.00 | 1102.12       | 893.45      | 263.76 | 1423.95   | 343.40    | 961.38   | 8.88   | 951.85   | 22.22  | 841.01   | 253.60 | 849.04   | 236.72 | -3001.368988 |
| 589                    | 15 | 2      | -13.37 | 0.16 | 1102.12       | 928.86      | 319.84 | 4597.08   | 10360.27  | 962.14   | 11.11  | 953.13   | 27.14  | 875.37   | 325.00 | 883.80   | 319.57 | -3001.365066 |
| 590                    | 15 | 3      | -13.34 | 0.19 | 1102.12       | 941.88      | 340.18 | 698.65    | 1642.49   | 962.70   | 12.13  | 954.13   | 29.19  | 889.50   | 352.23 | 896.19   | 349.03 | -3001.364408 |
| 591                    | 15 | 4      | -13.30 | 0.23 | 1102.12       | 912.05      | 329.26 | 1698.58   | 1485.53   | 960.94   | 10.50  | 950.31   | 26.93  | 874.14   | 325.93 | 884.80   | 321.35 | -3001.363328 |
| 592                    | 15 | 5      | -13.08 | 0.45 | 1102.12       | 903.71      | 312.73 | 1399.48   | 1155.04   | 960.90   | 10.13  | 950.44   | 25.43  | 869.23   | 307.79 | 874.22   | 297.14 | -3001.358222 |
| 593                    | 15 | 6      | -13.02 | 0.51 | 1102.12       | 905.97      | 326.86 | 525.90    | 3903.65   | 961.15   | 10.33  | 950.97   | 26.14  | 875.01   | 324.18 | 876.36   | 304.77 | -3001.356777 |
| 594                    | 15 | 7      | -13.02 | 0.51 | 1102.12       | 947.46      | 359.18 | 1703.29   | 1971.91   | 962.64   | 11.79  | 954.04   | 28.79  | 895.24   | 360.50 | 902.28   | 358.09 | -3001.356654 |
| 595                    | 15 | 8      | -12.84 | 0.69 | 1102.12       | 953.06      | 352.83 | 1688.04   | 2117.71   | 962.63   | 11.40  | 953.89   | 27.55  | 914.35   | 357.74 | 919.32   | 348.46 | -3001.352278 |
| 596                    | 15 | 9      | -12.82 | 0.71 | 1102.12       | 951.49      | 367.75 | 1392.17   | 977.93    | 962.60   | 10.69  | 953.94   | 28.05  | 895.53   | 361.67 | 899.31   | 356.13 | -3001.352016 |
| 597                    | 15 | 10     | -12.80 | 0.73 | 1102.12       | 950.25      | 413.78 | 3804.55   | 7977.07   | 962.99   | 12.99  | 954.52   | 31.87  | 894.16   | 426.02 | 903.35   | 435.57 | -3001.351534 |
| 598                    | 15 | 11     | -12.78 | 0.75 | 1102.12       | 947.26      | 364.86 | 1392.87   | 1719.59   | 962.33   | 10.80  | 953.42   | 28.00  | 895.35   | 354.15 | 902.25   | 347.95 | -3001.350995 |
| 599                    | 15 | 12     | -12.73 | 0.80 | 1102.12       | 985.46      | 432.27 | 1829.41   | 2450.26   | 963.81   | 12.25  | 956.02   | 31.59  | 925.41   | 415.62 | 936.89   | 424.15 | -3001.349753 |
| 600                    | 15 | 13     | -12.69 | 0.84 | 1102.12       | 961.25      | 412.98 | 1361.80   | 1971.29   | 962.44   | 12.19  | 953.29   | 30.23  | 923.33   | 429.49 | 935.38   | 438.86 | -3001.348769 |
| 601                    | 15 | 14     | -12.66 | 0.87 | 1102.12       | 982.62      | 364.11 | 32507.56  | 92409.43  | 963.12   | 10.76  | 955.00   | 28.17  | 925.49   | 351.75 | 931.26   | 343.79 | -3001.348188 |
| 602                    | 15 | 15     | -12.66 | 0.87 | 1102.12       | 964.64      | 361.24 | -2.74     | 5810.35   | 963.00   | 10.24  | 954.95   | 25.04  | 913.36   | 357.71 | 921.15   | 343.01 | -3001.348056 |
| 603                    | 15 | 16     | -12.63 | 0.90 | 1102.12       | 966.40      | 376.85 | 1021.08   | 3696.63   | 962.05   | 10.72  | 952.62   | 28.31  | 923.07   | 390.66 | 931.87   | 390.16 | -3001.347397 |

| Polarizability models: |    |        |        |      | n*alp   | DFT results |         | AM model  |          | TL model |       | TE model |       | RP model |         | GD model |         | Etot         |
|------------------------|----|--------|--------|------|---------|-------------|---------|-----------|----------|----------|-------|----------|-------|----------|---------|----------|---------|--------------|
| i                      | n  | isomer | Eb     | Erel | Aiso    | Aaiso       | Aaiso   | Aaiso     | Aaiso    | Aaiso    | Aaiso | Aaiso    | Aaiso | Aaiso    | Aaiso   | Aaiso    | Aaiso   |              |
| 604                    | 15 | 17     | -12.62 | 0.91 | 1102.12 | 980.17      | 404.24  | 1517.10   | 7029.98  | 963.48   | 12.08 | 955.65   | 30.69 | 921.67   | 405.96  | 927.49   | 408.82  | -3001.347092 |
| 605                    | 15 | 18     | -12.62 | 0.91 | 1102.12 | 958.60      | 437.01  | 5150.13   | 12665.74 | 962.23   | 12.50 | 952.91   | 33.80 | 899.12   | 451.91  | 910.66   | 465.22  | -3001.347063 |
| 606                    | 15 | 19     | -12.59 | 0.94 | 1102.12 | 948.38      | 399.17  | 1658.47   | 2236.58  | 962.07   | 11.61 | 952.78   | 30.56 | 890.19   | 381.75  | 897.07   | 383.68  | -3001.346439 |
| 607                    | 15 | 20     | -12.55 | 0.98 | 1102.12 | 963.70      | 326.54  | 2029.88   | 1447.80  | 962.65   | 9.18  | 954.34   | 23.99 | 914.23   | 313.05  | 919.28   | 299.14  | -3001.345535 |
| 608                    | 15 | 21     | -12.55 | 0.98 | 1102.12 | 1003.53     | 359.00  | 2433.19   | 1630.64  | 963.53   | 10.44 | 955.85   | 27.14 | 954.52   | 333.66  | 961.43   | 324.10  | -3001.345333 |
| 609                    | 15 | 22     | -12.50 | 1.03 | 1102.12 | 975.02      | 379.91  | 3146.21   | 3468.17  | 962.63   | 10.18 | 954.21   | 26.68 | 930.34   | 387.61  | 933.51   | 369.16  | -3001.344298 |
| 610                    | 15 | 23     | -12.45 | 1.08 | 1102.12 | 1006.19     | 726.48  | 1916.76   | 5284.87  | 964.65   | 18.99 | 956.53   | 44.48 | 942.31   | 709.80  | 947.41   | 697.11  | -3001.343148 |
| 611                    | 15 | 24     | -12.42 | 1.11 | 1102.12 | 1049.62     | 719.68  | -6735.45  | 26314.12 | 965.72   | 18.91 | 958.75   | 43.22 | 998.82   | 734.27  | 994.78   | 702.60  | -3001.342225 |
| 612                    | 15 | 25     | -12.39 | 1.14 | 1102.12 | 987.26      | 316.37  | 2609.18   | 1712.89  | 963.78   | 9.32  | 956.78   | 23.22 | 952.17   | 301.52  | 952.32   | 290.40  | -3001.341684 |
| 613                    | 15 | 26     | -12.38 | 1.15 | 1102.12 | 1011.63     | 306.82  | 2994.09   | 2390.41  | 963.66   | 9.83  | 956.22   | 24.00 | 975.91   | 311.29  | 979.80   | 294.04  | -3001.341337 |
| 614                    | 15 | 27     | -12.37 | 1.16 | 1102.12 | 1038.91     | 745.38  | 1340.03   | 1574.57  | 965.34   | 19.12 | 957.92   | 44.15 | 987.03   | 756.32  | 983.07   | 720.72  | -3001.341173 |
| 615                    | 15 | 28     | -12.35 | 1.18 | 1102.12 | 1020.64     | 731.98  | 4943.03   | 14174.53 | 964.69   | 18.64 | 956.58   | 44.06 | 965.11   | 721.73  | 970.42   | 712.74  | -3001.340723 |
| 616                    | 15 | 29     | -12.34 | 1.19 | 1102.12 | 1038.21     | 768.27  | 23354.14  | 67278.37 | 965.44   | 19.55 | 957.98   | 45.19 | 984.74   | 766.56  | 987.75   | 749.44  | -3001.340546 |
| 617                    | 15 | 30     | -12.34 | 1.19 | 1102.12 | 1023.22     | 664.56  | -698.99   | 6987.77  | 965.32   | 18.91 | 957.84   | 43.50 | 970.17   | 663.74  | 968.94   | 632.06  | -3001.340405 |
| 618                    | 15 | 31     | -12.33 | 1.20 | 1102.12 | 1040.12     | 764.86  | 1090.06   | 1696.83  | 965.63   | 19.67 | 958.16   | 45.28 | 995.37   | 776.72  | 999.16   | 759.15  | -3001.340233 |
| 619                    | 15 | 32     | -12.25 | 1.28 | 1102.12 | 979.65      | 310.07  | 1849.98   | 1795.05  | 962.33   | 9.14  | 953.70   | 23.18 | 931.03   | 300.18  | 940.54   | 302.72  | -3001.338341 |
| 620                    | 15 | 33     | -12.24 | 1.29 | 1102.12 | 1044.06     | 739.35  | -13427.09 | 50317.04 | 965.74   | 19.56 | 958.34   | 45.12 | 990.91   | 743.03  | 993.60   | 724.84  | -3001.338115 |
| 621                    | 15 | 34     | -12.20 | 1.33 | 1102.12 | 1067.23     | 716.59  | 7236.90   | 22897.19 | 966.23   | 18.58 | 959.94   | 42.61 | 1017.20  | 716.64  | 1017.33  | 698.84  | -3001.336996 |
| 622                    | 15 | 35     | -12.11 | 1.42 | 1102.12 | 1038.87     | 401.03  | 1629.32   | 2686.83  | 964.42   | 10.72 | 957.67   | 27.22 | 987.92   | 399.10  | 994.25   | 381.45  | -3001.334961 |
| 623                    | 15 | 36     | -12.04 | 1.49 | 1102.12 | 1080.49     | 794.36  | -10294.93 | 38058.83 | 967.29   | 20.38 | 961.28   | 44.79 | 1032.86  | 789.86  | 1029.09  | 752.13  | -3001.333253 |
| 624                    | 15 | 37     | -11.86 | 1.67 | 1102.12 | 1096.16     | 743.11  | -1238.46  | 6803.97  | 968.66   | 22.25 | 963.26   | 47.30 | 1058.86  | 766.18  | 1058.11  | 734.98  | -3001.328999 |
| 625                    | 15 | 38     | -11.78 | 1.75 | 1102.12 | 1174.62     | 1161.56 | 510.86    | 6672.89  | 971.14   | 27.12 | 965.39   | 53.28 | 1103.50  | 1108.91 | 1089.43  | 1037.26 | -3001.327049 |
| 626                    | 15 | 39     | -10.97 | 2.56 | 1102.12 | 1233.04     | 1198.28 | 1773.78   | 2913.41  | 973.03   | 27.93 | 969.09   | 56.88 | 1176.98  | 1151.83 | 1166.92  | 1115.06 | -3001.307793 |
| 627                    | 16 | 1*     | -13.71 | 0.00 | 1175.60 | 997.75      | 232.71  | 3912.85   | 1847.98  | 1018.05  | 10.32 | 1009.35  | 24.40 | 936.27   | 256.82  | 944.03   | 235.21  | -3201.464716 |
| 628                    | 16 | 2      | -13.69 | 0.02 | 1175.60 | 974.09      | 355.67  | 2072.02   | 1819.65  | 1016.98  | 11.20 | 1006.68  | 29.51 | 925.57   | 348.39  | 937.34   | 355.58  | -3201.464233 |
| 629                    | 16 | 3      | -13.49 | 0.22 | 1175.60 | 1008.83     | 393.72  | 4744.23   | 12658.48 | 1019.00  | 12.35 | 1010.95  | 29.12 | 947.98   | 384.63  | 957.10   | 381.50  | -3201.459142 |
| 630                    | 16 | 4      | -13.49 | 0.22 | 1175.60 | 974.21      | 243.48  | 1325.50   | 4653.88  | 1017.42  | 9.76  | 1008.07  | 23.48 | 918.60   | 244.97  | 921.36   | 229.22  | -3201.458995 |
| 631                    | 16 | 5      | -13.47 | 0.24 | 1175.60 | 950.14      | 272.34  | 1229.72   | 2118.72  | 1016.31  | 10.52 | 1005.45  | 25.84 | 902.00   | 257.41  | 909.31   | 246.47  | -3201.458660 |
| 632                    | 16 | 6      | -13.46 | 0.25 | 1175.60 | 993.62      | 317.15  | -293.16   | 6033.30  | 1017.80  | 11.51 | 1008.46  | 27.33 | 949.00   | 319.90  | 955.38   | 309.92  | -3201.458249 |
| 633                    | 16 | 7      | -13.45 | 0.26 | 1175.60 | 956.34      | 348.48  | 1307.79   | 1057.32  | 1016.88  | 11.42 | 1006.65  | 30.30 | 886.75   | 326.27  | 901.03   | 336.02  | -3201.458040 |
| 634                    | 16 | 8      | -13.44 | 0.27 | 1175.60 | 947.85      | 313.20  | 1875.30   | 2277.95  | 1016.42  | 9.95  | 1005.82  | 25.88 | 914.09   | 302.07  | 916.76   | 279.13  | -3201.457941 |
| 635                    | 16 | 9      | -13.28 | 0.43 | 1175.60 | 970.09      | 301.95  | 1263.72   | 1497.54  | 1017.45  | 9.52  | 1008.20  | 24.23 | 929.47   | 293.49  | 931.53   | 277.31  | -3201.453783 |
| 636                    | 16 | 10     | -13.16 | 0.55 | 1175.60 | 1017.55     | 404.57  | 2419.41   | 2292.43  | 1018.29  | 12.62 | 1009.24  | 32.95 | 963.60   | 408.26  | 976.76   | 418.10  | -3201.450791 |
| 637                    | 16 | 11     | -13.00 | 0.71 | 1175.60 | 1024.55     | 356.37  | 1480.91   | 2418.00  | 1019.65  | 11.53 | 1012.39  | 28.70 | 973.23   | 345.32  | 977.76   | 340.52  | -3201.446702 |
| 638                    | 16 | 12     | -12.97 | 0.74 | 1175.60 | 1052.93     | 665.08  | 4760.94   | 10067.51 | 1020.27  | 18.52 | 1011.99  | 42.62 | 1007.11  | 654.44  | 1013.88  | 631.28  | -3201.445957 |
| 639                    | 16 | 13     | -12.88 | 0.83 | 1175.60 | 1051.00     | 317.29  | 4362.64   | 7302.60  | 1019.54  | 11.08 | 1012.10  | 27.35 | 997.32   | 310.16  | 999.23   | 305.26  | -3201.443499 |
| 640                    | 16 | 14     | -12.87 | 0.84 | 1175.60 | 1070.34     | 667.02  | 984.47    | 1370.21  | 1021.72  | 19.95 | 1015.02  | 44.55 | 1007.39  | 661.98  | 1013.13  | 651.06  | -3201.443363 |
| 641                    | 16 | 15     | -12.79 | 0.92 | 1175.60 | 1089.48     | 682.25  | 2600.50   | 4419.59  | 1021.73  | 19.28 | 1015.22  | 43.62 | 1031.81  | 680.62  | 1034.05  | 660.84  | -3201.441165 |
| 642                    | 16 | 16     | -12.54 | 1.17 | 1175.60 | 1097.14     | 473.63  | -365.92   | 5816.44  | 1021.95  | 14.52 | 1016.10  | 34.82 | 1038.30  | 477.46  | 1050.08  | 490.26  | -3201.434989 |
| 643                    | 16 | 17     | -12.46 | 1.25 | 1175.60 | 1105.41     | 668.68  | 4082.80   | 6725.41  | 1021.68  | 19.16 | 1014.97  | 44.01 | 1059.82  | 665.81  | 1063.07  | 649.63  | -3201.432908 |
| 644                    | 16 | 18     | -12.41 | 1.30 | 1175.60 | 1116.04     | 752.37  | 2523.72   | 19360.66 | 1024.84  | 23.92 | 1019.92  | 51.63 | 1076.00  | 745.45  | 1072.99  | 696.21  | -3201.431513 |
| 645                    | 16 | 19     | -12.41 | 1.30 | 1175.60 | 1108.02     | 851.66  | -155.06   | 6108.13  | 1023.27  | 24.34 | 1016.75  | 53.29 | 1047.43  | 834.91  | 1056.22  | 838.95  | -3201.431453 |
| 646                    | 16 | 20     | -12.12 | 1.59 | 1175.60 | 1135.42     | 670.96  | 2253.64   | 3283.64  | 1022.72  | 18.32 | 1017.07  | 44.17 | 1084.44  | 669.81  | 1088.79  | 660.00  | -3201.424242 |
| 647                    | 16 | 21     | -11.98 | 1.73 | 1175.60 | 1179.30     | 850.11  | -663.93   | 7422.84  | 1026.48  | 25.25 | 1022.07  | 52.44 | 1138.44  | 874.90  | 1139.57  | 861.04  | -3201.420679 |
| 648                    | 16 | 22     | -11.94 | 1.77 | 1175.60 | 1198.27     | 756.89  | 1001.36   | 6987.16  | 1026.39  | 20.21 | 1023.15  | 42.54 | 1155.32  | 757.01  | 1154.45  | 727.01  | -3201.419627 |
| 649                    | 17 | 1*     | -14.68 | 0.00 | 1249.07 | 944.16      | 270.06  | 1425.06   | 901.90   | 1070.20  | 8.76  | 1058.69  | 23.06 | 928.69   | 243.87  | 921.91   | 217.92  | -3401.582481 |
| 650                    | 17 | 2      | -14.31 | 0.37 | 1249.07 | 972.81      | 259.36  | 1467.47   | 929.41   | 1071.18  | 8.27  | 1060.89  | 21.15 | 952.87   | 242.40  | 946.79   | 209.55  | -3401.572397 |
| 651                    | 17 | 3      | -14.24 | 0.44 | 1249.07 | 971.98      | 232.56  | 1783.03   | 1093.93  | 1070.98  | 7.64  | 1060.53  | 19.47 | 950.59   | 213.70  | 945.78   | 182.66  | -3401.570567 |
| 652                    | 17 | 4      | -14.08 | 0.60 | 1249.07 | 1009.63     | 304.76  | 1771.57   | 1242.01  | 1072.53  | 10.73 | 1063.45  | 27.37 | 957.36   | 303.33  | 961.78   | 297.02  | -3401.566267 |
| 653                    | 17 | 5      | -13.91 | 0.77 | 1249.07 | 1007.93     | 288.28  | 1520.72   | 1845.24  | 1072.48  | 9.85  | 1063.54  | 24.78 | 965.15   | 269.89  | 972.23   | 249.18  | -3401.561595 |
| 654                    | 17 | 6      | -13.87 | 0.81 | 1249.07 | 1010.77     | 258.12  | 2044.65   | 2060.46  | 1072.79  | 8.33  | 1064.37  | 21.15 | 967.38   | 211.44  | 970.42   | 188.02  | -3401.560659 |



| Polarizability models: |    |        |        | n*alp | DFT results |         | AM model |           | TL model  |         | TE model |         | RP model |         | GD model |         | Etot    |              |
|------------------------|----|--------|--------|-------|-------------|---------|----------|-----------|-----------|---------|----------|---------|----------|---------|----------|---------|---------|--------------|
| i                      | n  | isomer | Eb     | Erel  | Aiso        | Aaniso  | Aiso     | Aaniso    | Aiso      | Aaniso  | Aiso     | Aaniso  | Aiso     | Aaniso  | Aiso     | Aaniso  |         |              |
| 655                    | 17 | 7      | -13.83 | 0.85  | 1249.07     | 1047.00 | 204.94   | 7577.55   | 15518.18  | 1073.01 | 8.39     | 1064.79 | 20.57    | 989.62  | 212.01   | 997.58  | 198.36  | -3401.559621 |
| 656                    | 17 | 8      | -13.80 | 0.88  | 1249.07     | 1052.22 | 341.26   | 2504.01   | 2261.00   | 1074.27 | 11.58    | 1066.77 | 28.65    | 1005.35 | 344.27   | 1012.22 | 345.95  | -3401.558788 |
| 657                    | 17 | 9      | -13.75 | 0.93  | 1249.07     | 1027.24 | 207.56   | 1879.17   | 826.35    | 1072.42 | 7.71     | 1063.55 | 19.03    | 976.34  | 189.94   | 983.71  | 169.17  | -3401.557482 |
| 658                    | 17 | 10     | -13.65 | 1.03  | 1249.07     | 996.57  | 252.91   | 622.58    | 7811.71   | 1071.44 | 8.78     | 1061.38 | 21.71    | 965.26  | 207.73   | 954.22  | 209.56  | -3401.554738 |
| 659                    | 17 | 11     | -13.62 | 1.06  | 1249.07     | 1062.51 | 279.70   | 2179.19   | 1404.28   | 1074.41 | 10.85    | 1067.38 | 26.47    | 999.83  | 271.32   | 1007.72 | 271.82  | -3401.553766 |
| 660                    | 17 | 12     | -13.56 | 1.12  | 1249.07     | 1072.60 | 258.88   | -962.36   | 8709.37   | 1074.19 | 10.98    | 1066.81 | 26.13    | 1012.04 | 258.90   | 1020.76 | 259.18  | -3401.552315 |
| 661                    | 17 | 13     | -13.47 | 1.21  | 1249.07     | 1035.31 | 252.74   | 1872.67   | 2437.23   | 1072.32 | 9.39     | 1063.19 | 23.17    | 982.83  | 248.44   | 989.80  | 236.04  | -3401.549641 |
| 662                    | 17 | 14     | -13.43 | 1.25  | 1249.07     | 1093.69 | 334.17   | 792.65    | 4741.62   | 1075.48 | 12.83    | 1069.25 | 29.96    | 1028.59 | 334.79   | 1038.98 | 350.10  | -3401.548790 |
| 663                    | 17 | 15     | -13.33 | 1.35  | 1249.07     | 1112.16 | 625.46   | 5205.59   | 9670.15   | 1075.51 | 18.56    | 1067.91 | 44.00    | 1059.90 | 618.72   | 1066.24 | 606.20  | -3401.545950 |
| 664                    | 17 | 16     | -13.17 | 1.51  | 1249.07     | 1128.16 | 602.29   | -2229.81  | 8890.43   | 1077.28 | 18.63    | 1071.76 | 42.51    | 1067.70 | 592.91   | 1069.30 | 581.12  | -3401.541588 |
| 665                    | 17 | 17     | -13.14 | 1.54  | 1249.07     | 1111.08 | 610.51   | 663.71    | 4343.32   | 1075.63 | 19.18    | 1068.09 | 43.47    | 1059.36 | 601.18   | 1068.01 | 586.51  | -3401.540947 |
| 666                    | 17 | 18     | -13.13 | 1.55  | 1249.07     | 1095.12 | 623.99   | -2211.07  | 10804.42  | 1075.37 | 17.89    | 1067.59 | 41.03    | 1055.00 | 604.79   | 1053.29 | 571.65  | -3401.540629 |
| 667                    | 17 | 19     | -13.10 | 1.58  | 1249.07     | 1110.27 | 773.00   | 3974.81   | 8130.49   | 1077.94 | 25.84    | 1071.34 | 57.57    | 1052.47 | 757.55   | 1064.12 | 754.14  | -3401.539847 |
| 668                    | 17 | 20     | -13.09 | 1.59  | 1249.07     | 1127.37 | 683.65   | -268.21   | 4477.75   | 1076.74 | 17.78    | 1069.53 | 38.25    | 1083.88 | 628.84   | 1077.08 | 618.71  | -3401.539602 |
| 669                    | 17 | 21     | -13.08 | 1.60  | 1249.07     | 1092.95 | 539.64   | 1651.62   | 3695.32   | 1075.53 | 16.87    | 1068.72 | 40.77    | 1030.05 | 510.67   | 1038.08 | 508.00  | -3401.539266 |
| 670                    | 17 | 22     | -13.01 | 1.67  | 1249.07     | 1115.06 | 591.00   | 4808.29   | 9718.61   | 1075.74 | 16.28    | 1069.12 | 38.03    | 1062.52 | 576.93   | 1057.55 | 543.86  | -3401.537401 |
| 671                    | 17 | 23     | -13.01 | 1.67  | 1249.07     | 1137.56 | 616.89   | 10837.95  | 25680.06  | 1077.37 | 18.69    | 1071.77 | 43.46    | 1077.05 | 604.93   | 1080.99 | 592.55  | -3401.537228 |
| 672                    | 17 | 24     | -12.92 | 1.76  | 1249.07     | 1108.72 | 632.84   | 6295.29   | 14069.17  | 1076.78 | 20.69    | 1070.33 | 47.71    | 1052.68 | 624.60   | 1054.72 | 611.76  | -3401.534829 |
| 673                    | 17 | 25     | -12.85 | 1.83  | 1249.07     | 1143.15 | 634.39   | 35110.00  | 100205.70 | 1078.01 | 19.80    | 1073.10 | 43.49    | 1098.86 | 616.12   | 1099.25 | 600.07  | -3401.532875 |
| 674                    | 17 | 26     | -12.82 | 1.86  | 1249.07     | 1125.24 | 677.75   | 12761.23  | 34136.77  | 1077.41 | 22.55    | 1071.02 | 51.17    | 1061.10 | 678.33   | 1070.43 | 680.85  | -3401.532148 |
| 675                    | 17 | 27     | -12.80 | 1.88  | 1249.07     | 1128.12 | 525.58   | -19937.24 | 66726.41  | 1075.82 | 15.42    | 1069.41 | 36.77    | 1069.41 | 524.06   | 1074.64 | 508.73  | -3401.531506 |
| 676                    | 17 | 28     | -12.74 | 1.94  | 1249.07     | 1132.09 | 758.09   | 2884.38   | 3511.31   | 1077.78 | 23.84    | 1071.60 | 54.98    | 1053.11 | 736.10   | 1060.58 | 739.92  | -3401.529931 |
| 677                    | 17 | 29     | -12.69 | 1.99  | 1249.07     | 1141.16 | 660.64   | 3389.24   | 4150.76   | 1077.89 | 20.57    | 1072.80 | 48.35    | 1089.01 | 660.68   | 1088.78 | 637.14  | -3401.528626 |
| 678                    | 17 | 30     | -12.56 | 2.12  | 1249.07     | 1183.10 | 837.12   | 1406.02   | 2338.19   | 1080.03 | 25.79    | 1075.35 | 57.47    | 1113.43 | 835.55   | 1119.19 | 831.50  | -3401.525161 |
| 679                    | 17 | 31     | -12.38 | 2.30  | 1249.07     | 1190.88 | 604.92   | 1166.28   | 7398.56   | 1079.38 | 18.20    | 1075.78 | 40.38    | 1145.98 | 609.07   | 1147.19 | 592.86  | -3401.520313 |
| 680                    | 17 | 32     | -12.34 | 2.34  | 1249.07     | 1273.94 | 1312.08  | -66149.39 | 202723.71 | 1086.20 | 39.75    | 1082.31 | 77.00    | 1223.60 | 1302.54  | 1211.99 | 1238.27 | -3401.519025 |
| 681                    | 17 | 33     | -11.83 | 2.85  | 1249.07     | 1362.81 | 1239.87  | 22729.52  | 62461.80  | 1086.66 | 33.33    | 1084.13 | 61.80    | 1316.03 | 1246.18  | 1309.16 | 1204.34 | -3401.505416 |
| 682                    | 17 | 34     | -11.52 | 3.16  | 1249.07     | 1520.90 | 1771.11  | -72.63    | 4738.78   | 1092.30 | 41.70    | 1090.07 | 74.31    | 1452.78 | 1753.96  | 1442.11 | 1706.58 | -3401.497030 |
| 683                    | 17 | 35     | -11.31 | 3.37  | 1249.07     | 1567.66 | 1791.79  | -2618.69  | 8001.20   | 1096.00 | 41.80    | 1093.37 | 65.48    | 1508.67 | 1739.28  | 1472.73 | 1610.32 | -3401.491364 |
| 684                    | 18 | 1*     | -15.01 | 0.00  | 1322.55     | 1010.85 | 143.93   | 3721.01   | 4256.29   | 1124.78 | 4.90     | 1114.48 | 12.01    | 990.39  | 123.06   | 977.11  | 107.88  | -3601.685070 |
| 685                    | 18 | 2      | -14.96 | 0.05  | 1322.55     | 995.04  | 157.97   | 1288.94   | 436.62    | 1124.54 | 6.28     | 1113.95 | 15.82    | 971.69  | 140.61   | 953.98  | 121.25  | -3601.683618 |
| 686                    | 18 | 3      | -14.93 | 0.08  | 1322.55     | 1030.31 | 224.20   | 1819.74   | 1309.27   | 1125.51 | 8.26     | 1115.66 | 20.45    | 995.75  | 208.90   | 991.53  | 212.55  | -3601.682770 |
| 687                    | 18 | 4      | -14.92 | 0.09  | 1322.55     | 1009.29 | 198.27   | 1702.40   | 1164.39   | 1124.92 | 7.18     | 1114.62 | 17.87    | 986.99  | 169.07   | 971.88  | 170.97  | -3601.682467 |
| 688                    | 18 | 5      | -14.86 | 0.15  | 1322.55     | 1016.28 | 178.79   | 2144.35   | 1622.03   | 1125.17 | 6.27     | 1115.21 | 15.43    | 993.52  | 148.73   | 979.88  | 149.58  | -3601.680814 |
| 689                    | 18 | 6      | -14.82 | 0.19  | 1322.55     | 1015.53 | 198.43   | 1799.24   | 1435.02   | 1125.09 | 7.86     | 1114.98 | 19.81    | 975.13  | 191.59   | 966.24  | 171.02  | -3601.679725 |
| 690                    | 18 | 7      | -14.82 | 0.19  | 1322.55     | 989.97  | 107.90   | 597.42    | 2249.38   | 1124.51 | 4.49     | 1114.08 | 10.96    | 982.46  | 70.69    | 950.02  | 70.09   | -3601.679706 |
| 691                    | 18 | 8      | -14.72 | 0.29  | 1322.55     | 1036.78 | 257.31   | 3021.45   | 5129.98   | 1125.64 | 8.48     | 1115.92 | 21.03    | 1011.64 | 236.75   | 1003.77 | 240.23  | -3601.676804 |
| 692                    | 18 | 9      | -14.59 | 0.42  | 1322.55     | 1072.18 | 251.24   | 2649.34   | 2511.71   | 1127.02 | 9.04     | 1118.56 | 21.78    | 1035.59 | 247.85   | 1037.25 | 246.20  | -3601.673078 |
| 693                    | 18 | 10     | -14.11 | 0.90  | 1322.55     | 1082.34 | 224.61   | 2049.10   | 1127.53   | 1127.59 | 6.65     | 1120.07 | 15.50    | 1047.31 | 210.23   | 1047.77 | 204.12  | -3601.659401 |
| 694                    | 18 | 11     | -14.09 | 0.92  | 1322.55     | 1067.48 | 225.05   | 2048.27   | 1555.18   | 1127.23 | 8.71     | 1119.39 | 21.04    | 1018.00 | 218.82   | 1013.75 | 235.12  | -3601.658836 |
| 695                    | 18 | 12     | -13.68 | 1.33  | 1322.55     | 1198.69 | 669.69   | 1970.96   | 1515.12   | 1132.41 | 18.36    | 1126.88 | 39.09    | 1135.56 | 630.35   | 1136.00 | 624.51  | -3601.647065 |
| 696                    | 18 | 13     | -13.67 | 1.34  | 1322.55     | 1150.07 | 650.32   | 3618.01   | 6005.77   | 1131.29 | 22.68    | 1125.09 | 52.69    | 1105.98 | 662.35   | 1113.25 | 649.99  | -3601.646592 |
| 697                    | 18 | 14     | -13.51 | 1.50  | 1322.55     | 1171.31 | 663.34   | 1931.47   | 1811.09   | 1133.29 | 24.60    | 1128.72 | 55.71    | 1121.08 | 666.80   | 1120.47 | 645.95  | -3601.641979 |
| 698                    | 18 | 15     | -13.43 | 1.58  | 1322.55     | 1138.42 | 656.50   | 6360.03   | 16923.75  | 1131.55 | 23.22    | 1125.92 | 53.13    | 1066.15 | 628.11   | 1073.86 | 622.79  | -3601.639848 |
| 699                    | 18 | 16     | -13.43 | 1.58  | 1322.55     | 1145.81 | 635.26   | 3745.70   | 5306.97   | 1131.79 | 22.86    | 1126.30 | 53.12    | 1095.46 | 644.96   | 1094.07 | 613.29  | -3601.639772 |
| 700                    | 18 | 17     | -13.37 | 1.64  | 1322.55     | 1235.09 | 647.41   | -62555.88 | 171785.60 | 1133.53 | 18.20    | 1129.44 | 39.95    | 1188.24 | 636.89   | 1187.80 | 624.17  | -3601.638001 |
| 701                    | 18 | 18     | -13.23 | 1.78  | 1322.55     | 1188.03 | 556.48   | 5591.73   | 11602.51  | 1131.45 | 17.12    | 1126.60 | 39.91    | 1123.76 | 535.49   | 1129.46 | 526.20  | -3601.634101 |
| 702                    | 18 | 19     | -13.15 | 1.86  | 1322.55     | 1203.69 | 586.40   | 3123.35   | 2697.01   | 1131.72 | 18.98    | 1126.98 | 43.56    | 1149.53 | 591.16   | 1152.03 | 586.39  | -3601.631658 |
| 703                    | 18 | 20     | -13.13 | 1.88  | 1322.55     | 1172.55 | 516.46   | 3328.09   | 3678.26   | 1130.59 | 17.36    | 1124.95 | 39.62    | 1123.77 | 522.33   | 1123.35 | 489.52  | -3601.631164 |
| 704                    | 18 | 21     | -13.09 | 1.92  | 1322.55     | 1172.95 | 649.79   | 2875.89   | 5216.87   | 1131.92 | 20.70    | 1126.64 | 47.30    | 1104.37 | 617.63   | 1115.55 | 621.33  | -3601.630070 |
| 705                    | 18 | 22     | -13.07 | 1.94  | 1322.55     | 1204.34 | 738.31   | 12696.99  | 34083.19  | 1132.76 | 23.92    | 1127.80 | 54.53    | 1154.02 | 734.69   | 1158.44 | 720.65  | -3601.629585 |

| Polarizability models: |    |        |        |      | n*alp   | DFT results |         | AM model  |           | TL model |       | TE model |       | RP model |         | GD model |         | Etot         |
|------------------------|----|--------|--------|------|---------|-------------|---------|-----------|-----------|----------|-------|----------|-------|----------|---------|----------|---------|--------------|
| i                      | n  | isomer | Eb     | Erel | Aiso    | Aaiso       | Aaiso   | Aaiso     | Aaiso     | Aaiso    | Aaiso | Aaiso    | Aaiso | Aaiso    | Aaiso   | Aaiso    | Aaiso   |              |
| 706                    | 18 | 23     | -13.06 | 1.95 | 1322.55 | 1203.81     | 479.06  | 50648.30  | 129878.38 | 1132.65  | 16.01 | 1129.11  | 35.83 | 1148.43  | 473.74  | 1147.27  | 457.50  | -3601.629296 |
| 707                    | 19 | 1*     | -15.62 | 0.00 | 1396.02 | 1058.19     | 163.84  | 1558.87   | 1321.84   | 1178.54  | 6.16  | 1168.98  | 14.69 | 1022.57  | 130.11  | 1007.38  | 158.63  | -3801.797339 |
| 708                    | 19 | 2      | -15.52 | 0.10 | 1396.02 | 1088.11     | 107.22  | 2110.85   | 1028.26   | 1178.87  | 4.67  | 1169.66  | 11.24 | 1041.10  | 112.78  | 1040.23  | 102.79  | -3801.794159 |
| 709                    | 19 | 3      | -15.51 | 0.11 | 1396.02 | 1079.98     | 140.04  | 4390.93   | 6460.93   | 1178.93  | 5.15  | 1169.76  | 12.40 | 1037.86  | 121.16  | 1034.29  | 131.79  | -3801.793940 |
| 710                    | 19 | 4      | -15.44 | 0.18 | 1396.02 | 1067.12     | 167.52  | 2511.09   | 2655.90   | 1178.67  | 6.47  | 1169.23  | 15.78 | 1023.37  | 146.65  | 1016.09  | 156.67  | -3801.791717 |
| 711                    | 19 | 5      | -15.42 | 0.20 | 1396.02 | 1067.58     | 107.43  | 1880.88   | 778.57    | 1178.57  | 2.70  | 1169.19  | 6.44  | 1038.40  | 72.30   | 1023.61  | 98.27   | -3801.791042 |
| 712                    | 19 | 6      | -15.37 | 0.25 | 1396.02 | 1082.73     | 145.37  | 1813.38   | 709.38    | 1178.96  | 5.33  | 1169.86  | 12.82 | 1040.96  | 126.44  | 1035.77  | 137.87  | -3801.789742 |
| 713                    | 19 | 7      | -15.08 | 0.54 | 1396.02 | 1095.00     | 127.29  | 1954.35   | 1078.40   | 1179.64  | 5.11  | 1171.28  | 12.49 | 1047.75  | 120.76  | 1046.28  | 108.47  | -3801.780937 |
| 714                    | 19 | 8      | -15.06 | 0.56 | 1396.02 | 1102.33     | 204.84  | 613.97    | 3945.39   | 1179.65  | 6.33  | 1171.17  | 14.95 | 1069.80  | 187.43  | 1063.62  | 212.70  | -3801.780243 |
| 715                    | 19 | 9      | -14.24 | 1.38 | 1396.02 | 1206.16     | 591.84  | 56.88     | 4366.56   | 1184.14  | 16.71 | 1178.13  | 35.03 | 1170.49  | 538.06  | 1151.27  | 508.31  | -3801.755395 |
| 716                    | 19 | 10     | -13.76 | 1.86 | 1396.02 | 1207.11     | 686.74  | 1494.87   | 1186.75   | 1186.04  | 25.89 | 1181.27  | 57.38 | 1132.42  | 653.59  | 1147.73  | 658.51  | -3801.740949 |
| 717                    | 19 | 11     | -13.54 | 2.08 | 1396.02 | 1219.72     | 811.29  | 1989.90   | 3120.38   | 1188.13  | 32.69 | 1183.27  | 67.82 | 1149.78  | 810.60  | 1163.88  | 801.14  | -3801.734358 |
| 718                    | 19 | 12     | -13.49 | 2.13 | 1396.02 | 1242.89     | 744.72  | 3163.41   | 5284.17   | 1188.89  | 30.46 | 1185.41  | 63.54 | 1188.91  | 758.83  | 1194.75  | 748.32  | -3801.732760 |
| 719                    | 19 | 13     | -13.38 | 2.24 | 1396.02 | 1252.18     | 686.01  | 37.23     | 6084.99   | 1188.02  | 26.88 | 1184.71  | 57.69 | 1184.49  | 681.18  | 1192.54  | 683.50  | -3801.729414 |
| 720                    | 19 | 14     | -13.02 | 2.60 | 1396.02 | 1368.12     | 1138.30 | 878.33    | 2046.35   | 1191.90  | 35.17 | 1188.98  | 70.83 | 1290.43  | 1091.94 | 1298.27  | 1075.71 | -3801.718532 |
| 721                    | 19 | 15     | -12.77 | 2.85 | 1396.02 | 1361.77     | 839.86  | -421.82   | 5972.31   | 1192.46  | 31.25 | 1191.21  | 62.15 | 1310.25  | 873.16  | 1312.47  | 859.40  | -3801.710890 |
| 722                    | 20 | 1*     | -16.23 | 0.00 | 1469.50 | 1137.87     | 82.48   | 2492.48   | 1290.81   | 1232.11  | 2.18  | 1223.91  | 4.64  | 1083.05  | 76.32   | 1087.09  | 106.03  | -4001.911195 |
| 723                    | 20 | 2      | -16.10 | 0.13 | 1469.50 | 1124.23     | 83.08   | 2272.76   | 1132.16   | 1231.60  | 2.39  | 1223.02  | 5.55  | 1070.90  | 76.53   | 1067.86  | 103.78  | -4001.907113 |
| 724                    | 20 | 3      | -16.08 | 0.15 | 1469.50 | 1125.09     | 47.19   | 2047.45   | 619.38    | 1231.40  | 0.57  | 1222.66  | 1.19  | 1064.41  | 42.42   | 1061.31  | 58.71   | -4001.906578 |
| 725                    | 20 | 4      | -15.90 | 0.33 | 1469.50 | 1168.24     | 57.04   | 2667.46   | 631.09    | 1233.29  | 1.42  | 1226.11  | 2.44  | 1118.08  | 72.48   | 1122.93  | 72.96   | -4001.900667 |
| 726                    | 20 | 5      | -15.88 | 0.35 | 1469.50 | 1133.52     | 79.91   | 2784.03   | 2443.99   | 1232.05  | 2.80  | 1223.98  | 6.19  | 1075.68  | 69.74   | 1076.08  | 97.36   | -4001.900006 |
| 727                    | 20 | 6      | -15.87 | 0.36 | 1469.50 | 1150.20     | 99.67   | 2833.30   | 948.88    | 1232.58  | 3.32  | 1224.91  | 7.99  | 1098.11  | 89.40   | 1104.98  | 119.54  | -4001.899622 |
| 728                    | 20 | 7      | -15.68 | 0.55 | 1469.50 | 1136.77     | 82.14   | 2313.18   | 1435.95   | 1231.95  | 3.36  | 1223.80  | 7.80  | 1075.76  | 69.72   | 1078.06  | 105.59  | -4001.893814 |
| 729                    | 20 | 8      | -15.65 | 0.58 | 1469.50 | 1122.35     | 80.04   | 2456.85   | 2128.31   | 1231.28  | 3.40  | 1222.46  | 8.25  | 1056.25  | 53.73   | 1060.54  | 91.31   | -4001.892691 |
| 730                    | 20 | 9      | -15.47 | 0.76 | 1469.50 | 1161.58     | 81.80   | 1523.86   | 1259.83   | 1232.75  | 3.23  | 1225.26  | 7.20  | 1100.77  | 94.73   | 1107.23  | 101.20  | -4001.887140 |
| 731                    | 20 | 10     | -15.45 | 0.78 | 1469.50 | 1151.50     | 139.46  | 3086.26   | 2839.72   | 1232.59  | 4.77  | 1224.88  | 10.69 | 1104.27  | 132.40  | 1101.83  | 171.03  | -4001.886343 |
| 732                    | 20 | 11     | -15.21 | 1.02 | 1469.50 | 1180.77     | 461.40  | 2207.68   | 2410.66   | 1234.17  | 13.63 | 1227.58  | 30.19 | 1143.84  | 437.14  | 1124.93  | 448.19  | -4001.878604 |
| 733                    | 20 | 12     | -15.12 | 1.11 | 1469.50 | 1220.23     | 465.34  | 3576.12   | 6086.76   | 1236.28  | 13.35 | 1230.69  | 26.55 | 1172.31  | 408.92  | 1149.89  | 408.40  | -4001.875771 |
| 734                    | 20 | 13     | -15.10 | 1.13 | 1469.50 | 1190.72     | 483.31  | 2469.16   | 3076.40   | 1234.68  | 15.21 | 1228.24  | 33.30 | 1151.09  | 463.26  | 1139.78  | 484.99  | -4001.875247 |
| 735                    | 20 | 14     | -15.03 | 1.20 | 1469.50 | 1194.67     | 489.24  | 4315.44   | 8281.75   | 1234.77  | 15.55 | 1228.28  | 34.17 | 1146.26  | 462.97  | 1138.85  | 476.37  | -4001.872824 |
| 736                    | 20 | 15     | -15.01 | 1.22 | 1469.50 | 1201.48     | 427.00  | 2557.04   | 2222.86   | 1234.41  | 12.50 | 1228.11  | 27.94 | 1157.73  | 411.50  | 1146.77  | 402.18  | -4001.872318 |
| 737                    | 20 | 16     | -15.00 | 1.23 | 1469.50 | 1186.91     | 436.94  | 2214.42   | 2763.41   | 1234.18  | 13.19 | 1227.61  | 29.38 | 1139.81  | 417.25  | 1129.82  | 419.84  | -4001.871870 |
| 738                    | 20 | 17     | -14.92 | 1.31 | 1469.50 | 1231.05     | 505.27  | 2604.00   | 2885.02   | 1236.05  | 14.61 | 1230.39  | 30.17 | 1182.96  | 469.18  | 1173.03  | 471.43  | -4001.869593 |
| 739                    | 20 | 18     | -14.89 | 1.34 | 1469.50 | 1205.34     | 395.47  | 3481.76   | 3874.62   | 1235.12  | 11.40 | 1229.61  | 25.25 | 1161.96  | 375.60  | 1158.71  | 370.17  | -4001.868503 |
| 740                    | 20 | 19     | -14.85 | 1.38 | 1469.50 | 1161.59     | 408.07  | 2118.45   | 2093.83   | 1233.54  | 13.90 | 1226.32  | 31.45 | 1126.74  | 388.69  | 1107.48  | 380.27  | -4001.867180 |
| 741                    | 20 | 20     | -14.83 | 1.40 | 1469.50 | 1234.75     | 420.12  | 31204.87  | 83889.38  | 1236.08  | 12.53 | 1231.11  | 27.32 | 1188.87  | 398.47  | 1182.87  | 396.99  | -4001.866647 |
| 742                    | 20 | 21     | -14.78 | 1.45 | 1469.50 | 1231.82     | 424.84  | -1426.74  | 10293.91  | 1235.98  | 12.49 | 1230.89  | 27.24 | 1197.87  | 398.35  | 1184.57  | 392.87  | -4001.865117 |
| 743                    | 20 | 22     | -14.66 | 1.57 | 1469.50 | 1169.38     | 477.87  | 2535.03   | 3345.10   | 1235.38  | 18.71 | 1229.51  | 42.69 | 1144.13  | 470.91  | 1131.82  | 458.25  | -4001.861063 |
| 744                    | 20 | 23     | -14.54 | 1.69 | 1469.50 | 1242.55     | 480.79  | 4869.91   | 7792.19   | 1236.54  | 14.76 | 1231.69  | 32.24 | 1197.35  | 469.48  | 1195.09  | 458.68  | -4001.857508 |
| 745                    | 20 | 24     | -14.54 | 1.69 | 1469.50 | 1179.21     | 463.47  | 1864.91   | 1611.86   | 1234.90  | 15.96 | 1228.78  | 35.16 | 1154.26  | 441.52  | 1127.00  | 439.00  | -4001.857468 |
| 746                    | 20 | 25     | -14.47 | 1.76 | 1469.50 | 1206.13     | 594.82  | 3414.49   | 3588.16   | 1237.55  | 22.71 | 1233.09  | 51.14 | 1144.14  | 553.66  | 1153.70  | 567.37  | -4001.855002 |
| 747                    | 20 | 26     | -14.43 | 1.80 | 1469.50 | 1202.40     | 621.03  | 1139.35   | 2547.26   | 1237.26  | 23.54 | 1232.37  | 52.98 | 1144.44  | 577.65  | 1152.75  | 593.48  | -4001.853966 |
| 748                    | 20 | 27     | -14.30 | 1.93 | 1469.50 | 1222.96     | 505.26  | 2206.27   | 2142.48   | 1237.69  | 21.30 | 1233.80  | 47.92 | 1157.81  | 501.98  | 1169.61  | 486.10  | -4001.849707 |
| 749                    | 20 | 28     | -14.26 | 1.97 | 1469.50 | 1233.87     | 558.44  | 3252.27   | 3974.71   | 1238.31  | 21.73 | 1234.72  | 47.62 | 1173.39  | 532.29  | 1181.85  | 539.04  | -4001.848398 |
| 750                    | 20 | 29     | -14.25 | 1.98 | 1469.50 | 1240.66     | 576.61  | 3485.98   | 6063.50   | 1239.79  | 25.72 | 1236.73  | 55.02 | 1179.36  | 570.57  | 1191.71  | 570.08  | -4001.848187 |
| 751                    | 20 | 30     | -14.11 | 2.12 | 1469.50 | 1277.98     | 757.95  | 2545.05   | 3289.52   | 1239.26  | 27.59 | 1235.06  | 62.95 | 1214.39  | 727.67  | 1236.67  | 750.77  | -4001.843548 |
| 752                    | 20 | 31     | -14.10 | 2.13 | 1469.50 | 1333.50     | 0.02    | -95529.28 | 396.13    | 1242.08  | 0.00  | 1242.40  | 0.00  | 1288.98  | 0.03    | 1317.98  | 0.02    | -4001.843275 |
| 753                    | 20 | 32     | -14.08 | 2.15 | 1469.50 | 1220.32     | 489.78  | 2241.46   | 3357.60   | 1237.53  | 20.81 | 1233.51  | 47.40 | 1168.15  | 489.79  | 1173.95  | 470.46  | -4001.842833 |
| 754                    | 20 | 33     | -14.03 | 2.20 | 1469.50 | 1266.50     | 580.75  | 2813.85   | 3624.02   | 1240.72  | 23.89 | 1238.67  | 49.70 | 1218.86  | 584.78  | 1218.50  | 565.35  | -4001.841127 |
| 755                    | 20 | 34     | -14.02 | 2.21 | 1469.50 | 1260.47     | 644.73  | -7738.69  | 28589.11  | 1240.71  | 28.99 | 1237.55  | 59.12 | 1219.62  | 660.48  | 1222.86  | 618.62  | -4001.840705 |
| 756                    | 20 | 35     | -13.95 | 2.28 | 1469.50 | 1306.01     | 848.32  | 3258.38   | 4282.43   | 1242.29  | 32.22 | 1239.80  | 73.94 | 1244.51  | 845.61  | 1254.24  | 854.03  | -4001.838549 |

| Polarizability models: |    |        |        | n*alp | DFT results |         | AM model  |            | TL model  |         | TE model |         | RP model |         | GD model |         | Etot    |              |
|------------------------|----|--------|--------|-------|-------------|---------|-----------|------------|-----------|---------|----------|---------|----------|---------|----------|---------|---------|--------------|
| i                      | n  | isomer | Eb     | Erel  | Aiso        | Aaniso  | Aiso      | Aaniso     | Aiso      | Aaniso  | Aiso     | Aaniso  | Aiso     | Aaniso  | Aiso     | Aaniso  |         |              |
| 757                    | 20 | 36     | -13.92 | 2.31  | 1469.50     | 1269.30 | 745.19    | 7376.36    | 16094.89  | 1241.24 | 32.79    | 1237.83 | 67.31    | 1226.08 | 757.44   | 1234.10 | 737.40  | -4001.837671 |
| 758                    | 20 | 37     | -13.81 | 2.42  | 1469.50     | 1304.39 | 730.50    | 4091.86    | 5370.67   | 1242.70 | 32.09    | 1240.05 | 64.81    | 1261.48 | 767.94   | 1263.66 | 737.97  | -4001.834153 |
| 759                    | 20 | 38     | -13.80 | 2.43  | 1469.50     | 1279.84 | 787.44    | 4959.37    | 10206.93  | 1242.22 | 33.32    | 1239.59 | 68.42    | 1194.55 | 742.28   | 1209.81 | 765.61  | -4001.833754 |
| 760                    | 20 | 39     | -13.69 | 2.54  | 1469.50     | 1360.04 | 1150.92   | 1208.35    | 886.55    | 1245.41 | 42.97    | 1242.20 | 84.09    | 1314.41 | 1171.01  | 1324.81 | 1134.49 | -4001.830347 |
| 761                    | 20 | 40     | -13.69 | 2.54  | 1469.50     | 1342.89 | 522.82    | -9394.25   | 35962.67  | 1240.46 | 18.52    | 1238.78 | 38.25    | 1294.93 | 543.22   | 1301.16 | 535.78  | -4001.830270 |
| 762                    | 20 | 41     | -13.64 | 2.59  | 1469.50     | 1306.97 | 752.72    | 2464.16    | 3201.13   | 1242.77 | 31.60    | 1240.86 | 66.59    | 1230.69 | 736.68   | 1242.70 | 744.09  | -4001.828515 |
| 763                    | 20 | 42     | -13.59 | 2.64  | 1469.50     | 1328.79 | 634.12    | -7330.36   | 40350.39  | 1242.46 | 25.86    | 1241.23 | 55.71    | 1287.73 | 661.00   | 1292.75 | 656.23  | -4001.827175 |
| 764                    | 20 | 43     | -13.28 | 2.95  | 1469.50     | 1360.52 | 642.03    | 2278.67    | 8065.83   | 1241.90 | 22.49    | 1240.82 | 48.00    | 1315.93 | 634.61   | 1317.59 | 605.37  | -4001.817073 |
| 765                    | 20 | 44     | -13.25 | 2.98  | 1469.50     | 1390.92 | 1227.16   | -3481.69   | 15794.72  | 1247.52 | 45.14    | 1245.76 | 89.12    | 1320.74 | 1209.04  | 1334.28 | 1229.90 | -4001.816294 |
| 766                    | 20 | 45     | -13.25 | 2.98  | 1469.50     | 1497.57 | 1193.51   | 1763.65    | 5238.40   | 1249.07 | 36.35    | 1248.39 | 72.47    | 1437.40 | 1177.92  | 1440.32 | 1156.80 | -4001.816188 |
| 767                    | 20 | 46     | -12.99 | 3.24  | 1469.50     | 1504.92 | 978.98    | -1136.89   | 6283.24   | 1251.11 | 36.56    | 1251.96 | 67.93    | 1460.84 | 1009.92  | 1465.98 | 1004.84 | -4001.807850 |
| 768                    | 20 | 47     | -12.70 | 3.53  | 1469.50     | 1625.49 | 1343.73   | 1910.60    | 3943.17   | 1256.88 | 37.36    | 1258.36 | 69.08    | 1555.21 | 1296.80  | 1511.66 | 1186.18 | -4001.798590 |
| 769                    | 20 | 48     | -12.22 | 4.01  | 1469.50     | 1676.20 | 1727.93   | 1175.98    | 7798.07   | 1262.95 | 58.13    | 1265.04 | 98.66    | 1631.13 | 1732.48  | 1623.33 | 1694.32 | -4001.783450 |
| 770                    | 20 | 49     | -11.17 | 5.06  | 1469.50     | 2045.73 | 2846.07   | 2737.74    | 3227.86   | 1292.25 | 91.34    | 1288.25 | 110.53   | 1952.50 | 2730.78  | 1912.76 | 2602.12 | -4001.749968 |
| 771                    | 21 | 1*     | -15.83 | 0.00  | 1542.97     | 1260.06 | 378.66    | 4635.77    | 6910.39   | 1287.27 | 10.42    | 1282.29 | 21.71    | 1201.90 | 366.25   | 1199.82 | 366.60  | -4201.993305 |
| 772                    | 21 | 2      | -15.69 | 0.14  | 1542.97     | 1231.08 | 309.72    | 2282.79    | 1065.84   | 1285.70 | 7.46     | 1279.93 | 16.63    | 1170.36 | 301.75   | 1163.11 | 293.07  | -4201.988802 |
| 773                    | 21 | 3      | -15.66 | 0.17  | 1542.97     | 1316.63 | 508.94    | 1251.40    | 3168.85   | 1290.09 | 12.44    | 1285.80 | 21.25    | 1252.51 | 464.78   | 1244.31 | 461.23  | -4201.987752 |
| 774                    | 21 | 4      | -15.60 | 0.23  | 1542.97     | 1263.89 | 383.24    | 1180.54    | 3457.21   | 1287.63 | 9.72     | 1282.81 | 19.36    | 1206.51 | 367.99   | 1191.20 | 344.52  | -4201.985672 |
| 775                    | 21 | 5      | -15.50 | 0.33  | 1542.97     | 1262.16 | 324.20    | -4811.02   | 23415.61  | 1287.26 | 8.90     | 1282.63 | 19.66    | 1206.53 | 322.14   | 1208.51 | 317.24  | -4201.982209 |
| 776                    | 21 | 6      | -15.41 | 0.42  | 1542.97     | 1247.68 | 437.18    | 1741.72    | 1004.75   | 1287.06 | 13.52    | 1281.85 | 28.84    | 1195.35 | 430.40   | 1192.79 | 460.56  | -4201.979379 |
| 777                    | 21 | 7      | -15.34 | 0.49  | 1542.97     | 1148.41 | 85.76     | 1955.72    | 963.40    | 1282.59 | 2.80     | 1273.86 | 6.52     | 1088.14 | 13.32    | 1085.67 | 76.69   | -4201.977037 |
| 778                    | 21 | 8      | -15.27 | 0.56  | 1542.97     | 1264.77 | 346.33    | 2189.01    | 1514.91   | 1287.03 | 10.17    | 1282.03 | 21.60    | 1206.62 | 332.05   | 1202.22 | 321.04  | -4201.974772 |
| 779                    | 21 | 9      | -15.26 | 0.57  | 1542.97     | 1296.56 | 414.69164 | 4836.77492 | 4105.60   | 1289.43 | 12.36    | 1285.83 | 24.47    | 1233.78 | 387.32   | 1230.16 | 387.13  | -4201.974282 |
| 780                    | 21 | 10     | -15.19 | 0.64  | 1542.97     | 1263.43 | 280.94    | 2735.80    | 6682.61   | 1287.45 | 9.58     | 1283.04 | 20.39    | 1204.09 | 270.05   | 1197.43 | 253.07  | -4201.971977 |
| 781                    | 21 | 11     | -15.10 | 0.73  | 1542.97     | 1296.47 | 468.02    | 6668.45    | 14020.72  | 1289.13 | 14.46    | 1284.97 | 28.71    | 1239.64 | 438.54   | 1236.62 | 452.57  | -4201.968955 |
| 782                    | 21 | 12     | -15.09 | 0.74  | 1542.97     | 1236.70 | 550.92    | 2073.97    | 1821.46   | 1287.55 | 21.48    | 1282.06 | 47.84    | 1184.77 | 545.89   | 1196.60 | 565.42  | -4201.968532 |
| 783                    | 21 | 13     | -15.04 | 0.79  | 1542.97     | 1231.88 | 419.75    | 2058.88    | 1244.77   | 1287.76 | 16.89    | 1283.33 | 37.79    | 1193.50 | 430.81   | 1182.34 | 396.25  | -4201.966855 |
| 784                    | 21 | 14     | -15.00 | 0.83  | 1542.97     | 1224.65 | 461.68    | 3096.39    | 4271.44   | 1288.20 | 19.75    | 1283.79 | 44.53    | 1190.98 | 478.70   | 1179.89 | 463.24  | -4201.965640 |
| 785                    | 21 | 15     | -14.96 | 0.87  | 1542.97     | 1278.67 | 269.95    | 8820.54    | 15731.90  | 1288.18 | 8.90     | 1284.68 | 19.27    | 1218.53 | 266.04   | 1227.01 | 259.11  | -4201.964283 |
| 786                    | 21 | 16     | -14.93 | 0.90  | 1542.97     | 1239.26 | 493.57    | 3004.16    | 3542.10   | 1288.99 | 20.02    | 1285.19 | 43.47    | 1194.20 | 469.36   | 1192.78 | 478.80  | -4201.963199 |
| 787                    | 21 | 17     | -14.91 | 0.92  | 1542.97     | 1219.37 | 480.98    | 2451.47    | 2808.52   | 1288.32 | 20.65    | 1283.86 | 45.01    | 1168.95 | 462.60   | 1164.99 | 456.96  | -4201.962577 |
| 788                    | 21 | 18     | -14.91 | 0.92  | 1542.97     | 1228.43 | 453.01    | 2486.08    | 2483.39   | 1288.34 | 19.45    | 1284.28 | 43.71    | 1188.23 | 466.35   | 1182.28 | 452.68  | -4201.962552 |
| 789                    | 21 | 19     | -14.86 | 0.97  | 1542.97     | 1267.15 | 402.81    | 6226.92    | 11046.87  | 1289.65 | 16.67    | 1286.66 | 36.35    | 1231.89 | 422.47   | 1224.80 | 392.56  | -4201.961105 |
| 790                    | 21 | 20     | -14.80 | 1.03  | 1542.97     | 1230.05 | 470.50    | 2461.68    | 2049.45   | 1288.16 | 20.03    | 1283.68 | 44.57    | 1195.73 | 491.28   | 1197.08 | 489.53  | -4201.958806 |
| 791                    | 21 | 21     | -14.80 | 1.03  | 1542.97     | 1245.27 | 589.64    | 5645.32    | 10687.36  | 1290.89 | 24.62    | 1287.66 | 49.85    | 1228.97 | 556.97   | 1207.05 | 525.48  | -4201.958787 |
| 792                    | 21 | 22     | -14.79 | 1.04  | 1542.97     | 1300.83 | 664.30    | 4325.07    | 7785.80   | 1293.44 | 28.77    | 1291.13 | 57.85    | 1271.41 | 690.30   | 1266.35 | 651.47  | -4201.958439 |
| 793                    | 21 | 23     | -14.78 | 1.05  | 1542.97     | 1268.29 | 553.07    | 26.47      | 5223.97   | 1288.90 | 20.49    | 1284.62 | 43.69    | 1221.17 | 550.55   | 1226.01 | 559.62  | -4201.958285 |
| 794                    | 21 | 24     | -14.75 | 1.08  | 1542.97     | 1226.77 | 482.62    | 2208.22    | 2357.57   | 1287.04 | 19.76    | 1281.51 | 43.99    | 1181.16 | 463.23   | 1193.62 | 496.30  | -4201.957314 |
| 795                    | 21 | 25     | -14.74 | 1.09  | 1542.97     | 1305.43 | 573.27    | 4305.78    | 5799.43   | 1290.20 | 19.46    | 1287.02 | 41.83    | 1262.32 | 560.76   | 1250.08 | 558.79  | -4201.956783 |
| 796                    | 21 | 26     | -14.73 | 1.10  | 1542.97     | 1231.37 | 512.89    | 3339.62    | 4291.12   | 1288.53 | 22.03    | 1284.09 | 48.66    | 1173.90 | 497.00   | 1184.09 | 518.49  | -4201.956605 |
| 797                    | 21 | 27     | -14.68 | 1.15  | 1542.97     | 1245.33 | 467.00    | 2649.27    | 1867.12   | 1289.08 | 19.38    | 1285.45 | 43.55    | 1220.31 | 485.02   | 1205.94 | 445.97  | -4201.954838 |
| 798                    | 21 | 28     | -14.50 | 1.33  | 1542.97     | 1319.86 | 659.17    | 38252.68   | 108492.66 | 1294.24 | 28.80    | 1292.68 | 57.99    | 1280.59 | 676.69   | 1278.33 | 639.64  | -4201.948791 |
| 799                    | 21 | 29     | -14.38 | 1.45  | 1542.97     | 1291.50 | 631.39    | 1453.74    | 2234.54   | 1292.46 | 29.82    | 1290.01 | 62.64    | 1236.24 | 649.31   | 1251.71 | 640.62  | -4201.944715 |
| 800                    | 21 | 30     | -14.36 | 1.47  | 1542.97     | 1294.84 | 735.69    | 29475.78   | 81799.22  | 1292.85 | 30.96    | 1290.70 | 67.94    | 1230.77 | 716.80   | 1238.98 | 731.61  | -4201.944048 |
| 801                    | 21 | 31     | -14.32 | 1.51  | 1542.97     | 1283.58 | 560.10    | 3108.47    | 5259.01   | 1292.13 | 27.23    | 1289.93 | 57.21    | 1246.50 | 593.37   | 1241.81 | 570.39  | -4201.942982 |
| 802                    | 21 | 32     | -14.29 | 1.54  | 1542.97     | 1362.59 | 836.57    | 9082.38    | 16215.01  | 1296.05 | 32.64    | 1295.85 | 74.04    | 1304.12 | 835.93   | 1311.66 | 832.01  | -4201.941740 |
| 803                    | 21 | 33     | -14.12 | 1.71  | 1542.97     | 1345.92 | 690.68    | 4224.39    | 8047.42   | 1293.40 | 28.75    | 1291.72 | 62.51    | 1277.26 | 672.42   | 1292.28 | 673.04  | -4201.936022 |
| 804                    | 21 | 34     | -14.08 | 1.75  | 1542.97     | 1367.39 | 756.52    | -3393.80   | 14725.85  | 1297.47 | 34.83    | 1297.89 | 70.09    | 1313.36 | 769.07   | 1314.33 | 739.98  | -4201.934740 |
| 805                    | 21 | 35     | -14.02 | 1.81  | 1542.97     | 1360.55 | 755.06    | 4319.65    | 8373.72   | 1296.15 | 33.68    | 1295.71 | 68.76    | 1307.33 | 767.47   | 1319.04 | 767.54  | -4201.932840 |
| 806                    | 21 | 36     | -13.92 | 1.91  | 1542.97     | 1344.70 | 683.93    | 12068.14   | 31087.13  | 1293.37 | 26.50    | 1292.16 | 55.34    | 1281.52 | 681.85   | 1295.74 | 708.13  | -4201.929553 |
| 807                    | 21 | 37     | -13.60 | 2.23  | 1542.97     | 1446.33 | 1159.53   | -3746.43   | 16286.92  | 1301.15 | 46.54    | 1300.84 | 88.36    | 1364.47 | 1113.45  | 1379.42 | 1121.55 | -4201.918604 |

| Polarizability models: |    |        |        | n*alp | DFT results |         | AM model |           | TL model  |         | TE model |         | RP model |         | GD model |         | Etot    |              |
|------------------------|----|--------|--------|-------|-------------|---------|----------|-----------|-----------|---------|----------|---------|----------|---------|----------|---------|---------|--------------|
| i                      | n  | isomer | Eb     | Erel  | Aiso        | Aaniso  | Aiso     | Aaniso    | Aiso      | Aaniso  | Aiso     | Aaniso  | Aiso     | Aaniso  | Aiso     | Aaniso  |         |              |
| 808                    | 21 | 38     | -13.58 | 2.25  | 1542.97     | 1442.58 | 1136.43  | -6006.38  | 22954.65  | 1302.11 | 45.83    | 1302.03 | 85.38    | 1373.26 | 1117.78  | 1394.96 | 1143.63 | -4201.918173 |
| 809                    | 21 | 39     | -13.33 | 2.50  | 1542.97     | 1445.50 | 969.37   | -6003.06  | 24391.49  | 1300.43 | 38.30    | 1302.00 | 75.18    | 1388.24 | 964.97   | 1396.88 | 941.61  | -4201.909859 |
| 810                    | 22 | 1*     | -15.82 | 0.00  | 1616.45     | 1287.31 | 402.98   | 3095.76   | 3787.22   | 1339.20 | 15.05    | 1335.75 | 32.49    | 1235.60 | 408.97   | 1235.35 | 408.77  | -4402.087956 |
| 811                    | 22 | 2      | -15.80 | 0.02  | 1616.45     | 1310.72 | 404.42   | 4189.53   | 5727.10   | 1340.95 | 15.56    | 1338.53 | 32.02    | 1266.14 | 438.74   | 1263.81 | 423.89  | -4402.087345 |
| 812                    | 22 | 3      | -15.79 | 0.03  | 1616.45     | 1266.69 | 365.49   | 2531.50   | 2137.44   | 1338.92 | 14.32    | 1335.26 | 30.54    | 1216.02 | 378.22   | 1206.97 | 372.47  | -4402.086815 |
| 813                    | 22 | 4      | -15.77 | 0.05  | 1616.45     | 1290.62 | 386.76   | 3276.65   | 3238.96   | 1339.19 | 14.35    | 1335.85 | 30.90    | 1237.59 | 390.39   | 1239.57 | 391.83  | -4402.086250 |
| 814                    | 22 | 5      | -15.70 | 0.12  | 1616.45     | 1320.59 | 433.21   | 3317.02   | 3596.82   | 1342.17 | 17.28    | 1340.35 | 34.27    | 1273.32 | 452.14   | 1271.52 | 446.93  | -4402.083745 |
| 815                    | 22 | 6      | -15.58 | 0.24  | 1616.45     | 1266.61 | 403.53   | 3298.04   | 5052.71   | 1338.43 | 15.83    | 1334.42 | 34.69    | 1211.88 | 404.46   | 1213.68 | 426.11  | -4402.079507 |
| 816                    | 22 | 7      | -15.56 | 0.26  | 1616.45     | 1298.54 | 422.40   | 5427.36   | 9110.45   | 1340.19 | 15.49    | 1337.46 | 32.19    | 1246.25 | 439.15   | 1235.83 | 434.63  | -4402.078828 |
| 817                    | 22 | 8      | -15.51 | 0.31  | 1616.45     | 1288.24 | 387.27   | 2363.46   | 1378.48   | 1339.04 | 15.36    | 1335.47 | 32.97    | 1238.70 | 401.84   | 1240.57 | 403.42  | -4402.077009 |
| 818                    | 22 | 9      | -15.54 | 0.28  | 1616.45     | 1300.67 | 438.64   | 3106.36   | 3448.63   | 1339.87 | 15.60    | 1336.93 | 33.23    | 1238.74 | 428.70   | 1246.46 | 453.93  | -4402.078301 |
| 819                    | 22 | 10     | -15.49 | 0.33  | 1616.45     | 1269.76 | 357.32   | -4.23     | 6511.76   | 1338.35 | 14.53    | 1334.39 | 32.02    | 1220.77 | 377.25   | 1226.76 | 377.30  | -4402.076253 |
| 820                    | 22 | 11     | -15.44 | 0.38  | 1616.45     | 1359.32 | 545.33   | 57907.24  | 167560.07 | 1342.32 | 18.05    | 1340.42 | 34.79    | 1294.53 | 531.90   | 1286.32 | 528.86  | -4402.074804 |
| 821                    | 22 | 12     | -15.42 | 0.40  | 1616.45     | 1269.64 | 344.98   | 2679.97   | 2296.18   | 1339.06 | 15.40    | 1335.56 | 33.49    | 1214.05 | 339.32   | 1216.37 | 346.01  | -4402.074108 |
| 822                    | 22 | 13     | -15.38 | 0.44  | 1616.45     | 1279.20 | 447.63   | 3624.54   | 5673.06   | 1340.31 | 19.40    | 1337.42 | 40.51    | 1234.89 | 450.01   | 1224.54 | 459.50  | -4402.072442 |
| 823                    | 22 | 14     | -15.35 | 0.47  | 1616.45     | 1371.64 | 337.06   | 7871.61   | 14043.97  | 1341.66 | 10.72    | 1340.35 | 21.97    | 1315.41 | 337.86   | 1302.35 | 315.35  | -4402.071630 |
| 824                    | 22 | 15     | -15.30 | 0.52  | 1616.45     | 1275.55 | 319.34   | 1925.68   | 3650.15   | 1338.77 | 14.08    | 1335.36 | 31.23    | 1224.19 | 349.52   | 1229.31 | 343.58  | -4402.069879 |
| 825                    | 22 | 16     | -15.26 | 0.56  | 1616.45     | 1298.10 | 617.25   | 898.83    | 1975.07   | 1342.54 | 27.96    | 1340.02 | 57.10    | 1267.24 | 630.42   | 1254.21 | 618.20  | -4402.068387 |
| 826                    | 22 | 17     | -15.11 | 0.71  | 1616.45     | 1293.33 | 568.83   | 4458.39   | 7261.34   | 1341.74 | 25.77    | 1339.34 | 56.06    | 1256.95 | 576.91   | 1247.97 | 559.97  | -4402.063020 |
| 827                    | 22 | 18     | -15.07 | 0.75  | 1616.45     | 1271.39 | 520.53   | 3594.15   | 5290.96   | 1339.56 | 23.91    | 1335.30 | 51.49    | 1234.03 | 543.62   | 1247.78 | 534.75  | -4402.061796 |
| 828                    | 22 | 19     | -15.00 | 0.82  | 1616.45     | 1346.73 | 507.96   | 2914.31   | 2794.67   | 1341.28 | 18.24    | 1339.00 | 37.33    | 1273.59 | 483.40   | 1284.40 | 506.88  | -4402.059200 |
| 829                    | 22 | 20     | -14.88 | 0.94  | 1616.45     | 1330.72 | 619.95   | 88673.60  | 259825.47 | 1343.17 | 25.66    | 1341.87 | 55.70    | 1292.03 | 613.38   | 1282.44 | 612.56  | -4402.055118 |
| 830                    | 22 | 21     | -14.74 | 1.08  | 1616.45     | 1321.46 | 631.85   | -150.69   | 5788.10   | 1341.81 | 24.95    | 1339.43 | 53.87    | 1263.28 | 618.58   | 1268.19 | 623.85  | -4402.050093 |
| 831                    | 22 | 22     | -14.65 | 1.17  | 1616.45     | 1290.09 | 644.27   | 2490.37   | 2820.66   | 1342.30 | 30.50    | 1339.52 | 65.52    | 1249.08 | 677.42   | 1253.49 | 662.51  | -4402.046991 |
| 832                    | 22 | 23     | -14.59 | 1.23  | 1616.45     | 1370.00 | 551.95   | -21543.00 | 73173.47  | 1345.87 | 28.92    | 1346.22 | 58.90    | 1318.86 | 570.68   | 1324.54 | 539.23  | -4402.044991 |
| 833                    | 22 | 24     | -14.53 | 1.29  | 1616.45     | 1357.33 | 690.86   | -21808.31 | 70976.27  | 1344.89 | 28.89    | 1344.61 | 60.80    | 1287.28 | 665.38   | 1294.42 | 681.70  | -4402.042760 |
| 834                    | 22 | 25     | -14.41 | 1.41  | 1616.45     | 1390.61 | 739.93   | 4486.61   | 6022.59   | 1347.01 | 30.49    | 1347.79 | 68.28    | 1340.08 | 753.92   | 1337.49 | 737.13  | -4402.038587 |
| 835                    | 22 | 26     | -14.39 | 1.43  | 1616.45     | 1393.35 | 671.48   | -1111.45  | 10306.79  | 1345.16 | 30.49    | 1344.53 | 64.69    | 1336.03 | 685.73   | 1354.80 | 674.03  | -4402.037938 |
| 836                    | 22 | 27     | -14.39 | 1.43  | 1616.45     | 1481.12 | 703.20   | 1708.55   | 2235.77   | 1348.51 | 22.32    | 1349.34 | 38.29    | 1415.13 | 687.17   | 1418.71 | 683.81  | -4402.037712 |
| 837                    | 22 | 28     | -14.36 | 1.46  | 1616.45     | 1429.50 | 487.38   | 3313.10   | 3201.19   | 1344.96 | 14.72    | 1346.27 | 29.16    | 1349.50 | 495.49   | 1359.68 | 457.34  | -4402.036925 |
| 838                    | 22 | 29     | -14.28 | 1.54  | 1616.45     | 1438.57 | 791.92   | 5894.38   | 11983.35  | 1348.44 | 33.39    | 1349.72 | 71.86    | 1381.05 | 792.17   | 1402.48 | 816.45  | -4402.033904 |
| 839                    | 22 | 30     | -14.04 | 1.78  | 1616.45     | 1459.96 | 849.97   | -178.89   | 11946.65  | 1350.63 | 36.36    | 1352.92 | 76.99    | 1412.28 | 856.67   | 1420.82 | 865.35  | -4402.025428 |
| 840                    | 22 | 31     | -13.97 | 1.85  | 1616.45     | 1471.54 | 1118.46  | 8002.29   | 23603.56  | 1350.34 | 42.43    | 1349.99 | 79.63    | 1421.65 | 1098.88  | 1433.73 | 1092.88 | -4402.023235 |
| 841                    | 22 | 32     | -13.79 | 2.03  | 1616.45     | 1496.91 | 1116.74  | -15290.48 | 51834.29  | 1354.13 | 46.76    | 1356.29 | 88.50    | 1429.86 | 1114.07  | 1439.32 | 1105.22 | -4402.016849 |
| 842                    | 22 | 33     | -13.42 | 2.40  | 1616.45     | 1543.09 | 1080.97  | -6224.00  | 19989.37  | 1355.88 | 42.46    | 1359.09 | 78.05    | 1485.36 | 1091.53  | 1483.19 | 1074.87 | -4402.003922 |
| 843                    | 22 | 34     | -13.23 | 2.59  | 1616.45     | 1637.12 | 1245.00  | 2464.29   | 12893.26  | 1361.74 | 50.16    | 1366.66 | 88.91    | 1588.73 | 1247.03  | 1590.77 | 1224.84 | -4401.997161 |
| 844                    | 22 | 35     | -12.85 | 2.97  | 1616.45     | 1702.50 | 1348.57  | -1673.14  | 19875.84  | 1368.97 | 60.76    | 1375.43 | 98.72    | 1635.70 | 1308.77  | 1642.69 | 1291.10 | -4401.983668 |
| 845                    | 23 | 1*     | -15.95 | 0.00  | 1689.92     | 1332.01 | 446.69   | 5536.27   | 10033.07  | 1391.12 | 20.05    | 1389.51 | 42.26    | 1278.99 | 451.03   | 1282.69 | 455.82  | -4602.187622 |
| 846                    | 23 | 2      | -15.82 | 0.13  | 1689.92     | 1284.41 | 499.14   | 2815.73   | 4163.44   | 1388.94 | 24.77    | 1384.55 | 52.88    | 1240.72 | 506.09   | 1257.88 | 560.61  | -4602.182782 |
| 847                    | 23 | 3      | -15.81 | 0.14  | 1689.92     | 1292.87 | 451.80   | -2926.57  | 14100.17  | 1389.25 | 21.36    | 1385.78 | 45.76    | 1243.87 | 461.95   | 1253.77 | 500.54  | -4602.182553 |
| 848                    | 23 | 4      | -15.79 | 0.16  | 1689.92     | 1287.29 | 487.26   | 1796.56   | 2327.66   | 1389.26 | 23.14    | 1385.53 | 49.41    | 1237.27 | 500.22   | 1250.08 | 533.99  | -4602.181850 |
| 849                    | 23 | 5      | -15.73 | 0.22  | 1689.92     | 1338.21 | 463.21   | 1713.66   | 2574.17   | 1392.21 | 22.93    | 1390.84 | 47.41    | 1298.21 | 500.78   | 1295.70 | 474.94  | -4602.179565 |
| 850                    | 23 | 6      | -15.73 | 0.22  | 1689.92     | 1361.65 | 469.48   | 3150.70   | 3394.08   | 1392.86 | 19.18    | 1392.59 | 40.07    | 1311.07 | 474.26   | 1307.73 | 470.23  | -4602.179487 |
| 851                    | 23 | 7      | -15.73 | 0.22  | 1689.92     | 1323.70 | 459.48   | 2741.75   | 2059.13   | 1390.69 | 20.47    | 1388.70 | 43.16    | 1268.53 | 454.60   | 1269.63 | 471.22  | -4602.179418 |
| 852                    | 23 | 8      | -15.71 | 0.24  | 1689.92     | 1384.66 | 536.40   | 4549.67   | 6910.99   | 1394.60 | 24.28    | 1394.43 | 47.44    | 1332.55 | 549.80   | 1330.18 | 541.63  | -4602.178732 |
| 853                    | 23 | 9      | -15.69 | 0.26  | 1689.92     | 1282.64 | 463.02   | 2250.58   | 2410.05   | 1389.64 | 24.08    | 1386.15 | 50.98    | 1260.56 | 508.59   | 1256.04 | 505.09  | -4602.178241 |
| 854                    | 23 | 10     | -15.67 | 0.28  | 1689.92     | 1365.00 | 511.37   | 4898.23   | 8577.68   | 1392.20 | 19.60    | 1391.42 | 41.92    | 1305.13 | 501.24   | 1309.75 | 530.33  | -4602.177266 |
| 855                    | 23 | 11     | -15.64 | 0.31  | 1689.92     | 1329.57 | 507.44   | 2322.08   | 1639.69   | 1391.16 | 21.98    | 1389.39 | 45.75    | 1272.59 | 515.39   | 1272.43 | 532.58  | -4602.176338 |
| 856                    | 23 | 12     | -15.62 | 0.33  | 1689.92     | 1358.47 | 530.84   | 2813.22   | 3935.97   | 1392.69 | 22.41    | 1391.98 | 47.46    | 1309.76 | 532.28   | 1307.29 | 556.11  | -4602.175521 |
| 857                    | 23 | 13     | -15.61 | 0.34  | 1689.92     | 1362.17 | 461.88   | 30653.60  | 83886.55  | 1393.24 | 20.72    | 1392.84 | 44.22    | 1324.45 | 488.44   | 1312.35 | 463.38  | -4602.175070 |
| 858                    | 23 | 14     | -15.60 | 0.35  | 1689.92     | 1356.14 | 502.46   | 3032.14   | 3253.56   | 1392.92 | 22.41    | 1392.20 | 45.46    | 1317.01 | 523.46   | 1309.32 | 528.36  | -4602.174711 |

| Polarizability models: |    |        |        |      | n*alp   | DFT results |         | AM model |          | TL model |       | TE model |        | RP model |         | GD model |         | Etot         |
|------------------------|----|--------|--------|------|---------|-------------|---------|----------|----------|----------|-------|----------|--------|----------|---------|----------|---------|--------------|
| i                      | n  | isomer | Eb     | Erel | Aiso    | Aaiso       | Aaiso   | Aaiso    | Aaiso    | Aaiso    | Aaiso | Aaiso    | Aaiso  | Aaiso    | Aaiso   | Aaiso    | Aaiso   |              |
| 859                    | 23 | 15     | -15.58 | 0.37 | 1689.92 | 1299.03     | 563.80  | 798.43   | 3933.40  | 1391.43  | 28.33 | 1388.95  | 59.91  | 1285.13  | 603.07  | 1269.14  | 563.12  | -4602.174125 |
| 860                    | 23 | 16     | -15.55 | 0.40 | 1689.92 | 1406.34     | 466.38  | 3871.21  | 3916.37  | 1395.66  | 22.05 | 1396.68  | 43.22  | 1360.66  | 479.67  | 1358.04  | 452.81  | -4602.172961 |
| 861                    | 23 | 17     | -15.54 | 0.41 | 1689.92 | 1353.52     | 515.36  | 2678.25  | 3047.43  | 1391.77  | 20.96 | 1390.59  | 44.64  | 1288.82  | 500.52  | 1294.44  | 529.88  | -4602.172633 |
| 862                    | 23 | 18     | -15.50 | 0.45 | 1689.92 | 1332.59     | 446.95  | -2798.62 | 14178.28 | 1391.71  | 21.20 | 1390.57  | 44.52  | 1284.95  | 452.21  | 1282.86  | 461.57  | -4602.171137 |
| 863                    | 23 | 19     | -15.45 | 0.50 | 1689.92 | 1334.38     | 386.31  | 2473.30  | 2066.11  | 1391.41  | 18.05 | 1390.32  | 38.76  | 1290.64  | 411.70  | 1281.46  | 400.15  | -4602.169299 |
| 864                    | 23 | 20     | -15.44 | 0.51 | 1689.92 | 1337.21     | 421.25  | 1872.18  | 1165.53  | 1391.87  | 18.73 | 1391.06  | 39.88  | 1285.90  | 411.17  | 1275.81  | 416.69  | -4602.169068 |
| 865                    | 23 | 21     | -15.43 | 0.52 | 1689.92 | 1352.07     | 418.92  | 3128.93  | 2255.52  | 1391.58  | 17.26 | 1390.72  | 37.80  | 1294.48  | 411.80  | 1299.21  | 423.97  | -4602.168628 |
| 866                    | 23 | 22     | -15.40 | 0.55 | 1689.92 | 1373.03     | 476.52  | 3808.73  | 4760.64  | 1394.50  | 21.74 | 1394.93  | 42.28  | 1315.66  | 488.57  | 1309.30  | 464.05  | -4602.167657 |
| 867                    | 23 | 23     | -15.40 | 0.55 | 1689.92 | 1336.34     | 553.47  | 1441.35  | 1106.85  | 1393.90  | 27.74 | 1393.57  | 56.80  | 1309.79  | 560.70  | 1294.81  | 552.57  | -4602.167594 |
| 868                    | 23 | 24     | -15.35 | 0.60 | 1689.92 | 1323.06     | 583.01  | 2617.52  | 3532.99  | 1393.00  | 29.94 | 1391.58  | 62.10  | 1298.01  | 604.94  | 1292.56  | 603.48  | -4602.165707 |
| 869                    | 23 | 25     | -15.35 | 0.60 | 1689.92 | 1346.96     | 626.95  | 2580.44  | 4073.98  | 1395.29  | 31.73 | 1395.44  | 65.00  | 1317.94  | 658.34  | 1309.77  | 612.11  | -4602.165529 |
| 870                    | 23 | 26     | -15.35 | 0.60 | 1689.92 | 1319.93     | 634.34  | 2350.88  | 2094.78  | 1393.20  | 30.71 | 1391.81  | 64.84  | 1286.78  | 633.42  | 1282.90  | 643.09  | -4602.165521 |
| 871                    | 23 | 27     | -15.34 | 0.61 | 1689.92 | 1369.45     | 498.06  | 3396.15  | 3180.15  | 1392.33  | 20.97 | 1391.67  | 44.69  | 1305.84  | 494.02  | 1310.20  | 516.11  | -4602.165376 |
| 872                    | 23 | 28     | -15.34 | 0.61 | 1689.92 | 1383.29     | 418.40  | 2534.87  | 985.06   | 1394.60  | 20.86 | 1395.37  | 41.61  | 1331.91  | 430.90  | 1337.17  | 396.15  | -4602.165194 |
| 873                    | 23 | 29     | -15.32 | 0.63 | 1689.92 | 1362.97     | 544.63  | 3332.63  | 3965.37  | 1393.51  | 26.28 | 1392.92  | 54.80  | 1329.14  | 573.81  | 1321.95  | 570.16  | -4602.164401 |
| 874                    | 23 | 30     | -15.26 | 0.69 | 1689.92 | 1378.17     | 429.93  | 2599.54  | 1780.57  | 1393.23  | 17.29 | 1393.46  | 36.86  | 1320.24  | 432.28  | 1322.56  | 417.84  | -4602.162446 |
| 875                    | 23 | 31     | -15.24 | 0.71 | 1689.92 | 1428.89     | 570.54  | 3422.28  | 5438.19  | 1395.68  | 20.21 | 1397.04  | 39.41  | 1377.64  | 559.74  | 1361.08  | 534.70  | -4602.161463 |
| 876                    | 23 | 32     | -15.23 | 0.72 | 1689.92 | 1384.93     | 652.56  | 976.72   | 4353.84  | 1397.63  | 34.50 | 1398.91  | 69.08  | 1337.02  | 669.77  | 1339.58  | 642.69  | -4602.161219 |
| 877                    | 23 | 33     | -15.10 | 0.85 | 1689.92 | 1354.17     | 625.92  | -1653.65 | 13273.42 | 1394.97  | 31.60 | 1394.88  | 66.32  | 1313.46  | 645.19  | 1316.64  | 635.41  | -4602.156566 |
| 878                    | 23 | 34     | -15.08 | 0.87 | 1689.92 | 1341.40     | 642.55  | 2273.99  | 2805.01  | 1395.10  | 31.66 | 1395.32  | 65.87  | 1300.37  | 664.77  | 1292.49  | 653.40  | -4602.155792 |
| 879                    | 23 | 35     | -15.03 | 0.92 | 1689.92 | 1379.78     | 426.23  | 1630.29  | 1659.87  | 1394.22  | 22.82 | 1394.48  | 46.16  | 1347.01  | 475.89  | 1342.56  | 436.31  | -4602.154048 |
| 880                    | 23 | 36     | -15.01 | 0.94 | 1689.92 | 1355.18     | 585.47  | 1851.69  | 708.71   | 1393.97  | 29.14 | 1393.53  | 60.24  | 1326.14  | 617.44  | 1323.43  | 593.25  | -4602.153228 |
| 881                    | 23 | 37     | -14.76 | 1.19 | 1689.92 | 1478.58     | 824.40  | 4720.24  | 7661.04  | 1400.88  | 36.16 | 1403.73  | 79.87  | 1413.35  | 801.72  | 1430.72  | 814.12  | -4602.143997 |
| 882                    | 23 | 38     | -14.66 | 1.29 | 1689.92 | 1463.31     | 811.98  | 4516.17  | 6629.00  | 1400.38  | 37.51 | 1402.68  | 82.51  | 1398.21  | 793.49  | 1428.89  | 831.80  | -4602.140266 |
| 883                    | 23 | 39     | -14.58 | 1.37 | 1689.92 | 1449.54     | 811.53  | 3264.64  | 3347.45  | 1400.23  | 37.73 | 1402.32  | 83.45  | 1386.60  | 802.99  | 1405.74  | 810.22  | -4602.137385 |
| 884                    | 23 | 40     | -14.54 | 1.41 | 1689.92 | 1444.43     | 778.91  | 2496.00  | 4338.83  | 1399.73  | 34.34 | 1402.55  | 75.38  | 1393.19  | 762.10  | 1397.59  | 756.40  | -4602.135899 |
| 885                    | 23 | 41     | -14.51 | 1.44 | 1689.92 | 1422.07     | 637.68  | 2617.34  | 3110.41  | 1397.34  | 31.72 | 1398.97  | 68.13  | 1376.31  | 658.07  | 1389.47  | 610.63  | -4602.135047 |
| 886                    | 23 | 42     | -14.20 | 1.75 | 1689.92 | 1521.63     | 992.42  | 1951.82  | 14004.67 | 1404.22  | 44.01 | 1408.21  | 83.59  | 1444.31  | 950.96  | 1457.49  | 940.69  | -4602.123350 |
| 887                    | 23 | 43     | -14.06 | 1.89 | 1689.92 | 1514.83     | 1050.74 | 44.33    | 4310.96  | 1408.86  | 57.90 | 1411.40  | 101.43 | 1474.47  | 1143.92 | 1489.32  | 1113.79 | -4602.118420 |
| 888                    | 23 | 44     | -13.84 | 2.11 | 1689.92 | 1575.02     | 1116.11 | 283.89   | 6112.36  | 1411.16  | 53.52 | 1417.01  | 97.22  | 1549.91  | 1178.99 | 1537.24  | 1137.97 | -4602.110301 |
| 889                    | 23 | 45     | -13.79 | 2.16 | 1689.92 | 1677.15     | 1046.11 | 769.76   | 3285.81  | 1411.21  | 42.21 | 1417.13  | 79.47  | 1614.69  | 1047.16 | 1626.29  | 1057.61 | -4602.108510 |
| 890                    | 24 | 1*     | -16.21 | 0.00 | 1763.40 | 1314.77     | 502.54  | 2518.84  | 2045.92  | 1440.66  | 27.61 | 1438.80  | 57.43  | 1304.17  | 561.19  | 1281.22  | 541.48  | -4802.292625 |
| 891                    | 24 | 2      | -16.18 | 0.03 | 1763.40 | 1316.77     | 512.29  | 4991.31  | 6680.72  | 1441.16  | 28.05 | 1439.75  | 58.32  | 1310.56  | 568.54  | 1284.23  | 542.59  | -4802.291734 |
| 892                    | 24 | 3      | -16.11 | 0.10 | 1763.40 | 1321.62     | 456.87  | 2479.34  | 2057.34  | 1440.35  | 24.00 | 1438.79  | 50.28  | 1294.09  | 491.96  | 1288.28  | 498.52  | -4802.289018 |
| 893                    | 24 | 4      | -16.05 | 0.16 | 1763.40 | 1351.95     | 420.81  | 195.76   | 5156.12  | 1442.70  | 23.36 | 1443.60  | 48.25  | 1293.11  | 425.31  | 1294.20  | 419.20  | -4802.286775 |
| 894                    | 24 | 5      | -16.05 | 0.16 | 1763.40 | 1334.35     | 407.75  | 3851.25  | 4142.86  | 1440.18  | 22.64 | 1438.52  | 47.77  | 1300.78  | 459.88  | 1305.67  | 443.47  | -4802.286619 |
| 895                    | 24 | 6      | -16.01 | 0.20 | 1763.40 | 1359.19     | 459.20  | 2573.17  | 2014.04  | 1442.83  | 23.98 | 1443.40  | 49.24  | 1324.57  | 486.45  | 1310.29  | 473.91  | -4802.285157 |
| 896                    | 24 | 7      | -16.01 | 0.20 | 1763.40 | 1367.87     | 500.79  | 387.91   | 4622.95  | 1443.16  | 26.23 | 1443.62  | 53.30  | 1336.95  | 552.98  | 1322.95  | 531.33  | -4802.284871 |
| 897                    | 24 | 8      | -15.99 | 0.22 | 1763.40 | 1322.98     | 445.11  | 2119.47  | 1347.89  | 1440.58  | 24.35 | 1439.22  | 51.14  | 1293.02  | 487.84  | 1290.46  | 488.45  | -4802.284344 |
| 898                    | 24 | 9      | -15.99 | 0.22 | 1763.40 | 1340.22     | 432.70  | 2672.50  | 1881.19  | 1441.25  | 23.16 | 1440.72  | 48.43  | 1318.99  | 490.09  | 1306.43  | 462.13  | -4802.284173 |
| 899                    | 24 | 10     | -15.96 | 0.25 | 1763.40 | 1349.73     | 420.06  | 2136.17  | 1744.18  | 1441.07  | 22.30 | 1440.55  | 46.70  | 1296.56  | 447.90  | 1295.47  | 435.51  | -4802.283252 |
| 900                    | 24 | 11     | -15.96 | 0.25 | 1763.40 | 1353.18     | 615.15  | 2479.02  | 3320.91  | 1443.52  | 33.05 | 1443.18  | 67.92  | 1335.32  | 643.61  | 1318.71  | 626.25  | -4802.283222 |
| 901                    | 24 | 12     | -15.91 | 0.30 | 1763.40 | 1345.64     | 425.73  | 2100.87  | 1167.84  | 1441.31  | 23.07 | 1440.81  | 48.38  | 1321.54  | 488.69  | 1311.98  | 463.73  | -4802.281137 |
| 902                    | 24 | 13     | -15.89 | 0.32 | 1763.40 | 1357.62     | 414.61  | 2284.91  | 1065.77  | 1442.11  | 22.43 | 1442.43  | 46.63  | 1296.82  | 422.78  | 1301.32  | 418.30  | -4802.280521 |
| 903                    | 24 | 14     | -15.88 | 0.33 | 1763.40 | 1356.86     | 422.07  | 2342.30  | 1979.29  | 1442.25  | 22.39 | 1442.61  | 46.31  | 1319.50  | 448.50  | 1308.66  | 433.26  | -4802.279897 |
| 904                    | 24 | 15     | -15.87 | 0.34 | 1763.40 | 1339.39     | 449.08  | 1697.83  | 1639.49  | 1441.09  | 24.16 | 1440.16  | 50.50  | 1320.79  | 504.36  | 1304.36  | 483.14  | -4802.279562 |
| 905                    | 24 | 16     | -15.86 | 0.35 | 1763.40 | 1409.09     | 508.07  | 111.25   | 7191.90  | 1443.64  | 25.04 | 1444.64  | 50.94  | 1352.21  | 512.71  | 1353.59  | 511.90  | -4802.279188 |
| 906                    | 24 | 17     | -15.85 | 0.36 | 1763.40 | 1339.78     | 512.86  | 2394.59  | 2234.20  | 1441.32  | 26.20 | 1440.17  | 54.32  | 1311.32  | 514.97  | 1310.24  | 556.46  | -4802.278859 |
| 907                    | 24 | 18     | -15.82 | 0.39 | 1763.40 | 1357.39     | 512.14  | 4127.27  | 6507.91  | 1442.63  | 27.93 | 1442.46  | 57.04  | 1333.72  | 542.27  | 1326.28  | 531.97  | -4802.277616 |
| 908                    | 24 | 19     | -15.80 | 0.41 | 1763.40 | 1363.65     | 462.68  | 2547.70  | 2403.71  | 1443.52  | 25.19 | 1444.72  | 51.72  | 1331.98  | 492.21  | 1310.99  | 475.11  | -4802.276849 |
| 909                    | 24 | 20     | -15.79 | 0.42 | 1763.40 | 1375.81     | 500.19  | 3113.83  | 4313.94  | 1442.57  | 24.66 | 1442.86  | 51.36  | 1310.64  | 491.00  | 1316.21  | 513.41  | -4802.276634 |

| Polarizability models: |    |        |        |      | n*alp   | DFT results |         | AM model             |          | TL model |       | TE model |        | RP model |         | GD model |         | Etot         |
|------------------------|----|--------|--------|------|---------|-------------|---------|----------------------|----------|----------|-------|----------|--------|----------|---------|----------|---------|--------------|
| i                      | n  | isomer | Eb     | Erel | Aiso    | Aaiso       | Aaiso   | Aaiso                | Aaiso    | Aaiso    | Aaiso | Aaiso    | Aaiso  | Aaiso    | Aaiso   | Aaiso    | Aaiso   |              |
| 910                    | 24 | 21     | -15.78 | 0.43 | 1763.40 | 1343.21     | 399.64  | 2251.18              | 1669.54  | 1440.93  | 20.90 | 1440.45  | 44.07  | 1310.36  | 449.95  | 1308.25  | 428.15  | -4802.276193 |
| 911                    | 24 | 22     | -15.74 | 0.47 | 1763.40 | 1378.54     | 530.82  | 3040.38              | 4104.85  | 1443.27  | 26.82 | 1443.82  | 55.41  | 1329.47  | 528.09  | 1328.43  | 552.77  | -4802.274714 |
| 912                    | 24 | 23     | -15.72 | 0.49 | 1763.40 | 1422.20     | 497.64  | 3819.57              | 3787.03  | 1444.72  | 23.83 | 1446.82  | 48.55  | 1372.44  | 511.63  | 1368.62  | 504.23  | -4802.273869 |
| 913                    | 24 | 24     | -15.66 | 0.55 | 1763.40 | 1388.14     | 445.21  | 3164.25              | 3165.06  | 1443.18  | 23.84 | 1443.80  | 49.07  | 1354.94  | 485.67  | 1356.61  | 463.62  | -4802.271594 |
| 914                    | 24 | 25     | -15.63 | 0.58 | 1763.40 | 1424.84     | 486.48  | 2785.50              | 2329.44  | 1444.98  | 23.94 | 1447.12  | 48.28  | 1374.86  | 502.86  | 1368.06  | 481.31  | -4802.270582 |
| 915                    | 24 | 26     | -15.62 | 0.59 | 1763.40 | 1385.40     | 524.05  | 3145.18              | 4825.92  | 1443.21  | 25.52 | 1444.25  | 52.18  | 1302.62  | 484.08  | 1309.54  | 512.78  | -4802.270201 |
| 916                    | 24 | 27     | -15.61 | 0.60 | 1763.40 | 1385.45     | 460.89  | 2692.20              | 2549.32  | 1444.51  | 24.73 | 1446.51  | 51.27  | 1350.64  | 497.88  | 1337.70  | 483.22  | -4802.269682 |
| 917                    | 24 | 28     | -15.61 | 0.60 | 1763.40 | 1424.64     | 453.43  | 2160.48              | 3266.86  | 1444.13  | 20.82 | 1445.73  | 44.40  | 1367.47  | 475.21  | 1359.80  | 448.96  | -4802.269638 |
| 918                    | 24 | 29     | -15.60 | 0.61 | 1763.40 | 1400.34     | 561.62  | 519.66               | 4512.44  | 1446.38  | 31.23 | 1448.72  | 61.75  | 1376.23  | 598.78  | 1362.48  | 563.18  | -4802.269554 |
| 919                    | 24 | 30     | -15.60 | 0.61 | 1763.40 | 1374.47     | 584.38  | 4116.77              | 6319.78  | 1445.28  | 31.10 | 1446.91  | 63.26  | 1331.98  | 589.82  | 1325.53  | 572.87  | -4802.269243 |
| 920                    | 24 | 31     | -15.58 | 0.63 | 1763.40 | 1399.75     | 516.23  | 4377.17              | 4090.29  | 1443.97  | 24.05 | 1445.57  | 49.24  | 1347.99  | 529.35  | 1355.93  | 537.91  | -4802.268708 |
| 921                    | 24 | 32     | -15.55 | 0.66 | 1763.40 | 1393.53     | 599.99  | 3270.04              | 5601.98  | 1443.93  | 27.73 | 1444.68  | 56.24  | 1343.89  | 615.26  | 1341.60  | 609.36  | -4802.267399 |
| 922                    | 24 | 33     | -15.53 | 0.68 | 1763.40 | 1414.21     | 531.66  | 706.63               | 3959.79  | 1445.72  | 28.06 | 1448.08  | 56.33  | 1354.99  | 528.97  | 1361.24  | 522.93  | -4802.266801 |
| 923                    | 24 | 34     | -15.51 | 0.70 | 1763.40 | 1453.56     | 673.66  | 10624.58             | 26144.45 | 1446.73  | 30.54 | 1448.67  | 59.23  | 1406.58  | 701.83  | 1407.80  | 719.49  | -4802.266094 |
| 924                    | 24 | 35     | -15.50 | 0.71 | 1763.40 | 1401.70     | 506.61  | 2531.65              | 1889.20  | 1443.41  | 23.12 | 1444.61  | 48.27  | 1340.89  | 503.37  | 1346.49  | 504.86  | -4802.265600 |
| 925                    | 24 | 36     | -15.46 | 0.75 | 1763.40 | 1390.15     | 626.97  | 1317.82              | 4112.76  | 1446.19  | 33.99 | 1448.00  | 68.39  | 1360.68  | 644.07  | 1354.79  | 643.30  | -4802.263943 |
| 926                    | 24 | 37     | -15.43 | 0.78 | 1763.40 | 1428.29     | 621.87  | 2747.72              | 2923.87  | 1445.78  | 29.75 | 1447.92  | 64.32  | 1388.24  | 624.65  | 1380.51  | 607.70  | -4802.262957 |
| 927                    | 24 | 38     | -15.40 | 0.81 | 1763.40 | 1403.96     | 522.68  | -358.96              | 7619.91  | 1443.93  | 23.39 | 1445.67  | 48.34  | 1350.86  | 529.07  | 1350.19  | 527.38  | -4802.261883 |
| 928                    | 24 | 39     | -15.36 | 0.85 | 1763.40 | 1502.79     | 879.52  | -1435.89             | 8989.95  | 1449.30  | 37.86 | 1451.95  | 72.46  | 1437.22  | 857.81  | 1449.18  | 865.31  | -4802.260229 |
| 929                    | 24 | 40     | -15.35 | 0.86 | 1763.40 | 1502.99     | 686.51  | 9299.55              | 19249.80 | 1447.50  | 27.42 | 1450.02  | 52.48  | 1441.02  | 690.24  | 1436.96  | 672.18  | -4802.259879 |
| 930                    | 24 | 41     | -15.32 | 0.89 | 1763.40 | 1421.79     | 333.05  | 2092.01              | 1932.64  | 1444.29  | 13.63 | 1447.36  | 28.46  | 1370.52  | 330.30  | 1365.45  | 339.66  | -4802.258771 |
| 931                    | 24 | 42     | -15.19 | 1.02 | 1763.40 | 1466.61     | 414.45  | 4645.59              | 7246.41  | 1445.84  | 17.38 | 1449.19  | 36.44  | 1407.91  | 416.44  | 1409.89  | 425.42  | -4802.253673 |
| 932                    | 24 | 43     | -15.14 | 1.07 | 1763.40 | 1431.70     | 703.63  | 3187.62              | 4238.08  | 1447.83  | 36.90 | 1450.29  | 75.92  | 1388.27  | 715.09  | 1309.28  | 699.19  | -4802.251951 |
| 933                    | 24 | 44     | -15.07 | 1.14 | 1763.40 | 1475.98     | 719.41  | 7037.01              | 14986.16 | 1449.24  | 34.11 | 1452.87  | 65.85  | 1425.71  | 705.35  | 1430.01  | 725.89  | -4802.249024 |
| 934                    | 24 | 45     | -15.06 | 1.15 | 1763.40 | 1465.73     | 514.18  | -26124.21            | 89386.40 | 1445.77  | 24.83 | 1448.61  | 50.64  | 1393.45  | 519.33  | 1408.45  | 519.21  | -4802.248624 |
| 935                    | 24 | 46     | -15.02 | 1.19 | 1763.40 | 1464.67     | 699.45  | 1555.87              | 1652.56  | 1448.49  | 33.63 | 1451.81  | 68.62  | 1429.79  | 721.77  | 1411.01  | 690.98  | -4802.247209 |
| 936                    | 24 | 47     | -15.01 | 1.20 | 1763.40 | 1475.55     | 700.52  | 8364.81              | 14173.28 | 1447.37  | 30.75 | 1450.41  | 67.75  | 1425.83  | 710.98  | 1431.92  | 719.13  | -4802.246620 |
| 937                    | 24 | 48     | -14.92 | 1.29 | 1763.40 | 1495.26     | 719.47  | -2564.97             | 17480.95 | 1449.84  | 33.08 | 1454.07  | 71.65  | 1424.46  | 704.43  | 1436.30  | 703.87  | -4802.243557 |
| 938                    | 24 | 49     | -14.57 | 1.64 | 1763.40 | 1562.73     | 1034.37 | 3520.31              | 4710.93  | 1453.96  | 47.42 | 1458.20  | 89.67  | 1497.16  | 1016.27 | 1517.93  | 1034.28 | -4802.229896 |
| 939                    | 24 | 50     | -14.33 | 1.88 | 1763.40 | 1645.32     | 1295.82 | -361315.831087911.74 | 1465.90  | 1465.90  | 67.00 | 1471.72  | 114.58 | 1572.46  | 1320.25 | 1582.39  | 1314.72 | -4802.220612 |
| 940                    | 24 | 51     | -14.31 | 1.90 | 1763.40 | 1616.30     | 1093.80 | 2197.94              | 5666.45  | 1457.24  | 50.81 | 1462.88  | 93.75  | 1552.94  | 1080.33 | 1559.49  | 1085.38 | -4802.220033 |
| 941                    | 24 | 52     | -14.14 | 2.07 | 1763.40 | 1654.83     | 1094.34 | 5985.95              | 21983.12 | 1458.31  | 47.80 | 1464.72  | 86.56  | 1599.60  | 1101.80 | 1604.20  | 1091.05 | -4802.213658 |
| 942                    | 24 | 53     | -13.99 | 2.22 | 1763.40 | 1660.08     | 1150.51 | 238.47               | 6030.26  | 1464.10  | 57.88 | 1471.55  | 98.51  | 1588.34  | 1148.66 | 1602.63  | 1159.70 | -4802.207816 |
| 943                    | 24 | 54     | -13.79 | 2.42 | 1763.40 | 1697.26     | 1353.56 | 1647.22              | 3638.29  | 1467.94  | 63.25 | 1474.54  | 103.49 | 1627.06  | 1341.64 | 1633.94  | 1324.00 | -4802.200064 |
| 944                    | 25 | 1*     | -16.48 | 0.00 | 1836.87 | 1368.82     | 445.12  | 4112.94              | 5076.97  | 1491.21  | 25.93 | 1492.13  | 53.39  | 1349.43  | 508.15  | 1334.82  | 483.00  | -5002.399141 |
| 945                    | 25 | 2      | -16.48 | 0.00 | 1836.87 | 1377.40     | 503.79  | 4126.95              | 6930.70  | 1491.75  | 29.01 | 1492.46  | 59.04  | 1358.78  | 549.35  | 1339.57  | 533.20  | -5002.398854 |
| 946                    | 25 | 3      | -16.47 | 0.01 | 1836.87 | 1362.06     | 511.25  | 1368.29              | 3672.68  | 1491.22  | 29.07 | 1491.57  | 59.41  | 1342.98  | 542.97  | 1321.17  | 546.25  | -5002.398561 |
| 947                    | 25 | 4      | -16.47 | 0.01 | 1836.87 | 1368.38     | 488.69  | 2459.12              | 2336.31  | 1491.66  | 27.54 | 1492.68  | 56.21  | 1346.28  | 524.49  | 1329.07  | 515.33  | -5002.398513 |
| 948                    | 25 | 5      | -16.42 | 0.06 | 1836.87 | 1375.22     | 535.79  | 2985.89              | 3806.32  | 1491.75  | 30.05 | 1492.36  | 61.20  | 1346.93  | 563.16  | 1335.26  | 576.02  | -5002.396708 |
| 949                    | 25 | 6      | -16.42 | 0.06 | 1836.87 | 1369.68     | 445.45  | 2694.16              | 2610.99  | 1491.46  | 24.77 | 1492.88  | 50.99  | 1335.32  | 491.47  | 1326.57  | 468.61  | -5002.396669 |
| 950                    | 25 | 7      | -16.41 | 0.07 | 1836.87 | 1370.31     | 504.41  | 2484.33              | 2880.78  | 1491.83  | 29.89 | 1492.62  | 61.00  | 1347.48  | 566.95  | 1331.79  | 533.62  | -5002.396168 |
| 951                    | 25 | 8      | -16.30 | 0.18 | 1836.87 | 1392.97     | 530.47  | 2986.61              | 5320.78  | 1492.55  | 30.26 | 1493.73  | 61.41  | 1359.44  | 563.25  | 1356.64  | 557.60  | -5002.392007 |
| 952                    | 25 | 9      | -16.30 | 0.18 | 1836.87 | 1384.01     | 446.57  | 2438.64              | 1909.32  | 1492.27  | 25.56 | 1494.20  | 52.32  | 1355.43  | 507.68  | 1345.75  | 474.30  | -5002.391823 |
| 953                    | 25 | 10     | -16.26 | 0.22 | 1836.87 | 1416.44     | 519.10  | 2725.01              | 1866.89  | 1494.07  | 29.96 | 1496.46  | 59.89  | 1396.31  | 569.02  | 1385.41  | 568.27  | -5002.390372 |
| 954                    | 25 | 11     | -16.09 | 0.39 | 1836.87 | 1423.28     | 585.34  | 2859.30              | 4047.03  | 1494.32  | 31.95 | 1496.60  | 63.52  | 1390.30  | 620.96  | 1382.67  | 621.32  | -5002.383646 |
| 955                    | 25 | 12     | -15.84 | 0.64 | 1836.87 | 1458.52     | 523.71  | -6835.65             | 27389.30 | 1494.34  | 25.50 | 1497.97  | 53.06  | 1407.06  | 538.84  | 1410.55  | 557.58  | -5002.373640 |
| 956                    | 25 | 13     | -15.81 | 0.67 | 1836.87 | 1472.48     | 753.40  | -3249.18             | 14889.72 | 1497.07  | 35.06 | 1500.71  | 67.13  | 1340.55  | 773.64  | 1420.42  | 782.19  | -5002.372332 |
| 957                    | 25 | 14     | -15.81 | 0.67 | 1836.87 | 1428.36     | 463.35  | 3333.78              | 3285.70  | 1495.09  | 26.15 | 1499.20  | 53.74  | 1464.26  | 455.76  | 1375.36  | 473.18  | -5002.372271 |
| 958                    | 25 | 15     | -15.75 | 0.73 | 1836.87 | 1495.01     | 664.22  | -4027.65             | 17960.33 | 1499.32  | 35.58 | 1503.99  | 66.00  | 1443.90  | 682.15  | 1438.80  | 694.23  | -5002.369873 |
| 959                    | 25 | 16     | -15.71 | 0.77 | 1836.87 | 1457.04     | 625.39  | 3184.92              | 3857.13  | 1496.61  | 33.92 | 1500.59  | 69.33  | 1409.31  | 634.88  | 1408.17  | 621.80  | -5002.368247 |
| 960                    | 25 | 17     | -15.70 | 0.78 | 1836.87 | 1462.20     | 795.36  | 10002.81             | 24125.34 | 1496.25  | 38.51 | 1498.51  | 75.09  | 1423.11  | 838.96  | 1422.86  | 829.93  | -5002.367965 |

| Polarizability models: |    |        |        | n*alp | DFT results |         | AM model |              | TL model  |         | TE model |         | RP model |         | GD model |         | Etot    |              |
|------------------------|----|--------|--------|-------|-------------|---------|----------|--------------|-----------|---------|----------|---------|----------|---------|----------|---------|---------|--------------|
| i                      | n  | isomer | Eb     | Erel  | Aiso        | Aaniso  | Aiso     | Aaniso       | Aiso      | Aaniso  | Aiso     | Aaniso  | Aiso     | Aaniso  | Aiso     | Aaniso  |         |              |
| 961                    | 25 | 18     | -15.66 | 0.82  | 1836.87     | 1500.62 | 537.29   | 2625.55      | 2355.41   | 1495.72 | 25.22    | 1499.91 | 52.12    | 1443.81 | 540.66   | 1441.65 | 544.24  | -5002.366426 |
| 962                    | 25 | 19     | -15.59 | 0.89  | 1836.87     | 1517.85 | 579.78   | 5360.68      | 5830.82   | 1498.40 | 28.01    | 1503.97 | 56.47    | 1464.18 | 583.76   | 1464.71 | 584.26  | -5002.363472 |
| 963                    | 25 | 20     | -15.58 | 0.90  | 1836.87     | 1456.38 | 488.06   | -550823.9416 | 58502.54  | 1494.71 | 25.55    | 1498.85 | 51.88    | 1402.12 | 514.92   | 1395.62 | 500.20  | -5002.363319 |
| 964                    | 25 | 21     | -15.56 | 0.92  | 1836.87     | 1512.88 | 532.42   | -53142.23    | 168666.09 | 1496.49 | 25.70    | 1501.19 | 52.52    | 1469.69 | 548.00   | 1461.40 | 533.40  | -5002.362508 |
| 965                    | 25 | 22     | -15.55 | 0.93  | 1836.87     | 1474.11 | 650.20   | 2118.64      | 1896.26   | 1497.28 | 34.56    | 1501.35 | 69.50    | 1445.01 | 669.90   | 1443.89 | 652.79  | -5002.361793 |
| 966                    | 25 | 23     | -15.44 | 1.04  | 1836.87     | 1544.65 | 861.38   | -7257.44     | 27539.12  | 1500.07 | 40.01    | 1504.95 | 75.53    | 1465.47 | 849.34   | 1481.82 | 880.37  | -5002.357405 |
| 967                    | 25 | 24     | -15.43 | 1.05  | 1836.87     | 1497.46 | 768.32   | 7908.07      | 17796.95  | 1498.66 | 39.40    | 1502.57 | 75.18    | 1454.72 | 796.49   | 1456.94 | 801.41  | -5002.357306 |
| 968                    | 25 | 25     | -15.40 | 1.08  | 1836.87     | 1531.20 | 853.80   | 1323.73      | 9207.07   | 1499.46 | 38.51    | 1504.59 | 73.84    | 1480.22 | 865.01   | 1472.68 | 854.66  | -5002.356121 |
| 969                    | 25 | 26     | -15.36 | 1.12  | 1836.87     | 1499.10 | 467.82   | 25553.88     | 65712.97  | 1498.52 | 26.11    | 1504.63 | 54.54    | 1472.18 | 515.65   | 1455.05 | 474.25  | -5002.354365 |
| 970                    | 25 | 27     | -15.33 | 1.15  | 1836.87     | 1494.18 | 672.51   | 4341.72      | 5786.74   | 1498.35 | 34.24    | 1503.25 | 69.31    | 1452.43 | 684.01   | 1442.57 | 659.38  | -5002.353068 |
| 971                    | 25 | 28     | -15.31 | 1.17  | 1836.87     | 1526.64 | 525.50   | 3499.10      | 3670.67   | 1497.97 | 25.96    | 1503.67 | 52.53    | 1475.45 | 543.77   | 1471.10 | 534.72  | -5002.352515 |
| 972                    | 25 | 29     | -15.29 | 1.19  | 1836.87     | 1583.54 | 1005.13  | 1739.11      | 4948.14   | 1503.25 | 45.58    | 1508.56 | 82.16    | 1522.95 | 997.83   | 1526.47 | 1008.55 | -5002.351545 |
| 973                    | 25 | 30     | -13.48 | 3.00  | 1836.87     | 1978.89 | 1760.38  | -31202.30    | 90501.33  | 1531.82 | 84.53    | 1542.13 | 135.43   | 1913.50 | 1782.25  | 1910.67 | 1770.67 | -5002.279388 |
| 974                    | 26 | 1*     | -16.52 | 0.00  | 1910.35     | 1450.71 | 472.51   | 3225.04      | 3309.70   | 1542.92 | 28.72    | 1547.22 | 56.96    | 1423.13 | 532.88   | 1408.31 | 505.80  | -5202.496575 |
| 975                    | 26 | 2      | -16.52 | 0.00  | 1910.35     | 1421.98 | 441.61   | 2575.31      | 2098.07   | 1542.06 | 26.16    | 1546.36 | 53.39    | 1384.75 | 498.98   | 1373.26 | 470.71  | -5202.496422 |
| 976                    | 26 | 3      | -16.49 | 0.03  | 1910.35     | 1426.92 | 466.37   | 2299.82      | 2998.18   | 1542.32 | 28.79    | 1546.37 | 57.80    | 1394.92 | 514.93   | 1377.77 | 499.06  | -5202.495232 |
| 977                    | 26 | 4      | -16.48 | 0.04  | 1910.35     | 1444.82 | 479.43   | 2038.83      | 3055.23   | 1542.27 | 28.17    | 1546.23 | 57.06    | 1419.05 | 531.33   | 1403.25 | 512.48  | -5202.495114 |
| 978                    | 26 | 5      | -16.48 | 0.04  | 1910.35     | 1419.20 | 439.45   | 2386.06      | 1917.19   | 1541.76 | 26.17    | 1545.70 | 53.75    | 1395.06 | 501.60   | 1378.48 | 470.73  | -5202.494940 |
| 979                    | 26 | 6      | -16.47 | 0.05  | 1910.35     | 1423.41 | 447.19   | 2560.58      | 1734.54   | 1541.23 | 26.79    | 1544.41 | 54.44    | 1384.94 | 497.85   | 1376.24 | 458.63  | -5202.494594 |
| 980                    | 26 | 7      | -16.46 | 0.06  | 1910.35     | 1416.16 | 450.40   | 2465.61      | 2542.70   | 1541.82 | 26.72    | 1545.86 | 54.21    | 1373.20 | 496.03   | 1360.12 | 477.31  | -5202.494297 |
| 981                    | 26 | 8      | -16.45 | 0.07  | 1910.35     | 1421.28 | 421.53   | 15673.52     | 40776.27  | 1541.40 | 24.77    | 1545.31 | 50.41    | 1393.44 | 476.23   | 1380.32 | 455.22  | -5202.493628 |
| 982                    | 26 | 9      | -16.44 | 0.08  | 1910.35     | 1462.56 | 596.34   | 3309.26      | 5000.42   | 1543.68 | 33.75    | 1547.57 | 66.47    | 1417.05 | 604.03   | 1414.58 | 625.87  | -5202.493421 |
| 983                    | 26 | 10     | -16.42 | 0.10  | 1910.35     | 1433.86 | 448.56   | 1993.53      | 1503.93   | 1541.79 | 26.75    | 1545.64 | 54.95    | 1401.36 | 505.03   | 1387.75 | 481.72  | -5202.492291 |
| 984                    | 26 | 11     | -16.41 | 0.11  | 1910.35     | 1417.12 | 426.72   | 996.38       | 2913.97   | 1541.34 | 25.08    | 1545.18 | 50.90    | 1388.52 | 473.70   | 1374.20 | 455.16  | -5202.492036 |
| 985                    | 26 | 12     | -16.38 | 0.14  | 1910.35     | 1431.87 | 452.19   | 2067.17      | 2109.87   | 1541.74 | 25.96    | 1545.71 | 53.13    | 1395.12 | 498.90   | 1387.63 | 491.52  | -5202.490941 |
| 986                    | 26 | 13     | -16.37 | 0.15  | 1910.35     | 1445.04 | 460.13   | 6847.63      | 14695.27  | 1542.57 | 27.98    | 1546.75 | 55.84    | 1411.77 | 500.88   | 1399.24 | 486.72  | -5202.490324 |
| 987                    | 26 | 14     | -16.35 | 0.17  | 1910.35     | 1418.28 | 414.65   | 2484.66      | 1524.86   | 1541.07 | 24.74    | 1544.70 | 50.75    | 1385.75 | 461.23   | 1378.62 | 451.19  | -5202.489687 |
| 988                    | 26 | 15     | -16.35 | 0.17  | 1910.35     | 1420.89 | 386.96   | 18810.67     | 48908.04  | 1540.89 | 23.20    | 1544.34 | 47.55    | 1408.25 | 460.99   | 1389.49 | 416.67  | -5202.489446 |
| 989                    | 26 | 16     | -16.32 | 0.20  | 1910.35     | 1458.79 | 607.98   | 3271.06      | 4901.18   | 1543.57 | 34.15    | 1547.36 | 67.40    | 1409.80 | 600.85   | 1405.39 | 619.46  | -5202.488516 |
| 990                    | 26 | 17     | -16.32 | 0.20  | 1910.35     | 1435.79 | 432.38   | 3001.86      | 2433.14   | 1541.68 | 25.44    | 1545.55 | 51.93    | 1404.94 | 488.20   | 1395.69 | 462.44  | -5202.488305 |
| 991                    | 26 | 18     | -16.31 | 0.21  | 1910.35     | 1431.92 | 454.29   | 2665.33      | 2195.11   | 1542.29 | 27.10    | 1546.55 | 55.16    | 1405.93 | 507.26   | 1389.35 | 489.39  | -5202.487735 |
| 992                    | 26 | 19     | -16.30 | 0.22  | 1910.35     | 1441.70 | 416.45   | 2957.71      | 2658.15   | 1542.00 | 23.77    | 1546.40 | 48.75    | 1402.54 | 478.57   | 1396.31 | 443.21  | -5202.487656 |
| 993                    | 26 | 20     | -16.29 | 0.23  | 1910.35     | 1464.95 | 463.63   | 4075.00      | 7903.32   | 1542.49 | 28.57    | 1546.37 | 56.86    | 1432.85 | 514.37   | 1429.57 | 489.70  | -5202.487270 |
| 994                    | 26 | 21     | -16.28 | 0.24  | 1910.35     | 1421.45 | 398.41   | 2052.73      | 1229.02   | 1541.35 | 23.46    | 1545.43 | 47.86    | 1406.49 | 459.10   | 1388.95 | 422.47  | -5202.486776 |
| 995                    | 26 | 22     | -16.28 | 0.24  | 1910.35     | 1450.13 | 438.82   | 2534.27      | 2333.57   | 1542.04 | 26.09    | 1546.18 | 53.29    | 1418.67 | 491.72   | 1408.82 | 467.28  | -5202.486704 |
| 996                    | 26 | 23     | -16.28 | 0.24  | 1910.35     | 1451.92 | 544.25   | 2564.91      | 1549.53   | 1545.97 | 33.52    | 1552.33 | 67.33    | 1422.23 | 583.60   | 1404.64 | 539.35  | -5202.486638 |
| 997                    | 26 | 24     | -16.25 | 0.27  | 1910.35     | 1438.23 | 373.00   | 2535.77      | 1198.44   | 1542.34 | 22.83    | 1547.28 | 45.96    | 1410.02 | 444.44   | 1398.40 | 408.50  | -5202.485284 |
| 998                    | 26 | 25     | -16.25 | 0.27  | 1910.35     | 1450.10 | 433.63   | 2505.46      | 1646.91   | 1542.45 | 26.07    | 1546.92 | 53.10    | 1416.26 | 478.84   | 1409.01 | 469.99  | -5202.485247 |
| 999                    | 26 | 26     | -16.22 | 0.30  | 1910.35     | 1413.89 | 410.97   | 2469.77      | 1943.96   | 1541.46 | 24.63    | 1545.64 | 49.96    | 1365.18 | 469.40   | 1356.21 | 447.16  | -5202.484290 |
| 1000                   | 26 | 27     | -16.21 | 0.31  | 1910.35     | 1405.59 | 427.77   | 2223.60      | 1630.68   | 1540.95 | 24.84    | 1544.34 | 51.19    | 1372.48 | 468.09   | 1366.03 | 455.17  | -5202.483726 |
| 1001                   | 26 | 28     | -16.20 | 0.32  | 1910.35     | 1455.56 | 477.73   | 2682.00      | 3224.67   | 1541.01 | 27.89    | 1543.60 | 57.57    | 1415.37 | 509.33   | 1443.43 | 509.55  | -5202.483432 |
| 1002                   | 26 | 29     | -16.19 | 0.33  | 1910.35     | 1425.37 | 386.37   | 2164.38      | 1070.40   | 1541.65 | 23.48    | 1546.04 | 47.69    | 1404.78 | 457.18   | 1384.24 | 421.29  | -5202.482986 |
| 1003                   | 26 | 30     | -16.18 | 0.34  | 1910.35     | 1482.98 | 456.57   | 4234.48      | 5717.67   | 1544.25 | 26.08    | 1550.33 | 52.67    | 1430.66 | 487.20   | 1427.63 | 471.61  | -5202.482442 |
| 1004                   | 26 | 31     | -16.08 | 0.44  | 1910.35     | 1481.55 | 511.62   | 2875.80      | 3373.05   | 1544.00 | 27.54    | 1549.35 | 54.85    | 1442.22 | 546.62   | 1438.07 | 545.34  | -5202.48205  |
| 1005                   | 26 | 32     | -16.04 | 0.48  | 1910.35     | 1405.93 | 349.02   | 2227.33      | 1210.55   | 1541.37 | 21.10    | 1545.97 | 42.82    | 1358.45 | 411.48   | 1354.82 | 396.96  | -5202.476831 |
| 1006                   | 26 | 33     | -15.93 | 0.59  | 1910.35     | 1530.00 | 574.00   | 4487.03      | 6799.20   | 1547.24 | 31.80    | 1554.26 | 62.01    | 1482.79 | 590.00   | 1480.73 | 601.13  | -5202.472172 |
| 1007                   | 26 | 34     | -15.85 | 0.67  | 1910.35     | 1492.45 | 630.99   | 1438.91      | 3789.68   | 1543.84 | 34.73    | 1547.82 | 68.41    | 1420.92 | 582.34   | 1451.36 | 654.64  | -5202.468864 |
| 1008                   | 26 | 35     | -15.83 | 0.69  | 1910.35     | 1576.35 | 591.63   | 24922.95     | 73092.94  | 1548.85 | 32.83    | 1556.39 | 63.88    | 1521.91 | 603.56   | 1517.51 | 596.44  | -5202.468090 |
| 1009                   | 26 | 36     | -15.78 | 0.74  | 1910.35     | 1537.24 | 527.58   | 6440.49      | 16037.07  | 1546.01 | 26.51    | 1553.16 | 53.52    | 1480.93 | 545.62   | 1488.55 | 546.76  | -5202.465771 |
| 1010                   | 26 | 37     | -14.29 | 2.23  | 1910.35     | 1893.08 | 1865.49  | -770.64      | 5804.86   | 1580.22 | 95.14    | 1588.50 | 144.73   | 1841.52 | 1895.41  | 1858.74 | 1933.35 | -5202.404278 |
| 1011                   | 27 | 1*     | -16.79 | 0.00  | 1983.82     | 1459.27 | 427.81   | 2537.96      | 2011.65   | 1591.90 | 27.45    | 1598.99 | 54.24    | 1436.00 | 487.63   | 1411.90 | 464.57  | -5402.604423 |

| Polarizability models: |    |        |        |      | n*alp   | DFT results |         | AM model  |           | TL model |       | TE model |        | RP model |         | GD model |         | Etot         |
|------------------------|----|--------|--------|------|---------|-------------|---------|-----------|-----------|----------|-------|----------|--------|----------|---------|----------|---------|--------------|
| i                      | n  | isomer | Eb     | Erel | Aiso    | Aaiso       | Aaiso   | Aaiso     | Aaiso     | Aaiso    | Aaiso | Aaiso    | Aaiso  | Aaiso    | Aaiso   | Aaiso    | Aaiso   |              |
| 1012                   | 27 | 2      | -16.79 | 0.00 | 1983.82 | 1483.48     | 434.80  | 23501.32  | 63888.43  | 1592.44  | 26.97 | 1599.98  | 53.63  | 1451.42  | 478.64  | 1437.27  | 469.71  | -5402.604262 |
| 1013                   | 27 | 3      | -16.78 | 0.01 | 1983.82 | 1484.01     | 468.44  | 3585.33   | 5170.30   | 1592.15  | 29.76 | 1598.90  | 59.75  | 1450.01  | 517.39  | 1440.70  | 500.75  | -5402.603956 |
| 1014                   | 27 | 4      | -16.75 | 0.04 | 1983.82 | 1477.92     | 472.75  | 2765.80   | 2147.99   | 1592.16  | 28.09 | 1599.27  | 57.01  | 1444.18  | 517.48  | 1435.27  | 502.42  | -5402.602532 |
| 1015                   | 27 | 5      | -16.75 | 0.04 | 1983.82 | 1504.78     | 487.58  | 3065.83   | 3416.50   | 1593.11  | 29.80 | 1600.57  | 58.85  | 1466.06  | 532.78  | 1459.98  | 521.99  | -5402.602454 |
| 1016                   | 27 | 6      | -16.74 | 0.05 | 1983.82 | 1457.35     | 382.49  | 2398.46   | 1790.67   | 1591.34  | 24.16 | 1598.50  | 48.57  | 1414.91  | 435.12  | 1407.48  | 419.43  | -5402.602216 |
| 1017                   | 27 | 7      | -16.71 | 0.08 | 1983.82 | 1487.83     | 470.72  | 3338.68   | 3785.15   | 1592.70  | 29.75 | 1599.97  | 59.29  | 1447.98  | 517.58  | 1437.74  | 505.83  | -5402.600918 |
| 1018                   | 27 | 8      | -16.70 | 0.09 | 1983.82 | 1472.50     | 426.12  | 3571.73   | 4855.55   | 1590.23  | 25.96 | 1595.83  | 53.04  | 1451.41  | 468.57  | 1449.05  | 455.14  | -5402.600376 |
| 1019                   | 27 | 9      | -16.69 | 0.10 | 1983.82 | 1501.35     | 472.92  | 9542.22   | 21339.53  | 1593.03  | 29.52 | 1600.46  | 58.40  | 1461.11  | 528.82  | 1454.79  | 509.11  | -5402.600161 |
| 1020                   | 27 | 10     | -16.66 | 0.13 | 1983.82 | 1464.58     | 463.50  | -2983.74  | 11053.84  | 1592.62  | 29.53 | 1599.98  | 58.40  | 1430.20  | 498.44  | 1410.70  | 497.90  | -5402.598701 |
| 1021                   | 27 | 11     | -16.64 | 0.15 | 1983.82 | 1469.55     | 419.35  | 1406.62   | 3428.21   | 1592.05  | 26.92 | 1599.24  | 53.55  | 1440.77  | 472.72  | 1422.12  | 456.08  | -5402.597821 |
| 1022                   | 27 | 12     | -16.62 | 0.17 | 1983.82 | 1503.27     | 482.74  | 2736.22   | 2143.12   | 1592.94  | 28.74 | 1600.26  | 57.61  | 1450.32  | 497.37  | 1460.45  | 519.66  | -5402.597032 |
| 1023                   | 27 | 13     | -16.61 | 0.18 | 1983.82 | 1503.23     | 515.64  | 6700.25   | 10959.03  | 1593.07  | 32.26 | 1600.10  | 64.44  | 1470.70  | 551.15  | 1460.50  | 561.51  | -5402.596295 |
| 1024                   | 27 | 14     | -16.57 | 0.22 | 1983.82 | 1491.47     | 457.79  | 2599.08   | 1833.04   | 1590.76  | 27.27 | 1596.35  | 55.83  | 1467.61  | 512.80  | 1466.39  | 488.19  | -5402.594957 |
| 1025                   | 27 | 15     | -16.57 | 0.22 | 1983.82 | 1510.25     | 563.82  | 7214.54   | 15258.55  | 1593.66  | 33.46 | 1600.80  | 64.97  | 1462.39  | 525.89  | 1463.45  | 592.36  | -5402.594825 |
| 1026                   | 27 | 16     | -16.52 | 0.27 | 1983.82 | 1501.38     | 494.51  | 3335.27   | 4128.79   | 1593.13  | 30.37 | 1600.54  | 58.82  | 1467.66  | 526.95  | 1452.17  | 536.85  | -5402.592741 |
| 1027                   | 27 | 17     | -16.51 | 0.28 | 1983.82 | 1517.15     | 471.98  | 2402.08   | 3886.37   | 1593.34  | 29.36 | 1600.85  | 58.38  | 1464.76  | 483.77  | 1474.13  | 498.44  | -5402.592332 |
| 1028                   | 27 | 18     | -16.44 | 0.35 | 1983.82 | 1572.20     | 600.41  | 4938.91   | 10300.21  | 1594.06  | 30.73 | 1601.65  | 59.13  | 1528.12  | 502.00  | 1521.43  | 600.12  | -5402.589285 |
| 1029                   | 27 | 19     | -16.43 | 0.36 | 1983.82 | 1556.97     | 474.95  | 119145.55 | 347021.57 | 1594.79  | 30.83 | 1602.74  | 59.62  | 1516.17  | 538.52  | 1517.11  | 509.04  | -5402.588973 |
| 1030                   | 27 | 20     | -16.42 | 0.37 | 1983.82 | 1529.16     | 520.50  | 3082.27   | 3150.66   | 1594.62  | 29.57 | 1602.78  | 60.17  | 1503.29  | 551.97  | 1488.57  | 544.81  | -5402.588131 |
| 1031                   | 27 | 21     | -16.15 | 0.64 | 1983.82 | 1521.51     | 640.52  | -7022.69  | 26935.10  | 1594.81  | 39.76 | 1601.50  | 76.66  | 1469.87  | 635.81  | 1484.47  | 662.00  | -5402.576842 |
| 1032                   | 27 | 22     | -16.14 | 0.65 | 1983.82 | 1557.58     | 627.79  | 3083.99   | 3355.30   | 1597.41  | 37.10 | 1606.68  | 76.03  | 1537.65  | 663.24  | 1522.65  | 639.20  | -5402.576343 |
| 1033                   | 27 | 23     | -16.13 | 0.66 | 1983.82 | 1578.34     | 841.44  | -2904.12  | 23183.18  | 1597.04  | 44.99 | 1604.34  | 84.41  | 1523.66  | 808.93  | 1525.18  | 836.55  | -5402.575680 |
| 1034                   | 27 | 24     | -16.07 | 0.72 | 1983.82 | 1558.03     | 501.37  | 3151.69   | 3484.72   | 1596.44  | 29.23 | 1606.06  | 57.16  | 1525.34  | 515.84  | 1510.47  | 487.97  | -5402.573075 |
| 1035                   | 27 | 25     | -16.06 | 0.73 | 1983.82 | 1584.01     | 545.48  | 3320.85   | 4676.15   | 1597.00  | 29.82 | 1607.07  | 59.93  | 1529.72  | 545.07  | 1527.08  | 552.10  | -5402.572731 |
| 1036                   | 27 | 26     | -16.04 | 0.75 | 1983.82 | 1593.06     | 865.26  | 5430.49   | 6067.31   | 1597.91  | 46.24 | 1605.49  | 85.81  | 1547.44  | 908.83  | 1534.57  | 859.51  | -5402.571851 |
| 1037                   | 27 | 27     | -15.94 | 0.85 | 1983.82 | 1568.18     | 490.44  | 4439.21   | 4887.02   | 1596.53  | 31.54 | 1605.46  | 60.76  | 1539.03  | 518.25  | 1528.86  | 496.10  | -5402.567754 |
| 1038                   | 27 | 28     | -15.87 | 0.92 | 1983.82 | 1540.76     | 648.62  | -2726.31  | 18009.35  | 1595.82  | 38.38 | 1603.82  | 75.19  | 1506.60  | 652.91  | 1513.03  | 665.30  | -5402.564542 |
| 1039                   | 27 | 29     | -15.59 | 1.20 | 1983.82 | 1640.08     | 494.24  | 3566.70   | 2460.34   | 1599.63  | 27.11 | 1611.40  | 53.68  | 1579.02  | 498.54  | 1591.63  | 485.16  | -5402.552698 |
| 1040                   | 27 | 30     | -15.57 | 1.22 | 1983.82 | 1674.90     | 664.42  | 5472.62   | 7408.21   | 1600.60  | 31.82 | 1612.05  | 63.11  | 1619.62  | 680.21  | 1615.20  | 682.11  | -5402.551631 |
| 1041                   | 27 | 31     | -15.43 | 1.36 | 1983.82 | 1660.20     | 879.66  | 5895.13   | 11033.18  | 1600.95  | 43.09 | 1611.58  | 79.87  | 1584.56  | 884.57  | 1599.74  | 908.09  | -5402.545637 |
| 1042                   | 27 | 32     | -15.18 | 1.61 | 1983.82 | 1687.98     | 826.05  | 3466.31   | 6344.24   | 1604.07  | 45.74 | 1615.75  | 85.60  | 1638.72  | 831.16  | 1650.09  | 842.56  | -5402.534974 |
| 1043                   | 27 | 33     | -14.97 | 1.82 | 1983.82 | 1724.20     | 988.63  | -9924.43  | 34420.29  | 1609.26  | 53.13 | 1622.55  | 100.05 | 1665.10  | 980.30  | 1665.06  | 975.91  | -5402.525785 |
| 1044                   | 27 | 34     | -14.93 | 1.86 | 1983.82 | 1789.95     | 1265.21 | -5549.91  | 23261.85  | 1619.28  | 77.85 | 1632.25  | 128.44 | 1724.44  | 1274.85 | 1739.74  | 1276.45 | -5402.524175 |
| 1045                   | 27 | 35     | -14.81 | 1.98 | 1983.82 | 1869.48     | 1326.34 | 2203.12   | 8184.61   | 1614.68  | 64.18 | 1626.35  | 109.59 | 1787.04  | 1275.50 | 1791.12  | 1238.69 | -5402.518881 |
| 1046                   | 28 | 1*     | -17.16 | 0.00 | 2057.30 | 1544.98     | 587.18  | 5237.19   | 10083.96  | 1642.26  | 36.79 | 1651.26  | 69.65  | 1489.22  | 516.09  | 1494.44  | 590.11  | -5602.717408 |
| 1047                   | 28 | 2      | -17.08 | 0.08 | 2057.30 | 1524.81     | 455.39  | 2489.48   | 1748.17   | 1641.45  | 31.13 | 1650.99  | 59.58  | 1488.47  | 496.87  | 1473.09  | 482.22  | -5602.713802 |
| 1048                   | 28 | 3      | -17.05 | 0.11 | 2057.30 | 1517.33     | 442.94  | 2828.76   | 2478.63   | 1641.22  | 29.75 | 1650.80  | 57.72  | 1479.47  | 484.45  | 1465.05  | 467.02  | -5602.712447 |
| 1049                   | 28 | 4      | -17.03 | 0.13 | 2057.30 | 1527.32     | 444.69  | 4137.72   | 6823.82   | 1641.25  | 30.10 | 1650.64  | 58.41  | 1502.38  | 501.58  | 1482.92  | 464.36  | -5602.711481 |
| 1050                   | 28 | 5      | -17.03 | 0.13 | 2057.30 | 1532.93     | 450.75  | 1799.76   | 1323.53   | 1641.68  | 31.22 | 1651.36  | 59.80  | 1495.81  | 486.74  | 1480.69  | 472.69  | -5602.711432 |
| 1051                   | 28 | 6      | -16.94 | 0.22 | 2057.30 | 1526.88     | 420.56  | 2618.77   | 1823.98   | 1640.74  | 29.09 | 1649.89  | 56.26  | 1516.13  | 506.81  | 1486.42  | 446.70  | -5602.707398 |
| 1052                   | 28 | 7      | -16.92 | 0.24 | 2057.30 | 1540.01     | 462.01  | 2883.25   | 2787.68   | 1641.96  | 31.21 | 1651.81  | 59.75  | 1506.11  | 495.28  | 1494.97  | 493.24  | -5602.706535 |
| 1053                   | 28 | 8      | -16.86 | 0.30 | 2057.30 | 1538.27     | 534.38  | 4200.27   | 6043.24   | 1642.38  | 32.11 | 1652.62  | 61.76  | 1483.64  | 554.43  | 1481.57  | 560.38  | -5602.703993 |
| 1054                   | 28 | 9      | -16.85 | 0.31 | 2057.30 | 1558.53     | 480.55  | 4074.63   | 5531.41   | 1642.18  | 31.82 | 1652.01  | 61.47  | 1517.76  | 539.52  | 1504.48  | 513.15  | -5602.703374 |
| 1055                   | 28 | 10     | -16.81 | 0.35 | 2057.30 | 1512.74     | 331.77  | 2772.66   | 1199.61   | 1639.39  | 32.82 | 1648.41  | 46.86  | 1505.26  | 440.03  | 1477.45  | 352.02  | -5602.701695 |
| 1056                   | 28 | 11     | -16.77 | 0.39 | 2057.30 | 1535.42     | 456.58  | 2467.71   | 1725.16   | 1641.78  | 31.38 | 1651.32  | 60.77  | 1505.21  | 507.52  | 1483.05  | 475.81  | -5602.700023 |
| 1057                   | 28 | 12     | -16.77 | 0.39 | 2057.30 | 1544.22     | 430.62  | 3430.30   | 3921.34   | 1641.73  | 27.47 | 1652.07  | 53.47  | 1504.82  | 480.86  | 1494.41  | 465.74  | -5602.699789 |
| 1058                   | 28 | 13     | -16.75 | 0.41 | 2057.30 | 1528.35     | 448.65  | 2540.05   | 2016.13   | 1639.89  | 26.78 | 1648.85  | 55.36  | 1511.49  | 497.57  | 1503.41  | 485.88  | -5602.698879 |
| 1059                   | 28 | 14     | -16.70 | 0.46 | 2057.30 | 1547.15     | 437.17  | 4646.34   | 7431.25   | 1641.66  | 29.23 | 1651.56  | 56.50  | 1521.88  | 484.11  | 1504.87  | 453.30  | -5602.696783 |
| 1060                   | 28 | 15     | -16.68 | 0.48 | 2057.30 | 1582.40     | 573.06  | 3991.25   | 5805.71   | 1643.43  | 34.72 | 1653.69  | 66.90  | 1530.19  | 579.60  | 1536.05  | 624.99  | -5602.695908 |
| 1061                   | 28 | 16     | -16.66 | 0.50 | 2057.30 | 1532.77     | 381.90  | 2481.08   | 2055.42   | 1641.65  | 27.35 | 1651.96  | 53.06  | 1521.94  | 463.28  | 1486.08  | 396.54  | -5602.694845 |
| 1062                   | 28 | 17     | -16.61 | 0.55 | 2057.30 | 1541.04     | 476.06  | 4123.69   | 3629.69   | 1640.87  | 28.23 | 1650.40  | 54.72  | 1492.92  | 497.82  | 1492.48  | 511.65  | -5602.692613 |



| Polarizability models: |    |        |        |      | n*alp   | DFT results |         | AM model  |           | TL model |       | TE model |        | RP model |         | GD model |         | Etot         |
|------------------------|----|--------|--------|------|---------|-------------|---------|-----------|-----------|----------|-------|----------|--------|----------|---------|----------|---------|--------------|
| i                      | n  | isomer | Eb     | Erel | Aiso    | Aaiso       | Aaiso   | Aaiso     | Aaiso     | Aaiso    | Aaiso | Aaiso    | Aaiso  | Aaiso    | Aaiso   | Aaiso    | Aaiso   |              |
| 1063                   | 28 | 18     | -16.41 | 0.75 | 2057.30 | 1620.64     | 956.89  | 3912.97   | 6098.92   | 1648.83  | 54.70 | 1659.06  | 100.05 | 1585.92  | 989.55  | 1571.96  | 958.71  | -5602.683786 |
| 1064                   | 28 | 19     | -16.33 | 0.83 | 2057.30 | 1606.68     | 524.50  | 2514.70   | 4536.71   | 1645.21  | 29.70 | 1657.01  | 59.96  | 1575.02  | 567.63  | 1559.16  | 546.19  | -5602.680400 |
| 1065                   | 28 | 20     | -16.32 | 0.84 | 2057.30 | 1606.42     | 469.13  | 113878.83 | 336137.44 | 1644.99  | 31.84 | 1656.34  | 62.71  | 1595.32  | 510.08  | 1560.60  | 475.28  | -5602.679598 |
| 1066                   | 28 | 21     | -16.28 | 0.88 | 2057.30 | 1582.61     | 365.43  | 1861.35   | 1773.81   | 1642.25  | 25.87 | 1652.75  | 50.16  | 1556.34  | 402.26  | 1545.42  | 370.78  | -5602.678163 |
| 1067                   | 28 | 22     | -16.20 | 0.96 | 2057.30 | 1668.66     | 825.86  | 2889.10   | 2259.82   | 1649.14  | 48.05 | 1660.48  | 87.27  | 1621.35  | 854.07  | 1616.65  | 842.62  | -5602.674344 |
| 1068                   | 28 | 23     | -16.12 | 1.04 | 2057.30 | 1683.38     | 1187.00 | 5932.59   | 13405.35  | 1653.88  | 69.01 | 1663.43  | 121.01 | 1617.55  | 1181.94 | 1630.73  | 1224.94 | -5602.670737 |
| 1069                   | 28 | 24     | -16.10 | 1.06 | 2057.30 | 1567.83     | 547.39  | 1952.20   | 1352.15   | 1642.94  | 33.21 | 1653.14  | 69.21  | 1548.41  | 568.20  | 1553.00  | 525.86  | -5602.669727 |
| 1070                   | 28 | 25     | -16.09 | 1.07 | 2057.30 | 1627.53     | 950.00  | 1467.78   | 2353.15   | 1650.28  | 56.17 | 1660.83  | 104.64 | 1597.97  | 966.31  | 1596.95  | 949.71  | -5602.669401 |
| 1071                   | 28 | 26     | -16.09 | 1.07 | 2057.30 | 1626.16     | 744.42  | 2735.78   | 7186.81   | 1647.19  | 44.05 | 1658.11  | 82.85  | 1581.39  | 783.13  | 1580.14  | 782.14  | -5602.669258 |
| 1072                   | 28 | 27     | -16.07 | 1.09 | 2057.30 | 1658.44     | 1002.52 | -26750.17 | 87010.40  | 1649.92  | 55.69 | 1660.70  | 100.69 | 1589.91  | 998.45  | 1598.74  | 1004.64 | -5602.668771 |
| 1073                   | 28 | 28     | -16.04 | 1.12 | 2057.30 | 1733.69     | 1120.87 | 373.36    | 4407.41   | 1652.56  | 51.97 | 1663.57  | 87.17  | 1672.77  | 1071.64 | 1669.91  | 1099.09 | -5602.667217 |
| 1074                   | 28 | 29     | -16.01 | 1.15 | 2057.30 | 1728.80     | 1089.73 | 16338.48  | 41972.25  | 1655.20  | 61.05 | 1666.91  | 104.97 | 1691.96  | 1125.70 | 1691.11  | 1124.40 | -5602.666117 |
| 1075                   | 28 | 30     | -15.99 | 1.17 | 2057.30 | 1580.64     | 451.66  | 2694.92   | 2929.06   | 1643.14  | 27.76 | 1654.30  | 54.57  | 1548.72  | 489.35  | 1540.11  | 448.52  | -5602.664993 |
| 1076                   | 28 | 31     | -15.86 | 1.30 | 2057.30 | 1788.67     | 1166.49 | 1363.32   | 2241.22   | 1653.96  | 50.31 | 1665.22  | 82.22  | 1738.19  | 1147.32 | 1732.44  | 1166.75 | -5602.659152 |
| 1077                   | 28 | 32     | -15.65 | 1.51 | 2057.30 | 1704.16     | 426.69  | 2905.60   | 3759.10   | 1648.09  | 27.89 | 1661.99  | 55.05  | 1645.03  | 440.99  | 1653.46  | 431.57  | -5602.649985 |
| 1078                   | 28 | 33     | -15.61 | 1.55 | 2057.30 | 1745.38     | 745.35  | -6305.25  | 27190.04  | 1654.89  | 47.85 | 1670.12  | 83.54  | 1688.38  | 751.95  | 1680.18  | 735.37  | -5602.647896 |
| 1079                   | 28 | 34     | -15.46 | 1.70 | 2057.30 | 1648.82     | 596.05  | 11098.88  | 26312.51  | 1646.89  | 36.61 | 1659.07  | 69.97  | 1576.40  | 592.27  | 1602.76  | 644.39  | -5602.641241 |
| 1080                   | 28 | 35     | -15.43 | 1.73 | 2057.30 | 1756.74     | 1096.13 | 2636.38   | 2471.32   | 1657.64  | 61.52 | 1670.84  | 105.21 | 1699.57  | 1106.29 | 1701.45  | 1102.89 | -5602.640055 |
| 1081                   | 28 | 36     | -15.40 | 1.76 | 2057.30 | 1758.95     | 1002.12 | 4876.02   | 14402.26  | 1658.35  | 57.21 | 1673.77  | 110.30 | 1709.43  | 1035.24 | 1708.35  | 1001.53 | -5602.638738 |
| 1082                   | 28 | 37     | -15.39 | 1.77 | 2057.30 | 1730.88     | 1022.54 | -3469.59  | 14978.09  | 1654.86  | 57.77 | 1667.81  | 103.00 | 1659.91  | 994.84  | 1670.97  | 1044.96 | -5602.638341 |
| 1083                   | 28 | 38     | -15.15 | 2.01 | 2057.30 | 1822.08     | 1296.30 | -343.51   | 11972.92  | 1664.70  | 71.90 | 1679.77  | 124.17 | 1747.48  | 1292.27 | 1765.03  | 1304.30 | -5602.627346 |
| 1084                   | 28 | 39     | -15.02 | 2.14 | 2057.30 | 1771.33     | 871.22  | 4201.24   | 3479.75   | 1653.87  | 44.46 | 1669.55  | 82.21  | 1708.83  | 886.12  | 1724.01  | 887.16  | -5602.621652 |
| 1085                   | 28 | 40     | -14.70 | 2.46 | 2057.30 | 1946.31     | 1540.29 | 2703.49   | 5217.39   | 1670.40  | 79.74 | 1684.32  | 126.58 | 1880.24  | 1523.78 | 1892.64  | 1552.33 | -5602.607458 |
| 1086                   | 28 | 41     | -14.50 | 2.66 | 2057.30 | 1896.93     | 888.24  | -3289.87  | 39244.02  | 1662.04  | 44.90 | 1680.31  | 81.57  | 1822.78  | 899.74  | 1832.25  | 897.05  | -5602.598455 |
| 1087                   | 28 | 42     | -14.30 | 2.86 | 2057.30 | 1920.09     | 1300.23 | 23092.38  | 61128.55  | 1676.88  | 84.10 | 1694.24  | 125.48 | 1828.77  | 1294.32 | 1864.31  | 1379.10 | -5602.589723 |
| 1088                   | 29 | 1*     | -17.28 | 0.00 | 2130.77 | 1542.13     | 441.77  | 2376.27   | 1296.62   | 1687.10  | 27.25 | 1697.61  | 56.54  | 1555.31  | 512.27  | 1534.90  | 490.49  | -5802.819727 |
| 1089                   | 29 | 2      | -17.21 | 0.07 | 2130.77 | 1544.95     | 433.37  | 2393.64   | 1191.00   | 1687.54  | 26.38 | 1698.82  | 54.70  | 1544.84  | 501.66  | 1525.77  | 475.22  | -5802.816564 |
| 1090                   | 29 | 3      | -17.04 | 0.24 | 2130.77 | 1584.33     | 506.39  | 2987.43   | 2223.49   | 1689.25  | 30.65 | 1700.62  | 62.74  | 1571.78  | 560.17  | 1566.80  | 542.74  | -5802.808935 |
| 1091                   | 29 | 4      | -16.93 | 0.35 | 2130.77 | 1645.98     | 554.67  | 7284.39   | 13022.15  | 1691.62  | 36.48 | 1703.90  | 68.47  | 1583.47  | 485.57  | 1594.68  | 567.64  | -5802.803626 |
| 1092                   | 29 | 5      | -16.92 | 0.36 | 2130.77 | 1651.48     | 483.02  | 4211.84   | 5997.92   | 1691.66  | 30.11 | 1704.95  | 56.86  | 1599.91  | 525.41  | 1596.46  | 507.85  | -5802.803029 |
| 1093                   | 29 | 6      | -16.89 | 0.39 | 2130.77 | 1671.58     | 611.28  | 34583.83  | 95683.73  | 1693.60  | 38.76 | 1706.53  | 71.39  | 1609.59  | 542.05  | 1615.80  | 625.29  | -5802.801602 |
| 1094                   | 29 | 7      | -16.86 | 0.42 | 2130.77 | 1609.80     | 450.36  | 2569.33   | 2181.52   | 1690.32  | 30.35 | 1702.86  | 58.05  | 1562.16  | 500.13  | 1551.55  | 479.16  | -5802.800507 |
| 1095                   | 29 | 8      | -16.79 | 0.49 | 2130.77 | 1613.14     | 433.19  | 3170.84   | 2615.95   | 1691.25  | 29.74 | 1704.52  | 56.82  | 1581.41  | 478.19  | 1558.23  | 444.23  | -5802.797264 |
| 1096                   | 29 | 9      | -16.78 | 0.50 | 2130.77 | 1583.41     | 347.01  | 2666.07   | 1698.82   | 1688.95  | 22.14 | 1701.80  | 43.41  | 1542.59  | 387.59  | 1539.31  | 364.77  | -5802.796897 |
| 1097                   | 29 | 10     | -16.77 | 0.51 | 2130.77 | 1655.77     | 494.94  | 3571.79   | 2751.87   | 1692.82  | 30.44 | 1706.67  | 60.69  | 1624.79  | 517.59  | 1613.04  | 519.53  | -5802.796049 |
| 1098                   | 29 | 11     | -16.75 | 0.53 | 2130.77 | 1614.35     | 496.45  | 3762.44   | 3400.57   | 1691.40  | 32.30 | 1704.45  | 61.29  | 1568.12  | 532.19  | 1555.06  | 518.58  | -5802.795166 |
| 1099                   | 29 | 12     | -16.74 | 0.54 | 2130.77 | 1642.43     | 467.76  | 6949.29   | 11087.07  | 1691.43  | 29.52 | 1704.80  | 56.57  | 1590.85  | 504.54  | 1591.46  | 498.31  | -5802.794868 |
| 1100                   | 29 | 13     | -16.71 | 0.57 | 2130.77 | 1594.93     | 426.19  | -410.41   | 8174.61   | 1689.93  | 28.65 | 1702.52  | 56.04  | 1586.87  | 503.75  | 1562.31  | 456.26  | -5802.793616 |
| 1101                   | 29 | 14     | -16.67 | 0.61 | 2130.77 | 1588.02     | 385.64  | 3011.50   | 1548.80   | 1688.66  | 25.95 | 1700.62  | 51.90  | 1576.45  | 443.60  | 1555.45  | 405.32  | -5802.791606 |
| 1102                   | 29 | 15     | -16.66 | 0.62 | 2130.77 | 1642.39     | 408.54  | 5578.95   | 9693.31   | 1692.66  | 30.98 | 1706.67  | 57.74  | 1605.65  | 485.13  | 1600.57  | 443.06  | -5802.791207 |
| 1103                   | 29 | 16     | -16.64 | 0.64 | 2130.77 | 1619.79     | 442.83  | 2985.59   | 2532.66   | 1690.99  | 28.88 | 1703.92  | 56.84  | 1587.81  | 485.75  | 1581.88  | 458.38  | -5802.790130 |
| 1104                   | 29 | 17     | -16.62 | 0.66 | 2130.77 | 1697.89     | 1081.53 | 5835.70   | 10701.63  | 1701.16  | 67.07 | 1713.75  | 117.78 | 1645.89  | 1091.40 | 1654.06  | 1098.35 | -5802.789324 |
| 1105                   | 29 | 18     | -16.62 | 0.66 | 2130.77 | 1637.00     | 485.91  | 3240.86   | 1955.58   | 1691.76  | 29.59 | 1705.30  | 58.98  | 1605.01  | 523.86  | 1593.37  | 503.08  | -5802.789323 |
| 1106                   | 29 | 19     | -16.39 | 0.89 | 2130.77 | 1670.80     | 803.07  | 6784.97   | 13448.91  | 1696.31  | 47.93 | 1709.96  | 86.40  | 1612.80  | 820.30  | 1615.20  | 818.15  | -5802.778519 |
| 1107                   | 29 | 20     | -16.30 | 0.98 | 2130.77 | 1691.67     | 941.41  | 5343.33   | 8607.68   | 1697.43  | 55.45 | 1710.43  | 100.32 | 1639.86  | 946.49  | 1650.02  | 985.12  | -5802.774381 |
| 1108                   | 29 | 21     | -16.22 | 1.06 | 2130.77 | 1712.67     | 1144.78 | 1177.66   | 7160.60   | 1702.60  | 72.93 | 1714.56  | 126.48 | 1680.94  | 1202.64 | 1702.92  | 1252.32 | -5802.770890 |
| 1109                   | 29 | 22     | -16.20 | 1.08 | 2130.77 | 1718.08     | 1079.31 | 6245.38   | 13636.20  | 1702.47  | 68.68 | 1715.73  | 119.53 | 1674.09  | 1104.54 | 1708.85  | 1193.63 | -5802.769734 |
| 1110                   | 29 | 23     | -16.20 | 1.08 | 2130.77 | 1641.76     | 367.73  | 3057.92   | 1940.97   | 1690.88  | 27.30 | 1704.16  | 51.38  | 1589.50  | 386.01  | 1600.06  | 355.34  | -5802.769678 |
| 1111                   | 29 | 24     | -16.13 | 1.15 | 2130.77 | 1645.58     | 481.78  | -3929.90  | 16741.72  | 1692.50  | 30.69 | 1706.91  | 58.60  | 1598.95  | 474.03  | 1604.02  | 499.10  | -5802.766757 |
| 1112                   | 29 | 25     | -16.11 | 1.17 | 2130.77 | 1710.60     | 888.21  | 4600.24   | 5870.76   | 1698.96  | 52.46 | 1713.64  | 101.14 | 1689.68  | 930.44  | 1670.55  | 904.70  | -5802.765626 |
| 1113                   | 29 | 26     | -16.08 | 1.20 | 2130.77 | 1725.08     | 1135.16 | 10667.82  | 25984.95  | 1702.40  | 68.22 | 1715.65  | 119.70 | 1642.89  | 1090.94 | 1669.46  | 1169.90 | -5802.764349 |

| Polarizability models: |    |        |        |      | n*alp   | DFT results |         | AM model   |           | TL model |        | TE model |        | RP model |         | GD model |         | Etot         |
|------------------------|----|--------|--------|------|---------|-------------|---------|------------|-----------|----------|--------|----------|--------|----------|---------|----------|---------|--------------|
| i                      | n  | isomer | Eb     | Erel | Aiso    | Aaiso       | Aaiso   | Aaiso      | Aaiso     | Aaiso    | Aaiso  | Aaiso    | Aaiso  | Aaiso    | Aaiso   | Aaiso    | Aaiso   |              |
| 1114                   | 29 | 27     | -15.97 | 1.31 | 2130.77 | 1720.68     | 759.66  | 7790.85    | 14464.16  | 1699.03  | 47.81  | 1713.73  | 88.16  | 1665.56  | 762.24  | 1675.96  | 783.88  | -5802.759251 |
| 1115                   | 29 | 28     | -15.96 | 1.32 | 2130.77 | 1736.26     | 979.81  | 3314.26    | 4553.11   | 1699.50  | 57.29  | 1713.26  | 104.44 | 1694.43  | 1048.25 | 1701.30  | 1032.00 | -5802.758669 |
| 1116                   | 29 | 29     | -15.84 | 1.44 | 2130.77 | 1819.28     | 1035.98 | 34485.43   | 97379.59  | 1705.85  | 57.56  | 1722.43  | 103.27 | 1779.76  | 1092.94 | 1773.41  | 1085.16 | -5802.753038 |
| 1117                   | 29 | 30     | -15.73 | 1.55 | 2130.77 | 1830.39     | 1277.78 | 499.19     | 5904.54   | 1710.77  | 76.63  | 1725.61  | 125.90 | 1782.02  | 1321.34 | 1821.92  | 1344.07 | -5802.748146 |
| 1118                   | 29 | 31     | -15.67 | 1.61 | 2130.77 | 1820.36     | 1061.40 | 582.24     | 3841.35   | 1713.87  | 75.84  | 1730.43  | 121.15 | 1783.40  | 1162.78 | 1785.19  | 1143.22 | -5802.745616 |
| 1119                   | 29 | 32     | -15.54 | 1.74 | 2130.77 | 1859.54     | 1139.24 | -3137.46   | 13548.81  | 1713.41  | 76.42  | 1730.15  | 123.86 | 1819.41  | 1204.66 | 1822.89  | 1180.42 | -5802.739179 |
| 1120                   | 29 | 33     | -15.45 | 1.83 | 2130.77 | 1863.67     | 1186.74 | 7720.47    | 18227.79  | 1713.68  | 73.56  | 1730.83  | 130.91 | 1811.58  | 1229.62 | 1830.49  | 1223.69 | -5802.735053 |
| 1121                   | 29 | 34     | -15.34 | 1.94 | 2130.77 | 1790.74     | 776.87  | 2952.83    | 8385.64   | 1699.36  | 43.83  | 1715.82  | 81.34  | 1724.43  | 795.54  | 1746.54  | 836.62  | -5802.730264 |
| 1122                   | 29 | 35     | -14.76 | 2.52 | 2130.77 | 1975.80     | 1502.86 | 5786.90    | 14437.91  | 1725.49  | 95.30  | 1742.69  | 146.64 | 1922.03  | 1551.34 | 1927.45  | 1530.25 | -5802.703339 |
| 1123                   | 30 | 1*     | -17.45 | 0.00 | 2204.25 | 1598.35     | 416.47  | 3022.98    | 1905.51   | 1735.82  | 27.21  | 1749.78  | 54.99  | 1597.53  | 480.40  | 1586.57  | 479.36  | -6002.925318 |
| 1124                   | 30 | 2      | -17.43 | 0.02 | 2204.25 | 1585.53     | 388.43  | -571.17    | 9314.24   | 1735.55  | 24.84  | 1749.90  | 50.11  | 1578.72  | 462.06  | 1560.54  | 430.94  | -6002.924048 |
| 1125                   | 30 | 3      | -17.37 | 0.08 | 2204.25 | 1599.86     | 407.98  | 3149.43    | 2613.66   | 1735.87  | 24.92  | 1750.27  | 49.92  | 1580.80  | 449.82  | 1574.09  | 450.49  | -6002.921530 |
| 1126                   | 30 | 4      | -17.29 | 0.16 | 2204.25 | 1625.18     | 480.58  | 2972.52    | 2012.14   | 1737.71  | 31.06  | 1752.08  | 62.01  | 1621.01  | 527.35  | 1601.40  | 506.09  | -6002.917483 |
| 1127                   | 30 | 5      | -17.24 | 0.21 | 2204.25 | 1617.74     | 398.63  | 2836.84    | 1382.47   | 1736.88  | 27.16  | 1751.54  | 53.81  | 1618.26  | 454.93  | 1599.86  | 426.77  | -6002.915117 |
| 1128                   | 30 | 6      | -17.08 | 0.37 | 2204.25 | 1634.45     | 383.27  | 3001.50    | 1632.81   | 1737.15  | 27.83  | 1751.73  | 54.31  | 1645.03  | 458.66  | 1609.28  | 407.76  | -6002.907495 |
| 1129                   | 30 | 7      | -17.04 | 0.41 | 2204.25 | 1677.35     | 358.13  | 2064.37    | 3214.36   | 1739.77  | 27.68  | 1756.39  | 51.53  | 1625.15  | 441.74  | 1617.64  | 386.91  | -6002.905436 |
| 1130                   | 30 | 8      | -17.04 | 0.41 | 2204.25 | 1635.84     | 396.56  | 3260.34    | 2444.39   | 1736.55  | 25.92  | 1751.27  | 52.49  | 1614.25  | 431.07  | 1610.71  | 416.84  | -6002.905422 |
| 1131                   | 30 | 9      | -17.04 | 0.41 | 2204.25 | 1644.18     | 430.91  | 2650.39    | 1378.61   | 1737.89  | 26.53  | 1753.38  | 52.86  | 1624.79  | 465.53  | 1614.87  | 450.87  | -6002.905371 |
| 1132                   | 30 | 10     | -16.97 | 0.48 | 2204.25 | 1660.98     | 484.35  | 3063.82    | 2567.71   | 1740.24  | 32.79  | 1756.47  | 63.29  | 1635.72  | 510.39  | 1619.10  | 515.72  | -6002.902279 |
| 1133                   | 30 | 11     | -16.90 | 0.55 | 2204.25 | 1680.38     | 462.34  | 3227.02    | 2178.08   | 1740.68  | 30.93  | 1757.63  | 60.46  | 1635.68  | 467.95  | 1626.83  | 484.99  | -6002.898747 |
| 1134                   | 30 | 12     | -16.85 | 0.60 | 2204.25 | 1670.04     | 444.52  | 1164.50    | 1980.49   | 1738.51  | 28.24  | 1754.00  | 56.12  | 1646.75  | 483.54  | 1645.80  | 467.55  | -6002.896354 |
| 1135                   | 30 | 13     | -16.78 | 0.67 | 2204.25 | 1677.02     | 911.45  | 5040.80    | 7166.72   | 1744.07  | 60.57  | 1758.14  | 108.14 | 1650.53  | 914.17  | 1667.18  | 1006.60 | -6002.892973 |
| 1136                   | 30 | 14     | -16.75 | 0.70 | 2204.25 | 1709.37     | 426.11  | 5446.07    | 7757.22   | 1741.49  | 30.39  | 1758.87  | 58.18  | 1669.34  | 465.92  | 1660.72  | 457.64  | -6002.891706 |
| 1137                   | 30 | 15     | -16.71 | 0.74 | 2204.25 | 1671.80     | 874.30  | 2904.50    | 4343.64   | 1742.55  | 57.65  | 1756.27  | 104.58 | 1639.47  | 881.16  | 1658.59  | 970.22  | -6002.889867 |
| 1138                   | 30 | 16     | -16.67 | 0.78 | 2204.25 | 1650.21     | 359.77  | 3062.34    | 2162.12   | 1737.19  | 23.04  | 1752.90  | 45.47  | 1614.26  | 381.93  | 1615.48  | 344.08  | -6002.887779 |
| 1139                   | 30 | 17     | -16.63 | 0.82 | 2204.25 | 1726.15     | 1098.77 | 3463.71    | 5476.04   | 1749.42  | 73.64  | 1763.74  | 127.69 | 1718.25  | 1213.64 | 1717.07  | 1201.99 | -6002.886171 |
| 1140                   | 30 | 18     | -16.63 | 0.82 | 2204.25 | 1743.87     | 990.66  | 7684.27    | 11145.50  | 1749.05  | 61.53  | 1766.29  | 109.51 | 1709.48  | 1051.82 | 1695.39  | 1032.28 | -6002.885756 |
| 1141                   | 30 | 19     | -16.62 | 0.83 | 2204.25 | 1746.05     | 739.95  | 4393.41    | 5603.83   | 1743.64  | 43.66  | 1760.70  | 79.16  | 1692.95  | 752.69  | 1691.96  | 749.44  | -6002.885403 |
| 1142                   | 30 | 20     | -16.61 | 0.84 | 2204.25 | 1741.81     | 718.26  | 3659.72    | 5704.04   | 1744.40  | 46.03  | 1761.17  | 81.82  | 1705.41  | 767.18  | 1693.12  | 775.82  | -6002.884954 |
| 1143                   | 30 | 21     | -16.59 | 0.86 | 2204.25 | 1691.23     | 456.42  | 3471.46    | 2935.18   | 1740.54  | 30.48  | 1757.23  | 58.71  | 1642.08  | 481.06  | 1637.82  | 476.22  | -6002.884068 |
| 1144                   | 30 | 22     | -16.55 | 0.90 | 2204.25 | 1729.39     | 875.62  | 6320.99    | 11837.08  | 1746.02  | 54.18  | 1762.94  | 96.24  | 1667.56  | 853.48  | 1667.54  | 882.65  | -6002.882314 |
| 1145                   | 30 | 23     | -16.53 | 0.92 | 2204.25 | 1741.70     | 766.82  | 3547.27    | 4181.33   | 1745.90  | 52.70  | 1762.24  | 92.74  | 1708.07  | 821.31  | 1727.70  | 875.19  | -6002.881354 |
| 1146                   | 30 | 24     | -16.52 | 0.93 | 2204.25 | 1752.93     | 1113.10 | 3947.93    | 5820.11   | 1750.16  | 70.53  | 1765.88  | 122.50 | 1718.76  | 1160.31 | 1713.33  | 1158.18 | -6002.880621 |
| 1147                   | 30 | 25     | -16.51 | 0.94 | 2204.25 | 1747.35     | 1114.28 | 4222.46    | 7369.83   | 1751.92  | 75.94  | 1766.98  | 131.00 | 1751.52  | 1239.89 | 1728.34  | 1163.92 | -6002.880273 |
| 1148                   | 30 | 26     | -16.47 | 0.98 | 2204.25 | 1750.60     | 1064.01 | 17035.89   | 27043.34  | 1750.43  | 73.18  | 1765.08  | 125.58 | 1743.67  | 1191.47 | 1778.68  | 1144.67 | -6002.878540 |
| 1149                   | 30 | 27     | -16.43 | 1.02 | 2204.25 | 1717.29     | 844.61  | 3032.29    | 2796.23   | 1746.85  | 53.06  | 1764.55  | 104.79 | 1697.01  | 854.15  | 1682.82  | 821.73  | -6002.876543 |
| 1150                   | 30 | 28     | -16.33 | 1.12 | 2204.25 | 1798.72     | 951.68  | 4746.59    | 7358.85   | 1751.31  | 62.12  | 1768.71  | 105.24 | 1780.91  | 1048.34 | 1775.06  | 1041.65 | -6002.871432 |
| 1151                   | 30 | 29     | -16.33 | 1.12 | 2204.25 | 1834.64     | 1405.74 | 3208.97    | 4822.86   | 1756.93  | 85.23  | 1772.98  | 142.13 | 1797.49  | 1447.92 | 1792.54  | 1416.47 | -6002.871389 |
| 1152                   | 30 | 30     | -16.30 | 1.15 | 2204.25 | 1850.22     | 1491.84 | 55678.12   | 161223.22 | 1757.66  | 84.58  | 1773.28  | 139.14 | 1815.94  | 1542.58 | 1803.00  | 1520.46 | -6002.870013 |
| 1153                   | 30 | 31     | -16.28 | 1.17 | 2204.25 | 1819.20     | 1105.16 | -261967.66 | 792398.38 | 1755.32  | 72.76  | 1773.07  | 121.33 | 1783.84  | 1167.19 | 1782.62  | 1141.05 | -6002.869157 |
| 1154                   | 30 | 32     | -16.26 | 1.19 | 2204.25 | 1751.79     | 969.38  | 580.63     | 6338.16   | 1748.67  | 58.81  | 1766.05  | 103.81 | 1699.37  | 985.57  | 1696.69  | 976.37  | -6002.868481 |
| 1155                   | 30 | 33     | -16.25 | 1.20 | 2204.25 | 1789.96     | 818.86  | 2811.70    | 2176.92   | 1748.59  | 50.57  | 1766.84  | 87.50  | 1752.00  | 846.93  | 1747.40  | 861.09  | -6002.867980 |
| 1156                   | 30 | 34     | -16.21 | 1.24 | 2204.25 | 1819.17     | 977.08  | 2117.29    | 582.08    | 1754.33  | 70.23  | 1771.51  | 117.59 | 1787.03  | 1070.18 | 1806.68  | 1055.29 | -6002.866008 |
| 1157                   | 30 | 35     | -15.98 | 1.47 | 2204.25 | 1890.29     | 1210.52 | -6857.01   | 26475.92  | 1762.50  | 81.76  | 1780.69  | 128.44 | 1842.63  | 1267.51 | 1839.16  | 1236.65 | -6002.864883 |
| 1158                   | 30 | 36     | -15.82 | 1.63 | 2204.25 | 1866.92     | 406.85  | 5109.16    | 13992.11  | 1752.95  | 29.75  | 1775.86  | 55.31  | 1808.89  | 416.08  | 1795.76  | 406.76  | -6002.847352 |
| 1159                   | 30 | 37     | -15.63 | 1.82 | 2204.25 | 1871.01     | 1046.34 | 7077.14    | 12122.09  | 1758.72  | 67.68  | 1779.08  | 117.14 | 1843.36  | 1079.91 | 1840.21  | 1090.34 | -6002.838061 |
| 1160                   | 30 | 38     | -15.10 | 2.35 | 2204.25 | 2030.60     | 1759.53 | 17774.82   | 47727.50  | 1774.92  | 110.22 | 1792.58  | 169.10 | 1959.75  | 1753.48 | 1988.49  | 1795.27 | -6002.813045 |
| 1161                   | 30 | 39     | -14.97 | 2.48 | 2204.25 | 2069.63     | 1811.18 | 2838.30    | 2460.89   | 1775.59  | 108.20 | 1793.77  | 162.84 | 2032.82  | 1894.73 | 2022.21  | 1821.47 | -6002.806706 |
| 1162                   | 30 | 40     | -14.89 | 2.56 | 2204.25 | 2099.06     | 1838.12 | 692.44     | 8077.50   | 1787.45  | 122.05 | 1803.99  | 176.39 | 2043.02  | 1901.82 | 2076.94  | 1950.92 | -6002.802573 |
| 1163                   | 31 | 1*     | -17.72 | 0.00 | 2277.72 | 1690.58     | 441.38  | 3782.34    | 3095.56   | 1786.31  | 31.01  | 1804.22  | 60.11  | 1689.14  | 501.20  | 1664.18  | 482.50  | -6203.036228 |
| 1164                   | 31 | 2      | -17.65 | 0.07 | 2277.72 | 1643.32     | 387.93  | 3283.70    | 1235.37   | 1783.61  | 26.58  | 1800.81  | 52.18  | 1643.26  | 455.81  | 1608.09  | 423.72  | -6203.032421 |

| Polarizability models: |    |        |        |      | n*alp   | DFT results |         | AM model  |           | TL model |        | TE model |        | RP model |         | GD model |         | Etot         |
|------------------------|----|--------|--------|------|---------|-------------|---------|-----------|-----------|----------|--------|----------|--------|----------|---------|----------|---------|--------------|
| i                      | n  | isomer | Eb     | Erel | Aiso    | Aaiso       | Aaiso   | Aaiso     | Aaiso     | Aaiso    | Aaiso  | Aaiso    | Aaiso  | Aaiso    | Aaiso   | Aaiso    | Aaiso   |              |
| 1165                   | 31 | 3      | -17.64 | 0.08 | 2277.72 | 1647.45     | 382.19  | 3047.29   | 1756.08   | 1783.81  | 26.67  | 1801.19  | 52.44  | 1638.20  | 439.07  | 1607.44  | 410.46  | -6203.032281 |
| 1166                   | 31 | 4      | -17.64 | 0.08 | 2277.72 | 1657.75     | 405.79  | 2848.96   | 1731.63   | 1784.37  | 28.87  | 1801.56  | 56.72  | 1666.24  | 496.11  | 1622.47  | 442.17  | -6203.032240 |
| 1167                   | 31 | 5      | -17.64 | 0.08 | 2277.72 | 1661.03     | 390.94  | 3248.20   | 2030.18   | 1784.26  | 28.07  | 1801.58  | 55.10  | 1661.18  | 453.85  | 1621.47  | 418.13  | -6203.031901 |
| 1168                   | 31 | 6      | -17.62 | 0.10 | 2277.72 | 1669.54     | 429.62  | 3033.60   | 1899.89   | 1784.85  | 29.57  | 1802.41  | 57.96  | 1661.97  | 485.31  | 1636.18  | 474.84  | -6203.031292 |
| 1169                   | 31 | 7      | -17.61 | 0.11 | 2277.72 | 1676.25     | 409.50  | 3446.62   | 2505.03   | 1785.38  | 28.95  | 1802.98  | 56.45  | 1674.51  | 466.03  | 1646.18  | 433.48  | -6203.030465 |
| 1170                   | 31 | 8      | -17.60 | 0.12 | 2277.72 | 1668.54     | 424.56  | 3447.05   | 2660.07   | 1784.13  | 28.33  | 1801.19  | 55.90  | 1655.52  | 477.00  | 1637.98  | 463.43  | -6203.030266 |
| 1171                   | 31 | 9      | -17.60 | 0.12 | 2277.72 | 1666.96     | 365.35  | 2944.68   | 1534.46   | 1784.46  | 26.14  | 1802.26  | 51.14  | 1670.10  | 447.87  | 1633.78  | 402.31  | -6203.030063 |
| 1172                   | 31 | 10     | -17.60 | 0.12 | 2277.72 | 1648.53     | 391.11  | 2853.11   | 1591.35   | 1783.70  | 26.81  | 1800.88  | 52.93  | 1652.93  | 465.38  | 1620.64  | 420.30  | -6203.029869 |
| 1173                   | 31 | 11     | -17.58 | 0.14 | 2277.72 | 1664.49     | 396.83  | 2795.75   | 1744.75   | 1784.94  | 29.26  | 1802.45  | 57.73  | 1688.58  | 488.25  | 1632.62  | 429.07  | -6203.028964 |
| 1174                   | 31 | 12     | -17.58 | 0.14 | 2277.72 | 1686.35     | 434.53  | 4601.00   | 4503.89   | 1785.86  | 29.03  | 1803.78  | 56.65  | 1671.90  | 468.66  | 1656.72  | 476.02  | -6203.028904 |
| 1175                   | 31 | 13     | -17.54 | 0.18 | 2277.72 | 1669.60     | 401.53  | 3118.41   | 2055.20   | 1784.44  | 26.64  | 1802.09  | 51.95  | 1671.23  | 452.59  | 1639.91  | 436.74  | -6203.027110 |
| 1176                   | 31 | 14     | -17.52 | 0.20 | 2277.72 | 1648.27     | 368.32  | 2137.39   | 508.75    | 1783.60  | 25.12  | 1801.12  | 49.39  | 1636.06  | 442.04  | 1607.15  | 396.98  | -6203.026355 |
| 1177                   | 31 | 15     | -17.51 | 0.21 | 2277.72 | 1651.11     | 388.76  | 1293.93   | 12396.36  | 1784.11  | 27.59  | 1801.49  | 54.31  | 1658.82  | 465.06  | 1616.15  | 419.87  | -6203.025887 |
| 1178                   | 31 | 16     | -17.51 | 0.21 | 2277.72 | 1653.08     | 426.62  | 3905.45   | 3792.40   | 1784.69  | 29.99  | 1802.09  | 59.34  | 1661.45  | 501.97  | 1668.05  | 535.50  | -6203.025884 |
| 1179                   | 31 | 17     | -17.51 | 0.21 | 2277.72 | 1656.83     | 388.10  | 2680.20   | 1328.76   | 1783.91  | 27.47  | 1801.34  | 54.18  | 1654.53  | 466.22  | 1615.57  | 444.97  | -6203.025806 |
| 1180                   | 31 | 18     | -17.50 | 0.22 | 2277.72 | 1645.83     | 346.05  | -4011.30  | 18375.15  | 1783.21  | 23.64  | 1800.63  | 45.96  | 1642.68  | 409.67  | 1617.32  | 376.67  | -6203.025239 |
| 1181                   | 31 | 19     | -17.50 | 0.22 | 2277.72 | 1645.10     | 321.52  | 2895.42   | 1894.68   | 1783.73  | 21.93  | 1801.83  | 42.23  | 1625.45  | 400.70  | 1604.09  | 353.69  | -6203.025066 |
| 1182                   | 31 | 20     | -17.49 | 0.23 | 2277.72 | 1693.17     | 453.30  | 3565.67   | 2837.53   | 1786.57  | 31.23  | 1804.67  | 60.96  | 1678.23  | 503.03  | 1659.55  | 499.01  | -6203.024455 |
| 1183                   | 31 | 21     | -17.48 | 0.24 | 2277.72 | 1661.09     | 410.83  | 3261.88   | 2936.30   | 1784.27  | 27.14  | 1802.02  | 53.54  | 1640.12  | 455.21  | 1617.38  | 440.32  | -6203.024211 |
| 1184                   | 31 | 22     | -17.48 | 0.24 | 2277.72 | 1667.66     | 409.96  | 2730.89   | 4283.37   | 1784.85  | 26.40  | 1802.79  | 51.11  | 1651.75  | 456.63  | 1634.89  | 440.01  | -6203.024195 |
| 1185                   | 31 | 23     | -17.48 | 0.24 | 2277.72 | 1659.20     | 365.35  | 2687.90   | 1293.28   | 1784.70  | 25.76  | 1802.69  | 50.04  | 1646.03  | 444.73  | 1576.48  | 354.09  | -6203.023971 |
| 1186                   | 31 | 24     | -17.48 | 0.24 | 2277.72 | 1662.23     | 369.45  | 2756.80   | 1210.33   | 1783.00  | 25.49  | 1799.81  | 50.39  | 1654.94  | 422.93  | 1635.26  | 393.53  | -6203.023933 |
| 1187                   | 31 | 25     | -17.45 | 0.27 | 2277.72 | 1645.46     | 284.24  | 1717.24   | 3235.24   | 1782.04  | 19.59  | 1798.88  | 38.35  | 1652.64  | 369.17  | 1629.28  | 301.43  | -6203.022486 |
| 1188                   | 31 | 26     | -17.40 | 0.32 | 2277.72 | 1635.96     | 240.98  | 68810.00  | 199406.95 | 1781.12  | 16.93  | 1797.68  | 33.14  | 1635.67  | 325.12  | 1640.06  | 216.38  | -6203.020354 |
| 1189                   | 31 | 27     | -17.38 | 0.34 | 2277.72 | 1684.38     | 383.01  | 3448.70   | 3216.58   | 1785.18  | 26.43  | 1803.32  | 51.75  | 1660.07  | 434.77  | 1648.20  | 415.74  | -6203.018991 |
| 1190                   | 31 | 28     | -17.35 | 0.37 | 2277.72 | 1666.12     | 375.47  | 3753.39   | 3660.94   | 1783.74  | 24.43  | 1801.20  | 47.52  | 1659.03  | 422.46  | 1643.41  | 399.93  | -6203.017712 |
| 1191                   | 31 | 29     | -17.35 | 0.37 | 2277.72 | 1659.10     | 396.93  | 2404.75   | 1463.20   | 1784.18  | 26.88  | 1801.92  | 52.89  | 1661.12  | 484.42  | 1613.67  | 430.98  | -6203.017494 |
| 1192                   | 31 | 30     | -17.29 | 0.43 | 2277.72 | 1702.11     | 368.09  | 3517.76   | 2870.79   | 1785.70  | 25.64  | 1804.32  | 49.75  | 1690.80  | 428.57  | 1671.00  | 395.86  | -6203.014932 |
| 1193                   | 31 | 31     | -16.97 | 0.75 | 2277.72 | 1724.95     | 902.61  | 2856.81   | 2758.53   | 1791.87  | 63.03  | 1809.07  | 111.97 | 1719.86  | 994.82  | 1709.33  | 958.09  | -6202.998982 |
| 1194                   | 31 | 32     | -16.95 | 0.77 | 2277.72 | 1710.47     | 357.75  | 1624.28   | 4277.93   | 1785.22  | 25.07  | 1803.92  | 48.96  | 1681.53  | 393.12  | 1663.95  | 363.03  | -6202.997952 |
| 1195                   | 31 | 33     | -16.71 | 1.01 | 2277.72 | 1754.66     | 756.86  | 3951.00   | 4393.62   | 1793.43  | 49.17  | 1814.65  | 96.76  | 1715.75  | 791.55  | 1706.88  | 788.37  | -6202.986189 |
| 1196                   | 31 | 34     | -16.41 | 1.31 | 2277.72 | 1854.77     | 1024.68 | 8130.91   | 17625.34  | 1800.62  | 66.06  | 1820.89  | 110.73 | 1817.04  | 1060.32 | 1827.68  | 1045.23 | -6202.971330 |
| 1197                   | 31 | 35     | -16.19 | 1.53 | 2277.72 | 1798.39     | 843.47  | 4261.17   | 5486.51   | 1795.58  | 59.82  | 1815.86  | 109.14 | 1765.94  | 900.53  | 1759.77  | 896.59  | -6202.960587 |
| 1198                   | 31 | 36     | -15.95 | 1.77 | 2277.72 | 1970.32     | 1209.90 | 203697.88 | 610506.28 | 1808.29  | 76.26  | 1829.71  | 124.74 | 1918.06  | 1246.16 | 1929.77  | 1252.41 | -6202.948608 |
| 1199                   | 31 | 37     | -15.79 | 1.93 | 2277.72 | 1886.40     | 1025.05 | 3852.61   | 5022.30   | 1804.63  | 71.15  | 1827.07  | 117.16 | 1807.66  | 1012.89 | 1828.69  | 1054.77 | -6202.940633 |
| 1200                   | 31 | 38     | -15.70 | 2.02 | 2277.72 | 1828.60     | 498.84  | 2676.46   | 1545.31   | 1791.84  | 32.77  | 1814.21  | 60.56  | 1776.82  | 504.03  | 1794.89  | 560.24  | -6202.936445 |
| 1201                   | 31 | 39     | -15.69 | 2.03 | 2277.72 | 1924.72     | 1159.53 | -3127.97  | 16902.52  | 1808.52  | 80.27  | 1830.63  | 130.24 | 1868.00  | 1160.40 | 1888.03  | 1210.55 | -6202.935763 |
| 1202                   | 31 | 40     | -14.85 | 2.87 | 2277.72 | 2322.55     | 2479.67 | 159.89    | 7974.83   | 1854.23  | 154.97 | 1870.08  | 208.51 | 2228.87  | 2481.71 | 2269.30  | 2549.98 | -6202.894190 |
| 1203                   | 32 | 1*     | -17.88 | 0.00 | 2351.20 | 1692.45     | 355.37  | 3693.82   | 5622.20   | 1831.01  | 25.38  | 1851.76  | 49.14  | 1676.40  | 433.27  | 1643.25  | 390.72  | -6403.141877 |
| 1204                   | 32 | 2      | -17.84 | 0.04 | 2351.20 | 1701.42     | 357.39  | 5697.22   | 8833.09   | 1831.73  | 26.77  | 1852.56  | 51.56  | 1689.62  | 411.77  | 1673.72  | 418.28  | -6403.140134 |
| 1205                   | 32 | 3      | -17.83 | 0.05 | 2351.20 | 1685.28     | 248.42  | 2732.34   | 331.31    | 1828.14  | 16.56  | 1847.39  | 32.66  | 1718.15  | 335.29  | 1689.07  | 218.37  | -6403.139312 |
| 1206                   | 32 | 4      | -17.81 | 0.07 | 2351.20 | 1713.01     | 362.43  | 3261.91   | 2148.08   | 1831.95  | 25.28  | 1853.16  | 48.41  | 1684.70  | 422.45  | 1670.16  | 401.30  | -6403.138468 |
| 1207                   | 32 | 5      | -17.80 | 0.08 | 2351.20 | 1699.77     | 347.72  | 3069.15   | 1684.13   | 1831.26  | 25.80  | 1852.02  | 49.76  | 1693.73  | 420.90  | 1656.08  | 382.43  | -6403.138020 |
| 1208                   | 32 | 6      | -17.79 | 0.09 | 2351.20 | 1693.43     | 312.28  | 2795.87   | 1185.06   | 1829.94  | 22.06  | 1850.29  | 42.68  | 1686.27  | 385.24  | 1661.72  | 345.82  | -6403.137447 |
| 1209                   | 32 | 7      | -17.79 | 0.09 | 2351.20 | 1728.23     | 375.27  | 3498.18   | 2359.52   | 1833.10  | 28.62  | 1854.22  | 54.64  | 1725.09  | 444.59  | 1685.94  | 409.96  | -6403.137303 |
| 1210                   | 32 | 8      | -17.78 | 0.10 | 2351.20 | 1722.09     | 407.01  | 2807.65   | 1763.53   | 1832.38  | 27.95  | 1853.38  | 53.87  | 1698.34  | 439.12  | 1678.29  | 451.82  | -6403.137034 |
| 1211                   | 32 | 9      | -17.78 | 0.10 | 2351.20 | 1722.29     | 436.36  | 3682.29   | 6516.92   | 1832.81  | 29.37  | 1853.89  | 56.20  | 1686.81  | 460.32  | 1678.22  | 479.35  | -6403.136916 |
| 1212                   | 32 | 10     | -17.77 | 0.11 | 2351.20 | 1705.28     | 367.92  | 1187.48   | 4362.81   | 1831.72  | 27.65  | 1852.50  | 53.08  | 1700.19  | 439.60  | 1659.22  | 397.85  | -6403.136539 |
| 1213                   | 32 | 11     | -17.76 | 0.12 | 2351.20 | 1713.97     | 403.44  | 2737.96   | 2159.19   | 1832.55  | 28.19  | 1853.60  | 54.01  | 1692.85  | 450.59  | 1669.89  | 447.14  | -6403.135866 |
| 1214                   | 32 | 12     | -17.74 | 0.14 | 2351.20 | 1709.07     | 345.32  | 2375.16   | 1551.23   | 1832.18  | 25.82  | 1853.31  | 49.41  | 1711.78  | 409.96  | 1653.45  | 394.87  | -6403.135132 |
| 1215                   | 32 | 13     | -17.74 | 0.14 | 2351.20 | 1713.01     | 287.39  | 2542.12   | 675.17    | 1830.64  | 21.93  | 1851.14  | 41.99  | 1708.35  | 361.78  | 1678.51  | 320.39  | -6403.135098 |

| Polarizability models: |    |        |        | n*alp | DFT results |         | AM model |           | TL model |         | TE model |         | RP model |         | GD model |         | Etot    |              |
|------------------------|----|--------|--------|-------|-------------|---------|----------|-----------|----------|---------|----------|---------|----------|---------|----------|---------|---------|--------------|
| i                      | n  | isomer | Eb     | Erel  | Aiso        | Aaiso   | Aiso     | Aaiso     | Aiso     | Aaiso   | Aiso     | Aaiso   | Aiso     | Aaiso   | Aiso     | Aaiso   |         |              |
| 1216                   | 32 | 14     | -17.74 | 0.14  | 2351.20     | 1715.17 | 431.42   | 2892.97   | 2147.68  | 1832.82 | 30.32    | 1853.91 | 58.51    | 1699.16 | 480.60   | 1663.97 | 478.34  | -6403.134976 |
| 1217                   | 32 | 15     | -17.73 | 0.15  | 2351.20     | 1711.18 | 338.20   | 3196.94   | 1896.02  | 1831.32 | 23.54    | 1852.14 | 45.31    | 1715.86 | 403.92   | 1670.20 | 394.03  | -6403.134531 |
| 1218                   | 32 | 16     | -17.72 | 0.16  | 2351.20     | 1717.72 | 415.15   | 3002.80   | 1820.92  | 1832.60 | 28.58    | 1853.66 | 54.46    | 1700.27 | 464.10   | 1646.03 | 440.23  | -6403.134081 |
| 1219                   | 32 | 17     | -17.72 | 0.16  | 2351.20     | 1713.36 | 409.99   | -22643.90 | 74146.38 | 1832.58 | 29.26    | 1853.64 | 56.28    | 1707.93 | 475.78   | 1671.67 | 449.27  | -6403.134011 |
| 1220                   | 32 | 18     | -17.72 | 0.16  | 2351.20     | 1727.52 | 386.37   | 3828.95   | 3317.79  | 1832.22 | 26.59    | 1853.13 | 50.83    | 1712.61 | 424.50   | 1693.05 | 422.74  | -6403.133889 |
| 1221                   | 32 | 19     | -17.72 | 0.16  | 2351.20     | 1698.64 | 352.97   | 2560.86   | 887.74   | 1830.81 | 25.44    | 1851.28 | 49.61    | 1693.12 | 424.85   | 1657.47 | 381.93  | -6403.133762 |
| 1222                   | 32 | 20     | -17.68 | 0.20  | 2351.20     | 1699.09 | 287.60   | 31345.65  | 85728.62 | 1829.67 | 20.94    | 1849.82 | 40.63    | 1698.49 | 338.14   | 1681.02 | 286.52  | -6403.131684 |
| 1223                   | 32 | 21     | -17.67 | 0.21  | 2351.20     | 1719.32 | 367.96   | 4196.62   | 3914.63  | 1832.44 | 25.82    | 1853.63 | 49.37    | 1709.02 | 414.78   | 1680.15 | 405.75  | -6403.131641 |
| 1224                   | 32 | 22     | -17.63 | 0.25  | 2351.20     | 1750.64 | 286.64   | 3662.89   | 2542.73  | 1832.95 | 24.84    | 1854.41 | 46.61    | 1740.30 | 352.34   | 1715.68 | 322.32  | -6403.129309 |
| 1225                   | 32 | 23     | -17.62 | 0.26  | 2351.20     | 1712.22 | 377.09   | 3896.30   | 5286.02  | 1831.84 | 26.74    | 1852.87 | 51.18    | 1695.71 | 427.57   | 1676.36 | 412.50  | -6403.128717 |
| 1226                   | 32 | 24     | -17.58 | 0.30  | 2351.20     | 1735.23 | 337.09   | 8301.98   | 15384.12 | 1832.68 | 25.97    | 1854.02 | 49.79    | 1724.03 | 394.07   | 1702.62 | 366.98  | -6403.126744 |
| 1227                   | 32 | 25     | -17.56 | 0.32  | 2351.20     | 1757.10 | 424.69   | 3579.49   | 2878.02  | 1832.99 | 27.08    | 1854.53 | 52.25    | 1727.31 | 441.31   | 1730.27 | 466.55  | -6403.125758 |
| 1228                   | 32 | 26     | -17.44 | 0.44  | 2351.20     | 1728.28 | 231.47   | 2549.97   | 761.19   | 1830.85 | 17.41    | 1851.62 | 32.13    | 1736.78 | 246.44   | 1754.16 | 178.49  | -6403.119814 |
| 1229                   | 32 | 27     | -17.41 | 0.47  | 2351.20     | 1727.10 | 261.55   | 3377.09   | 2450.93  | 1830.97 | 19.81    | 1851.78 | 36.75    | 1719.41 | 307.64   | 1712.10 | 263.07  | -6403.118235 |
| 1230                   | 32 | 28     | -17.16 | 0.72  | 2351.20     | 1773.06 | 396.09   | 2234.91   | 3032.32  | 1832.96 | 25.76    | 1854.89 | 49.95    | 1726.70 | 408.25   | 1725.91 | 409.57  | -6403.105166 |
| 1231                   | 32 | 29     | -17.10 | 0.78  | 2351.20     | 1831.86 | 920.54   | 4863.95   | 7153.06  | 1844.40 | 65.77    | 1867.35 | 113.16   | 1793.93 | 961.81   | 1785.44 | 925.35  | -6403.102406 |
| 1232                   | 32 | 30     | -16.65 | 1.23  | 2351.20     | 1860.65 | 1041.79  | 3697.46   | 4279.93  | 1845.39 | 71.70    | 1866.96 | 121.98   | 1841.09 | 1132.64  | 1830.07 | 1077.84 | -6403.079481 |
| 1233                   | 32 | 31     | -16.61 | 1.27  | 2351.20     | 1902.87 | 1058.05  | -1167.98  | 10674.64 | 1849.32 | 68.54    | 1873.37 | 114.30   | 1863.70 | 1105.81  | 1852.49 | 1100.69 | -6403.077442 |
| 1234                   | 32 | 32     | -16.58 | 1.30  | 2351.20     | 1831.77 | 407.56   | 3739.69   | 2903.24  | 1837.49 | 27.88    | 1861.88 | 52.25    | 1778.17 | 431.64   | 1782.03 | 448.37  | -6403.075753 |
| 1235                   | 32 | 33     | -16.17 | 1.71  | 2351.20     | 1942.04 | 935.76   | 8411.39   | 20236.71 | 1850.04 | 59.12    | 1875.73 | 98.53    | 1916.06 | 1008.24  | 1900.09 | 997.64  | -6403.054873 |
| 1236                   | 32 | 34     | -15.86 | 2.02  | 2351.20     | 1946.17 | 913.76   | -5079.06  | 23914.77 | 1846.57 | 54.43    | 1872.65 | 100.91   | 1897.13 | 929.81   | 1897.49 | 913.42  | -6403.038870 |
| 1237                   | 32 | 35     | -15.52 | 2.36  | 2351.20     | 2082.42 | 1017.05  | 1437.01   | 11121.40 | 1856.36 | 58.98    | 1884.52 | 105.35   | 2035.24 | 1027.13  | 2025.12 | 1014.01 | -6403.021653 |

Table S2. The BP86/6-31G(d) optimized Cartesian coordinates and energies of the 1237 cluster isomers Mg<sub>2</sub>-Mg<sub>32</sub> considered in the study. All coordinates in Å,  $E_{tot}$  in Hartree,  $E_b$  in kcal/mol.

|                                                         |           |           |           |  |
|---------------------------------------------------------|-----------|-----------|-----------|--|
| @mg02-isomer01 bp86/6-31G(d) Etot=-400.142698 Eb=-1.03  |           |           |           |  |
| Mg1                                                     | 1.780662  | 0.000000  | 0.000000  |  |
| Mg2                                                     | -1.780662 | 0.000000  | 0.000000  |  |
| @mg03-isomer01 bp86/6-31G(d) Etot=-600.224345 Eb=-3.18  |           |           |           |  |
| Mg1                                                     | 0.000000  | 1.902376  | 0.000000  |  |
| Mg2                                                     | 1.647506  | -0.951188 | 0.000000  |  |
| Mg3                                                     | -1.647506 | -0.951188 | 0.000000  |  |
| @mg04-isomer01 bp86/6-31G(d) Etot=-800.323396 Eb=-6.99  |           |           |           |  |
| Mg1                                                     | -1.096804 | 1.096804  | -1.096804 |  |
| Mg2                                                     | 1.096804  | 1.096804  | 1.096804  |  |
| Mg3                                                     | -1.096804 | -1.096804 | 1.096804  |  |
| Mg4                                                     | 1.096804  | -1.096804 | -1.096804 |  |
| @mg04-isomer02 bp86/6-31G(d) Etot=-800.300209 Eb=-3.35  |           |           |           |  |
| Mg1                                                     | -2.249527 | -1.632649 | 0.000056  |  |
| Mg2                                                     | 3.930773  | 0.000002  | 0.000093  |  |
| Mg3                                                     | -2.247226 | 1.633987  | 0.000055  |  |
| Mg4                                                     | 0.565980  | -0.001340 | -0.000204 |  |
| @mg05-isomer01 bp86/6-31G(d) Etot=-1000.404667 Eb=-7.04 |           |           |           |  |
| Mg1                                                     | 2.836517  | -0.000081 | 0.000116  |  |
| Mg2                                                     | 0.000950  | 1.740961  | -0.061305 |  |
| Mg3                                                     | -2.836797 | 0.000708  | 0.000092  |  |
| Mg4                                                     | -0.000331 | -0.817760 | 1.538392  |  |
| Mg5                                                     | -0.000339 | -0.923828 | -1.477295 |  |
| @mg05-isomer02 bp86/6-31G(d) Etot=-1000.400777 Eb=-6.56 |           |           |           |  |
| Mg1                                                     | -4.136871 | -0.000023 | 0.000006  |  |
| Mg2                                                     | -0.863485 | 0.000020  | 0.000307  |  |
| Mg3                                                     | 1.667083  | -0.572978 | 1.685889  |  |
| Mg4                                                     | 1.666577  | -1.173642 | -1.339309 |  |
| Mg5                                                     | 1.666695  | 1.746623  | -0.346893 |  |
| @mg05-isomer03 bp86/6-31G(d) Etot=-1000.380032 Eb=-3.95 |           |           |           |  |
| Mg1                                                     | 1.341641  | 2.385274  | 0.000001  |  |
| Mg2                                                     | 2.683736  | -0.538866 | -0.000002 |  |
| Mg3                                                     | -1.854239 | 2.013030  | 0.000001  |  |
| Mg4                                                     | 0.316729  | -2.718088 | 0.000003  |  |
| Mg5                                                     | -2.487868 | -1.141350 | -0.000003 |  |
| @mg05-isomer04 bp86/6-31G(d) Etot=-1000.376405 Eb=-3.50 |           |           |           |  |
| Mg1                                                     | -4.622874 | 1.430906  | -0.001440 |  |
| Mg2                                                     | -1.604091 | -0.018902 | 0.003906  |  |
| Mg3                                                     | 4.622883  | 1.430898  | 0.001082  |  |
| Mg4                                                     | -0.000064 | -2.823903 | -0.000185 |  |
| Mg5                                                     | 1.604146  | -0.018999 | -0.003363 |  |
| @mg05-isomer05 bp86/6-31G(d) Etot=-1000.375797 Eb=-3.42 |           |           |           |  |
| Mg1                                                     | 3.674906  | -1.624342 | -0.002562 |  |
| Mg2                                                     | 3.670783  | 1.628293  | -0.002538 |  |
| Mg3                                                     | -5.809367 | 0.003484  | -0.002828 |  |
| Mg4                                                     | 0.867596  | -0.001662 | 0.006528  |  |
| Mg5                                                     | -2.403918 | -0.005773 | 0.001399  |  |
| @mg06-isomer01 bp86/6-31G(d) Etot=-1200.488831 Eb=-7.38 |           |           |           |  |
| Mg1                                                     | -1.889693 | 1.738591  | -0.000021 |  |
| Mg2                                                     | 1.889700  | 1.738593  | -0.000002 |  |
| Mg3                                                     | 0.000009  | -0.405637 | -1.469603 |  |

|                                                         |           |           |           |  |
|---------------------------------------------------------|-----------|-----------|-----------|--|
| Mg4                                                     | -2.802135 | -1.332971 | 0.000006  |  |
| Mg5                                                     | -0.000014 | -0.405597 | 1.469615  |  |
| Mg6                                                     | 2.802132  | -1.332979 | 0.000005  |  |
| @mg06-isomer02 bp86/6-31G(d) Etot=-1200.487224 Eb=-7.21 |           |           |           |  |
| Mg1                                                     | 1.705210  | 1.644287  | -0.000001 |  |
| Mg2                                                     | 3.466324  | -1.070474 | 0.000000  |  |
| Mg3                                                     | 0.276803  | -1.263339 | -0.000011 |  |
| Mg4                                                     | -2.897758 | -1.316386 | 0.000000  |  |
| Mg5                                                     | -1.275297 | 1.002964  | -1.492371 |  |
| Mg6                                                     | -1.275281 | 1.002948  | 1.492383  |  |
| @mg06-isomer03 bp86/6-31G(d) Etot=-1200.482144 Eb=-6.68 |           |           |           |  |
| Mg1                                                     | -1.718019 | 0.000020  | 1.498576  |  |
| Mg2                                                     | -1.718023 | 0.000020  | -1.498573 |  |
| Mg3                                                     | -0.829918 | -2.819375 | -0.000001 |  |
| Mg4                                                     | -0.829832 | 2.819389  | -0.000001 |  |
| Mg5                                                     | 4.182200  | -0.000034 | 0.000000  |  |
| Mg6                                                     | 0.913592  | -0.000019 | -0.000002 |  |
| @mg06-isomer04 bp86/6-31G(d) Etot=-1200.481561 Eb=-6.62 |           |           |           |  |
| Mg1                                                     | -3.884322 | -0.000250 | 0.000065  |  |
| Mg2                                                     | -0.994868 | -1.736163 | -0.027112 |  |
| Mg3                                                     | 1.770386  | 0.000298  | -0.000065 |  |
| Mg4                                                     | 5.099019  | -0.000185 | 0.000043  |  |
| Mg5                                                     | -0.995070 | 0.844683  | 1.517121  |  |
| Mg6                                                     | -0.995145 | 0.891617  | -1.490053 |  |
| @mg06-isomer05 bp86/6-31G(d) Etot=-1200.478280 Eb=-6.28 |           |           |           |  |
| Mg1                                                     | -0.000203 | -2.025753 | -1.534227 |  |
| Mg2                                                     | 1.542358  | 0.151258  | -0.000145 |  |
| Mg3                                                     | 4.317685  | 1.874020  | 0.000005  |  |
| Mg4                                                     | -4.317699 | 1.874006  | 0.000006  |  |
| Mg5                                                     | -1.541945 | 0.151844  | -0.000140 |  |
| Mg6                                                     | -0.000196 | -2.025375 | 1.534502  |  |
| @mg06-isomer06 bp86/6-31G(d) Etot=-1200.476980 Eb=-6.14 |           |           |           |  |
| Mg1                                                     | 2.832548  | 0.000067  | 0.000005  |  |
| Mg2                                                     | 6.202165  | -0.000039 | -0.000004 |  |
| Mg3                                                     | -2.892318 | -1.559823 | -0.849027 |  |
| Mg4                                                     | -2.892338 | 1.515165  | -0.926341 |  |
| Mg5                                                     | -2.892379 | 0.044627  | 1.775329  |  |
| Mg6                                                     | -0.357679 | 0.000004  | 0.000038  |  |
| @mg06-isomer07 bp86/6-31G(d) Etot=-1200.464364 Eb=-4.82 |           |           |           |  |
| Mg1                                                     | 0.393721  | -2.018765 | -1.359688 |  |
| Mg2                                                     | 1.637459  | -0.799556 | 1.660961  |  |
| Mg3                                                     | 1.801074  | 1.168213  | -1.212846 |  |
| Mg4                                                     | -1.637463 | 0.799554  | -1.660953 |  |
| Mg5                                                     | -1.801093 | -1.168211 | 1.212842  |  |
| Mg6                                                     | -0.393698 | 2.018765  | 1.359683  |  |
| @mg06-isomer08 bp86/6-31G(d) Etot=-1200.459470 Eb=-4.31 |           |           |           |  |
| Mg1                                                     | 4.389200  | 1.155680  | -1.155249 |  |
| Mg2                                                     | 1.598551  | -0.000040 | -0.000045 |  |
| Mg3                                                     | -1.598553 | -0.000034 | 0.000026  |  |
| Mg4                                                     | -4.389211 | -1.156654 | -1.154250 |  |
| Mg5                                                     | -4.389192 | 1.156691  | 1.154249  |  |
| Mg6                                                     | 4.389205  | -1.155643 | 1.155269  |  |
| @mg06-isomer09 bp86/6-31G(d) Etot=-1200.457757 Eb=-4.13 |           |           |           |  |
| Mg1                                                     | -3.245675 | 1.601869  | 0.000032  |  |
| Mg2                                                     | -0.172046 | 2.490803  | -0.000031 |  |
| Mg3                                                     | 5.047188  | -0.000555 | 0.000062  |  |

|                                                         |           |           |           |
|---------------------------------------------------------|-----------|-----------|-----------|
| Mg4                                                     | 1.783382  | 0.002043  | -0.000064 |
| Mg5                                                     | -0.168950 | -2.489212 | -0.000031 |
| Mg6                                                     | -3.243899 | -1.604947 | 0.000032  |
| @mg06-isomer10 bp86/6-31G(d) Etot=-1200.452844 Eb=-3.62 |           |           |           |
| Mg1                                                     | -2.722223 | -4.404174 | 0.000078  |
| Mg2                                                     | -0.967637 | -1.567699 | -0.000400 |
| Mg3                                                     | 1.841767  | -0.054290 | 0.000276  |
| Mg4                                                     | 5.175491  | -0.154936 | -0.000162 |
| Mg5                                                     | -2.453862 | 4.559080  | -0.000215 |
| Mg6                                                     | -0.873536 | 1.622018  | 0.000423  |
| @mg07-isomer01 bp86/6-31G(d) Etot=-1400.583646 Eb=-8.58 |           |           |           |
| Mg1                                                     | -0.495079 | -2.792633 | 0.000064  |
| Mg2                                                     | -1.240265 | 2.550878  | -0.000013 |
| Mg3                                                     | -2.809557 | -0.391881 | -0.000227 |
| Mg4                                                     | 2.503007  | -1.334190 | -0.000224 |
| Mg5                                                     | 2.042639  | 1.967879  | 0.000030  |
| Mg6                                                     | -0.000415 | -0.000108 | 1.450759  |
| Mg7                                                     | -0.000331 | 0.000055  | -1.450389 |
| @mg07-isomer02 bp86/6-31G(d) Etot=-1400.580557 Eb=-8.30 |           |           |           |
| Mg1                                                     | 3.043445  | 0.745202  | -1.206559 |
| Mg2                                                     | -1.337400 | -1.089216 | 1.385999  |
| Mg3                                                     | -3.043451 | -0.745692 | -1.206206 |
| Mg4                                                     | -2.140686 | 1.740657  | 0.456616  |
| Mg5                                                     | 2.140534  | -1.740513 | 0.457130  |
| Mg6                                                     | -0.000098 | -0.000144 | -1.272649 |
| Mg7                                                     | 1.337656  | 1.089705  | 1.385668  |
| @mg07-isomer03 bp86/6-31G(d) Etot=-1400.579466 Eb=-8.20 |           |           |           |
| Mg1                                                     | 3.693897  | 0.000261  | -0.000076 |
| Mg2                                                     | -1.749321 | 2.793138  | -0.000040 |
| Mg3                                                     | -1.250963 | -0.000063 | -1.449735 |
| Mg4                                                     | -1.748936 | -2.793321 | -0.000067 |
| Mg5                                                     | -1.251110 | -0.000083 | 1.449696  |
| Mg6                                                     | 1.153083  | 1.757622  | 0.000099  |
| Mg7                                                     | 1.153350  | -1.757553 | 0.000125  |
| @mg07-isomer04 bp86/6-31G(d) Etot=-1400.577931 Eb=-8.07 |           |           |           |
| Mg1                                                     | 1.427252  | 1.475880  | -0.837356 |
| Mg2                                                     | -2.274701 | -2.344662 | 0.368894  |
| Mg3                                                     | -0.002149 | 0.002354  | 1.403815  |
| Mg4                                                     | 3.169959  | -0.792001 | 0.367748  |
| Mg5                                                     | -0.898251 | 3.139759  | 0.370429  |
| Mg6                                                     | 0.564913  | -1.979824 | -0.831171 |
| Mg7                                                     | -1.987024 | 0.498494  | -0.842360 |
| @mg07-isomer05 bp86/6-31G(d) Etot=-1400.573298 Eb=-7.65 |           |           |           |
| Mg1                                                     | -0.000244 | -2.007203 | 1.469646  |
| Mg2                                                     | -2.590365 | -0.835461 | -0.000408 |
| Mg3                                                     | 2.590337  | -0.835488 | 0.000265  |
| Mg4                                                     | 2.676725  | 2.413128  | -0.000188 |
| Mg5                                                     | -2.676712 | 2.413127  | 0.000196  |
| Mg6                                                     | 0.000244  | -2.008231 | -1.469030 |
| Mg7                                                     | 0.000014  | 0.860128  | -0.000481 |
| @mg07-isomer06 bp86/6-31G(d) Etot=-1400.569708 Eb=-7.33 |           |           |           |
| Mg1                                                     | 0.975000  | 0.325965  | -1.262665 |
| Mg2                                                     | 2.173429  | -0.427973 | 1.534520  |
| Mg3                                                     | -2.173574 | -0.428920 | -1.534310 |
| Mg4                                                     | -3.978259 | 1.242948  | 0.528519  |
| Mg5                                                     | 3.978375  | 1.242582  | -0.529090 |
| Mg6                                                     | 0.000335  | -2.280508 | 0.000342  |

|                                                         |           |           |           |  |
|---------------------------------------------------------|-----------|-----------|-----------|--|
| Mg7                                                     | -0.975306 | 0.325906  | 1.262685  |  |
| @mg07-isomer07 bp86/6-31G(d) Etot=-1400.566380 Eb=-7.03 |           |           |           |  |
| Mg1                                                     | -3.036991 | 2.131168  | 0.000036  |  |
| Mg2                                                     | 0.183347  | -2.409901 | -0.000104 |  |
| Mg3                                                     | 5.393493  | 0.707847  | -0.000787 |  |
| Mg4                                                     | -0.714637 | 0.284136  | -1.463097 |  |
| Mg5                                                     | -3.285114 | -1.038449 | -0.001002 |  |
| Mg6                                                     | 2.175439  | 0.041766  | 0.001289  |  |
| Mg7                                                     | -0.715537 | 0.283434  | 1.463665  |  |
| @mg07-isomer08 bp86/6-31G(d) Etot=-1400.565617 Eb=-6.96 |           |           |           |  |
| Mg1                                                     | 0.000000  | -1.465241 | 1.485593  |  |
| Mg2                                                     | 0.000651  | -1.464642 | -1.485599 |  |
| Mg3                                                     | 5.422009  | 0.790572  | -0.000513 |  |
| Mg4                                                     | -3.853630 | 1.915323  | -0.000063 |  |
| Mg5                                                     | -3.034623 | -1.164055 | -0.000652 |  |
| Mg6                                                     | 2.222964  | 0.206087  | 0.000826  |  |
| Mg7                                                     | -0.757371 | 1.181956  | 0.000407  |  |
| @mg07-isomer09 bp86/6-31G(d) Etot=-1400.565055 Eb=-6.91 |           |           |           |  |
| Mg1                                                     | 2.571146  | 0.492002  | -0.008452 |  |
| Mg2                                                     | 0.480549  | -1.893782 | -0.001820 |  |
| Mg3                                                     | -2.375870 | -0.861291 | 1.493962  |  |
| Mg4                                                     | -3.631108 | 1.631394  | 0.001579  |  |
| Mg5                                                     | 5.834588  | 0.344322  | 0.005737  |  |
| Mg6                                                     | -2.388167 | -0.872234 | -1.482339 |  |
| Mg7                                                     | -0.491138 | 1.159590  | -0.008666 |  |
| @mg07-isomer10 bp86/6-31G(d) Etot=-1400.558857 Eb=-6.36 |           |           |           |  |
| Mg1                                                     | -0.000090 | -0.038257 | 1.731931  |  |
| Mg2                                                     | -2.802696 | -0.027466 | 0.000446  |  |
| Mg3                                                     | 2.802684  | 0.026664  | 0.001969  |  |
| Mg4                                                     | -0.012048 | 1.517204  | -0.831262 |  |
| Mg5                                                     | -6.124277 | 0.010506  | -0.002918 |  |
| Mg6                                                     | 6.124295  | -0.008349 | -0.003449 |  |
| Mg7                                                     | 0.012133  | -1.480302 | -0.896718 |  |
| @mg07-isomer11 bp86/6-31G(d) Etot=-1400.558521 Eb=-6.33 |           |           |           |  |
| Mg1                                                     | -3.050880 | -0.002465 | -0.000543 |  |
| Mg2                                                     | 2.778600  | 0.001050  | 1.492626  |  |
| Mg3                                                     | 2.775038  | 0.001083  | -1.494716 |  |
| Mg4                                                     | -6.409930 | 0.000508  | 0.000318  |  |
| Mg5                                                     | 1.884276  | 2.810381  | 0.000167  |  |
| Mg6                                                     | 1.888339  | -2.809665 | 0.000149  |  |
| Mg7                                                     | 0.134556  | -0.000892 | 0.002000  |  |
| @mg07-isomer12 bp86/6-31G(d) Etot=-1400.557669 Eb=-6.25 |           |           |           |  |
| Mg1                                                     | 0.578433  | 0.003985  | 0.001298  |  |
| Mg2                                                     | 7.196361  | -0.009613 | -0.000419 |  |
| Mg3                                                     | -2.165388 | -1.037685 | -1.388587 |  |
| Mg4                                                     | -5.078792 | -0.004763 | -0.001205 |  |
| Mg5                                                     | -2.170483 | 1.720689  | -0.203557 |  |
| Mg6                                                     | 3.807023  | 0.012180  | -0.000231 |  |
| Mg7                                                     | -2.167154 | -0.684793 | 1.592701  |  |
| @mg07-isomer13 bp86/6-31G(d) Etot=-1400.555887 Eb=-6.09 |           |           |           |  |
| Mg1                                                     | -0.001793 | -1.772751 | 0.032776  |  |
| Mg2                                                     | 0.000500  | 0.004618  | 2.527611  |  |
| Mg3                                                     | -4.246818 | 2.455844  | -0.872292 |  |
| Mg4                                                     | 4.252835  | 2.445505  | -0.872266 |  |
| Mg5                                                     | -0.005898 | -4.905099 | -0.871095 |  |
| Mg6                                                     | -1.534374 | 0.887232  | 0.028036  |  |
| Mg7                                                     | 1.535549  | 0.884653  | 0.027230  |  |



@mg07-isomer14 bp86/6-31G(d) Etot=-1400.554529 Eb=-5.97  
Mg1 -2.537624 0.452041 0.000966  
Mg2 0.409435 -0.451398 -0.014161  
Mg3 6.798180 0.981213 0.021384  
Mg4 -1.700385 -2.066584 1.543613  
Mg5 -4.744089 2.857047 0.001096  
Mg6 3.496875 0.315932 -0.034848  
Mg7 -1.722391 -2.088253 -1.518050

@mg07-isomer15 bp86/6-31G(d) Etot=-1400.552983 Eb=-5.83  
Mg1 1.476119 -0.003192 -0.000628  
Mg2 8.131501 0.007000 0.000660  
Mg3 -4.224017 -1.164607 -1.335356  
Mg4 -4.221989 1.741117 -0.341727  
Mg5 -4.223007 -0.572264 1.677875  
Mg6 4.745777 -0.007900 -0.000542  
Mg7 -1.684386 -0.000154 -0.000282

@mg07-isomer16 bp86/6-31G(d) Etot=-1400.536001 Eb=-4.31  
Mg1 -3.648531 -0.194139 -0.009306  
Mg2 5.352656 -0.504393 1.630131  
Mg3 5.350623 -0.494051 -1.633826  
Mg4 -2.653447 2.885020 0.004181  
Mg5 -6.448204 -2.002857 0.000885  
Mg6 2.584657 -0.146571 0.001144  
Mg7 -0.537755 0.456991 0.006792

@mg07-isomer17 bp86/6-31G(d) Etot=-1400.535679 Eb=-4.28  
Mg1 -1.597525 -2.650084 0.000832  
Mg2 -0.000073 1.879883 -0.004007  
Mg3 -5.775874 1.417110 0.003243  
Mg4 5.775890 1.417082 0.004320  
Mg5 1.597637 -2.649990 -0.000104  
Mg6 -2.722847 0.292919 -0.001275  
Mg7 2.722792 0.293080 -0.003010

@mg07-isomer18 bp86/6-31G(d) Etot=-1400.535580 Eb=-4.27  
Mg1 6.001936 -1.255238 -1.035370  
Mg2 -6.002053 -1.255138 1.035370  
Mg3 0.000000 0.000269 0.000138  
Mg4 6.002703 1.255118 1.034853  
Mg5 -6.002586 1.255217 -1.034853  
Mg6 3.210340 0.000026 0.000688  
Mg7 -3.210340 -0.000255 -0.000826

@mg07-isomer19 bp86/6-31G(d) Etot=-1400.534056 Eb=-4.13  
Mg1 -4.503229 -1.593846 -0.002590  
Mg2 3.859949 -0.006218 0.001376  
Mg3 -1.384245 2.365060 0.001660  
Mg4 -1.393194 -2.366119 0.001631  
Mg5 7.233601 0.003965 -0.003728  
Mg6 -4.496649 1.601582 -0.002593  
Mg7 0.683767 -0.004424 0.004244

@mg07-isomer20 bp86/6-31G(d) Etot=-1400.533191 Eb=-4.06  
Mg1 -3.446168 -1.287146 0.000003  
Mg2 2.021932 -3.071906 -0.000002  
Mg3 2.545840 2.654353 0.000002  
Mg4 -3.154848 1.890433 -0.000001  
Mg5 -1.141117 -3.493869 -0.000001  
Mg6 3.662476 -0.334948 0.000001  
Mg7 -0.488115 3.643084 -0.000002

@mg07-isomer21 bp86/6-31G(d) Etot=-1400.528727 Eb=-3.66

|     |           |           |           |
|-----|-----------|-----------|-----------|
| Mg1 | -2.082392 | 1.593965  | -0.000572 |
| Mg2 | 3.901581  | -0.015120 | -0.001477 |
| Mg3 | -3.858355 | -4.411885 | 0.000781  |
| Mg4 | -3.826885 | 4.430105  | 0.000718  |
| Mg5 | 7.295055  | -0.001597 | 0.001200  |
| Mg6 | -2.093317 | -1.588565 | -0.000729 |
| Mg7 | 0.664313  | -0.006902 | 0.000080  |

@mg07-isomer22 bp86/6-31G(d) Etot=-1400.528069 Eb=-3.60

|     |           |           |           |
|-----|-----------|-----------|-----------|
| Mg1 | 1.584117  | 0.351333  | -0.007948 |
| Mg2 | -4.610737 | -0.809861 | -0.003730 |
| Mg3 | 7.987750  | -1.120032 | 0.000237  |
| Mg4 | -0.002128 | 3.150019  | 0.002133  |
| Mg5 | -7.987067 | -1.116922 | 0.003160  |
| Mg6 | 4.612216  | -0.803431 | 0.004597  |
| Mg7 | -1.584152 | 0.348894  | 0.001551  |

@mg08-isomer01 bp86/6-31G(d) Etot=-1600.675118 Eb=-9.21

|     |           |           |           |
|-----|-----------|-----------|-----------|
| Mg1 | -1.271712 | 2.686706  | -0.048605 |
| Mg2 | -1.255483 | 0.000031  | 1.574132  |
| Mg3 | 1.683922  | 1.587102  | 0.978671  |
| Mg4 | 1.684037  | -1.587015 | 0.978805  |
| Mg5 | 0.139175  | -0.000108 | -1.242876 |
| Mg6 | -1.271705 | -2.686728 | -0.048590 |
| Mg7 | -2.929237 | -0.000007 | -0.941145 |
| Mg8 | 3.221003  | 0.000019  | -1.250392 |

@mg08-isomer02 bp86/6-31G(d) Etot=-1600.674015 Eb=-9.13

|     |           |           |           |
|-----|-----------|-----------|-----------|
| Mg1 | -0.835019 | -1.692685 | -0.337508 |
| Mg2 | 2.005602  | 2.774632  | 0.088482  |
| Mg3 | 1.305141  | 0.000006  | 1.489236  |
| Mg4 | -0.835040 | 1.692668  | -0.337553 |
| Mg5 | -3.195103 | -0.000029 | -1.313195 |
| Mg6 | 2.010921  | 0.000008  | -1.400631 |
| Mg7 | -2.462141 | 0.000013  | 1.722691  |
| Mg8 | 2.005638  | -2.774614 | 0.088478  |

@mg08-isomer03 bp86/6-31G(d) Etot=-1600.670429 Eb=-8.85

|     |           |           |           |
|-----|-----------|-----------|-----------|
| Mg1 | 0.000017  | 1.789556  | 0.000035  |
| Mg2 | -1.786010 | -0.619094 | 1.506582  |
| Mg3 | -1.785986 | -0.619108 | -1.506576 |
| Mg4 | 1.785969  | -0.619137 | 1.506544  |
| Mg5 | 1.785989  | -0.619074 | -1.506623 |
| Mg6 | -3.017768 | 1.781269  | -0.000028 |
| Mg7 | -0.000005 | -2.875649 | 0.000022  |
| Mg8 | 3.017794  | 1.781236  | 0.000044  |

@mg08-isomer04 bp86/6-31G(d) Etot=-1600.669471 Eb=-8.77

|     |           |           |           |
|-----|-----------|-----------|-----------|
| Mg1 | 0.901899  | -0.481358 | 1.302324  |
| Mg2 | -1.740013 | 1.610775  | 0.739442  |
| Mg3 | 2.403968  | -1.309019 | -1.297740 |
| Mg4 | -0.901924 | -0.483618 | -1.301611 |
| Mg5 | -4.088202 | 0.179610  | -0.791916 |
| Mg6 | 1.740026  | 1.609556  | -0.742182 |
| Mg7 | 4.088162  | 0.180912  | 0.791730  |
| Mg8 | -2.403916 | -1.306858 | 1.299952  |

@mg08-isomer05 bp86/6-31G(d) Etot=-1600.669410 Eb=-8.77

|     |           |           |           |
|-----|-----------|-----------|-----------|
| Mg1 | -2.480301 | 0.000032  | 1.480200  |
| Mg2 | 0.736315  | -0.000005 | 1.616006  |
| Mg3 | -0.769978 | -2.451884 | 0.000113  |
| Mg4 | 2.514323  | 1.792989  | -0.000220 |
| Mg5 | 0.735859  | -0.000028 | -1.615881 |

|                              |                   |           |           |  |
|------------------------------|-------------------|-----------|-----------|--|
| Mg6                          | -0.770016         | 2.451842  | 0.000083  |  |
| Mg7                          | -2.480629         | -0.000049 | -1.480129 |  |
| Mg8                          | 2.514428          | -1.792897 | -0.000173 |  |
|                              |                   |           |           |  |
| @mg08-isomer06 bp86/6-31G(d) | Etot=-1600.667789 |           | Eb=-8.64  |  |
| Mg1                          | -3.511450         | -1.543603 | -0.425879 |  |
| Mg2                          | 1.226345          | -0.000040 | 1.473613  |  |
| Mg3                          | -2.105161         | -0.000069 | 1.808781  |  |
| Mg4                          | 2.167872          | -1.513974 | -1.005382 |  |
| Mg5                          | 4.384408          | -0.000014 | 0.581455  |  |
| Mg6                          | -0.818440         | 0.000030  | -1.001516 |  |
| Mg7                          | 2.167872          | 1.514029  | -1.005304 |  |
| Mg8                          | -3.511447         | 1.543640  | -0.425767 |  |
|                              |                   |           |           |  |
| @mg08-isomer07 bp86/6-31G(d) | Etot=-1600.665545 |           | Eb=-8.46  |  |
| Mg1                          | -1.153106         | -0.000057 | 1.154201  |  |
| Mg2                          | 1.153097          | -0.000119 | -1.154182 |  |
| Mg3                          | -3.754468         | -1.543348 | 0.309907  |  |
| Mg4                          | 2.092761          | -0.000122 | 1.747384  |  |
| Mg5                          | -3.754085         | 1.543666  | 0.309595  |  |
| Mg6                          | -2.092713         | -0.000259 | -1.747348 |  |
| Mg7                          | 3.754092          | 1.543631  | -0.309730 |  |
| Mg8                          | 3.754422          | -1.543393 | -0.309826 |  |
|                              |                   |           |           |  |
| @mg08-isomer08 bp86/6-31G(d) | Etot=-1600.661642 |           | Eb=-8.16  |  |
| Mg1                          | 0.729999          | -0.000005 | -1.445112 |  |
| Mg2                          | 3.065734          | 1.642216  | 0.000001  |  |
| Mg3                          | -0.098116         | 2.695867  | -0.000003 |  |
| Mg4                          | -2.070014         | 0.000000  | -0.000006 |  |
| Mg5                          | 0.729997          | 0.000000  | 1.445112  |  |
| Mg6                          | -5.325218         | 0.000001  | 0.000005  |  |
| Mg7                          | -0.098118         | -2.695864 | -0.000002 |  |
| Mg8                          | 3.065735          | -1.642214 | 0.000004  |  |
|                              |                   |           |           |  |
| @mg08-isomer09 bp86/6-31G(d) | Etot=-1600.659801 |           | Eb=-8.01  |  |
| Mg1                          | 0.546027          | 0.738920  | -0.929098 |  |
| Mg2                          | -0.897758         | -2.164213 | -0.626546 |  |
| Mg3                          | 2.490995          | -1.478446 | 0.296507  |  |
| Mg4                          | 2.760562          | 1.378702  | 1.383338  |  |
| Mg5                          | 3.627764          | 0.738509  | -1.529065 |  |
| Mg6                          | -5.660489         | 0.736984  | -0.177443 |  |
| Mg7                          | -0.391689         | -0.410037 | 1.846201  |  |
| Mg8                          | -2.475412         | 0.459581  | -0.263895 |  |
|                              |                   |           |           |  |
| @mg08-isomer10 bp86/6-31G(d) | Etot=-1600.659626 |           | Eb=-8.00  |  |
| Mg1                          | -4.086845         | 1.669431  | -0.642173 |  |
| Mg2                          | -4.087246         | -1.390821 | -1.124541 |  |
| Mg3                          | -4.086752         | -0.278422 | 1.766965  |  |
| Mg4                          | 4.087082          | 0.252912  | -1.770644 |  |
| Mg5                          | -1.560547         | -0.000169 | -0.000257 |  |
| Mg6                          | 4.086771          | 1.407142  | 1.104379  |  |
| Mg7                          | 1.560534          | -0.000141 | -0.000150 |  |
| Mg8                          | 4.087003          | -1.659932 | 0.666421  |  |
|                              |                   |           |           |  |
| @mg08-isomer11 bp86/6-31G(d) | Etot=-1600.657976 |           | Eb=-7.87  |  |
| Mg1                          | -5.691862         | 0.272659  | 0.000004  |  |
| Mg2                          | -2.451356         | 0.260019  | 0.000000  |  |
| Mg3                          | 0.048730          | -1.020013 | -1.443336 |  |
| Mg4                          | 2.916142          | -0.190270 | 0.000016  |  |
| Mg5                          | 3.045573          | 2.885487  | 0.000000  |  |
| Mg6                          | 0.110827          | 1.933259  | 0.000000  |  |
| Mg7                          | 1.973219          | -3.121103 | -0.000009 |  |
| Mg8                          | 0.048726          | -1.020039 | 1.443326  |  |

@mg08-isomer12 bp86/6-31G(d) Etot=-1600.657728 Eb=-7.85

|     |           |           |           |
|-----|-----------|-----------|-----------|
| Mg1 | 2.163295  | 0.000000  | 1.447246  |
| Mg2 | -0.290854 | 1.704426  | -0.000019 |
| Mg3 | -0.290840 | -1.704424 | -0.000002 |
| Mg4 | -2.833178 | -0.000010 | -0.000067 |
| Mg5 | 2.163264  | 0.000011  | -1.447237 |
| Mg6 | 2.585825  | -2.802917 | 0.000005  |
| Mg7 | -6.083313 | -0.000005 | 0.000054  |
| Mg8 | 2.585802  | 2.802920  | 0.000021  |

@mg08-isomer13 bp86/6-31G(d) Etot=-1600.656142 Eb=-7.73

|     |           |           |           |
|-----|-----------|-----------|-----------|
| Mg1 | -2.453530 | -0.000224 | -0.270342 |
| Mg2 | 0.503831  | -0.000037 | 1.306330  |
| Mg3 | 2.324694  | 2.847749  | 0.555833  |
| Mg4 | -0.051374 | 1.734546  | -1.097401 |
| Mg5 | 2.324724  | -2.847714 | 0.555895  |
| Mg6 | 3.019537  | 0.000012  | -0.434496 |
| Mg7 | -5.616872 | -0.000014 | 0.481816  |
| Mg8 | -0.051010 | -1.734318 | -1.097635 |

@mg08-isomer14 bp86/6-31G(d) Etot=-1600.651542 Eb=-7.36

|     |           |           |           |
|-----|-----------|-----------|-----------|
| Mg1 | -0.291164 | 0.639028  | -0.000020 |
| Mg2 | -2.086562 | -1.632977 | 1.466701  |
| Mg3 | -2.086606 | -1.633000 | -1.466665 |
| Mg4 | -1.502244 | 3.481936  | -0.000007 |
| Mg5 | 2.721894  | 0.151291  | -0.000022 |
| Mg6 | 5.966429  | 0.434742  | 0.000019  |
| Mg7 | -3.389140 | 0.848479  | 0.000014  |
| Mg8 | 0.667393  | -2.289500 | -0.000019 |

@mg08-isomer15 bp86/6-31G(d) Etot=-1600.644026 Eb=-6.77

|     |           |           |           |
|-----|-----------|-----------|-----------|
| Mg1 | -0.000328 | 0.252219  | 1.457256  |
| Mg2 | 2.814571  | -0.508504 | 0.000872  |
| Mg3 | 0.000287  | 0.251893  | -1.457112 |
| Mg4 | -2.814642 | -0.508378 | -0.000475 |
| Mg5 | 5.618652  | -2.207777 | -0.000519 |
| Mg6 | 1.831669  | 2.464161  | 0.000303  |
| Mg7 | -5.618604 | -2.207851 | 0.000299  |
| Mg8 | -1.831604 | 2.464237  | -0.000625 |

@mg08-isomer16 bp86/6-31G(d) Etot=-1600.643629 Eb=-6.74

|     |           |           |           |
|-----|-----------|-----------|-----------|
| Mg1 | 0.095982  | -0.754919 | -0.000041 |
| Mg2 | -5.916172 | -1.915513 | 0.000065  |
| Mg3 | 1.755302  | 2.009826  | 0.000084  |
| Mg4 | -1.262344 | 1.669865  | -1.481124 |
| Mg5 | 3.221221  | -0.759025 | 0.000025  |
| Mg6 | 6.396167  | -1.479237 | -0.000014 |
| Mg7 | -3.027709 | -0.440747 | -0.000139 |
| Mg8 | -1.262447 | 1.669750  | 1.481143  |

@mg08-isomer17 bp86/6-31G(d) Etot=-1600.642793 Eb=-6.68

|     |           |           |           |
|-----|-----------|-----------|-----------|
| Mg1 | -1.749722 | -0.303445 | 1.459814  |
| Mg2 | 7.618928  | -0.466356 | -0.000036 |
| Mg3 | -1.749665 | -0.303502 | -1.459777 |
| Mg4 | 1.094486  | 0.199545  | 0.000074  |
| Mg5 | -4.424294 | 0.830087  | -0.000066 |
| Mg6 | -3.957836 | -2.300524 | 0.000001  |
| Mg7 | -1.101507 | 2.451740  | -0.000019 |
| Mg8 | 4.269609  | -0.107546 | 0.000009  |

@mg08-isomer18 bp86/6-31G(d) Etot=-1600.642410 Eb=-6.65

|     |           |           |           |
|-----|-----------|-----------|-----------|
| Mg1 | 1.236852  | 1.536460  | -1.482454 |
| Mg2 | -1.150877 | 0.136258  | 0.000784  |
| Mg3 | 1.688096  | -1.178997 | 0.000509  |

|     |           |           |           |
|-----|-----------|-----------|-----------|
| Mg4 | -4.297423 | -0.137495 | 0.001700  |
| Mg5 | 1.237662  | 1.537538  | 1.481612  |
| Mg6 | 4.216815  | 0.905851  | -0.000667 |
| Mg7 | -7.621775 | -0.573818 | -0.001378 |
| Mg8 | 4.690649  | -2.225799 | -0.000106 |

@mg08-isomer19 bp86/6-31G(d) Etot=-1600.641804 Eb=-6.60

|     |           |           |           |
|-----|-----------|-----------|-----------|
| Mg1 | -2.895550 | 0.657784  | 1.605258  |
| Mg2 | 3.010238  | -0.000703 | 0.000927  |
| Mg3 | -0.152191 | -0.004321 | -0.001315 |
| Mg4 | -2.900090 | -1.720472 | -0.233265 |
| Mg5 | 5.800714  | 1.628794  | -0.000082 |
| Mg6 | -2.896296 | 1.061807  | -1.372392 |
| Mg7 | -5.769861 | 0.003335  | 0.000933  |
| Mg8 | 5.803036  | -1.626224 | -0.000063 |

@mg08-isomer20 bp86/6-31G(d) Etot=-1600.641643 Eb=-6.59

|     |           |           |           |
|-----|-----------|-----------|-----------|
| Mg1 | 1.455638  | -0.346871 | -0.000013 |
| Mg2 | -1.561187 | -1.137271 | -0.000009 |
| Mg3 | -3.545080 | 0.811031  | -1.486296 |
| Mg4 | 4.624575  | -0.176919 | 0.000001  |
| Mg5 | -4.686731 | -1.723326 | 0.000001  |
| Mg6 | 7.981261  | -0.172779 | 0.000005  |
| Mg7 | -3.545066 | 0.811016  | 1.486313  |
| Mg8 | -0.723411 | 1.935118  | -0.000002 |

@mg08-isomer21 bp86/6-31G(d) Etot=-1600.637626 Eb=-6.27

|     |           |           |           |
|-----|-----------|-----------|-----------|
| Mg1 | 2.462718  | -1.999753 | 1.636438  |
| Mg2 | 3.207103  | 0.481530  | -0.025079 |
| Mg3 | 0.295308  | -0.520582 | 0.021570  |
| Mg4 | -2.780182 | 0.112726  | -0.010630 |
| Mg5 | -5.490938 | 0.792278  | 1.612174  |
| Mg6 | 2.466753  | -2.154543 | -1.430984 |
| Mg7 | 5.386633  | 2.904187  | -0.147065 |
| Mg8 | -5.547395 | 0.384157  | -1.656424 |

@mg08-isomer22 bp86/6-31G(d) Etot=-1600.636667 Eb=-6.20

|     |           |           |           |
|-----|-----------|-----------|-----------|
| Mg1 | -4.363107 | -1.160937 | -1.611244 |
| Mg2 | -2.018607 | 0.061219  | 0.003587  |
| Mg3 | 1.089460  | 0.468222  | 0.002967  |
| Mg4 | 3.228929  | 2.885556  | -0.000917 |
| Mg5 | -4.840122 | 1.322229  | 0.150389  |
| Mg6 | 4.176897  | -0.237997 | -0.000857 |
| Mg7 | -4.320091 | -1.420681 | 1.456182  |
| Mg8 | 7.046642  | -1.917610 | -0.000106 |

@mg08-isomer23 bp86/6-31G(d) Etot=-1600.635252 Eb=-6.09

|     |           |           |           |
|-----|-----------|-----------|-----------|
| Mg1 | -1.150213 | -0.079189 | 1.726172  |
| Mg2 | -3.966681 | -0.000054 | -0.000400 |
| Mg3 | -1.150005 | 1.534223  | -0.795003 |
| Mg4 | -7.282369 | 0.000761  | 0.000670  |
| Mg5 | 1.627561  | -0.000495 | 0.000019  |
| Mg6 | -1.150219 | -1.455917 | -0.931649 |
| Mg7 | 4.844538  | 0.000215  | -0.000385 |
| Mg8 | 8.227388  | 0.000455  | 0.000576  |

@mg08-isomer24 bp86/6-31G(d) Etot=-1600.630553 Eb=-5.72

|     |           |           |           |
|-----|-----------|-----------|-----------|
| Mg1 | 8.855230  | 0.688725  | 0.000132  |
| Mg2 | -5.768689 | 3.130276  | 0.000067  |
| Mg3 | -3.733828 | 0.579871  | -0.000091 |
| Mg4 | -3.116312 | -2.004389 | -1.528425 |
| Mg5 | -0.867217 | -0.552401 | -0.000059 |
| Mg6 | 2.248212  | -0.081982 | -0.002104 |
| Mg7 | 5.498747  | 0.243549  | 0.001127  |

|                                                          |           |           |           |  |
|----------------------------------------------------------|-----------|-----------|-----------|--|
| Mg8                                                      | -3.116144 | -2.003648 | 1.529353  |  |
| @mg08-isomer25 bp86/6-31G(d) Etot=-1600.628965 Eb=-5.59  |           |           |           |  |
| Mg1                                                      | 5.627984  | -1.577157 | -0.675623 |  |
| Mg2                                                      | -0.104259 | -0.060782 | -0.000086 |  |
| Mg3                                                      | -9.786148 | 0.459965  | -0.000570 |  |
| Mg4                                                      | 5.574286  | 0.293376  | 1.755966  |  |
| Mg5                                                      | -6.560760 | -0.555425 | 0.000395  |  |
| Mg6                                                      | 5.541657  | 1.463059  | -1.080099 |  |
| Mg7                                                      | 3.041115  | -0.014553 | -0.000511 |  |
| Mg8                                                      | -3.333875 | -0.008482 | 0.000528  |  |
| @mg09-isomer01 bp86/6-31G(d) Etot=-1800.784275 Eb=-10.94 |           |           |           |  |
| Mg1                                                      | 1.764832  | 0.562731  | -1.576453 |  |
| Mg2                                                      | 2.242046  | -2.041018 | -0.000018 |  |
| Mg3                                                      | -0.395129 | -1.809835 | 1.576582  |  |
| Mg4                                                      | -0.395059 | -1.809809 | -1.576530 |  |
| Mg5                                                      | -1.369804 | 1.246990  | 1.576552  |  |
| Mg6                                                      | -2.888661 | -0.921045 | -0.000029 |  |
| Mg7                                                      | 0.646583  | 2.962175  | 0.000036  |  |
| Mg8                                                      | 1.764980  | 0.562766  | 1.576390  |  |
| Mg9                                                      | -1.369788 | 1.247045  | -1.576528 |  |
| @mg09-isomer02 bp86/6-31G(d) Etot=-1800.774042 Eb=-10.23 |           |           |           |  |
| Mg1                                                      | -2.086162 | -0.372009 | -1.558801 |  |
| Mg2                                                      | 1.103298  | 2.686537  | 1.149008  |  |
| Mg3                                                      | 2.807929  | -1.869686 | -1.087184 |  |
| Mg4                                                      | -1.103841 | 2.686365  | -1.149022 |  |
| Mg5                                                      | 2.086304  | -0.371641 | 1.558887  |  |
| Mg6                                                      | -1.164214 | 0.667014  | 1.260887  |  |
| Mg7                                                      | -2.807502 | -1.870360 | 1.087099  |  |
| Mg8                                                      | 0.000249  | -2.223403 | -0.000026 |  |
| Mg9                                                      | 1.163939  | 0.667184  | -1.260847 |  |
| @mg09-isomer03 bp86/6-31G(d) Etot=-1800.770778 Eb=-10.00 |           |           |           |  |
| Mg1                                                      | 0.041255  | -2.002166 | -0.775043 |  |
| Mg2                                                      | -0.071726 | 3.491180  | -0.944351 |  |
| Mg3                                                      | -1.755188 | 0.965757  | -0.775556 |  |
| Mg4                                                      | 1.714082  | 1.037117  | -0.774891 |  |
| Mg5                                                      | -2.987445 | -1.808030 | -0.944650 |  |
| Mg6                                                      | 3.059348  | -1.683517 | -0.944694 |  |
| Mg7                                                      | -1.634208 | -0.988490 | 1.719777  |  |
| Mg8                                                      | 1.673282  | -0.920781 | 1.719677  |  |
| Mg9                                                      | -0.039400 | 1.908931  | 1.719732  |  |
| @mg09-isomer04 bp86/6-31G(d) Etot=-1800.769753 Eb=-9.93  |           |           |           |  |
| Mg1                                                      | 1.619828  | 0.000456  | -1.532787 |  |
| Mg2                                                      | 2.135839  | 2.707541  | 0.000685  |  |
| Mg3                                                      | 2.136092  | -2.707394 | -0.000760 |  |
| Mg4                                                      | -0.738975 | -1.720927 | -0.000478 |  |
| Mg5                                                      | -3.177122 | -0.000146 | 0.000062  |  |
| Mg6                                                      | -1.428160 | -0.000813 | 2.647748  |  |
| Mg7                                                      | 1.619872  | -0.000372 | 1.532847  |  |
| Mg8                                                      | -1.428216 | 0.000785  | -2.647762 |  |
| Mg9                                                      | -0.739158 | 1.720869  | 0.000445  |  |
| @mg09-isomer05 bp86/6-31G(d) Etot=-1800.762794 Eb=-9.44  |           |           |           |  |
| Mg1                                                      | 0.652368  | -0.000027 | 1.284836  |  |
| Mg2                                                      | 1.503369  | 0.000005  | -1.604377 |  |
| Mg3                                                      | 1.774078  | 2.659463  | -0.017188 |  |
| Mg4                                                      | 3.754988  | 0.000051  | 0.432312  |  |
| Mg5                                                      | -2.606637 | 0.000010  | 1.811659  |  |
| Mg6                                                      | 1.774184  | -2.659459 | -0.017174 |  |
| Mg7                                                      | -1.324208 | 1.571598  | -0.557684 |  |

|                                                         |           |           |           |  |
|---------------------------------------------------------|-----------|-----------|-----------|--|
| Mg8                                                     | -1.324182 | -1.571604 | -0.557688 |  |
| Mg9                                                     | -4.203960 | -0.000036 | -0.774695 |  |
| @mg09-isomer06 bp86/6-31G(d) Etot=-1800.761993 Eb=-9.39 |           |           |           |  |
| Mg1                                                     | -0.000111 | 2.976732  | -0.000013 |  |
| Mg2                                                     | -0.915529 | 0.181867  | -1.292138 |  |
| Mg3                                                     | 2.276558  | 0.949781  | -1.313390 |  |
| Mg4                                                     | -1.533429 | -2.061357 | 0.686847  |  |
| Mg5                                                     | 1.533359  | -2.061214 | -0.686884 |  |
| Mg6                                                     | 0.915669  | 0.182044  | 1.292259  |  |
| Mg7                                                     | 4.047896  | -0.558798 | 0.706528  |  |
| Mg8                                                     | -2.276586 | 0.949606  | 1.313455  |  |
| Mg9                                                     | -4.047828 | -0.558661 | -0.706663 |  |
| @mg09-isomer07 bp86/6-31G(d) Etot=-1800.758576 Eb=-9.15 |           |           |           |  |
| Mg1                                                     | 0.536351  | 0.657082  | -0.000667 |  |
| Mg2                                                     | 3.271268  | 2.257094  | 0.000027  |  |
| Mg3                                                     | 3.060391  | -0.472858 | -1.486161 |  |
| Mg4                                                     | 1.116195  | -2.592427 | -0.000056 |  |
| Mg5                                                     | 3.059276  | -0.472476 | 1.486822  |  |
| Mg6                                                     | -1.779130 | -1.543654 | 0.000407  |  |
| Mg7                                                     | -2.301780 | 1.144933  | -1.506047 |  |
| Mg8                                                     | -4.661323 | -0.123655 | 0.000408  |  |
| Mg9                                                     | -2.301249 | 1.145961  | 1.505268  |  |
| @mg09-isomer08 bp86/6-31G(d) Etot=-1800.758383 Eb=-9.14 |           |           |           |  |
| Mg1                                                     | 0.662260  | 0.764454  | -0.747617 |  |
| Mg2                                                     | -2.327435 | 2.053495  | -0.434854 |  |
| Mg3                                                     | 3.415671  | 2.077458  | 0.009686  |  |
| Mg4                                                     | -4.479243 | 0.012701  | 0.398895  |  |
| Mg5                                                     | 3.384272  | -0.908425 | -0.962416 |  |
| Mg6                                                     | 2.205323  | -0.297405 | 1.701935  |  |
| Mg7                                                     | 0.561584  | -2.466326 | -0.077714 |  |
| Mg8                                                     | -2.058408 | -0.955522 | -1.349366 |  |
| Mg9                                                     | -1.364024 | -0.280430 | 1.461451  |  |
| @mg09-isomer09 bp86/6-31G(d) Etot=-1800.758190 Eb=-9.12 |           |           |           |  |
| Mg1                                                     | 0.165763  | 1.632915  | 0.001239  |  |
| Mg2                                                     | -2.381329 | 0.000362  | 1.457658  |  |
| Mg3                                                     | 2.319605  | -0.000837 | 1.509800  |  |
| Mg4                                                     | 2.318138  | -0.000907 | -1.509621 |  |
| Mg5                                                     | 5.127574  | 0.000438  | -0.000797 |  |
| Mg6                                                     | 0.164722  | -1.633372 | 0.001332  |  |
| Mg7                                                     | -2.667088 | 2.786173  | -0.000559 |  |
| Mg8                                                     | -2.378623 | 0.000376  | -1.458468 |  |
| Mg9                                                     | -2.668762 | -2.785148 | -0.000584 |  |
| @mg09-isomer10 bp86/6-31G(d) Etot=-1800.757765 Eb=-9.09 |           |           |           |  |
| Mg1                                                     | 1.718729  | -0.385136 | 1.504158  |  |
| Mg2                                                     | 0.546306  | 1.880533  | -0.336962 |  |
| Mg3                                                     | -0.940403 | -1.167216 | -0.395753 |  |
| Mg4                                                     | 3.645258  | 1.793100  | 0.247902  |  |
| Mg5                                                     | -1.892524 | 0.977450  | 1.551598  |  |
| Mg6                                                     | 1.258706  | -3.268093 | 0.008733  |  |
| Mg7                                                     | -4.379236 | -0.560867 | 0.193639  |  |
| Mg8                                                     | -2.394415 | 1.298038  | -1.419004 |  |
| Mg9                                                     | 2.437579  | -0.567809 | -1.354311 |  |
| @mg09-isomer11 bp86/6-31G(d) Etot=-1800.757748 Eb=-9.09 |           |           |           |  |
| Mg1                                                     | 1.338660  | -3.265778 | -0.000015 |  |
| Mg2                                                     | 0.493016  | 1.863347  | -0.000081 |  |
| Mg3                                                     | 2.147326  | -0.465642 | -1.470287 |  |
| Mg4                                                     | -2.209095 | 1.113000  | -1.515831 |  |
| Mg5                                                     | 3.634794  | 1.859510  | 0.000027  |  |

|     |           |           |          |
|-----|-----------|-----------|----------|
| Mg6 | 2.147238  | -0.465581 | 1.470335 |
| Mg7 | -4.441273 | -0.574003 | 0.000012 |
| Mg8 | -0.901584 | -1.177885 | 0.000029 |
| Mg9 | -2.209081 | 1.113032  | 1.515811 |

@mg09-isomer12 bp86/6-31G(d) Etot=-1800.757416 Eb=-9.07

|     |           |           |           |
|-----|-----------|-----------|-----------|
| Mg1 | 0.914554  | 1.069409  | -1.264282 |
| Mg2 | -1.743212 | -1.223903 | -0.619673 |
| Mg3 | -2.301039 | 1.632222  | -1.415849 |
| Mg4 | 2.301210  | 1.632049  | 1.416001  |
| Mg5 | -0.914526 | 1.069323  | 1.264405  |
| Mg6 | 1.743250  | -1.224019 | 0.619539  |
| Mg7 | 4.095870  | 0.401675  | -0.776960 |
| Mg8 | -0.000119 | -3.758465 | 0.000021  |
| Mg9 | -4.095988 | 0.401709  | 0.776799  |

@mg09-isomer13 bp86/6-31G(d) Etot=-1800.754982 Eb=-8.90

|     |           |           |           |
|-----|-----------|-----------|-----------|
| Mg1 | -0.000064 | 2.046203  | 0.000147  |
| Mg2 | 2.045466  | 0.030085  | 1.691369  |
| Mg3 | -2.045672 | 0.030238  | -1.691508 |
| Mg4 | 1.221183  | -0.696829 | -1.112341 |
| Mg5 | 3.546111  | 1.372726  | -0.571163 |
| Mg6 | -4.086107 | -1.728895 | 0.018673  |
| Mg7 | -3.545793 | 1.372733  | 0.571377  |
| Mg8 | -1.221034 | -0.697205 | 1.112046  |
| Mg9 | 4.085910  | -1.729056 | -0.018600 |

@mg09-isomer14 bp86/6-31G(d) Etot=-1800.754898 Eb=-8.89

|     |           |           |           |
|-----|-----------|-----------|-----------|
| Mg1 | 0.637402  | 0.000018  | -1.210041 |
| Mg2 | 2.488901  | -1.578713 | 0.798425  |
| Mg3 | -2.340541 | 0.000258  | -0.462971 |
| Mg4 | -0.571971 | -2.676688 | 0.162131  |
| Mg5 | 2.489206  | 1.578474  | 0.798316  |
| Mg6 | -5.512270 | -0.000164 | -0.427070 |
| Mg7 | 3.707516  | -0.000335 | -1.585658 |
| Mg8 | -0.571499 | 2.676974  | 0.161961  |
| Mg9 | -0.326743 | 0.000176  | 1.764907  |

@mg09-isomer15 bp86/6-31G(d) Etot=-1800.754427 Eb=-8.86

|     |           |           |           |
|-----|-----------|-----------|-----------|
| Mg1 | 0.711604  | 0.823747  | -0.001704 |
| Mg2 | -1.464689 | -1.410826 | -0.000875 |
| Mg3 | -2.176005 | 1.220279  | -1.517618 |
| Mg4 | 1.316590  | -1.933263 | 1.501191  |
| Mg5 | 1.317514  | -1.936571 | -1.499322 |
| Mg6 | -2.174402 | 1.219337  | 1.517724  |
| Mg7 | 3.326299  | 2.647271  | 0.000061  |
| Mg8 | 3.647489  | -0.477489 | -0.000136 |
| Mg9 | -4.504400 | -0.152485 | 0.000678  |

@mg09-isomer16 bp86/6-31G(d) Etot=-1800.753438 Eb=-8.79

|     |           |           |           |
|-----|-----------|-----------|-----------|
| Mg1 | 2.263321  | -0.000117 | 1.280086  |
| Mg2 | -1.213147 | 0.000744  | 2.262996  |
| Mg3 | -0.172833 | -1.657795 | -0.178482 |
| Mg4 | 2.693836  | 2.774445  | -0.204268 |
| Mg5 | 2.692615  | -2.775286 | -0.203646 |
| Mg6 | -2.711549 | 0.000742  | -0.428456 |
| Mg7 | 2.511719  | -0.000545 | -1.680043 |
| Mg8 | -0.172112 | 1.658203  | -0.178944 |
| Mg9 | -5.891851 | -0.000390 | -0.669243 |

@mg09-isomer17 bp86/6-31G(d) Etot=-1800.753114 Eb=-8.77

|     |           |           |           |
|-----|-----------|-----------|-----------|
| Mg1 | -0.849769 | -2.596004 | 0.883975  |
| Mg2 | 0.103573  | -1.168168 | -1.593541 |
| Mg3 | -2.275243 | 0.186392  | -0.121375 |



|     |           |           |           |
|-----|-----------|-----------|-----------|
| Mg4 | 2.335686  | -2.543240 | 0.162190  |
| Mg5 | 0.635948  | 0.079798  | 1.220848  |
| Mg6 | 2.972874  | 0.495121  | -0.863436 |
| Mg7 | 0.263177  | 2.144102  | -1.070571 |
| Mg8 | 2.292460  | 2.680534  | 1.274527  |
| Mg9 | -5.478707 | 0.721464  | 0.107383  |

@mg09-isomer18 bp86/6-31G(d) Etot=-1800.752934 Eb=-8.76

|     |           |           |           |
|-----|-----------|-----------|-----------|
| Mg1 | 0.220719  | -1.690311 | 0.436691  |
| Mg2 | 2.519562  | 0.808364  | 0.232728  |
| Mg3 | 2.459198  | -1.584556 | -1.754481 |
| Mg4 | -0.693190 | 1.450261  | 1.455521  |
| Mg5 | -2.613873 | -0.605964 | 0.109159  |
| Mg6 | -5.819384 | -0.774029 | -0.123147 |
| Mg7 | 3.165097  | -1.997141 | 1.245717  |
| Mg8 | 1.074815  | 3.492067  | -0.169130 |
| Mg9 | -0.312944 | 0.901311  | -1.433058 |

@mg09-isomer19 bp86/6-31G(d) Etot=-1800.751812 Eb=-8.68

|     |           |           |           |
|-----|-----------|-----------|-----------|
| Mg1 | -1.605489 | -1.359008 | 0.000118  |
| Mg2 | -0.000012 | 1.448747  | 0.000092  |
| Mg3 | -2.963201 | 0.960608  | 1.498900  |
| Mg4 | 1.605454  | -1.358972 | 0.000670  |
| Mg5 | 4.781869  | -1.286455 | 0.000004  |
| Mg6 | 2.962815  | 0.960038  | -1.499320 |
| Mg7 | -4.781883 | -1.286429 | -0.000046 |
| Mg8 | 2.963476  | 0.961014  | 1.498587  |
| Mg9 | -2.963029 | 0.960457  | -1.499007 |

@mg09-isomer20 bp86/6-31G(d) Etot=-1800.750247 Eb=-8.57

|     |           |           |           |
|-----|-----------|-----------|-----------|
| Mg1 | 1.783304  | -2.741444 | 0.000062  |
| Mg2 | -0.697243 | -1.260117 | 1.500942  |
| Mg3 | 2.644696  | -0.016219 | -1.498146 |
| Mg4 | -5.903373 | 0.561306  | 0.000080  |
| Mg5 | 2.644663  | -0.016086 | 1.498289  |
| Mg6 | 2.885662  | 2.677853  | -0.000093 |
| Mg7 | -0.697143 | -1.260151 | -1.501039 |
| Mg8 | -2.729216 | 0.478114  | -0.000140 |
| Mg9 | 0.068651  | 1.576744  | 0.000045  |

@mg09-isomer21 bp86/6-31G(d) Etot=-1800.749330 Eb=-8.50

|     |           |           |           |
|-----|-----------|-----------|-----------|
| Mg1 | -3.185607 | 0.915739  | 1.495772  |
| Mg2 | -1.584005 | -1.226695 | -0.000561 |
| Mg3 | -3.186150 | 0.916574  | -1.495160 |
| Mg4 | 2.918245  | 1.655091  | 0.001243  |
| Mg5 | -0.337658 | 1.762909  | 0.000051  |
| Mg6 | 1.601072  | -1.099984 | -0.000495 |
| Mg7 | 4.262799  | -0.690645 | -1.538459 |
| Mg8 | 4.263049  | -0.692819 | 1.537683  |
| Mg9 | -4.751746 | -1.540170 | -0.000075 |

@mg09-isomer22 bp86/6-31G(d) Etot=-1800.748505 Eb=-8.45

|     |           |           |           |
|-----|-----------|-----------|-----------|
| Mg1 | 1.108611  | 1.717068  | 1.504900  |
| Mg2 | -1.879682 | 1.262397  | 0.000000  |
| Mg3 | 3.381966  | 0.323162  | -0.000013 |
| Mg4 | 0.375551  | -0.887568 | -0.000040 |
| Mg5 | 1.108611  | 1.717142  | -1.504853 |
| Mg6 | -2.601815 | -1.323628 | 1.513026  |
| Mg7 | -4.928616 | 0.010630  | 0.000018  |
| Mg8 | 6.037219  | -1.495587 | 0.000002  |
| Mg9 | -2.601845 | -1.323617 | -1.513040 |

@mg09-isomer23 bp86/6-31G(d) Etot=-1800.739871 Eb=-7.84

|     |           |           |           |
|-----|-----------|-----------|-----------|
| Mg1 | -0.000005 | -0.377244 | -1.440649 |
|-----|-----------|-----------|-----------|

|     |           |           |           |
|-----|-----------|-----------|-----------|
| Mg2 | -1.665207 | -2.677359 | -0.000017 |
| Mg3 | -0.000021 | -0.377242 | 1.440679  |
| Mg4 | 2.691506  | 0.449114  | 0.000020  |
| Mg5 | -2.691512 | 0.449109  | 0.000001  |
| Mg6 | -5.798961 | 1.392454  | -0.000018 |
| Mg7 | 5.798958  | 1.392452  | -0.000029 |
| Mg8 | 0.000011  | 2.426054  | 0.000011  |
| Mg9 | 1.665231  | -2.677339 | 0.000003  |

@mg09-isomer24 bp86/6-31G(d) Etot=-1800.739090 Eb=-7.79

|     |           |           |           |
|-----|-----------|-----------|-----------|
| Mg1 | -1.734674 | 0.956177  | -2.094039 |
| Mg2 | 3.107643  | -0.694858 | -0.098432 |
| Mg3 | -6.151258 | -1.642300 | 0.336541  |
| Mg4 | -1.500846 | 1.806926  | 0.836088  |
| Mg5 | 1.500295  | 1.806010  | -0.839150 |
| Mg6 | 0.000335  | -0.853009 | 0.001119  |
| Mg7 | 1.734486  | 0.961179  | 2.092612  |
| Mg8 | -3.107012 | -0.696205 | 0.100274  |
| Mg9 | 6.151031  | -1.643920 | -0.335013 |

@mg09-isomer25 bp86/6-31G(d) Etot=-1800.738193 Eb=-7.73

|     |           |           |           |
|-----|-----------|-----------|-----------|
| Mg1 | -1.662087 | 0.000000  | 1.441855  |
| Mg2 | -0.854868 | -2.695072 | 0.000057  |
| Mg3 | -1.661927 | -0.000010 | -1.441827 |
| Mg4 | -0.856725 | 2.695588  | 0.000053  |
| Mg5 | 1.128796  | 0.000953  | 0.000163  |
| Mg6 | -4.017739 | 1.630699  | -0.000120 |
| Mg7 | 4.290896  | 0.000655  | 0.000082  |
| Mg8 | -4.016562 | -1.632382 | -0.000117 |
| Mg9 | 7.650216  | -0.000431 | -0.000146 |

@mg09-isomer26 bp86/6-31G(d) Etot=-1800.736913 Eb=-7.64

|     |           |           |           |
|-----|-----------|-----------|-----------|
| Mg1 | -0.676038 | 0.654462  | 1.827452  |
| Mg2 | 1.531368  | -0.154281 | -0.169319 |
| Mg3 | -1.429558 | -0.789288 | -0.851017 |
| Mg4 | -3.656725 | -1.434185 | 1.455960  |
| Mg5 | -3.599135 | 1.337878  | 0.152902  |
| Mg6 | -0.290716 | 2.251103  | -0.762410 |
| Mg7 | 4.641338  | -0.296671 | -0.092752 |
| Mg8 | 7.969291  | -0.472913 | -0.051885 |
| Mg9 | -4.489825 | -1.096104 | -1.508930 |

@mg09-isomer27 bp86/6-31G(d) Etot=-1800.736492 Eb=-7.61

|     |           |           |           |
|-----|-----------|-----------|-----------|
| Mg1 | 1.757245  | 1.956936  | -0.000027 |
| Mg2 | 2.774094  | -0.925698 | 0.000272  |
| Mg3 | -1.757439 | 1.956641  | 0.000047  |
| Mg4 | 0.000096  | -0.431593 | -1.437122 |
| Mg5 | -2.773777 | -0.926199 | 0.000362  |
| Mg6 | 5.389423  | -2.839188 | -0.000376 |
| Mg7 | -0.000314 | 4.479614  | -0.000433 |
| Mg8 | -5.389455 | -2.839221 | -0.000439 |
| Mg9 | 0.000127  | -0.431293 | 1.437716  |

@mg09-isomer28 bp86/6-31G(d) Etot=-1800.736289 Eb=-7.59

|     |           |           |           |
|-----|-----------|-----------|-----------|
| Mg1 | -1.673319 | 1.769658  | 0.000085  |
| Mg2 | -3.272179 | -0.830136 | 0.000067  |
| Mg3 | 1.264669  | 1.208105  | 1.441343  |
| Mg4 | -0.258023 | -1.339229 | 0.000155  |
| Mg5 | 2.791648  | -1.146782 | -0.000014 |
| Mg6 | 5.634836  | -2.696033 | -0.000053 |
| Mg7 | 0.498213  | 3.949485  | -0.000099 |
| Mg8 | -6.250295 | -2.123017 | -0.000087 |
| Mg9 | 1.264449  | 1.207949  | -1.441397 |

@mg09-isomer29 bp86/6-31G(d) Etot=-1800.734760 Eb=-7.49

|     |           |           |           |
|-----|-----------|-----------|-----------|
| Mg1 | -1.064079 | -1.026991 | -1.440102 |
| Mg2 | 1.473177  | 0.166938  | -0.000433 |
| Mg3 | 4.623671  | 0.104913  | -0.000167 |
| Mg4 | -3.054224 | -3.074301 | 0.000156  |
| Mg5 | -1.036121 | 1.913492  | -0.000196 |
| Mg6 | -1.063767 | -1.026930 | 1.439925  |
| Mg7 | 7.972424  | 0.107106  | 0.000358  |
| Mg8 | -3.910845 | -0.118972 | 0.000236  |
| Mg9 | -3.940236 | 2.954745  | 0.000224  |

@mg09-isomer30 bp86/6-31G(d) Etot=-1800.734463 Eb=-7.47

|     |           |           |           |
|-----|-----------|-----------|-----------|
| Mg1 | -0.736733 | 1.681921  | -0.000059 |
| Mg2 | -3.212671 | 0.000160  | 1.445892  |
| Mg3 | 1.813245  | -0.000433 | -0.000030 |
| Mg4 | 4.973734  | -0.000320 | 0.000035  |
| Mg5 | 8.321828  | 0.000260  | -0.000002 |
| Mg6 | -3.605107 | -2.805093 | -0.000006 |
| Mg7 | -0.737134 | -1.682190 | -0.000031 |
| Mg8 | -3.604408 | 2.805531  | 0.000013  |
| Mg9 | -3.212754 | 0.000164  | -1.445812 |

@mg09-isomer31 bp86/6-31G(d) Etot=-1800.732834 Eb=-7.35

|     |           |           |           |
|-----|-----------|-----------|-----------|
| Mg1 | 1.000969  | -1.715967 | 1.152758  |
| Mg2 | 4.038620  | 0.000048  | 0.241401  |
| Mg3 | -1.452563 | -0.000095 | 0.470675  |
| Mg4 | -4.574145 | -0.000031 | -0.021463 |
| Mg5 | -7.902394 | 0.000010  | -0.416167 |
| Mg6 | 1.378931  | 0.000022  | -1.285630 |
| Mg7 | 3.254800  | 2.853243  | -0.647161 |
| Mg8 | 3.254944  | -2.853171 | -0.647195 |
| Mg9 | 1.000838  | 1.715943  | 1.152783  |

@mg09-isomer32 bp86/6-31G(d) Etot=-1800.729710 Eb=-7.14

|     |           |           |           |
|-----|-----------|-----------|-----------|
| Mg1 | 0.584314  | -1.920955 | 0.977258  |
| Mg2 | 0.417134  | 0.921830  | -0.174192 |
| Mg3 | -2.266049 | -0.965555 | -0.092268 |
| Mg4 | -1.275709 | 0.203795  | 2.418095  |
| Mg5 | 0.064446  | 3.868711  | -1.028290 |
| Mg6 | 3.133960  | -0.460926 | -0.234872 |
| Mg7 | -4.578562 | -2.697176 | -1.558988 |
| Mg8 | 6.302594  | -1.133277 | -0.539906 |
| Mg9 | -2.382128 | 2.183553  | 0.233165  |

@mg09-isomer33 bp86/6-31G(d) Etot=-1800.726133 Eb=-6.89

|     |           |           |           |
|-----|-----------|-----------|-----------|
| Mg1 | 2.346392  | 1.152477  | 0.000095  |
| Mg2 | 2.003568  | -1.578904 | -1.484238 |
| Mg3 | -0.444695 | -0.275831 | -0.000179 |
| Mg4 | 4.925872  | -0.824941 | -0.000006 |
| Mg5 | 5.308094  | 2.331366  | 0.000348  |
| Mg6 | 2.003436  | -1.579242 | 1.483807  |
| Mg7 | -3.544239 | 0.025894  | -0.000202 |
| Mg8 | -6.299390 | 0.374984  | -1.638356 |
| Mg9 | -6.299036 | 0.374197  | 1.638731  |

@mg09-isomer34 bp86/6-31G(d) Etot=-1800.720265 Eb=-6.48

|     |           |           |           |
|-----|-----------|-----------|-----------|
| Mg1 | -2.539145 | 1.651407  | 1.479497  |
| Mg2 | -2.539501 | 1.651847  | -1.479101 |
| Mg3 | 0.413375  | 2.337072  | -0.000038 |
| Mg4 | 2.206706  | -0.216547 | -0.000181 |
| Mg5 | -4.025163 | -0.651189 | 0.000014  |
| Mg6 | 5.346862  | -0.584222 | -0.000022 |
| Mg7 | -0.881167 | -0.590672 | -0.000275 |
| Mg8 | 8.669061  | -1.047412 | 0.000100  |

|                                                          |           |           |           |
|----------------------------------------------------------|-----------|-----------|-----------|
| Mg9                                                      | -6.651027 | -2.550284 | 0.000006  |
| @mg09-isomer35 bp86/6-31G(d) Etot=-1800.718134 Eb=-6.33  |           |           |           |
| Mg1                                                      | 4.287271  | -0.656909 | 1.602962  |
| Mg2                                                      | 1.553834  | 0.002173  | -0.000146 |
| Mg3                                                      | -1.611943 | 0.000536  | 0.000663  |
| Mg4                                                      | -4.802780 | -0.000159 | 0.000497  |
| Mg5                                                      | -7.595259 | -1.622463 | -0.000345 |
| Mg6                                                      | 7.188664  | -0.002067 | -0.000054 |
| Mg7                                                      | 4.286966  | -1.059696 | -1.370609 |
| Mg8                                                      | 4.288879  | 1.717064  | -0.232628 |
| Mg9                                                      | -7.595634 | 1.621523  | -0.000340 |
| @mg09-isomer36 bp86/6-31G(d) Etot=-1800.717925 Eb=-6.31  |           |           |           |
| Mg1                                                      | -2.778373 | -1.129269 | -0.001591 |
| Mg2                                                      | -4.776146 | 0.808998  | 1.486176  |
| Mg3                                                      | 0.229736  | -0.329100 | -0.001332 |
| Mg4                                                      | -4.778477 | 0.810808  | -1.484104 |
| Mg5                                                      | 3.366057  | -0.200982 | -0.000510 |
| Mg6                                                      | -1.957734 | 1.934602  | -0.000162 |
| Mg7                                                      | -5.907461 | -1.721600 | 0.000392  |
| Mg8                                                      | 6.617324  | -0.208459 | 0.001557  |
| Mg9                                                      | 9.985072  | 0.035003  | -0.000427 |
| @mg09-isomer37 bp86/6-31G(d) Etot=-1800.708469 Eb=-5.66  |           |           |           |
| Mg1                                                      | -1.533571 | -0.024320 | -0.322742 |
| Mg2                                                      | 0.000300  | 1.237578  | -2.650622 |
| Mg3                                                      | 1.533583  | -0.024297 | -0.322364 |
| Mg4                                                      | -0.000053 | 2.597604  | 0.080244  |
| Mg5                                                      | 4.244459  | -1.565946 | 0.246166  |
| Mg6                                                      | 7.209197  | -3.109909 | 0.653083  |
| Mg7                                                      | -4.244180 | -1.566387 | 0.245757  |
| Mg8                                                      | -0.001043 | 5.566373  | 1.417335  |
| Mg9                                                      | -7.208692 | -3.110696 | 0.653142  |
| @mg10-isomer01 bp86/6-31G(d) Etot=-2000.892523 Eb=-12.26 |           |           |           |
| Mg1                                                      | 1.911802  | -0.861051 | 1.590869  |
| Mg2                                                      | 0.399550  | -3.035216 | 0.083732  |
| Mg3                                                      | 1.911363  | -0.947363 | -1.541456 |
| Mg4                                                      | 1.911412  | 1.808446  | -0.050046 |
| Mg5                                                      | 0.399927  | 1.590080  | 2.586599  |
| Mg6                                                      | -1.141307 | -0.879634 | 1.625789  |
| Mg7                                                      | -1.141504 | -0.968023 | -1.574517 |
| Mg8                                                      | 0.399383  | 1.445076  | -2.670332 |
| Mg9                                                      | -1.141783 | 1.847946  | -0.050860 |
| Mg10                                                     | -3.508843 | -0.000260 | 0.000221  |
| @mg10-isomer02 bp86/6-31G(d) Etot=-2000.875833 Eb=-11.22 |           |           |           |
| Mg1                                                      | 1.955937  | 1.138720  | 0.512644  |
| Mg2                                                      | -1.099450 | 2.021969  | -0.296551 |
| Mg3                                                      | -0.592214 | 0.007075  | 2.243721  |
| Mg4                                                      | 1.331624  | 2.898866  | -1.863869 |
| Mg5                                                      | 2.264197  | -0.805376 | 2.806303  |
| Mg6                                                      | 1.099440  | -2.022007 | 0.296579  |
| Mg7                                                      | -3.352918 | 0.818402  | 1.318651  |
| Mg8                                                      | 0.592259  | -0.007084 | -2.243695 |
| Mg9                                                      | -1.955944 | -1.138696 | -0.512681 |
| Mg10                                                     | -0.242933 | -2.911870 | -2.261102 |
| @mg10-isomer03 bp86/6-31G(d) Etot=-2000.863680 Eb=-10.45 |           |           |           |
| Mg1                                                      | -5.600711 | 0.000013  | 0.000027  |
| Mg2                                                      | -2.420909 | -0.000004 | 0.000007  |
| Mg3                                                      | -0.301779 | -1.594664 | -1.574647 |
| Mg4                                                      | -0.301798 | 1.594488  | -1.574703 |

|                                                          |           |           |           |
|----------------------------------------------------------|-----------|-----------|-----------|
| Mg5                                                      | -0.301764 | -1.594493 | 1.574692  |
| Mg6                                                      | 2.475452  | -0.000075 | -1.580057 |
| Mg7                                                      | 2.138904  | 2.623849  | -0.000117 |
| Mg8                                                      | 2.138881  | -2.623852 | 0.000100  |
| Mg9                                                      | 2.475453  | 0.000069  | 1.580081  |
| Mg10                                                     | -0.301728 | 1.594668  | 1.574617  |
|                                                          |           |           |           |
| @mg10-isomer04 bp86/6-31G(d) Etot=-2000.862955 Eb=-10.41 |           |           |           |
| Mg1                                                      | -1.611750 | -0.201269 | 1.510660  |
| Mg2                                                      | -0.366497 | 2.648955  | 1.132812  |
| Mg3                                                      | 1.611879  | 0.201234  | 1.510720  |
| Mg4                                                      | -4.145121 | 0.250835  | -0.222275 |
| Mg5                                                      | 0.366506  | -2.648963 | 1.132794  |
| Mg6                                                      | 4.145104  | -0.250880 | -0.222398 |
| Mg7                                                      | 1.715193  | 1.903030  | -1.038931 |
| Mg8                                                      | -1.715226 | -1.903003 | -1.038967 |
| Mg9                                                      | -1.318594 | 1.196625  | -1.382205 |
| Mg10                                                     | 1.318506  | -1.196564 | -1.382210 |
|                                                          |           |           |           |
| @mg10-isomer05 bp86/6-31G(d) Etot=-2000.862692 Eb=-10.39 |           |           |           |
| Mg1                                                      | 1.633844  | 0.828240  | 1.345407  |
| Mg2                                                      | -1.633824 | 0.828398  | -1.345445 |
| Mg3                                                      | 1.392416  | -0.617096 | -1.590825 |
| Mg4                                                      | 1.270265  | -2.240709 | 0.931777  |
| Mg5                                                      | 0.965412  | 2.507957  | -1.183729 |
| Mg6                                                      | -4.106439 | -0.478693 | 0.005857  |
| Mg7                                                      | 4.106477  | -0.478737 | -0.005879 |
| Mg8                                                      | -1.270498 | -2.240577 | -0.931725 |
| Mg9                                                      | -0.965211 | 2.508102  | 1.183720  |
| Mg10                                                     | -1.392441 | -0.616886 | 1.590842  |
|                                                          |           |           |           |
| @mg10-isomer06 bp86/6-31G(d) Etot=-2000.860211 Eb=-10.24 |           |           |           |
| Mg1                                                      | -1.421557 | -1.048813 | 1.610563  |
| Mg2                                                      | -3.817456 | 0.017364  | -0.188607 |
| Mg3                                                      | 1.195219  | -2.061322 | 0.126846  |
| Mg4                                                      | -1.736198 | -2.596610 | -1.046833 |
| Mg5                                                      | 4.093162  | -0.772964 | 0.782385  |
| Mg6                                                      | 1.243331  | 0.842401  | 1.283764  |
| Mg7                                                      | 0.467910  | 2.956098  | -0.963446 |
| Mg8                                                      | -0.774083 | 0.237992  | -1.268976 |
| Mg9                                                      | -1.671294 | 2.058655  | 1.201528  |
| Mg10                                                     | 2.420966  | 0.367200  | -1.537223 |
|                                                          |           |           |           |
| @mg10-isomer07 bp86/6-31G(d) Etot=-2000.858469 Eb=-10.13 |           |           |           |
| Mg1                                                      | -3.200155 | -1.603609 | -0.762265 |
| Mg2                                                      | -0.578363 | -0.000081 | -1.183286 |
| Mg3                                                      | -3.200018 | 1.603705  | -0.762270 |
| Mg4                                                      | -2.038874 | 0.000061  | 1.607353  |
| Mg5                                                      | 2.097522  | 1.626468  | -1.045137 |
| Mg6                                                      | 2.097544  | -1.626474 | -1.045084 |
| Mg7                                                      | 1.227392  | -0.000046 | 1.453654  |
| Mg8                                                      | 4.490875  | 0.000021  | 0.221187  |
| Mg9                                                      | -0.447930 | 2.586649  | 0.757936  |
| Mg10                                                     | -0.447992 | -2.586693 | 0.757913  |
|                                                          |           |           |           |
| @mg10-isomer08 bp86/6-31G(d) Etot=-2000.858427 Eb=-10.13 |           |           |           |
| Mg1                                                      | -1.002077 | 0.575282  | -1.007321 |
| Mg2                                                      | -0.015064 | 2.043218  | 1.684463  |
| Mg3                                                      | 3.954466  | -1.154384 | 0.474299  |
| Mg4                                                      | 0.155916  | 3.380654  | -1.109015 |
| Mg5                                                      | -1.417440 | -2.358785 | -0.510559 |
| Mg6                                                      | 2.213475  | 1.163507  | -0.420622 |
| Mg7                                                      | 0.902135  | -1.182295 | 1.333048  |
| Mg8                                                      | -4.168675 | -0.396268 | -0.626232 |

|                                                          |           |           |           |  |
|----------------------------------------------------------|-----------|-----------|-----------|--|
| Mg9                                                      | -2.179952 | -0.365481 | 1.759579  |  |
| Mg10                                                     | 1.557217  | -1.705447 | -1.577639 |  |
| @mg10-isomer09 bp86/6-31G(d) Etot=-2000.858417 Eb=-10.12 |           |           |           |  |
| Mg1                                                      | -1.117119 | -0.463016 | 1.510254  |  |
| Mg2                                                      | 1.117128  | -1.510258 | -0.463015 |  |
| Mg3                                                      | -3.883489 | -0.000020 | -0.000003 |  |
| Mg4                                                      | 1.117123  | 1.510263  | 0.463017  |  |
| Mg5                                                      | -1.117119 | 0.463010  | -1.510256 |  |
| Mg6                                                      | -1.940959 | 2.490033  | 0.763501  |  |
| Mg7                                                      | -1.940963 | -2.490001 | -0.763501 |  |
| Mg8                                                      | 1.940944  | 0.763502  | -2.490014 |  |
| Mg9                                                      | 3.883517  | -0.000008 | -0.000002 |  |
| Mg10                                                     | 1.940936  | -0.763505 | 2.490019  |  |
| @mg10-isomer10 bp86/6-31G(d) Etot=-2000.857750 Eb=-10.08 |           |           |           |  |
| Mg1                                                      | 3.636797  | -0.743285 | 0.581181  |  |
| Mg2                                                      | -1.341761 | -1.388910 | -1.198744 |  |
| Mg3                                                      | 1.462022  | 0.487451  | -1.345780 |  |
| Mg4                                                      | 1.708127  | -2.526106 | -1.280221 |  |
| Mg5                                                      | 1.689474  | 1.845916  | 1.450006  |  |
| Mg6                                                      | 0.601728  | -1.261816 | 1.276189  |  |
| Mg7                                                      | -1.323635 | 1.316413  | 0.466345  |  |
| Mg8                                                      | -2.529388 | -1.194926 | 1.643612  |  |
| Mg9                                                      | -4.299773 | 0.121623  | -0.558012 |  |
| Mg10                                                     | 0.396409  | 3.343639  | -1.034576 |  |
| @mg10-isomer11 bp86/6-31G(d) Etot=-2000.856888 Eb=-10.03 |           |           |           |  |
| Mg1                                                      | 0.876532  | -2.128484 | 1.510534  |  |
| Mg2                                                      | -0.082870 | 1.121213  | 1.219646  |  |
| Mg3                                                      | 2.468031  | -2.778737 | -1.116563 |  |
| Mg4                                                      | -0.082790 | -1.121339 | -1.219659 |  |
| Mg5                                                      | 2.831125  | 0.000128  | -0.000106 |  |
| Mg6                                                      | -2.183304 | -1.109059 | 1.131892  |  |
| Mg7                                                      | -4.987423 | -0.000013 | 0.000009  |  |
| Mg8                                                      | -2.183353 | 1.108817  | -1.131916 |  |
| Mg9                                                      | 2.467769  | 2.778872  | 1.116650  |  |
| Mg10                                                     | 0.876283  | 2.128602  | -1.510487 |  |
| @mg10-isomer12 bp86/6-31G(d) Etot=-2000.856661 Eb=-10.01 |           |           |           |  |
| Mg1                                                      | 1.922763  | -2.984272 | -1.250900 |  |
| Mg2                                                      | -0.458016 | -1.915348 | 0.312702  |  |
| Mg3                                                      | 1.610543  | 0.030548  | -1.368819 |  |
| Mg4                                                      | 0.605664  | 2.904283  | -1.147044 |  |
| Mg5                                                      | -2.637175 | -0.279690 | 1.680028  |  |
| Mg6                                                      | 2.993341  | 1.875450  | 0.750205  |  |
| Mg7                                                      | -4.904175 | -0.183968 | -0.472598 |  |
| Mg8                                                      | 2.527400  | -1.253701 | 1.287890  |  |
| Mg9                                                      | -1.732234 | 0.644288  | -1.133443 |  |
| Mg10                                                     | 0.071888  | 1.162409  | 1.341980  |  |
| @mg10-isomer13 bp86/6-31G(d) Etot=-2000.855433 Eb=-9.94  |           |           |           |  |
| Mg1                                                      | -1.457569 | 1.131263  | 1.336573  |  |
| Mg2                                                      | -2.423063 | 1.399295  | -1.583251 |  |
| Mg3                                                      | 0.539441  | -1.597257 | 1.682517  |  |
| Mg4                                                      | -1.841247 | -1.460842 | -0.357483 |  |
| Mg5                                                      | 0.909126  | -2.847977 | -1.073548 |  |
| Mg6                                                      | 3.208521  | -0.828117 | 0.110217  |  |
| Mg7                                                      | 1.800500  | 1.518321  | 1.640545  |  |
| Mg8                                                      | 0.553846  | 0.438840  | -1.040506 |  |
| Mg9                                                      | 3.200475  | 2.024247  | -1.094834 |  |
| Mg10                                                     | -4.490031 | 0.222228  | 0.379770  |  |
| @mg10-isomer14 bp86/6-31G(d) Etot=-2000.854863 Eb=-9.90  |           |           |           |  |

|      |           |           |           |
|------|-----------|-----------|-----------|
| Mg1  | 3.818746  | 0.000242  | 0.875776  |
| Mg2  | 1.511927  | -0.000269 | -1.285478 |
| Mg3  | 1.072948  | 3.022891  | -1.388835 |
| Mg4  | 0.941254  | 1.599558  | 1.349690  |
| Mg5  | 0.941353  | -1.599637 | 1.349832  |
| Mg6  | 1.072406  | -3.023406 | -1.388559 |
| Mg7  | -1.570038 | 1.603390  | -0.654791 |
| Mg8  | -1.570047 | -1.603068 | -0.654664 |
| Mg9  | -1.885798 | 0.000169  | 1.948360  |
| Mg10 | -4.332750 | 0.000129  | -0.151329 |

@mg10-isomer15 bp86/6-31G(d) Etot=-2000.853941 Eb=-9.84

|      |           |           |           |
|------|-----------|-----------|-----------|
| Mg1  | -0.195795 | -1.138399 | 1.110455  |
| Mg2  | -2.860854 | 0.061031  | 0.364878  |
| Mg3  | 1.985530  | 1.428221  | 1.739297  |
| Mg4  | -0.495389 | 1.848745  | -0.229261 |
| Mg5  | 1.341546  | -2.888222 | -1.034951 |
| Mg6  | -0.958979 | -0.814258 | -1.906500 |
| Mg7  | 2.243673  | 0.014369  | -1.047832 |
| Mg8  | 2.771800  | -1.698031 | 1.515701  |
| Mg9  | 2.203863  | 3.038140  | -0.932687 |
| Mg10 | -6.035394 | 0.148404  | 0.420899  |

@mg10-isomer16 bp86/6-31G(d) Etot=-2000.853440 Eb=-9.81

|      |           |           |           |
|------|-----------|-----------|-----------|
| Mg1  | 2.560388  | 1.062003  | 0.336774  |
| Mg2  | 2.210632  | -1.615087 | -1.353570 |
| Mg3  | 1.135552  | 3.382505  | -1.013402 |
| Mg4  | -0.264254 | 0.735993  | -1.475867 |
| Mg5  | -0.312383 | 1.996956  | 1.389194  |
| Mg6  | 3.339292  | -1.604046 | 1.530977  |
| Mg7  | -2.439130 | -0.296445 | 0.510680  |
| Mg8  | -0.949192 | -2.220926 | -1.527900 |
| Mg9  | -5.621415 | -0.141632 | 0.425736  |
| Mg10 | 0.340509  | -1.299322 | 1.177378  |

@mg10-isomer17 bp86/6-31G(d) Etot=-2000.853428 Eb=-9.81

|      |           |           |           |
|------|-----------|-----------|-----------|
| Mg1  | -2.048802 | 0.507835  | 1.714947  |
| Mg2  | -2.169377 | 2.068449  | -0.946626 |
| Mg3  | -4.570954 | 0.119009  | -0.161119 |
| Mg4  | 0.617052  | 1.614557  | 0.456728  |
| Mg5  | 0.565056  | -1.571489 | 1.592521  |
| Mg6  | 3.314331  | 0.451409  | 1.450236  |
| Mg7  | 3.152016  | 2.005258  | -1.236485 |
| Mg8  | -1.313255 | -0.889936 | -0.930192 |
| Mg9  | 2.102551  | -0.861885 | -1.089097 |
| Mg10 | 0.351382  | -3.443207 | -0.850911 |

@mg10-isomer18 bp86/6-31G(d) Etot=-2000.853379 Eb=-9.81

|      |           |           |           |
|------|-----------|-----------|-----------|
| Mg1  | -0.266204 | -1.722643 | -0.973997 |
| Mg2  | -0.266444 | 1.722733  | -0.973969 |
| Mg3  | 2.477577  | -3.014634 | -0.650530 |
| Mg4  | -1.680713 | -0.000095 | 1.241780  |
| Mg5  | 2.652495  | 0.000079  | -0.443120 |
| Mg6  | 2.477364  | 3.014745  | -0.650482 |
| Mg7  | 1.142272  | 1.674580  | 1.789977  |
| Mg8  | -2.709837 | -0.000099 | -1.653606 |
| Mg9  | -4.968889 | -0.000073 | 0.523978  |
| Mg10 | 1.142380  | -1.674592 | 1.789968  |

@mg10-isomer19 bp86/6-31G(d) Etot=-2000.852884 Eb=-9.78

|     |           |           |           |
|-----|-----------|-----------|-----------|
| Mg1 | 1.594700  | 3.351359  | -0.763615 |
| Mg2 | 0.893122  | 1.498753  | 1.587056  |
| Mg3 | -2.166751 | 0.307536  | 1.373607  |
| Mg4 | -5.115866 | -0.211738 | 0.175765  |

|                |               |                   |           |
|----------------|---------------|-------------------|-----------|
| Mg5            | 0.047944      | -1.606997         | 0.402613  |
| Mg6            | -2.495283     | -1.173208         | -1.309144 |
| Mg7            | 2.563410      | 0.434369          | -0.869161 |
| Mg8            | 2.808623      | -1.295526         | 1.686314  |
| Mg9            | -0.642871     | 1.314015          | -1.147007 |
| Mg10           | 2.512972      | -2.618562         | -1.136428 |
|                |               |                   |           |
| @mg10-isomer20 | bp86/6-31G(d) | Etot=-2000.852493 | Eb=-9.75  |
| Mg1            | -1.949439     | 1.610102          | -0.584986 |
| Mg2            | -1.949081     | -1.609479         | -0.586232 |
| Mg3            | -2.571052     | -0.000753         | 1.943890  |
| Mg4            | 0.930748      | 2.714076          | -0.972426 |
| Mg5            | 0.417973      | -0.000019         | 0.803062  |
| Mg6            | 3.176345      | 1.597504          | 1.057575  |
| Mg7            | 3.176573      | -1.597253         | 1.057610  |
| Mg8            | 2.472985      | 0.000023          | -1.494560 |
| Mg9            | -4.636121     | -0.000063         | -0.251661 |
| Mg10           | 0.931067      | -2.714139         | -0.972272 |
|                |               |                   |           |
| @mg10-isomer21 | bp86/6-31G(d) | Etot=-2000.852151 | Eb=-9.73  |
| Mg1            | -1.750370     | 1.051530          | 1.039229  |
| Mg2            | 1.183987      | 2.013022          | 1.467662  |
| Mg3            | -2.157870     | -0.328333         | -1.695076 |
| Mg4            | -0.069777     | 2.283698          | -1.378798 |
| Mg5            | -4.644731     | -0.170229         | 0.146219  |
| Mg6            | 0.524091      | -0.935612         | 0.001123  |
| Mg7            | 2.873965      | 0.925313          | -0.975305 |
| Mg8            | -2.313392     | -2.064597         | 0.837837  |
| Mg9            | 3.185433      | -2.114547         | -1.080256 |
| Mg10           | 3.168666      | -0.660244         | 1.637365  |
|                |               |                   |           |
| @mg10-isomer22 | bp86/6-31G(d) | Etot=-2000.851385 | Eb=-9.68  |
| Mg1            | -0.132154     | 1.667264          | -0.268171 |
| Mg2            | -2.456897     | 0.001381          | -1.250814 |
| Mg3            | -4.970594     | -0.000720         | 0.667735  |
| Mg4            | 2.585429      | 2.726786          | 0.629545  |
| Mg5            | 1.529241      | -0.002168         | 1.947784  |
| Mg6            | -1.833393     | -0.002035         | 1.820008  |
| Mg7            | 2.693561      | 0.000922          | -0.856453 |
| Mg8            | -0.132184     | -1.666650         | -0.271865 |
| Mg9            | 0.131613      | 0.003416          | -3.041372 |
| Mg10           | 2.585378      | -2.728196         | 0.623604  |
|                |               |                   |           |
| @mg10-isomer23 | bp86/6-31G(d) | Etot=-2000.851347 | Eb=-9.68  |
| Mg1            | 3.535290      | 1.518217          | 0.714788  |
| Mg2            | 3.535226      | -1.518114         | 0.714614  |
| Mg3            | 1.082272      | 2.716313          | -0.734205 |
| Mg4            | 0.646379      | -0.000156         | -2.033510 |
| Mg5            | 1.082167      | -2.716482         | -0.734008 |
| Mg6            | 0.640637      | 0.000016          | 0.969214  |
| Mg7            | -1.800558     | 1.713930          | -0.352641 |
| Mg8            | -1.800664     | -1.714041         | -0.352107 |
| Mg9            | -2.549292     | 0.000294          | 2.120064  |
| Mg10           | -4.371459     | 0.000024          | -0.312210 |
|                |               |                   |           |
| @mg10-isomer24 | bp86/6-31G(d) | Etot=-2000.851184 | Eb=-9.67  |
| Mg1            | 1.127080      | 1.175567          | 0.654909  |
| Mg2            | -1.592004     | 2.807108          | 0.222468  |
| Mg3            | -4.012995     | 0.846804          | -0.386225 |
| Mg4            | -1.052604     | 0.036166          | -1.303021 |
| Mg5            | -1.806847     | -0.045985         | 1.560971  |
| Mg6            | 2.308731      | -0.616431         | -1.661164 |
| Mg7            | 4.172546      | 1.505090          | -0.250583 |
| Mg8            | 3.494773      | -1.289585         | 0.982116  |



|                                                         |           |           |           |  |
|---------------------------------------------------------|-----------|-----------|-----------|--|
| Mg9                                                     | -2.968218 | -2.305578 | -0.274118 |  |
| Mg10                                                    | 0.329539  | -2.113156 | 0.454646  |  |
|                                                         |           |           |           |  |
| @mg10-isomer25 bp86/6-31G(d) Etot=-2000.850757 Eb=-9.64 |           |           |           |  |
| Mg1                                                     | -0.432480 | 1.690838  | -0.612236 |  |
| Mg2                                                     | -0.942531 | -0.000151 | 2.003137  |  |
| Mg3                                                     | 1.878211  | 1.656271  | 1.596663  |  |
| Mg4                                                     | 1.878518  | -1.656123 | 1.596620  |  |
| Mg5                                                     | -6.102640 | -0.000012 | -0.350303 |  |
| Mg6                                                     | -2.929818 | -0.000301 | -0.328663 |  |
| Mg7                                                     | 2.247645  | 3.020868  | -1.148343 |  |
| Mg8                                                     | 2.587129  | 0.000165  | -0.996191 |  |
| Mg9                                                     | 2.248140  | -3.020576 | -1.148441 |  |
| Mg10                                                    | -0.432175 | -1.690978 | -0.612242 |  |
|                                                         |           |           |           |  |
| @mg10-isomer26 bp86/6-31G(d) Etot=-2000.850217 Eb=-9.61 |           |           |           |  |
| Mg1                                                     | -0.786151 | -2.990258 | -0.651120 |  |
| Mg2                                                     | 1.852973  | -1.137525 | -1.032515 |  |
| Mg3                                                     | 0.066401  | -1.021969 | 1.514850  |  |
| Mg4                                                     | 3.542795  | -0.276899 | 1.431540  |  |
| Mg5                                                     | -1.131245 | 0.108306  | -1.234177 |  |
| Mg6                                                     | -3.216130 | -0.958669 | 0.745348  |  |
| Mg7                                                     | 1.357890  | 1.693335  | 0.331830  |  |
| Mg8                                                     | -3.942757 | 1.532635  | -1.051368 |  |
| Mg9                                                     | 4.030265  | 1.206226  | -1.285645 |  |
| Mg10                                                    | -1.774042 | 1.844818  | 1.231258  |  |
|                                                         |           |           |           |  |
| @mg10-isomer27 bp86/6-31G(d) Etot=-2000.849783 Eb=-9.58 |           |           |           |  |
| Mg1                                                     | 2.764926  | 2.712321  | -0.000434 |  |
| Mg2                                                     | -0.106074 | 1.689373  | -0.000360 |  |
| Mg3                                                     | -0.783076 | -0.000669 | -2.638850 |  |
| Mg4                                                     | -2.567905 | -0.000259 | -0.000107 |  |
| Mg5                                                     | 2.272581  | 0.000390  | 1.527839  |  |
| Mg6                                                     | -0.783244 | 0.000423  | 2.638768  |  |
| Mg7                                                     | -5.729421 | 0.000097  | 0.000041  |  |
| Mg8                                                     | 2.765327  | -2.712037 | 0.000529  |  |
| Mg9                                                     | 2.272677  | -0.000183 | -1.527744 |  |
| Mg10                                                    | -0.105791 | -1.689455 | 0.000317  |  |
|                                                         |           |           |           |  |
| @mg10-isomer28 bp86/6-31G(d) Etot=-2000.849196 Eb=-9.55 |           |           |           |  |
| Mg1                                                     | -2.719246 | -0.627292 | 0.000224  |  |
| Mg2                                                     | -5.919958 | -0.670723 | 0.000099  |  |
| Mg3                                                     | 0.107570  | -1.706901 | 0.000244  |  |
| Mg4                                                     | -0.592030 | 1.076670  | 1.529470  |  |
| Mg5                                                     | 3.097441  | -1.940729 | 0.000057  |  |
| Mg6                                                     | -0.592262 | 1.076315  | -1.529490 |  |
| Mg7                                                     | 1.774638  | -0.825943 | 2.637970  |  |
| Mg8                                                     | 0.720930  | 3.510915  | -0.000458 |  |
| Mg9                                                     | 1.774138  | -0.826713 | -2.637929 |  |
| Mg10                                                    | 2.348780  | 0.934401  | -0.000186 |  |
|                                                         |           |           |           |  |
| @mg10-isomer29 bp86/6-31G(d) Etot=-2000.848016 Eb=-9.47 |           |           |           |  |
| Mg1                                                     | -2.221168 | -1.316575 | 1.282685  |  |
| Mg2                                                     | -0.994111 | -3.139535 | -1.044298 |  |
| Mg3                                                     | -4.239404 | 0.992115  | 0.499660  |  |
| Mg4                                                     | -1.170905 | 1.843784  | 0.893223  |  |
| Mg5                                                     | -1.861457 | -0.011091 | -1.462684 |  |
| Mg6                                                     | 0.770777  | -0.914837 | 0.040946  |  |
| Mg7                                                     | 3.466464  | -1.268975 | 1.514559  |  |
| Mg8                                                     | 2.041485  | 1.583760  | 1.159038  |  |
| Mg9                                                     | 0.663623  | 1.992265  | -1.674464 |  |
| Mg10                                                    | 3.544696  | 0.239089  | -1.208664 |  |
|                                                         |           |           |           |  |
| @mg10-isomer30 bp86/6-31G(d) Etot=-2000.847129 Eb=-9.42 |           |           |           |  |

|      |           |           |           |
|------|-----------|-----------|-----------|
| Mg1  | -1.127359 | 0.072885  | -1.203195 |
| Mg2  | -2.083078 | -0.978783 | 1.597609  |
| Mg3  | 1.127356  | 0.072914  | 1.203205  |
| Mg4  | -3.999973 | 0.784624  | 0.067842  |
| Mg5  | -1.135470 | 2.231014  | 1.103701  |
| Mg6  | -3.407760 | -2.109701 | -1.025927 |
| Mg7  | 3.999960  | 0.784596  | -0.067800 |
| Mg8  | 1.135541  | 2.230978  | -1.103743 |
| Mg9  | 2.083073  | -0.978784 | -1.597606 |
| Mg10 | 3.407709  | -2.109742 | 1.025914  |

@mg10-isomer31 bp86/6-31G(d) Etot=-2000.846816 Eb=-9.40

|      |           |           |           |
|------|-----------|-----------|-----------|
| Mg1  | 3.537136  | 2.502113  | -0.332106 |
| Mg2  | 3.175724  | -0.282588 | 1.160352  |
| Mg3  | 1.978598  | -0.109115 | -1.505906 |
| Mg4  | 0.625993  | 1.858757  | 0.585639  |
| Mg5  | 2.536824  | -3.011359 | -0.242053 |
| Mg6  | -1.565676 | 0.476205  | -1.348180 |
| Mg7  | -2.205438 | 0.666658  | 1.551086  |
| Mg8  | -3.485819 | -1.782158 | -0.059624 |
| Mg9  | -0.010044 | -1.467871 | 0.588600  |
| Mg10 | -4.587298 | 1.149358  | -0.397806 |

@mg10-isomer32 bp86/6-31G(d) Etot=-2000.846810 Eb=-9.40

|      |           |           |           |
|------|-----------|-----------|-----------|
| Mg1  | 0.943319  | 0.944486  | 0.088622  |
| Mg2  | 3.608297  | 0.165645  | 1.650353  |
| Mg3  | -2.090420 | 1.503328  | -1.019200 |
| Mg4  | 1.077231  | -2.061877 | 1.186782  |
| Mg5  | 3.795326  | 2.008764  | -0.804784 |
| Mg6  | -3.997901 | -0.818751 | -0.960357 |
| Mg7  | -4.156500 | 1.426082  | 1.293790  |
| Mg8  | 3.018018  | -0.979755 | -1.143811 |
| Mg9  | -0.466656 | -1.522386 | -1.508785 |
| Mg10 | -1.730715 | -0.665536 | 1.217389  |

@mg10-isomer33 bp86/6-31G(d) Etot=-2000.846260 Eb=-9.36

|      |           |           |           |
|------|-----------|-----------|-----------|
| Mg1  | 3.374274  | 0.578156  | -0.208611 |
| Mg2  | 2.391988  | 3.467361  | -0.117586 |
| Mg3  | 0.016667  | 1.520809  | 0.287528  |
| Mg4  | 3.552476  | -2.531287 | -0.270936 |
| Mg5  | -2.251954 | 0.222089  | -1.707314 |
| Mg6  | -4.525917 | -1.249503 | -0.118670 |
| Mg7  | 0.842491  | -1.226323 | -1.210544 |
| Mg8  | 1.574116  | -1.182349 | 1.661629  |
| Mg9  | -3.429122 | 1.549185  | 0.760116  |
| Mg10 | -1.545021 | -1.148138 | 0.924389  |

@mg10-isomer34 bp86/6-31G(d) Etot=-2000.846072 Eb=-9.35

|      |           |           |           |
|------|-----------|-----------|-----------|
| Mg1  | -4.890309 | 1.073242  | -0.000026 |
| Mg2  | -3.064184 | -0.957996 | 1.494672  |
| Mg3  | -3.064240 | -0.958139 | -1.494577 |
| Mg4  | -1.855879 | 1.623316  | -0.000063 |
| Mg5  | -0.119141 | -1.018430 | 0.000021  |
| Mg6  | 2.147549  | -3.122243 | 0.000019  |
| Mg7  | 2.742208  | -0.413179 | 1.453872  |
| Mg8  | 1.144533  | 2.088247  | 0.000037  |
| Mg9  | 2.742125  | -0.413174 | -1.453950 |
| Mg10 | 4.217339  | 2.098357  | -0.000006 |

@mg10-isomer35 bp86/6-31G(d) Etot=-2000.845689 Eb=-9.33

|     |           |           |           |
|-----|-----------|-----------|-----------|
| Mg1 | -2.035836 | 1.454395  | -1.060343 |
| Mg2 | 0.708302  | 1.785423  | 0.680580  |
| Mg3 | -4.637410 | 0.794892  | 0.460130  |
| Mg4 | -1.689257 | -0.254690 | 1.429702  |

|                              |                   |           |           |
|------------------------------|-------------------|-----------|-----------|
| Mg5                          | -3.190117         | -1.481993 | -1.075197 |
| Mg6                          | 0.199695          | -1.024878 | -0.943868 |
| Mg7                          | 3.324899          | 3.068598  | -0.448086 |
| Mg8                          | 3.306056          | -0.047888 | -0.368776 |
| Mg9                          | 1.436037          | -1.272568 | 1.788600  |
| Mg10                         | 2.577631          | -3.021292 | -0.462741 |
|                              |                   |           |           |
| @mg10-isomer36 bp86/6-31G(d) | Etot=-2000.845638 | Eb=-9.32  |           |
| Mg1                          | -4.443849         | 0.787074  | 0.000499  |
| Mg2                          | 3.276123          | 0.700364  | -1.478854 |
| Mg3                          | 3.271908          | 0.699836  | 1.481197  |
| Mg4                          | 1.264619          | 2.758131  | -0.000859 |
| Mg5                          | -0.145757         | -2.974316 | -0.000102 |
| Mg6                          | 3.004582          | -2.011289 | 0.000334  |
| Mg7                          | -2.418471         | -1.044949 | -1.464010 |
| Mg8                          | -1.810318         | 2.199702  | -0.000353 |
| Mg9                          | -2.416116         | -1.042917 | 1.464876  |
| Mg10                         | 0.417279          | -0.071637 | -0.002728 |
|                              |                   |           |           |
| @mg10-isomer37 bp86/6-31G(d) | Etot=-2000.842865 | Eb=-9.15  |           |
| Mg1                          | -3.017611         | 1.973178  | -0.693400 |
| Mg2                          | -3.000620         | -1.069537 | -1.162945 |
| Mg3                          | -0.000011         | 0.414721  | -1.308139 |
| Mg4                          | -1.635031         | -0.116745 | 1.354930  |
| Mg5                          | -4.771172         | 0.244846  | 1.254963  |
| Mg6                          | 0.000029          | -2.478260 | -0.198978 |
| Mg7                          | 3.017683          | 1.973188  | -0.693422 |
| Mg8                          | 3.000569          | -1.069548 | -1.162896 |
| Mg9                          | 1.635005          | -0.116622 | 1.354939  |
| Mg10                         | 4.771159          | 0.244779  | 1.254950  |
|                              |                   |           |           |
| @mg10-isomer38 bp86/6-31G(d) | Etot=-2000.842383 | Eb=-9.12  |           |
| Mg1                          | 1.598743          | -0.317761 | 1.200834  |
| Mg2                          | -1.598716         | 0.317908  | 1.200776  |
| Mg3                          | -3.738447         | -1.790993 | 0.221326  |
| Mg4                          | 0.461308          | 1.475821  | -1.184919 |
| Mg5                          | 3.738332          | 1.791059  | 0.220995  |
| Mg6                          | 2.925408          | -0.712450 | -1.459050 |
| Mg7                          | -0.461327         | -1.476089 | -1.184646 |
| Mg8                          | 4.690872          | -1.019807 | 1.222020  |
| Mg9                          | -2.925364         | 0.712183  | -1.459171 |
| Mg10                         | -4.690809         | 1.020129  | 1.221834  |
|                              |                   |           |           |
| @mg10-isomer39 bp86/6-31G(d) | Etot=-2000.841926 | Eb=-9.09  |           |
| Mg1                          | -0.733032         | -1.571723 | -0.068075 |
| Mg2                          | -0.733024         | 1.571730  | -0.068195 |
| Mg3                          | -3.529929         | 0.000061  | 0.406010  |
| Mg4                          | 1.762985          | -0.000046 | -1.758900 |
| Mg5                          | 4.422259          | -0.000052 | -0.324868 |
| Mg6                          | -1.407470         | 0.000111  | 2.529846  |
| Mg7                          | -6.187526         | -0.000083 | -1.413742 |
| Mg8                          | 2.398139          | -2.649371 | -0.278368 |
| Mg9                          | 2.398209          | 2.649335  | -0.278515 |
| Mg10                         | 1.609390          | 0.000038  | 1.254808  |
|                              |                   |           |           |
| @mg10-isomer40 bp86/6-31G(d) | Etot=-2000.841488 | Eb=-9.06  |           |
| Mg1                          | 2.065018          | -1.557332 | -0.462907 |
| Mg2                          | 2.939586          | -0.000004 | 2.090066  |
| Mg3                          | 2.064999          | 1.557361  | -0.462905 |
| Mg4                          | -0.582958         | -0.000004 | -1.941011 |
| Mg5                          | -1.070325         | -2.657197 | -0.422080 |
| Mg6                          | -0.169440         | -0.000007 | 1.051170  |
| Mg7                          | -3.073217         | -0.000008 | -0.255327 |
| Mg8                          | -1.070319         | 2.657175  | -0.422083 |

|                                                         |           |           |           |  |
|---------------------------------------------------------|-----------|-----------|-----------|--|
| Mg9                                                     | 4.959301  | 0.000001  | -0.169806 |  |
| Mg10                                                    | -6.062644 | 0.000015  | 0.994882  |  |
|                                                         |           |           |           |  |
| @mg10-isomer41 bp86/6-31G(d) Etot=-2000.840795 Eb=-9.02 |           |           |           |  |
| Mg1                                                     | 1.806693  | 2.272904  | 0.466164  |  |
| Mg2                                                     | 4.714650  | 1.024550  | -0.233407 |  |
| Mg3                                                     | 1.839560  | -0.279405 | -1.195058 |  |
| Mg4                                                     | -0.951042 | 1.587087  | -1.331438 |  |
| Mg5                                                     | -3.394561 | -0.065421 | -0.097675 |  |
| Mg6                                                     | -0.387780 | -0.221792 | 1.055666  |  |
| Mg7                                                     | -1.180252 | -1.541389 | -1.561718 |  |
| Mg8                                                     | 2.816958  | -0.471232 | 1.663865  |  |
| Mg9                                                     | 1.121890  | -2.988179 | 0.348402  |  |
| Mg10                                                    | -6.386115 | 0.682876  | 0.885199  |  |
|                                                         |           |           |           |  |
| @mg10-isomer42 bp86/6-31G(d) Etot=-2000.839170 Eb=-8.92 |           |           |           |  |
| Mg1                                                     | 5.352251  | 1.160732  | -0.000360 |  |
| Mg2                                                     | 0.831478  | -1.743496 | 0.000304  |  |
| Mg3                                                     | -3.469087 | 1.076761  | -1.486867 |  |
| Mg4                                                     | -3.469476 | 1.076412  | 1.486969  |  |
| Mg5                                                     | -0.509590 | 1.131742  | 0.000477  |  |
| Mg6                                                     | 2.447545  | 0.575209  | -1.455785 |  |
| Mg7                                                     | 4.199781  | -1.677509 | -0.000175 |  |
| Mg8                                                     | -5.487314 | -0.768438 | -0.000443 |  |
| Mg9                                                     | -2.343532 | -1.406613 | -0.000072 |  |
| Mg10                                                    | 2.447944  | 0.575199  | 1.455951  |  |
|                                                         |           |           |           |  |
| @mg10-isomer43 bp86/6-31G(d) Etot=-2000.837479 Eb=-8.81 |           |           |           |  |
| Mg1                                                     | -6.718616 | 0.316387  | 0.818556  |  |
| Mg2                                                     | -3.706463 | -0.257117 | -0.186658 |  |
| Mg3                                                     | -1.200991 | 0.723221  | -1.732552 |  |
| Mg4                                                     | -0.783924 | 0.244966  | 1.167798  |  |
| Mg5                                                     | 1.203531  | 2.433285  | -0.296871 |  |
| Mg6                                                     | -1.429343 | -2.215141 | -0.687392 |  |
| Mg7                                                     | 2.691315  | 0.480332  | 1.830859  |  |
| Mg8                                                     | 1.528313  | -0.801223 | -0.716340 |  |
| Mg9                                                     | 4.194917  | 0.994284  | -0.677073 |  |
| Mg10                                                    | 4.221261  | -1.918994 | 0.479673  |  |
|                                                         |           |           |           |  |
| @mg10-isomer44 bp86/6-31G(d) Etot=-2000.837312 Eb=-8.80 |           |           |           |  |
| Mg1                                                     | -2.172136 | -2.506531 | -0.378963 |  |
| Mg2                                                     | -4.902539 | -1.271689 | 0.350754  |  |
| Mg3                                                     | -2.086590 | 0.065437  | 1.459575  |  |
| Mg4                                                     | 3.234853  | -0.544744 | 0.052750  |  |
| Mg5                                                     | 1.302327  | 1.258398  | 1.704228  |  |
| Mg6                                                     | -0.992038 | 2.712306  | -0.111575 |  |
| Mg7                                                     | 2.164041  | 2.176094  | -0.981564 |  |
| Mg8                                                     | 6.123183  | -1.979753 | -0.039101 |  |
| Mg9                                                     | 0.220883  | -0.338453 | -0.687944 |  |
| Mg10                                                    | -2.891985 | 0.428934  | -1.368161 |  |
|                                                         |           |           |           |  |
| @mg10-isomer45 bp86/6-31G(d) Etot=-2000.837165 Eb=-8.79 |           |           |           |  |
| Mg1                                                     | 5.886349  | -2.391881 | 0.000200  |  |
| Mg2                                                     | 2.913900  | -1.157487 | -0.000279 |  |
| Mg3                                                     | 1.495341  | 1.229498  | -1.453092 |  |
| Mg4                                                     | -0.123155 | -1.293669 | -0.000217 |  |
| Mg5                                                     | -2.762034 | -0.674968 | -1.506561 |  |
| Mg6                                                     | -2.761825 | -0.675141 | 1.506590  |  |
| Mg7                                                     | -5.302756 | -1.865500 | 0.000113  |  |
| Mg8                                                     | 1.495393  | 1.229260  | 1.453001  |  |
| Mg9                                                     | -1.483054 | 1.693852  | 0.000060  |  |
| Mg10                                                    | 0.641841  | 3.906037  | 0.000185  |  |
|                                                         |           |           |           |  |
| @mg10-isomer46 bp86/6-31G(d) Etot=-2000.836672 Eb=-8.76 |           |           |           |  |

|      |           |           |           |
|------|-----------|-----------|-----------|
| Mg1  | -2.110113 | -1.474966 | 1.517591  |
| Mg2  | -5.017324 | -0.867022 | 0.300329  |
| Mg3  | -2.567401 | -1.763434 | -1.462620 |
| Mg4  | 0.904478  | 1.064086  | 1.451316  |
| Mg5  | 0.416363  | -1.394039 | -0.445141 |
| Mg6  | -0.607619 | 3.677591  | 0.143635  |
| Mg7  | 3.307496  | -0.322352 | -0.006683 |
| Mg8  | 1.326972  | 1.571544  | -1.406339 |
| Mg9  | 6.317437  | -1.462982 | 0.195563  |
| Mg10 | -1.970290 | 0.971573  | -0.287651 |

@mg10-isomer47 bp86/6-31G(d) Etot=-2000.836141 Eb=-8.73

|      |           |           |           |
|------|-----------|-----------|-----------|
| Mg1  | -3.753673 | -0.000487 | 0.992088  |
| Mg2  | -0.719768 | -1.626692 | 0.548509  |
| Mg3  | -3.398539 | -2.782342 | -0.384806 |
| Mg4  | 1.571697  | 0.001225  | 1.845708  |
| Mg5  | -3.400193 | 2.781075  | -0.385718 |
| Mg6  | -2.460866 | -0.000555 | -1.637344 |
| Mg7  | 7.368133  | -0.000879 | -0.608579 |
| Mg8  | 4.198152  | 0.000693  | 0.227377  |
| Mg9  | 1.315655  | 0.000494  | -1.145012 |
| Mg10 | -0.720598 | 1.627469  | 0.547777  |

@mg10-isomer48 bp86/6-31G(d) Etot=-2000.835966 Eb=-8.72

|      |           |           |           |
|------|-----------|-----------|-----------|
| Mg1  | 6.466224  | -1.086055 | -0.000172 |
| Mg2  | 3.440771  | -0.026355 | 0.000287  |
| Mg3  | 1.140728  | 1.363986  | 1.484123  |
| Mg4  | 1.140974  | 1.363856  | -1.484153 |
| Mg5  | 0.633090  | -1.407447 | 0.000084  |
| Mg6  | -2.282067 | -2.574477 | 0.000053  |
| Mg7  | -2.122425 | 0.097645  | 1.480566  |
| Mg8  | -1.408943 | 2.887541  | -0.000105 |
| Mg9  | -2.122166 | 0.097599  | -1.480474 |
| Mg10 | -4.886187 | -0.716295 | -0.000208 |

@mg10-isomer49 bp86/6-31G(d) Etot=-2000.832335 Eb=-8.49

|      |           |           |           |
|------|-----------|-----------|-----------|
| Mg1  | -1.438961 | -1.769416 | -0.189860 |
| Mg2  | -0.181029 | 1.314850  | -0.113592 |
| Mg3  | 1.434907  | -1.130688 | 1.280345  |
| Mg4  | -3.157268 | 0.720696  | -0.394350 |
| Mg5  | 1.678328  | -1.131324 | -1.671838 |
| Mg6  | 2.875251  | 1.291850  | -0.115879 |
| Mg7  | -1.795350 | 0.087439  | 2.285100  |
| Mg8  | 5.839637  | 2.540474  | -0.055265 |
| Mg9  | 0.839862  | -3.839975 | -0.296650 |
| Mg10 | -6.095376 | 1.916093  | -0.728010 |

@mg10-isomer50 bp86/6-31G(d) Etot=-2000.831004 Eb=-8.40

|      |           |           |           |
|------|-----------|-----------|-----------|
| Mg1  | -2.214427 | -1.424282 | 0.000231  |
| Mg2  | -0.957312 | 1.494635  | 0.000023  |
| Mg3  | 0.947774  | -1.127880 | 0.000209  |
| Mg4  | -5.354964 | -1.663688 | 0.000009  |
| Mg5  | 2.027606  | 1.369528  | 1.492490  |
| Mg6  | 2.027522  | 1.369221  | -1.492642 |
| Mg7  | 4.015359  | -0.631372 | 0.000071  |
| Mg8  | -3.857259 | 0.767991  | 1.492402  |
| Mg9  | 7.222671  | -0.921797 | -0.000072 |
| Mg10 | -3.856970 | 0.767644  | -1.492721 |

@mg10-isomer51 bp86/6-31G(d) Etot=-2000.830639 Eb=-8.38

|     |           |           |           |
|-----|-----------|-----------|-----------|
| Mg1 | -0.716923 | 1.643602  | 0.128261  |
| Mg2 | -3.574313 | 2.774007  | 0.342401  |
| Mg3 | 0.095825  | -0.000024 | -2.402284 |
| Mg4 | -3.315065 | -0.000042 | 1.804618  |

|                              |                   |           |           |
|------------------------------|-------------------|-----------|-----------|
| Mg5                          | 1.842630          | 0.000051  | 0.127515  |
| Mg6                          | -3.256669         | -0.000012 | -1.163308 |
| Mg7                          | 4.946001          | 0.000043  | 0.271639  |
| Mg8                          | -3.574268         | -2.774054 | 0.342335  |
| Mg9                          | -0.716909         | -1.643517 | 0.128365  |
| Mg10                         | 8.269692          | -0.000053 | 0.420457  |
|                              |                   |           |           |
| @mg10-isomer52 bp86/6-31G(d) | Etot=-2000.827924 | Eb=-8.21  |           |
| Mg1                          | 1.210010          | -0.965088 | 0.000027  |
| Mg2                          | -1.210141         | 0.964880  | 0.000024  |
| Mg3                          | 4.084941          | 0.530153  | 0.000032  |
| Mg4                          | 6.916353          | -0.976473 | -0.000098 |
| Mg5                          | -4.085074         | -0.530402 | 0.000029  |
| Mg6                          | -6.915862         | 0.977346  | -0.000097 |
| Mg7                          | 1.701409          | 1.691951  | 1.501625  |
| Mg8                          | -1.701518         | -1.692152 | 1.501633  |
| Mg9                          | -1.701529         | -1.692151 | -1.501586 |
| Mg10                         | 1.701412          | 1.691936  | -1.501590 |
|                              |                   |           |           |
| @mg10-isomer53 bp86/6-31G(d) | Etot=-2000.826493 | Eb=-8.12  |           |
| Mg1                          | -0.098590         | -0.382877 | 0.000707  |
| Mg2                          | -2.589423         | -1.621481 | -1.487123 |
| Mg3                          | 2.959822          | 0.035756  | -0.000351 |
| Mg4                          | 5.550047          | -0.373073 | 1.652281  |
| Mg5                          | 5.301779          | 2.043635  | -0.250568 |
| Mg6                          | -2.590062         | -1.622512 | 1.486488  |
| Mg7                          | -2.867619         | 1.117056  | 0.000557  |
| Mg8                          | -5.457852         | -0.787446 | -0.000589 |
| Mg9                          | -5.803101         | 2.395558  | 0.000188  |
| Mg10                         | 5.595000          | -0.804615 | -1.401589 |
|                              |                   |           |           |
| @mg10-isomer54 bp86/6-31G(d) | Etot=-2000.825526 | Eb=-8.06  |           |
| Mg1                          | 4.931249          | 0.659186  | -1.493120 |
| Mg2                          | 2.753294          | -1.024154 | -0.000008 |
| Mg3                          | 2.304415          | 2.146913  | -0.000020 |
| Mg4                          | -3.240273         | -0.127260 | 0.000023  |
| Mg5                          | -5.786987         | 0.732593  | -1.542711 |
| Mg6                          | -0.154233         | 0.178226  | -0.000001 |
| Mg7                          | 5.787596          | -2.016756 | 0.000013  |
| Mg8                          | 4.931243          | 0.659225  | 1.493126  |
| Mg9                          | -5.739267         | -1.941979 | 0.000811  |
| Mg10                         | -5.787037         | 0.734006  | 1.541886  |
|                              |                   |           |           |
| @mg10-isomer55 bp86/6-31G(d) | Etot=-2000.823953 | Eb=-7.96  |           |
| Mg1                          | 3.317990          | -2.130926 | 0.002483  |
| Mg2                          | 5.262218          | -0.375193 | -1.541886 |
| Mg3                          | 0.233164          | -0.906248 | 0.001589  |
| Mg4                          | -2.538620         | 0.720103  | 0.000492  |
| Mg5                          | 5.264107          | -0.371497 | 1.540259  |
| Mg6                          | -5.500475         | -0.310252 | 0.000494  |
| Mg7                          | -8.762580         | -1.018789 | -0.000281 |
| Mg8                          | -0.051376         | 1.737780  | -1.497190 |
| Mg9                          | 2.826307          | 0.914112  | -0.000895 |
| Mg10                         | -0.050736         | 1.740910  | 1.494934  |
|                              |                   |           |           |
| @mg10-isomer56 bp86/6-31G(d) | Etot=-2000.820529 | Eb=-7.75  |           |
| Mg1                          | 1.398306          | -0.153684 | -0.000009 |
| Mg2                          | 4.351966          | -1.513287 | -0.006388 |
| Mg3                          | -3.935426         | -2.038585 | 1.531295  |
| Mg4                          | 4.008822          | 1.067435  | 1.508460  |
| Mg5                          | 4.007378          | 1.078387  | -1.502095 |
| Mg6                          | -4.536311         | 0.553279  | 0.000017  |
| Mg7                          | 6.927101          | 0.571570  | 0.000025  |
| Mg8                          | -6.609829         | 3.070485  | -0.000003 |

|                                                         |           |           |           |  |
|---------------------------------------------------------|-----------|-----------|-----------|--|
| Mg9                                                     | -3.935291 | -2.038480 | -1.531387 |  |
| Mg10                                                    | -1.676716 | -0.597120 | 0.000087  |  |
| @mg10-isomer57 bp86/6-31G(d) Etot=-2000.820091 Eb=-7.72 |           |           |           |  |
| Mg1                                                     | 4.360379  | 1.207778  | 0.045379  |  |
| Mg2                                                     | -0.872508 | 0.165813  | -0.098654 |  |
| Mg3                                                     | 1.148617  | 2.360573  | -0.884431 |  |
| Mg4                                                     | 1.445492  | 0.911159  | 1.802793  |  |
| Mg5                                                     | -3.941028 | -0.193788 | -0.044225 |  |
| Mg6                                                     | -6.830293 | 1.245339  | -0.052815 |  |
| Mg7                                                     | 5.024352  | -1.399185 | -1.474664 |  |
| Mg8                                                     | -6.570417 | -2.044615 | -0.026242 |  |
| Mg9                                                     | 4.217644  | -1.484472 | 1.522374  |  |
| Mg10                                                    | 2.017763  | -0.768602 | -0.789515 |  |
| @mg10-isomer58 bp86/6-31G(d) Etot=-2000.816297 Eb=-7.48 |           |           |           |  |
| Mg1                                                     | -0.784874 | -0.000089 | -0.515464 |  |
| Mg2                                                     | -3.872755 | 0.000093  | -0.093093 |  |
| Mg3                                                     | 2.039494  | -0.000269 | 1.278316  |  |
| Mg4                                                     | 1.671753  | 1.730017  | -1.162220 |  |
| Mg5                                                     | 4.671842  | -0.000264 | -0.279876 |  |
| Mg6                                                     | 3.917324  | 2.851094  | 0.657457  |  |
| Mg7                                                     | 3.916474  | -2.851215 | 0.658131  |  |
| Mg8                                                     | 1.672151  | -1.729436 | -1.162729 |  |
| Mg9                                                     | -6.851648 | -0.000584 | -1.317295 |  |
| Mg10                                                    | -6.379759 | 0.000652  | 1.936773  |  |
| @mg10-isomer59 bp86/6-31G(d) Etot=-2000.816186 Eb=-7.47 |           |           |           |  |
| Mg1                                                     | -8.560249 | 1.308147  | 0.182156  |  |
| Mg2                                                     | 2.744437  | -0.717666 | 2.176112  |  |
| Mg3                                                     | 6.776342  | 2.361787  | -0.396071 |  |
| Mg4                                                     | 0.815680  | 0.688750  | -0.064552 |  |
| Mg5                                                     | -2.236309 | 0.091315  | -0.044189 |  |
| Mg6                                                     | -5.288358 | 0.679347  | 0.067270  |  |
| Mg7                                                     | -0.314496 | -2.080895 | 0.930520  |  |
| Mg8                                                     | 3.922662  | 0.951571  | -0.108323 |  |
| Mg9                                                     | -0.558016 | -1.494967 | -2.057352 |  |
| Mg10                                                    | 2.698308  | -1.787390 | -0.685571 |  |
| @mg10-isomer60 bp86/6-31G(d) Etot=-2000.814879 Eb=-7.39 |           |           |           |  |
| Mg1                                                     | -1.252998 | -0.000253 | 1.436118  |  |
| Mg2                                                     | 1.183013  | 1.709251  | 0.000243  |  |
| Mg3                                                     | -1.673248 | -2.783768 | 0.000051  |  |
| Mg4                                                     | -3.586214 | 5.396016  | -0.000566 |  |
| Mg5                                                     | 3.707129  | 0.000735  | -0.000030 |  |
| Mg6                                                     | -1.674253 | 2.783295  | 0.000474  |  |
| Mg7                                                     | -3.583914 | -5.397437 | -0.000311 |  |
| Mg8                                                     | 6.949995  | 0.000950  | -0.000300 |  |
| Mg9                                                     | -1.253154 | -0.000083 | -1.435665 |  |
| Mg10                                                    | 1.183644  | -1.708706 | -0.000014 |  |
| @mg10-isomer61 bp86/6-31G(d) Etot=-2000.813077 Eb=-7.28 |           |           |           |  |
| Mg1                                                     | -0.811269 | -1.182570 | -0.000019 |  |
| Mg2                                                     | -0.029045 | 1.668073  | -1.438416 |  |
| Mg3                                                     | 2.072603  | -0.185823 | -0.000006 |  |
| Mg4                                                     | -0.029039 | 1.668058  | 1.438442  |  |
| Mg5                                                     | -3.012330 | 1.436303  | -0.000010 |  |
| Mg6                                                     | -1.497986 | 4.113142  | 0.000019  |  |
| Mg7                                                     | -3.851392 | -1.494102 | -0.000078 |  |
| Mg8                                                     | 5.141640  | -0.884563 | -0.000002 |  |
| Mg9                                                     | -6.391642 | -3.514263 | 0.000060  |  |
| Mg10                                                    | 8.408461  | -1.624255 | 0.000010  |  |
| @mg10-isomer62 bp86/6-31G(d) Etot=-2000.804205 Eb=-6.72 |           |           |           |  |

|      |           |           |           |
|------|-----------|-----------|-----------|
| Mg1  | 0.894516  | 2.208873  | 1.479680  |
| Mg2  | -1.321155 | 0.586966  | -0.000108 |
| Mg3  | 3.873080  | 1.822761  | 0.000226  |
| Mg4  | 0.894575  | 2.209387  | -1.479252 |
| Mg5  | -4.304688 | -0.279836 | -0.000086 |
| Mg6  | -6.959014 | -1.096676 | 1.638360  |
| Mg7  | 1.633186  | -0.471820 | -0.000239 |
| Mg8  | 4.676648  | -1.200938 | -0.000209 |
| Mg9  | 7.572199  | -2.682676 | -0.000065 |
| Mg10 | -6.959347 | -1.096042 | -1.638307 |

@mg10-isomer63 bp86/6-31G(d) Etot=-2000.796665 Eb=-6.25

|      |           |           |           |
|------|-----------|-----------|-----------|
| Mg1  | -2.196093 | 0.398696  | 1.451568  |
| Mg2  | 0.693420  | 0.605555  | -0.000047 |
| Mg3  | -4.690293 | -1.140221 | 0.000047  |
| Mg4  | 3.780175  | 0.009174  | -0.000006 |
| Mg5  | -6.869513 | -3.584061 | -0.000026 |
| Mg6  | -4.631340 | 1.965941  | 0.000032  |
| Mg7  | 6.983521  | -0.588880 | -0.000013 |
| Mg8  | -1.196359 | 3.075837  | -0.000036 |
| Mg9  | 10.322613 | -1.140702 | 0.000027  |
| Mg10 | -2.196131 | 0.398661  | -1.451546 |

@mg11-isomer01 bp86/6-31G(d) Etot=-2200.979169 Eb=-12.12

|      |           |           |           |
|------|-----------|-----------|-----------|
| Mg1  | 1.544175  | -0.015014 | -1.807974 |
| Mg2  | 0.000524  | -2.631538 | -1.490277 |
| Mg3  | -4.184842 | 0.000375  | -0.000138 |
| Mg4  | 0.000646  | 2.606435  | -1.533573 |
| Mg5  | -1.543926 | -0.014905 | -1.808640 |
| Mg6  | -0.000948 | 0.024734  | 3.023888  |
| Mg7  | -1.544561 | -1.558900 | 0.916496  |
| Mg8  | 1.543822  | 1.573760  | 0.891963  |
| Mg9  | 1.543682  | -1.558405 | 0.917582  |
| Mg10 | -1.543714 | 1.573688  | 0.890581  |
| Mg11 | 4.185143  | -0.000229 | 0.000091  |

@mg11-isomer02 bp86/6-31G(d) Etot=-2200.972785 Eb=-11.75

|      |           |           |           |
|------|-----------|-----------|-----------|
| Mg1  | 2.522791  | -1.694549 | 0.615443  |
| Mg2  | -0.535006 | -1.725558 | 0.627178  |
| Mg3  | 2.522690  | 1.380667  | 1.159272  |
| Mg4  | -0.534778 | 1.405982  | 1.181014  |
| Mg5  | 1.012045  | 2.851961  | -1.036689 |
| Mg6  | 1.011954  | -2.323616 | -1.951739 |
| Mg7  | -2.911506 | 0.000144  | 0.000708  |
| Mg8  | -0.535360 | 0.319634  | -1.807585 |
| Mg9  | 1.012794  | -0.528514 | 2.988018  |
| Mg10 | -6.087906 | -0.000113 | -0.000113 |
| Mg11 | 2.522283  | 0.313963  | -1.775506 |

@mg11-isomer03 bp86/6-31G(d) Etot=-2200.971643 Eb=-11.69

|      |           |           |           |
|------|-----------|-----------|-----------|
| Mg1  | 0.273300  | 1.192764  | -1.591504 |
| Mg2  | 2.514319  | -0.194644 | -0.000394 |
| Mg3  | -2.059442 | -0.505823 | -2.627744 |
| Mg4  | 0.461339  | -1.840243 | -1.555748 |
| Mg5  | -0.814258 | 3.493590  | 0.000650  |
| Mg6  | 5.704473  | 0.039276  | -0.000003 |
| Mg7  | -2.253927 | -2.034159 | -0.000037 |
| Mg8  | 0.461674  | -1.840830 | 1.555532  |
| Mg9  | -2.501922 | 1.004103  | 0.000136  |
| Mg10 | 0.273557  | 1.192196  | 1.591423  |
| Mg11 | -2.059113 | -0.506230 | 2.627687  |

@mg11-isomer04 bp86/6-31G(d) Etot=-2200.971201 Eb=-11.66

|     |          |          |          |
|-----|----------|----------|----------|
| Mg1 | 1.651459 | 1.114700 | 1.372063 |
|-----|----------|----------|----------|



|      |           |           |           |
|------|-----------|-----------|-----------|
| Mg2  | 1.040762  | 1.142748  | -1.704690 |
| Mg3  | 0.412253  | 3.530814  | 0.018088  |
| Mg4  | 0.980081  | -1.865819 | -1.768253 |
| Mg5  | -1.369735 | -1.871866 | 0.343824  |
| Mg6  | 3.575913  | -0.435661 | -0.617413 |
| Mg7  | 1.626387  | -1.935857 | 1.258838  |
| Mg8  | -1.407921 | 1.188243  | 0.470715  |
| Mg9  | -0.482593 | -0.467697 | 2.906084  |
| Mg10 | -1.639672 | -0.298683 | -2.208934 |
| Mg11 | -4.386933 | -0.100921 | -0.070324 |

@mg11-isomer05 bp86/6-31G(d) Etot=-2200.970553 Eb=-11.62

|      |           |           |           |
|------|-----------|-----------|-----------|
| Mg1  | 4.204375  | 0.858703  | 0.388738  |
| Mg2  | 1.965428  | -1.105996 | -0.160995 |
| Mg3  | -0.000074 | -3.300215 | -0.000176 |
| Mg4  | -1.965483 | -1.105946 | 0.160998  |
| Mg5  | 0.244908  | -1.063812 | 2.406436  |
| Mg6  | 1.695756  | 1.332856  | -1.913767 |
| Mg7  | -1.695699 | 1.332773  | 1.913928  |
| Mg8  | 1.187963  | 1.628107  | 1.126110  |
| Mg9  | -1.187878 | 1.628273  | -1.125925 |
| Mg10 | -0.245007 | -1.063560 | -2.406459 |
| Mg11 | -4.204289 | 0.858817  | -0.388888 |

@mg11-isomer06 bp86/6-31G(d) Etot=-2200.966341 Eb=-11.38

|      |           |           |           |
|------|-----------|-----------|-----------|
| Mg1  | -1.224769 | -0.145272 | -1.954697 |
| Mg2  | 1.063408  | -1.842566 | -0.614856 |
| Mg3  | 0.652582  | 2.040574  | 1.803478  |
| Mg4  | -1.766817 | -2.241373 | 0.253811  |
| Mg5  | -0.833670 | 2.822194  | -0.903386 |
| Mg6  | -1.892333 | 0.679472  | 0.986757  |
| Mg7  | 3.874415  | -0.838351 | -1.466386 |
| Mg8  | 0.143730  | -1.000058 | 2.513552  |
| Mg9  | 1.557077  | 1.128224  | -1.316880 |
| Mg10 | -4.359241 | -0.481846 | -0.569641 |
| Mg11 | 2.785618  | -0.120998 | 1.268248  |

@mg11-isomer07 bp86/6-31G(d) Etot=-2200.966049 Eb=-11.37

|      |           |           |           |
|------|-----------|-----------|-----------|
| Mg1  | 2.317663  | 2.690708  | 0.499653  |
| Mg2  | 2.733761  | -0.000115 | -0.652892 |
| Mg3  | 1.773206  | 0.000140  | 2.251767  |
| Mg4  | -0.395438 | 1.666918  | 0.755305  |
| Mg5  | 0.622309  | 1.572714  | -2.193726 |
| Mg6  | 2.317643  | -2.690777 | 0.500010  |
| Mg7  | 0.622266  | -1.572864 | -2.193724 |
| Mg8  | -0.395351 | -1.666669 | 0.755282  |
| Mg9  | -2.592714 | 0.000036  | 1.812610  |
| Mg10 | -1.897577 | 0.000022  | -1.350124 |
| Mg11 | -5.105769 | -0.000113 | -0.184161 |

@mg11-isomer08 bp86/6-31G(d) Etot=-2200.965980 Eb=-11.36

|      |           |           |           |
|------|-----------|-----------|-----------|
| Mg1  | -0.645690 | -0.548314 | -3.001067 |
| Mg2  | 0.352901  | 1.701299  | -1.445873 |
| Mg3  | -5.100926 | 0.000106  | -0.000029 |
| Mg4  | 0.352306  | -2.102744 | -0.750681 |
| Mg5  | -0.646548 | 2.873012  | 1.024860  |
| Mg6  | 2.606684  | -1.354184 | 1.151556  |
| Mg7  | 2.607275  | 1.673410  | 0.598158  |
| Mg8  | 2.608112  | -0.319716 | -1.747092 |
| Mg9  | 0.351296  | 0.401435  | 2.196181  |
| Mg10 | -1.838151 | 0.000203  | -0.000766 |
| Mg11 | -0.647258 | -2.324507 | 1.974755  |

@mg11-isomer09 bp86/6-31G(d) Etot=-2200.964741 Eb=-11.29

|      |           |           |           |
|------|-----------|-----------|-----------|
| Mg1  | -1.939463 | 2.015935  | -1.791128 |
| Mg2  | 1.046578  | 1.480416  | -1.145337 |
| Mg3  | -1.168293 | -0.775111 | -1.320361 |
| Mg4  | -1.046576 | 1.480349  | 1.145340  |
| Mg5  | -1.738193 | -1.396646 | 1.918900  |
| Mg6  | 0.000059  | -3.200455 | -0.000060 |
| Mg7  | 1.939435  | 2.015936  | 1.791155  |
| Mg8  | 1.738227  | -1.396574 | -1.919032 |
| Mg9  | 1.168368  | -0.775179 | 1.320521  |
| Mg10 | -3.883594 | 0.275630  | 0.124189  |
| Mg11 | 3.883452  | 0.275699  | -0.124187 |

@mg11-isomer10 bp86/6-31G(d) Etot=-2200.962744 Eb=-11.18

|      |           |           |           |
|------|-----------|-----------|-----------|
| Mg1  | 1.063830  | 1.519116  | -0.487346 |
| Mg2  | -1.063758 | -1.519558 | -0.486318 |
| Mg3  | -2.016934 | 1.492594  | 0.507772  |
| Mg4  | 2.016886  | -1.492185 | 0.509007  |
| Mg5  | 0.249596  | 2.985873  | 1.983224  |
| Mg6  | -0.000090 | 0.000954  | 2.387462  |
| Mg7  | -4.071306 | -0.398347 | -0.764473 |
| Mg8  | -0.249785 | -2.984275 | 1.985572  |
| Mg9  | 1.415852  | -0.687502 | -2.434833 |
| Mg10 | -1.415748 | 0.685651  | -2.435435 |
| Mg11 | 4.071456  | 0.397679  | -0.764632 |

@mg11-isomer11 bp86/6-31G(d) Etot=-2200.962013 Eb=-11.14

|      |           |           |           |
|------|-----------|-----------|-----------|
| Mg1  | 0.330033  | -0.000039 | 1.054792  |
| Mg2  | 1.015234  | 2.531241  | -0.967123 |
| Mg3  | 2.797493  | -0.000100 | -1.072960 |
| Mg4  | 1.015239  | -2.531460 | -0.966519 |
| Mg5  | 2.851583  | -1.568758 | 1.536303  |
| Mg6  | -1.881696 | -1.578957 | -0.436855 |
| Mg7  | -1.881625 | 1.578790  | -0.437374 |
| Mg8  | -2.481067 | 0.000443  | 2.202737  |
| Mg9  | 2.851426  | 1.569221  | 1.535941  |
| Mg10 | 0.030113  | -0.000351 | -2.502407 |
| Mg11 | -4.646731 | -0.000030 | 0.053466  |

@mg11-isomer12 bp86/6-31G(d) Etot=-2200.960516 Eb=-11.05

|      |           |           |           |
|------|-----------|-----------|-----------|
| Mg1  | 3.220196  | 1.765244  | 0.310933  |
| Mg2  | 1.999156  | -0.862380 | 1.045920  |
| Mg3  | 0.591837  | 1.634938  | 2.179906  |
| Mg4  | 2.858923  | -0.255496 | -2.025215 |
| Mg5  | 0.560734  | 1.400009  | -1.102294 |
| Mg6  | -1.208739 | -0.669074 | 1.128973  |
| Mg7  | -4.573683 | 0.051002  | -0.066953 |
| Mg8  | 0.214617  | -3.244232 | 1.484688  |
| Mg9  | -1.983101 | 2.112733  | 0.372986  |
| Mg10 | 0.310531  | -1.963976 | -1.356394 |
| Mg11 | -1.990471 | 0.031233  | -1.972550 |

@mg11-isomer13 bp86/6-31G(d) Etot=-2200.959324 Eb=-10.98

|      |           |           |           |
|------|-----------|-----------|-----------|
| Mg1  | 2.278225  | -1.559513 | -1.737890 |
| Mg2  | 4.544370  | -0.022858 | -0.158030 |
| Mg3  | 1.428363  | 1.203961  | -0.876311 |
| Mg4  | 1.810007  | -1.040041 | 1.293610  |
| Mg5  | -0.587129 | -1.498387 | -0.622872 |
| Mg6  | -0.036234 | 3.578365  | 0.342502  |
| Mg7  | -0.927391 | -1.800231 | 2.533200  |
| Mg8  | -0.516652 | 1.083820  | 1.921686  |
| Mg9  | -3.080917 | -0.979700 | -2.252320 |
| Mg10 | -1.717373 | 1.520634  | -1.204443 |
| Mg11 | -3.195270 | -0.486050 | 0.760867  |

@mg11-isomer14 bp86/6-31G(d) Etot=-2200.958725 Eb=-10.95

|      |           |           |           |
|------|-----------|-----------|-----------|
| Mg1  | 1.089197  | 0.000043  | 2.452550  |
| Mg2  | -0.029698 | 2.562493  | 1.078823  |
| Mg3  | 2.810990  | -1.555305 | 0.217798  |
| Mg4  | -0.029746 | -2.562453 | 1.078902  |
| Mg5  | 2.811021  | 1.555324  | 0.217701  |
| Mg6  | -4.620554 | -0.000029 | -0.311830 |
| Mg7  | 3.245130  | -0.000115 | -2.367212 |
| Mg8  | 0.520701  | 0.000039  | -1.127996 |
| Mg9  | -2.046218 | 1.590511  | -1.296198 |
| Mg10 | -2.046190 | -1.590511 | -1.296171 |
| Mg11 | -1.704635 | 0.000005  | 1.353634  |

@mg11-isomer15 bp86/6-31G(d) Etot=-2200.957278 Eb=-10.87

|      |           |           |           |
|------|-----------|-----------|-----------|
| Mg1  | -0.998891 | 0.000119  | -1.548712 |
| Mg2  | -3.697826 | -1.511876 | -0.000143 |
| Mg3  | -3.697621 | 1.512027  | -0.000057 |
| Mg4  | -0.998796 | 0.000035  | 1.549021  |
| Mg5  | 1.763207  | 1.676013  | -1.535266 |
| Mg6  | 1.763094  | -1.676176 | 1.535129  |
| Mg7  | 3.858502  | -0.000136 | -0.000082 |
| Mg8  | 1.763268  | 1.676012  | 1.535106  |
| Mg9  | 1.762967  | -1.676109 | -1.535195 |
| Mg10 | -0.758808 | 2.630613  | 0.000149  |
| Mg11 | -0.759096 | -2.630522 | 0.000049  |

@mg11-isomer16 bp86/6-31G(d) Etot=-2200.956095 Eb=-10.80

|      |           |           |           |
|------|-----------|-----------|-----------|
| Mg1  | -0.716506 | 1.093847  | -1.519517 |
| Mg2  | -0.716121 | 0.768858  | 1.707393  |
| Mg3  | 1.979451  | 1.881758  | 0.189641  |
| Mg4  | -0.716091 | -1.863623 | -0.187417 |
| Mg5  | 1.844473  | 1.428679  | 3.172660  |
| Mg6  | 1.844053  | 2.033494  | -2.823678 |
| Mg7  | 1.979575  | -0.776183 | -1.724289 |
| Mg8  | 1.845197  | -3.461606 | -0.349277 |
| Mg9  | -6.245628 | 0.000142  | -0.000001 |
| Mg10 | -3.078397 | -0.000652 | 0.000185  |
| Mg11 | 1.979993  | -1.104714 | 1.534299  |

@mg11-isomer17 bp86/6-31G(d) Etot=-2200.954692 Eb=-10.72

|      |           |           |           |
|------|-----------|-----------|-----------|
| Mg1  | -0.979842 | -0.341520 | -1.257050 |
| Mg2  | 2.062182  | 0.669750  | -1.602104 |
| Mg3  | -3.932236 | -1.073552 | -0.135092 |
| Mg4  | -0.000012 | 2.440004  | -0.000040 |
| Mg5  | -2.062038 | 0.669713  | 1.602087  |
| Mg6  | -1.255831 | -2.458305 | 0.994017  |
| Mg7  | 3.164314  | 1.983718  | 0.881427  |
| Mg8  | 1.255856  | -2.458302 | -0.994101 |
| Mg9  | 0.979886  | -0.341689 | 1.257053  |
| Mg10 | -3.164473 | 1.983677  | -0.881335 |
| Mg11 | 3.932194  | -1.073493 | 0.135139  |

@mg11-isomer18 bp86/6-31G(d) Etot=-2200.953208 Eb=-10.64

|      |           |           |           |
|------|-----------|-----------|-----------|
| Mg1  | 0.560279  | 0.039680  | -0.000077 |
| Mg2  | 3.176222  | 0.373815  | -1.537858 |
| Mg3  | 0.759182  | -1.504050 | 2.660508  |
| Mg4  | -1.602209 | 2.281094  | -0.000327 |
| Mg5  | -1.960156 | -0.313983 | 1.714187  |
| Mg6  | 1.680498  | 2.752079  | -0.000537 |
| Mg7  | -1.960139 | -0.314385 | -1.714187 |
| Mg8  | -0.190620 | -2.833053 | 0.000596  |
| Mg9  | -4.398359 | 0.649452  | -0.000102 |
| Mg10 | 3.176177  | 0.374555  | 1.537728  |
| Mg11 | 0.759124  | -1.505205 | -2.659931 |

@mg11-isomer19 bp86/6-31G(d) Etot=-2200.952052 Eb=-10.57

|      |           |           |           |
|------|-----------|-----------|-----------|
| Mg1  | -0.367957 | -0.538395 | 1.452204  |
| Mg2  | -2.681514 | 1.743837  | 0.405453  |
| Mg3  | 0.294740  | -2.465955 | -0.850918 |
| Mg4  | -0.368151 | 0.538437  | -1.452399 |
| Mg5  | -2.680959 | -1.743863 | -0.405556 |
| Mg6  | 2.344913  | -2.201900 | 1.420705  |
| Mg7  | -5.046654 | -0.000444 | 0.000135  |
| Mg8  | 2.344836  | 2.201953  | -1.420598 |
| Mg9  | 2.932946  | 0.865955  | 1.276485  |
| Mg10 | 0.294217  | 2.466120  | 0.850533  |
| Mg11 | 2.933584  | -0.865744 | -1.276045 |

@mg11-isomer20 bp86/6-31G(d) Etot=-2200.951423 Eb=-10.53

|      |           |           |           |
|------|-----------|-----------|-----------|
| Mg1  | -0.523084 | -0.000014 | 1.158405  |
| Mg2  | 1.984103  | -2.137854 | 0.488846  |
| Mg3  | -3.475596 | 1.493406  | -0.149711 |
| Mg4  | -1.042679 | 2.938955  | 1.139953  |
| Mg5  | -1.042538 | -2.938984 | 1.140005  |
| Mg6  | -3.475491 | -1.493487 | -0.149697 |
| Mg7  | 1.984003  | 2.137900  | 0.488921  |
| Mg8  | -0.460057 | -1.657875 | -1.507062 |
| Mg9  | -0.460069 | 1.657844  | -1.507061 |
| Mg10 | 2.348180  | 0.000038  | -1.766444 |
| Mg11 | 4.163228  | 0.000070  | 0.663846  |

@mg11-isomer21 bp86/6-31G(d) Etot=-2200.951349 Eb=-10.53

|      |           |           |           |
|------|-----------|-----------|-----------|
| Mg1  | -1.651422 | -2.679504 | -0.416900 |
| Mg2  | 0.956799  | -2.651442 | 1.393538  |
| Mg3  | -0.058260 | 1.720478  | -1.330414 |
| Mg4  | -3.111380 | 1.801134  | -0.369573 |
| Mg5  | -4.176325 | -0.980337 | -0.270602 |
| Mg6  | -0.725957 | 2.775300  | 1.451236  |
| Mg7  | 0.920524  | -1.380353 | -1.381102 |
| Mg8  | -0.882894 | -0.196415 | 1.100242  |
| Mg9  | 3.014939  | 0.916450  | -1.755531 |
| Mg10 | 2.187720  | 1.724454  | 1.014967  |
| Mg11 | 3.526254  | -1.049764 | 0.564139  |

@mg11-isomer22 bp86/6-31G(d) Etot=-2200.950094 Eb=-10.46

|      |           |           |           |
|------|-----------|-----------|-----------|
| Mg1  | 1.297092  | 1.601728  | -0.485864 |
| Mg2  | 0.297514  | -1.494975 | -1.285658 |
| Mg3  | 4.150331  | 1.416905  | 0.718017  |
| Mg4  | -0.971779 | -0.001117 | 1.246023  |
| Mg5  | -0.632586 | -2.973196 | 1.230575  |
| Mg6  | 2.131208  | -1.093379 | 1.256000  |
| Mg7  | -1.601388 | 1.068057  | -1.679578 |
| Mg8  | -2.877407 | -1.808966 | -0.675401 |
| Mg9  | -1.349556 | 2.940716  | 0.708988  |
| Mg10 | 3.506685  | -0.701569 | -1.396296 |
| Mg11 | -3.950115 | 1.045798  | 0.363194  |

@mg11-isomer23 bp86/6-31G(d) Etot=-2200.949547 Eb=-10.43

|      |           |           |           |
|------|-----------|-----------|-----------|
| Mg1  | -1.769972 | 1.525710  | 0.814825  |
| Mg2  | 1.270430  | 1.926481  | 1.655517  |
| Mg3  | -1.941714 | -0.638848 | -1.489505 |
| Mg4  | 0.655434  | 1.310297  | -1.230292 |
| Mg5  | 3.116718  | -0.337589 | 0.125078  |
| Mg6  | -0.048589 | -1.126962 | 0.987702  |
| Mg7  | -4.516772 | 1.127926  | -0.511695 |
| Mg8  | 3.369870  | 2.643071  | -0.531500 |
| Mg9  | 1.056481  | -1.977319 | -1.738738 |
| Mg10 | -3.470160 | -1.317323 | 1.068632  |

|                                                          |           |           |           |
|----------------------------------------------------------|-----------|-----------|-----------|
| Mg11                                                     | 2.278274  | -3.135443 | 0.849978  |
| @mg11-isomer24 bp86/6-31G(d) Etot=-2200.949192 Eb=-10.41 |           |           |           |
| Mg1                                                      | -0.190674 | 1.888091  | 1.346198  |
| Mg2                                                      | -1.303908 | 0.457103  | -1.285998 |
| Mg3                                                      | -3.453136 | 1.653390  | 0.487928  |
| Mg4                                                      | 4.220462  | -1.358650 | 0.114995  |
| Mg5                                                      | 2.977559  | 1.482798  | 0.591351  |
| Mg6                                                      | -0.510242 | -2.589434 | -0.668078 |
| Mg7                                                      | -1.752084 | -0.881246 | 1.543543  |
| Mg8                                                      | 1.749541  | -0.540029 | -1.538713 |
| Mg9                                                      | -3.950756 | -1.395459 | -0.613406 |
| Mg10                                                     | 0.885186  | 2.604887  | -1.402983 |
| Mg11                                                     | 1.328053  | -1.321451 | 1.425163  |
| @mg11-isomer25 bp86/6-31G(d) Etot=-2200.948905 Eb=-10.39 |           |           |           |
| Mg1                                                      | 1.852098  | 0.477198  | -1.345505 |
| Mg2                                                      | -1.376244 | -0.500360 | -1.356207 |
| Mg3                                                      | -4.528434 | -1.165099 | -0.339236 |
| Mg4                                                      | -0.494507 | 2.550854  | -1.135528 |
| Mg5                                                      | 3.711069  | -2.081516 | -0.992556 |
| Mg6                                                      | 3.141415  | -0.171013 | 1.347274  |
| Mg7                                                      | -3.191824 | 1.537908  | 0.324750  |
| Mg8                                                      | -0.081291 | 0.673164  | 1.247510  |
| Mg9                                                      | 0.858617  | -2.237595 | 0.173640  |
| Mg10                                                     | 2.123220  | 2.756682  | 0.761065  |
| Mg11                                                     | -2.014120 | -1.840222 | 1.314792  |
| @mg11-isomer26 bp86/6-31G(d) Etot=-2200.948903 Eb=-10.39 |           |           |           |
| Mg1                                                      | -0.887889 | 2.469068  | -0.337475 |
| Mg2                                                      | -0.097686 | 0.221249  | 1.591002  |
| Mg3                                                      | 3.429198  | -0.152150 | 1.033809  |
| Mg4                                                      | 1.680209  | 1.043651  | -1.231067 |
| Mg5                                                      | -3.820124 | 1.534435  | -0.987019 |
| Mg6                                                      | 1.339682  | -2.219547 | 0.041832  |
| Mg7                                                      | -4.152976 | -1.239310 | 0.231191  |
| Mg8                                                      | 3.500520  | -1.241183 | -1.882694 |
| Mg9                                                      | -1.236866 | -0.609434 | -1.171909 |
| Mg10                                                     | -1.493918 | -2.450789 | 1.257198  |
| Mg11                                                     | 1.739852  | 2.644010  | 1.455131  |
| @mg11-isomer27 bp86/6-31G(d) Etot=-2200.947679 Eb=-10.32 |           |           |           |
| Mg1                                                      | -3.442055 | -1.779548 | 0.488111  |
| Mg2                                                      | -1.397364 | 0.972845  | 1.008800  |
| Mg3                                                      | 2.794297  | -1.335452 | -1.323546 |
| Mg4                                                      | 0.618974  | 1.226383  | -1.374464 |
| Mg5                                                      | -2.401486 | 0.050442  | -1.749101 |
| Mg6                                                      | -0.242397 | -1.812443 | -0.409381 |
| Mg7                                                      | 1.124460  | 2.914224  | 1.133122  |
| Mg8                                                      | -4.543085 | 1.125100  | 0.234121  |
| Mg9                                                      | 2.125428  | -3.085114 | 1.116464  |
| Mg10                                                     | 1.806442  | -0.085588 | 1.348050  |
| Mg11                                                     | 3.556785  | 1.809152  | -0.472176 |
| @mg11-isomer28 bp86/6-31G(d) Etot=-2200.946740 Eb=-10.27 |           |           |           |
| Mg1                                                      | -1.209714 | -2.611405 | 0.873708  |
| Mg2                                                      | -0.138286 | 0.000642  | 2.020178  |
| Mg3                                                      | 3.007800  | 0.000592  | 2.179972  |
| Mg4                                                      | 1.505112  | -1.744917 | -0.227770 |
| Mg5                                                      | -3.857733 | -1.537497 | -0.397630 |
| Mg6                                                      | 1.505203  | 1.744708  | -0.228586 |
| Mg7                                                      | -3.857856 | 1.537177  | -0.397978 |
| Mg8                                                      | 3.864004  | -0.000313 | -0.861644 |
| Mg9                                                      | -1.091705 | -0.000245 | -0.957218 |

|                                                          |           |           |           |  |
|----------------------------------------------------------|-----------|-----------|-----------|--|
| Mg10                                                     | -1.209665 | 2.611981  | 0.872219  |  |
| Mg11                                                     | 1.482840  | -0.000723 | -2.875251 |  |
| @mg11-isomer29 bp86/6-31G(d) Etot=-2200.945397 Eb=-10.19 |           |           |           |  |
| Mg1                                                      | -3.327321 | 2.118718  | -0.324275 |  |
| Mg2                                                      | -0.366160 | -2.555755 | 0.582558  |  |
| Mg3                                                      | -3.327249 | -2.118865 | -0.324242 |  |
| Mg4                                                      | 2.874354  | -2.970310 | 0.750897  |  |
| Mg5                                                      | -1.109082 | -0.000034 | -1.239262 |  |
| Mg6                                                      | 1.632061  | 1.617497  | -1.712748 |  |
| Mg7                                                      | 1.415178  | 0.000028  | 0.980226  |  |
| Mg8                                                      | 2.874208  | 2.970392  | 0.750928  |  |
| Mg9                                                      | -1.931850 | -0.000027 | 1.666094  |  |
| Mg10                                                     | -0.366285 | 2.555746  | 0.582573  |  |
| Mg11                                                     | 1.632146  | -1.617388 | -1.712749 |  |
| @mg11-isomer30 bp86/6-31G(d) Etot=-2200.945197 Eb=-10.18 |           |           |           |  |
| Mg1                                                      | 2.283249  | 3.259014  | -0.550159 |  |
| Mg2                                                      | -0.140612 | 2.480767  | 1.493284  |  |
| Mg3                                                      | -3.136139 | 1.413067  | 0.176885  |  |
| Mg4                                                      | 2.133840  | 0.505329  | 0.656996  |  |
| Mg5                                                      | -0.236423 | 1.464068  | -1.329849 |  |
| Mg6                                                      | -0.976449 | -0.717600 | 1.007406  |  |
| Mg7                                                      | -4.228251 | -1.537461 | 0.561532  |  |
| Mg8                                                      | 1.658016  | -2.438707 | 1.490264  |  |
| Mg9                                                      | -2.299470 | -0.959578 | -1.743026 |  |
| Mg10                                                     | 4.055744  | -1.792952 | -0.395432 |  |
| Mg11                                                     | 0.886495  | -1.675946 | -1.367901 |  |
| @mg11-isomer31 bp86/6-31G(d) Etot=-2200.945192 Eb=-10.18 |           |           |           |  |
| Mg1                                                      | -1.781471 | -1.083281 | -1.093930 |  |
| Mg2                                                      | -2.406817 | -0.057474 | 1.706078  |  |
| Mg3                                                      | 2.237291  | 2.889716  | 1.309189  |  |
| Mg4                                                      | 0.321370  | -1.868552 | 1.166904  |  |
| Mg5                                                      | -3.363433 | 1.832931  | -0.564924 |  |
| Mg6                                                      | 2.448039  | 2.024604  | -1.634795 |  |
| Mg7                                                      | -4.778523 | -0.859663 | -0.120763 |  |
| Mg8                                                      | 3.029928  | -3.038050 | 0.172281  |  |
| Mg9                                                      | 3.026236  | 0.036919  | 0.686369  |  |
| Mg10                                                     | -0.075463 | 1.342246  | 0.025977  |  |
| Mg11                                                     | 1.342843  | -1.219395 | -1.652386 |  |
| @mg11-isomer32 bp86/6-31G(d) Etot=-2200.944921 Eb=-10.16 |           |           |           |  |
| Mg1                                                      | -0.303885 | -0.236971 | -0.505917 |  |
| Mg2                                                      | -0.966483 | 2.081438  | 1.692212  |  |
| Mg3                                                      | 2.091323  | 1.430123  | 1.030924  |  |
| Mg4                                                      | 2.653329  | 0.343059  | -1.749206 |  |
| Mg5                                                      | 2.116688  | -2.223853 | 0.233457  |  |
| Mg6                                                      | -3.107591 | 1.583598  | -0.512317 |  |
| Mg7                                                      | -0.952955 | -3.016718 | 0.218739  |  |
| Mg8                                                      | -3.261201 | -1.447737 | -1.307902 |  |
| Mg9                                                      | 0.042347  | 2.669836  | -1.149186 |  |
| Mg10                                                     | 4.479838  | -0.459878 | 0.494094  |  |
| Mg11                                                     | -2.791409 | -0.722897 | 1.555101  |  |
| @mg11-isomer33 bp86/6-31G(d) Etot=-2200.944805 Eb=-10.16 |           |           |           |  |
| Mg1                                                      | 0.000025  | -1.140136 | -1.225870 |  |
| Mg2                                                      | -2.689059 | -2.603043 | -0.342008 |  |
| Mg3                                                      | 2.689071  | -2.603009 | -0.342080 |  |
| Mg4                                                      | 1.652192  | -0.059730 | 1.339470  |  |
| Mg5                                                      | 0.000062  | -2.757107 | 1.389225  |  |
| Mg6                                                      | -2.572439 | 0.644130  | -1.506782 |  |
| Mg7                                                      | -3.023827 | 2.919121  | 0.583334  |  |
| Mg8                                                      | -1.652091 | -0.059749 | 1.339487  |  |

|                                                          |           |           |           |
|----------------------------------------------------------|-----------|-----------|-----------|
| Mg9                                                      | -0.000034 | 2.096055  | -0.311332 |
| Mg10                                                     | 3.023698  | 2.919182  | 0.583408  |
| Mg11                                                     | 2.572402  | 0.644286  | -1.506852 |
| @mg11-isomer34 bp86/6-31G(d) Etot=-2200.944316 Eb=-10.13 |           |           |           |
| Mg1                                                      | -0.253965 | 2.113001  | -0.895719 |
| Mg2                                                      | -1.867448 | -0.612741 | -1.571782 |
| Mg3                                                      | -3.510614 | 1.970506  | -0.536870 |
| Mg4                                                      | 1.300465  | 1.752931  | 1.775421  |
| Mg5                                                      | -1.530535 | -2.803263 | 0.572084  |
| Mg6                                                      | 3.680544  | -0.480263 | 1.422892  |
| Mg7                                                      | -1.441814 | 0.368178  | 1.323053  |
| Mg8                                                      | 0.991380  | -1.113742 | -0.125248 |
| Mg9                                                      | 2.969585  | 1.419217  | -0.871683 |
| Mg10                                                     | 3.824430  | -1.496377 | -1.457840 |
| Mg11                                                     | -4.162028 | -1.117449 | 0.365694  |
| @mg11-isomer35 bp86/6-31G(d) Etot=-2200.943623 Eb=-10.09 |           |           |           |
| Mg1                                                      | -3.323291 | 0.386242  | 1.721824  |
| Mg2                                                      | -2.594704 | 1.024892  | -1.164300 |
| Mg3                                                      | 1.121675  | -2.341680 | -0.116941 |
| Mg4                                                      | -0.127819 | 0.567250  | 0.866676  |
| Mg5                                                      | -1.911700 | -1.930226 | 0.047736  |
| Mg6                                                      | 4.104097  | -2.079618 | -0.776160 |
| Mg7                                                      | -4.792696 | -1.145982 | -0.470008 |
| Mg8                                                      | 2.153747  | 2.674912  | 0.982225  |
| Mg9                                                      | 2.253697  | 0.481315  | -1.262155 |
| Mg10                                                     | 0.067992  | 2.702341  | -1.400365 |
| Mg11                                                     | 3.049002  | -0.339444 | 1.571468  |
| @mg11-isomer36 bp86/6-31G(d) Etot=-2200.943252 Eb=-10.07 |           |           |           |
| Mg1                                                      | -1.596652 | 1.457028  | -1.581331 |
| Mg2                                                      | -1.596893 | 1.457132  | 1.581048  |
| Mg3                                                      | -5.457336 | -2.421795 | -0.000022 |
| Mg4                                                      | -0.000333 | 3.567644  | -0.000100 |
| Mg5                                                      | -2.631595 | -0.979282 | -0.000160 |
| Mg6                                                      | 1.596463  | 1.457464  | 1.581322  |
| Mg7                                                      | 0.000336  | -1.297571 | -1.573402 |
| Mg8                                                      | 1.596719  | 1.457387  | -1.581096 |
| Mg9                                                      | 0.000048  | -1.297499 | 1.573615  |
| Mg10                                                     | 2.631886  | -0.978698 | 0.000286  |
| Mg11                                                     | 5.457358  | -2.421811 | -0.000159 |
| @mg11-isomer37 bp86/6-31G(d) Etot=-2200.942870 Eb=-10.05 |           |           |           |
| Mg1                                                      | 0.550910  | 1.595596  | 0.057868  |
| Mg2                                                      | 3.144918  | 2.456078  | -1.358166 |
| Mg3                                                      | -3.969278 | -1.347355 | -0.549927 |
| Mg4                                                      | -4.571690 | 1.532699  | 0.633235  |
| Mg5                                                      | -0.364963 | -1.503366 | -0.977458 |
| Mg6                                                      | -2.259882 | 1.162808  | -1.353002 |
| Mg7                                                      | 2.928206  | -0.554225 | -0.785907 |
| Mg8                                                      | 1.170686  | -1.286623 | 1.698811  |
| Mg9                                                      | 3.238966  | 1.494498  | 1.576803  |
| Mg10                                                     | -1.839103 | -0.110623 | 1.402115  |
| Mg11                                                     | 1.971229  | -3.439487 | -0.344372 |
| @mg11-isomer38 bp86/6-31G(d) Etot=-2200.942491 Eb=-10.02 |           |           |           |
| Mg1                                                      | -3.847324 | 2.034173  | -1.197840 |
| Mg2                                                      | -1.529841 | -0.056230 | -1.269368 |
| Mg3                                                      | -3.624006 | -0.231528 | 0.987247  |
| Mg4                                                      | -2.089431 | -2.966486 | -0.054266 |
| Mg5                                                      | -1.633800 | 2.201471  | 0.924574  |
| Mg6                                                      | 0.899256  | -1.905911 | -0.993772 |
| Mg7                                                      | 1.236235  | 1.317645  | -0.115986 |

|                                                         |           |           |           |
|---------------------------------------------------------|-----------|-----------|-----------|
| Mg8                                                     | -0.437293 | -0.976470 | 1.556806  |
| Mg9                                                     | 4.345709  | 1.775877  | 0.533901  |
| Mg10                                                    | 3.015477  | -0.940296 | 1.257796  |
| Mg11                                                    | 3.665018  | -0.252245 | -1.629093 |
| @mg11-isomer39 bp86/6-31G(d) Etot=-2200.941653 Eb=-9.98 |           |           |           |
| Mg1                                                     | -1.992321 | -3.513968 | -0.258363 |
| Mg2                                                     | -0.390155 | -1.643126 | 1.676536  |
| Mg3                                                     | 2.890517  | -0.947280 | 1.172925  |
| Mg4                                                     | -2.009658 | -0.544812 | -0.821429 |
| Mg5                                                     | 0.811207  | -1.925879 | -1.093798 |
| Mg6                                                     | 0.963509  | 1.169799  | -0.032573 |
| Mg7                                                     | 4.141355  | 1.891434  | 0.583809  |
| Mg8                                                     | -1.637952 | 2.539916  | -1.193566 |
| Mg9                                                     | 3.332194  | -0.005979 | -1.665767 |
| Mg10                                                    | -4.368253 | 1.533667  | -0.013545 |
| Mg11                                                    | -1.740444 | 1.446228  | 1.645773  |
| @mg11-isomer40 bp86/6-31G(d) Etot=-2200.941612 Eb=-9.97 |           |           |           |
| Mg1                                                     | 1.237406  | -2.474131 | 1.730754  |
| Mg2                                                     | 3.173948  | -2.782684 | -0.715509 |
| Mg3                                                     | 1.659473  | -0.000066 | 0.000138  |
| Mg4                                                     | -0.216012 | -2.308803 | -1.013299 |
| Mg5                                                     | -1.413662 | -0.699869 | 1.399081  |
| Mg6                                                     | 3.174208  | 2.782561  | 0.715471  |
| Mg7                                                     | -3.611806 | -1.438299 | -0.647085 |
| Mg8                                                     | -1.413617 | 0.700018  | -1.399059 |
| Mg9                                                     | -3.611802 | 1.438527  | 0.647042  |
| Mg10                                                    | 1.237692  | 2.473854  | -1.730802 |
| Mg11                                                    | -0.215827 | 2.308893  | 1.013268  |
| @mg11-isomer41 bp86/6-31G(d) Etot=-2200.940797 Eb=-9.93 |           |           |           |
| Mg1                                                     | -3.744955 | -2.251882 | 0.000069  |
| Mg2                                                     | -2.167711 | 0.000036  | 1.446614  |
| Mg3                                                     | -0.647720 | 2.738388  | 0.000005  |
| Mg4                                                     | 3.595606  | -0.000035 | 1.465763  |
| Mg5                                                     | 2.558092  | -2.572003 | 0.000044  |
| Mg6                                                     | -2.167803 | -0.000079 | -1.446575 |
| Mg7                                                     | -3.744920 | 2.251869  | -0.000044 |
| Mg8                                                     | 3.595611  | -0.000030 | -1.465791 |
| Mg9                                                     | 0.813368  | 0.000036  | -0.000042 |
| Mg10                                                    | 2.558145  | 2.571981  | 0.000015  |
| Mg11                                                    | -0.647713 | -2.738281 | -0.000057 |
| @mg11-isomer42 bp86/6-31G(d) Etot=-2200.940623 Eb=-9.92 |           |           |           |
| Mg1                                                     | -0.498977 | -1.589706 | 1.573989  |
| Mg2                                                     | -2.939454 | -2.621995 | 0.000051  |
| Mg3                                                     | -3.276758 | -0.000016 | -1.583418 |
| Mg4                                                     | 1.629906  | -0.000017 | -0.000005 |
| Mg5                                                     | 4.730423  | -0.000055 | 0.000044  |
| Mg6                                                     | -0.498964 | -1.589795 | -1.573972 |
| Mg7                                                     | -0.498954 | 1.589700  | -1.574022 |
| Mg8                                                     | -0.498944 | 1.589777  | 1.573966  |
| Mg9                                                     | -2.939403 | 2.622022  | -0.000046 |
| Mg10                                                    | -3.276764 | 0.000053  | 1.583431  |
| Mg11                                                    | 8.067889  | 0.000034  | -0.000018 |
| @mg11-isomer43 bp86/6-31G(d) Etot=-2200.940326 Eb=-9.90 |           |           |           |
| Mg1                                                     | 2.691197  | 2.693899  | -0.048940 |
| Mg2                                                     | 1.351183  | 0.000010  | -1.327570 |
| Mg3                                                     | -0.443591 | 1.853687  | 0.455890  |
| Mg4                                                     | 1.962059  | -0.000009 | 1.546622  |
| Mg5                                                     | -2.285473 | 0.000010  | -1.482531 |
| Mg6                                                     | -3.326767 | 2.785731  | -0.239480 |



|                                                         |           |           |           |
|---------------------------------------------------------|-----------|-----------|-----------|
| Mg7                                                     | 4.371929  | 0.000024  | -0.334254 |
| Mg8                                                     | -3.241466 | -0.000016 | 1.262821  |
| Mg9                                                     | -0.443563 | -1.853697 | 0.455881  |
| Mg10                                                    | -3.326730 | -2.785751 | -0.239513 |
| Mg11                                                    | 2.691224  | -2.693888 | -0.048927 |
| @mg11-isomer44 bp86/6-31G(d) Etot=-2200.939320 Eb=-9.84 |           |           |           |
| Mg1                                                     | 0.917871  | -1.669928 | 0.551936  |
| Mg2                                                     | 0.671683  | 1.001727  | -1.064429 |
| Mg3                                                     | 1.313766  | 1.167468  | 1.951577  |
| Mg4                                                     | 3.543151  | 0.108135  | 0.204842  |
| Mg5                                                     | -0.969748 | 3.156288  | 0.640156  |
| Mg6                                                     | 6.422807  | -0.722093 | -0.974584 |
| Mg7                                                     | -1.467928 | -1.450859 | -1.541025 |
| Mg8                                                     | -1.672063 | 0.284845  | 1.136732  |
| Mg9                                                     | -2.379176 | 1.553263  | -1.691285 |
| Mg10                                                    | -2.034403 | -2.689933 | 1.224280  |
| Mg11                                                    | -4.345960 | -0.738912 | -0.438199 |
| @mg11-isomer45 bp86/6-31G(d) Etot=-2200.938732 Eb=-9.81 |           |           |           |
| Mg1                                                     | 4.114646  | -1.175732 | -0.367579 |
| Mg2                                                     | 1.348401  | -0.897651 | -2.259602 |
| Mg3                                                     | 2.840664  | 1.599045  | -0.551833 |
| Mg4                                                     | 1.243435  | -0.687391 | 0.865703  |
| Mg5                                                     | 3.856837  | 0.517763  | 2.175561  |
| Mg6                                                     | -1.182049 | -1.868648 | -0.840563 |
| Mg7                                                     | -0.533426 | 1.284209  | -1.296025 |
| Mg8                                                     | -1.882401 | 0.304216  | 1.583177  |
| Mg9                                                     | -3.455508 | -2.383644 | 1.187512  |
| Mg10                                                    | -2.582975 | 3.071276  | 0.158955  |
| Mg11                                                    | -3.767626 | 0.236557  | -0.655304 |
| @mg11-isomer46 bp86/6-31G(d) Etot=-2200.938458 Eb=-9.79 |           |           |           |
| Mg1                                                     | -6.104709 | 0.228475  | 0.466693  |
| Mg2                                                     | -2.934977 | 0.105397  | 0.288621  |
| Mg3                                                     | -1.009472 | 0.137868  | -2.104068 |
| Mg4                                                     | 1.519098  | 2.097546  | -1.676310 |
| Mg5                                                     | 1.982577  | -1.035125 | -1.107081 |
| Mg6                                                     | 1.507115  | -4.060357 | -0.284418 |
| Mg7                                                     | -0.786016 | -2.104842 | 0.125641  |
| Mg8                                                     | -0.106182 | 1.024812  | 0.828132  |
| Mg9                                                     | 1.193839  | 4.094257  | 0.674979  |
| Mg10                                                    | 1.832711  | -1.689425 | 1.843304  |
| Mg11                                                    | 2.906016  | 1.201395  | 0.944509  |
| @mg11-isomer47 bp86/6-31G(d) Etot=-2200.938107 Eb=-9.77 |           |           |           |
| Mg1                                                     | 5.957117  | -1.513828 | 0.636831  |
| Mg2                                                     | 3.003993  | -0.416666 | 0.121739  |
| Mg3                                                     | 0.497159  | -2.005843 | -1.316938 |
| Mg4                                                     | 2.014153  | 2.568398  | 0.709835  |
| Mg5                                                     | 0.125907  | 0.153500  | 1.063144  |
| Mg6                                                     | 1.108841  | 1.026589  | -1.799417 |
| Mg7                                                     | -1.925253 | -2.193775 | 0.839905  |
| Mg8                                                     | -1.070482 | 2.816145  | -0.368638 |
| Mg9                                                     | -1.952272 | -0.021287 | -1.391298 |
| Mg10                                                    | -2.905825 | 0.862684  | 1.405250  |
| Mg11                                                    | -4.853340 | -1.275915 | 0.099587  |
| @mg11-isomer48 bp86/6-31G(d) Etot=-2200.937683 Eb=-9.75 |           |           |           |
| Mg1                                                     | 1.858237  | 0.550741  | -1.207038 |
| Mg2                                                     | -0.129792 | 1.896986  | 1.056362  |
| Mg3                                                     | 0.404481  | -1.266975 | 1.065223  |
| Mg4                                                     | -1.348453 | 0.060493  | -1.209718 |
| Mg5                                                     | 3.579784  | -1.854750 | -0.048270 |

|      |           |           |           |
|------|-----------|-----------|-----------|
| Mg6  | 3.106549  | 0.781530  | 1.492675  |
| Mg7  | -3.134575 | 2.488065  | -0.313601 |
| Mg8  | -4.412663 | -0.438460 | -1.085466 |
| Mg9  | -2.290083 | -2.783581 | -0.020859 |
| Mg10 | -2.639183 | -0.089631 | 1.480974  |
| Mg11 | 5.005698  | 0.655584  | -1.210285 |

@mg11-isomer49 bp86/6-31G(d) Etot=-2200.937580 Eb=-9.74

|      |           |           |           |
|------|-----------|-----------|-----------|
| Mg1  | 2.593043  | 2.031446  | -1.464839 |
| Mg2  | -1.289486 | -1.324875 | -1.789263 |
| Mg3  | 1.903155  | -1.014345 | -1.087441 |
| Mg4  | -0.274103 | 1.497052  | -0.643174 |
| Mg5  | 1.457545  | 4.139622  | 0.532883  |
| Mg6  | 0.522618  | -3.792137 | -0.489013 |
| Mg7  | -2.901332 | 0.315699  | 0.329831  |
| Mg8  | 2.109364  | 0.924143  | 1.375972  |
| Mg9  | -0.447333 | -1.267773 | 1.201735  |
| Mg10 | -6.045007 | 0.797162  | 0.400006  |
| Mg11 | 2.371535  | -2.305995 | 1.633303  |

@mg11-isomer50 bp86/6-31G(d) Etot=-2200.937102 Eb=-9.72

|      |           |           |           |
|------|-----------|-----------|-----------|
| Mg1  | 1.224942  | 2.343583  | 0.508206  |
| Mg2  | -0.000032 | 0.000002  | 2.294988  |
| Mg3  | 3.382462  | 1.220260  | -1.632528 |
| Mg4  | 3.610128  | 0.421731  | 1.294400  |
| Mg5  | -1.366416 | 0.970011  | -0.352674 |
| Mg6  | 1.366439  | -0.970050 | -0.352629 |
| Mg7  | 4.344805  | -1.656053 | -0.964903 |
| Mg8  | -1.224954 | -2.343594 | 0.508183  |
| Mg9  | -3.610136 | -0.421732 | 1.294376  |
| Mg10 | -3.382471 | -1.220239 | -1.632530 |
| Mg11 | -4.344766 | 1.656082  | -0.964889 |

@mg11-isomer51 bp86/6-31G(d) Etot=-2200.936849 Eb=-9.70

|      |           |           |           |
|------|-----------|-----------|-----------|
| Mg1  | -4.057344 | 0.767244  | 1.101304  |
| Mg2  | -4.098312 | 0.623861  | -1.993703 |
| Mg3  | -1.266954 | -0.645931 | 2.305643  |
| Mg4  | -2.943768 | -1.698515 | -0.284201 |
| Mg5  | -1.341549 | 1.033089  | -0.441377 |
| Mg6  | 1.263959  | 1.008154  | 1.445187  |
| Mg7  | 0.482913  | -1.639325 | -0.074752 |
| Mg8  | 1.584139  | 1.487375  | -1.577987 |
| Mg9  | 3.725414  | -0.323004 | -0.317005 |
| Mg10 | 3.054256  | -3.327339 | -0.491460 |
| Mg11 | 3.597247  | 2.714392  | 0.328350  |

@mg11-isomer52 bp86/6-31G(d) Etot=-2200.936791 Eb=-9.70

|      |           |           |           |
|------|-----------|-----------|-----------|
| Mg1  | -0.000009 | 0.667491  | 0.000080  |
| Mg2  | 2.439336  | -1.073153 | 0.973413  |
| Mg3  | -2.841112 | 2.031658  | -0.909714 |
| Mg4  | -5.392615 | 0.408803  | -0.117941 |
| Mg5  | -2.439311 | -1.073138 | -0.973467 |
| Mg6  | -0.593570 | -2.101352 | 1.416621  |
| Mg7  | -2.808875 | 0.400213  | 1.692576  |
| Mg8  | 0.593610  | -2.101261 | -1.416667 |
| Mg9  | 2.808804  | 0.400344  | -1.692580 |
| Mg10 | 2.841152  | 2.031640  | 0.909820  |
| Mg11 | 5.392590  | 0.408754  | 0.117857  |

@mg11-isomer53 bp86/6-31G(d) Etot=-2200.936572 Eb=-9.69

|     |          |           |           |
|-----|----------|-----------|-----------|
| Mg1 | 4.570964 | 0.000029  | 0.000049  |
| Mg2 | 2.574960 | 2.604145  | 0.030758  |
| Mg3 | 1.768175 | 0.018462  | -1.564573 |
| Mg4 | 2.574923 | -2.604180 | -0.030750 |

|      |           |           |           |
|------|-----------|-----------|-----------|
| Mg5  | 1.768163  | -0.018484 | 1.564584  |
| Mg6  | -0.487681 | -1.577304 | -0.018668 |
| Mg7  | -1.280038 | 0.030900  | -2.607806 |
| Mg8  | -1.280051 | -0.030911 | 2.607766  |
| Mg9  | -0.487644 | 1.577319  | 0.018622  |
| Mg10 | -3.224239 | -0.000001 | -0.000053 |
| Mg11 | -6.497532 | 0.000026  | 0.000071  |

@mg11-isomer54 bp86/6-31G(d) Etot=-2200.936305 Eb=-9.67

|      |           |           |           |
|------|-----------|-----------|-----------|
| Mg1  | -0.463939 | -0.943776 | -0.764717 |
| Mg2  | 2.396171  | 0.766373  | -1.167025 |
| Mg3  | -3.685690 | -2.096187 | -0.043605 |
| Mg4  | -3.422140 | 0.507990  | -1.588937 |
| Mg5  | -0.521257 | 2.108100  | -0.763742 |
| Mg6  | -2.332769 | 0.421216  | 1.320850  |
| Mg7  | 5.330326  | -0.484267 | -1.074890 |
| Mg8  | 0.949010  | 0.590832  | 1.520043  |
| Mg9  | 2.922763  | -1.834954 | 0.371525  |
| Mg10 | 4.299600  | 0.663372  | 1.505794  |
| Mg11 | -5.472077 | 0.301301  | 0.684703  |

@mg11-isomer55 bp86/6-31G(d) Etot=-2200.936014 Eb=-9.65

|      |           |           |           |
|------|-----------|-----------|-----------|
| Mg1  | -4.046294 | -2.367869 | 0.417802  |
| Mg2  | -1.019386 | -1.962452 | 0.212331  |
| Mg3  | 4.196012  | -0.914748 | -1.158688 |
| Mg4  | 1.890748  | -1.077299 | 0.889527  |
| Mg5  | 4.651222  | 0.203216  | 1.771749  |
| Mg6  | 0.716424  | -0.550894 | -2.003304 |
| Mg7  | -2.713532 | 0.147229  | -1.413254 |
| Mg8  | -2.833581 | 3.041188  | -0.173893 |
| Mg9  | 2.893962  | 1.693252  | -0.309764 |
| Mg10 | -3.390582 | 0.500131  | 1.490688  |
| Mg11 | -0.344994 | 1.288247  | 0.276807  |

@mg11-isomer56 bp86/6-31G(d) Etot=-2200.934422 Eb=-9.56

|      |           |           |           |
|------|-----------|-----------|-----------|
| Mg1  | -1.373157 | 0.399440  | 1.050915  |
| Mg2  | -3.976050 | 2.040736  | 0.727041  |
| Mg3  | 1.076152  | -1.533309 | 0.688535  |
| Mg4  | -2.143709 | 1.615058  | -1.744944 |
| Mg5  | -1.782727 | -2.866170 | 0.887856  |
| Mg6  | 6.694344  | 0.141737  | -0.957122 |
| Mg7  | 3.781439  | 0.112899  | 0.437637  |
| Mg8  | 1.503164  | 1.216420  | 2.130510  |
| Mg9  | 1.003961  | 1.144717  | -0.913523 |
| Mg10 | -3.833682 | -0.747038 | -0.593318 |
| Mg11 | -0.949736 | -1.524489 | -1.713586 |

@mg11-isomer57 bp86/6-31G(d) Etot=-2200.931479 Eb=-9.40

|      |           |           |           |
|------|-----------|-----------|-----------|
| Mg1  | -1.762978 | -2.010530 | 1.464892  |
| Mg2  | 1.127549  | -0.987274 | 0.933585  |
| Mg3  | 3.921403  | 0.315002  | -0.018137 |
| Mg4  | -3.817779 | 0.591903  | 1.753335  |
| Mg5  | -1.258301 | 0.905679  | -0.047810 |
| Mg6  | 1.584528  | 2.133310  | 0.712194  |
| Mg7  | 7.094139  | -0.157759 | 0.248834  |
| Mg8  | -3.648517 | -0.996871 | -0.861856 |
| Mg9  | 1.428727  | 0.397377  | -1.795909 |
| Mg10 | -4.023907 | 2.029046  | -0.953426 |
| Mg11 | -0.644864 | -2.219883 | -1.435701 |

@mg11-isomer58 bp86/6-31G(d) Etot=-2200.930545 Eb=-9.34

|     |           |           |           |
|-----|-----------|-----------|-----------|
| Mg1 | -0.024964 | -2.227929 | 1.626456  |
| Mg2 | 0.632695  | 0.729104  | 1.527514  |
| Mg3 | -1.674415 | -0.305781 | -0.291772 |

|      |           |           |           |
|------|-----------|-----------|-----------|
| Mg4  | 3.109374  | -1.604673 | 1.246936  |
| Mg5  | 1.062222  | -1.283489 | -1.151382 |
| Mg6  | -4.775042 | -0.137816 | -0.220080 |
| Mg7  | 1.999366  | 3.379482  | 0.981330  |
| Mg8  | 3.342403  | 1.065836  | -0.467590 |
| Mg9  | -8.103753 | -0.002336 | -0.230155 |
| Mg10 | 0.398380  | 1.990402  | -1.321251 |
| Mg11 | 4.033734  | -1.602800 | -1.700007 |

@mg11-isomer59 bp86/6-31G(d) Etot=-2200.930488 Eb=-9.34

|      |           |           |           |
|------|-----------|-----------|-----------|
| Mg1  | 6.228857  | -0.090449 | 0.000792  |
| Mg2  | 1.542075  | 1.837650  | -0.000872 |
| Mg3  | -1.376784 | 3.160582  | -0.000082 |
| Mg4  | 3.420178  | -0.063619 | -1.470542 |
| Mg5  | -3.831824 | -1.011042 | 1.464484  |
| Mg6  | -4.145840 | 1.676293  | 0.000099  |
| Mg7  | -1.597102 | -2.766864 | -0.000270 |
| Mg8  | -1.208893 | 0.154347  | -0.000782 |
| Mg9  | 3.419191  | -0.063245 | 1.470735  |
| Mg10 | -3.833447 | -1.011804 | -1.463041 |
| Mg11 | 1.383589  | -1.821848 | -0.000520 |

@mg11-isomer60 bp86/6-31G(d) Etot=-2200.929657 Eb=-9.29

|      |           |           |           |
|------|-----------|-----------|-----------|
| Mg1  | 0.457435  | 0.636718  | -1.264104 |
| Mg2  | 3.074239  | -0.648744 | -0.059363 |
| Mg3  | 2.760058  | 2.646870  | -0.370337 |
| Mg4  | -2.346745 | -1.314140 | -1.635634 |
| Mg5  | -4.959889 | -0.076138 | -0.380928 |
| Mg6  | -0.042263 | -1.765227 | 0.613782  |
| Mg7  | 5.635630  | -2.629277 | -0.186527 |
| Mg8  | 1.056932  | 1.028454  | 1.599311  |
| Mg9  | -2.090349 | 0.933405  | 0.575346  |
| Mg10 | -3.270782 | -2.292347 | 1.018325  |
| Mg11 | -0.274267 | 3.480426  | 0.090129  |

@mg11-isomer61 bp86/6-31G(d) Etot=-2200.929601 Eb=-9.29

|      |           |           |           |
|------|-----------|-----------|-----------|
| Mg1  | 0.930942  | -1.023645 | 1.060705  |
| Mg2  | 1.103266  | 1.338038  | -1.056695 |
| Mg3  | -2.189497 | -1.699670 | 1.580038  |
| Mg4  | 2.349951  | 1.649531  | 1.790315  |
| Mg5  | -1.520363 | -0.551748 | -1.212742 |
| Mg6  | -4.068448 | 0.446720  | 0.177567  |
| Mg7  | -3.966111 | -2.509413 | -0.884311 |
| Mg8  | 3.679349  | -0.272415 | -0.231748 |
| Mg9  | -1.065887 | 1.520040  | 1.192344  |
| Mg10 | -1.840228 | 2.579146  | -1.523202 |
| Mg11 | 6.587026  | -1.476583 | -0.892272 |

@mg11-isomer62 bp86/6-31G(d) Etot=-2200.929151 Eb=-9.26

|      |           |           |           |
|------|-----------|-----------|-----------|
| Mg1  | -4.635464 | 0.858418  | 1.036753  |
| Mg2  | -1.594668 | 0.903815  | 0.252443  |
| Mg3  | 0.450001  | -1.577253 | 1.458407  |
| Mg4  | 2.789165  | -1.815316 | -0.743162 |
| Mg5  | 0.000022  | 3.633696  | 0.000013  |
| Mg6  | -2.789273 | -1.815244 | 0.743388  |
| Mg7  | 3.723183  | -0.186198 | 1.779716  |
| Mg8  | -3.722990 | -0.186501 | -1.779828 |
| Mg9  | 4.635348  | 0.858165  | -1.037173 |
| Mg10 | -0.449975 | -1.577444 | -1.458131 |
| Mg11 | 1.594652  | 0.903862  | -0.252426 |

@mg11-isomer63 bp86/6-31G(d) Etot=-2200.929096 Eb=-9.26

|     |           |           |          |
|-----|-----------|-----------|----------|
| Mg1 | 0.060556  | -1.369920 | 0.000400 |
| Mg2 | -1.508365 | 1.040403  | 1.524264 |

|      |           |           |           |
|------|-----------|-----------|-----------|
| Mg3  | -1.508347 | 1.039809  | -1.524523 |
| Mg4  | -2.968940 | -1.264127 | 0.000159  |
| Mg5  | 1.332101  | 1.784551  | -0.000299 |
| Mg6  | 1.340708  | -0.033080 | 2.630713  |
| Mg7  | -1.000390 | 3.758594  | -0.000622 |
| Mg8  | 2.981141  | -0.689743 | 0.000254  |
| Mg9  | 5.911983  | -1.876326 | -0.000042 |
| Mg10 | 1.340650  | -0.034419 | -2.630488 |
| Mg11 | -5.981097 | -2.355742 | 0.000184  |

@mg11-isomer64 bp86/6-31G(d) Etot=-2200.924178 Eb=-8.98

|      |           |           |           |
|------|-----------|-----------|-----------|
| Mg1  | -0.986077 | -1.218976 | -0.977344 |
| Mg2  | 0.812566  | 0.934372  | 0.729472  |
| Mg3  | -2.287916 | 0.323371  | 1.407086  |
| Mg4  | 2.210674  | -1.857125 | -0.319667 |
| Mg5  | 3.776911  | 0.786338  | -0.110498 |
| Mg6  | 0.149464  | -4.111393 | -0.560119 |
| Mg7  | 6.590065  | 2.407159  | -0.216219 |
| Mg8  | -0.100413 | -2.115463 | 1.747116  |
| Mg9  | -4.156162 | 0.073735  | -1.137504 |
| Mg10 | -4.309013 | 2.728178  | 0.464858  |
| Mg11 | -1.700098 | 2.049805  | -1.027180 |

@mg11-isomer65 bp86/6-31G(d) Etot=-2200.920944 Eb=-8.79

|      |           |           |           |
|------|-----------|-----------|-----------|
| Mg1  | -0.966071 | 0.000077  | 1.149094  |
| Mg2  | 1.406672  | 1.557115  | -0.115369 |
| Mg3  | 1.406756  | -1.557120 | -0.115047 |
| Mg4  | -1.060895 | -0.000197 | -1.873879 |
| Mg5  | -3.708982 | -0.000189 | -0.480222 |
| Mg6  | 4.195014  | 0.000198  | 0.488876  |
| Mg7  | -6.813311 | 0.000158  | 0.413361  |
| Mg8  | 6.959533  | -0.000145 | -1.147956 |
| Mg9  | 1.991329  | 0.000291  | 2.512276  |
| Mg10 | -1.704957 | -2.648724 | -0.415343 |
| Mg11 | -1.705088 | 2.648536  | -0.415791 |

@mg11-isomer66 bp86/6-31G(d) Etot=-2200.914179 Eb=-8.41

|      |           |           |           |
|------|-----------|-----------|-----------|
| Mg1  | 2.239216  | 0.365805  | 0.000568  |
| Mg2  | 5.328618  | 0.863759  | 0.000202  |
| Mg3  | -0.692816 | 1.157111  | 0.000282  |
| Mg4  | -2.676755 | -1.470795 | -0.000263 |
| Mg5  | -3.407258 | 1.116133  | 1.504472  |
| Mg6  | -3.406868 | 1.116474  | -1.504600 |
| Mg7  | 8.627169  | 1.368017  | -0.000405 |
| Mg8  | 0.329107  | -1.646183 | -1.450564 |
| Mg9  | 0.328725  | -1.646437 | 1.450796  |
| Mg10 | -1.068204 | -4.086814 | -0.000326 |
| Mg11 | -5.600934 | 2.862930  | -0.000163 |

@mg11-isomer67 bp86/6-31G(d) Etot=-2200.913080 Eb=-8.35

|      |           |           |           |
|------|-----------|-----------|-----------|
| Mg1  | 1.131380  | -0.145097 | -0.176536 |
| Mg2  | -1.536368 | -1.591281 | -0.544317 |
| Mg3  | -1.330623 | 0.927749  | 1.473795  |
| Mg4  | -4.151842 | 0.543780  | -0.166638 |
| Mg5  | 4.227526  | -0.135729 | -0.042163 |
| Mg6  | -1.086018 | 1.689419  | -1.379679 |
| Mg7  | -3.733445 | -1.939602 | 1.663427  |
| Mg8  | -3.075752 | 3.373784  | 0.385516  |
| Mg9  | 6.915196  | -0.521516 | 1.693368  |
| Mg10 | -4.424225 | -2.255652 | -1.352024 |
| Mg11 | 7.064170  | 0.054143  | -1.554749 |

@mg11-isomer68 bp86/6-31G(d) Etot=-2200.912731 Eb=-8.33

|     |          |          |           |
|-----|----------|----------|-----------|
| Mg1 | 0.136592 | 2.247274 | -0.062785 |
|-----|----------|----------|-----------|

|      |           |           |           |
|------|-----------|-----------|-----------|
| Mg2  | -0.220787 | -0.758684 | 0.866519  |
| Mg3  | 2.509932  | 0.384263  | -0.234672 |
| Mg4  | -2.453855 | -2.074170 | -1.052238 |
| Mg5  | 5.535349  | -0.297456 | 0.116225  |
| Mg6  | -2.647470 | 3.733854  | 0.459645  |
| Mg7  | 8.830657  | -0.736071 | 0.397734  |
| Mg8  | 0.063829  | -0.074142 | -2.041341 |
| Mg9  | -2.955647 | 0.712942  | -0.098571 |
| Mg10 | -5.526376 | -1.485011 | -0.223851 |
| Mg11 | -3.272225 | -1.652799 | 1.873333  |

@mg12-isomer01 bp86/6-31G(d) Etot=-2401.066331 Eb=-12.02

|      |           |           |           |
|------|-----------|-----------|-----------|
| Mg1  | -0.672502 | -2.280994 | 0.000198  |
| Mg2  | 0.614792  | 0.124786  | 1.540187  |
| Mg3  | 0.614649  | 0.124624  | -1.540175 |
| Mg4  | -2.132062 | 1.662410  | -1.560147 |
| Mg5  | -2.131966 | 1.662585  | 1.559882  |
| Mg6  | -1.885657 | -1.201621 | 2.636851  |
| Mg7  | 0.261287  | 2.718138  | -0.000189 |
| Mg8  | -1.885696 | -1.202053 | -2.636602 |
| Mg9  | 2.328892  | -2.055131 | -0.000070 |
| Mg10 | -3.337754 | -0.699793 | 0.000072  |
| Mg11 | 4.977826  | -0.645521 | 0.000018  |
| Mg12 | 3.248190  | 1.792570  | -0.000024 |

@mg12-isomer02 bp86/6-31G(d) Etot=-2401.063762 Eb=-11.88

|      |           |           |           |
|------|-----------|-----------|-----------|
| Mg1  | -0.901618 | -1.519350 | -2.586062 |
| Mg2  | 0.461526  | -2.324041 | 0.000327  |
| Mg3  | -4.219171 | 1.091550  | -0.000156 |
| Mg4  | -0.901746 | -1.518547 | 2.586391  |
| Mg5  | -2.589756 | -1.443762 | 0.000128  |
| Mg6  | 0.791966  | 2.731509  | -0.000393 |
| Mg7  | -1.486273 | 1.323055  | -1.507118 |
| Mg8  | 1.390516  | 0.172136  | 1.593344  |
| Mg9  | -1.486390 | 1.323710  | 1.506823  |
| Mg10 | 1.390703  | 0.171648  | -1.593492 |
| Mg11 | 3.940605  | 1.574242  | -0.000130 |
| Mg12 | 3.609638  | -1.582152 | 0.000337  |

@mg12-isomer03 bp86/6-31G(d) Etot=-2401.063484 Eb=-11.87

|      |           |           |           |
|------|-----------|-----------|-----------|
| Mg1  | -0.105445 | 1.577792  | 1.538028  |
| Mg2  | 2.649494  | -2.282832 | 0.297423  |
| Mg3  | -0.320845 | 2.606421  | -1.302484 |
| Mg4  | -2.877842 | 1.514376  | -0.082111 |
| Mg5  | -2.505378 | 0.000224  | 2.576841  |
| Mg6  | 2.649877  | 2.282682  | 0.297480  |
| Mg7  | -2.878181 | -1.514219 | -0.082079 |
| Mg8  | -1.781667 | -0.000017 | -2.560095 |
| Mg9  | 4.608109  | -0.000244 | 0.067142  |
| Mg10 | 0.988701  | -0.000060 | -0.986112 |
| Mg11 | -0.105651 | -1.577667 | 1.538198  |
| Mg12 | -0.321174 | -2.606454 | -1.302232 |

@mg12-isomer04 bp86/6-31G(d) Etot=-2401.061643 Eb=-11.77

|      |           |           |           |
|------|-----------|-----------|-----------|
| Mg1  | -1.669174 | 1.637854  | -1.901631 |
| Mg2  | 3.834458  | -1.524488 | -0.049492 |
| Mg3  | -1.669033 | -1.637160 | -1.902254 |
| Mg4  | -0.919019 | -0.000692 | 3.508689  |
| Mg5  | -3.817290 | 0.000012  | -0.500374 |
| Mg6  | 0.996387  | 0.000393  | -1.801677 |
| Mg7  | 1.082687  | -0.000186 | 1.259655  |
| Mg8  | 0.857011  | -2.624789 | -0.352051 |
| Mg9  | -1.693558 | -1.647239 | 1.069312  |
| Mg10 | 3.834327  | 1.524585  | -0.049016 |

|                                                          |           |           |           |
|----------------------------------------------------------|-----------|-----------|-----------|
| Mg11                                                     | 0.856853  | 2.624971  | -0.351072 |
| Mg12                                                     | -1.693649 | 1.646740  | 1.069910  |
| @mg12-isomer05 bp86/6-31G(d) Etot=-2401.061334 Eb=-11.76 |           |           |           |
| Mg1                                                      | 1.179528  | -0.359440 | -1.561683 |
| Mg2                                                      | -0.331357 | 2.205886  | 1.492975  |
| Mg3                                                      | -0.638518 | -2.289798 | 0.000002  |
| Mg4                                                      | 2.505872  | 2.255215  | 0.000037  |
| Mg5                                                      | 4.195160  | -0.202720 | -0.000018 |
| Mg6                                                      | 1.179525  | -0.359470 | 1.561743  |
| Mg7                                                      | 2.381188  | -2.651051 | -0.000040 |
| Mg8                                                      | -3.598428 | -1.472003 | -0.000048 |
| Mg9                                                      | -1.781975 | -0.397226 | -2.313101 |
| Mg10                                                     | -2.977652 | 1.461951  | 0.000016  |
| Mg11                                                     | -0.331328 | 2.205945  | -1.492969 |
| Mg12                                                     | -1.782015 | -0.397289 | 2.313085  |
| @mg12-isomer06 bp86/6-31G(d) Etot=-2401.061262 Eb=-11.75 |           |           |           |
| Mg1                                                      | 1.822087  | -1.592606 | -0.000538 |
| Mg2                                                      | 4.984166  | -1.450040 | 0.000091  |
| Mg3                                                      | -0.831172 | -1.521362 | 1.542807  |
| Mg4                                                      | -1.155591 | 2.655239  | 0.000551  |
| Mg5                                                      | -3.004821 | 0.271055  | 0.000294  |
| Mg6                                                      | -1.789029 | 1.255091  | 2.637933  |
| Mg7                                                      | -3.182398 | -2.727260 | -0.000352 |
| Mg8                                                      | 3.790997  | 1.410152  | -0.000238 |
| Mg9                                                      | -1.789632 | 1.256145  | -2.637215 |
| Mg10                                                     | -0.831441 | -1.520717 | -1.543380 |
| Mg11                                                     | 0.993227  | 0.982453  | -1.547069 |
| Mg12                                                     | 0.993606  | 0.981849  | 1.547117  |
| @mg12-isomer07 bp86/6-31G(d) Etot=-2401.061060 Eb=-11.74 |           |           |           |
| Mg1                                                      | -2.922355 | 1.437370  | 0.195346  |
| Mg2                                                      | -0.869575 | 2.353040  | -1.931305 |
| Mg3                                                      | 1.317805  | -0.526427 | 1.649999  |
| Mg4                                                      | -3.614275 | -1.476760 | 0.369175  |
| Mg5                                                      | 4.289610  | -0.513586 | -0.266973 |
| Mg6                                                      | 3.043078  | 2.096841  | 0.553983  |
| Mg7                                                      | 0.937302  | 0.091260  | -1.321820 |
| Mg8                                                      | -0.019009 | 2.108557  | 1.042536  |
| Mg9                                                      | -1.964596 | -0.558193 | -2.179348 |
| Mg10                                                     | -1.634807 | -0.174570 | 2.456107  |
| Mg11                                                     | 2.148749  | -2.602967 | -0.664494 |
| Mg12                                                     | -0.711928 | -2.234564 | 0.096795  |
| @mg12-isomer08 bp86/6-31G(d) Etot=-2401.060746 Eb=-11.73 |           |           |           |
| Mg1                                                      | 2.218607  | 0.525003  | 1.548751  |
| Mg2                                                      | -0.025213 | -1.292084 | -2.623444 |
| Mg3                                                      | -1.636840 | -1.136586 | -0.000844 |
| Mg4                                                      | 1.280178  | -2.094495 | -0.000876 |
| Mg5                                                      | -0.026001 | -1.294482 | 2.621957  |
| Mg6                                                      | 2.219102  | 0.526369  | -1.547821 |
| Mg7                                                      | -0.700398 | 1.477304  | -1.547532 |
| Mg8                                                      | -4.866764 | -1.430654 | 0.000079  |
| Mg9                                                      | -3.497844 | 1.532229  | -0.000039 |
| Mg10                                                     | -0.700863 | 1.475937  | 1.548367  |
| Mg11                                                     | 4.271852  | -1.288641 | -0.000011 |
| Mg12                                                     | 1.464184  | 3.000100  | 0.001414  |
| @mg12-isomer09 bp86/6-31G(d) Etot=-2401.059249 Eb=-11.65 |           |           |           |
| Mg1                                                      | -3.471388 | -1.674324 | -0.281634 |
| Mg2                                                      | -0.699778 | -2.192838 | -1.506968 |
| Mg3                                                      | -0.880920 | -1.637971 | 1.438769  |
| Mg4                                                      | -2.313392 | 0.486495  | -2.142547 |

|      |           |           |           |
|------|-----------|-----------|-----------|
| Mg5  | -2.533045 | 1.106080  | 0.798932  |
| Mg6  | 1.878496  | -1.658093 | 0.086097  |
| Mg7  | -1.133283 | 0.607617  | 3.442475  |
| Mg8  | 0.823079  | 0.504091  | -1.878185 |
| Mg9  | 4.927146  | -1.141604 | 0.213699  |
| Mg10 | 0.662283  | 1.125193  | 1.080058  |
| Mg11 | -0.820741 | 2.860046  | -0.975302 |
| Mg12 | 3.561542  | 1.615307  | -0.275394 |

@mg12-isomer10 bp86/6-31G(d) Etot=-2401.058340 Eb=-11.60

|      |           |           |           |
|------|-----------|-----------|-----------|
| Mg1  | 0.381418  | 1.535325  | 1.556773  |
| Mg2  | 5.729103  | -0.000231 | 0.000001  |
| Mg3  | 2.531029  | -0.000046 | 0.000054  |
| Mg4  | -2.340390 | -1.541319 | -0.000050 |
| Mg5  | -0.514463 | 4.178844  | -0.000038 |
| Mg6  | -2.037932 | 0.000022  | 2.616858  |
| Mg7  | -2.340244 | 1.541471  | 0.000020  |
| Mg8  | 0.381441  | 1.535296  | -1.556691 |
| Mg9  | -2.037843 | 0.000090  | -2.616895 |
| Mg10 | 0.381385  | -1.535321 | -1.556730 |
| Mg11 | 0.381348  | -1.535314 | 1.556700  |
| Mg12 | -0.514852 | -4.178816 | 0.000000  |

@mg12-isomer11 bp86/6-31G(d) Etot=-2401.057710 Eb=-11.57

|      |           |           |           |
|------|-----------|-----------|-----------|
| Mg1  | -1.541090 | -1.607489 | -1.306286 |
| Mg2  | 1.556038  | 1.397009  | -0.403142 |
| Mg3  | -4.183485 | -0.299383 | 0.025915  |
| Mg4  | -1.556199 | 1.396904  | -0.403259 |
| Mg5  | -0.000172 | 1.651017  | 2.199966  |
| Mg6  | 0.000070  | 0.506357  | -2.897336 |
| Mg7  | 1.541391  | -1.607393 | -1.306247 |
| Mg8  | -1.523647 | -0.980569 | 1.703817  |
| Mg9  | 0.000155  | -3.550334 | 0.599849  |
| Mg10 | 1.523649  | -0.980428 | 1.703902  |
| Mg11 | -0.000228 | 4.373216  | 0.056797  |
| Mg12 | 4.183515  | -0.298907 | 0.026024  |

@mg12-isomer12 bp86/6-31G(d) Etot=-2401.057585 Eb=-11.56

|      |           |           |           |
|------|-----------|-----------|-----------|
| Mg1  | -2.147998 | -1.452830 | 1.066802  |
| Mg2  | -0.612205 | 0.331285  | 3.006055  |
| Mg3  | 0.938895  | -0.197722 | -1.793668 |
| Mg4  | 0.938867  | 1.652180  | 0.725574  |
| Mg5  | 0.938947  | -1.454543 | 1.068045  |
| Mg6  | -2.147962 | 1.650324  | 0.724785  |
| Mg7  | -4.843168 | 0.000090  | 0.000019  |
| Mg8  | -2.147946 | -0.197473 | -1.791554 |
| Mg9  | -0.612246 | 2.437642  | -1.789958 |
| Mg10 | 3.526949  | -0.000025 | 0.000037  |
| Mg11 | -0.612267 | -2.769015 | -1.216128 |
| Mg12 | 6.780136  | 0.000088  | -0.000009 |

@mg12-isomer13 bp86/6-31G(d) Etot=-2401.056938 Eb=-11.53

|      |           |           |           |
|------|-----------|-----------|-----------|
| Mg1  | 4.816210  | 1.111537  | -0.184726 |
| Mg2  | 1.008949  | -0.960524 | 2.178879  |
| Mg3  | 1.658367  | 1.144869  | -0.021972 |
| Mg4  | 3.571822  | -1.741335 | 0.235857  |
| Mg5  | -2.329455 | -0.167350 | -1.500644 |
| Mg6  | -2.324524 | -3.057298 | -0.706056 |
| Mg7  | -0.646222 | 1.613251  | 2.067117  |
| Mg8  | 0.344032  | -1.657570 | -0.687774 |
| Mg9  | -3.465749 | 1.634040  | 0.757912  |
| Mg10 | 0.364472  | 0.609668  | -2.765281 |
| Mg11 | -1.024169 | 2.524089  | -0.850582 |
| Mg12 | -1.973732 | -1.053378 | 1.477270  |



@mg12-isomer14 bp86/6-31G(d) Etot=-2401.056853 Eb=-11.52

|      |           |           |           |
|------|-----------|-----------|-----------|
| Mg1  | -0.066113 | 0.302206  | -2.532931 |
| Mg2  | -3.922380 | 0.616910  | 1.743246  |
| Mg3  | -0.948057 | 1.341895  | 1.637727  |
| Mg4  | 0.910075  | -1.046398 | 2.205974  |
| Mg5  | 0.715997  | -2.029100 | -0.610193 |
| Mg6  | -0.460019 | 2.886014  | -0.969746 |
| Mg7  | 1.685432  | 1.009196  | 0.030883  |
| Mg8  | -1.962140 | -2.056895 | -1.992239 |
| Mg9  | 3.767620  | -1.620719 | 0.315329  |
| Mg10 | 4.852197  | 1.419052  | 0.090682  |
| Mg11 | -2.689188 | 0.769347  | -0.955591 |
| Mg12 | -1.883425 | -1.591508 | 1.036859  |

@mg12-isomer15 bp86/6-31G(d) Etot=-2401.056377 Eb=-11.50

|      |           |           |           |
|------|-----------|-----------|-----------|
| Mg1  | 0.084783  | 1.497994  | 1.776559  |
| Mg2  | -2.901254 | 1.550093  | 0.528127  |
| Mg3  | 1.377362  | -1.310464 | 2.123184  |
| Mg4  | 0.562520  | -2.186435 | -0.630334 |
| Mg5  | 2.295083  | 0.408977  | -0.319453 |
| Mg6  | -0.203059 | 2.101313  | -1.154093 |
| Mg7  | 2.329116  | 3.280618  | 0.396941  |
| Mg8  | -1.590402 | -1.145268 | 1.461251  |
| Mg9  | -4.554024 | -1.187588 | 0.190981  |
| Mg10 | -1.963191 | -0.506642 | -1.562310 |
| Mg11 | 0.704482  | -0.216967 | -2.967120 |
| Mg12 | 3.858586  | -2.285632 | 0.156267  |

@mg12-isomer16 bp86/6-31G(d) Etot=-2401.055959 Eb=-11.48

|      |           |           |           |
|------|-----------|-----------|-----------|
| Mg1  | -4.295589 | 0.709424  | 0.705397  |
| Mg2  | -2.898655 | -1.632788 | -0.893819 |
| Mg3  | -0.000251 | -2.948729 | 0.071966  |
| Mg4  | 1.563622  | -0.760829 | 1.676367  |
| Mg5  | 4.295844  | 0.707744  | 0.704948  |
| Mg6  | -1.557105 | 1.660865  | -0.307275 |
| Mg7  | 0.000239  | 1.988366  | -2.918675 |
| Mg8  | -0.001546 | -0.772655 | -1.877742 |
| Mg9  | 2.896505  | -1.632057 | -0.895777 |
| Mg10 | 0.001347  | 1.780961  | 2.366499  |
| Mg11 | -1.562522 | -0.759639 | 1.676327  |
| Mg12 | 1.558112  | 1.659337  | -0.308218 |

@mg12-isomer17 bp86/6-31G(d) Etot=-2401.055867 Eb=-11.47

|      |           |           |           |
|------|-----------|-----------|-----------|
| Mg1  | -1.398996 | 0.810123  | 1.288712  |
| Mg2  | 0.793718  | -1.245687 | 2.395900  |
| Mg3  | 1.421589  | 1.750597  | 1.842280  |
| Mg4  | -1.867235 | 0.352230  | -1.790780 |
| Mg5  | 1.931745  | -3.177638 | -0.083370 |
| Mg6  | -3.801564 | -1.224009 | 0.385425  |
| Mg7  | 2.733631  | -0.383662 | 0.029755  |
| Mg8  | -0.778437 | -1.899472 | -0.078564 |
| Mg9  | 3.640338  | 2.440054  | -0.439145 |
| Mg10 | 0.680111  | 1.788090  | -1.111677 |
| Mg11 | -4.289429 | 1.816603  | -0.010684 |
| Mg12 | 0.934529  | -1.027228 | -2.427851 |

@mg12-isomer18 bp86/6-31G(d) Etot=-2401.055562 Eb=-11.46

|     |           |           |           |
|-----|-----------|-----------|-----------|
| Mg1 | -0.777534 | 1.370853  | 2.228128  |
| Mg2 | 0.288553  | -2.453746 | -0.720759 |
| Mg3 | -4.359014 | -1.004634 | -0.735760 |
| Mg4 | -3.219150 | 1.677717  | 0.102061  |
| Mg5 | 4.358907  | 1.004711  | -0.735816 |
| Mg6 | 3.219252  | -1.677708 | 0.102131  |

|      |           |           |           |
|------|-----------|-----------|-----------|
| Mg7  | -0.288534 | 2.453684  | -0.720936 |
| Mg8  | 0.777550  | -1.370749 | 2.228134  |
| Mg9  | 1.501978  | 0.201559  | -1.865870 |
| Mg10 | -1.924896 | -1.294867 | 0.992304  |
| Mg11 | -1.501971 | -0.201765 | -1.865871 |
| Mg12 | 1.924860  | 1.294944  | 0.992253  |

@mg12-isomer19 bp86/6-31G(d) Etot=-2401.054945 Eb=-11.42

|      |           |           |           |
|------|-----------|-----------|-----------|
| Mg1  | 0.338043  | 1.760666  | -1.150001 |
| Mg2  | -1.867549 | 1.287060  | 1.181697  |
| Mg3  | -3.461850 | -1.615321 | 0.836713  |
| Mg4  | -2.162475 | -0.138938 | -1.617384 |
| Mg5  | 2.895643  | -0.056498 | -0.439593 |
| Mg6  | -4.712458 | 1.039694  | -0.000883 |
| Mg7  | 0.711543  | -0.946914 | -2.578407 |
| Mg8  | 3.053039  | 2.963656  | -0.254056 |
| Mg9  | 1.193240  | 1.439938  | 1.776544  |
| Mg10 | -0.253725 | -1.262178 | 0.522642  |
| Mg11 | 2.210118  | -1.555450 | 2.236859  |
| Mg12 | 2.056432  | -2.915715 | -0.514131 |

@mg12-isomer20 bp86/6-31G(d) Etot=-2401.054857 Eb=-11.42

|      |           |           |           |
|------|-----------|-----------|-----------|
| Mg1  | 2.335146  | -2.056776 | 0.411241  |
| Mg2  | 2.335221  | 2.056759  | 0.411136  |
| Mg3  | -0.599394 | -2.616567 | 2.027787  |
| Mg4  | -0.439872 | -2.364299 | -1.028515 |
| Mg5  | -0.439855 | 2.364319  | -1.028475 |
| Mg6  | -1.966696 | 0.000029  | -2.231217 |
| Mg7  | -0.065726 | -0.000013 | 0.899725  |
| Mg8  | 1.263170  | 0.000000  | -2.074960 |
| Mg9  | -3.131237 | 1.510165  | 0.310570  |
| Mg10 | -3.131270 | -1.510127 | 0.310474  |
| Mg11 | 4.439777  | -0.000078 | -0.035561 |
| Mg12 | -0.599264 | 2.616588  | 2.027795  |

@mg12-isomer21 bp86/6-31G(d) Etot=-2401.054615 Eb=-11.41

|      |           |           |           |
|------|-----------|-----------|-----------|
| Mg1  | -0.403470 | 1.289981  | -0.856425 |
| Mg2  | 0.331979  | -1.895925 | -0.817664 |
| Mg3  | 0.580072  | 1.557803  | 2.100006  |
| Mg4  | -1.537080 | -0.577041 | 1.373543  |
| Mg5  | -4.752090 | -1.064713 | 0.266567  |
| Mg6  | 1.988168  | 2.934246  | -0.500160 |
| Mg7  | 3.217599  | -2.302155 | -0.398136 |
| Mg8  | 1.238597  | -1.542283 | 2.124076  |
| Mg9  | -3.548843 | 1.775190  | -0.097814 |
| Mg10 | 3.099450  | 0.492232  | 0.699623  |
| Mg11 | -2.403936 | -0.874926 | -1.684999 |
| Mg12 | 2.189556  | 0.207589  | -2.208616 |

@mg12-isomer22 bp86/6-31G(d) Etot=-2401.054506 Eb=-11.40

|      |           |           |           |
|------|-----------|-----------|-----------|
| Mg1  | 1.121967  | -0.140845 | -1.611560 |
| Mg2  | 0.794674  | 2.847688  | -1.479150 |
| Mg3  | -1.750135 | 0.958122  | -1.812736 |
| Mg4  | 1.445262  | -0.875376 | 1.581335  |
| Mg5  | -0.200116 | 1.695289  | 1.038833  |
| Mg6  | 3.964706  | -1.080798 | -0.376374 |
| Mg7  | -3.364880 | 0.828791  | 0.914303  |
| Mg8  | 2.970308  | 1.755201  | 0.679523  |
| Mg9  | -4.036647 | -1.264591 | -1.231416 |
| Mg10 | -1.197084 | -1.546264 | 0.037893  |
| Mg11 | 1.432373  | -2.935381 | -0.755748 |
| Mg12 | -1.180429 | -0.241837 | 3.015097  |

@mg12-isomer23 bp86/6-31G(d) Etot=-2401.054459 Eb=-11.40

|      |           |           |           |
|------|-----------|-----------|-----------|
| Mg1  | -1.215716 | -1.569046 | -2.140989 |
| Mg2  | 1.000188  | 0.493310  | -1.751254 |
| Mg3  | 1.206161  | -2.296867 | -0.394009 |
| Mg4  | 3.051478  | 2.287674  | -0.179339 |
| Mg5  | 3.832953  | -0.602275 | -0.978551 |
| Mg6  | 1.980081  | 0.172034  | 1.626288  |
| Mg7  | 0.491446  | -2.307955 | 2.680151  |
| Mg8  | -3.980297 | -0.958043 | -0.569293 |
| Mg9  | -1.939344 | 1.368712  | -1.357698 |
| Mg10 | -0.035595 | 2.412019  | 0.832435  |
| Mg11 | -1.033066 | -0.525758 | 0.865226  |
| Mg12 | -3.358289 | 1.526196  | 1.367033  |

@mg12-isomer24 bp86/6-31G(d) Etot=-2401.054390 Eb=-11.39

|      |           |           |           |
|------|-----------|-----------|-----------|
| Mg1  | -0.049826 | 2.539782  | -1.917920 |
| Mg2  | 2.182485  | 1.431020  | -0.297035 |
| Mg3  | -0.448063 | 2.046422  | 1.258859  |
| Mg4  | 4.398995  | 0.194020  | 1.278423  |
| Mg5  | 0.835042  | -0.540652 | -2.619114 |
| Mg6  | -3.878051 | 1.363174  | 0.837436  |
| Mg7  | -1.651761 | 0.166507  | -1.102028 |
| Mg8  | 2.850361  | -1.717325 | -0.571785 |
| Mg9  | 1.322183  | -0.488385 | 1.911326  |
| Mg10 | -3.719479 | -1.890318 | -0.332681 |
| Mg11 | -1.664195 | -0.698205 | 1.850732  |
| Mg12 | -0.177693 | -2.406040 | -0.296213 |

@mg12-isomer25 bp86/6-31G(d) Etot=-2401.054240 Eb=-11.39

|      |           |           |           |
|------|-----------|-----------|-----------|
| Mg1  | 2.778241  | -3.004114 | 0.539608  |
| Mg2  | 1.553823  | 0.192122  | -2.313893 |
| Mg3  | 0.114886  | -2.093879 | -0.719522 |
| Mg4  | 0.192303  | -1.553764 | 2.314175  |
| Mg5  | 2.093857  | 0.114972  | 0.719770  |
| Mg6  | 3.004206  | 2.777864  | -0.540054 |
| Mg7  | -3.004376 | -2.777927 | -0.540013 |
| Mg8  | -0.114939 | 2.093968  | -0.719772 |
| Mg9  | -2.093831 | -0.115075 | 0.719864  |
| Mg10 | -0.192180 | 1.554063  | 2.313902  |
| Mg11 | -1.553918 | -0.192199 | -2.313808 |
| Mg12 | -2.778071 | 3.003968  | 0.539743  |

@mg12-isomer26 bp86/6-31G(d) Etot=-2401.053700 Eb=-11.36

|      |           |           |           |
|------|-----------|-----------|-----------|
| Mg1  | 3.147368  | -3.017908 | 0.204689  |
| Mg2  | 2.940516  | -0.000101 | 0.288053  |
| Mg3  | 0.537088  | 1.624957  | 1.554140  |
| Mg4  | 0.855707  | 1.642314  | -1.481665 |
| Mg5  | -2.063717 | -1.646547 | -0.294091 |
| Mg6  | -1.284819 | 0.000075  | -2.873922 |
| Mg7  | -4.592116 | 0.000301  | 0.346500  |
| Mg8  | -2.016642 | 0.000061  | 2.273289  |
| Mg9  | -2.063301 | 1.646461  | -0.294105 |
| Mg10 | 0.855440  | -1.642210 | -1.481683 |
| Mg11 | 0.536827  | -1.625090 | 1.554036  |
| Mg12 | 3.147648  | 3.017688  | 0.204758  |

@mg12-isomer27 bp86/6-31G(d) Etot=-2401.053071 Eb=-11.33

|     |           |           |           |
|-----|-----------|-----------|-----------|
| Mg1 | -1.312027 | -1.225493 | 2.077838  |
| Mg2 | -3.025063 | -2.937234 | -0.171522 |
| Mg3 | -3.594900 | 2.356317  | 0.446853  |
| Mg4 | 0.391348  | -0.279547 | -2.655763 |
| Mg5 | -2.063807 | -0.175433 | -0.744396 |
| Mg6 | 1.640450  | -0.479463 | 1.875299  |
| Mg7 | 1.790909  | 1.477252  | -0.456761 |
| Mg8 | 3.006570  | -1.356063 | -0.889038 |

|      |           |           |           |
|------|-----------|-----------|-----------|
| Mg9  | -0.893429 | 2.448533  | -1.458436 |
| Mg10 | 0.118543  | -2.300107 | -0.345200 |
| Mg11 | 4.537956  | 0.755154  | 0.750600  |
| Mg12 | -0.596550 | 1.716085  | 1.570526  |

@mg12-isomer28 bp86/6-31G(d) Etot=-2401.052825 Eb=-11.31

|      |           |           |           |
|------|-----------|-----------|-----------|
| Mg1  | -3.694283 | 1.657316  | 0.648938  |
| Mg2  | -1.081965 | 0.000184  | 1.525592  |
| Mg3  | -0.557974 | 2.358339  | -0.384603 |
| Mg4  | 1.488124  | 1.590929  | 1.757495  |
| Mg5  | -2.381093 | -0.000106 | -1.433945 |
| Mg6  | 4.068972  | -0.000021 | 0.814262  |
| Mg7  | 2.301099  | 1.627888  | -1.099517 |
| Mg8  | 1.488042  | -1.590592 | 1.757637  |
| Mg9  | 2.301010  | -1.628158 | -1.099377 |
| Mg10 | -3.694258 | -1.657231 | 0.649129  |
| Mg11 | -0.558070 | -2.358413 | -0.384184 |
| Mg12 | 0.320398  | -0.000134 | -2.751426 |

@mg12-isomer29 bp86/6-31G(d) Etot=-2401.052191 Eb=-11.28

|      |           |           |           |
|------|-----------|-----------|-----------|
| Mg1  | -0.668962 | -1.143662 | 1.563433  |
| Mg2  | 0.292546  | 1.708982  | -0.337109 |
| Mg3  | -2.078388 | 2.557019  | -2.034153 |
| Mg4  | -0.947709 | -3.131212 | -0.621964 |
| Mg5  | -2.708839 | 1.317435  | 0.659886  |
| Mg6  | 2.208852  | 0.217809  | 1.585983  |
| Mg7  | 3.484287  | 1.537106  | -0.919817 |
| Mg8  | 4.469627  | -1.281066 | -0.159541 |
| Mg9  | 1.451733  | -1.179090 | -1.133501 |
| Mg10 | -3.560335 | -1.758619 | 0.402776  |
| Mg11 | -0.401555 | 1.553754  | 2.756156  |
| Mg12 | -1.541256 | -0.398456 | -1.762148 |

@mg12-isomer30 bp86/6-31G(d) Etot=-2401.052099 Eb=-11.27

|      |           |           |           |
|------|-----------|-----------|-----------|
| Mg1  | 0.939004  | 0.694414  | -1.076962 |
| Mg2  | 0.693220  | 2.167077  | 1.740895  |
| Mg3  | -1.448931 | 0.076307  | 1.281729  |
| Mg4  | -3.589771 | -2.001190 | 0.206830  |
| Mg5  | 1.186622  | -0.958289 | 2.294769  |
| Mg6  | -0.339314 | -2.440821 | -0.079319 |
| Mg7  | -1.368376 | 2.553663  | -0.691181 |
| Mg8  | 2.742682  | -1.934629 | -0.251906 |
| Mg9  | 3.766535  | 0.233106  | -2.148413 |
| Mg10 | -1.884342 | -0.363491 | -1.836781 |
| Mg11 | 3.449687  | 0.856220  | 0.836403  |
| Mg12 | -4.147016 | 1.117632  | -0.276064 |

@mg12-isomer31 bp86/6-31G(d) Etot=-2401.052001 Eb=-11.27

|      |           |           |           |
|------|-----------|-----------|-----------|
| Mg1  | 1.716042  | 0.276739  | 1.385507  |
| Mg2  | -1.255812 | -0.820060 | 1.043618  |
| Mg3  | 1.177873  | -2.627404 | 1.709267  |
| Mg4  | -0.220939 | 1.373611  | -1.170151 |
| Mg5  | -4.495845 | -1.327202 | 0.133841  |
| Mg6  | -2.194590 | -0.828209 | -1.921040 |
| Mg7  | -0.569364 | 2.141101  | 1.851245  |
| Mg8  | -3.279709 | 1.550176  | 0.002599  |
| Mg9  | 2.061668  | 2.952960  | 0.122940  |
| Mg10 | 3.648274  | -1.745929 | -0.068268 |
| Mg11 | 2.683109  | 0.708138  | -1.863864 |
| Mg12 | 0.729293  | -1.653920 | -1.225693 |

@mg12-isomer32 bp86/6-31G(d) Etot=-2401.051954 Eb=-11.27

|     |           |          |           |
|-----|-----------|----------|-----------|
| Mg1 | 0.328960  | 2.070283 | 1.911474  |
| Mg2 | -0.578576 | 1.843420 | -1.091674 |

|      |           |           |           |
|------|-----------|-----------|-----------|
| Mg3  | 2.443563  | 0.081139  | 1.147214  |
| Mg4  | -2.434163 | 0.702512  | 1.216451  |
| Mg5  | -0.155042 | -1.028122 | 2.402753  |
| Mg6  | -1.229237 | -1.277279 | -0.868599 |
| Mg7  | 2.315784  | 2.580979  | -0.537807 |
| Mg8  | -4.327487 | -1.660703 | 0.004285  |
| Mg9  | 4.237523  | -1.480555 | -0.759505 |
| Mg10 | -3.487176 | 0.884991  | -1.594390 |
| Mg11 | 1.323509  | -2.547813 | 0.066823  |
| Mg12 | 1.562343  | -0.168851 | -1.897024 |

@mg12-isomer33 bp86/6-31G(d) Etot=-2401.051950 Eb=-11.27

|      |           |           |           |
|------|-----------|-----------|-----------|
| Mg1  | -2.605901 | 2.151121  | 0.163763  |
| Mg2  | -1.447168 | -0.047698 | 1.968287  |
| Mg3  | 0.414252  | 2.064976  | 0.844729  |
| Mg4  | -4.232395 | -0.743131 | 0.864821  |
| Mg5  | -2.302137 | -0.455511 | -1.378416 |
| Mg6  | 1.281903  | -1.152153 | 1.034414  |
| Mg7  | -0.387071 | 1.719690  | -2.166105 |
| Mg8  | 2.439672  | 0.818178  | -1.220155 |
| Mg9  | 3.404206  | 1.236142  | 1.549559  |
| Mg10 | -1.224406 | -2.661181 | 0.349835  |
| Mg11 | 0.432384  | -1.463597 | -2.075903 |
| Mg12 | 4.226661  | -1.466837 | 0.065170  |

@mg12-isomer34 bp86/6-31G(d) Etot=-2401.051860 Eb=-11.26

|      |           |           |           |
|------|-----------|-----------|-----------|
| Mg1  | 0.375569  | 0.632518  | -1.581020 |
| Mg2  | 2.915981  | 0.864617  | 0.000040  |
| Mg3  | -2.343236 | -0.737678 | 1.551098  |
| Mg4  | 1.605578  | -1.841690 | 0.000268  |
| Mg5  | 0.079457  | -2.235945 | -2.626622 |
| Mg6  | 0.375362  | 0.632814  | 1.580841  |
| Mg7  | -3.416226 | 4.714650  | 0.000007  |
| Mg8  | 0.079010  | -2.235403 | 2.627011  |
| Mg9  | -1.143316 | -3.170185 | 0.000175  |
| Mg10 | -1.961278 | 1.864405  | -0.000380 |
| Mg11 | 5.776096  | 2.249904  | 0.000011  |
| Mg12 | -2.342999 | -0.738007 | -1.551429 |

@mg12-isomer35 bp86/6-31G(d) Etot=-2401.051624 Eb=-11.25

|      |           |           |           |
|------|-----------|-----------|-----------|
| Mg1  | 6.162241  | 0.323069  | 0.000655  |
| Mg2  | 3.006542  | -0.025035 | -0.026384 |
| Mg3  | 0.456100  | 1.493738  | -0.463464 |
| Mg4  | -1.173912 | 4.301231  | 0.065418  |
| Mg5  | 0.740660  | -1.528125 | -1.361878 |
| Mg6  | -1.086384 | 0.393844  | -2.903488 |
| Mg7  | 0.702197  | -0.909400 | 1.696840  |
| Mg8  | -1.063583 | 1.568842  | 2.205877  |
| Mg9  | -0.567857 | -3.622275 | 0.623787  |
| Mg10 | -2.585414 | 1.098652  | -0.345851 |
| Mg11 | -2.295179 | -1.872610 | -1.253632 |
| Mg12 | -2.295410 | -1.221931 | 1.762119  |

@mg12-isomer36 bp86/6-31G(d) Etot=-2401.051098 Eb=-11.22

|      |           |           |           |
|------|-----------|-----------|-----------|
| Mg1  | 0.000208  | 0.415143  | 3.545145  |
| Mg2  | 1.691810  | -0.321549 | 1.164527  |
| Mg3  | -1.691654 | -0.321650 | 1.164755  |
| Mg4  | -2.748062 | 2.272951  | -0.426048 |
| Mg5  | 3.277023  | -2.892369 | -0.140167 |
| Mg6  | -3.277071 | -2.892275 | -0.140086 |
| Mg7  | 0.000004  | -2.480187 | -0.317295 |
| Mg8  | -0.000024 | 2.334789  | 1.154255  |
| Mg9  | 1.600741  | -0.349615 | -1.844673 |
| Mg10 | -1.600869 | -0.349636 | -1.844488 |

|                                                          |           |           |           |
|----------------------------------------------------------|-----------|-----------|-----------|
| Mg11                                                     | 2.747981  | 2.273074  | -0.426188 |
| Mg12                                                     | -0.000086 | 2.311325  | -1.889737 |
| @mg12-isomer37 bp86/6-31G(d) Etot=-2401.050853 Eb=-11.21 |           |           |           |
| Mg1                                                      | 0.000034  | 1.105390  | 1.399636  |
| Mg2                                                      | -1.568142 | -1.082846 | -2.046004 |
| Mg3                                                      | -2.653223 | 1.061460  | -0.159876 |
| Mg4                                                      | 0.000032  | 1.569398  | -1.588923 |
| Mg5                                                      | -5.461061 | 2.564205  | 0.099158  |
| Mg6                                                      | -0.000012 | -3.439642 | -0.919522 |
| Mg7                                                      | 1.603022  | -1.610538 | 0.943698  |
| Mg8                                                      | -1.603064 | -1.610480 | 0.943564  |
| Mg9                                                      | 2.653288  | 1.061396  | -0.159846 |
| Mg10                                                     | 1.568113  | -1.082885 | -2.045860 |
| Mg11                                                     | -0.000140 | -1.099596 | 3.434830  |
| Mg12                                                     | 5.461155  | 2.564138  | 0.099146  |
| @mg12-isomer38 bp86/6-31G(d) Etot=-2401.050506 Eb=-11.19 |           |           |           |
| Mg1                                                      | -4.865934 | 0.268859  | -0.867740 |
| Mg2                                                      | -1.809792 | 0.504847  | -2.341302 |
| Mg3                                                      | -1.899939 | 1.900090  | 0.330612  |
| Mg4                                                      | 0.752183  | 1.909940  | -1.377148 |
| Mg5                                                      | -2.060515 | -1.146156 | 0.236826  |
| Mg6                                                      | 0.915239  | 1.766714  | 1.699106  |
| Mg7                                                      | 0.685624  | -1.098720 | -1.516913 |
| Mg8                                                      | -1.495423 | 0.302763  | 2.890967  |
| Mg9                                                      | 0.809906  | -1.271258 | 1.603783  |
| Mg10                                                     | -0.281759 | -3.554129 | -0.068865 |
| Mg11                                                     | 3.060583  | 0.297354  | 0.054316  |
| Mg12                                                     | 6.189827  | 0.119695  | -0.643642 |
| @mg12-isomer39 bp86/6-31G(d) Etot=-2401.050498 Eb=-11.19 |           |           |           |
| Mg1                                                      | -3.135108 | 1.689623  | -0.087609 |
| Mg2                                                      | 2.225436  | 2.547357  | 1.980868  |
| Mg3                                                      | 2.997943  | -0.165784 | 0.902124  |
| Mg4                                                      | -0.546155 | 1.435263  | -2.418957 |
| Mg5                                                      | -1.686329 | -1.095900 | -0.981153 |
| Mg6                                                      | 0.482456  | -2.150937 | 1.025659  |
| Mg7                                                      | 1.287834  | -0.920749 | -1.788302 |
| Mg8                                                      | -0.061911 | 1.079163  | 0.714747  |
| Mg9                                                      | -4.715659 | -0.947446 | 0.095962  |
| Mg10                                                     | 2.204665  | 2.138327  | -1.054869 |
| Mg11                                                     | -2.244873 | -0.678327 | 2.000535  |
| Mg12                                                     | 3.191701  | -2.930588 | -0.389006 |
| @mg12-isomer40 bp86/6-31G(d) Etot=-2401.050470 Eb=-11.19 |           |           |           |
| Mg1                                                      | -0.235297 | 1.366498  | 1.216916  |
| Mg2                                                      | 8.556894  | -0.000143 | -0.000179 |
| Mg3                                                      | -3.299101 | 1.343194  | 1.197698  |
| Mg4                                                      | 5.247224  | -0.000045 | 0.000410  |
| Mg5                                                      | -3.298652 | -1.710137 | 0.564991  |
| Mg6                                                      | -0.234933 | -1.736461 | 0.573848  |
| Mg7                                                      | -3.298207 | 0.364638  | -1.762466 |
| Mg8                                                      | -0.234229 | 0.372012  | -1.791671 |
| Mg9                                                      | -1.784813 | -2.262926 | -2.017144 |
| Mg10                                                     | 2.153378  | 0.000317  | 0.000924  |
| Mg11                                                     | -1.785429 | -0.615184 | 2.968123  |
| Mg12                                                     | -1.786835 | 2.878237  | -0.951450 |
| @mg12-isomer41 bp86/6-31G(d) Etot=-2401.050179 Eb=-11.17 |           |           |           |
| Mg1                                                      | -0.807670 | 2.919763  | 0.000070  |
| Mg2                                                      | 1.636714  | 1.675436  | -1.544466 |
| Mg3                                                      | -2.294434 | 0.257836  | -0.000092 |
| Mg4                                                      | 0.203340  | -0.996193 | -1.568963 |

|      |           |           |           |
|------|-----------|-----------|-----------|
| Mg5  | 1.636632  | 1.675316  | 1.544688  |
| Mg6  | -1.726106 | -2.673962 | -0.000207 |
| Mg7  | -4.946071 | -2.118350 | 0.000088  |
| Mg8  | -1.227792 | 1.479012  | 2.634666  |
| Mg9  | 2.849874  | -0.634939 | 0.000020  |
| Mg10 | 0.203230  | -0.996314 | 1.568812  |
| Mg11 | -1.227645 | 1.479244  | -2.634657 |
| Mg12 | 5.699928  | -2.066849 | 0.000041  |

@mg12-isomer42 bp86/6-31G(d) Etot=-2401.050046 Eb=-11.17

|      |           |           |           |
|------|-----------|-----------|-----------|
| Mg1  | -3.338341 | -2.791339 | 0.307986  |
| Mg2  | -1.131196 | -1.631923 | -1.593349 |
| Mg3  | -3.163433 | 0.246143  | 0.051132  |
| Mg4  | -2.471349 | 3.129135  | -0.453320 |
| Mg5  | -0.757282 | -1.458302 | 1.496393  |
| Mg6  | 0.918437  | 0.178850  | -3.127390 |
| Mg7  | 0.001274  | 1.363710  | -0.595837 |
| Mg8  | -1.161781 | 1.696074  | 2.088526  |
| Mg9  | 1.708508  | -1.474869 | -0.471761 |
| Mg10 | 1.722968  | 0.409022  | 1.997079  |
| Mg11 | 3.250735  | 1.376891  | -0.628805 |
| Mg12 | 4.421460  | -1.043393 | 0.929346  |

@mg12-isomer43 bp86/6-31G(d) Etot=-2401.049983 Eb=-11.16

|      |           |           |           |
|------|-----------|-----------|-----------|
| Mg1  | -0.124542 | 0.385854  | -0.000099 |
| Mg2  | 2.148394  | -0.960540 | 1.560930  |
| Mg3  | -1.010742 | -1.232011 | 2.561835  |
| Mg4  | 2.148366  | -0.961125 | -1.560693 |
| Mg5  | -1.010754 | -1.232752 | -2.561528 |
| Mg6  | -0.643283 | 3.222898  | -0.000184 |
| Mg7  | 2.513947  | 2.188247  | -0.000167 |
| Mg8  | -2.747563 | 1.278477  | -1.513709 |
| Mg9  | -2.747655 | 1.278751  | 1.513311  |
| Mg10 | -0.140636 | -2.662282 | 0.000370  |
| Mg11 | 4.604080  | 0.132508  | -0.000142 |
| Mg12 | -2.989612 | -1.438025 | 0.000078  |

@mg12-isomer44 bp86/6-31G(d) Etot=-2401.049971 Eb=-11.16

|      |           |           |           |
|------|-----------|-----------|-----------|
| Mg1  | 1.249699  | 0.345855  | 2.173239  |
| Mg2  | -1.261481 | -1.463179 | 2.175451  |
| Mg3  | -2.759353 | -0.559805 | -0.343310 |
| Mg4  | -1.390903 | 1.579689  | 1.411651  |
| Mg5  | -4.433268 | 1.917058  | 0.334740  |
| Mg6  | 1.043142  | 1.274788  | -0.755526 |
| Mg7  | -1.722324 | 1.948220  | -1.663414 |
| Mg8  | -1.473063 | -3.205861 | -0.558055 |
| Mg9  | 3.655181  | -0.332289 | -0.020380 |
| Mg10 | 1.041534  | -1.750595 | -0.002449 |
| Mg11 | 6.534722  | 1.044874  | -0.231514 |
| Mg12 | -0.483886 | -0.798754 | -2.520432 |

@mg12-isomer45 bp86/6-31G(d) Etot=-2401.049949 Eb=-11.16

|      |           |           |           |
|------|-----------|-----------|-----------|
| Mg1  | 2.382151  | 1.188195  | -1.743040 |
| Mg2  | 1.711749  | -0.006814 | 0.925865  |
| Mg3  | 4.881682  | 1.586991  | 0.265610  |
| Mg4  | -0.551632 | -1.421599 | 2.362403  |
| Mg5  | -0.668548 | 1.632594  | 2.093516  |
| Mg6  | 1.404844  | -3.219281 | 0.672313  |
| Mg7  | 0.694420  | -1.333765 | -1.734769 |
| Mg8  | -0.494593 | 1.469358  | -0.946783 |
| Mg9  | -2.807018 | 3.510098  | 0.157155  |
| Mg10 | -1.561837 | -2.749471 | -0.250935 |
| Mg11 | -2.730090 | 0.018142  | 0.551076  |
| Mg12 | -2.261128 | -0.674447 | -2.352410 |

@mg12-isomer46 bp86/6-31G(d) Etot=-2401.049784 Eb=-11.15

|      |           |           |           |
|------|-----------|-----------|-----------|
| Mg1  | 2.931553  | 2.541232  | -0.000011 |
| Mg2  | -2.528519 | 0.180446  | -1.806360 |
| Mg3  | -1.565246 | 0.111734  | 1.203631  |
| Mg4  | -0.111770 | -1.565473 | -1.203876 |
| Mg5  | 0.111690  | 1.565335  | -1.203752 |
| Mg6  | -2.541194 | 2.931327  | -0.000010 |
| Mg7  | 0.180421  | 2.528332  | 1.806498  |
| Mg8  | -2.931420 | -2.540964 | 0.000126  |
| Mg9  | 1.565440  | -0.111716 | 1.203595  |
| Mg10 | 2.541104  | -2.931546 | 0.000025  |
| Mg11 | -0.180487 | -2.528277 | 1.806501  |
| Mg12 | 2.528428  | -0.180431 | -1.806367 |

@mg12-isomer47 bp86/6-31G(d) Etot=-2401.049397 Eb=-11.13

|      |           |           |           |
|------|-----------|-----------|-----------|
| Mg1  | 3.765292  | -1.713550 | -0.040059 |
| Mg2  | -2.094892 | 0.646023  | 0.944892  |
| Mg3  | 2.799947  | 1.128159  | -0.759211 |
| Mg4  | -1.451940 | -1.620650 | -1.336338 |
| Mg5  | 3.062826  | 0.431474  | 2.143822  |
| Mg6  | 0.518971  | 2.272070  | 1.132768  |
| Mg7  | 0.744993  | -0.894437 | 0.687337  |
| Mg8  | -4.299141 | -1.447417 | 0.095247  |
| Mg9  | -0.274957 | 1.343585  | -1.727730 |
| Mg10 | -1.789794 | -2.340411 | 1.660335  |
| Mg11 | -2.380484 | 3.348001  | -0.390228 |
| Mg12 | 1.399178  | -1.152847 | -2.410835 |

@mg12-isomer48 bp86/6-31G(d) Etot=-2401.048791 Eb=-11.10

|      |           |           |           |
|------|-----------|-----------|-----------|
| Mg1  | -1.287562 | 0.734265  | -1.334423 |
| Mg2  | -1.525402 | -0.016337 | 1.666883  |
| Mg3  | 0.174429  | 2.489540  | 1.040671  |
| Mg4  | -3.916940 | 1.873741  | 0.208860  |
| Mg5  | -0.702515 | -2.153193 | -0.382712 |
| Mg6  | 1.662167  | -0.057889 | 0.652333  |
| Mg7  | 1.586195  | 1.896299  | -1.674304 |
| Mg8  | 2.437239  | -2.819930 | -0.272922 |
| Mg9  | 0.989576  | -1.012699 | -2.590206 |
| Mg10 | 0.695398  | -2.215425 | 2.393615  |
| Mg11 | 3.563536  | 2.421144  | 0.746133  |
| Mg12 | -3.676121 | -1.139516 | -0.453930 |

@mg12-isomer49 bp86/6-31G(d) Etot=-2401.048744 Eb=-11.10

|      |           |           |           |
|------|-----------|-----------|-----------|
| Mg1  | 0.736105  | 0.495809  | -3.033856 |
| Mg2  | 1.987151  | 0.936580  | 0.049177  |
| Mg3  | -0.884410 | 1.763110  | -0.933351 |
| Mg4  | 0.837284  | -1.706468 | -1.083467 |
| Mg5  | 4.881021  | 2.350552  | 0.264163  |
| Mg6  | -2.066387 | -0.880783 | -2.003295 |
| Mg7  | -0.317515 | 1.823049  | 2.009112  |
| Mg8  | -3.175459 | 3.054431  | 0.586816  |
| Mg9  | -1.563140 | -2.844386 | 0.361119  |
| Mg10 | -2.540737 | -0.070924 | 0.975738  |
| Mg11 | 1.663696  | -3.850331 | 0.893298  |
| Mg12 | 0.442392  | -1.070639 | 1.914547  |

@mg12-isomer50 bp86/6-31G(d) Etot=-2401.048601 Eb=-11.09

|     |           |           |           |
|-----|-----------|-----------|-----------|
| Mg1 | -0.330704 | 1.857717  | 1.550650  |
| Mg2 | -0.435425 | -1.172085 | -1.586635 |
| Mg3 | -3.055554 | 1.980946  | 0.000085  |
| Mg4 | -3.225167 | -1.060965 | -0.000174 |
| Mg5 | -2.815132 | 0.458000  | 2.625642  |
| Mg6 | 1.784044  | 0.272275  | 0.000067  |



|                                                          |           |           |           |
|----------------------------------------------------------|-----------|-----------|-----------|
| Mg7                                                      | 4.896490  | 0.110114  | 0.000036  |
| Mg8                                                      | -2.814966 | 0.458377  | -2.625710 |
| Mg9                                                      | -1.465183 | -3.500668 | -0.000130 |
| Mg10                                                     | 8.227717  | -0.089382 | -0.000045 |
| Mg11                                                     | -0.330665 | 1.857897  | -1.550335 |
| Mg12                                                     | -0.435455 | -1.172225 | 1.586547  |
| @mg12-isomer51 bp86/6-31G(d) Etot=-2401.048595 Eb=-11.09 |           |           |           |
| Mg1                                                      | 0.658015  | 2.015990  | -0.940956 |
| Mg2                                                      | -1.988475 | 0.503799  | -0.658427 |
| Mg3                                                      | -1.635211 | -1.312539 | 2.008295  |
| Mg4                                                      | -1.363516 | -2.477812 | -0.859114 |
| Mg5                                                      | 1.005094  | -1.136419 | 0.518612  |
| Mg6                                                      | 2.778277  | 1.147306  | 1.376121  |
| Mg7                                                      | -2.147221 | 3.419332  | -0.159743 |
| Mg8                                                      | 3.043464  | 0.024775  | -1.460118 |
| Mg9                                                      | 0.157674  | -0.422260 | -2.736850 |
| Mg10                                                     | 4.159904  | -1.696631 | 0.810561  |
| Mg11                                                     | -0.382220 | 1.592202  | 1.856135  |
| Mg12                                                     | -4.285785 | -1.657744 | 0.245484  |
| @mg12-isomer52 bp86/6-31G(d) Etot=-2401.048396 Eb=-11.08 |           |           |           |
| Mg1                                                      | -1.121024 | -1.336162 | -0.992918 |
| Mg2                                                      | -4.187852 | -0.525356 | -0.745522 |
| Mg3                                                      | 2.037681  | 0.921628  | 0.965843  |
| Mg4                                                      | 1.214868  | 0.827557  | -1.975418 |
| Mg5                                                      | -1.739498 | 1.494482  | -2.013377 |
| Mg6                                                      | -0.126416 | -1.266618 | 1.957015  |
| Mg7                                                      | 1.815664  | -1.819270 | -0.416001 |
| Mg8                                                      | -0.042645 | 1.784244  | 2.911846  |
| Mg9                                                      | -0.071701 | -4.379725 | 0.429397  |
| Mg10                                                     | 0.060840  | 3.189795  | -0.085102 |
| Mg11                                                     | 4.284797  | 0.169525  | -0.970249 |
| Mg12                                                     | -2.124714 | 0.939900  | 0.934486  |
| @mg12-isomer53 bp86/6-31G(d) Etot=-2401.048347 Eb=-11.08 |           |           |           |
| Mg1                                                      | 1.844079  | -1.857351 | 0.320608  |
| Mg2                                                      | -1.166551 | -2.213946 | 0.200563  |
| Mg3                                                      | 0.111342  | -0.759266 | -2.264003 |
| Mg4                                                      | 2.605080  | 0.991388  | -1.046508 |
| Mg5                                                      | -1.892483 | 2.820829  | 0.893876  |
| Mg6                                                      | -2.507035 | 0.495533  | -1.004777 |
| Mg7                                                      | 0.175072  | 0.683686  | 1.023534  |
| Mg8                                                      | -2.713167 | 0.016509  | 1.979053  |
| Mg9                                                      | -4.216761 | -2.016355 | -0.186534 |
| Mg10                                                     | 4.786849  | -1.097082 | -0.054402 |
| Mg11                                                     | -0.200475 | 2.287732  | -1.783349 |
| Mg12                                                     | 3.174051  | 0.648323  | 1.921938  |
| @mg12-isomer54 bp86/6-31G(d) Etot=-2401.047778 Eb=-11.05 |           |           |           |
| Mg1                                                      | 1.800950  | -0.695675 | 1.402771  |
| Mg2                                                      | 3.589882  | 1.754815  | 1.806554  |
| Mg3                                                      | -0.630025 | -2.352832 | 0.594931  |
| Mg4                                                      | -0.982606 | 0.817187  | 1.012058  |
| Mg5                                                      | 2.245897  | -2.796845 | -0.868182 |
| Mg6                                                      | 0.409726  | -0.494991 | -1.783162 |
| Mg7                                                      | -2.833891 | -0.918022 | -1.155147 |
| Mg8                                                      | -3.414917 | -1.074497 | 1.793764  |
| Mg9                                                      | -1.319104 | 1.998335  | -1.814202 |
| Mg10                                                     | 3.696419  | 0.054662  | -0.867307 |
| Mg11                                                     | -3.983779 | 1.544671  | 0.207868  |
| Mg12                                                     | 1.421447  | 2.163189  | -0.329946 |
| @mg12-isomer55 bp86/6-31G(d) Etot=-2401.047698 Eb=-11.04 |           |           |           |

|      |           |           |           |
|------|-----------|-----------|-----------|
| Mg1  | -3.474420 | -2.075563 | -0.320030 |
| Mg2  | 1.409524  | 1.605124  | -1.320281 |
| Mg3  | 2.856279  | 2.220464  | 1.303620  |
| Mg4  | -1.679316 | 2.737061  | -1.530213 |
| Mg5  | 3.959219  | -0.063594 | -0.500343 |
| Mg6  | -1.123580 | -0.236877 | -1.327771 |
| Mg7  | 1.310889  | -0.552232 | 0.998690  |
| Mg8  | -0.543830 | 2.084601  | 1.152474  |
| Mg9  | -3.497772 | 1.119840  | 0.379771  |
| Mg10 | -1.693774 | -0.993507 | 1.833768  |
| Mg11 | -0.325610 | -2.953494 | -0.183369 |
| Mg12 | 2.802391  | -2.891822 | -0.486315 |

@mg12-isomer56 bp86/6-31G(d) Etot=-2401.047654 Eb=-11.04

|      |           |           |           |
|------|-----------|-----------|-----------|
| Mg1  | 1.069901  | 0.159833  | 1.063379  |
| Mg2  | -1.217506 | -1.837978 | -0.133236 |
| Mg3  | -4.159536 | -1.339548 | 0.852508  |
| Mg4  | 1.568365  | -1.551583 | -1.477641 |
| Mg5  | 2.808161  | 1.326683  | -1.577473 |
| Mg6  | 1.430456  | -2.727831 | 1.384744  |
| Mg7  | -0.313337 | 0.713882  | -2.158978 |
| Mg8  | -3.436196 | 0.057930  | -1.843021 |
| Mg9  | 0.553308  | 2.899563  | -0.106164 |
| Mg10 | -2.071127 | 1.156151  | 0.586534  |
| Mg11 | -0.229990 | 2.064229  | 2.921884  |
| Mg12 | 3.997502  | -0.921330 | 0.487464  |

@mg12-isomer57 bp86/6-31G(d) Etot=-2401.047594 Eb=-11.04

|      |           |           |           |
|------|-----------|-----------|-----------|
| Mg1  | -1.794177 | -0.000061 | -1.972337 |
| Mg2  | -3.295586 | -2.363381 | -0.104684 |
| Mg3  | 1.445510  | -0.000029 | -1.453864 |
| Mg4  | -0.012542 | -0.000131 | 3.618326  |
| Mg5  | -0.277905 | 2.522179  | -0.950287 |
| Mg6  | 1.489716  | 1.569299  | 1.435350  |
| Mg7  | -1.349815 | -0.000130 | 0.952540  |
| Mg8  | 2.938896  | -2.775161 | -0.953003 |
| Mg9  | -0.277914 | -2.522162 | -0.949839 |
| Mg10 | 1.490362  | -1.568827 | 1.435247  |
| Mg11 | -3.295435 | 2.363363  | -0.104603 |
| Mg12 | 2.938889  | 2.775042  | -0.952846 |

@mg12-isomer58 bp86/6-31G(d) Etot=-2401.047389 Eb=-11.03

|      |           |           |           |
|------|-----------|-----------|-----------|
| Mg1  | -0.418344 | -2.155852 | 0.441405  |
| Mg2  | 1.233799  | 0.062792  | -1.214806 |
| Mg3  | -0.427400 | 1.112923  | 1.274878  |
| Mg4  | -3.268165 | -0.527072 | 1.295751  |
| Mg5  | -0.269074 | 2.811104  | -1.207594 |
| Mg6  | 2.660987  | -2.731805 | -0.525477 |
| Mg7  | -3.061918 | 2.512234  | 0.212444  |
| Mg8  | 4.282469  | 0.016931  | -0.332387 |
| Mg9  | -2.043937 | 0.035084  | -1.378514 |
| Mg10 | -3.228736 | -2.836463 | -0.675746 |
| Mg11 | 2.122306  | -0.750015 | 1.660913  |
| Mg12 | 2.418012  | 2.450139  | 0.449132  |

@mg12-isomer59 bp86/6-31G(d) Etot=-2401.047004 Eb=-11.01

|     |           |           |           |
|-----|-----------|-----------|-----------|
| Mg1 | -0.368327 | -2.540200 | -0.000015 |
| Mg2 | 1.268511  | -0.313135 | -1.500015 |
| Mg3 | -0.377448 | 2.459742  | 1.530137  |
| Mg4 | -2.075737 | -0.370237 | 1.536007  |
| Mg5 | -0.377488 | 2.459745  | -1.530118 |
| Mg6 | 2.770176  | -2.756728 | -0.000035 |
| Mg7 | -3.070306 | 2.122372  | 0.000001  |
| Mg8 | 4.242700  | -0.121260 | -0.000033 |

|      |           |           |           |
|------|-----------|-----------|-----------|
| Mg9  | -2.075827 | -0.370277 | -1.536054 |
| Mg10 | -3.613876 | -2.567660 | 0.000058  |
| Mg11 | 1.268570  | -0.313199 | 1.500066  |
| Mg12 | 2.409052  | 2.310837  | 0.000001  |

@mg12-isomer60 bp86/6-31G(d) Etot=-2401.046994 Eb=-11.01

|      |           |           |           |
|------|-----------|-----------|-----------|
| Mg1  | -4.143602 | -1.506840 | 0.691919  |
| Mg2  | -2.182824 | -0.782304 | -1.542819 |
| Mg3  | -3.125752 | 1.441549  | 0.536868  |
| Mg4  | -0.281985 | 2.334997  | 1.835359  |
| Mg5  | 1.388699  | -2.572761 | 1.666106  |
| Mg6  | 0.106126  | 0.051472  | -3.544684 |
| Mg7  | 1.978477  | 0.377916  | 1.134298  |
| Mg8  | -1.084220 | -0.735047 | 1.421464  |
| Mg9  | 0.872539  | -1.588753 | -1.117641 |
| Mg10 | 2.566280  | 3.088879  | -0.060702 |
| Mg11 | -0.128357 | 1.649015  | -1.033254 |
| Mg12 | 4.034621  | -1.758123 | 0.013085  |

@mg12-isomer61 bp86/6-31G(d) Etot=-2401.046915 Eb=-11.00

|      |           |           |           |
|------|-----------|-----------|-----------|
| Mg1  | 3.314265  | -1.504511 | -0.757853 |
| Mg2  | 0.302757  | -0.000078 | -2.122848 |
| Mg3  | 0.882050  | 0.000131  | 1.133553  |
| Mg4  | -2.353725 | 1.620210  | -1.304157 |
| Mg5  | 3.918566  | 0.000110  | 1.904754  |
| Mg6  | 0.347893  | -2.616262 | -0.388998 |
| Mg7  | -1.791773 | -1.637393 | 1.668937  |
| Mg8  | -2.353656 | -1.620449 | -1.304062 |
| Mg9  | -4.136414 | -0.000044 | 0.649030  |
| Mg10 | 0.347747  | 2.616310  | -0.389220 |
| Mg11 | 3.314177  | 1.504443  | -0.758002 |
| Mg12 | -1.791886 | 1.637532  | 1.668866  |

@mg12-isomer62 bp86/6-31G(d) Etot=-2401.046844 Eb=-11.00

|      |           |           |           |
|------|-----------|-----------|-----------|
| Mg1  | -2.702998 | -0.870880 | -1.562138 |
| Mg2  | -1.080782 | -2.860869 | -0.000371 |
| Mg3  | -3.787634 | 1.621439  | -0.000105 |
| Mg4  | -1.183240 | 2.045494  | 1.547954  |
| Mg5  | 0.539614  | -0.663122 | -1.535970 |
| Mg6  | 1.488475  | 1.949896  | 0.000527  |
| Mg7  | -1.182913 | 2.046035  | -1.547452 |
| Mg8  | 3.525233  | -0.691459 | 0.000356  |
| Mg9  | 0.539283  | -0.663593 | 1.536288  |
| Mg10 | 4.524246  | 2.215647  | -0.000496 |
| Mg11 | 2.024063  | -3.257221 | -0.000124 |
| Mg12 | -2.703348 | -0.871368 | 1.561531  |

@mg12-isomer63 bp86/6-31G(d) Etot=-2401.046822 Eb=-11.00

|      |           |           |           |
|------|-----------|-----------|-----------|
| Mg1  | -0.805825 | -2.905898 | -0.070809 |
| Mg2  | -0.907786 | -0.994545 | -2.572045 |
| Mg3  | 1.013358  | -0.627047 | 1.569482  |
| Mg4  | 0.880002  | 1.237744  | -0.892090 |
| Mg5  | -1.219061 | 1.561097  | 1.416918  |
| Mg6  | -1.669120 | -1.360344 | 2.564996  |
| Mg7  | -2.753243 | -0.645179 | -0.185757 |
| Mg8  | 1.767467  | -1.683759 | -1.255272 |
| Mg9  | -1.936211 | 1.892059  | -1.586229 |
| Mg10 | 3.567912  | 0.246672  | 0.211917  |
| Mg11 | -4.484470 | 1.953656  | 0.411478  |
| Mg12 | 6.546977  | 1.325544  | 0.387411  |

@mg12-isomer64 bp86/6-31G(d) Etot=-2401.046707 Eb=-10.99

|     |           |           |          |
|-----|-----------|-----------|----------|
| Mg1 | -4.634102 | 1.464149  | 0.003868 |
| Mg2 | 1.130193  | -0.899750 | 1.867673 |

|      |           |           |           |
|------|-----------|-----------|-----------|
| Mg3  | -2.289135 | 0.511954  | -1.809932 |
| Mg4  | -0.487641 | -1.842755 | -0.703244 |
| Mg5  | 2.574566  | -1.111208 | -1.121595 |
| Mg6  | -1.734652 | 0.412324  | 1.235306  |
| Mg7  | 1.837243  | -3.482380 | 0.562952  |
| Mg8  | 0.503409  | 1.439646  | -0.688787 |
| Mg9  | 3.237425  | 1.414107  | 0.753670  |
| Mg10 | 0.650415  | 2.042221  | 2.411511  |
| Mg11 | 3.082241  | 1.671166  | -2.296201 |
| Mg12 | -3.869962 | -1.619475 | -0.215221 |

@mg12-isomer65 bp86/6-31G(d) Etot=-2401.046676 Eb=-10.99

|      |           |           |           |
|------|-----------|-----------|-----------|
| Mg1  | -2.378392 | 0.169383  | -1.875622 |
| Mg2  | 3.273827  | 0.149000  | 0.945932  |
| Mg3  | 0.950580  | 2.032373  | 1.806650  |
| Mg4  | 3.319460  | -0.329062 | -2.055786 |
| Mg5  | -4.528574 | 1.757949  | -0.199919 |
| Mg6  | -0.889457 | -2.209872 | -0.280118 |
| Mg7  | 0.720806  | -1.125143 | 2.235737  |
| Mg8  | 2.585139  | 2.544345  | -0.878788 |
| Mg9  | -4.089492 | -1.401856 | 0.085571  |
| Mg10 | -1.721523 | 0.601054  | 1.164465  |
| Mg11 | 2.186637  | -2.565133 | -0.030533 |
| Mg12 | 0.570990  | 0.376962  | -0.917588 |

@mg12-isomer66 bp86/6-31G(d) Etot=-2401.046122 Eb=-10.96

|      |           |           |           |
|------|-----------|-----------|-----------|
| Mg1  | -2.892592 | 0.756757  | 1.577123  |
| Mg2  | 1.873886  | -1.485538 | -1.527418 |
| Mg3  | -0.732477 | 2.641350  | -0.000077 |
| Mg4  | -0.484483 | -0.306923 | 0.000044  |
| Mg5  | -2.892748 | 0.756756  | -1.576923 |
| Mg6  | 0.262006  | 1.244460  | 2.569286  |
| Mg7  | 0.261774  | 1.244222  | -2.569402 |
| Mg8  | 2.210440  | 1.885313  | -0.000164 |
| Mg9  | -0.431835 | -3.194137 | -0.000046 |
| Mg10 | 1.873866  | -1.485563 | 1.527471  |
| Mg11 | 4.332736  | -0.184057 | 0.000047  |
| Mg12 | -3.380573 | -1.872640 | 0.000060  |

@mg12-isomer67 bp86/6-31G(d) Etot=-2401.046114 Eb=-10.96

|      |           |           |           |
|------|-----------|-----------|-----------|
| Mg1  | -0.010761 | 0.475206  | -1.072461 |
| Mg2  | 1.282433  | -2.326026 | -0.488821 |
| Mg3  | 4.141648  | -2.074488 | 0.419584  |
| Mg4  | -1.140298 | -1.260455 | 1.369594  |
| Mg5  | 1.817131  | 2.896463  | -0.016744 |
| Mg6  | -1.743336 | -2.227851 | -1.433889 |
| Mg7  | -4.150871 | -2.025815 | 0.357172  |
| Mg8  | 3.317455  | 0.413203  | -1.178750 |
| Mg9  | -3.196772 | 0.835469  | -0.052400 |
| Mg10 | -0.742769 | 1.960034  | 1.632331  |
| Mg11 | 1.936046  | 0.109359  | 1.482644  |
| Mg12 | -1.509907 | 3.224901  | -1.018260 |

@mg12-isomer68 bp86/6-31G(d) Etot=-2401.045967 Eb=-10.95

|      |           |           |           |
|------|-----------|-----------|-----------|
| Mg1  | 3.504907  | 0.322728  | -1.558312 |
| Mg2  | 0.666906  | 1.666857  | 2.558876  |
| Mg3  | 3.505006  | 0.322701  | 1.558205  |
| Mg4  | -1.003529 | 2.417208  | 0.000083  |
| Mg5  | 2.857829  | -2.315697 | -0.000040 |
| Mg6  | -1.594700 | -0.332755 | 1.790886  |
| Mg7  | -3.932884 | 1.189324  | -0.000057 |
| Mg8  | 0.666849  | 1.666940  | -2.558795 |
| Mg9  | -1.594740 | -0.332663 | -1.790824 |
| Mg10 | -0.445253 | -2.722118 | -0.000044 |

|                                                          |           |           |           |  |
|----------------------------------------------------------|-----------|-----------|-----------|--|
| Mg11                                                     | -3.533326 | -1.952602 | 0.000004  |  |
| Mg12                                                     | 0.902934  | 0.070075  | 0.000020  |  |
| @mg12-isomer69 bp86/6-31G(d) Etot=-2401.045585 Eb=-10.93 |           |           |           |  |
| Mg1                                                      | -3.954294 | -0.934532 | -1.305979 |  |
| Mg2                                                      | -1.042204 | -2.481775 | -0.819428 |  |
| Mg3                                                      | -1.391705 | 0.768520  | -1.320821 |  |
| Mg4                                                      | -2.452671 | -0.883562 | 1.335248  |  |
| Mg5                                                      | -3.691604 | 1.780347  | 0.330206  |  |
| Mg6                                                      | 1.391954  | -0.768721 | -1.321051 |  |
| Mg7                                                      | -0.520502 | 1.550726  | 1.780735  |  |
| Mg8                                                      | 0.520362  | -1.550526 | 1.780778  |  |
| Mg9                                                      | 3.954418  | 0.934517  | -1.305818 |  |
| Mg10                                                     | 3.691525  | -1.780384 | 0.330507  |  |
| Mg11                                                     | 1.042302  | 2.481780  | -0.819579 |  |
| Mg12                                                     | 2.452419  | 0.883611  | 1.335202  |  |
| @mg12-isomer70 bp86/6-31G(d) Etot=-2401.044049 Eb=-10.85 |           |           |           |  |
| Mg1                                                      | -1.433611 | 0.000029  | -0.818194 |  |
| Mg2                                                      | -2.669709 | 2.532204  | 0.402518  |  |
| Mg3                                                      | 2.921049  | -2.646232 | -0.131394 |  |
| Mg4                                                      | 0.217043  | 1.585916  | 1.421026  |  |
| Mg5                                                      | -0.025223 | 2.713140  | -1.370253 |  |
| Mg6                                                      | 1.925493  | -0.000044 | -1.421289 |  |
| Mg7                                                      | 0.216798  | -1.585865 | 1.421123  |  |
| Mg8                                                      | -2.670040 | -2.532002 | 0.402404  |  |
| Mg9                                                      | -4.381962 | 0.000241  | 0.135272  |  |
| Mg10                                                     | 2.921336  | 2.646016  | -0.131356 |  |
| Mg11                                                     | -0.025508 | -2.713262 | -1.370087 |  |
| Mg12                                                     | 3.004335  | -0.000140 | 1.460230  |  |
| @mg12-isomer71 bp86/6-31G(d) Etot=-2401.043935 Eb=-10.85 |           |           |           |  |
| Mg1                                                      | 1.307660  | -1.362855 | -2.151294 |  |
| Mg2                                                      | 3.003082  | -3.025737 | -0.162610 |  |
| Mg3                                                      | -2.599888 | -2.190708 | 1.472487  |  |
| Mg4                                                      | -4.320354 | 0.000115  | 0.000015  |  |
| Mg5                                                      | -1.663172 | 0.840792  | 1.322962  |  |
| Mg6                                                      | 3.305982  | 0.000018  | -0.000204 |  |
| Mg7                                                      | 0.459485  | 1.521939  | -0.860864 |  |
| Mg8                                                      | -1.663279 | -0.840812 | -1.322907 |  |
| Mg9                                                      | 3.003051  | 3.025823  | 0.162745  |  |
| Mg10                                                     | 1.307725  | 1.362643  | 2.151348  |  |
| Mg11                                                     | -2.599703 | 2.190769  | -1.472631 |  |
| Mg12                                                     | 0.459410  | -1.521987 | 0.860953  |  |
| @mg12-isomer72 bp86/6-31G(d) Etot=-2401.043918 Eb=-10.85 |           |           |           |  |
| Mg1                                                      | 0.784297  | -1.098141 | 1.901616  |  |
| Mg2                                                      | -2.443728 | 0.591516  | -1.826364 |  |
| Mg3                                                      | -4.145184 | -1.596482 | -0.259905 |  |
| Mg4                                                      | 3.017471  | 1.416993  | -2.199261 |  |
| Mg5                                                      | 0.346628  | 1.948013  | 2.290009  |  |
| Mg6                                                      | -0.896539 | -1.939368 | -0.692594 |  |
| Mg7                                                      | 3.015338  | 1.108457  | 0.843896  |  |
| Mg8                                                      | 1.397659  | -3.944883 | 0.488678  |  |
| Mg9                                                      | 2.199200  | -1.348207 | -1.025471 |  |
| Mg10                                                     | -1.943606 | 0.277477  | 1.205311  |  |
| Mg11                                                     | 0.356019  | 1.180132  | -0.814861 |  |
| Mg12                                                     | -1.687554 | 3.404494  | 0.088945  |  |
| @mg12-isomer73 bp86/6-31G(d) Etot=-2401.043710 Eb=-10.84 |           |           |           |  |
| Mg1                                                      | 0.745495  | 2.016339  | 0.000130  |  |
| Mg2                                                      | -2.319270 | 2.240046  | 0.000140  |  |
| Mg3                                                      | -0.553451 | -0.890465 | -0.000131 |  |
| Mg4                                                      | 2.005184  | -0.388516 | -1.604218 |  |

|      |           |           |           |
|------|-----------|-----------|-----------|
| Mg5  | 4.273804  | 1.091937  | 0.000120  |
| Mg6  | 2.005157  | -0.388831 | 1.604174  |
| Mg7  | -2.507203 | -3.104357 | -0.000020 |
| Mg8  | -3.234559 | -0.455255 | 1.518257  |
| Mg9  | -0.715696 | 1.214045  | -2.536785 |
| Mg10 | -3.234561 | -0.455135 | -1.518401 |
| Mg11 | -0.715672 | 1.213736  | 2.536906  |
| Mg12 | 4.250773  | -2.093544 | -0.000170 |

@mg12-isomer74 bp86/6-31G(d) Etot=-2401.042849 Eb=-10.79

|      |           |           |           |
|------|-----------|-----------|-----------|
| Mg1  | 0.055977  | 0.000040  | 0.750751  |
| Mg2  | -2.548199 | 1.562064  | 1.233969  |
| Mg3  | 2.481257  | -1.559840 | -0.368060 |
| Mg4  | 0.642056  | -0.000400 | -2.492078 |
| Mg5  | -0.462388 | 2.540493  | -1.102346 |
| Mg6  | -2.267204 | -0.000199 | -1.413476 |
| Mg7  | 5.232717  | 0.000127  | 0.570376  |
| Mg8  | -5.318649 | 0.000185  | 0.725562  |
| Mg9  | -2.548285 | -1.561706 | 1.234383  |
| Mg10 | 2.481239  | 1.559690  | -0.368542 |
| Mg11 | 2.713910  | 0.000382  | 2.331068  |
| Mg12 | -0.462431 | -2.540833 | -1.101607 |

@mg12-isomer75 bp86/6-31G(d) Etot=-2401.042624 Eb=-10.78

|      |           |           |           |
|------|-----------|-----------|-----------|
| Mg1  | 0.566566  | -1.047778 | 1.742153  |
| Mg2  | -2.599392 | -1.074700 | 1.737028  |
| Mg3  | 1.453175  | 0.246327  | -1.262255 |
| Mg4  | 3.612126  | -0.495735 | 0.958304  |
| Mg5  | -0.742831 | -1.844162 | -0.887142 |
| Mg6  | -1.171221 | 1.373779  | 0.109177  |
| Mg7  | -4.118946 | 1.607889  | 1.188516  |
| Mg8  | -1.042269 | 0.349972  | -3.010069 |
| Mg9  | -3.569033 | -0.292332 | -1.097929 |
| Mg10 | 2.075079  | -2.964670 | -0.103644 |
| Mg11 | 1.616343  | 2.025977  | 1.314704  |
| Mg12 | 3.920403  | 2.115433  | -0.688844 |

@mg12-isomer76 bp86/6-31G(d) Etot=-2401.042357 Eb=-10.77

|      |           |           |           |
|------|-----------|-----------|-----------|
| Mg1  | -1.069668 | 1.695819  | 1.604316  |
| Mg2  | -3.467978 | -2.551919 | -0.209860 |
| Mg3  | -3.467830 | 2.552021  | -0.209916 |
| Mg4  | 0.864700  | -0.000025 | -0.083802 |
| Mg5  | -2.085773 | 0.000011  | -1.257381 |
| Mg6  | -0.325229 | 2.548101  | -1.295574 |
| Mg7  | 1.111432  | -0.000002 | 2.968926  |
| Mg8  | 3.790788  | -0.000073 | 1.042184  |
| Mg9  | -1.069719 | -1.695783 | 1.604333  |
| Mg10 | 3.022315  | 1.640225  | -1.433775 |
| Mg11 | 3.022292  | -1.640241 | -1.433879 |
| Mg12 | -0.325329 | -2.548132 | -1.295572 |

@mg12-isomer77 bp86/6-31G(d) Etot=-2401.042327 Eb=-10.76

|      |           |           |           |
|------|-----------|-----------|-----------|
| Mg1  | 2.315449  | 2.581875  | -0.058339 |
| Mg2  | 2.380305  | -0.000111 | 1.695514  |
| Mg3  | -2.539855 | 0.000080  | -0.485601 |
| Mg4  | -0.419897 | -1.651040 | 1.430015  |
| Mg5  | 4.045337  | -0.000179 | -0.773754 |
| Mg6  | -0.419577 | 1.651552  | 1.429803  |
| Mg7  | -0.800380 | -2.717775 | -1.361789 |
| Mg8  | -3.429412 | -2.769053 | 0.295830  |
| Mg9  | 0.782112  | -0.000127 | -1.047286 |
| Mg10 | -3.429091 | 2.769234  | 0.295987  |
| Mg11 | -0.800159 | 2.717708  | -1.362104 |
| Mg12 | 2.315167  | -2.582164 | -0.058274 |

@mg12-isomer78 bp86/6-31G(d) Etot=-2401.042296 Eb=-10.76

|      |           |           |           |
|------|-----------|-----------|-----------|
| Mg1  | 0.148357  | 0.527141  | -1.010617 |
| Mg2  | 0.483810  | -2.744779 | -0.776858 |
| Mg3  | -1.347434 | -1.000281 | 1.278631  |
| Mg4  | -2.303479 | -1.376137 | -1.545615 |
| Mg5  | 3.453754  | 0.534273  | -0.111787 |
| Mg6  | 3.540796  | -2.523798 | -0.536730 |
| Mg7  | 1.811852  | -1.406470 | 1.667017  |
| Mg8  | -1.131053 | 3.401663  | -0.085640 |
| Mg9  | -3.205511 | 1.289704  | -0.198386 |
| Mg10 | 1.961007  | 3.053483  | -0.924629 |
| Mg11 | 1.016169  | 1.735880  | 1.648412  |
| Mg12 | -4.428267 | -1.490679 | 0.596202  |

@mg12-isomer79 bp86/6-31G(d) Etot=-2401.042046 Eb=-10.75

|      |           |           |           |
|------|-----------|-----------|-----------|
| Mg1  | -4.076296 | 1.935838  | -0.237188 |
| Mg2  | -1.187256 | 1.800399  | 0.927043  |
| Mg3  | 3.285990  | -0.915506 | -0.261166 |
| Mg4  | -1.633455 | 1.427710  | -2.067438 |
| Mg5  | -3.114373 | -0.951254 | -0.039035 |
| Mg6  | 1.355248  | 2.065114  | -0.979534 |
| Mg7  | -1.180504 | -3.261556 | 0.337320  |
| Mg8  | 1.501965  | -3.038241 | -1.704663 |
| Mg9  | 0.074709  | -0.673847 | -0.516127 |
| Mg10 | 1.663896  | 0.670290  | 1.880641  |
| Mg11 | -0.869617 | -1.054108 | 2.461688  |
| Mg12 | 4.179694  | 1.995160  | 0.198460  |

@mg12-isomer80 bp86/6-31G(d) Etot=-2401.041856 Eb=-10.74

|      |           |           |           |
|------|-----------|-----------|-----------|
| Mg1  | -0.000060 | 0.101368  | -0.443624 |
| Mg2  | -2.672908 | 0.595039  | 1.281644  |
| Mg3  | 1.738489  | 2.730865  | -0.784202 |
| Mg4  | -0.000027 | 2.379661  | 1.742457  |
| Mg5  | -4.415113 | -1.898977 | 0.456496  |
| Mg6  | 2.672886  | 0.595020  | 1.281627  |
| Mg7  | -1.561879 | -2.574122 | -0.018355 |
| Mg8  | 3.049587  | -0.093345 | -1.585001 |
| Mg9  | -3.049614 | -0.093377 | -1.585008 |
| Mg10 | 4.415215  | -1.898939 | 0.456428  |
| Mg11 | -1.738486 | 2.730855  | -0.784243 |
| Mg12 | 1.561910  | -2.574049 | -0.018219 |

@mg12-isomer81 bp86/6-31G(d) Etot=-2401.041717 Eb=-10.73

|      |           |           |           |
|------|-----------|-----------|-----------|
| Mg1  | -1.665512 | 0.262811  | 1.294561  |
| Mg2  | -0.980960 | -2.843389 | 0.125922  |
| Mg3  | 2.274114  | -2.834532 | 0.253415  |
| Mg4  | -2.267836 | -0.523329 | -1.586800 |
| Mg5  | -3.881000 | -1.836254 | 0.496852  |
| Mg6  | -0.785709 | 2.576851  | -0.755002 |
| Mg7  | 2.622213  | 2.277331  | -0.660112 |
| Mg8  | -3.786188 | 1.839763  | -0.283439 |
| Mg9  | 0.752193  | -0.264787 | -0.666150 |
| Mg10 | 3.729031  | -0.657860 | -1.436195 |
| Mg11 | 3.145581  | -0.103750 | 1.407319  |
| Mg12 | 0.844074  | 2.107144  | 1.809629  |

@mg12-isomer82 bp86/6-31G(d) Etot=-2401.041479 Eb=-10.72

|     |           |           |           |
|-----|-----------|-----------|-----------|
| Mg1 | 1.625343  | -1.366467 | 0.226991  |
| Mg2 | -1.044270 | -1.127668 | -1.491196 |
| Mg3 | -0.327333 | 1.105465  | 0.895570  |
| Mg4 | -1.998158 | 2.082119  | -1.453349 |
| Mg5 | -3.365743 | -2.890711 | -0.535548 |
| Mg6 | -2.815361 | 2.759576  | 1.492807  |

|      |           |           |           |
|------|-----------|-----------|-----------|
| Mg7  | -3.418514 | 0.003877  | 0.528579  |
| Mg8  | 2.943168  | 1.646645  | 0.581685  |
| Mg9  | 4.109203  | -0.310358 | -1.382759 |
| Mg10 | -1.176010 | -2.118480 | 1.449433  |
| Mg11 | 1.042634  | 1.005048  | -1.988627 |
| Mg12 | 4.425042  | -0.789047 | 1.676415  |

@mg12-isomer83 bp86/6-31G(d) Etot=-2401.041459 Eb=-10.72

|      |           |           |           |
|------|-----------|-----------|-----------|
| Mg1  | 2.860399  | -2.481258 | 0.227156  |
| Mg2  | -2.014760 | 0.000010  | -0.996949 |
| Mg3  | -2.138474 | 1.583280  | 1.699184  |
| Mg4  | -0.066534 | -2.549839 | -0.470952 |
| Mg5  | 0.765839  | 0.000028  | 1.251131  |
| Mg6  | 1.731888  | -0.000048 | -1.545006 |
| Mg7  | 4.548740  | -0.000021 | 0.061843  |
| Mg8  | 2.860435  | 2.481247  | 0.227139  |
| Mg9  | -2.138557 | -1.583274 | 1.699177  |
| Mg10 | -3.171229 | 2.852825  | -0.840805 |
| Mg11 | -0.066495 | 2.549822  | -0.471044 |
| Mg12 | -3.171252 | -2.852772 | -0.840874 |

@mg12-isomer84 bp86/6-31G(d) Etot=-2401.041288 Eb=-10.71

|      |           |           |           |
|------|-----------|-----------|-----------|
| Mg1  | -1.798604 | 0.364906  | -1.372294 |
| Mg2  | 0.910743  | -1.410245 | -1.067928 |
| Mg3  | -4.052098 | -1.020306 | 0.299813  |
| Mg4  | 3.391757  | 0.651219  | -0.282715 |
| Mg5  | -2.817862 | 1.805349  | 1.102698  |
| Mg6  | -1.215403 | -1.644396 | 1.328403  |
| Mg7  | 2.238442  | 3.445113  | -0.210619 |
| Mg8  | 3.950264  | -2.388729 | -0.348215 |
| Mg9  | -2.040454 | -2.787076 | -1.305464 |
| Mg10 | -0.908406 | 3.217479  | -0.848236 |
| Mg11 | 1.981959  | -1.399019 | 1.750578  |
| Mg12 | 0.359662  | 1.165706  | 0.953977  |

@mg12-isomer85 bp86/6-31G(d) Etot=-2401.041150 Eb=-10.70

|      |           |           |           |
|------|-----------|-----------|-----------|
| Mg1  | 1.284580  | -1.575144 | -0.229216 |
| Mg2  | 3.967704  | -0.000662 | 0.469756  |
| Mg3  | -3.633693 | 1.561485  | 1.317701  |
| Mg4  | -1.564201 | 2.525808  | -0.991193 |
| Mg5  | -3.351959 | 0.000553  | -1.272894 |
| Mg6  | 1.667877  | -0.000756 | 2.425727  |
| Mg7  | -1.060971 | -0.000368 | 1.068620  |
| Mg8  | 1.284891  | 1.574778  | -0.228566 |
| Mg9  | -1.564714 | -2.525261 | -0.992433 |
| Mg10 | -0.459128 | 0.000519  | -2.444713 |
| Mg11 | 7.063693  | 0.000605  | -0.439738 |
| Mg12 | -3.634078 | -1.561556 | 1.316948  |

@mg12-isomer86 bp86/6-31G(d) Etot=-2401.041061 Eb=-10.70

|      |           |           |           |
|------|-----------|-----------|-----------|
| Mg1  | -2.244725 | -0.652022 | 0.615866  |
| Mg2  | 0.895236  | -0.223722 | 1.906706  |
| Mg3  | -0.817223 | -2.829998 | 2.058964  |
| Mg4  | 0.376453  | 1.227145  | -0.870960 |
| Mg5  | 2.999090  | -0.047431 | -0.351798 |
| Mg6  | -1.467510 | -0.661739 | -2.532290 |
| Mg7  | 6.156573  | 0.091646  | -0.321714 |
| Mg8  | -2.539314 | 1.890110  | -0.980786 |
| Mg9  | -0.745101 | 4.516392  | 0.072613  |
| Mg10 | -1.969846 | -3.332693 | -0.774521 |
| Mg11 | -1.315371 | 1.935598  | 1.886047  |
| Mg12 | 0.671738  | -1.913286 | -0.708126 |

@mg12-isomer87 bp86/6-31G(d) Etot=-2401.040738 Eb=-10.68



|      |           |           |           |
|------|-----------|-----------|-----------|
| Mg1  | 0.963896  | 1.623667  | -1.082437 |
| Mg2  | 0.708357  | -1.278486 | -2.022789 |
| Mg3  | -1.617380 | 3.071442  | -1.702914 |
| Mg4  | -1.895302 | 0.175507  | -1.161510 |
| Mg5  | 1.922137  | 1.710598  | 1.972226  |
| Mg6  | 3.109886  | -0.238453 | -0.125556 |
| Mg7  | 6.029403  | -1.449318 | -0.121779 |
| Mg8  | -1.103349 | 2.141044  | 1.218098  |
| Mg9  | -4.662633 | -1.793234 | -0.038165 |
| Mg10 | -2.459151 | -0.550963 | 1.963108  |
| Mg11 | 0.476194  | -0.792072 | 1.267691  |
| Mg12 | -1.472057 | -2.619731 | -0.165973 |

@mg12-isomer88 bp86/6-31G(d) Etot=-2401.039941 Eb=-10.64

|      |           |           |           |
|------|-----------|-----------|-----------|
| Mg1  | -0.038159 | -0.652975 | 1.496309  |
| Mg2  | 0.033300  | -0.054859 | -1.557317 |
| Mg3  | 0.373201  | 2.405606  | 0.423543  |
| Mg4  | -3.144837 | -1.395147 | 1.729775  |
| Mg5  | 2.813590  | 0.283430  | 0.055146  |
| Mg6  | -1.591551 | -2.684046 | -0.476285 |
| Mg7  | 1.502573  | -2.607703 | -0.360230 |
| Mg8  | -1.904479 | 2.394548  | -1.671688 |
| Mg9  | -3.408272 | -0.307443 | -1.131949 |
| Mg10 | 3.402143  | 3.225250  | 0.468035  |
| Mg11 | -2.521584 | 1.598607  | 1.171886  |
| Mg12 | 4.484075  | -2.205268 | -0.147225 |

@mg12-isomer89 bp86/6-31G(d) Etot=-2401.039874 Eb=-10.64

|      |           |           |           |
|------|-----------|-----------|-----------|
| Mg1  | 3.674342  | -0.679369 | 0.703604  |
| Mg2  | 1.667748  | 0.410268  | -1.364579 |
| Mg3  | -1.047995 | -1.347757 | -1.434122 |
| Mg4  | -3.842060 | 2.411932  | 0.885495  |
| Mg5  | 4.325069  | 2.159654  | -0.559483 |
| Mg6  | 0.398170  | -0.774246 | 1.267604  |
| Mg7  | -1.249844 | -3.344727 | 0.814915  |
| Mg8  | -0.990269 | 1.835538  | -0.171932 |
| Mg9  | -3.559099 | 0.771226  | -1.667394 |
| Mg10 | 1.863956  | 2.091114  | 1.175472  |
| Mg11 | -2.959635 | -0.682778 | 0.934985  |
| Mg12 | 1.719617  | -2.850855 | -0.584565 |

@mg12-isomer90 bp86/6-31G(d) Etot=-2401.039735 Eb=-10.63

|      |           |           |           |
|------|-----------|-----------|-----------|
| Mg1  | 2.540289  | -2.318284 | -1.053639 |
| Mg2  | -1.666389 | -1.110934 | 1.416487  |
| Mg3  | -1.867970 | 0.224898  | -1.409564 |
| Mg4  | 0.651377  | -0.556954 | -3.032085 |
| Mg5  | -3.829275 | 1.237525  | 0.712403  |
| Mg6  | -4.325616 | -1.709076 | -0.176729 |
| Mg7  | 3.767190  | -0.335858 | 1.048148  |
| Mg8  | 0.901868  | -0.044778 | 0.030973  |
| Mg9  | 2.407503  | 2.530005  | 0.944657  |
| Mg10 | 1.331376  | -2.302118 | 1.846856  |
| Mg11 | 0.818292  | 2.354269  | -1.684471 |
| Mg12 | -0.728645 | 2.031307  | 1.356965  |

@mg12-isomer91 bp86/6-31G(d) Etot=-2401.039732 Eb=-10.63

|     |           |           |           |
|-----|-----------|-----------|-----------|
| Mg1 | 3.897624  | -1.636391 | -0.307990 |
| Mg2 | 1.081920  | -2.911843 | -1.207822 |
| Mg3 | -3.038998 | 1.381178  | 1.064016  |
| Mg4 | -4.308884 | -1.412756 | 1.261239  |
| Mg5 | 0.271789  | 1.488126  | 1.308479  |
| Mg6 | -1.084525 | 1.751595  | -1.472598 |
| Mg7 | 2.036059  | 2.969088  | -0.741116 |
| Mg8 | -1.281029 | -1.187521 | 0.000992  |

|                                                          |           |           |           |
|----------------------------------------------------------|-----------|-----------|-----------|
| Mg9                                                      | 1.482304  | -1.502678 | 1.526088  |
| Mg10                                                     | 1.432761  | 0.072789  | -1.359490 |
| Mg11                                                     | -3.873419 | -0.047545 | -1.468967 |
| Mg12                                                     | 3.384398  | 1.035959  | 1.397169  |
| @mg12-isomer92 bp86/6-31G(d) Etot=-2401.039566 Eb=-10.62 |           |           |           |
| Mg1                                                      | 0.545836  | -0.935651 | 0.816616  |
| Mg2                                                      | -1.136367 | 2.295555  | 0.520568  |
| Mg3                                                      | -2.448623 | -0.449774 | 1.515622  |
| Mg4                                                      | -1.827384 | -0.252061 | -1.558235 |
| Mg5                                                      | 1.099065  | 0.962382  | -1.722043 |
| Mg6                                                      | -4.571027 | -1.925476 | -0.449391 |
| Mg7                                                      | 2.056058  | 1.755173  | 1.176118  |
| Mg8                                                      | -0.333374 | 1.104008  | 3.127845  |
| Mg9                                                      | 3.314158  | -0.555694 | -0.322842 |
| Mg10                                                     | 6.260195  | -1.702938 | -0.495695 |
| Mg11                                                     | -1.573478 | -2.922287 | -0.173190 |
| Mg12                                                     | -1.385059 | 2.626762  | -2.435372 |
| @mg12-isomer93 bp86/6-31G(d) Etot=-2401.039399 Eb=-10.61 |           |           |           |
| Mg1                                                      | -0.934899 | 0.093419  | 0.000026  |
| Mg2                                                      | -1.538657 | -2.800023 | 0.000059  |
| Mg3                                                      | -1.735492 | -1.251257 | -2.668842 |
| Mg4                                                      | -3.181739 | 1.414477  | -1.554994 |
| Mg5                                                      | -1.735359 | -1.251151 | 2.668933  |
| Mg6                                                      | 1.890528  | 1.392327  | -0.000081 |
| Mg7                                                      | 1.204380  | -1.239987 | -1.669331 |
| Mg8                                                      | 3.861058  | -1.208572 | -0.000068 |
| Mg9                                                      | -0.933639 | 3.042478  | -0.000274 |
| Mg10                                                     | -3.181436 | 1.414733  | 1.555210  |
| Mg11                                                     | 5.080774  | 1.633465  | 0.000023  |
| Mg12                                                     | 1.204480  | -1.239908 | 1.669339  |
| @mg12-isomer94 bp86/6-31G(d) Etot=-2401.039344 Eb=-10.61 |           |           |           |
| Mg1                                                      | -0.927360 | -2.136727 | -0.566098 |
| Mg2                                                      | 0.812397  | 0.427534  | -1.516229 |
| Mg3                                                      | -2.560843 | -0.858274 | 1.764537  |
| Mg4                                                      | 0.600212  | -0.162501 | 1.478642  |
| Mg5                                                      | 4.984961  | -1.723541 | -0.015613 |
| Mg6                                                      | -3.993223 | -2.595629 | -0.421161 |
| Mg7                                                      | -1.180225 | 2.923766  | -1.522498 |
| Mg8                                                      | -1.725528 | 2.174990  | 1.373061  |
| Mg9                                                      | 2.089248  | -2.285787 | -0.239034 |
| Mg10                                                     | -2.919000 | 0.418872  | -0.922475 |
| Mg11                                                     | 3.541861  | 0.937580  | 0.160479  |
| Mg12                                                     | 1.277500  | 2.879718  | 0.426389  |
| @mg12-isomer95 bp86/6-31G(d) Etot=-2401.037824 Eb=-10.53 |           |           |           |
| Mg1                                                      | -5.057875 | -1.056256 | -0.680871 |
| Mg2                                                      | -3.613502 | 1.613642  | -0.961430 |
| Mg3                                                      | 2.227965  | 1.907574  | -1.510006 |
| Mg4                                                      | -2.001147 | -1.299132 | -0.867132 |
| Mg5                                                      | -0.457216 | 1.323837  | 0.087343  |
| Mg6                                                      | 1.062452  | -1.301337 | -1.213531 |
| Mg7                                                      | 2.816495  | -2.653328 | 0.870523  |
| Mg8                                                      | 1.620504  | 3.220229  | 1.246977  |
| Mg9                                                      | 4.065385  | -0.770169 | -1.501708 |
| Mg10                                                     | -3.188826 | 0.029609  | 1.630246  |
| Mg11                                                     | 2.575008  | 0.402699  | 1.148584  |
| Mg12                                                     | -0.049245 | -1.417368 | 1.751008  |
| @mg12-isomer96 bp86/6-31G(d) Etot=-2401.036761 Eb=-10.47 |           |           |           |
| Mg1                                                      | -3.767301 | 1.560948  | -0.848106 |
| Mg2                                                      | 1.366665  | 0.185091  | -1.272149 |

|      |           |           |           |
|------|-----------|-----------|-----------|
| Mg3  | 3.865974  | 0.171978  | 0.708321  |
| Mg4  | -4.064600 | 0.537757  | 2.021072  |
| Mg5  | 3.163821  | 2.646012  | -1.163397 |
| Mg6  | 1.540320  | 2.061705  | 1.388054  |
| Mg7  | 1.315288  | -1.234728 | 1.929614  |
| Mg8  | -3.476296 | -1.427814 | -0.300651 |
| Mg9  | 2.862122  | -2.711521 | -0.258534 |
| Mg10 | -0.242589 | -2.271047 | -0.519529 |
| Mg11 | -1.417587 | -0.086287 | -2.440236 |
| Mg12 | -1.145816 | 0.567906  | 0.755541  |

@mg12-isomer97 bp86/6-31G(d) Etot=-2401.036408 Eb=-10.45

|      |           |           |           |
|------|-----------|-----------|-----------|
| Mg1  | -0.393108 | 1.370505  | -0.430704 |
| Mg2  | 1.488742  | 0.054221  | -2.445062 |
| Mg3  | 1.583512  | -1.070114 | 0.603186  |
| Mg4  | -0.808846 | -1.713549 | -1.379782 |
| Mg5  | -1.334524 | -1.266281 | 1.708289  |
| Mg6  | -2.327521 | 1.937676  | 1.903591  |
| Mg7  | -3.091297 | -3.149860 | 0.075951  |
| Mg8  | 2.921294  | 1.809504  | -0.054828 |
| Mg9  | -3.023722 | 2.822838  | -0.995003 |
| Mg10 | 4.310856  | -0.711065 | -0.912967 |
| Mg11 | 4.172410  | -0.016840 | 2.108599  |
| Mg12 | -3.497796 | -0.067034 | -0.181270 |

@mg12-isomer98 bp86/6-31G(d) Etot=-2401.035842 Eb=-10.42

|      |           |           |           |
|------|-----------|-----------|-----------|
| Mg1  | -1.196702 | 1.072958  | -1.372494 |
| Mg2  | 0.508674  | 3.703997  | -0.578357 |
| Mg3  | 1.988418  | 0.894793  | -0.832667 |
| Mg4  | 2.865441  | -2.413569 | -0.826309 |
| Mg5  | -2.454453 | 3.168208  | 0.496833  |
| Mg6  | 2.390205  | -0.838171 | 1.727120  |
| Mg7  | -0.220233 | -1.606485 | 0.052201  |
| Mg8  | -2.770105 | -1.680709 | -1.740003 |
| Mg9  | -0.050801 | 1.435659  | 1.451668  |
| Mg10 | -2.964376 | -0.156094 | 0.890575  |
| Mg11 | 4.833698  | -0.202666 | -0.023879 |
| Mg12 | -2.929766 | -3.377920 | 0.755311  |

@mg12-isomer99 bp86/6-31G(d) Etot=-2401.035638 Eb=-10.41

|      |           |           |           |
|------|-----------|-----------|-----------|
| Mg1  | -2.248892 | 0.000016  | 1.343520  |
| Mg2  | 0.956113  | -0.000028 | 1.659694  |
| Mg3  | -0.368527 | -0.000023 | -1.104748 |
| Mg4  | 2.517256  | 1.565120  | -0.551789 |
| Mg5  | -0.489106 | 2.591380  | 0.561889  |
| Mg6  | -3.246138 | -1.556360 | -1.172670 |
| Mg7  | 2.517297  | -1.565123 | -0.551857 |
| Mg8  | 5.058574  | 0.000045  | -1.470326 |
| Mg9  | -3.246120 | 1.556365  | -1.172689 |
| Mg10 | -5.406591 | 0.000037  | 0.431729  |
| Mg11 | 4.445251  | 0.000007  | 1.465358  |
| Mg12 | -0.489117 | -2.591437 | 0.561889  |

@mg12-isomer100 bp86/6-31G(d) Etot=-2401.034243 Eb=-10.34

|      |           |           |           |
|------|-----------|-----------|-----------|
| Mg1  | -0.903887 | -0.800066 | 1.087365  |
| Mg2  | -2.033830 | 2.402181  | 1.243041  |
| Mg3  | -3.725444 | -0.225738 | -0.030815 |
| Mg4  | 1.309725  | -0.913007 | -1.162723 |
| Mg5  | -0.211675 | 4.180632  | -0.659698 |
| Mg6  | 2.324214  | -0.967641 | 1.706241  |
| Mg7  | 4.180407  | -2.277550 | -0.431334 |
| Mg8  | -3.048823 | -3.339564 | 0.707730  |
| Mg9  | -1.219512 | 1.281376  | -1.396660 |
| Mg10 | -1.716260 | -1.959133 | -1.650287 |

|                                                           |           |           |           |
|-----------------------------------------------------------|-----------|-----------|-----------|
| Mg11                                                      | 1.028127  | 1.782507  | 0.709129  |
| Mg12                                                      | 4.016958  | 0.836003  | -0.121988 |
| @mg12-isomer101 bp86/6-31G(d) Etot=-2401.033840 Eb=-10.32 |           |           |           |
| Mg1                                                       | -0.018384 | -1.332457 | 0.657154  |
| Mg2                                                       | -1.959561 | 0.044898  | -1.297794 |
| Mg3                                                       | -0.543550 | 1.827406  | 0.730395  |
| Mg4                                                       | 2.527660  | 0.840687  | 1.150053  |
| Mg5                                                       | 3.311603  | -1.721829 | -0.327915 |
| Mg6                                                       | 5.520447  | -0.156520 | 1.157308  |
| Mg7                                                       | 1.193375  | 0.493459  | -1.565206 |
| Mg8                                                       | -2.862163 | -2.757969 | -0.076563 |
| Mg9                                                       | 4.512517  | 0.829370  | -1.481279 |
| Mg10                                                      | -3.658975 | 2.442356  | 0.046445  |
| Mg11                                                      | -5.013153 | -0.337441 | -0.594596 |
| Mg12                                                      | -3.009816 | -0.171960 | 1.601997  |
| @mg12-isomer102 bp86/6-31G(d) Etot=-2401.033455 Eb=-10.30 |           |           |           |
| Mg1                                                       | -0.981148 | 1.792313  | -1.040780 |
| Mg2                                                       | -4.235146 | 1.403493  | -1.011663 |
| Mg3                                                       | -2.229459 | -1.179434 | -0.414489 |
| Mg4                                                       | 2.227307  | 1.701931  | -0.693202 |
| Mg5                                                       | 0.421057  | -0.183412 | 1.008213  |
| Mg6                                                       | 5.306866  | 0.741218  | -0.340307 |
| Mg7                                                       | -5.153364 | -0.759089 | 0.894963  |
| Mg8                                                       | 0.497601  | -0.796231 | -1.970489 |
| Mg9                                                       | 3.421296  | 0.771588  | 2.063630  |
| Mg10                                                      | 0.404350  | -3.153485 | -0.006324 |
| Mg11                                                      | -2.764628 | 1.095545  | 1.611934  |
| Mg12                                                      | 3.085267  | -1.434436 | -0.101486 |
| @mg12-isomer103 bp86/6-31G(d) Etot=-2401.033191 Eb=-10.29 |           |           |           |
| Mg1                                                       | -4.023447 | -1.622836 | -1.112986 |
| Mg2                                                       | 0.010614  | 0.501055  | 1.516612  |
| Mg3                                                       | 3.078607  | 1.435868  | 0.494759  |
| Mg4                                                       | -2.179669 | 1.015771  | -0.631598 |
| Mg5                                                       | -5.343983 | 0.911876  | -0.118645 |
| Mg6                                                       | -0.958962 | -1.979087 | -0.043605 |
| Mg7                                                       | 0.395467  | 3.098681  | -0.120199 |
| Mg8                                                       | -3.432848 | -0.695567 | 1.686401  |
| Mg9                                                       | 2.252571  | -1.762893 | 0.475932  |
| Mg10                                                      | 5.222452  | -0.704410 | 0.999040  |
| Mg11                                                      | 4.107791  | -0.480918 | -1.786394 |
| Mg12                                                      | 0.871407  | 0.282459  | -1.359317 |
| @mg12-isomer104 bp86/6-31G(d) Etot=-2401.032586 Eb=-10.25 |           |           |           |
| Mg1                                                       | -0.805835 | 1.338907  | -1.998848 |
| Mg2                                                       | -5.632530 | 0.415425  | 0.344188  |
| Mg3                                                       | 2.064148  | 0.177269  | -1.338947 |
| Mg4                                                       | 0.673609  | 2.021422  | 0.638333  |
| Mg5                                                       | -3.487640 | -1.524630 | 1.448920  |
| Mg6                                                       | -0.455031 | -1.058041 | 0.059895  |
| Mg7                                                       | 4.925366  | -0.778342 | -0.180354 |
| Mg8                                                       | -3.410641 | -0.663113 | -1.468433 |
| Mg9                                                       | 3.941240  | 2.080809  | 0.611753  |
| Mg10                                                      | 2.197765  | -2.810199 | -0.442591 |
| Mg11                                                      | 2.481402  | -0.515889 | 1.604620  |
| Mg12                                                      | -2.491853 | 1.316382  | 0.721464  |
| @mg12-isomer105 bp86/6-31G(d) Etot=-2401.032463 Eb=-10.25 |           |           |           |
| Mg1                                                       | -0.762872 | 1.049991  | 1.114652  |
| Mg2                                                       | -1.252975 | -2.027965 | 0.454702  |
| Mg3                                                       | -3.832045 | -0.365884 | 1.483176  |
| Mg4                                                       | 1.772307  | -1.238827 | 1.066049  |

|      |           |           |           |
|------|-----------|-----------|-----------|
| Mg5  | -2.639354 | 0.255177  | -1.292453 |
| Mg6  | 2.216328  | 1.876529  | 0.040420  |
| Mg7  | -4.078232 | -2.615532 | -0.634775 |
| Mg8  | 0.560116  | -0.336563 | -1.555070 |
| Mg9  | 4.584533  | -2.817828 | 0.707130  |
| Mg10 | 0.381777  | 3.925515  | 1.256662  |
| Mg11 | -0.640557 | 2.761767  | -1.389832 |
| Mg12 | 3.690972  | -0.466381 | -1.250662 |

@mg12-isomer106 bp86/6-31G(d) Etot=-2401.032305 Eb=-10.24

|      |           |           |           |
|------|-----------|-----------|-----------|
| Mg1  | 1.997723  | 1.668616  | 0.412700  |
| Mg2  | -0.347381 | 0.541193  | -1.453639 |
| Mg3  | -0.971605 | -2.466629 | -0.853113 |
| Mg4  | 4.399561  | -0.000084 | 0.000037  |
| Mg5  | -0.971550 | 2.466559  | 0.853233  |
| Mg6  | 1.997664  | -1.668675 | -0.412637 |
| Mg7  | -3.045587 | -2.214238 | 1.402135  |
| Mg8  | -3.045404 | 2.214378  | -1.402189 |
| Mg9  | -3.612405 | 0.858266  | 1.279967  |
| Mg10 | 7.558707  | 0.000073  | -0.000075 |
| Mg11 | -3.612307 | -0.858182 | -1.280139 |
| Mg12 | -0.347416 | -0.541278 | 1.453719  |

@mg12-isomer107 bp86/6-31G(d) Etot=-2401.031893 Eb=-10.22

|      |           |           |           |
|------|-----------|-----------|-----------|
| Mg1  | 2.739069  | -0.957232 | 1.205138  |
| Mg2  | 4.530605  | -0.230978 | -1.155371 |
| Mg3  | 0.403916  | 1.356555  | 1.753068  |
| Mg4  | 3.548973  | 2.123396  | 1.055722  |
| Mg5  | -0.355371 | -1.296598 | 0.128580  |
| Mg6  | -1.301279 | 1.851650  | -0.870845 |
| Mg7  | -3.406026 | -1.011641 | -1.133712 |
| Mg8  | 2.180451  | -2.369728 | -1.487986 |
| Mg9  | -4.347464 | 1.953932  | -1.262511 |
| Mg10 | 1.608778  | 0.868583  | -1.080012 |
| Mg11 | -2.818767 | 0.419485  | 1.435461  |
| Mg12 | -2.782885 | -2.707424 | 1.412467  |

@mg12-isomer108 bp86/6-31G(d) Etot=-2401.031487 Eb=-10.20

|      |           |           |           |
|------|-----------|-----------|-----------|
| Mg1  | -3.228328 | 0.412250  | -1.085321 |
| Mg2  | -1.980920 | 3.215855  | -1.107076 |
| Mg3  | 2.048222  | -0.523862 | -1.233037 |
| Mg4  | -2.958344 | 2.007962  | 1.598764  |
| Mg5  | 3.049617  | 1.394140  | 1.010614  |
| Mg6  | -2.324564 | -1.261739 | 1.491740  |
| Mg7  | -0.247163 | 1.201477  | 0.373294  |
| Mg8  | 4.261797  | -1.380356 | 0.774795  |
| Mg9  | -3.738691 | -2.596530 | -0.980821 |
| Mg10 | -0.760438 | -1.914181 | -1.029343 |
| Mg11 | 4.955230  | 0.758744  | -1.460335 |
| Mg12 | 0.923581  | -1.313759 | 1.646727  |

@mg12-isomer109 bp86/6-31G(d) Etot=-2401.030787 Eb=-10.16

|      |           |           |           |
|------|-----------|-----------|-----------|
| Mg1  | 0.429183  | -0.000006 | -0.999726 |
| Mg2  | -2.251000 | 0.000023  | 0.929843  |
| Mg3  | -2.313136 | 1.589025  | -1.681716 |
| Mg4  | -0.324042 | 2.618603  | 0.680752  |
| Mg5  | 2.600693  | -1.732018 | 0.590062  |
| Mg6  | -3.438379 | -3.002742 | 0.874533  |
| Mg7  | -2.313220 | -1.588988 | -1.681696 |
| Mg8  | 2.600716  | 1.731979  | 0.590058  |
| Mg9  | 5.071529  | -0.000028 | 0.947874  |
| Mg10 | -3.438300 | 3.002763  | 0.874515  |
| Mg11 | 3.700037  | -0.000015 | -1.805205 |
| Mg12 | -0.324080 | -2.618595 | 0.680705  |

@mg12-isomer110 bp86/6-31G(d) Etot=-2401.030029 Eb=-10.12

|      |           |           |           |
|------|-----------|-----------|-----------|
| Mg1  | 4.446860  | -2.265449 | -0.000008 |
| Mg2  | 1.492793  | -2.854785 | 0.000041  |
| Mg3  | -2.856682 | -0.000285 | 1.448894  |
| Mg4  | -1.492763 | -2.854799 | 0.000042  |
| Mg5  | 1.868769  | 2.594450  | -0.000023 |
| Mg6  | -2.856606 | -0.000329 | -1.448937 |
| Mg7  | -0.000008 | 0.003970  | 0.000046  |
| Mg8  | -1.868801 | 2.594443  | -0.000024 |
| Mg9  | 2.856617  | -0.000306 | -1.448944 |
| Mg10 | -4.446836 | -2.265495 | -0.000017 |
| Mg11 | -0.000020 | 5.048863  | 0.000038  |
| Mg12 | 2.856679  | -0.000278 | 1.448893  |

@mg12-isomer111 bp86/6-31G(d) Etot=-2401.030020 Eb=-10.12

|      |           |           |           |
|------|-----------|-----------|-----------|
| Mg1  | -0.858317 | 1.759421  | 1.157496  |
| Mg2  | -3.876571 | 1.232962  | 0.097282  |
| Mg3  | -4.142883 | -1.855413 | -0.568972 |
| Mg4  | 0.957796  | -1.135060 | 0.902114  |
| Mg5  | -1.190602 | -3.143701 | -0.376847 |
| Mg6  | -2.116770 | -1.142715 | 1.690783  |
| Mg7  | -1.328608 | -0.263848 | -1.250937 |
| Mg8  | 1.429296  | 1.569143  | -1.018547 |
| Mg9  | 3.784775  | -0.275004 | 0.101718  |
| Mg10 | -1.652950 | 2.679535  | -1.635630 |
| Mg11 | 6.668393  | -1.135865 | -0.947144 |
| Mg12 | 2.326441  | 1.710545  | 1.848684  |

@mg12-isomer112 bp86/6-31G(d) Etot=-2401.029045 Eb=-10.07

|      |           |           |           |
|------|-----------|-----------|-----------|
| Mg1  | -0.927510 | 1.402852  | 1.106617  |
| Mg2  | -1.738551 | -1.734620 | 1.927387  |
| Mg3  | 1.367422  | -0.932146 | 1.219118  |
| Mg4  | -3.773561 | 0.093235  | 0.203915  |
| Mg5  | -3.457971 | -2.837642 | -0.380541 |
| Mg6  | -0.892763 | -1.229438 | -0.961597 |
| Mg7  | 2.390030  | -1.950771 | -1.466528 |
| Mg8  | 1.256643  | 1.103776  | -1.199852 |
| Mg9  | -3.470455 | 3.107390  | 0.594974  |
| Mg10 | -1.769578 | 1.924542  | -1.729758 |
| Mg11 | 4.007471  | 0.303928  | -0.170634 |
| Mg12 | 7.008825  | 0.748894  | 0.856898  |

@mg12-isomer113 bp86/6-31G(d) Etot=-2401.028839 Eb=-10.06

|      |           |           |           |
|------|-----------|-----------|-----------|
| Mg1  | -1.755165 | -1.818950 | 0.478512  |
| Mg2  | -4.083415 | 0.523268  | 1.317929  |
| Mg3  | -3.193220 | 0.263763  | -1.481244 |
| Mg4  | 1.204891  | -1.077506 | 1.198687  |
| Mg5  | 4.396660  | -0.213997 | 1.798443  |
| Mg6  | 0.256635  | -0.709143 | -1.661952 |
| Mg7  | 5.704207  | 0.800321  | -0.713311 |
| Mg8  | -4.759268 | -2.108653 | -0.149226 |
| Mg9  | 3.598517  | -1.394037 | -0.965230 |
| Mg10 | -3.090410 | 3.170164  | -0.106885 |
| Mg11 | -0.798364 | 1.217915  | 0.496689  |
| Mg12 | 2.518930  | 1.346853  | -0.212412 |

@mg12-isomer114 bp86/6-31G(d) Etot=-2401.028098 Eb=-10.02

|     |           |           |           |
|-----|-----------|-----------|-----------|
| Mg1 | 0.297643  | 1.376067  | -1.938851 |
| Mg2 | -2.663166 | 0.066725  | -1.426506 |
| Mg3 | 0.315489  | -1.002909 | 0.070017  |
| Mg4 | 1.965578  | 1.797510  | 0.612872  |
| Mg5 | -5.584286 | -1.007198 | -0.431768 |
| Mg6 | -2.947315 | -1.201622 | 1.313654  |

|      |           |           |           |
|------|-----------|-----------|-----------|
| Mg7  | -1.156544 | 1.568350  | 0.805796  |
| Mg8  | 3.190474  | -0.354671 | -1.380729 |
| Mg9  | 3.599110  | -0.950384 | 1.489972  |
| Mg10 | 5.063882  | 1.534190  | 0.282831  |
| Mg11 | 2.343321  | -3.265080 | -0.262904 |
| Mg12 | -4.424186 | 1.439023  | 0.865617  |

@mg12-isomer115 bp86/6-31G(d) Etot=-2401.026990 Eb=-9.96

|      |           |           |           |
|------|-----------|-----------|-----------|
| Mg1  | -1.230817 | -0.000001 | 0.995609  |
| Mg2  | -4.174176 | -1.514631 | 1.077650  |
| Mg3  | 1.363325  | 1.623447  | 0.496121  |
| Mg4  | 0.050128  | -0.000059 | -1.786868 |
| Mg5  | -4.174315 | 1.514382  | 1.078019  |
| Mg6  | 1.363405  | -1.623285 | 0.496278  |
| Mg7  | 4.158404  | -2.779747 | -0.081419 |
| Mg8  | 4.301968  | -0.000032 | 1.371175  |
| Mg9  | 4.158457  | 2.779732  | -0.081388 |
| Mg10 | 3.460196  | -0.000030 | -1.431100 |
| Mg11 | -3.115065 | 0.000201  | -1.463577 |
| Mg12 | -6.161509 | 0.000022  | -0.670500 |

@mg12-isomer116 bp86/6-31G(d) Etot=-2401.025703 Eb=-9.89

|      |           |           |           |
|------|-----------|-----------|-----------|
| Mg1  | -1.722762 | 2.007523  | 0.783918  |
| Mg2  | -4.598275 | -2.442301 | -0.525346 |
| Mg3  | 0.350538  | -0.306525 | 0.283392  |
| Mg4  | 2.697622  | -2.432917 | -0.258122 |
| Mg5  | 2.935532  | 0.585117  | -1.237508 |
| Mg6  | -2.589897 | -1.168314 | 1.454511  |
| Mg7  | 1.492793  | 2.631909  | 0.815243  |
| Mg8  | -4.956089 | 0.522974  | 0.399793  |
| Mg9  | 3.311293  | -0.075030 | 1.657307  |
| Mg10 | -2.440831 | -0.098463 | -1.396979 |
| Mg11 | 5.533254  | -1.291540 | -0.221344 |
| Mg12 | -0.013179 | 2.067567  | -1.754865 |

@mg12-isomer117 bp86/6-31G(d) Etot=-2401.024916 Eb=-9.85

|      |           |           |           |
|------|-----------|-----------|-----------|
| Mg1  | -0.175969 | -0.853205 | -0.311542 |
| Mg2  | 2.723183  | 0.371291  | -0.816507 |
| Mg3  | 1.075854  | 1.809896  | 1.495587  |
| Mg4  | 4.936504  | -1.660700 | 0.178703  |
| Mg5  | -2.112644 | 1.743625  | 0.520417  |
| Mg6  | 2.270462  | -1.281949 | 1.701832  |
| Mg7  | 2.377031  | -2.962445 | -0.904450 |
| Mg8  | -2.279500 | 0.342716  | -2.243779 |
| Mg9  | -0.466161 | 4.403107  | 0.707745  |
| Mg10 | -3.162983 | -1.066333 | 0.309158  |
| Mg11 | -5.496868 | -3.176658 | 0.782685  |
| Mg12 | 0.311091  | 2.330655  | -1.419848 |

@mg12-isomer118 bp86/6-31G(d) Etot=-2401.024734 Eb=-9.84

|      |           |           |           |
|------|-----------|-----------|-----------|
| Mg1  | 1.427907  | 0.279019  | -2.033466 |
| Mg2  | -4.082253 | 2.976134  | -0.481068 |
| Mg3  | 1.814055  | -1.776732 | 0.328255  |
| Mg4  | -0.049572 | -4.065025 | 0.869186  |
| Mg5  | -0.651052 | -2.400768 | -1.617763 |
| Mg6  | -1.623683 | 0.785858  | -1.209177 |
| Mg7  | -1.427230 | -1.326760 | 1.151844  |
| Mg8  | 0.865880  | 1.346104  | 0.792401  |
| Mg9  | 6.552476  | 1.945795  | 0.482105  |
| Mg10 | -2.189820 | 1.735684  | 1.601192  |
| Mg11 | -4.379243 | -0.074307 | 0.216702  |
| Mg12 | 3.742535  | 0.574998  | -0.100211 |

@mg12-isomer119 bp86/6-31G(d) Etot=-2401.024697 Eb=-9.84

|      |           |           |           |
|------|-----------|-----------|-----------|
| Mg1  | 1.696001  | -0.614418 | 1.131750  |
| Mg2  | -0.727337 | 0.899988  | -0.641207 |
| Mg3  | -3.524869 | -0.425259 | 0.370733  |
| Mg4  | 0.746464  | 2.396131  | 1.733900  |
| Mg5  | 1.637198  | -1.263108 | -1.802591 |
| Mg6  | 0.038142  | 4.122488  | -0.705049 |
| Mg7  | -6.338493 | -0.487808 | -1.177650 |
| Mg8  | 2.274590  | 1.747816  | -0.972782 |
| Mg9  | 4.459500  | -0.425836 | -0.519183 |
| Mg10 | 1.846780  | -3.692193 | 0.291794  |
| Mg11 | -0.859446 | -2.182108 | -0.028745 |
| Mg12 | -1.248529 | -0.075693 | 2.319030  |

@mg12-isomer120 bp86/6-31G(d) Etot=-2401.024083 Eb=-9.81

|      |           |           |           |
|------|-----------|-----------|-----------|
| Mg1  | -0.668592 | 0.651566  | 0.898453  |
| Mg2  | -2.857309 | 0.265839  | -1.405662 |
| Mg3  | 2.423193  | 0.778541  | 2.046081  |
| Mg4  | -3.129590 | 2.546428  | 0.719766  |
| Mg5  | 1.932481  | 1.308224  | -0.904966 |
| Mg6  | 1.431644  | -1.677633 | 0.334362  |
| Mg7  | 4.223519  | -0.597093 | 0.037387  |
| Mg8  | 7.298661  | -0.616644 | -0.708855 |
| Mg9  | -1.538805 | -2.374605 | 0.022064  |
| Mg10 | -3.826059 | -0.498704 | 1.377536  |
| Mg11 | -4.440659 | -2.447994 | -0.951832 |
| Mg12 | -0.848485 | 2.662076  | -1.464334 |

@mg12-isomer121 bp86/6-31G(d) Etot=-2401.023807 Eb=-9.80

|      |           |           |           |
|------|-----------|-----------|-----------|
| Mg1  | -0.472942 | 0.763857  | 1.674266  |
| Mg2  | -2.221587 | -1.285641 | -0.345282 |
| Mg3  | -3.939148 | 0.603768  | 1.452052  |
| Mg4  | 1.401259  | 2.642030  | -0.044885 |
| Mg5  | -5.195029 | -2.114710 | 0.377310  |
| Mg6  | 0.812317  | -0.386093 | -0.885730 |
| Mg7  | 3.876431  | 0.699997  | -1.302544 |
| Mg8  | -4.720001 | 0.379964  | -1.425728 |
| Mg9  | 2.832814  | 0.047133  | 1.444304  |
| Mg10 | 3.452744  | -2.287063 | -0.619380 |
| Mg11 | 5.820976  | -0.817319 | 0.578339  |
| Mg12 | -1.647834 | 1.754077  | -0.902722 |

@mg12-isomer122 bp86/6-31G(d) Etot=-2401.023352 Eb=-9.77

|      |           |           |           |
|------|-----------|-----------|-----------|
| Mg1  | -1.072295 | -1.594600 | -1.573376 |
| Mg2  | -3.511251 | -2.623863 | 0.001769  |
| Mg3  | -3.849412 | 0.001545  | 1.585663  |
| Mg4  | -3.849198 | -0.000728 | -1.585948 |
| Mg5  | 1.056694  | -0.000712 | 0.000228  |
| Mg6  | 4.136835  | -0.000484 | 0.000250  |
| Mg7  | -1.071812 | 1.594188  | 1.573530  |
| Mg8  | -3.510075 | 2.624533  | -0.002011 |
| Mg9  | 6.906877  | 1.656841  | 0.001861  |
| Mg10 | 6.907750  | -1.656335 | -0.002125 |
| Mg11 | -1.071587 | 1.591937  | -1.575702 |
| Mg12 | -1.072526 | -1.592321 | 1.575861  |

@mg12-isomer123 bp86/6-31G(d) Etot=-2401.022732 Eb=-9.74

|     |           |           |           |
|-----|-----------|-----------|-----------|
| Mg1 | 0.955889  | 0.719575  | 0.384266  |
| Mg2 | -1.459319 | 2.482991  | -0.677116 |
| Mg3 | -0.377051 | -2.383542 | 0.795206  |
| Mg4 | 2.091392  | -1.807636 | -1.206036 |
| Mg5 | 2.650544  | -1.718215 | 1.762468  |
| Mg6 | -1.168721 | -0.802888 | -1.647356 |
| Mg7 | -4.053068 | 0.739913  | -1.095064 |
| Mg8 | -3.431237 | -2.373113 | -0.374216 |



|      |           |          |           |
|------|-----------|----------|-----------|
| Mg9  | 4.059834  | 0.236724 | -0.033841 |
| Mg10 | -2.130415 | 0.080877 | 1.235362  |
| Mg11 | -3.751398 | 2.741139 | 1.326263  |
| Mg12 | 6.613550  | 2.084177 | -0.469936 |

@mg12-isomer124 bp86/6-31G(d) Etot=-2401.022547 Eb=-9.73

|      |           |           |           |
|------|-----------|-----------|-----------|
| Mg1  | -0.089810 | -1.156342 | 0.845349  |
| Mg2  | 2.999025  | -2.992261 | 0.463135  |
| Mg3  | 2.929515  | 0.012955  | 1.415585  |
| Mg4  | -2.277189 | 1.418199  | 0.721756  |
| Mg5  | 2.013327  | -0.677360 | -1.417444 |
| Mg6  | -3.050919 | -1.464188 | 0.055221  |
| Mg7  | -1.145069 | 0.013153  | -1.804062 |
| Mg8  | 0.916162  | 1.999654  | 0.003305  |
| Mg9  | -5.273707 | -3.746897 | 0.211368  |
| Mg10 | -0.838597 | 4.024699  | 1.489299  |
| Mg11 | -1.345155 | 3.457937  | -1.496769 |
| Mg12 | 5.162417  | -0.889550 | -0.486741 |

@mg12-isomer125 bp86/6-31G(d) Etot=-2401.019165 Eb=-9.55

|      |           |           |           |
|------|-----------|-----------|-----------|
| Mg1  | -1.573333 | -0.375661 | 1.105998  |
| Mg2  | 0.619391  | 0.523158  | -1.158874 |
| Mg3  | 1.305065  | -1.924076 | 0.669623  |
| Mg4  | -3.993135 | -2.031377 | -0.343935 |
| Mg5  | -1.037924 | -2.299060 | -1.432699 |
| Mg6  | -1.358526 | 2.504022  | 0.349751  |
| Mg7  | -2.464179 | 0.483769  | -1.792589 |
| Mg8  | 3.592858  | 0.254080  | 0.127381  |
| Mg9  | 1.213773  | 1.036806  | 1.821835  |
| Mg10 | -1.452122 | 5.665613  | 0.124734  |
| Mg11 | -1.419723 | -3.374054 | 1.399584  |
| Mg12 | 6.567853  | -0.463219 | -0.870808 |

@mg12-isomer126 bp86/6-31G(d) Etot=-2401.018575 Eb=-9.52

|      |           |           |           |
|------|-----------|-----------|-----------|
| Mg1  | -0.513045 | 0.163770  | -1.506015 |
| Mg2  | -2.742542 | 0.019113  | 0.667609  |
| Mg3  | 2.166599  | -1.864413 | -0.093270 |
| Mg4  | 2.630469  | 1.152272  | -0.950259 |
| Mg5  | -3.103675 | -2.103330 | -1.743210 |
| Mg6  | -0.791954 | -2.646377 | 0.245371  |
| Mg7  | 5.055162  | -0.961975 | -0.826278 |
| Mg8  | 3.776585  | 0.171360  | 1.716158  |
| Mg9  | 0.449571  | 0.502708  | 1.321435  |
| Mg10 | -3.722410 | -2.916530 | 1.179704  |
| Mg11 | -1.365561 | 2.653792  | 0.034416  |
| Mg12 | -1.839200 | 5.829611  | -0.045660 |

@mg12-isomer127 bp86/6-31G(d) Etot=-2401.017475 Eb=-9.46

|      |           |           |           |
|------|-----------|-----------|-----------|
| Mg1  | -1.092393 | -0.773889 | 1.181802  |
| Mg2  | -0.324590 | 1.006342  | -1.454051 |
| Mg3  | -3.076256 | -0.768807 | -1.402561 |
| Mg4  | 1.768951  | -0.537739 | 0.332986  |
| Mg5  | -2.793061 | 1.932128  | 0.215997  |
| Mg6  | -4.105532 | -0.667115 | 1.468664  |
| Mg7  | -0.679173 | 4.216653  | -0.758186 |
| Mg8  | 0.149378  | 2.151645  | 1.374392  |
| Mg9  | 4.855982  | -0.499546 | 0.204731  |
| Mg10 | -0.231832 | -2.125996 | -1.534435 |
| Mg11 | -2.645970 | -3.452373 | 0.235833  |
| Mg12 | 8.174495  | -0.481302 | 0.134828  |

@mg12-isomer128 bp86/6-31G(d) Etot=-2401.017474 Eb=-9.46

|     |          |           |           |
|-----|----------|-----------|-----------|
| Mg1 | 0.020771 | -1.805518 | -0.220709 |
| Mg2 | 1.747998 | 0.680616  | -0.701826 |

|      |           |           |           |
|------|-----------|-----------|-----------|
| Mg3  | -3.127345 | -1.169807 | 0.354110  |
| Mg4  | -0.600232 | 0.521740  | 1.631471  |
| Mg5  | 4.789354  | 0.206187  | -0.028650 |
| Mg6  | 2.636735  | -1.066769 | 1.690346  |
| Mg7  | -1.464013 | 0.791870  | -1.275980 |
| Mg8  | 3.249457  | -2.133351 | -1.086711 |
| Mg9  | 7.531577  | 1.824506  | -0.063619 |
| Mg10 | -4.790101 | 0.544295  | -1.830032 |
| Mg11 | -6.126033 | -0.220729 | 0.753345  |
| Mg12 | -3.868167 | 1.826961  | 0.778255  |

@mg12-isomer129 bp86/6-31G(d) Etot=-2401.015641 Eb=-9.37

|      |           |           |           |
|------|-----------|-----------|-----------|
| Mg1  | -4.031275 | -0.140028 | -1.443420 |
| Mg2  | -4.032155 | -0.140561 | 1.442947  |
| Mg3  | -1.493877 | 1.318509  | 0.000897  |
| Mg4  | -4.275548 | 2.667195  | 0.000159  |
| Mg5  | 1.150795  | 3.076510  | -0.000711 |
| Mg6  | 1.112677  | -0.429347 | 0.001335  |
| Mg7  | 3.708807  | 1.454217  | -0.000853 |
| Mg8  | -1.569757 | -1.870130 | 0.000336  |
| Mg9  | -4.436906 | -2.938300 | -0.000915 |
| Mg10 | 6.305551  | -0.337210 | -0.001020 |
| Mg11 | 3.781539  | -1.329638 | 1.487641  |
| Mg12 | 3.780149  | -1.331218 | -1.486395 |

@mg12-isomer130 bp86/6-31G(d) Etot=-2401.013404 Eb=-9.25

|      |           |           |           |
|------|-----------|-----------|-----------|
| Mg1  | -3.371850 | -2.603758 | 0.002943  |
| Mg2  | -0.307282 | -1.575158 | 0.001764  |
| Mg3  | -5.393082 | 0.000083  | 0.000003  |
| Mg4  | -2.574673 | 0.001758  | 1.557915  |
| Mg5  | -0.307247 | 1.575103  | -0.001778 |
| Mg6  | 2.420760  | -0.000070 | -0.000016 |
| Mg7  | 0.469958  | -0.003007 | -2.609565 |
| Mg8  | -3.371750 | 2.603814  | -0.002931 |
| Mg9  | 0.469982  | 0.002902  | 2.609543  |
| Mg10 | 5.592648  | 0.000031  | -0.000010 |
| Mg11 | 8.947215  | 0.000044  | 0.000018  |
| Mg12 | -2.574680 | -0.001742 | -1.557887 |

@mg12-isomer131 bp86/6-31G(d) Etot=-2401.013267 Eb=-9.24

|      |           |           |           |
|------|-----------|-----------|-----------|
| Mg1  | -2.257823 | -1.225778 | 1.596543  |
| Mg2  | 0.309639  | -0.226756 | 0.143550  |
| Mg3  | -3.798483 | 2.933428  | -1.287784 |
| Mg4  | -2.569653 | 0.105699  | -1.221455 |
| Mg5  | 3.397585  | 0.011354  | 0.054855  |
| Mg6  | 6.031261  | -1.628573 | 0.064016  |
| Mg7  | 5.931291  | 1.138034  | 1.433545  |
| Mg8  | -4.624555 | -2.252526 | -0.190136 |
| Mg9  | -1.500412 | -2.765959 | -0.886337 |
| Mg10 | -1.913950 | 2.097420  | 1.085261  |
| Mg11 | 5.817688  | 0.934605  | -1.644424 |
| Mg12 | -4.822588 | 0.879055  | 0.852366  |

@mg12-isomer132 bp86/6-31G(d) Etot=-2401.011576 Eb=-9.16

|      |           |           |           |
|------|-----------|-----------|-----------|
| Mg1  | 0.273361  | -1.153185 | 0.682583  |
| Mg2  | -2.773236 | -1.725117 | 1.773967  |
| Mg3  | 0.166213  | 1.601401  | -0.778483 |
| Mg4  | -1.637249 | 1.436074  | 1.792975  |
| Mg5  | 0.504011  | -1.043215 | -2.390569 |
| Mg6  | 2.895842  | 0.002975  | -0.831199 |
| Mg7  | -4.597794 | 0.651320  | 0.908900  |
| Mg8  | -2.279628 | -0.362060 | -1.015772 |
| Mg9  | 5.864619  | -0.064627 | 0.177228  |
| Mg10 | 9.126967  | -0.157810 | 0.864940  |

|                                                          |           |           |           |
|----------------------------------------------------------|-----------|-----------|-----------|
| Mg11                                                     | -2.721554 | 2.879925  | -0.653285 |
| Mg12                                                     | -4.821550 | -2.065680 | -0.531285 |
| @mg12-isomer133 bp86/6-31G(d) Etot=-2401.011443 Eb=-9.15 |           |           |           |
| Mg1                                                      | 0.000003  | -2.196060 | -0.971930 |
| Mg2                                                      | -2.444671 | -4.082617 | -0.881133 |
| Mg3                                                      | 2.309412  | 0.031677  | -1.268137 |
| Mg4                                                      | 1.673168  | -1.195283 | 1.579901  |
| Mg5                                                      | 2.644890  | 2.016283  | 1.011277  |
| Mg6                                                      | -3.114622 | -1.107158 | -0.735795 |
| Mg7                                                      | -1.410407 | -2.393160 | 1.611603  |
| Mg8                                                      | -3.243890 | 1.884090  | -0.060784 |
| Mg9                                                      | 4.669792  | 2.183803  | -1.487361 |
| Mg10                                                     | -0.508832 | 0.669608  | 0.550851  |
| Mg11                                                     | -5.365441 | 4.334642  | 0.064456  |
| Mg12                                                     | 4.790597  | -0.145825 | 0.587051  |
| @mg12-isomer134 bp86/6-31G(d) Etot=-2401.009569 Eb=-9.05 |           |           |           |
| Mg1                                                      | 1.710591  | -0.624239 | -0.730029 |
| Mg2                                                      | 1.470299  | 1.168584  | 1.723815  |
| Mg3                                                      | 4.867872  | -1.571816 | -1.546438 |
| Mg4                                                      | -1.099066 | 0.809958  | -0.006399 |
| Mg5                                                      | -4.106415 | 0.178893  | 0.007922  |
| Mg6                                                      | 4.239596  | 1.163808  | -0.194293 |
| Mg7                                                      | -6.450987 | -0.849486 | 1.757081  |
| Mg8                                                      | -7.008961 | 1.032202  | -0.624989 |
| Mg9                                                      | 4.235024  | -1.416479 | 1.423943  |
| Mg10                                                     | 1.266392  | 2.448506  | -1.017379 |
| Mg11                                                     | -6.134138 | -1.882764 | -1.130872 |
| Mg12                                                     | 7.009793  | -0.457169 | 0.337638  |
| @mg12-isomer135 bp86/6-31G(d) Etot=-2401.008980 Eb=-9.02 |           |           |           |
| Mg1                                                      | 1.236142  | 1.248303  | -0.004138 |
| Mg2                                                      | 0.065902  | -1.611027 | -0.004617 |
| Mg3                                                      | -2.846335 | -1.763434 | 1.483862  |
| Mg4                                                      | -5.035214 | -0.210060 | 0.001557  |
| Mg5                                                      | 2.881007  | -1.097354 | 1.433022  |
| Mg6                                                      | -7.553540 | 1.772228  | 0.004806  |
| Mg7                                                      | 2.841663  | 3.893385  | -0.002062 |
| Mg8                                                      | -1.952315 | 0.777660  | -0.001952 |
| Mg9                                                      | 2.886170  | -1.098778 | -1.432406 |
| Mg10                                                     | 5.736680  | -1.467365 | 0.006019  |
| Mg11                                                     | -2.849618 | -1.762781 | -1.486400 |
| Mg12                                                     | 4.589458  | 1.319221  | 0.002310  |
| @mg12-isomer136 bp86/6-31G(d) Etot=-2401.007006 Eb=-8.92 |           |           |           |
| Mg1                                                      | 0.079201  | -0.060457 | -0.903660 |
| Mg2                                                      | -1.056009 | -2.207758 | 0.938763  |
| Mg3                                                      | -0.322248 | 0.642263  | 2.069188  |
| Mg4                                                      | 1.412055  | -2.911958 | -1.403663 |
| Mg5                                                      | -2.800201 | 0.272983  | 0.222168  |
| Mg6                                                      | 2.405092  | 1.759473  | 0.738666  |
| Mg7                                                      | -5.874964 | 0.550699  | -0.181943 |
| Mg8                                                      | 3.244233  | -0.295890 | -1.542848 |
| Mg9                                                      | -9.160700 | 0.837708  | -0.620382 |
| Mg10                                                     | 2.183991  | -1.438109 | 1.123777  |
| Mg11                                                     | 4.692402  | 2.540533  | -1.274701 |
| Mg12                                                     | 5.197149  | 0.310512  | 0.834635  |
| @mg12-isomer137 bp86/6-31G(d) Etot=-2401.005935 Eb=-8.86 |           |           |           |
| Mg1                                                      | -1.685808 | 0.503543  | -0.000053 |
| Mg2                                                      | -2.610656 | -2.046868 | -1.477361 |
| Mg3                                                      | -0.862722 | 3.461527  | 0.000017  |
| Mg4                                                      | -4.729841 | -0.329808 | -0.000047 |

|      |           |           |           |
|------|-----------|-----------|-----------|
| Mg5  | 1.430306  | 1.020983  | -0.000146 |
| Mg6  | 0.240637  | -2.023471 | 0.000047  |
| Mg7  | -2.610703 | -2.046810 | 1.477348  |
| Mg8  | 4.329510  | 1.108616  | 1.483393  |
| Mg9  | 3.278344  | -1.466324 | 0.000088  |
| Mg10 | -7.463302 | 1.352601  | 0.000080  |
| Mg11 | 6.354621  | -0.642384 | 0.000143  |
| Mg12 | 4.329615  | 1.108395  | -1.483510 |

@mg12-isomer138 bp86/6-31G(d) Etot=-2401.005746 Eb=-8.85

|      |           |           |           |
|------|-----------|-----------|-----------|
| Mg1  | 3.113975  | -0.149916 | -0.003869 |
| Mg2  | 2.196686  | -1.787112 | 2.622922  |
| Mg3  | 2.028817  | 2.686928  | 0.000746  |
| Mg4  | 0.369331  | -2.299922 | 0.002045  |
| Mg5  | 0.297619  | 0.569804  | 1.526486  |
| Mg6  | 3.247083  | -3.127340 | -0.005014 |
| Mg7  | 0.291305  | 0.570774  | -1.521474 |
| Mg8  | 2.181520  | -1.788485 | -2.627476 |
| Mg9  | 2.229208  | 5.888023  | -0.003445 |
| Mg10 | -2.160044 | -0.618349 | 0.005932  |
| Mg11 | -5.242498 | -0.143353 | 0.009826  |
| Mg12 | -8.553001 | 0.198950  | -0.006679 |

@mg12-isomer139 bp86/6-31G(d) Etot=-2401.002760 Eb=-8.70

|      |           |           |           |
|------|-----------|-----------|-----------|
| Mg1  | -3.263706 | 0.000095  | -1.143136 |
| Mg2  | -0.429088 | 0.000246  | -2.753360 |
| Mg3  | -3.867288 | 2.650484  | 0.475123  |
| Mg4  | -3.065259 | -0.000173 | 1.873242  |
| Mg5  | 1.926298  | 0.000078  | -0.885274 |
| Mg6  | 4.860403  | 0.000017  | 0.094716  |
| Mg7  | -5.865085 | -0.000064 | 0.746433  |
| Mg8  | -0.785973 | 1.571612  | -0.099383 |
| Mg9  | -0.785953 | -1.571564 | -0.099649 |
| Mg10 | 7.571391  | -1.641756 | 0.658436  |
| Mg11 | 7.571541  | 1.641596  | 0.658224  |
| Mg12 | -3.867281 | -2.650571 | 0.474629  |

@mg12-isomer140 bp86/6-31G(d) Etot=-2401.002701 Eb=-8.69

|      |           |           |           |
|------|-----------|-----------|-----------|
| Mg1  | -1.915201 | 1.060399  | -0.000060 |
| Mg2  | 0.986643  | 1.197648  | 1.447091  |
| Mg3  | 3.005819  | -0.820320 | -0.000006 |
| Mg4  | 6.123963  | -0.737460 | 0.000004  |
| Mg5  | -0.259443 | 3.689794  | 0.000034  |
| Mg6  | 9.454349  | -0.723498 | 0.000027  |
| Mg7  | -2.935036 | -1.891507 | -0.000004 |
| Mg8  | -6.013578 | -2.050175 | 0.000058  |
| Mg9  | -4.760374 | 0.345996  | 1.491454  |
| Mg10 | 0.986715  | 1.197727  | -1.447085 |
| Mg11 | -4.760436 | 0.345947  | -1.491450 |
| Mg12 | 0.086579  | -1.614551 | -0.000063 |

@mg12-isomer141 bp86/6-31G(d) Etot=-2400.998150 Eb=-8.45

|      |           |           |           |
|------|-----------|-----------|-----------|
| Mg1  | -1.276368 | 0.178350  | -0.000282 |
| Mg2  | -4.491497 | 0.191604  | 0.000141  |
| Mg3  | -3.103363 | 2.908358  | 0.000210  |
| Mg4  | 4.660041  | -0.193412 | 0.000004  |
| Mg5  | 1.777754  | 0.954308  | -0.000359 |
| Mg6  | -2.987460 | -2.119722 | -1.504867 |
| Mg7  | -0.248059 | 2.745468  | 1.477310  |
| Mg8  | -5.560999 | -2.836231 | 0.000097  |
| Mg9  | 7.232599  | -1.227499 | 1.641108  |
| Mg10 | -2.987141 | -2.119819 | 1.504639  |
| Mg11 | -0.248196 | 2.746044  | -1.477024 |
| Mg12 | 7.232687  | -1.227449 | -1.640978 |

@mg12-isomer142 bp86/6-31G(d) Etot=-2400.996120 Eb=-8.35

|      |           |           |           |
|------|-----------|-----------|-----------|
| Mg1  | -1.384015 | 1.396004  | -0.000044 |
| Mg2  | -4.173128 | 0.296985  | 1.448488  |
| Mg3  | 1.520310  | 1.930518  | -1.473827 |
| Mg4  | 3.798419  | 0.501552  | 0.000047  |
| Mg5  | 0.894529  | -0.731706 | 0.000025  |
| Mg6  | 6.748260  | -0.519129 | 0.000004  |
| Mg7  | -5.433506 | -2.291196 | 0.000029  |
| Mg8  | 1.520262  | 1.930547  | 1.473836  |
| Mg9  | -7.144846 | 0.213125  | -0.000026 |
| Mg10 | 9.970274  | -1.371521 | -0.000035 |
| Mg11 | -2.143457 | -1.652091 | 0.000040  |
| Mg12 | -4.173103 | 0.296913  | -1.448538 |

@mg12-isomer143 bp86/6-31G(d) Etot=-2400.995755 Eb=-8.33

|      |            |           |           |
|------|------------|-----------|-----------|
| Mg1  | 3.677264   | 1.001552  | -0.009263 |
| Mg2  | 1.028550   | 2.890724  | -0.026353 |
| Mg3  | 1.109362   | 0.233630  | 1.568347  |
| Mg4  | -1.498922  | 1.279245  | -0.011314 |
| Mg5  | 3.170579   | -1.981499 | 0.018093  |
| Mg6  | 1.109082   | 0.204832  | -1.572064 |
| Mg7  | -4.452469  | 0.358581  | -0.003039 |
| Mg8  | -7.634602  | -0.180727 | 0.001694  |
| Mg9  | 6.070081   | -1.167955 | 0.010367  |
| Mg10 | -10.808304 | -1.287939 | 0.011464  |
| Mg11 | 4.114453   | -0.699416 | -2.635126 |
| Mg12 | 4.114925   | -0.651030 | 2.647194  |

@mg12-isomer144 bp86/6-31G(d) Etot=-2400.995546 Eb=-8.32

|      |           |           |           |
|------|-----------|-----------|-----------|
| Mg1  | 5.819443  | -0.000178 | -1.448692 |
| Mg2  | 6.218400  | -2.811836 | -0.000379 |
| Mg3  | 0.805485  | 0.000381  | 0.000686  |
| Mg4  | 3.351506  | -1.685578 | 0.000117  |
| Mg5  | -7.954249 | 1.642832  | 0.685043  |
| Mg6  | 5.819927  | -0.000185 | 1.448096  |
| Mg7  | -5.425157 | 0.001004  | 0.002585  |
| Mg8  | -7.953125 | -1.416666 | 1.078345  |
| Mg9  | -7.949580 | -0.227576 | -1.767294 |
| Mg10 | -2.303546 | 0.000653  | 0.001730  |
| Mg11 | 6.219018  | 2.811390  | -0.000366 |
| Mg12 | 3.351880  | 1.685758  | 0.000128  |

@mg13-isomer01 bp86/6-31G(d) Etot=-2601.163726 Eb=-12.43

|      |           |           |           |
|------|-----------|-----------|-----------|
| Mg1  | 0.822754  | -0.730193 | 2.142340  |
| Mg2  | -2.187363 | -0.498528 | 1.836159  |
| Mg3  | 2.260014  | 2.030259  | 2.046696  |
| Mg4  | -4.114743 | -1.598129 | -0.331182 |
| Mg5  | 0.278759  | 0.963460  | -2.554312 |
| Mg6  | -0.383159 | -1.352747 | -0.668165 |
| Mg7  | 2.472581  | -1.055280 | -2.022196 |
| Mg8  | -0.201978 | 1.592035  | 0.374272  |
| Mg9  | -2.711215 | 0.763131  | -1.657134 |
| Mg10 | 1.984515  | -2.938817 | 0.294110  |
| Mg11 | 2.658410  | 1.975702  | -0.961099 |
| Mg12 | -4.455111 | 1.232377  | 0.758382  |
| Mg13 | 3.576536  | -0.383269 | 0.742131  |

@mg13-isomer02 bp86/6-31G(d) Etot=-2601.160974 Eb=-12.30

|     |           |           |           |
|-----|-----------|-----------|-----------|
| Mg1 | 0.118575  | 1.006003  | -1.687737 |
| Mg2 | 2.241738  | -1.198902 | -1.993499 |
| Mg3 | -0.725797 | -1.923730 | -1.369674 |
| Mg4 | 3.700626  | -0.304338 | 0.652562  |
| Mg5 | 1.433242  | 1.871205  | 0.942796  |

|      |           |           |           |
|------|-----------|-----------|-----------|
| Mg6  | 3.148345  | 1.652177  | -1.619821 |
| Mg7  | -0.780827 | -0.308062 | 1.302570  |
| Mg8  | 1.368036  | -2.357658 | 0.753665  |
| Mg9  | -3.227228 | 0.472495  | -1.697112 |
| Mg10 | 1.782448  | -0.366018 | 2.988636  |
| Mg11 | -3.539727 | -1.921273 | 0.128973  |
| Mg12 | -4.048262 | 0.874673  | 1.164522  |
| Mg13 | -1.471170 | 2.503427  | 0.434119  |

@mg13-isomer03 bp86/6-31G(d) Etot=-2601.158862 Eb=-12.20

|      |           |           |           |
|------|-----------|-----------|-----------|
| Mg1  | -0.429394 | -0.305499 | -1.740425 |
| Mg2  | 0.589931  | 2.398866  | -1.600278 |
| Mg3  | -0.298599 | 1.735742  | 1.226030  |
| Mg4  | -2.608651 | 1.912339  | -1.002484 |
| Mg5  | -1.496238 | -2.977384 | -1.004205 |
| Mg6  | -3.462007 | 0.923090  | 1.784480  |
| Mg7  | 2.785348  | 0.007788  | -2.055076 |
| Mg8  | 2.837028  | 1.753139  | 0.482247  |
| Mg9  | 1.305201  | -2.118085 | -0.054290 |
| Mg10 | 4.037772  | -0.931842 | 0.592690  |
| Mg11 | -3.725137 | -0.924714 | -0.616125 |
| Mg12 | 1.598442  | -0.322820 | 2.518939  |
| Mg13 | -1.133697 | -1.150620 | 1.468496  |

@mg13-isomer04 bp86/6-31G(d) Etot=-2601.158034 Eb=-12.16

|      |           |           |           |
|------|-----------|-----------|-----------|
| Mg1  | -0.815659 | -1.533550 | 1.334098  |
| Mg2  | 3.251205  | 0.000001  | -1.990662 |
| Mg3  | -0.526460 | -2.880779 | -1.413723 |
| Mg4  | 1.996094  | -1.952595 | 0.065800  |
| Mg5  | 4.123519  | -0.000108 | 0.924828  |
| Mg6  | 1.495572  | -0.000139 | 2.607356  |
| Mg7  | 1.996232  | 1.952535  | 0.065936  |
| Mg8  | -0.050611 | 0.000107  | -1.613474 |
| Mg9  | -3.270495 | -1.519074 | -0.855407 |
| Mg10 | -3.587139 | -0.000016 | 1.809926  |
| Mg11 | -0.526365 | 2.881005  | -1.413500 |
| Mg12 | -0.815550 | 1.533490  | 1.334139  |
| Mg13 | -3.270342 | 1.519121  | -0.855317 |

@mg13-isomer05 bp86/6-31G(d) Etot=-2601.157919 Eb=-12.15

|      |           |           |           |
|------|-----------|-----------|-----------|
| Mg1  | 3.511050  | 1.525904  | -1.305422 |
| Mg2  | 4.202517  | -0.489216 | 0.789489  |
| Mg3  | 1.764123  | -1.933283 | 1.755064  |
| Mg4  | 1.792019  | 1.284933  | 1.329820  |
| Mg5  | -3.793133 | 0.638535  | 1.646024  |
| Mg6  | -1.067123 | 2.445986  | 1.249296  |
| Mg7  | 1.848837  | -0.991931 | -1.287547 |
| Mg8  | -0.862309 | -0.464620 | 1.620912  |
| Mg9  | 0.312361  | 1.747196  | -1.412767 |
| Mg10 | -2.813262 | 1.298869  | -1.140489 |
| Mg11 | -0.466218 | -2.724498 | -0.251241 |
| Mg12 | -1.040074 | -0.771761 | -2.506121 |
| Mg13 | -3.388788 | -1.566114 | -0.487018 |

@mg13-isomer06 bp86/6-31G(d) Etot=-2601.157248 Eb=-12.12

|     |           |           |           |
|-----|-----------|-----------|-----------|
| Mg1 | -0.798726 | 1.519402  | -2.129252 |
| Mg2 | -2.122688 | 2.005420  | 0.505901  |
| Mg3 | -2.122529 | -2.004458 | 0.509555  |
| Mg4 | 1.752668  | -0.001483 | -1.642927 |
| Mg5 | 3.973063  | -1.507814 | -0.177713 |
| Mg6 | 2.525101  | 0.001860  | 1.966546  |
| Mg7 | -0.798656 | -1.523349 | -2.126509 |
| Mg8 | -3.462295 | -0.001373 | -1.447433 |
| Mg9 | -3.952496 | 0.001419  | 1.606701  |

|      |           |           |           |
|------|-----------|-----------|-----------|
| Mg10 | -0.580539 | 0.002033  | 2.221081  |
| Mg11 | 3.973055  | 1.507542  | -0.180532 |
| Mg12 | 0.806951  | 2.145389  | 0.445328  |
| Mg13 | 0.807092  | -2.144587 | 0.449255  |

@mg13-isomer07 bp86/6-31G(d) Etot=-2601.157006 Eb=-12.11

|      |           |           |           |
|------|-----------|-----------|-----------|
| Mg1  | 0.581622  | 0.971483  | 1.881009  |
| Mg2  | 3.660855  | 0.361555  | 1.697855  |
| Mg3  | -0.581732 | 0.972727  | -1.880473 |
| Mg4  | -1.233546 | -1.376719 | 2.288530  |
| Mg5  | 2.400069  | 1.405224  | -0.854636 |
| Mg6  | 1.233633  | -1.375119 | -2.289370 |
| Mg7  | -3.660898 | 0.362380  | -1.697650 |
| Mg8  | 1.349593  | -1.771536 | 0.768983  |
| Mg9  | -2.400202 | 1.404780  | 0.855406  |
| Mg10 | -0.000007 | 3.206612  | 0.001020  |
| Mg11 | 4.023454  | -1.194932 | -0.863250 |
| Mg12 | -1.349429 | -1.770959 | -0.770013 |
| Mg13 | -4.023413 | -1.195497 | 0.862590  |

@mg13-isomer08 bp86/6-31G(d) Etot=-2601.156178 Eb=-12.07

|      |           |           |           |
|------|-----------|-----------|-----------|
| Mg1  | 2.920235  | -1.069546 | -1.585318 |
| Mg2  | 3.866137  | 1.323278  | -0.000185 |
| Mg3  | 1.216348  | 1.589619  | -1.590489 |
| Mg4  | 2.920108  | -1.069013 | 1.585801  |
| Mg5  | -0.081493 | -1.071052 | -2.614857 |
| Mg6  | 0.601392  | -2.517494 | 0.000503  |
| Mg7  | 1.216240  | 1.590077  | 1.589962  |
| Mg8  | -3.358699 | -1.120526 | -1.652531 |
| Mg9  | -1.027672 | 2.983754  | -0.000406 |
| Mg10 | -0.945897 | 0.057744  | -0.000234 |
| Mg11 | -3.358587 | -1.120294 | 1.652702  |
| Mg12 | -3.886444 | 1.493474  | -0.000064 |
| Mg13 | -0.081669 | -1.070020 | 2.615117  |

@mg13-isomer09 bp86/6-31G(d) Etot=-2601.156169 Eb=-12.07

|      |           |           |           |
|------|-----------|-----------|-----------|
| Mg1  | 0.589714  | 0.000043  | -0.912233 |
| Mg2  | -0.937635 | -2.689382 | -0.395509 |
| Mg3  | -0.937665 | 2.689408  | -0.395482 |
| Mg4  | -3.865972 | -1.934960 | -0.001574 |
| Mg5  | 3.428127  | -0.000043 | -2.005653 |
| Mg6  | 2.324843  | 2.538507  | -0.451818 |
| Mg7  | 0.850129  | 1.554044  | 2.072844  |
| Mg8  | 2.324800  | -2.538500 | -0.451800 |
| Mg9  | 0.850111  | -1.554035 | 2.072886  |
| Mg10 | 3.353361  | -0.000006 | 0.964202  |
| Mg11 | -3.865970 | 1.934952  | -0.001559 |
| Mg12 | -2.381918 | 0.000000  | -1.764278 |
| Mg13 | -1.731924 | -0.000029 | 1.269972  |

@mg13-isomer10 bp86/6-31G(d) Etot=-2601.156023 Eb=-12.06

|      |           |           |           |
|------|-----------|-----------|-----------|
| Mg1  | 0.910829  | -1.888490 | 1.222755  |
| Mg2  | -2.243643 | -2.620515 | 1.423161  |
| Mg3  | 2.243655  | -2.620461 | -1.423198 |
| Mg4  | -3.719474 | -0.585592 | -0.310997 |
| Mg5  | 3.719602  | -0.585633 | 0.310981  |
| Mg6  | -0.910880 | -1.888468 | -1.222832 |
| Mg7  | -1.664305 | 1.009602  | -2.031382 |
| Mg8  | 1.664297  | 1.009601  | 2.031233  |
| Mg9  | -1.214466 | 0.264294  | 1.418407  |
| Mg10 | 3.188340  | 2.460512  | -0.230799 |
| Mg11 | 1.214393  | 0.264272  | -1.418089 |
| Mg12 | -3.188307 | 2.460464  | 0.230731  |
| Mg13 | -0.000042 | 2.720414  | 0.000029  |

@mg13-isomer11 bp86/6-31G(d) Etot=-2601.155712 Eb=-12.04

|      |           |           |           |
|------|-----------|-----------|-----------|
| Mg1  | 3.764444  | -2.539256 | -0.000016 |
| Mg2  | 1.303403  | -1.494026 | -1.536726 |
| Mg3  | 3.143323  | 0.574775  | 0.000008  |
| Mg4  | 1.739695  | 1.387671  | -2.602249 |
| Mg5  | -4.281994 | -2.632198 | 0.000030  |
| Mg6  | -1.251817 | -2.241992 | -0.000119 |
| Mg7  | 1.303317  | -1.494127 | 1.536563  |
| Mg8  | 0.847673  | 2.625376  | 0.000122  |
| Mg9  | -1.011235 | 0.533438  | -1.538523 |
| Mg10 | 1.739680  | 1.387374  | 2.602365  |
| Mg11 | -1.011300 | 0.533367  | 1.538605  |
| Mg12 | -3.968820 | 0.377064  | -0.000081 |
| Mg13 | -2.316368 | 2.982534  | 0.000021  |

@mg13-isomer12 bp86/6-31G(d) Etot=-2601.155373 Eb=-12.03

|      |           |           |           |
|------|-----------|-----------|-----------|
| Mg1  | 0.460569  | 0.138808  | -2.618990 |
| Mg2  | -2.421512 | 0.668260  | 1.621254  |
| Mg3  | -2.405119 | 3.183764  | -0.000376 |
| Mg4  | 1.297997  | -1.309581 | 0.000359  |
| Mg5  | 0.199155  | 1.668989  | 0.000007  |
| Mg6  | 3.357634  | 1.033099  | -1.530993 |
| Mg7  | 3.357340  | 1.032903  | 1.531240  |
| Mg8  | 0.459940  | 0.139108  | 2.619192  |
| Mg9  | 4.485333  | -1.389458 | -0.000035 |
| Mg10 | -1.281299 | -2.134434 | 1.571114  |
| Mg11 | -2.420999 | 0.667965  | -1.621542 |
| Mg12 | -3.808176 | -1.564708 | -0.000250 |
| Mg13 | -1.280864 | -2.134715 | -1.570981 |

@mg13-isomer13 bp86/6-31G(d) Etot=-2601.155196 Eb=-12.02

|      |           |           |           |
|------|-----------|-----------|-----------|
| Mg1  | 0.302309  | 1.411150  | 1.615255  |
| Mg2  | -0.808516 | -1.739838 | -1.229737 |
| Mg3  | -1.634663 | 2.535833  | -0.542702 |
| Mg4  | 1.559272  | -1.332080 | 0.708986  |
| Mg5  | 3.441270  | 1.581351  | 0.552376  |
| Mg6  | -3.350908 | 0.042428  | -0.369277 |
| Mg7  | 4.687482  | -1.117771 | 1.110044  |
| Mg8  | -2.666978 | 1.602548  | 2.184846  |
| Mg9  | 0.834244  | 0.839120  | -1.438225 |
| Mg10 | -1.793015 | 0.652355  | -2.913335 |
| Mg11 | -3.171621 | -2.904801 | 0.252845  |
| Mg12 | 3.888413  | -0.417698 | -1.762665 |
| Mg13 | -1.287291 | -1.152597 | 1.831590  |

@mg13-isomer14 bp86/6-31G(d) Etot=-2601.155178 Eb=-12.02

|      |           |           |           |
|------|-----------|-----------|-----------|
| Mg1  | 3.760576  | 1.451706  | -0.959638 |
| Mg2  | -1.078736 | -2.144953 | -1.632612 |
| Mg3  | 1.312724  | -0.228020 | -2.138323 |
| Mg4  | 4.053937  | -1.476637 | -0.405001 |
| Mg5  | -3.805050 | -1.077349 | -0.819730 |
| Mg6  | -1.568894 | 0.794015  | -1.935896 |
| Mg7  | 3.094651  | 0.418581  | 1.843116  |
| Mg8  | 0.864461  | -1.548058 | 0.614506  |
| Mg9  | -2.044141 | 3.294228  | -0.340808 |
| Mg10 | 0.396130  | 1.593260  | 0.268356  |
| Mg11 | -2.720631 | 0.890859  | 1.223692  |
| Mg12 | -2.070045 | -2.050300 | 1.457874  |
| Mg13 | -0.194981 | 0.082668  | 2.824464  |

@mg13-isomer15 bp86/6-31G(d) Etot=-2601.155158 Eb=-12.02

|     |           |           |           |
|-----|-----------|-----------|-----------|
| Mg1 | -2.867198 | -2.506615 | -0.625171 |
| Mg2 | -1.247730 | -1.910822 | 1.886896  |



|      |           |           |           |
|------|-----------|-----------|-----------|
| Mg3  | 0.174760  | -2.419092 | -0.819193 |
| Mg4  | -3.039265 | 0.304418  | 0.671025  |
| Mg5  | 1.347761  | -0.277356 | 1.265109  |
| Mg6  | -1.559735 | -0.038381 | -2.005790 |
| Mg7  | -3.184829 | 2.573433  | -1.282586 |
| Mg8  | -0.893078 | 0.988550  | 2.846807  |
| Mg9  | -0.427752 | 2.102547  | -0.008777 |
| Mg10 | 1.521898  | 0.301753  | -1.664926 |
| Mg11 | 3.194276  | -2.383315 | -0.298559 |
| Mg12 | 4.388162  | 0.422019  | -0.133074 |
| Mg13 | 2.592730  | 2.842860  | 0.168237  |

@mg13-isomer16 bp86/6-31G(d) Etot=-2601.154950 Eb=-12.01

|      |           |           |           |
|------|-----------|-----------|-----------|
| Mg1  | -1.517430 | 2.603141  | -1.350763 |
| Mg2  | 1.009985  | 2.154454  | 0.122237  |
| Mg3  | 1.638278  | -2.338297 | -1.893648 |
| Mg4  | -1.311278 | 0.581517  | 1.344673  |
| Mg5  | -2.772582 | -2.047840 | -0.166653 |
| Mg6  | 3.208398  | -1.414281 | 0.552155  |
| Mg7  | -4.341407 | -0.106686 | 1.684090  |
| Mg8  | 0.174998  | -2.077297 | 0.872789  |
| Mg9  | -0.315587 | -0.135441 | -1.592761 |
| Mg10 | 2.769125  | 0.508558  | -1.892496 |
| Mg11 | 3.798817  | 1.488348  | 0.995496  |
| Mg12 | -3.795312 | 0.593809  | -1.266307 |
| Mg13 | 1.453995  | 0.190015  | 2.591187  |

@mg13-isomer17 bp86/6-31G(d) Etot=-2601.154819 Eb=-12.00

|      |           |           |           |
|------|-----------|-----------|-----------|
| Mg1  | -2.329342 | 3.141685  | -0.000019 |
| Mg2  | -3.591781 | -2.697100 | 0.000267  |
| Mg3  | -3.108965 | 0.265631  | -0.000042 |
| Mg4  | -1.008146 | -1.629683 | -1.487801 |
| Mg5  | 0.752190  | 2.528948  | -0.000020 |
| Mg6  | -1.007835 | -1.629490 | 1.487516  |
| Mg7  | -1.076899 | 1.327732  | -2.233759 |
| Mg8  | 3.644096  | 1.728853  | -0.000166 |
| Mg9  | 1.547352  | -2.930577 | 0.000073  |
| Mg10 | 1.580624  | -0.046789 | -1.560963 |
| Mg11 | 4.094807  | -1.340517 | -0.000021 |
| Mg12 | -1.076976 | 1.327793  | 2.233731  |
| Mg13 | 1.580876  | -0.046485 | 1.561202  |

@mg13-isomer18 bp86/6-31G(d) Etot=-2601.154755 Eb=-12.00

|      |           |           |           |
|------|-----------|-----------|-----------|
| Mg1  | 2.514487  | -1.797147 | 1.327262  |
| Mg2  | 4.003906  | -0.543975 | -1.036101 |
| Mg3  | 3.119514  | 1.131789  | 1.213683  |
| Mg4  | 0.000019  | -0.000155 | 2.020660  |
| Mg5  | -3.119646 | -1.132069 | 1.213483  |
| Mg6  | -0.383270 | -2.611021 | 0.718167  |
| Mg7  | 0.953800  | -1.186112 | -1.481965 |
| Mg8  | -2.026984 | -1.626068 | -1.751840 |
| Mg9  | 2.027081  | 1.626414  | -1.751585 |
| Mg10 | -0.953771 | 1.186469  | -1.481866 |
| Mg11 | 0.383227  | 2.610954  | 0.718610  |
| Mg12 | -4.003896 | 0.544137  | -1.036078 |
| Mg13 | -2.514468 | 1.796785  | 1.327570  |

@mg13-isomer19 bp86/6-31G(d) Etot=-2601.154742 Eb=-12.00

|     |           |           |           |
|-----|-----------|-----------|-----------|
| Mg1 | -4.328033 | 1.334376  | -0.798446 |
| Mg2 | -2.990938 | -1.333435 | -0.263556 |
| Mg3 | -1.877986 | -1.377046 | 2.589341  |
| Mg4 | -2.100352 | 1.360792  | 1.336141  |
| Mg5 | -1.425470 | 1.176863  | -1.722055 |
| Mg6 | -0.048803 | -2.308054 | 0.322188  |

|      |           |           |           |
|------|-----------|-----------|-----------|
| Mg7  | 3.193030  | -1.563772 | 0.816836  |
| Mg8  | -0.914623 | -1.702785 | -2.503055 |
| Mg9  | 0.656569  | 0.185534  | 1.926150  |
| Mg10 | 0.439598  | 2.639666  | 0.170484  |
| Mg11 | 1.343387  | -0.047186 | -1.326209 |
| Mg12 | 3.519620  | 1.550047  | 0.971608  |
| Mg13 | 4.534003  | 0.084999  | -1.519427 |

@mg13-isomer20 bp86/6-31G(d) Etot=-2601.154411 Eb=-11.98

|      |           |           |           |
|------|-----------|-----------|-----------|
| Mg1  | 1.608873  | 0.357613  | -1.529855 |
| Mg2  | -0.056966 | 1.602232  | 0.860513  |
| Mg3  | -2.138838 | -2.303352 | 0.892232  |
| Mg4  | 3.978519  | -1.680269 | 0.108574  |
| Mg5  | -1.187418 | -0.314437 | 2.976863  |
| Mg6  | -3.472316 | -1.239430 | -1.668589 |
| Mg7  | -2.356080 | 3.267421  | -0.172074 |
| Mg8  | -1.362745 | 1.019052  | -1.906079 |
| Mg9  | -0.507167 | -1.884859 | -1.781538 |
| Mg10 | 4.623737  | 1.014887  | -1.154127 |
| Mg11 | 3.184967  | 0.928749  | 1.554012  |
| Mg12 | -3.136704 | 0.578732  | 0.830610  |
| Mg13 | 0.822138  | -1.346340 | 0.989459  |

@mg13-isomer21 bp86/6-31G(d) Etot=-2601.154261 Eb=-11.97

|      |           |           |           |
|------|-----------|-----------|-----------|
| Mg1  | 1.200547  | 1.957029  | -0.000016 |
| Mg2  | -1.954192 | -1.384042 | 2.615313  |
| Mg3  | -1.299563 | 1.403992  | -1.588309 |
| Mg4  | 0.855120  | -0.709232 | 1.605691  |
| Mg5  | -3.315897 | -0.613534 | 0.000047  |
| Mg6  | -1.954310 | -1.383987 | -2.615300 |
| Mg7  | 3.565432  | -1.668255 | -0.000095 |
| Mg8  | 3.995326  | 0.920788  | -1.524572 |
| Mg9  | -3.656928 | 2.425291  | 0.000047  |
| Mg10 | 0.855062  | -0.709188 | -1.605784 |
| Mg11 | 3.995316  | 0.920647  | 1.524659  |
| Mg12 | -1.299511 | 1.403964  | 1.588350  |
| Mg13 | -0.986401 | -2.563475 | -0.000030 |

@mg13-isomer22 bp86/6-31G(d) Etot=-2601.153932 Eb=-11.96

|      |           |           |           |
|------|-----------|-----------|-----------|
| Mg1  | -3.219004 | 2.623697  | 0.000002  |
| Mg2  | 0.000007  | 2.788526  | 0.000010  |
| Mg3  | -1.544228 | 0.452796  | 1.530460  |
| Mg4  | -1.544354 | 0.452757  | -1.530532 |
| Mg5  | 3.219002  | 2.623711  | -0.000165 |
| Mg6  | 1.544414  | 0.452813  | 1.530522  |
| Mg7  | -4.084975 | -0.498513 | 0.000115  |
| Mg8  | 1.544183  | 0.452649  | -1.530420 |
| Mg9  | -0.000010 | -1.991903 | 2.510556  |
| Mg10 | 4.085000  | -0.498484 | 0.000008  |
| Mg11 | -0.000116 | -1.991958 | -2.510563 |
| Mg12 | -1.734684 | -2.433021 | 0.000034  |
| Mg13 | 1.734766  | -2.433070 | -0.000027 |

@mg13-isomer23 bp86/6-31G(d) Etot=-2601.153872 Eb=-11.96

|      |           |           |           |
|------|-----------|-----------|-----------|
| Mg1  | -2.981009 | 2.721371  | -0.000111 |
| Mg2  | 1.525418  | 0.335363  | -1.620383 |
| Mg3  | 2.981144  | 2.721297  | -0.000023 |
| Mg4  | -0.000083 | -2.276214 | -1.710400 |
| Mg5  | -4.178807 | 0.012729  | 0.000151  |
| Mg6  | 1.525625  | 0.335559  | 1.620647  |
| Mg7  | -1.525466 | 0.335587  | 1.620469  |
| Mg8  | 2.522588  | -2.418985 | 0.000013  |
| Mg9  | -1.525628 | 0.335451  | -1.620608 |
| Mg10 | 0.000043  | 2.580208  | -0.000074 |

|                                                          |           |           |           |  |
|----------------------------------------------------------|-----------|-----------|-----------|--|
| Mg11                                                     | 4.178857  | 0.012635  | -0.000196 |  |
| Mg12                                                     | -0.000016 | -2.276051 | 1.710446  |  |
| Mg13                                                     | -2.522665 | -2.418950 | 0.000069  |  |
| @mg13-isomer24 bp86/6-31G(d) Etot=-2601.153390 Eb=-11.93 |           |           |           |  |
| Mg1                                                      | -1.826632 | 3.071149  | 1.690330  |  |
| Mg2                                                      | 2.470058  | 0.279907  | -1.918064 |  |
| Mg3                                                      | 1.982360  | -0.765890 | 1.519336  |  |
| Mg4                                                      | -0.521735 | -2.717154 | 1.752774  |  |
| Mg5                                                      | -1.055278 | 0.197934  | 2.134715  |  |
| Mg6                                                      | -0.161168 | -1.307273 | -0.816181 |  |
| Mg7                                                      | -2.984062 | -1.146668 | -2.248932 |  |
| Mg8                                                      | -3.261830 | -1.627999 | 0.735108  |  |
| Mg9                                                      | 3.860272  | 1.464616  | 0.533449  |  |
| Mg10                                                     | 0.484177  | 1.848722  | 0.032717  |  |
| Mg11                                                     | -2.802012 | 1.242604  | -0.419822 |  |
| Mg12                                                     | 4.422586  | -1.413596 | -0.304794 |  |
| Mg13                                                     | -0.606737 | 0.873646  | -2.690637 |  |
| @mg13-isomer25 bp86/6-31G(d) Etot=-2601.153356 Eb=-11.93 |           |           |           |  |
| Mg1                                                      | -0.775865 | -1.533871 | 1.554741  |  |
| Mg2                                                      | 2.031214  | 0.000033  | 1.431995  |  |
| Mg3                                                      | -0.775846 | 1.533875  | 1.554776  |  |
| Mg4                                                      | -3.019232 | 0.000039  | 3.049366  |  |
| Mg5                                                      | -1.625951 | -2.452126 | -1.219774 |  |
| Mg6                                                      | 1.441778  | -2.677642 | -0.484640 |  |
| Mg7                                                      | 4.217713  | 1.555615  | -0.064414 |  |
| Mg8                                                      | -3.215361 | -0.000029 | 0.071104  |  |
| Mg9                                                      | 0.236396  | -0.000051 | -1.291571 |  |
| Mg10                                                     | -1.625999 | 2.452104  | -1.219729 |  |
| Mg11                                                     | 1.441691  | 2.677565  | -0.484753 |  |
| Mg12                                                     | 4.217710  | -1.555522 | -0.064334 |  |
| Mg13                                                     | -2.548248 | 0.000011  | -2.832767 |  |
| @mg13-isomer26 bp86/6-31G(d) Etot=-2601.153068 Eb=-11.92 |           |           |           |  |
| Mg1                                                      | 1.102751  | 0.018270  | -1.487660 |  |
| Mg2                                                      | -2.079835 | 0.721007  | 1.559356  |  |
| Mg3                                                      | 3.068514  | -2.101331 | 0.009262  |  |
| Mg4                                                      | 2.885545  | 2.930743  | 0.005216  |  |
| Mg5                                                      | -1.204986 | -1.912318 | 2.631852  |  |
| Mg6                                                      | -2.060992 | 0.731763  | -1.565180 |  |
| Mg7                                                      | -0.114855 | 2.502590  | 0.013130  |  |
| Mg8                                                      | 1.084619  | 0.005998  | 1.506014  |  |
| Mg9                                                      | 0.176765  | -2.646243 | -0.003308 |  |
| Mg10                                                     | 4.556611  | 0.497278  | -0.002748 |  |
| Mg11                                                     | -1.176391 | -1.893888 | -2.648062 |  |
| Mg12                                                     | -3.427398 | 2.997637  | -0.002511 |  |
| Mg13                                                     | -2.810348 | -1.851506 | -0.015362 |  |
| @mg13-isomer27 bp86/6-31G(d) Etot=-2601.152575 Eb=-11.89 |           |           |           |  |
| Mg1                                                      | 3.629642  | 1.633741  | -0.010840 |  |
| Mg2                                                      | 1.181217  | -0.296122 | -1.317377 |  |
| Mg3                                                      | -0.827460 | -1.686421 | 0.738060  |  |
| Mg4                                                      | -1.919126 | -0.246520 | -1.760455 |  |
| Mg5                                                      | -3.495012 | -0.091971 | 0.891910  |  |
| Mg6                                                      | -0.256946 | 2.194717  | -2.361504 |  |
| Mg7                                                      | 4.145183  | -1.370528 | -0.276039 |  |
| Mg8                                                      | -1.107018 | 1.036077  | 2.481282  |  |
| Mg9                                                      | 1.777549  | -3.151854 | 0.005661  |  |
| Mg10                                                     | 0.794836  | 2.468468  | 0.507043  |  |
| Mg11                                                     | -2.252530 | 2.542143  | 0.049826  |  |
| Mg12                                                     | -3.339637 | -2.804894 | -0.633162 |  |
| Mg13                                                     | 1.669303  | -0.226835 | 1.685596  |  |

@mg13-isomer28 bp86/6-31G(d) Etot=-2601.152534 Eb=-11.89

|      |           |           |           |
|------|-----------|-----------|-----------|
| Mg1  | 3.187962  | -0.227394 | -0.000049 |
| Mg2  | 4.470631  | 2.544283  | 0.000027  |
| Mg3  | 3.670356  | -3.243172 | 0.000014  |
| Mg4  | 1.438913  | 2.626692  | 0.000062  |
| Mg5  | -2.402396 | 0.959104  | 2.637378  |
| Mg6  | -1.586023 | 2.332679  | 0.000015  |
| Mg7  | 0.291487  | 0.179139  | -1.528864 |
| Mg8  | 0.291469  | 0.179077  | 1.528822  |
| Mg9  | -2.402402 | 0.959148  | -2.637374 |
| Mg10 | -3.635672 | 0.118348  | 0.000004  |
| Mg11 | 0.599539  | -2.538686 | -0.000028 |
| Mg12 | -1.961921 | -1.944574 | -1.541359 |
| Mg13 | -1.961943 | -1.944643 | 1.541350  |

@mg13-isomer29 bp86/6-31G(d) Etot=-2601.152417 Eb=-11.89

|      |           |           |           |
|------|-----------|-----------|-----------|
| Mg1  | -3.582087 | 0.334056  | -1.759010 |
| Mg2  | 0.612558  | 0.559089  | -2.943008 |
| Mg3  | -0.835927 | 1.754270  | -0.612449 |
| Mg4  | 2.278321  | 1.748744  | -0.610388 |
| Mg5  | -0.835958 | -1.407450 | -1.213089 |
| Mg6  | -3.582114 | 1.356304  | 1.168757  |
| Mg7  | -3.582207 | -1.690340 | 0.590174  |
| Mg8  | 2.278107  | -1.403042 | -1.209120 |
| Mg9  | 0.612325  | 2.269310  | 1.955654  |
| Mg10 | 4.582740  | -0.000199 | 0.000137  |
| Mg11 | -0.836037 | -0.346760 | 1.825338  |
| Mg12 | 2.277981  | -0.345648 | 1.819614  |
| Mg13 | 0.612298  | -2.828334 | 0.987388  |

@mg13-isomer30 bp86/6-31G(d) Etot=-2601.152206 Eb=-11.87

|      |           |           |           |
|------|-----------|-----------|-----------|
| Mg1  | 0.446330  | 2.106500  | -0.061712 |
| Mg2  | 0.746245  | 0.903387  | 2.913403  |
| Mg3  | -2.632226 | -2.387022 | 0.156078  |
| Mg4  | 3.330563  | 2.635575  | -1.078943 |
| Mg5  | 0.333039  | -1.698105 | 1.493452  |
| Mg6  | -4.307642 | 0.159184  | -0.387501 |
| Mg7  | 3.027284  | 0.313248  | 0.863724  |
| Mg8  | -1.309649 | 0.042698  | -1.566505 |
| Mg9  | 1.795769  | -0.090885 | -1.842038 |
| Mg10 | 0.105300  | -2.696763 | -1.273188 |
| Mg11 | 2.951597  | -2.581747 | -0.106698 |
| Mg12 | -2.630293 | 2.757925  | -0.560354 |
| Mg13 | -1.856316 | 0.536005  | 1.450281  |

@mg13-isomer31 bp86/6-31G(d) Etot=-2601.152194 Eb=-11.87

|      |           |           |           |
|------|-----------|-----------|-----------|
| Mg1  | -2.975061 | -2.662721 | -0.073586 |
| Mg2  | -4.367271 | -0.000075 | -0.045572 |
| Mg3  | -1.680409 | 0.000179  | 1.676429  |
| Mg4  | -1.226167 | -0.000054 | -1.423233 |
| Mg5  | -2.975207 | 2.662646  | -0.073457 |
| Mg6  | -0.034669 | -2.287191 | 0.515515  |
| Mg7  | 1.313295  | -1.520814 | -2.107178 |
| Mg8  | -0.034651 | 2.287334  | 0.515191  |
| Mg9  | 1.313355  | 1.520553  | -2.107444 |
| Mg10 | 2.882663  | -2.654521 | 0.758432  |
| Mg11 | 1.498936  | 0.000147  | 2.013278  |
| Mg12 | 3.402486  | -0.000033 | -0.406604 |
| Mg13 | 2.882701  | 2.654550  | 0.758229  |

@mg13-isomer32 bp86/6-31G(d) Etot=-2601.152084 Eb=-11.87

|     |           |          |          |
|-----|-----------|----------|----------|
| Mg1 | -1.247981 | 0.000053 | 1.299132 |
| Mg2 | 3.072502  | 2.632232 | 0.117625 |
| Mg3 | 1.860663  | 0.000042 | 1.284474 |

|      |           |           |           |
|------|-----------|-----------|-----------|
| Mg4  | 0.242557  | 2.634726  | 1.604708  |
| Mg5  | -2.104209 | -0.000075 | -1.991096 |
| Mg6  | 0.418794  | -1.550804 | -1.290812 |
| Mg7  | 3.142379  | -0.000040 | -1.505126 |
| Mg8  | 0.242572  | -2.634550 | 1.605010  |
| Mg9  | -2.440268 | -2.507936 | -0.122194 |
| Mg10 | -4.237932 | -0.000008 | 0.293771  |
| Mg11 | 3.072427  | -2.632270 | 0.117581  |
| Mg12 | 0.418819  | 1.550689  | -1.290908 |
| Mg13 | -2.440323 | 2.507941  | -0.122166 |

@mg13-isomer33 bp86/6-31G(d) Etot=-2601.152007 Eb=-11.87

|      |           |           |           |
|------|-----------|-----------|-----------|
| Mg1  | 0.933120  | 1.751733  | -0.622193 |
| Mg2  | -1.560424 | 0.307750  | -1.666299 |
| Mg3  | -1.193706 | 0.654211  | 1.380702  |
| Mg4  | -4.129941 | 1.305955  | 0.159244  |
| Mg5  | -0.785005 | -2.575471 | -0.952941 |
| Mg6  | 1.782125  | 0.052231  | 1.867357  |
| Mg7  | 2.125649  | -2.636298 | 0.085169  |
| Mg8  | -3.285328 | -1.609581 | 0.409477  |
| Mg9  | -1.820920 | 3.165790  | -0.306739 |
| Mg10 | 1.195265  | -0.848530 | -2.452738 |
| Mg11 | 3.541339  | 2.663861  | 0.741780  |
| Mg12 | 3.547703  | -0.055028 | -0.616884 |
| Mg13 | -0.349878 | -2.176624 | 1.974066  |

@mg13-isomer34 bp86/6-31G(d) Etot=-2601.151878 Eb=-11.86

|      |           |           |           |
|------|-----------|-----------|-----------|
| Mg1  | -0.136471 | 2.103073  | 2.508347  |
| Mg2  | -3.153722 | -2.610225 | 0.978957  |
| Mg3  | -1.208505 | 1.194746  | -2.268885 |
| Mg4  | -1.441181 | -1.794940 | -1.419265 |
| Mg5  | -3.690394 | 0.183589  | -0.452312 |
| Mg6  | 3.732310  | -1.922909 | 0.011479  |
| Mg7  | 1.314819  | -0.424371 | -1.545306 |
| Mg8  | 0.982041  | 2.426380  | -0.434847 |
| Mg9  | -0.989485 | -0.386894 | 1.160011  |
| Mg10 | 0.867973  | -2.854302 | 0.474585  |
| Mg11 | 3.826479  | 1.233820  | -0.688942 |
| Mg12 | 2.047428  | 0.107339  | 1.516447  |
| Mg13 | -2.151292 | 2.744694  | 0.159730  |

@mg13-isomer35 bp86/6-31G(d) Etot=-2601.151836 Eb=-11.86

|      |           |           |           |
|------|-----------|-----------|-----------|
| Mg1  | 1.076182  | -0.359215 | 1.499965  |
| Mg2  | 0.897142  | 0.099785  | -1.493411 |
| Mg3  | -1.152556 | -2.643521 | 1.217075  |
| Mg4  | 1.934522  | 2.584144  | 0.258157  |
| Mg5  | 3.862117  | -1.027157 | -0.193757 |
| Mg6  | -3.081228 | -0.570439 | 0.156962  |
| Mg7  | 4.783206  | 1.838248  | -0.013262 |
| Mg8  | -1.656257 | -0.110074 | 2.844540  |
| Mg9  | 1.473027  | -2.800346 | -0.447100 |
| Mg10 | -1.292222 | -2.143218 | -1.801222 |
| Mg11 | -3.911562 | 2.503899  | -0.236986 |
| Mg12 | -1.981303 | 0.840174  | -2.267711 |
| Mg13 | -0.951069 | 1.787721  | 0.476752  |

@mg13-isomer36 bp86/6-31G(d) Etot=-2601.151832 Eb=-11.86

|     |           |           |           |
|-----|-----------|-----------|-----------|
| Mg1 | -0.258462 | 0.673552  | -2.066220 |
| Mg2 | -1.243981 | 0.477092  | 0.899220  |
| Mg3 | -4.394907 | 1.238420  | 0.250435  |
| Mg4 | 0.902847  | 2.471280  | 0.087160  |
| Mg5 | 1.535043  | -1.802296 | -2.682757 |
| Mg6 | 2.774399  | 0.227567  | -0.873726 |
| Mg7 | -3.479529 | -1.671164 | 0.576777  |

|      |           |           |           |
|------|-----------|-----------|-----------|
| Mg8  | 2.071543  | -2.543642 | 0.329076  |
| Mg9  | -0.927731 | -2.196581 | -0.890110 |
| Mg10 | -2.188755 | 2.957694  | -0.818930 |
| Mg11 | -0.437674 | -2.190719 | 2.075046  |
| Mg12 | 1.746671  | 0.071866  | 2.034693  |
| Mg13 | 3.900536  | 2.286931  | 1.079336  |

@mg13-isomer37 bp86/6-31G(d) Etot=-2601.151669 Eb=-11.85

|      |           |           |           |
|------|-----------|-----------|-----------|
| Mg1  | 3.951948  | 0.700342  | -1.474733 |
| Mg2  | 1.203824  | -0.077177 | -2.623392 |
| Mg3  | -4.197605 | 1.199777  | -0.000278 |
| Mg4  | 0.959328  | 1.481452  | -0.000339 |
| Mg5  | -1.665562 | 0.474168  | -1.713739 |
| Mg6  | 3.951980  | 0.700879  | 1.474495  |
| Mg7  | -1.643461 | 3.016544  | -0.000546 |
| Mg8  | -0.575294 | -2.305645 | -1.512590 |
| Mg9  | 1.203776  | -0.076027 | 2.623408  |
| Mg10 | 2.288129  | -1.535074 | 0.000295  |
| Mg11 | -3.236233 | -1.749029 | 0.000368  |
| Mg12 | -1.665664 | 0.474780  | 1.713582  |
| Mg13 | -0.575166 | -2.304990 | 1.513468  |

@mg13-isomer38 bp86/6-31G(d) Etot=-2601.151412 Eb=-11.84

|      |           |           |           |
|------|-----------|-----------|-----------|
| Mg1  | 0.863171  | -0.597556 | 2.743161  |
| Mg2  | 2.609347  | 1.918242  | 2.043291  |
| Mg3  | 3.188069  | -0.487919 | 0.403176  |
| Mg4  | 2.357488  | 2.185838  | -0.975405 |
| Mg5  | -0.180493 | 1.198459  | 0.692181  |
| Mg6  | -2.199709 | -0.835346 | 1.942395  |
| Mg7  | 2.890619  | -2.785528 | -1.469337 |
| Mg8  | 0.264611  | -2.166228 | 0.218119  |
| Mg9  | 1.045547  | -0.402620 | -2.120714 |
| Mg10 | -3.492630 | 1.671252  | -0.097143 |
| Mg11 | -0.676234 | 2.118862  | -2.035256 |
| Mg12 | -2.111320 | -0.685357 | -1.522225 |
| Mg13 | -4.558465 | -1.132099 | 0.177756  |

@mg13-isomer39 bp86/6-31G(d) Etot=-2601.151236 Eb=-11.83

|      |           |           |           |
|------|-----------|-----------|-----------|
| Mg1  | 0.812079  | -2.659856 | 0.660920  |
| Mg2  | -2.477382 | -2.660121 | 1.248339  |
| Mg3  | 3.746200  | -1.841298 | -0.039280 |
| Mg4  | -0.814666 | 0.000020  | 1.453544  |
| Mg5  | 2.290211  | -0.000010 | 1.833292  |
| Mg6  | 3.746249  | 1.841249  | -0.039287 |
| Mg7  | -3.755467 | 0.000056  | 0.270664  |
| Mg8  | -2.477310 | 2.660235  | 1.248149  |
| Mg9  | 1.327528  | 0.000061  | -1.033810 |
| Mg10 | -1.487085 | -1.638235 | -1.320357 |
| Mg11 | 0.812106  | 2.659907  | 0.660869  |
| Mg12 | -1.487020 | 1.638173  | -1.320493 |
| Mg13 | -0.235443 | -0.000181 | -3.622549 |

@mg13-isomer40 bp86/6-31G(d) Etot=-2601.151200 Eb=-11.83

|      |           |           |           |
|------|-----------|-----------|-----------|
| Mg1  | 3.139007  | 1.740782  | -1.540514 |
| Mg2  | -2.722281 | 2.654363  | -0.097922 |
| Mg3  | 2.194914  | 1.220325  | 1.183937  |
| Mg4  | 1.044635  | -0.493607 | -1.179747 |
| Mg5  | -0.639330 | 1.907615  | 2.194016  |
| Mg6  | 0.203675  | 2.490402  | -0.868470 |
| Mg7  | 4.101009  | -0.924884 | -0.230772 |
| Mg8  | -2.633340 | -0.180452 | 1.096737  |
| Mg9  | 0.249583  | -1.046920 | 2.133471  |
| Mg10 | 2.089724  | -3.077898 | 0.309793  |
| Mg11 | -1.950983 | 0.215709  | -1.845991 |

|                                                          |           |           |           |  |
|----------------------------------------------------------|-----------|-----------|-----------|--|
| Mg12                                                     | -4.040045 | -2.021908 | -0.878590 |  |
| Mg13                                                     | -1.036569 | -2.483528 | -0.275949 |  |
| @mg13-isomer41 bp86/6-31G(d) Etot=-2601.151127 Eb=-11.82 |           |           |           |  |
| Mg1                                                      | -1.079528 | 1.591782  | 1.579709  |  |
| Mg2                                                      | -3.345905 | 2.999834  | -0.000423 |  |
| Mg3                                                      | -1.079033 | -1.591171 | 1.579970  |  |
| Mg4                                                      | -1.079549 | 1.591199  | -1.580196 |  |
| Mg5                                                      | 1.285952  | 0.000559  | 2.648287  |  |
| Mg6                                                      | -1.079177 | -1.591881 | -1.579608 |  |
| Mg7                                                      | -3.323821 | -0.000190 | -0.000015 |  |
| Mg8                                                      | 1.743658  | -1.608089 | 0.000185  |  |
| Mg9                                                      | 1.742815  | 1.607960  | -0.000217 |  |
| Mg10                                                     | 4.137070  | 0.000007  | -1.481035 |  |
| Mg11                                                     | -3.345419 | -3.000213 | 0.000598  |  |
| Mg12                                                     | 4.137053  | 0.000504  | 1.481051  |  |
| Mg13                                                     | 1.285885  | -0.000303 | -2.648306 |  |
| @mg13-isomer42 bp86/6-31G(d) Etot=-2601.150767 Eb=-11.81 |           |           |           |  |
| Mg1                                                      | -0.727604 | -2.201762 | 0.591831  |  |
| Mg2                                                      | -1.128477 | 0.577444  | -1.472390 |  |
| Mg3                                                      | 2.928194  | 2.962210  | -0.307859 |  |
| Mg4                                                      | -3.382366 | 2.289837  | -0.082688 |  |
| Mg5                                                      | 0.500332  | -1.191767 | 3.105797  |  |
| Mg6                                                      | -0.289806 | 3.084838  | -0.082941 |  |
| Mg7                                                      | -1.586662 | 0.696245  | 1.766261  |  |
| Mg8                                                      | 3.902139  | 0.081101  | -0.875531 |  |
| Mg9                                                      | 2.653789  | -2.319397 | 0.691085  |  |
| Mg10                                                     | -3.596504 | -0.913814 | 0.022760  |  |
| Mg11                                                     | 1.285978  | 0.540391  | 0.647085  |  |
| Mg12                                                     | -1.806282 | -2.315278 | -2.109295 |  |
| Mg13                                                     | 1.247269  | -1.290048 | -1.894115 |  |
| @mg13-isomer43 bp86/6-31G(d) Etot=-2601.150658 Eb=-11.80 |           |           |           |  |
| Mg1                                                      | 0.943212  | 1.253933  | -1.758000 |  |
| Mg2                                                      | 3.843266  | 0.911516  | -0.455450 |  |
| Mg3                                                      | 1.719385  | 2.717160  | 0.832514  |  |
| Mg4                                                      | -1.263617 | 2.917700  | -0.013867 |  |
| Mg5                                                      | -0.870795 | 1.331911  | 2.574965  |  |
| Mg6                                                      | 1.315657  | -0.298065 | 0.919572  |  |
| Mg7                                                      | 4.030332  | -2.075528 | -0.098647 |  |
| Mg8                                                      | -2.098503 | 1.299976  | -2.413850 |  |
| Mg9                                                      | -0.895407 | -1.230279 | -1.284432 |  |
| Mg10                                                     | -1.260902 | -1.675544 | 1.651828  |  |
| Mg11                                                     | 1.202583  | -3.162761 | -0.176645 |  |
| Mg12                                                     | -3.024365 | 0.515781  | 0.450345  |  |
| Mg13                                                     | -3.640846 | -2.505799 | -0.228333 |  |
| @mg13-isomer44 bp86/6-31G(d) Etot=-2601.150463 Eb=-11.79 |           |           |           |  |
| Mg1                                                      | 1.533702  | -2.379163 | 0.368462  |  |
| Mg2                                                      | 3.037409  | 0.378457  | 1.786708  |  |
| Mg3                                                      | 0.000008  | 0.283348  | 0.972584  |  |
| Mg4                                                      | -1.533698 | -2.379309 | 0.368427  |  |
| Mg5                                                      | 2.605977  | 0.442654  | -1.141878 |  |
| Mg6                                                      | -3.037349 | 0.378543  | 1.786749  |  |
| Mg7                                                      | 1.653266  | 2.871379  | 0.510004  |  |
| Mg8                                                      | -0.000071 | -1.118913 | -2.189731 |  |
| Mg9                                                      | -1.653211 | 2.871362  | 0.509967  |  |
| Mg10                                                     | -4.428754 | -1.866072 | 0.090895  |  |
| Mg11                                                     | -0.000025 | 1.941110  | -2.011109 |  |
| Mg12                                                     | -2.606103 | 0.442662  | -1.141868 |  |
| Mg13                                                     | 4.428851  | -1.866058 | 0.090790  |  |
| @mg13-isomer45 bp86/6-31G(d) Etot=-2601.150389 Eb=-11.79 |           |           |           |  |

|      |           |           |           |
|------|-----------|-----------|-----------|
| Mg1  | -0.431124 | 1.425096  | 1.917359  |
| Mg2  | -3.571096 | -2.128726 | -0.239651 |
| Mg3  | 0.380350  | 0.722649  | -1.091956 |
| Mg4  | -2.440317 | 0.115868  | -2.171153 |
| Mg5  | 3.570859  | 1.077243  | -0.477260 |
| Mg6  | 4.408212  | -1.760870 | 0.574202  |
| Mg7  | -1.575989 | -1.432589 | 2.148436  |
| Mg8  | -0.648280 | -2.238610 | -0.766926 |
| Mg9  | 1.630438  | 3.271655  | 0.255893  |
| Mg10 | 2.284184  | -1.557294 | -1.607525 |
| Mg11 | -3.287617 | 0.737091  | 0.734407  |
| Mg12 | -1.654522 | 2.839193  | -0.619514 |
| Mg13 | 1.334902  | -1.070706 | 1.343688  |

@mg13-isomer46 bp86/6-31G(d) Etot=-2601.150322 Eb=-11.78

|      |           |           |           |
|------|-----------|-----------|-----------|
| Mg1  | 4.556266  | -0.095782 | 1.516882  |
| Mg2  | 1.643741  | 1.033872  | 1.783265  |
| Mg3  | 2.550554  | -1.569025 | -0.299289 |
| Mg4  | 3.228548  | 1.265184  | -0.989337 |
| Mg5  | -0.079945 | -1.486169 | 1.598267  |
| Mg6  | -1.340109 | 1.304675  | 1.707302  |
| Mg7  | 0.259642  | 2.263692  | -0.756097 |
| Mg8  | 1.082988  | -0.103142 | -2.690333 |
| Mg9  | -2.969234 | -2.514202 | 0.282578  |
| Mg10 | -4.126817 | 0.159109  | 0.974718  |
| Mg11 | -1.635121 | -0.103124 | -1.200786 |
| Mg12 | -0.163936 | -2.686176 | -1.145238 |
| Mg13 | -3.006575 | 2.531088  | -0.781932 |

@mg13-isomer47 bp86/6-31G(d) Etot=-2601.150081 Eb=-11.77

|      |           |           |           |
|------|-----------|-----------|-----------|
| Mg1  | -2.709729 | 0.000111  | -2.055910 |
| Mg2  | -0.854436 | 2.281508  | -1.087293 |
| Mg3  | 0.654931  | 0.000018  | -2.356204 |
| Mg4  | -3.366429 | 1.500589  | 0.659974  |
| Mg5  | -0.854509 | -2.281459 | -1.087426 |
| Mg6  | -3.366446 | -1.500592 | 0.659942  |
| Mg7  | 3.876933  | -0.000037 | -1.489933 |
| Mg8  | 2.074253  | 1.896217  | 0.165256  |
| Mg9  | -0.614579 | 2.674533  | 1.963419  |
| Mg10 | 2.074117  | -1.896152 | 0.165263  |
| Mg11 | -0.351531 | -0.000027 | 0.923541  |
| Mg12 | 4.052085  | -0.000096 | 1.576049  |
| Mg13 | -0.614659 | -2.674613 | 1.963323  |

@mg13-isomer48 bp86/6-31G(d) Etot=-2601.149999 Eb=-11.77

|      |           |           |           |
|------|-----------|-----------|-----------|
| Mg1  | -2.321361 | 1.209520  | 1.014994  |
| Mg2  | -1.583625 | 2.408600  | -1.805804 |
| Mg3  | 0.516102  | 2.291175  | 0.544801  |
| Mg4  | -1.958574 | -2.053203 | 0.293904  |
| Mg5  | -4.485647 | -0.807634 | 1.348873  |
| Mg6  | 0.340610  | -0.542542 | 1.929861  |
| Mg7  | -3.614730 | -0.001158 | -1.507254 |
| Mg8  | 2.857471  | 1.315161  | 2.291957  |
| Mg9  | -0.008426 | -0.107089 | -1.376589 |
| Mg10 | 3.078321  | 1.401254  | -0.880177 |
| Mg11 | 0.958806  | -2.684147 | -0.200801 |
| Mg12 | 3.511580  | -1.170603 | 0.695494  |
| Mg13 | 2.709472  | -1.259334 | -2.349259 |

@mg13-isomer49 bp86/6-31G(d) Etot=-2601.149921 Eb=-11.76

|     |          |           |           |
|-----|----------|-----------|-----------|
| Mg1 | 4.794833 | -1.632796 | 0.000000  |
| Mg2 | 2.798883 | 0.581014  | -0.000091 |
| Mg3 | 2.006862 | -2.743446 | 0.000050  |
| Mg4 | 2.988517 | 3.647610  | 0.000021  |



|      |           |           |           |
|------|-----------|-----------|-----------|
| Mg5  | 0.197574  | -0.636827 | 1.525238  |
| Mg6  | 0.197537  | -0.636821 | -1.525172 |
| Mg7  | 0.069799  | 2.138601  | 0.000072  |
| Mg8  | -1.172509 | -2.995734 | -0.000034 |
| Mg9  | -1.555162 | 1.500972  | 2.659839  |
| Mg10 | -1.555038 | 1.501041  | -2.659795 |
| Mg11 | -2.914279 | -1.117205 | 1.557328  |
| Mg12 | -2.914278 | -1.117173 | -1.557431 |
| Mg13 | -2.942738 | 1.510765  | -0.000025 |

@mg13-isomer50 bp86/6-31G(d) Etot=-2601.149777 Eb=-11.76

|      |           |           |           |
|------|-----------|-----------|-----------|
| Mg1  | -1.110603 | -2.020974 | -1.887371 |
| Mg2  | -3.763121 | -1.490897 | -0.575984 |
| Mg3  | -1.261000 | -1.995264 | 1.101870  |
| Mg4  | 1.520093  | -1.970303 | -0.232480 |
| Mg5  | 4.567132  | -2.374596 | 0.013677  |
| Mg6  | 3.658241  | 0.595409  | -0.015182 |
| Mg7  | -2.452019 | 0.920170  | -1.969782 |
| Mg8  | 0.676055  | 0.590201  | -1.728155 |
| Mg9  | -1.284082 | -0.127320 | 3.508071  |
| Mg10 | -2.620841 | 0.983873  | 0.994446  |
| Mg11 | 0.585357  | 0.662700  | 1.269906  |
| Mg12 | 2.316929  | 3.288976  | -0.069966 |
| Mg13 | -0.832142 | 2.938026  | -0.409049 |

@mg13-isomer51 bp86/6-31G(d) Etot=-2601.149726 Eb=-11.76

|      |           |           |           |
|------|-----------|-----------|-----------|
| Mg1  | -1.484905 | 2.704268  | 0.640431  |
| Mg2  | 1.495023  | 2.553329  | 2.011303  |
| Mg3  | 3.062152  | -0.000010 | 1.307508  |
| Mg4  | 1.166639  | 1.721750  | -0.795392 |
| Mg5  | 3.692393  | 0.000061  | -1.702157 |
| Mg6  | -4.113184 | 1.543716  | -0.156321 |
| Mg7  | -0.221632 | -0.000038 | 1.570583  |
| Mg8  | 1.495081  | -2.553406 | 2.011187  |
| Mg9  | 0.936049  | 0.000074  | -3.244711 |
| Mg10 | -1.596229 | 0.000006  | -1.330999 |
| Mg11 | 1.166651  | -1.721715 | -0.795471 |
| Mg12 | -1.484872 | -2.704309 | 0.640356  |
| Mg13 | -4.113165 | -1.543725 | -0.156317 |

@mg13-isomer52 bp86/6-31G(d) Etot=-2601.149715 Eb=-11.75

|      |           |           |           |
|------|-----------|-----------|-----------|
| Mg1  | 0.558134  | -1.820549 | -1.514751 |
| Mg2  | 0.558121  | -1.820434 | 1.514802  |
| Mg3  | -2.094774 | -0.838346 | 0.000032  |
| Mg4  | -3.673433 | 1.427398  | 1.517549  |
| Mg5  | -1.504253 | -3.741768 | 0.000096  |
| Mg6  | 2.054822  | 0.894507  | 1.748224  |
| Mg7  | -0.874475 | 0.642032  | 2.652440  |
| Mg8  | -0.411626 | 1.876222  | -0.000028 |
| Mg9  | 2.054782  | 0.894441  | -1.748257 |
| Mg10 | -3.673480 | 1.427320  | -1.517621 |
| Mg11 | -0.874518 | 0.641887  | -2.652434 |
| Mg12 | 4.523559  | 1.673802  | -0.000068 |
| Mg13 | 3.357142  | -1.256512 | 0.000015  |

@mg13-isomer53 bp86/6-31G(d) Etot=-2601.149694 Eb=-11.75

|     |           |           |           |
|-----|-----------|-----------|-----------|
| Mg1 | -2.334795 | 0.000152  | 2.416615  |
| Mg2 | -2.238992 | 1.984397  | -0.000160 |
| Mg3 | -4.391258 | -0.000087 | 0.000003  |
| Mg4 | 0.344041  | 1.491136  | 1.575956  |
| Mg5 | 3.299077  | -0.000121 | -1.498385 |
| Mg6 | 0.344152  | -1.490784 | 1.576203  |
| Mg7 | 2.781867  | 2.612719  | -0.000307 |
| Mg8 | -2.238793 | -1.984411 | 0.000128  |

|      |           |           |           |
|------|-----------|-----------|-----------|
| Mg9  | 0.344106  | 1.490698  | -1.576179 |
| Mg10 | 2.782226  | -2.612556 | 0.000338  |
| Mg11 | 3.298947  | 0.000313  | 1.498409  |
| Mg12 | 0.344233  | -1.491201 | -1.575942 |
| Mg13 | -2.334810 | -0.000254 | -2.416680 |

@mg13-isomer54 bp86/6-31G(d) Etot=-2601.149558 Eb=-11.75

|      |           |           |           |
|------|-----------|-----------|-----------|
| Mg1  | -3.361168 | 0.794153  | -1.694531 |
| Mg2  | -4.709585 | 0.345302  | 1.083596  |
| Mg3  | -1.806198 | 1.300925  | 0.936687  |
| Mg4  | -0.161349 | 2.538470  | -1.368657 |
| Mg5  | -0.323264 | -0.369557 | -1.678217 |
| Mg6  | -2.770192 | -1.758676 | 0.216954  |
| Mg7  | 1.198392  | 1.642144  | 1.346330  |
| Mg8  | 4.295327  | 1.258952  | 1.292572  |
| Mg9  | 2.594396  | 1.039072  | -1.352124 |
| Mg10 | 2.319572  | -1.871636 | -2.089032 |
| Mg11 | -0.154274 | -0.929431 | 2.361306  |
| Mg12 | 0.212888  | -2.782638 | 0.012038  |
| Mg13 | 2.665454  | -1.207082 | 0.933077  |

@mg13-isomer55 bp86/6-31G(d) Etot=-2601.149458 Eb=-11.74

|      |           |           |           |
|------|-----------|-----------|-----------|
| Mg1  | 2.448870  | -2.303274 | -0.423657 |
| Mg2  | 4.312090  | 0.102703  | -0.166821 |
| Mg3  | 1.315165  | 0.312922  | 1.297203  |
| Mg4  | -0.368960 | -2.397852 | 1.007059  |
| Mg5  | 1.248215  | 0.369524  | -1.684185 |
| Mg6  | -0.354035 | -2.288108 | -1.950441 |
| Mg7  | 2.868062  | 2.768194  | -0.038669 |
| Mg8  | -0.478361 | -0.654584 | 3.535634  |
| Mg9  | -3.099487 | -2.065220 | -0.540197 |
| Mg10 | -0.293114 | 2.592881  | -0.166254 |
| Mg11 | -2.110591 | 0.361964  | 1.169180  |
| Mg12 | -1.980294 | 0.476357  | -1.814041 |
| Mg13 | -3.507559 | 2.724494  | -0.224810 |

@mg13-isomer56 bp86/6-31G(d) Etot=-2601.149278 Eb=-11.73

|      |           |           |           |
|------|-----------|-----------|-----------|
| Mg1  | -1.455558 | 1.078732  | -1.670118 |
| Mg2  | -1.943460 | -1.808499 | -2.446798 |
| Mg3  | -0.252691 | 3.624906  | -0.559196 |
| Mg4  | -3.499851 | -0.653663 | 0.051675  |
| Mg5  | -2.485992 | 2.056774  | 0.979507  |
| Mg6  | 0.919171  | -1.114020 | -1.369973 |
| Mg7  | 2.799250  | 3.262504  | -0.098199 |
| Mg8  | -1.295249 | -2.735785 | 0.344872  |
| Mg9  | 0.420552  | 1.043738  | 0.883902  |
| Mg10 | -1.631159 | -0.605083 | 2.567761  |
| Mg11 | 3.426801  | 0.333518  | -0.066156 |
| Mg12 | 1.302420  | -1.731645 | 1.586735  |
| Mg13 | 3.695767  | -2.751478 | -0.204011 |

@mg13-isomer57 bp86/6-31G(d) Etot=-2601.149213 Eb=-11.73

|      |           |           |           |
|------|-----------|-----------|-----------|
| Mg1  | -1.209036 | -0.433626 | -1.228455 |
| Mg2  | -4.482658 | 0.081938  | -1.137940 |
| Mg3  | -2.521514 | 2.400610  | -0.851710 |
| Mg4  | 1.598976  | -0.309825 | -2.525714 |
| Mg5  | 0.581954  | 2.227595  | -1.102793 |
| Mg6  | -0.922072 | 1.177465  | 1.428311  |
| Mg7  | -3.920194 | -2.281109 | 0.676319  |
| Mg8  | 4.248631  | -2.000878 | -1.221568 |
| Mg9  | 1.283249  | -1.984073 | -0.061063 |
| Mg10 | 1.806581  | 2.665716  | 1.724553  |
| Mg11 | -1.079329 | -1.861831 | 1.742738  |
| Mg12 | 3.081595  | 0.628302  | 0.016885  |

|                                                          |           |           |           |
|----------------------------------------------------------|-----------|-----------|-----------|
| Mg13                                                     | 1.533814  | -0.310284 | 2.540437  |
| @mg13-isomer58 bp86/6-31G(d) Etot=-2601.149169 Eb=-11.73 |           |           |           |
| Mg1                                                      | 2.141060  | -0.075204 | 1.785036  |
| Mg2                                                      | 3.421467  | -2.095226 | -0.012118 |
| Mg3                                                      | -2.238898 | -1.434611 | 2.382523  |
| Mg4                                                      | 4.093309  | 1.287453  | -0.118694 |
| Mg5                                                      | 0.331931  | -2.354834 | 0.654707  |
| Mg6                                                      | -0.665831 | 0.821794  | 1.090337  |
| Mg7                                                      | 1.414438  | 0.138020  | -1.212712 |
| Mg8                                                      | 1.511348  | 2.948700  | 0.186885  |
| Mg9                                                      | -1.902069 | 3.228364  | -0.241516 |
| Mg10                                                     | -3.663961 | 0.770193  | 0.406302  |
| Mg11                                                     | -1.572751 | 0.742872  | -1.984826 |
| Mg12                                                     | -0.263963 | -2.010956 | -2.460343 |
| Mg13                                                     | -2.606080 | -1.966564 | -0.475583 |
| @mg13-isomer59 bp86/6-31G(d) Etot=-2601.149144 Eb=-11.73 |           |           |           |
| Mg1                                                      | -4.508751 | -1.462558 | -0.026307 |
| Mg2                                                      | 1.947003  | 2.209311  | -1.007742 |
| Mg3                                                      | -1.565719 | -1.488505 | -1.108806 |
| Mg4                                                      | -0.785120 | 1.308865  | -2.252374 |
| Mg5                                                      | 3.604743  | -2.884636 | -0.252717 |
| Mg6                                                      | 0.780437  | -2.614634 | 0.755250  |
| Mg7                                                      | -2.130101 | -1.568320 | 1.860076  |
| Mg8                                                      | 0.012271  | 0.393502  | 0.899086  |
| Mg9                                                      | 3.240052  | -0.009037 | 0.651672  |
| Mg10                                                     | -3.065732 | 1.199708  | 0.144111  |
| Mg11                                                     | -0.879884 | 3.290996  | 0.202651  |
| Mg12                                                     | 1.441920  | -0.846004 | -1.846925 |
| Mg13                                                     | 1.908881  | 2.471312  | 1.982026  |
| @mg13-isomer60 bp86/6-31G(d) Etot=-2601.148979 Eb=-11.72 |           |           |           |
| Mg1                                                      | -1.476731 | -1.959929 | 1.973751  |
| Mg2                                                      | 4.288876  | -0.875202 | 0.398075  |
| Mg3                                                      | -2.720142 | -1.878528 | -0.826339 |
| Mg4                                                      | 1.697108  | -1.639754 | 1.783626  |
| Mg5                                                      | 0.298861  | -2.876347 | -0.507497 |
| Mg6                                                      | -0.229634 | 0.766843  | 1.500639  |
| Mg7                                                      | -3.313776 | 0.361124  | 1.098884  |
| Mg8                                                      | 3.684148  | 2.095657  | -0.176209 |
| Mg9                                                      | -1.524360 | 1.037363  | -1.336978 |
| Mg10                                                     | -0.515684 | -1.289152 | -3.018587 |
| Mg11                                                     | 0.758252  | 2.974335  | -0.354974 |
| Mg12                                                     | -2.485556 | 3.316692  | 0.443252  |
| Mg13                                                     | 1.538638  | -0.033101 | -0.977643 |
| @mg13-isomer61 bp86/6-31G(d) Etot=-2601.148896 Eb=-11.72 |           |           |           |
| Mg1                                                      | 0.804780  | -1.404472 | 2.515607  |
| Mg2                                                      | 2.440731  | -2.229701 | 0.000074  |
| Mg3                                                      | -3.776204 | -1.769802 | 0.000130  |
| Mg4                                                      | 2.248196  | 3.026854  | -0.000044 |
| Mg5                                                      | 0.648076  | 0.490327  | -0.000297 |
| Mg6                                                      | -1.238868 | 2.955682  | -0.000111 |
| Mg7                                                      | -3.991241 | 1.701640  | -0.000031 |
| Mg8                                                      | 3.280839  | 0.449216  | -1.508869 |
| Mg9                                                      | 3.280413  | 0.449401  | 1.509171  |
| Mg10                                                     | -0.732935 | -2.487924 | 0.000032  |
| Mg11                                                     | -1.884260 | 0.111806  | 1.600173  |
| Mg12                                                     | -1.884468 | 0.111603  | -1.600224 |
| Mg13                                                     | 0.804942  | -1.404630 | -2.515609 |
| @mg13-isomer62 bp86/6-31G(d) Etot=-2601.148658 Eb=-11.70 |           |           |           |
| Mg1                                                      | -0.877961 | 1.737228  | 2.788787  |

|      |           |           |           |
|------|-----------|-----------|-----------|
| Mg2  | -3.227653 | 1.778181  | 0.573741  |
| Mg3  | -0.000227 | 2.128101  | 0.000111  |
| Mg4  | -3.904071 | -1.142192 | -0.278904 |
| Mg5  | -1.021269 | -0.823024 | 1.258746  |
| Mg6  | -1.850432 | 0.329290  | -1.867365 |
| Mg7  | 1.850202  | 0.329512  | 1.867459  |
| Mg8  | 0.877262  | 1.737682  | -2.788779 |
| Mg9  | 3.227318  | 1.778739  | -0.573734 |
| Mg10 | -1.510564 | -2.944673 | -0.688722 |
| Mg11 | 1.021548  | -0.822374 | -1.258419 |
| Mg12 | 1.511484  | -2.945017 | 0.687963  |
| Mg13 | 3.904362  | -1.141453 | 0.279117  |

@mg13-isomer63 bp86/6-31G(d) Etot=-2601.148405 Eb=-11.69

|      |           |           |           |
|------|-----------|-----------|-----------|
| Mg1  | -3.203123 | -1.655263 | 0.672480  |
| Mg2  | -0.466974 | -3.149926 | 1.280023  |
| Mg3  | -0.303413 | -0.258722 | 1.868177  |
| Mg4  | -0.467040 | 2.683446  | 2.087992  |
| Mg5  | -3.203117 | 1.410095  | 1.097042  |
| Mg6  | 2.440778  | -1.840865 | 0.747842  |
| Mg7  | -0.303444 | -1.488415 | -1.158058 |
| Mg8  | -3.202821 | 0.245105  | -1.769995 |
| Mg9  | 2.440659  | 1.568275  | 1.219996  |
| Mg10 | 4.597452  | -0.000003 | 0.000393  |
| Mg11 | -0.303492 | 1.747209  | -0.709925 |
| Mg12 | 2.441073  | 0.272562  | -1.968028 |
| Mg13 | -0.466538 | 0.466503  | -3.367939 |

@mg13-isomer64 bp86/6-31G(d) Etot=-2601.148371 Eb=-11.69

|      |           |           |           |
|------|-----------|-----------|-----------|
| Mg1  | 0.672824  | 2.563592  | 0.381769  |
| Mg2  | -1.111009 | 2.367725  | -2.240998 |
| Mg3  | -2.417876 | 1.960670  | 0.559379  |
| Mg4  | 0.028954  | -0.122611 | -1.042293 |
| Mg5  | 3.660125  | 2.038787  | -0.168705 |
| Mg6  | 4.325213  | -1.031527 | -0.531330 |
| Mg7  | -3.104829 | -0.020120 | -1.632356 |
| Mg8  | 2.113529  | -0.128248 | 1.362778  |
| Mg9  | -0.811905 | 0.637249  | 2.679252  |
| Mg10 | -3.167251 | -0.923163 | 1.279087  |
| Mg11 | 1.784259  | -2.599182 | -0.934396 |
| Mg12 | -1.677248 | -2.669702 | -1.144138 |
| Mg13 | -0.294785 | -2.073470 | 1.431950  |

@mg13-isomer65 bp86/6-31G(d) Etot=-2601.148117 Eb=-11.68

|      |           |           |           |
|------|-----------|-----------|-----------|
| Mg1  | 1.961255  | -2.621218 | -0.470943 |
| Mg2  | -3.382765 | -1.115401 | -0.446040 |
| Mg3  | -0.904216 | -2.335849 | 0.916369  |
| Mg4  | -0.953340 | -2.209756 | -1.996126 |
| Mg5  | 4.141932  | -0.425792 | -0.244000 |
| Mg6  | 1.306542  | 0.048035  | -1.750616 |
| Mg7  | -0.424041 | -0.817615 | 3.492667  |
| Mg8  | -1.621308 | 0.961680  | -1.737463 |
| Mg9  | 1.450534  | 0.088942  | 1.269550  |
| Mg10 | -3.967975 | 2.224719  | -0.113793 |
| Mg11 | 3.507777  | 2.561078  | 0.042185  |
| Mg12 | -1.577413 | 0.935444  | 1.283742  |
| Mg13 | 0.463017  | 2.705734  | -0.245532 |

@mg13-isomer66 bp86/6-31G(d) Etot=-2601.148025 Eb=-11.67

|     |           |           |           |
|-----|-----------|-----------|-----------|
| Mg1 | -0.377456 | 0.914633  | 1.133644  |
| Mg2 | -1.340239 | -1.902335 | 1.464386  |
| Mg3 | -3.856102 | -2.581001 | -0.230978 |
| Mg4 | -2.241978 | 3.238981  | 0.069144  |
| Mg5 | -3.478229 | 0.498445  | 0.099719  |

|      |           |           |           |
|------|-----------|-----------|-----------|
| Mg6  | 0.971690  | 3.636611  | 0.670003  |
| Mg7  | 1.139193  | -2.741080 | -0.137946 |
| Mg8  | 0.192869  | 1.789092  | -1.688816 |
| Mg9  | 1.844914  | -0.681441 | -2.342814 |
| Mg10 | 2.684418  | 1.283066  | 0.115089  |
| Mg11 | 3.869458  | -1.464793 | 0.028098  |
| Mg12 | -1.150963 | -1.047555 | -1.489104 |
| Mg13 | 1.742426  | -0.942623 | 2.309576  |

@mg13-isomer67 bp86/6-31G(d) Etot=-2601.147751 Eb=-11.66

|      |           |           |           |
|------|-----------|-----------|-----------|
| Mg1  | -3.615741 | -2.284322 | -1.284464 |
| Mg2  | -2.074365 | 0.413174  | -1.575898 |
| Mg3  | 1.908345  | -3.196425 | -0.359229 |
| Mg4  | -1.119130 | -2.061391 | 0.475647  |
| Mg5  | 0.932435  | -0.355979 | -1.045477 |
| Mg6  | -3.616186 | -0.137280 | 0.936545  |
| Mg7  | 3.099983  | 1.676674  | -1.766221 |
| Mg8  | 0.160337  | 2.624757  | -0.704887 |
| Mg9  | -2.743939 | 2.825395  | 0.328706  |
| Mg10 | 3.856687  | -0.824293 | -0.079933 |
| Mg11 | -0.626850 | 0.938382  | 1.909914  |
| Mg12 | 1.443425  | -1.275994 | 2.016681  |
| Mg13 | 2.394999  | 1.657304  | 1.148615  |

@mg13-isomer68 bp86/6-31G(d) Etot=-2601.147717 Eb=-11.66

|      |           |           |           |
|------|-----------|-----------|-----------|
| Mg1  | 0.723866  | 3.841614  | 0.000139  |
| Mg2  | 2.496403  | 1.500488  | 0.000034  |
| Mg3  | 4.016649  | -1.117031 | -0.000036 |
| Mg4  | -0.345061 | 1.298949  | 1.491660  |
| Mg5  | -2.473060 | 3.181350  | 0.000013  |
| Mg6  | 1.826343  | -0.690522 | -2.295562 |
| Mg7  | 1.826364  | -0.690584 | 2.295550  |
| Mg8  | 1.424498  | -2.736444 | -0.000020 |
| Mg9  | -3.699586 | -2.806844 | -0.000039 |
| Mg10 | -1.098787 | -1.684876 | 1.520835  |
| Mg11 | -0.344999 | 1.299118  | -1.491783 |
| Mg12 | -1.098775 | -1.684717 | -1.520807 |
| Mg13 | -3.253856 | 0.289501  | 0.000015  |

@mg13-isomer69 bp86/6-31G(d) Etot=-2601.147425 Eb=-11.64

|      |           |           |           |
|------|-----------|-----------|-----------|
| Mg1  | 2.920642  | -2.988575 | -0.084585 |
| Mg2  | 0.321799  | -1.805816 | -1.299556 |
| Mg3  | 3.381225  | -0.017741 | -1.166665 |
| Mg4  | 2.882992  | 2.548197  | 0.569478  |
| Mg5  | -2.208999 | 2.585130  | 0.241604  |
| Mg6  | -1.172521 | -0.228947 | 1.183426  |
| Mg7  | 0.361019  | 4.299754  | 0.264763  |
| Mg8  | 1.892512  | -0.340641 | 1.364772  |
| Mg9  | -2.586491 | -2.636437 | -0.239158 |
| Mg10 | 0.525607  | 1.417693  | -0.903827 |
| Mg11 | -2.202905 | 0.190890  | -1.720651 |
| Mg12 | 0.116022  | -3.077630 | 1.346264  |
| Mg13 | -4.230904 | 0.054123  | 0.444135  |

@mg13-isomer70 bp86/6-31G(d) Etot=-2601.147275 Eb=-11.64

|     |           |           |           |
|-----|-----------|-----------|-----------|
| Mg1 | 1.162131  | 0.640536  | 2.320862  |
| Mg2 | 1.333593  | -0.294155 | -1.041589 |
| Mg3 | 0.789071  | -2.361555 | 1.391805  |
| Mg4 | -1.333552 | -0.294179 | 1.041472  |
| Mg5 | -0.789085 | -2.361505 | -1.391878 |
| Mg6 | -3.174936 | 1.954761  | -0.284080 |
| Mg7 | 3.174900  | 1.954738  | 0.284168  |
| Mg8 | -4.291830 | -0.124889 | 1.749985  |
| Mg9 | 3.640692  | -1.024577 | 1.154160  |

|      |           |           |           |
|------|-----------|-----------|-----------|
| Mg10 | -1.162155 | 0.640618  | -2.320816 |
| Mg11 | -3.640730 | -1.024516 | -1.154204 |
| Mg12 | -0.000002 | 2.419511  | 0.000039  |
| Mg13 | 4.291905  | -0.124787 | -1.749925 |

@mg13-isomer71 bp86/6-31G(d) Etot=-2601.147246 Eb=-11.64

|      |           |           |           |
|------|-----------|-----------|-----------|
| Mg1  | 1.592331  | 2.672247  | 0.000289  |
| Mg2  | 0.000023  | 1.700912  | -2.536696 |
| Mg3  | -0.000112 | -0.145635 | -0.000215 |
| Mg4  | 2.696665  | 0.183075  | -1.513876 |
| Mg5  | 2.696444  | 0.182606  | 1.513903  |
| Mg6  | -2.696726 | 0.183151  | -1.513940 |
| Mg7  | -0.000070 | 1.700310  | 2.536978  |
| Mg8  | -1.604423 | -2.744592 | 0.000060  |
| Mg9  | -2.696682 | 0.182717  | 1.513859  |
| Mg10 | -1.592285 | 2.672221  | 0.000228  |
| Mg11 | -4.442695 | -1.921460 | -0.000303 |
| Mg12 | 4.442955  | -1.921261 | -0.000237 |
| Mg13 | 1.604573  | -2.744290 | -0.000050 |

@mg13-isomer72 bp86/6-31G(d) Etot=-2601.146955 Eb=-11.62

|      |           |           |           |
|------|-----------|-----------|-----------|
| Mg1  | -0.670662 | 4.170934  | -0.000064 |
| Mg2  | 1.073377  | 1.541366  | 0.000132  |
| Mg3  | -1.641590 | 1.500250  | 1.607046  |
| Mg4  | -1.641354 | 1.500188  | -1.607037 |
| Mg5  | 0.878676  | 0.000057  | -2.614106 |
| Mg6  | 3.891303  | 0.000151  | -1.530433 |
| Mg7  | -3.779883 | -0.000108 | -0.000162 |
| Mg8  | -1.641437 | -1.500273 | 1.606909  |
| Mg9  | -1.641267 | -1.500334 | -1.607064 |
| Mg10 | 3.891168  | 0.000156  | 1.530513  |
| Mg11 | 0.878445  | -0.000045 | 2.614219  |
| Mg12 | 1.073576  | -1.541343 | 0.000026  |
| Mg13 | -0.670352 | -4.170998 | 0.000020  |

@mg13-isomer73 bp86/6-31G(d) Etot=-2601.146776 Eb=-11.61

|      |           |           |           |
|------|-----------|-----------|-----------|
| Mg1  | 1.610701  | -1.135154 | 2.183340  |
| Mg2  | -0.373481 | 1.289643  | 1.951553  |
| Mg3  | 2.630162  | 1.525845  | 0.910203  |
| Mg4  | 3.581042  | -1.182123 | -0.241453 |
| Mg5  | -1.281365 | -1.640392 | 1.236912  |
| Mg6  | -2.635517 | 0.718593  | -0.518976 |
| Mg7  | 0.304325  | 2.842580  | -0.722541 |
| Mg8  | -2.569657 | 3.609480  | 0.172858  |
| Mg9  | 1.244575  | -3.159670 | -0.227658 |
| Mg10 | -4.225936 | -1.793079 | -0.070629 |
| Mg11 | 2.832883  | 1.295699  | -2.058291 |
| Mg12 | -1.628457 | -2.163273 | -1.736897 |
| Mg13 | 0.510725  | -0.208149 | -0.878423 |

@mg13-isomer74 bp86/6-31G(d) Etot=-2601.146708 Eb=-11.61

|      |           |           |           |
|------|-----------|-----------|-----------|
| Mg1  | 0.949038  | -0.414614 | 2.668812  |
| Mg2  | -1.888327 | -0.522436 | 1.477467  |
| Mg3  | 2.854030  | -2.411680 | 1.118515  |
| Mg4  | 0.038485  | 1.836630  | 0.713772  |
| Mg5  | 3.017731  | 0.530996  | 0.515412  |
| Mg6  | -3.091205 | 2.521194  | 0.485224  |
| Mg7  | 2.531840  | 3.399021  | -0.303072 |
| Mg8  | 0.269378  | -1.786718 | -0.354335 |
| Mg9  | -4.492866 | -0.224950 | -0.307477 |
| Mg10 | 2.938359  | -1.628119 | -1.818406 |
| Mg11 | -2.696219 | -2.693993 | -0.660593 |
| Mg12 | 1.284619  | 1.062627  | -2.012779 |
| Mg13 | -1.714863 | 0.332042  | -1.522541 |

@mg13-isomer75 bp86/6-31G(d) Etot=-2601.146701 Eb=-11.61

|      |           |           |           |
|------|-----------|-----------|-----------|
| Mg1  | -1.099499 | -1.347196 | 1.064041  |
| Mg2  | -1.703387 | -2.070496 | -1.746897 |
| Mg3  | -0.808356 | 1.905942  | 1.398008  |
| Mg4  | 4.158876  | -2.120704 | 0.050422  |
| Mg5  | 1.308397  | -2.276165 | -0.875115 |
| Mg6  | -0.008907 | -0.079384 | 3.611924  |
| Mg7  | -3.191656 | 0.792549  | -0.406133 |
| Mg8  | 1.742547  | 2.934176  | -0.333746 |
| Mg9  | 0.035582  | 0.524339  | -1.456501 |
| Mg10 | -4.173240 | -2.063777 | 0.009175  |
| Mg11 | -1.487260 | 3.193672  | -1.192324 |
| Mg12 | 3.306504  | 0.504368  | -1.349175 |
| Mg13 | 1.920399  | 0.102679  | 1.226323  |

@mg13-isomer76 bp86/6-31G(d) Etot=-2601.146604 Eb=-11.60

|      |           |           |           |
|------|-----------|-----------|-----------|
| Mg1  | 0.357062  | 0.661831  | 1.509962  |
| Mg2  | 4.232250  | -2.092705 | -0.891221 |
| Mg3  | -0.769156 | 1.646554  | -1.493918 |
| Mg4  | 1.886154  | 0.002248  | -1.651520 |
| Mg5  | -2.801750 | 0.773280  | 0.683441  |
| Mg6  | 1.882333  | 2.849610  | -0.250121 |
| Mg7  | -1.205248 | -1.857653 | 2.125640  |
| Mg8  | 1.673585  | -2.019745 | 0.834041  |
| Mg9  | -3.679200 | -2.164122 | 0.216290  |
| Mg10 | -1.145755 | 3.274068  | 1.165569  |
| Mg11 | -3.320510 | -0.149507 | -2.153758 |
| Mg12 | 3.693834  | 0.528490  | 0.812509  |
| Mg13 | -0.803598 | -1.452350 | -0.906915 |

@mg13-isomer77 bp86/6-31G(d) Etot=-2601.146483 Eb=-11.60

|      |           |           |           |
|------|-----------|-----------|-----------|
| Mg1  | 1.858145  | 0.210699  | -1.407809 |
| Mg2  | 1.614533  | -0.285006 | 1.838100  |
| Mg3  | -3.920719 | 0.133922  | 0.723475  |
| Mg4  | 0.923613  | 2.660707  | 0.793609  |
| Mg5  | -2.625759 | -2.352200 | -0.562965 |
| Mg6  | -0.633145 | -1.124610 | -2.639370 |
| Mg7  | 3.788547  | 1.618023  | 0.466488  |
| Mg8  | 3.688171  | -1.754389 | -0.049629 |
| Mg9  | 0.730505  | -2.565242 | -0.077569 |
| Mg10 | -0.706736 | 1.999826  | -2.077605 |
| Mg11 | -0.890702 | 0.268913  | 0.258999  |
| Mg12 | -2.485138 | 2.875868  | 0.432959  |
| Mg13 | -1.341314 | -1.686512 | 2.301316  |

@mg13-isomer78 bp86/6-31G(d) Etot=-2601.146335 Eb=-11.59

|      |           |           |           |
|------|-----------|-----------|-----------|
| Mg1  | -1.780627 | -1.255376 | -1.537325 |
| Mg2  | 1.256125  | -1.481257 | -2.539190 |
| Mg3  | 3.074838  | -1.579946 | -0.000025 |
| Mg4  | -3.024711 | 1.301662  | 0.000009  |
| Mg5  | -1.797436 | 4.018156  | -0.000017 |
| Mg6  | -1.780615 | -1.255390 | 1.537333  |
| Mg7  | 2.755507  | 1.113609  | -1.499531 |
| Mg8  | 1.256140  | -1.481373 | 2.539132  |
| Mg9  | 2.755470  | 1.113568  | 1.499601  |
| Mg10 | 0.421204  | -2.973954 | -0.000035 |
| Mg11 | -4.520549 | -1.368254 | 0.000016  |
| Mg12 | 0.166484  | 0.465379  | -0.000017 |
| Mg13 | 1.218170  | 3.383176  | 0.000049  |

@mg13-isomer79 bp86/6-31G(d) Etot=-2601.146278 Eb=-11.59

|     |          |          |           |
|-----|----------|----------|-----------|
| Mg1 | 4.275584 | 0.166353 | -0.349794 |
| Mg2 | 2.087034 | 2.395435 | 0.232032  |

|      |           |           |           |
|------|-----------|-----------|-----------|
| Mg3  | 2.199070  | -0.664636 | 1.652331  |
| Mg4  | -0.621340 | 3.990589  | 0.776256  |
| Mg5  | -0.546503 | 0.676565  | 1.026046  |
| Mg6  | 2.959911  | -2.861266 | -0.249526 |
| Mg7  | 1.290347  | -0.306976 | -1.243897 |
| Mg8  | -0.425561 | 2.370309  | -1.648616 |
| Mg9  | -0.084829 | -2.603071 | 0.467245  |
| Mg10 | -3.079071 | 2.031749  | -0.061044 |
| Mg11 | -3.282212 | -0.947487 | 1.153579  |
| Mg12 | -1.957677 | -0.649271 | -1.444454 |
| Mg13 | -2.814752 | -3.598293 | -0.310159 |

@mg13-isomer80 bp86/6-31G(d) Etot=-2601.146159 Eb=-11.58

|      |           |           |           |
|------|-----------|-----------|-----------|
| Mg1  | -0.074661 | 0.215063  | 1.542941  |
| Mg2  | 4.487471  | -0.264599 | -0.000111 |
| Mg3  | -3.893599 | -0.936869 | 0.000108  |
| Mg4  | -2.427108 | -1.322617 | 2.634267  |
| Mg5  | -2.928706 | 1.531177  | 1.557517  |
| Mg6  | -0.074781 | 0.215053  | -1.543053 |
| Mg7  | 7.655599  | -0.240457 | 0.000138  |
| Mg8  | 1.908969  | -1.753196 | -0.000136 |
| Mg9  | -0.620352 | 2.767340  | -0.000038 |
| Mg10 | -2.928829 | 1.531143  | -1.557409 |
| Mg11 | 2.414750  | 1.872843  | -0.000085 |
| Mg12 | -2.427306 | -1.322657 | -2.634156 |
| Mg13 | -1.091447 | -2.292224 | 0.000016  |

@mg13-isomer81 bp86/6-31G(d) Etot=-2601.146087 Eb=-11.58

|      |           |           |           |
|------|-----------|-----------|-----------|
| Mg1  | 1.333936  | -3.050514 | 0.378002  |
| Mg2  | -3.852073 | 2.355650  | -0.401268 |
| Mg3  | -0.979540 | -2.032873 | -1.514921 |
| Mg4  | 3.050211  | -0.591174 | 1.012170  |
| Mg5  | -0.357280 | -0.478690 | 0.980234  |
| Mg6  | 1.739283  | -0.659055 | -1.808741 |
| Mg7  | 4.285423  | 1.161553  | -1.255519 |
| Mg8  | 1.115361  | 1.248463  | 2.845657  |
| Mg9  | 1.563174  | 1.994758  | -0.212245 |
| Mg10 | -0.987436 | 1.085479  | -1.829065 |
| Mg11 | -2.142328 | -2.959826 | 1.203219  |
| Mg12 | -3.565110 | -0.631588 | -0.385331 |
| Mg13 | -1.203619 | 2.557818  | 0.987809  |

@mg13-isomer82 bp86/6-31G(d) Etot=-2601.145837 Eb=-11.57

|      |           |           |           |
|------|-----------|-----------|-----------|
| Mg1  | 0.022737  | 2.147804  | 0.751239  |
| Mg2  | 2.182549  | 0.062060  | 1.842171  |
| Mg3  | -1.405062 | 0.804830  | -1.892353 |
| Mg4  | -3.012321 | 0.909836  | 0.812945  |
| Mg5  | -0.464585 | -1.228405 | 0.846998  |
| Mg6  | -0.203949 | -2.114274 | -2.112020 |
| Mg7  | -3.058291 | -1.774478 | -0.823798 |
| Mg8  | 3.246319  | 2.482223  | 0.286775  |
| Mg9  | 4.441120  | -0.519434 | -0.093022 |
| Mg10 | 1.558248  | 0.240113  | -1.212799 |
| Mg11 | -2.410209 | 3.485837  | -0.655287 |
| Mg12 | -3.123787 | -1.784445 | 2.246515  |
| Mg13 | 2.227231  | -2.711666 | 0.002635  |

@mg13-isomer83 bp86/6-31G(d) Etot=-2601.145818 Eb=-11.57

|     |           |           |           |
|-----|-----------|-----------|-----------|
| Mg1 | 1.658548  | 1.107505  | -0.782651 |
| Mg2 | -1.662877 | 1.054482  | 2.124496  |
| Mg3 | 1.348988  | 1.515841  | 2.207666  |
| Mg4 | -0.383671 | 2.443908  | -2.594143 |
| Mg5 | 4.589543  | -2.484120 | -0.379936 |
| Mg6 | 3.759232  | -0.323924 | 1.513871  |



|      |           |           |           |
|------|-----------|-----------|-----------|
| Mg7  | -2.641950 | 1.556812  | -0.735986 |
| Mg8  | -0.328960 | 3.256573  | 0.360529  |
| Mg9  | -2.667394 | -1.282124 | 0.389476  |
| Mg10 | 1.904463  | -1.957251 | -1.615232 |
| Mg11 | -5.155041 | -3.266617 | 0.490463  |
| Mg12 | 0.316324  | -1.057991 | 0.955196  |
| Mg13 | -0.737203 | -0.563095 | -1.933749 |

@mg13-isomer84 bp86/6-31G(d) Etot=-2601.145594 Eb=-11.56

|      |           |           |           |
|------|-----------|-----------|-----------|
| Mg1  | -1.374191 | -1.815105 | 1.886849  |
| Mg2  | 0.609825  | 0.519473  | 1.715633  |
| Mg3  | 3.660985  | 0.009631  | 0.420076  |
| Mg4  | 0.965597  | -1.974109 | -0.190638 |
| Mg5  | -0.549813 | 3.133190  | 0.437497  |
| Mg6  | -2.070982 | -1.431525 | -0.963594 |
| Mg7  | -2.540472 | 1.053710  | 1.087860  |
| Mg8  | -4.405978 | -1.354456 | 0.906882  |
| Mg9  | 2.684835  | 2.944219  | 0.698926  |
| Mg10 | 3.873604  | -3.033963 | 0.213826  |
| Mg11 | -1.883761 | 1.616252  | -1.852476 |
| Mg12 | -0.143750 | -0.780609 | -3.128458 |
| Mg13 | 1.174100  | 1.113291  | -1.232381 |

@mg13-isomer85 bp86/6-31G(d) Etot=-2601.145404 Eb=-11.55

|      |           |           |           |
|------|-----------|-----------|-----------|
| Mg1  | -4.033686 | 0.673586  | 0.891127  |
| Mg2  | -2.267391 | 3.071996  | 0.145442  |
| Mg3  | 2.958018  | -2.644940 | 0.495540  |
| Mg4  | 0.644105  | 2.097990  | -0.791090 |
| Mg5  | 3.428474  | -0.072635 | -1.313850 |
| Mg6  | -1.028597 | 0.651360  | 1.697879  |
| Mg7  | -1.747641 | -2.295462 | -2.556053 |
| Mg8  | 0.249302  | -2.094016 | 2.116926  |
| Mg9  | -2.016479 | 0.613731  | -1.561224 |
| Mg10 | 0.449045  | -1.119923 | -0.833198 |
| Mg11 | -2.362575 | -1.967737 | 0.437145  |
| Mg12 | 2.092410  | 0.351342  | 1.386289  |
| Mg13 | 3.635015  | 2.734709  | -0.114933 |

@mg13-isomer86 bp86/6-31G(d) Etot=-2601.145313 Eb=-11.54

|      |           |           |           |
|------|-----------|-----------|-----------|
| Mg1  | -0.736691 | 4.171901  | 0.016834  |
| Mg2  | 0.746066  | 1.525431  | -0.926496 |
| Mg3  | 3.610333  | -0.000428 | -1.621713 |
| Mg4  | 5.015155  | -0.000124 | 1.177065  |
| Mg5  | 1.936584  | -0.000231 | 1.548835  |
| Mg6  | -2.403658 | 1.525707  | -0.833643 |
| Mg7  | -0.915690 | 0.000070  | -2.980796 |
| Mg8  | 0.745706  | -1.525706 | -0.926516 |
| Mg9  | -0.722927 | 1.520707  | 1.844184  |
| Mg10 | -2.403936 | -1.525297 | -0.833676 |
| Mg11 | -0.737577 | -4.171761 | 0.017002  |
| Mg12 | -0.723241 | -1.520587 | 1.844208  |
| Mg13 | -3.410124 | 0.000319  | 1.674711  |

@mg13-isomer87 bp86/6-31G(d) Etot=-2601.145254 Eb=-11.54

|      |           |           |           |
|------|-----------|-----------|-----------|
| Mg1  | 0.257853  | 2.679491  | 0.734945  |
| Mg2  | 0.434797  | 1.034631  | -1.806791 |
| Mg3  | -1.238249 | -0.071560 | 1.004752  |
| Mg4  | 3.146693  | -0.598361 | -1.532337 |
| Mg5  | 0.208350  | 0.906565  | 3.436549  |
| Mg6  | -2.028096 | -0.755451 | -1.837690 |
| Mg7  | 2.041947  | -0.028277 | 1.150755  |
| Mg8  | -4.322093 | 0.003629  | 0.096000  |
| Mg9  | 3.239127  | -2.896851 | 0.546536  |
| Mg10 | -2.746000 | -2.759374 | 0.398110  |

|                                                          |           |           |           |
|----------------------------------------------------------|-----------|-----------|-----------|
| Mg11                                                     | 0.389296  | -2.250476 | -0.530077 |
| Mg12                                                     | -2.395511 | 2.325770  | -0.890520 |
| Mg13                                                     | 3.011886  | 2.410263  | -0.770233 |
| @mg13-isomer88 bp86/6-31G(d) Etot=-2601.144965 Eb=-11.53 |           |           |           |
| Mg1                                                      | 3.294559  | -0.319103 | -1.736140 |
| Mg2                                                      | 0.295354  | -0.619613 | -2.568533 |
| Mg3                                                      | 5.003956  | 0.440056  | 0.597377  |
| Mg4                                                      | 0.674571  | 1.689291  | -0.649030 |
| Mg5                                                      | -2.053734 | 1.290864  | -2.119519 |
| Mg6                                                      | 0.629652  | -1.200882 | 0.417518  |
| Mg7                                                      | -2.157131 | -1.627384 | -1.044371 |
| Mg8                                                      | 2.363373  | 0.915362  | 1.953490  |
| Mg9                                                      | -0.418192 | -4.332524 | 0.359891  |
| Mg10                                                     | -1.761021 | 3.486546  | 0.096383  |
| Mg11                                                     | -0.648598 | 1.175028  | 2.092934  |
| Mg12                                                     | -3.284744 | 0.759891  | 0.625125  |
| Mg13                                                     | -1.938045 | -1.657532 | 1.974873  |
| @mg13-isomer89 bp86/6-31G(d) Etot=-2601.144006 Eb=-11.48 |           |           |           |
| Mg1                                                      | 3.957239  | 0.000024  | -1.099606 |
| Mg2                                                      | 2.291665  | -2.556990 | -0.465378 |
| Mg3                                                      | 2.291704  | 2.556982  | -0.465234 |
| Mg4                                                      | 0.753410  | 0.000044  | -1.444581 |
| Mg5                                                      | 2.383951  | -0.000116 | 1.391938  |
| Mg6                                                      | -0.755605 | -2.702178 | -1.567166 |
| Mg7                                                      | -0.433678 | -1.645074 | 1.181008  |
| Mg8                                                      | -0.755526 | 2.702336  | -1.566988 |
| Mg9                                                      | -0.433573 | 1.645052  | 1.181134  |
| Mg10                                                     | -2.546007 | 0.000024  | -0.748405 |
| Mg11                                                     | -3.496481 | -2.750345 | -0.019019 |
| Mg12                                                     | -3.496510 | 2.750356  | -0.019054 |
| Mg13                                                     | 0.239412  | -0.000115 | 3.641351  |
| @mg13-isomer90 bp86/6-31G(d) Etot=-2601.143666 Eb=-11.46 |           |           |           |
| Mg1                                                      | -0.063554 | -1.699552 | 2.589050  |
| Mg2                                                      | -1.119947 | 1.013456  | 1.502447  |
| Mg3                                                      | -3.750946 | 0.337097  | -0.000004 |
| Mg4                                                      | 1.904893  | 0.341936  | 1.587617  |
| Mg5                                                      | -1.730153 | -1.873541 | -0.000005 |
| Mg6                                                      | 1.412374  | -2.273279 | 0.000036  |
| Mg7                                                      | -6.914289 | 0.685610  | 0.000044  |
| Mg8                                                      | -0.063514 | -1.699665 | -2.589009 |
| Mg9                                                      | -1.119990 | 1.013436  | -1.502570 |
| Mg10                                                     | 4.208687  | 2.093387  | -0.000024 |
| Mg11                                                     | 4.412288  | -1.049341 | 0.000007  |
| Mg12                                                     | 1.904822  | 0.341897  | -1.587549 |
| Mg13                                                     | 0.919329  | 2.768558  | -0.000040 |
| @mg13-isomer91 bp86/6-31G(d) Etot=-2601.143545 Eb=-11.46 |           |           |           |
| Mg1                                                      | 4.727671  | 0.238941  | 0.493050  |
| Mg2                                                      | -2.156866 | -4.213717 | 0.493107  |
| Mg3                                                      | -0.100830 | -1.929661 | 1.395347  |
| Mg4                                                      | -2.897563 | 1.508533  | -1.248272 |
| Mg5                                                      | 0.227086  | 3.157234  | -0.277066 |
| Mg6                                                      | 0.000036  | 0.000026  | -1.089242 |
| Mg7                                                      | -2.570803 | 3.974749  | 0.493094  |
| Mg8                                                      | -2.847789 | -1.381935 | -0.277165 |
| Mg9                                                      | 2.620658  | -1.775301 | -0.277073 |
| Mg10                                                     | -1.620777 | 1.052108  | 1.395356  |
| Mg11                                                     | 1.721569  | 0.877537  | 1.395334  |
| Mg12                                                     | 0.142365  | -3.263675 | -1.248247 |
| Mg13                                                     | 2.755245  | 1.755160  | -1.248222 |

@mg13-isomer92 bp86/6-31G(d) Etot=-2601.143091 Eb=-11.43

|      |           |           |           |
|------|-----------|-----------|-----------|
| Mg1  | -2.045430 | 0.194146  | -1.726989 |
| Mg2  | -3.523822 | 2.599149  | -0.481909 |
| Mg3  | -0.415719 | 2.452909  | -0.079351 |
| Mg4  | 2.333310  | 2.028769  | -1.864247 |
| Mg5  | -0.618278 | -2.721229 | -1.423472 |
| Mg6  | 2.363059  | -2.863668 | -0.064056 |
| Mg7  | 4.065612  | -0.286245 | -0.346695 |
| Mg8  | 0.893901  | -0.237722 | -0.519530 |
| Mg9  | -3.278846 | -2.136296 | -0.095366 |
| Mg10 | -2.428611 | 0.463230  | 1.334132  |
| Mg11 | -0.378394 | -2.125932 | 1.567032  |
| Mg12 | 2.701580  | 2.002428  | 1.065268  |
| Mg13 | 0.331640  | 0.630461  | 2.635183  |

@mg13-isomer93 bp86/6-31G(d) Etot=-2601.142503 Eb=-11.41

|      |           |           |           |
|------|-----------|-----------|-----------|
| Mg1  | -2.724992 | 3.086883  | 0.211772  |
| Mg2  | -2.606245 | 1.248201  | -2.291662 |
| Mg3  | -2.911114 | -0.029163 | 0.449009  |
| Mg4  | -2.381972 | -3.170728 | 0.590000  |
| Mg5  | -0.948439 | 1.530731  | 2.422091  |
| Mg6  | -0.076313 | 1.406777  | -0.617204 |
| Mg7  | -0.965530 | -1.425455 | -1.587353 |
| Mg8  | -0.106731 | -1.230393 | 1.455407  |
| Mg9  | 4.746774  | 0.072242  | 0.127813  |
| Mg10 | 2.081573  | 1.091152  | 1.546733  |
| Mg11 | 0.811567  | -3.782180 | -0.191200 |
| Mg12 | 3.003240  | 2.201283  | -1.173160 |
| Mg13 | 2.078182  | -0.999350 | -0.942244 |

@mg13-isomer94 bp86/6-31G(d) Etot=-2601.142488 Eb=-11.41

|      |           |           |           |
|------|-----------|-----------|-----------|
| Mg1  | 3.427050  | 1.975721  | 0.286799  |
| Mg2  | 2.269614  | -2.951164 | -0.538588 |
| Mg3  | 1.444113  | -0.359472 | 0.933380  |
| Mg4  | 0.610318  | 2.543112  | 1.680035  |
| Mg5  | 0.046404  | -1.178504 | -1.993700 |
| Mg6  | -3.252876 | -1.687069 | 2.208435  |
| Mg7  | -1.731155 | 0.567290  | 0.975292  |
| Mg8  | 0.672252  | 1.726009  | -1.232962 |
| Mg9  | -2.135028 | 1.039552  | -2.206990 |
| Mg10 | -2.022868 | 3.388522  | -0.074095 |
| Mg11 | -0.663831 | -2.609333 | 0.678832  |
| Mg12 | -3.112216 | -1.526827 | -0.851195 |
| Mg13 | 4.448224  | -0.927838 | 0.134758  |

@mg13-isomer95 bp86/6-31G(d) Etot=-2601.142113 Eb=-11.39

|      |           |           |           |
|------|-----------|-----------|-----------|
| Mg1  | 3.885731  | -0.536762 | 0.376670  |
| Mg2  | 1.736359  | -2.806010 | 0.722598  |
| Mg3  | 1.134836  | -0.167539 | -1.004966 |
| Mg4  | 2.552735  | 2.274645  | 0.496910  |
| Mg5  | 3.600614  | 1.230653  | -2.186428 |
| Mg6  | 1.452542  | 0.048165  | 2.387298  |
| Mg7  | -0.588329 | 1.940145  | 0.940638  |
| Mg8  | -0.983003 | -1.205714 | 1.224313  |
| Mg9  | -0.585014 | -2.642224 | -1.450299 |
| Mg10 | -3.736855 | 0.643650  | 0.948811  |
| Mg11 | -3.024303 | 3.198082  | -0.558274 |
| Mg12 | -1.951092 | 0.272002  | -1.493942 |
| Mg13 | -3.494222 | -2.249093 | -0.403330 |

@mg13-isomer96 bp86/6-31G(d) Etot=-2601.142074 Eb=-11.39

|     |           |           |           |
|-----|-----------|-----------|-----------|
| Mg1 | 1.145787  | 0.126842  | 1.096615  |
| Mg2 | 0.602149  | 2.556149  | -0.813301 |
| Mg3 | -1.805797 | -1.047926 | 1.607023  |

|      |           |           |           |
|------|-----------|-----------|-----------|
| Mg4  | 4.186455  | -1.044417 | 0.493614  |
| Mg5  | -1.114269 | 2.221219  | 1.709100  |
| Mg6  | -3.026460 | 1.028094  | -0.409709 |
| Mg7  | -3.512132 | -2.080252 | -0.595015 |
| Mg8  | -2.081346 | 3.982696  | -0.519872 |
| Mg9  | 3.455248  | 2.084106  | 0.249177  |
| Mg10 | 2.297040  | -0.121942 | -1.650794 |
| Mg11 | -1.171158 | -3.915689 | 0.128092  |
| Mg12 | 1.668206  | -2.846351 | -0.082726 |
| Mg13 | -0.643724 | -0.942529 | -1.212205 |

@mg13-isomer97 bp86/6-31G(d) Etot=-2601.141927 Eb=-11.38

|      |           |           |           |
|------|-----------|-----------|-----------|
| Mg1  | -2.993472 | -0.868372 | 0.000055  |
| Mg2  | -5.845216 | -2.275867 | -0.000036 |
| Mg3  | 2.532719  | -3.048282 | -1.525636 |
| Mg4  | -0.030470 | -1.376503 | -0.000125 |
| Mg5  | 1.238042  | -0.353955 | -2.623324 |
| Mg6  | -1.310766 | 1.066533  | -1.633887 |
| Mg7  | 2.532697  | -3.048464 | 1.525572  |
| Mg8  | -1.310661 | 1.066420  | 1.634010  |
| Mg9  | 1.238147  | -0.354176 | 2.623215  |
| Mg10 | 2.549227  | 0.282418  | -0.000049 |
| Mg11 | 1.238890  | 2.601594  | -1.629118 |
| Mg12 | -1.078153 | 3.707190  | 0.000149  |
| Mg13 | 1.239017  | 2.601465  | 1.629174  |

@mg13-isomer98 bp86/6-31G(d) Etot=-2601.141683 Eb=-11.37

|      |           |           |           |
|------|-----------|-----------|-----------|
| Mg1  | -1.844711 | 0.664456  | 1.539801  |
| Mg2  | -1.454279 | -2.021775 | -0.000042 |
| Mg3  | 0.530753  | 2.138885  | -2.635012 |
| Mg4  | 6.239417  | -2.479857 | 0.000000  |
| Mg5  | 0.892392  | -0.772824 | 1.541809  |
| Mg6  | 3.513848  | -0.858201 | -0.000091 |
| Mg7  | 0.530722  | 2.138780  | 2.635115  |
| Mg8  | -1.844775 | 0.664511  | -1.539869 |
| Mg9  | -4.327582 | -3.326801 | 0.000031  |
| Mg10 | -0.650242 | 3.102882  | 0.000040  |
| Mg11 | 0.892339  | -0.772758 | -1.541822 |
| Mg12 | 2.061584  | 1.763600  | 0.000051  |
| Mg13 | -4.539466 | -0.240899 | -0.000011 |

@mg13-isomer99 bp86/6-31G(d) Etot=-2601.141664 Eb=-11.37

|      |           |           |           |
|------|-----------|-----------|-----------|
| Mg1  | 0.331792  | -4.300109 | 0.565373  |
| Mg2  | 1.429036  | -1.135170 | 0.443756  |
| Mg3  | -0.915926 | -1.444521 | 2.312551  |
| Mg4  | 3.942846  | -0.137539 | -1.466164 |
| Mg5  | -1.422902 | -1.681138 | -0.731503 |
| Mg6  | 0.832498  | -0.670109 | -2.567984 |
| Mg7  | 0.348026  | 1.324278  | 2.057746  |
| Mg8  | 3.547591  | 1.051897  | 1.466744  |
| Mg9  | 1.309911  | 1.794161  | -0.812654 |
| Mg10 | -2.627700 | 0.920356  | 1.242337  |
| Mg11 | -4.216861 | -0.380061 | -0.954337 |
| Mg12 | -1.558215 | 1.137198  | -1.797753 |
| Mg13 | -1.000094 | 3.520759  | 0.241888  |

@mg13-isomer100 bp86/6-31G(d) Etot=-2601.141584 Eb=-11.36

|     |           |           |           |
|-----|-----------|-----------|-----------|
| Mg1 | 1.381342  | -0.264493 | -2.282297 |
| Mg2 | 0.773943  | 1.833532  | -0.099294 |
| Mg3 | 1.218044  | -0.238993 | 2.353982  |
| Mg4 | -1.531037 | 0.018427  | -1.300199 |
| Mg5 | -1.032645 | -2.069450 | 1.199665  |
| Mg6 | -1.911665 | 2.978587  | -0.750687 |
| Mg7 | 1.879411  | -2.288033 | 0.187665  |

|                                                           |           |           |           |
|-----------------------------------------------------------|-----------|-----------|-----------|
| Mg8                                                       | 3.374623  | 0.312456  | 0.123747  |
| Mg9                                                       | -4.513249 | 1.554483  | -0.174374 |
| Mg10                                                      | -1.569869 | 0.867517  | 1.639449  |
| Mg11                                                      | -3.962041 | -1.265886 | 0.697052  |
| Mg12                                                      | 6.379030  | 1.271944  | 0.171695  |
| Mg13                                                      | -0.485888 | -2.710092 | -1.766403 |
|                                                           |           |           |           |
| @mg13-isomer101 bp86/6-31G(d) Etot=-2601.141492 Eb=-11.36 |           |           |           |
| Mg1                                                       | 4.327497  | -0.000202 | 1.192039  |
| Mg2                                                       | 1.570151  | 1.554065  | 0.688485  |
| Mg3                                                       | 0.000540  | -0.000024 | 2.846718  |
| Mg4                                                       | -0.000102 | 4.172200  | -0.213670 |
| Mg5                                                       | 1.570170  | -1.554314 | 0.688531  |
| Mg6                                                       | 2.862034  | 0.000104  | -1.745745 |
| Mg7                                                       | -1.569938 | 1.553933  | 0.688942  |
| Mg8                                                       | -1.570055 | -1.554308 | 0.689043  |
| Mg9                                                       | -0.000150 | 1.492283  | -2.033410 |
| Mg10                                                      | -4.327652 | -0.000113 | 1.192062  |
| Mg11                                                      | -2.862186 | 0.000128  | -1.745404 |
| Mg12                                                      | -0.000197 | -1.491722 | -2.033203 |
| Mg13                                                      | -0.000110 | -4.172030 | -0.214387 |
|                                                           |           |           |           |
| @mg13-isomer102 bp86/6-31G(d) Etot=-2601.140844 Eb=-11.33 |           |           |           |
| Mg1                                                       | 1.756477  | -2.194112 | 0.775450  |
| Mg2                                                       | 0.809095  | -1.282955 | -1.941890 |
| Mg3                                                       | 3.494152  | 0.015587  | -0.794247 |
| Mg4                                                       | -1.354280 | -1.780305 | 0.243630  |
| Mg5                                                       | -1.771101 | 0.530486  | -1.804903 |
| Mg6                                                       | 1.861729  | 0.926704  | 1.597713  |
| Mg7                                                       | 3.514424  | 3.234799  | 0.026320  |
| Mg8                                                       | 0.975355  | 1.777956  | -1.233527 |
| Mg9                                                       | -4.163549 | -0.221173 | 0.330459  |
| Mg10                                                      | -0.118313 | -0.920987 | 2.948294  |
| Mg11                                                      | -3.825242 | 2.809320  | -0.348617 |
| Mg12                                                      | -1.223898 | 1.272336  | 1.074983  |
| Mg13                                                      | 0.045150  | -4.167656 | -0.873664 |
|                                                           |           |           |           |
| @mg13-isomer103 bp86/6-31G(d) Etot=-2601.140795 Eb=-11.32 |           |           |           |
| Mg1                                                       | 4.462464  | 0.334387  | -1.061983 |
| Mg2                                                       | -3.293352 | -0.070947 | 0.266023  |
| Mg3                                                       | 2.746112  | 2.060320  | 0.817667  |
| Mg4                                                       | 1.116558  | 0.414161  | 3.055376  |
| Mg5                                                       | -3.492786 | 3.052894  | 0.241637  |
| Mg6                                                       | 1.516576  | 1.236631  | -1.864664 |
| Mg7                                                       | -0.654514 | -1.582314 | 1.560966  |
| Mg8                                                       | 0.737296  | -3.655798 | -0.408924 |
| Mg9                                                       | -2.672023 | -3.070007 | -0.359661 |
| Mg10                                                      | 2.175299  | -1.117123 | 0.287925  |
| Mg11                                                      | -0.564309 | -1.025011 | -1.471328 |
| Mg12                                                      | -1.564876 | 1.896754  | -1.891762 |
| Mg13                                                      | -0.512446 | 1.526053  | 0.828728  |
|                                                           |           |           |           |
| @mg13-isomer104 bp86/6-31G(d) Etot=-2601.140456 Eb=-11.31 |           |           |           |
| Mg1                                                       | 4.271026  | 0.060415  | -0.685296 |
| Mg2                                                       | 0.941602  | 1.219816  | -1.032278 |
| Mg3                                                       | -1.976995 | 1.087197  | -2.132006 |
| Mg4                                                       | -0.898835 | 3.580482  | -0.429545 |
| Mg5                                                       | 2.086242  | -1.297522 | -2.250650 |
| Mg6                                                       | 3.153535  | 1.456022  | 1.733544  |
| Mg7                                                       | -0.718126 | -1.570603 | -1.284795 |
| Mg8                                                       | 0.039485  | 1.502329  | 1.935110  |
| Mg9                                                       | 1.337948  | -1.085473 | 0.979638  |
| Mg10                                                      | -3.624649 | -1.073732 | -0.553901 |
| Mg11                                                      | -2.864331 | 1.411523  | 0.930728  |

|                                                           |           |           |           |
|-----------------------------------------------------------|-----------|-----------|-----------|
| Mg12                                                      | -0.128551 | -4.073831 | 0.932499  |
| Mg13                                                      | -1.618352 | -1.216624 | 1.856953  |
| @mg13-isomer105 bp86/6-31G(d) Etot=-2601.140318 Eb=-11.30 |           |           |           |
| Mg1                                                       | -0.338119 | -4.045835 | 0.703636  |
| Mg2                                                       | -3.077609 | -2.844976 | -0.351015 |
| Mg3                                                       | 2.577458  | -0.334860 | -1.807363 |
| Mg4                                                       | 0.471594  | 3.894110  | 0.166826  |
| Mg5                                                       | -2.397302 | 3.370306  | -0.883353 |
| Mg6                                                       | 0.013278  | 0.957763  | -0.525449 |
| Mg7                                                       | -0.256033 | -2.014878 | -1.465403 |
| Mg8                                                       | 4.659670  | -0.511199 | 0.340808  |
| Mg9                                                       | -1.805738 | 2.064560  | 1.672924  |
| Mg10                                                      | 2.779961  | 1.891965  | 0.471920  |
| Mg11                                                      | 1.834602  | -1.657642 | 0.809550  |
| Mg12                                                      | -1.278478 | -1.104228 | 1.389548  |
| Mg13                                                      | -3.183286 | 0.334915  | -0.522626 |
| @mg13-isomer106 bp86/6-31G(d) Etot=-2601.140292 Eb=-11.30 |           |           |           |
| Mg1                                                       | -2.013271 | -2.399921 | -0.656979 |
| Mg2                                                       | 0.000045  | 0.167816  | -0.529706 |
| Mg3                                                       | -2.513665 | -0.045115 | 1.345477  |
| Mg4                                                       | 3.021837  | 0.441695  | -1.531376 |
| Mg5                                                       | 4.358832  | 2.318153  | 0.442870  |
| Mg6                                                       | -1.486704 | 2.997943  | -0.105962 |
| Mg7                                                       | 0.000057  | -2.152388 | 1.666216  |
| Mg8                                                       | 0.000050  | -4.640761 | -0.124462 |
| Mg9                                                       | -3.021862 | 0.441565  | -1.531376 |
| Mg10                                                      | -4.358968 | 2.318002  | 0.442852  |
| Mg11                                                      | 1.486574  | 2.998047  | -0.105901 |
| Mg12                                                      | 2.013322  | -2.399891 | -0.657104 |
| Mg13                                                      | 2.513754  | -0.045145 | 1.345451  |
| @mg13-isomer107 bp86/6-31G(d) Etot=-2601.140102 Eb=-11.29 |           |           |           |
| Mg1                                                       | -1.529445 | -1.286678 | -1.238998 |
| Mg2                                                       | 1.288391  | 2.085500  | 1.723427  |
| Mg3                                                       | -2.124371 | -1.544341 | 1.996273  |
| Mg4                                                       | 3.874450  | -0.471013 | -1.425385 |
| Mg5                                                       | 1.288380  | -2.085431 | -1.723527 |
| Mg6                                                       | -1.529461 | 1.286682  | 1.239184  |
| Mg7                                                       | -0.358409 | -3.821550 | 0.422362  |
| Mg8                                                       | -2.124452 | 1.544232  | -1.996321 |
| Mg9                                                       | -3.949652 | 0.000009  | 0.000082  |
| Mg10                                                      | -0.358517 | 3.821462  | -0.422444 |
| Mg11                                                      | 3.874534  | 0.471049  | 1.425479  |
| Mg12                                                      | 0.824286  | -0.940275 | 1.236666  |
| Mg13                                                      | 0.824267  | 0.940354  | -1.236799 |
| @mg13-isomer108 bp86/6-31G(d) Etot=-2601.139941 Eb=-11.28 |           |           |           |
| Mg1                                                       | 1.413675  | -3.815980 | -0.710637 |
| Mg2                                                       | -0.760395 | -1.554070 | -0.164490 |
| Mg3                                                       | -3.010507 | -1.414540 | 2.010983  |
| Mg4                                                       | -3.776380 | -1.002051 | -1.028640 |
| Mg5                                                       | 2.218570  | -1.252607 | 0.823056  |
| Mg6                                                       | 1.334786  | -0.786813 | -2.212778 |
| Mg7                                                       | 0.000084  | -0.000282 | 2.563678  |
| Mg8                                                       | -1.334858 | 0.787192  | -2.212647 |
| Mg9                                                       | -2.218408 | 1.252400  | 0.823394  |
| Mg10                                                      | 3.776359  | 1.002338  | -1.028605 |
| Mg11                                                      | 0.760432  | 1.554181  | -0.164291 |
| Mg12                                                      | 3.010610  | 1.414130  | 2.011116  |
| Mg13                                                      | -1.413968 | 3.816102  | -0.710139 |
| @mg13-isomer109 bp86/6-31G(d) Etot=-2601.139775 Eb=-11.27 |           |           |           |

|      |           |           |           |
|------|-----------|-----------|-----------|
| Mg1  | 1.845614  | 1.741785  | 0.000492  |
| Mg2  | -1.148977 | -1.066328 | 1.246471  |
| Mg3  | -1.845640 | 1.741778  | -0.000662 |
| Mg4  | -1.827087 | -0.806014 | -1.752580 |
| Mg5  | 4.120456  | -0.297372 | -0.454793 |
| Mg6  | 1.148955  | -1.066463 | -1.246266 |
| Mg7  | 1.827099  | -0.805819 | 1.752684  |
| Mg8  | 0.023669  | 1.676227  | -2.408622 |
| Mg9  | -0.023681 | 1.676524  | 2.408420  |
| Mg10 | -0.000066 | 4.050465  | -0.000045 |
| Mg11 | -4.120412 | -0.297404 | 0.454882  |
| Mg12 | -3.347171 | -3.273723 | -0.047760 |
| Mg13 | 3.347240  | -3.273657 | 0.047781  |

@mg13-isomer110 bp86/6-31G(d) Etot=-2601.139524 Eb=-11.26

|      |           |           |           |
|------|-----------|-----------|-----------|
| Mg1  | -1.198428 | -1.706469 | 1.531683  |
| Mg2  | 4.437462  | -2.022049 | -0.000006 |
| Mg3  | -0.143372 | -4.256140 | 0.000040  |
| Mg4  | 1.470399  | -1.610367 | -0.000005 |
| Mg5  | 0.589011  | 1.021781  | 1.514301  |
| Mg6  | 3.418629  | 0.954336  | -0.000033 |
| Mg7  | -2.595320 | 1.248650  | 1.536572  |
| Mg8  | -3.812650 | -1.222110 | 0.000030  |
| Mg9  | -1.198481 | -1.706566 | -1.531720 |
| Mg10 | -1.000536 | 3.401270  | -0.000005 |
| Mg11 | 0.588893  | 1.021700  | -1.514241 |
| Mg12 | 2.039774  | 3.627339  | -0.000062 |
| Mg13 | -2.595380 | 1.248624  | -1.536555 |

@mg13-isomer111 bp86/6-31G(d) Etot=-2601.139451 Eb=-11.26

|      |           |           |           |
|------|-----------|-----------|-----------|
| Mg1  | 2.107537  | 1.254713  | 0.939248  |
| Mg2  | -0.060868 | -1.075289 | 0.904830  |
| Mg3  | 5.126286  | -3.671477 | -0.039070 |
| Mg4  | 2.762200  | -1.542164 | -0.026246 |
| Mg5  | -4.101444 | -2.980913 | -1.164672 |
| Mg6  | -1.969696 | -0.782992 | -1.638796 |
| Mg7  | -1.166024 | 2.174609  | -1.869623 |
| Mg8  | -0.114623 | 1.178790  | 2.993152  |
| Mg9  | 1.759613  | 3.066135  | -1.588572 |
| Mg10 | 0.978213  | 0.065417  | -1.854631 |
| Mg11 | -0.065909 | 3.348925  | 0.871967  |
| Mg12 | -3.043098 | -2.098544 | 1.633079  |
| Mg13 | -2.212188 | 1.062791  | 0.839333  |

@mg13-isomer112 bp86/6-31G(d) Etot=-2601.139411 Eb=-11.26

|      |           |           |           |
|------|-----------|-----------|-----------|
| Mg1  | 1.902670  | -0.934457 | -0.615327 |
| Mg2  | -1.106151 | -1.100291 | -1.392885 |
| Mg3  | -0.261830 | 1.483996  | 0.569657  |
| Mg4  | 4.768267  | 0.093193  | 0.358768  |
| Mg5  | -2.510351 | 1.704518  | -1.495855 |
| Mg6  | 0.550006  | -3.709193 | -0.641965 |
| Mg7  | -2.975209 | 0.007122  | 1.039376  |
| Mg8  | 0.487056  | 1.139997  | -2.585091 |
| Mg9  | -2.945078 | 3.227240  | 1.102499  |
| Mg10 | -2.615280 | -3.139891 | 0.353175  |
| Mg11 | 2.196595  | 0.513372  | 2.141044  |
| Mg12 | 2.722249  | 2.251046  | -0.431352 |
| Mg13 | -0.212945 | -1.536651 | 1.597955  |

@mg13-isomer113 bp86/6-31G(d) Etot=-2601.138655 Eb=-11.22

|     |           |           |           |
|-----|-----------|-----------|-----------|
| Mg1 | -2.378108 | -0.469727 | -1.822617 |
| Mg2 | 0.465972  | 0.549087  | -0.894839 |
| Mg3 | -4.818392 | 0.797776  | -0.350358 |
| Mg4 | 3.037172  | 1.125538  | 0.906423  |

|      |           |           |           |
|------|-----------|-----------|-----------|
| Mg5  | 0.730792  | -0.697206 | 2.264287  |
| Mg6  | -0.677833 | -2.370902 | 0.040445  |
| Mg7  | 2.446560  | -1.775856 | -0.166486 |
| Mg8  | -3.969139 | -2.129215 | 0.308073  |
| Mg9  | -1.993972 | 0.198920  | 1.227749  |
| Mg10 | 3.394654  | 0.472408  | -2.093812 |
| Mg11 | 0.133586  | 2.376273  | 1.606305  |
| Mg12 | 5.519531  | -0.545174 | -0.128587 |
| Mg13 | -1.890822 | 2.468079  | -0.896585 |

@mg13-isomer114 bp86/6-31G(d) Etot=-2601.138537 Eb=-11.22

|      |           |           |           |
|------|-----------|-----------|-----------|
| Mg1  | -3.885395 | 0.479038  | 0.763337  |
| Mg2  | 0.839163  | -0.405400 | 2.626270  |
| Mg3  | -1.334684 | -1.278013 | 0.681414  |
| Mg4  | -0.855054 | 1.730391  | 1.041446  |
| Mg5  | 1.058740  | -3.128772 | 0.825901  |
| Mg6  | 4.334647  | 1.686757  | -0.903384 |
| Mg7  | -3.385378 | 3.286381  | -0.412147 |
| Mg8  | -1.602905 | -4.111770 | -0.720825 |
| Mg9  | 0.395610  | -1.650698 | -1.858451 |
| Mg10 | -1.724355 | 0.656591  | -1.706889 |
| Mg11 | 1.234273  | 1.382038  | -1.611320 |
| Mg12 | 2.722257  | -0.753414 | 0.048739  |
| Mg13 | 2.203081  | 2.106872  | 1.225908  |

@mg13-isomer115 bp86/6-31G(d) Etot=-2601.138393 Eb=-11.21

|      |           |           |           |
|------|-----------|-----------|-----------|
| Mg1  | -2.002825 | 1.709640  | -1.651629 |
| Mg2  | -0.438950 | -0.870475 | -0.975289 |
| Mg3  | -4.533738 | 2.021973  | 0.022506  |
| Mg4  | 2.895276  | -0.532206 | -0.317117 |
| Mg5  | 3.161028  | 1.441773  | 1.932033  |
| Mg6  | 0.723371  | -0.545975 | 2.129280  |
| Mg7  | -1.844028 | 0.816337  | 1.306004  |
| Mg8  | 0.765007  | 1.992960  | -0.093117 |
| Mg9  | -1.767934 | -2.415170 | 1.508746  |
| Mg10 | 1.214498  | -3.084757 | 0.326678  |
| Mg11 | 1.748615  | -2.169556 | -2.608821 |
| Mg12 | -3.664257 | -0.906484 | -0.656215 |
| Mg13 | 3.743937  | 2.541941  | -0.923060 |

@mg13-isomer116 bp86/6-31G(d) Etot=-2601.138086 Eb=-11.19

|      |           |           |           |
|------|-----------|-----------|-----------|
| Mg1  | -3.112627 | 3.052513  | -0.705198 |
| Mg2  | -3.580041 | 0.046151  | -0.360380 |
| Mg3  | -0.884003 | 1.507989  | 0.842919  |
| Mg4  | -1.245637 | 1.223375  | -2.282692 |
| Mg5  | -2.175965 | -1.231589 | 2.101729  |
| Mg6  | -3.372591 | -2.957587 | -0.171397 |
| Mg7  | 1.932679  | 2.180509  | 2.171111  |
| Mg8  | -0.656461 | -1.584535 | -0.746785 |
| Mg9  | 1.519334  | 0.807245  | -0.994902 |
| Mg10 | 0.914005  | -0.723029 | 1.821057  |
| Mg11 | 2.460966  | -2.216387 | -0.635663 |
| Mg12 | 4.299267  | -0.222103 | -2.025909 |
| Mg13 | 3.901075  | 0.117449  | 0.986110  |

@mg13-isomer117 bp86/6-31G(d) Etot=-2601.137543 Eb=-11.17

|     |           |           |           |
|-----|-----------|-----------|-----------|
| Mg1 | -1.546566 | 0.701166  | 1.671942  |
| Mg2 | 1.118349  | 2.163884  | 1.792390  |
| Mg3 | 1.016554  | -0.853398 | 2.309160  |
| Mg4 | -1.313122 | 3.642684  | 0.548559  |
| Mg5 | 1.008885  | 2.741531  | -1.219496 |
| Mg6 | 5.005475  | -1.712224 | -0.417148 |
| Mg7 | 2.403510  | -3.220677 | 0.461233  |
| Mg8 | 2.492144  | 0.194243  | -0.217880 |



|      |           |           |           |
|------|-----------|-----------|-----------|
| Mg9  | -5.890694 | -2.679871 | -0.212768 |
| Mg10 | -0.250913 | -1.389836 | -0.386551 |
| Mg11 | -3.224269 | -0.982604 | -0.130115 |
| Mg12 | -1.660366 | 1.239244  | -1.386745 |
| Mg13 | 0.841014  | 0.155856  | -2.812581 |

@mg13-isomer118 bp86/6-31G(d) Etot=-2601.137542 Eb=-11.17

|      |           |           |           |
|------|-----------|-----------|-----------|
| Mg1  | -0.690725 | -2.083982 | 0.011317  |
| Mg2  | 5.554751  | -0.191096 | -0.003111 |
| Mg3  | -2.237756 | 2.834294  | -0.012431 |
| Mg4  | -2.137752 | 0.200441  | 1.562163  |
| Mg5  | -2.136346 | 0.186100  | -1.563365 |
| Mg6  | 3.144253  | 1.092370  | -1.560376 |
| Mg7  | 2.379204  | -1.444104 | 0.008155  |
| Mg8  | -3.956162 | -2.074094 | 0.006548  |
| Mg9  | 0.392086  | 1.210276  | -0.002586 |
| Mg10 | 0.679184  | -0.869211 | -2.520245 |
| Mg11 | 3.147273  | 1.107266  | 1.549116  |
| Mg12 | -4.817152 | 0.874110  | -0.005851 |
| Mg13 | 0.679141  | -0.842369 | 2.530666  |

@mg13-isomer119 bp86/6-31G(d) Etot=-2601.137040 Eb=-11.14

|      |           |           |           |
|------|-----------|-----------|-----------|
| Mg1  | 0.272851  | 1.416979  | -1.268986 |
| Mg2  | -1.348499 | -0.822516 | -2.466767 |
| Mg3  | -0.978989 | -1.371221 | 0.644535  |
| Mg4  | -2.926313 | 1.062662  | -0.306754 |
| Mg5  | 1.448608  | -1.488852 | -1.443088 |
| Mg6  | 3.484767  | 1.424629  | -0.683057 |
| Mg7  | 1.519498  | 3.090544  | 0.939058  |
| Mg8  | -3.810504 | -1.852059 | -0.667153 |
| Mg9  | 1.726505  | 0.082882  | 1.488719  |
| Mg10 | -1.512708 | 3.657927  | 0.225892  |
| Mg11 | 4.094295  | -1.538820 | 0.198033  |
| Mg12 | -3.595937 | -0.642866 | 2.147709  |
| Mg13 | 1.626426  | -3.019289 | 1.191857  |

@mg13-isomer120 bp86/6-31G(d) Etot=-2601.136995 Eb=-11.14

|      |           |           |           |
|------|-----------|-----------|-----------|
| Mg1  | 0.578859  | 0.694897  | 1.388848  |
| Mg2  | 1.195435  | 2.347538  | -1.102081 |
| Mg3  | 3.820069  | -0.689753 | 1.367363  |
| Mg4  | 1.195544  | -2.347537 | 1.102053  |
| Mg5  | 0.578798  | -0.694907 | -1.388904 |
| Mg6  | -1.768962 | 1.517470  | -0.659016 |
| Mg7  | -1.768847 | -1.517501 | 0.659115  |
| Mg8  | 3.271842  | 2.342300  | 1.175310  |
| Mg9  | -3.845002 | 0.582017  | 1.395637  |
| Mg10 | 3.271893  | -2.342238 | -1.175345 |
| Mg11 | -3.844958 | -0.582190 | -1.395565 |
| Mg12 | 3.819986  | 0.689816  | -1.367361 |
| Mg13 | -6.504657 | 0.000088  | -0.000054 |

@mg13-isomer121 bp86/6-31G(d) Etot=-2601.136969 Eb=-11.14

|      |           |           |           |
|------|-----------|-----------|-----------|
| Mg1  | 2.718298  | 0.002630  | -2.660802 |
| Mg2  | 2.431549  | 1.522565  | 0.118719  |
| Mg3  | 0.615586  | 4.178341  | -0.111536 |
| Mg4  | 2.433455  | -1.519655 | 0.117541  |
| Mg5  | 1.569569  | -0.000107 | 2.648589  |
| Mg6  | 0.100659  | 1.534073  | -1.892726 |
| Mg7  | -0.580012 | 1.545199  | 1.149001  |
| Mg8  | 0.102595  | -1.532849 | -1.893936 |
| Mg9  | 0.620967  | -4.177719 | -0.114542 |
| Mg10 | -2.347388 | -0.001328 | -0.851438 |
| Mg11 | -5.449586 | -0.001561 | -1.625041 |
| Mg12 | -1.637704 | -0.002594 | 3.968337  |

|                                                           |           |           |           |  |
|-----------------------------------------------------------|-----------|-----------|-----------|--|
| Mg13                                                      | -0.577987 | -1.546995 | 1.147834  |  |
| @mg13-isomer122 bp86/6-31G(d) Etot=-2601.136417 Eb=-11.11 |           |           |           |  |
| Mg1                                                       | 0.706680  | 1.556641  | -1.062095 |  |
| Mg2                                                       | -1.288401 | 0.000249  | -2.847800 |  |
| Mg3                                                       | -2.345754 | 1.556000  | -0.432584 |  |
| Mg4                                                       | -2.346370 | -1.555149 | -0.432642 |  |
| Mg5                                                       | -0.686466 | 4.308787  | -1.053961 |  |
| Mg6                                                       | -0.780289 | 2.885112  | 1.798073  |  |
| Mg7                                                       | -0.688109 | -4.308562 | -1.053944 |  |
| Mg8                                                       | 0.706061  | -1.556921 | -1.062035 |  |
| Mg9                                                       | -2.316173 | 0.000408  | 2.273338  |  |
| Mg10                                                      | 3.036424  | -0.000593 | 0.130426  |  |
| Mg11                                                      | -0.781394 | -2.884829 | 1.798049  |  |
| Mg12                                                      | 0.579623  | -0.000095 | 1.784689  |  |
| Mg13                                                      | 6.204167  | -0.001048 | 0.160485  |  |
| @mg13-isomer123 bp86/6-31G(d) Etot=-2601.136390 Eb=-11.11 |           |           |           |  |
| Mg1                                                       | -1.025954 | 1.439953  | -1.372678 |  |
| Mg2                                                       | -3.294283 | 0.910468  | 0.672476  |  |
| Mg3                                                       | 1.654705  | 2.505127  | -0.127034 |  |
| Mg4                                                       | -0.038452 | 0.486448  | 1.742983  |  |
| Mg5                                                       | 3.182744  | 0.236941  | 1.336874  |  |
| Mg6                                                       | 1.243368  | -0.714764 | -1.141350 |  |
| Mg7                                                       | 3.811022  | -2.300379 | -0.380919 |  |
| Mg8                                                       | 3.919647  | 0.773189  | -1.576485 |  |
| Mg9                                                       | -1.430135 | -1.769807 | -0.049466 |  |
| Mg10                                                      | 1.213437  | -2.323457 | 1.503276  |  |
| Mg11                                                      | -3.509317 | -0.474945 | -2.078042 |  |
| Mg12                                                      | -1.306763 | 3.303454  | 1.024991  |  |
| Mg13                                                      | -4.420020 | -2.072228 | 0.445375  |  |
| @mg13-isomer124 bp86/6-31G(d) Etot=-2601.136301 Eb=-11.11 |           |           |           |  |
| Mg1                                                       | 2.015588  | 1.690806  | -1.287446 |  |
| Mg2                                                       | -3.580887 | 0.043594  | -0.049256 |  |
| Mg3                                                       | 1.989684  | 1.076679  | 1.715201  |  |
| Mg4                                                       | -0.904954 | -1.498724 | -0.428093 |  |
| Mg5                                                       | 4.766674  | 0.554219  | 0.100008  |  |
| Mg6                                                       | 0.638692  | -1.649409 | 2.199228  |  |
| Mg7                                                       | 2.207077  | -1.292015 | -0.374756 |  |
| Mg8                                                       | -6.824570 | 0.041545  | 0.067440  |  |
| Mg9                                                       | -1.047152 | 0.875949  | 1.665220  |  |
| Mg10                                                      | 0.331010  | 3.543470  | 0.578585  |  |
| Mg11                                                      | 0.814055  | -4.352820 | 0.056927  |  |
| Mg12                                                      | -1.057146 | 1.489732  | -1.343739 |  |
| Mg13                                                      | 0.651928  | -0.523027 | -2.899320 |  |
| @mg13-isomer125 bp86/6-31G(d) Etot=-2601.136013 Eb=-11.09 |           |           |           |  |
| Mg1                                                       | -3.408284 | 2.846352  | 0.092207  |  |
| Mg2                                                       | -0.697414 | 3.626255  | -1.180701 |  |
| Mg3                                                       | 4.169266  | 1.528358  | 0.092196  |  |
| Mg4                                                       | -0.531201 | 1.848084  | 1.231621  |  |
| Mg5                                                       | -2.791854 | -2.417075 | -1.180512 |  |
| Mg6                                                       | 3.489136  | -1.209280 | -1.180567 |  |
| Mg7                                                       | -0.000024 | 0.000131  | 3.627988  |  |
| Mg8                                                       | 1.865991  | -0.463879 | 1.231660  |  |
| Mg9                                                       | 0.375334  | -1.775776 | -1.352604 |  |
| Mg10                                                      | -1.725489 | 0.562781  | -1.352592 |  |
| Mg11                                                      | 1.350209  | 1.212933  | -1.352598 |  |
| Mg12                                                      | -0.760984 | -4.374866 | 0.092256  |  |
| Mg13                                                      | -1.334686 | -1.384019 | 1.231647  |  |
| @mg13-isomer126 bp86/6-31G(d) Etot=-2601.135929 Eb=-11.09 |           |           |           |  |
| Mg1                                                       | 1.016610  | 2.221945  | 0.692326  |  |

|      |           |           |           |
|------|-----------|-----------|-----------|
| Mg2  | -0.344091 | 1.699086  | -2.014749 |
| Mg3  | -0.059374 | -0.999254 | -0.143752 |
| Mg4  | -2.715327 | -1.213464 | 1.351318  |
| Mg5  | 2.449486  | -0.481425 | 1.563504  |
| Mg6  | 4.996204  | -0.989327 | -0.319000 |
| Mg7  | -0.347310 | 0.323444  | 2.787361  |
| Mg8  | 2.431708  | 0.308220  | -1.459940 |
| Mg9  | 2.602219  | -2.888238 | -0.472196 |
| Mg10 | -2.147917 | 1.608120  | 0.499692  |
| Mg11 | -4.252245 | -3.297797 | -0.508946 |
| Mg12 | -2.659304 | -0.594104 | -1.638077 |
| Mg13 | -0.970659 | 4.302793  | -0.337542 |

@mg13-isomer127 bp86/6-31G(d) Etot=-2601.135753 Eb=-11.08

|      |           |           |           |
|------|-----------|-----------|-----------|
| Mg1  | -0.132460 | 1.253915  | -1.277160 |
| Mg2  | -1.906751 | -1.359107 | -1.536233 |
| Mg3  | -3.352594 | 1.488458  | -0.773569 |
| Mg4  | 3.054155  | 0.622820  | -0.910229 |
| Mg5  | -1.228991 | 3.360574  | 0.708219  |
| Mg6  | 0.876076  | -1.757108 | -0.049593 |
| Mg7  | -1.514457 | -0.021069 | 1.201856  |
| Mg8  | 1.351234  | 1.303750  | 1.510156  |
| Mg9  | -1.732456 | -3.363454 | 0.776786  |
| Mg10 | 3.496711  | -1.095768 | 1.511347  |
| Mg11 | -4.225485 | -1.453979 | 0.337337  |
| Mg12 | 1.653713  | 3.655514  | -0.376553 |
| Mg13 | 3.661304  | -2.634546 | -1.122364 |

@mg13-isomer128 bp86/6-31G(d) Etot=-2601.135723 Eb=-11.08

|      |           |           |           |
|------|-----------|-----------|-----------|
| Mg1  | 5.520367  | -0.480290 | 0.572743  |
| Mg2  | 2.622534  | -1.674104 | 0.198229  |
| Mg3  | 3.958036  | 0.302837  | -1.880561 |
| Mg4  | -0.129321 | -0.858041 | 1.792627  |
| Mg5  | -0.378972 | -2.468183 | -0.729640 |
| Mg6  | 3.088128  | 1.349810  | 0.909089  |
| Mg7  | -2.983842 | -2.026775 | 0.872124  |
| Mg8  | 0.719021  | 0.460477  | -1.083315 |
| Mg9  | -5.314827 | -0.145305 | -0.274885 |
| Mg10 | -1.599313 | 2.541978  | -1.238323 |
| Mg11 | -2.547599 | -0.380662 | -1.684099 |
| Mg12 | -2.924542 | 1.149155  | 1.162555  |
| Mg13 | -0.029670 | 2.229102  | 1.383457  |

@mg13-isomer129 bp86/6-31G(d) Etot=-2601.135532 Eb=-11.07

|      |           |           |           |
|------|-----------|-----------|-----------|
| Mg1  | 1.143402  | 0.461655  | -1.545718 |
| Mg2  | -0.595478 | 2.307871  | 0.311713  |
| Mg3  | -1.869549 | -0.157680 | -1.253867 |
| Mg4  | -2.527013 | -2.386486 | 0.915875  |
| Mg5  | -0.005567 | -0.596411 | 1.281084  |
| Mg6  | 4.469570  | 0.631014  | -1.541755 |
| Mg7  | 5.377571  | 0.057774  | 1.243010  |
| Mg8  | -4.887883 | -0.553746 | -0.331785 |
| Mg9  | 2.533802  | 1.423812  | 1.010266  |
| Mg10 | 2.976293  | -1.548741 | 0.067613  |
| Mg11 | -0.000917 | -2.579567 | -1.098711 |
| Mg12 | -2.955008 | 0.623949  | 1.705746  |
| Mg13 | -3.659223 | 2.316555  | -0.763470 |

@mg13-isomer130 bp86/6-31G(d) Etot=-2601.135417 Eb=-11.06

|     |           |           |           |
|-----|-----------|-----------|-----------|
| Mg1 | -4.608986 | -0.487347 | -0.000104 |
| Mg2 | -2.192649 | 0.577203  | 1.600524  |
| Mg3 | -1.406509 | 3.391157  | 0.000022  |
| Mg4 | -2.192536 | 0.577238  | -1.600524 |
| Mg5 | 0.727602  | 1.856903  | 1.626453  |

|      |           |           |           |
|------|-----------|-----------|-----------|
| Mg6  | 0.574508  | -1.202988 | 1.628903  |
| Mg7  | -1.966785 | -2.081354 | 0.000013  |
| Mg8  | 0.727658  | 1.856910  | -1.626339 |
| Mg9  | 3.084992  | 0.250827  | 3.008481  |
| Mg10 | 0.574534  | -1.203020 | -1.628979 |
| Mg11 | 3.085062  | 0.250938  | -3.008466 |
| Mg12 | 0.659997  | -4.047024 | 0.000014  |
| Mg13 | 2.933112  | 0.260557  | 0.000002  |

@mg13-isomer131 bp86/6-31G(d) Etot=-2601.135129 Eb=-11.05

|      |           |           |           |
|------|-----------|-----------|-----------|
| Mg1  | 3.361045  | -0.123927 | -2.068368 |
| Mg2  | 4.777542  | -1.762717 | 0.111335  |
| Mg3  | 3.139134  | 0.860333  | 0.819913  |
| Mg4  | 1.806149  | -2.095543 | -0.011913 |
| Mg5  | -3.200336 | -0.450160 | 1.728075  |
| Mg6  | 0.410257  | 0.556534  | -0.955753 |
| Mg7  | 0.073081  | -0.102803 | 2.119325  |
| Mg8  | 1.057868  | 2.796913  | 1.728682  |
| Mg9  | -4.286237 | -2.437216 | -0.452466 |
| Mg10 | -1.212451 | -2.204838 | 0.135744  |
| Mg11 | -1.787530 | 2.227877  | 0.620511  |
| Mg12 | -2.808432 | 0.133197  | -1.433888 |
| Mg13 | -1.330091 | 2.602351  | -2.341197 |

@mg13-isomer132 bp86/6-31G(d) Etot=-2601.135110 Eb=-11.05

|      |           |           |           |
|------|-----------|-----------|-----------|
| Mg1  | 0.648025  | -0.794130 | -0.732755 |
| Mg2  | 0.662895  | 1.416115  | 1.744972  |
| Mg3  | 1.975716  | 2.143131  | -0.930478 |
| Mg4  | -1.736388 | -0.690723 | 1.253929  |
| Mg5  | 3.325022  | -0.126956 | 0.833224  |
| Mg6  | -1.176702 | 1.829184  | -0.836451 |
| Mg7  | -2.312728 | -1.016353 | -1.782920 |
| Mg8  | 3.360586  | -0.662115 | -2.119596 |
| Mg9  | -4.387877 | -2.381960 | 0.091835  |
| Mg10 | 2.820239  | -3.093679 | -0.076150 |
| Mg11 | -0.008542 | 4.276726  | 0.520464  |
| Mg12 | 1.014796  | -1.704336 | 2.252559  |
| Mg13 | -4.185042 | 0.805098  | -0.218634 |

@mg13-isomer133 bp86/6-31G(d) Etot=-2601.134535 Eb=-11.02

|      |           |           |           |
|------|-----------|-----------|-----------|
| Mg1  | -2.906950 | -1.783893 | 0.236526  |
| Mg2  | 0.180837  | 1.098232  | 1.428242  |
| Mg3  | 0.180747  | 0.688079  | -1.665158 |
| Mg4  | 0.180846  | -1.786015 | 0.236711  |
| Mg5  | -2.907213 | 1.096569  | 1.426613  |
| Mg6  | 2.757284  | 0.000037  | -0.000247 |
| Mg7  | 5.914981  | 0.000237  | -0.000594 |
| Mg8  | -1.374040 | -1.842566 | -2.397005 |
| Mg9  | -1.374064 | 2.997336  | -0.397344 |
| Mg10 | 9.256980  | -0.000316 | 0.000543  |
| Mg11 | -1.373745 | -1.154360 | 2.794345  |
| Mg12 | -5.628336 | -0.000382 | 0.000205  |
| Mg13 | -2.907328 | 0.687042  | -1.662836 |

@mg13-isomer134 bp86/6-31G(d) Etot=-2601.133448 Eb=-10.97

|     |           |           |           |
|-----|-----------|-----------|-----------|
| Mg1 | 0.830994  | 0.257228  | -1.494443 |
| Mg2 | 2.327122  | 0.706818  | 1.347002  |
| Mg3 | 4.125418  | 0.168691  | -1.180781 |
| Mg4 | 4.807481  | -1.190838 | 1.400453  |
| Mg5 | -0.774164 | -2.326491 | -1.487487 |
| Mg6 | -0.586824 | -0.811584 | 1.154695  |
| Mg7 | -0.351749 | 2.279327  | 0.666224  |
| Mg8 | -3.281418 | 0.987457  | 1.712079  |
| Mg9 | -3.608328 | -1.810494 | 0.346667  |

|      |           |           |           |
|------|-----------|-----------|-----------|
| Mg10 | -5.559126 | 0.469559  | -0.388841 |
| Mg11 | 2.085837  | -2.143030 | 0.087553  |
| Mg12 | 2.344026  | 2.877896  | -0.972191 |
| Mg13 | -2.359269 | 0.535462  | -1.190930 |

@mg13-isomer135 bp86/6-31G(d) Etot=-2601.133258 Eb=-10.96

|      |           |           |           |
|------|-----------|-----------|-----------|
| Mg1  | -0.610748 | 0.622805  | -1.990044 |
| Mg2  | -2.899196 | -1.398727 | -0.945341 |
| Mg3  | -2.086435 | 1.265306  | 0.994178  |
| Mg4  | -0.234409 | -2.343849 | -2.234893 |
| Mg5  | 2.324977  | -0.692803 | -1.122774 |
| Mg6  | -2.989029 | -1.431086 | 2.149118  |
| Mg7  | -5.128448 | 0.233191  | 0.565990  |
| Mg8  | 5.329178  | -1.134938 | 0.322553  |
| Mg9  | 4.173854  | 1.680507  | 0.248781  |
| Mg10 | -0.185187 | -1.372892 | 0.661451  |
| Mg11 | 2.698883  | -0.542404 | 1.860283  |
| Mg12 | -1.330925 | 3.353245  | -1.037320 |
| Mg13 | 0.937484  | 1.761643  | 0.528019  |

@mg13-isomer136 bp86/6-31G(d) Etot=-2601.133126 Eb=-10.95

|      |           |           |           |
|------|-----------|-----------|-----------|
| Mg1  | -2.067772 | 1.034717  | 1.304504  |
| Mg2  | -1.419305 | 2.895291  | -1.101163 |
| Mg3  | 0.118347  | -1.350776 | 1.261393  |
| Mg4  | -0.762361 | 0.050312  | -1.573279 |
| Mg5  | -4.002628 | 0.741774  | -1.214738 |
| Mg6  | -2.803733 | -1.907838 | 0.118252  |
| Mg7  | 3.288809  | -0.224106 | 1.884648  |
| Mg8  | 0.930174  | 1.678166  | 0.612510  |
| Mg9  | 2.355771  | -0.833079 | -0.957698 |
| Mg10 | 5.537392  | -0.758840 | -0.238631 |
| Mg11 | -0.253565 | -2.902982 | -1.363757 |
| Mg12 | 4.027828  | 1.835606  | -0.223461 |
| Mg13 | -4.948956 | -0.258246 | 1.491420  |

@mg13-isomer137 bp86/6-31G(d) Etot=-2601.132656 Eb=-10.93

|      |           |           |           |
|------|-----------|-----------|-----------|
| Mg1  | 0.136902  | 0.584667  | -1.658722 |
| Mg2  | 3.633187  | 1.352750  | -1.151427 |
| Mg3  | -0.704775 | -0.551370 | 1.189825  |
| Mg4  | -2.733642 | -2.794758 | 1.006209  |
| Mg5  | 2.319473  | -1.180601 | -0.048972 |
| Mg6  | -1.774213 | 2.206145  | 0.206491  |
| Mg7  | 5.612954  | -0.862142 | -0.461836 |
| Mg8  | -4.667771 | 1.865794  | -0.913696 |
| Mg9  | -2.900791 | -0.589990 | -1.244681 |
| Mg10 | -0.488717 | -2.515903 | -1.221607 |
| Mg11 | 4.198878  | 0.597332  | 1.767142  |
| Mg12 | -3.916042 | 0.134015  | 1.552179  |
| Mg13 | 1.284556  | 1.754062  | 0.979095  |

@mg13-isomer138 bp86/6-31G(d) Etot=-2601.132633 Eb=-10.93

|      |           |           |           |
|------|-----------|-----------|-----------|
| Mg1  | -0.018908 | -0.723519 | -0.644183 |
| Mg2  | -2.220775 | 1.646349  | -0.877162 |
| Mg3  | 0.924442  | 2.397825  | -1.027923 |
| Mg4  | -1.199934 | 4.241330  | 0.354763  |
| Mg5  | 2.462300  | 0.530469  | 0.930344  |
| Mg6  | 2.702063  | -0.107003 | -2.025842 |
| Mg7  | -2.504569 | -0.725441 | 1.130009  |
| Mg8  | 0.345435  | -1.304783 | 2.411277  |
| Mg9  | 5.041764  | -1.046720 | -0.164670 |
| Mg10 | -0.311294 | 1.631848  | 1.759503  |
| Mg11 | 2.447026  | -2.670514 | 0.121569  |
| Mg12 | -2.769774 | -1.175551 | -1.861190 |
| Mg13 | -4.897776 | -2.694288 | -0.106496 |

@mg13-isomer139 bp86/6-31G(d) Etot=-2601.132156 Eb=-10.91

|      |           |           |           |
|------|-----------|-----------|-----------|
| Mg1  | 4.371151  | 1.361383  | -1.269069 |
| Mg2  | -0.554038 | -0.765097 | -1.692794 |
| Mg3  | -4.870905 | 0.782807  | 0.289088  |
| Mg4  | 2.383525  | -1.173502 | -0.455538 |
| Mg5  | 5.420095  | -0.831607 | 0.502346  |
| Mg6  | 0.003989  | -0.139871 | 1.380232  |
| Mg7  | 3.220328  | 1.088970  | 1.493941  |
| Mg8  | -0.162335 | -3.096169 | 0.324654  |
| Mg9  | -3.583866 | -0.119901 | -2.383726 |
| Mg10 | 1.171942  | 1.732770  | -0.954856 |
| Mg11 | -2.764934 | -1.401098 | 0.472627  |
| Mg12 | -1.917830 | 1.700111  | -0.337458 |
| Mg13 | -2.717123 | 0.861204  | 2.630553  |

@mg13-isomer140 bp86/6-31G(d) Etot=-2601.131588 Eb=-10.88

|      |           |           |           |
|------|-----------|-----------|-----------|
| Mg1  | -0.866353 | 3.274596  | -2.851133 |
| Mg2  | 3.062986  | -0.000217 | 0.186993  |
| Mg3  | 0.802814  | -0.000170 | 2.243414  |
| Mg4  | -2.384012 | 1.595604  | -0.182980 |
| Mg5  | -2.384224 | -1.595261 | -0.183090 |
| Mg6  | -0.771468 | 2.744166  | 2.302463  |
| Mg7  | 6.215639  | -0.000211 | -0.188653 |
| Mg8  | -0.771888 | -2.744249 | 2.302270  |
| Mg9  | -1.046004 | 0.000131  | -2.438373 |
| Mg10 | -2.237749 | 0.000061  | 2.463289  |
| Mg11 | -0.866842 | -3.274338 | -2.851318 |
| Mg12 | 0.623450  | -1.663971 | -0.401496 |
| Mg13 | 0.623652  | 1.663858  | -0.401386 |

@mg13-isomer141 bp86/6-31G(d) Etot=-2601.130614 Eb=-10.83

|      |           |           |           |
|------|-----------|-----------|-----------|
| Mg1  | 1.130809  | -0.023755 | -1.702357 |
| Mg2  | 3.688962  | 0.704944  | -0.166193 |
| Mg3  | 0.260252  | -3.148910 | -1.120895 |
| Mg4  | 0.945287  | 1.306313  | 1.171825  |
| Mg5  | 6.386529  | 2.391157  | -0.125380 |
| Mg6  | -1.359236 | 1.647017  | -0.933749 |
| Mg7  | -4.068784 | 3.054444  | 0.102954  |
| Mg8  | -0.013795 | -3.579087 | 1.899415  |
| Mg9  | -1.633697 | -1.047575 | -2.489193 |
| Mg10 | -2.164194 | 1.474511  | 2.013080  |
| Mg11 | 2.103835  | -1.657176 | 0.905737  |
| Mg12 | -4.089904 | 0.002576  | -0.210370 |
| Mg13 | -1.186064 | -1.124458 | 0.655125  |

@mg13-isomer142 bp86/6-31G(d) Etot=-2601.129799 Eb=-10.79

|      |           |           |           |
|------|-----------|-----------|-----------|
| Mg1  | -4.055309 | -2.015635 | -1.153320 |
| Mg2  | -0.000003 | 1.325518  | -0.000058 |
| Mg3  | -2.986705 | 0.878480  | -1.321182 |
| Mg4  | 2.707578  | 2.434885  | -1.369504 |
| Mg5  | 5.148437  | 0.266020  | -0.661558 |
| Mg6  | 2.986656  | 0.878497  | 1.321176  |
| Mg7  | 2.156666  | -0.617993 | -1.233154 |
| Mg8  | -2.707520 | 2.434887  | 1.369524  |
| Mg9  | -0.864473 | -1.608539 | -1.330927 |
| Mg10 | 4.055293  | -2.015650 | 1.153359  |
| Mg11 | -2.156649 | -0.617986 | 1.233140  |
| Mg12 | 0.864459  | -1.608528 | 1.330900  |
| Mg13 | -5.148432 | 0.266044  | 0.661604  |

@mg13-isomer143 bp86/6-31G(d) Etot=-2601.129781 Eb=-10.79

|     |          |          |           |
|-----|----------|----------|-----------|
| Mg1 | 3.931435 | 1.760928 | 1.042286  |
| Mg2 | 0.680671 | 1.330613 | -0.000820 |

|      |           |           |           |
|------|-----------|-----------|-----------|
| Mg3  | -4.706282 | 1.158773  | -0.219186 |
| Mg4  | 2.632606  | -1.019652 | 1.064029  |
| Mg5  | -2.169692 | -3.024670 | -0.791250 |
| Mg6  | -3.745570 | -1.270647 | 1.395460  |
| Mg7  | -1.817835 | 2.899033  | -1.167344 |
| Mg8  | -2.117648 | 1.451825  | 1.532573  |
| Mg9  | -0.631594 | -1.353592 | 1.307974  |
| Mg10 | 5.770545  | -0.587662 | 0.240065  |
| Mg11 | 3.454316  | 0.248546  | -1.585735 |
| Mg12 | -1.970033 | -0.040383 | -1.340257 |
| Mg13 | 0.689081  | -1.553111 | -1.477795 |

@mg13-isomer144 bp86/6-31G(d) Etot=-2601.129636 Eb=-10.79

|      |           |           |           |
|------|-----------|-----------|-----------|
| Mg1  | -0.902805 | -1.484886 | 0.356368  |
| Mg2  | -3.724420 | 0.261133  | -0.492765 |
| Mg3  | -1.711819 | 1.388002  | 1.797779  |
| Mg4  | 2.255766  | -2.031633 | 0.862545  |
| Mg5  | -0.866801 | 1.748435  | -1.165515 |
| Mg6  | -3.539708 | -2.736567 | -0.530620 |
| Mg7  | -3.389038 | 3.260094  | -0.071808 |
| Mg8  | 1.237307  | 0.996353  | 1.063452  |
| Mg9  | 1.380029  | -0.399318 | -1.701236 |
| Mg10 | -0.228888 | -0.991059 | 3.175046  |
| Mg11 | 4.007250  | 0.335678  | -0.024279 |
| Mg12 | 7.079143  | 0.767949  | -0.792492 |
| Mg13 | -1.596015 | -1.114180 | -2.476476 |

@mg13-isomer145 bp86/6-31G(d) Etot=-2601.129491 Eb=-10.78

|      |           |           |           |
|------|-----------|-----------|-----------|
| Mg1  | -0.618604 | -1.046476 | 1.553025  |
| Mg2  | 4.134931  | 1.602403  | 0.399297  |
| Mg3  | 0.942544  | 1.188869  | -0.159390 |
| Mg4  | -5.131459 | -0.504620 | -1.015995 |
| Mg5  | 3.461809  | -0.422874 | -1.756550 |
| Mg6  | 5.575666  | -1.010268 | 0.402555  |
| Mg7  | 0.333840  | -1.788587 | -1.237025 |
| Mg8  | -2.072418 | 0.434924  | -1.074838 |
| Mg9  | -3.784525 | -0.240710 | 1.668699  |
| Mg10 | -1.159507 | 3.287189  | -1.189541 |
| Mg11 | -1.505937 | 2.093455  | 1.621277  |
| Mg12 | -2.694716 | -2.438964 | -0.318412 |
| Mg13 | 2.518375  | -1.154342 | 1.106898  |

@mg13-isomer146 bp86/6-31G(d) Etot=-2601.128746 Eb=-10.74

|      |           |           |           |
|------|-----------|-----------|-----------|
| Mg1  | 0.373388  | 1.448168  | 1.520517  |
| Mg2  | -0.867829 | 2.042663  | -1.226757 |
| Mg3  | 3.573088  | 1.247205  | 1.574588  |
| Mg4  | -2.801486 | 1.058415  | 1.138318  |
| Mg5  | 1.802170  | 0.473623  | -1.085854 |
| Mg6  | 4.258327  | -1.294831 | 0.011185  |
| Mg7  | -3.569669 | 0.227080  | -1.757593 |
| Mg8  | -5.845947 | 0.491755  | 0.261490  |
| Mg9  | -0.837596 | -1.012241 | -0.207051 |
| Mg10 | 4.707922  | 1.452640  | -1.277284 |
| Mg11 | 1.559444  | -2.758655 | -1.112941 |
| Mg12 | -3.899876 | -1.822257 | 0.491210  |
| Mg13 | 1.548064  | -1.553565 | 1.670173  |

@mg13-isomer147 bp86/6-31G(d) Etot=-2601.128080 Eb=-10.71

|     |           |           |           |
|-----|-----------|-----------|-----------|
| Mg1 | 3.805395  | 2.404908  | -1.143974 |
| Mg2 | -2.439328 | 2.760032  | -0.533081 |
| Mg3 | -0.115137 | -1.833057 | -2.252924 |
| Mg4 | 3.469377  | 1.061982  | 1.659283  |
| Mg5 | 2.484884  | -3.413886 | -0.920369 |
| Mg6 | 2.061692  | -0.360846 | -0.631155 |

|      |           |           |           |
|------|-----------|-----------|-----------|
| Mg7  | 0.443238  | 0.264002  | 2.458218  |
| Mg8  | -4.158629 | 0.386472  | 0.469570  |
| Mg9  | -1.115484 | 0.059278  | -0.045163 |
| Mg10 | 0.807360  | 2.422132  | 0.043495  |
| Mg11 | 0.009429  | -2.602087 | 0.851976  |
| Mg12 | -2.938052 | 0.195058  | -2.401546 |
| Mg13 | -2.314747 | -1.343987 | 2.445669  |

@mg13-isomer148 bp86/6-31G(d) Etot=-2601.128067 Eb=-10.71

|      |           |           |           |
|------|-----------|-----------|-----------|
| Mg1  | -0.620670 | 0.949263  | 1.537259  |
| Mg2  | -3.731140 | 1.804767  | 1.465200  |
| Mg3  | 2.294985  | -0.351680 | 1.135309  |
| Mg4  | -0.516268 | -2.324575 | 1.596962  |
| Mg5  | -0.017182 | -0.842196 | -1.087609 |
| Mg6  | -3.112383 | -1.009160 | 0.555730  |
| Mg7  | 1.231076  | 1.906517  | -0.770764 |
| Mg8  | 4.325105  | 1.881096  | 0.075680  |
| Mg9  | 3.481566  | -0.371868 | -1.749146 |
| Mg10 | -1.900418 | -3.273972 | -1.095574 |
| Mg11 | -4.955145 | 0.730500  | -1.142958 |
| Mg12 | -1.937650 | 1.749012  | -1.102706 |
| Mg13 | 5.458124  | -0.847704 | 0.582615  |

@mg13-isomer149 bp86/6-31G(d) Etot=-2601.128045 Eb=-10.71

|      |           |           |           |
|------|-----------|-----------|-----------|
| Mg1  | 2.844119  | 0.251752  | -1.407256 |
| Mg2  | -1.700178 | 0.541143  | 1.065531  |
| Mg3  | -4.484173 | -0.765954 | 0.260577  |
| Mg4  | 1.293322  | 1.373094  | 1.002318  |
| Mg5  | -3.419574 | 1.432630  | -1.575863 |
| Mg6  | 5.836961  | -0.569021 | -0.715766 |
| Mg7  | -2.203493 | -2.758580 | 1.212134  |
| Mg8  | 0.402772  | -1.490169 | 0.065997  |
| Mg9  | 3.550110  | -1.148863 | 1.259563  |
| Mg10 | 4.600560  | 1.656262  | 0.872744  |
| Mg11 | -2.183718 | -1.725285 | -1.632963 |
| Mg12 | -4.244943 | 2.185238  | 1.277901  |
| Mg13 | -0.291765 | 1.017752  | -1.684917 |

@mg13-isomer150 bp86/6-31G(d) Etot=-2601.127448 Eb=-10.68

|      |           |           |           |
|------|-----------|-----------|-----------|
| Mg1  | -1.725190 | 0.837276  | 1.133797  |
| Mg2  | -0.183359 | 1.901879  | 3.515724  |
| Mg3  | 1.326845  | -0.062882 | 1.818530  |
| Mg4  | 0.638983  | 2.960643  | 0.796572  |
| Mg5  | -3.006422 | -0.265851 | -1.434047 |
| Mg6  | 1.590514  | 3.799479  | -1.999380 |
| Mg7  | 2.730405  | -1.881598 | -0.102652 |
| Mg8  | -2.519462 | -2.282777 | 1.085496  |
| Mg9  | -0.794614 | 1.831280  | -1.840292 |
| Mg10 | -0.137844 | -1.219641 | -0.802855 |
| Mg11 | -5.077187 | -2.411916 | -0.764245 |
| Mg12 | 2.198140  | 0.916854  | -1.117409 |
| Mg13 | 4.959192  | -4.122746 | -0.289239 |

@mg13-isomer151 bp86/6-31G(d) Etot=-2601.126993 Eb=-10.66

|      |           |           |           |
|------|-----------|-----------|-----------|
| Mg1  | 1.104002  | -0.202508 | -1.761380 |
| Mg2  | -1.007970 | -1.782341 | 0.587571  |
| Mg3  | -2.657822 | 0.620694  | 1.759327  |
| Mg4  | -2.001719 | 0.525720  | -1.265508 |
| Mg5  | 0.263691  | 1.397477  | 0.838739  |
| Mg6  | 2.206735  | -1.080252 | 1.169779  |
| Mg7  | 5.494475  | 3.479377  | -0.121346 |
| Mg8  | 3.143710  | 1.369064  | -0.275527 |
| Mg9  | 1.206837  | -3.399510 | -0.814812 |
| Mg10 | -4.985013 | 1.456640  | -0.124137 |



|      |           |           |           |
|------|-----------|-----------|-----------|
| Mg11 | -2.484559 | 3.363526  | 0.322805  |
| Mg12 | 0.809740  | -3.592984 | 2.225171  |
| Mg13 | -1.092107 | -2.154902 | -2.540682 |

@mg13-isomer152 bp86/6-31G(d) Etot=-2601.126070 Eb=-10.61

|      |           |           |           |
|------|-----------|-----------|-----------|
| Mg1  | -0.916144 | -1.330692 | 0.884406  |
| Mg2  | -0.511360 | 1.995804  | 0.590675  |
| Mg3  | -2.896343 | 3.100024  | -1.086068 |
| Mg4  | -0.667950 | -2.320797 | -2.108121 |
| Mg5  | -3.464472 | -1.974543 | -0.754314 |
| Mg6  | 1.644424  | 0.125057  | 2.031569  |
| Mg7  | 2.799414  | 2.442138  | 0.348457  |
| Mg8  | 4.222445  | -0.337601 | 0.457904  |
| Mg9  | 7.204604  | -1.079243 | -0.466185 |
| Mg10 | 1.294618  | -0.161489 | -1.011077 |
| Mg11 | -3.454933 | 0.831596  | 0.790405  |
| Mg12 | -3.572975 | -1.829585 | 2.307013  |
| Mg13 | -1.681327 | 0.539331  | -1.984663 |

@mg13-isomer153 bp86/6-31G(d) Etot=-2601.125025 Eb=-10.56

|      |           |           |           |
|------|-----------|-----------|-----------|
| Mg1  | -5.259968 | -0.740910 | -0.033218 |
| Mg2  | -0.267908 | -0.000964 | 1.535741  |
| Mg3  | 3.140628  | -0.860770 | 1.267785  |
| Mg4  | 3.271837  | -2.918770 | -1.228122 |
| Mg5  | -2.142486 | -1.042373 | -0.695096 |
| Mg6  | -0.848798 | 1.695803  | -1.135024 |
| Mg7  | 4.850694  | 1.784040  | 1.252152  |
| Mg8  | -3.275497 | 1.230463  | 0.981646  |
| Mg9  | 4.438013  | 0.020641  | -1.220788 |
| Mg10 | -3.906549 | 1.226305  | -2.091059 |
| Mg11 | 1.954235  | 1.901346  | 0.266784  |
| Mg12 | 1.095459  | -0.742248 | -1.196085 |
| Mg13 | -3.049660 | -1.552564 | 2.295282  |

@mg13-isomer154 bp86/6-31G(d) Etot=-2601.124618 Eb=-10.54

|      |           |           |           |
|------|-----------|-----------|-----------|
| Mg1  | -3.255131 | 0.290138  | -1.834895 |
| Mg2  | 0.029461  | -1.369607 | 1.836140  |
| Mg3  | -4.661897 | 2.574263  | -0.282488 |
| Mg4  | -4.893747 | -0.355127 | 0.583639  |
| Mg5  | 5.467729  | -0.022903 | -0.982100 |
| Mg6  | 4.300140  | 1.809350  | 1.117068  |
| Mg7  | 2.783713  | -1.131336 | 0.289643  |
| Mg8  | 0.610508  | -3.404007 | -0.321994 |
| Mg9  | 1.109792  | 1.560498  | 1.230063  |
| Mg10 | -1.989112 | 1.137521  | 0.885717  |
| Mg11 | -2.331471 | -2.184375 | -0.018139 |
| Mg12 | 2.835850  | 1.500696  | -1.474928 |
| Mg13 | -0.005836 | -0.405111 | -1.027725 |

@mg13-isomer155 bp86/6-31G(d) Etot=-2601.124435 Eb=-10.53

|      |           |           |           |
|------|-----------|-----------|-----------|
| Mg1  | -0.485729 | -1.079530 | -0.974062 |
| Mg2  | -1.570652 | 1.649611  | 0.387806  |
| Mg3  | 0.561211  | -0.107176 | 1.791409  |
| Mg4  | 3.740265  | 1.007681  | 1.408655  |
| Mg5  | 1.335622  | 1.488188  | -0.717314 |
| Mg6  | -3.999978 | 2.461085  | -1.287728 |
| Mg7  | -2.476076 | -3.387590 | -0.878377 |
| Mg8  | 4.561332  | 1.068106  | -1.594439 |
| Mg9  | -2.331387 | -1.542035 | 1.557508  |
| Mg10 | -3.758578 | -0.582685 | -1.073576 |
| Mg11 | 2.840073  | -1.251890 | -0.431878 |
| Mg12 | -4.396801 | 1.052980  | 1.469286  |
| Mg13 | 5.980697  | -0.776745 | 0.342710  |

@mg13-isomer156 bp86/6-31G(d) Etot=-2601.124293 Eb=-10.53

|      |           |           |           |
|------|-----------|-----------|-----------|
| Mg1  | -1.145343 | 0.957743  | -0.828213 |
| Mg2  | -4.004658 | -0.030081 | -0.836598 |
| Mg3  | -3.586184 | 3.177984  | -0.917112 |
| Mg4  | 0.222459  | 0.662720  | 2.136720  |
| Mg5  | 0.992507  | -1.462809 | -0.275685 |
| Mg6  | 1.868816  | 1.654211  | -0.493605 |
| Mg7  | 3.914740  | -0.636429 | -1.527527 |
| Mg8  | 4.957219  | 2.024216  | -0.365935 |
| Mg9  | -1.703767 | -2.252110 | -1.681556 |
| Mg10 | -2.823987 | 1.596552  | 1.630723  |
| Mg11 | -1.871059 | -1.528725 | 1.204053  |
| Mg12 | 3.444883  | -0.067739 | 1.465854  |
| Mg13 | -0.265626 | -4.095532 | 0.488882  |

@mg13-isomer157 bp86/6-31G(d) Etot=-2601.122623 Eb=-10.45

|      |           |           |           |
|------|-----------|-----------|-----------|
| Mg1  | 3.825232  | 0.689422  | -0.251156 |
| Mg2  | 2.283401  | -1.956240 | -0.126157 |
| Mg3  | -0.589624 | -2.102206 | -1.588103 |
| Mg4  | 1.179059  | 2.063164  | 0.397669  |
| Mg5  | -3.051522 | -2.676669 | 0.389722  |
| Mg6  | -3.953811 | 0.152363  | 0.553575  |
| Mg7  | 1.507501  | 0.314034  | -2.111078 |
| Mg8  | -1.809750 | 2.249431  | 1.496780  |
| Mg9  | -3.950386 | 3.136508  | -0.433335 |
| Mg10 | -0.681407 | -0.643083 | 1.100452  |
| Mg11 | -1.461409 | 1.242339  | -1.294914 |
| Mg12 | 6.704047  | 1.186224  | 0.933707  |
| Mg13 | -0.001329 | -3.655287 | 0.932836  |

@mg13-isomer158 bp86/6-31G(d) Etot=-2601.119357 Eb=-10.29

|      |           |           |           |
|------|-----------|-----------|-----------|
| Mg1  | 0.066917  | 3.138533  | -0.430680 |
| Mg2  | 2.633490  | 1.608016  | -0.129613 |
| Mg3  | 4.617518  | -0.668497 | 0.071918  |
| Mg4  | -2.749174 | 1.860676  | -1.385217 |
| Mg5  | -0.046036 | 0.016333  | -1.486561 |
| Mg6  | 7.787087  | -0.823583 | -0.053300 |
| Mg7  | 1.865006  | -1.685607 | 0.270173  |
| Mg8  | -2.382942 | 2.730857  | 1.500080  |
| Mg9  | -3.588159 | -0.081868 | 0.916679  |
| Mg10 | -3.018566 | -1.273619 | -1.765181 |
| Mg11 | 0.002885  | 0.643721  | 1.513916  |
| Mg12 | -1.127088 | -2.219055 | 0.536652  |
| Mg13 | -4.060939 | -3.245906 | 0.441134  |

@mg13-isomer159 bp86/6-31G(d) Etot=-2601.118660 Eb=-10.26

|      |           |           |           |
|------|-----------|-----------|-----------|
| Mg1  | 0.420395  | -0.320991 | 1.518945  |
| Mg2  | -1.608458 | 2.377458  | 1.344009  |
| Mg3  | -2.794847 | -0.836835 | 1.106655  |
| Mg4  | -1.069461 | 0.515332  | -1.138652 |
| Mg5  | -3.680485 | -1.390537 | -1.850351 |
| Mg6  | 1.359422  | 2.289877  | 0.098316  |
| Mg7  | 4.277974  | 1.749797  | -1.270463 |
| Mg8  | 3.641337  | 0.219185  | 1.326901  |
| Mg9  | -4.184921 | 1.326111  | -0.496641 |
| Mg10 | 2.600680  | -2.724965 | 1.059187  |
| Mg11 | 4.903941  | -1.552611 | -0.796800 |
| Mg12 | 1.979969  | -0.479028 | -1.167351 |
| Mg13 | -5.845545 | -1.172794 | 0.266245  |

@mg13-isomer160 bp86/6-31G(d) Etot=-2601.118277 Eb=-10.24

|     |           |           |           |
|-----|-----------|-----------|-----------|
| Mg1 | -2.120756 | 0.587692  | 0.776149  |
| Mg2 | -0.220847 | -1.058948 | -1.220404 |
| Mg3 | -0.236283 | -2.097636 | 1.570796  |

|      |           |           |           |
|------|-----------|-----------|-----------|
| Mg4  | 1.071818  | 0.735960  | 1.082615  |
| Mg5  | -2.883908 | -2.410695 | 0.018627  |
| Mg6  | -3.651339 | 0.080000  | -1.856446 |
| Mg7  | 2.530706  | 3.358417  | 0.308069  |
| Mg8  | -5.229473 | -0.266280 | 0.668838  |
| Mg9  | 2.544124  | -1.912717 | 0.239031  |
| Mg10 | -4.443206 | 2.572750  | -0.183080 |
| Mg11 | 2.937265  | 0.774654  | -1.510822 |
| Mg12 | 4.384997  | 0.934190  | 1.041204  |
| Mg13 | 5.316902  | -1.297389 | -0.934577 |

@mg13-isomer161 bp86/6-31G(d) Etot=-2601.117815 Eb=-10.22

|      |           |           |           |
|------|-----------|-----------|-----------|
| Mg1  | 1.247955  | 1.784034  | 1.273443  |
| Mg2  | 2.529043  | -1.244259 | 1.340265  |
| Mg3  | 4.386047  | 1.246888  | 1.726224  |
| Mg4  | 2.723412  | 0.657430  | -1.099867 |
| Mg5  | -1.906680 | 1.366170  | 0.863894  |
| Mg6  | 5.176317  | -1.211972 | -0.083548 |
| Mg7  | 2.524552  | -2.449198 | -1.490098 |
| Mg8  | -3.079882 | -1.460325 | 0.301856  |
| Mg9  | -2.618176 | 0.593416  | -1.990585 |
| Mg10 | 0.095281  | 2.284602  | -1.518378 |
| Mg11 | -5.031335 | 0.930418  | -0.062047 |
| Mg12 | -6.012299 | -1.698990 | 1.361220  |
| Mg13 | -0.034236 | -0.798215 | -0.622379 |

@mg13-isomer162 bp86/6-31G(d) Etot=-2601.114070 Eb=-10.03

|      |           |           |           |
|------|-----------|-----------|-----------|
| Mg1  | -0.548543 | 1.372151  | 0.295342  |
| Mg2  | -3.449556 | 2.775672  | -0.228213 |
| Mg3  | 2.635299  | 1.502180  | -1.148177 |
| Mg4  | 4.968942  | 0.073042  | 0.232519  |
| Mg5  | 0.317934  | -0.761240 | -1.794462 |
| Mg6  | -2.754244 | -0.190580 | -1.168494 |
| Mg7  | -4.287037 | -2.323153 | 0.726766  |
| Mg8  | -1.103256 | -1.726642 | 0.866436  |
| Mg9  | 7.689990  | 0.457594  | 1.835348  |
| Mg10 | -3.394530 | 0.452996  | 1.799391  |
| Mg11 | 3.594938  | -1.216804 | -2.067325 |
| Mg12 | 2.002677  | -0.795224 | 0.754015  |
| Mg13 | -5.672612 | 0.380008  | -0.103146 |

@mg13-isomer163 bp86/6-31G(d) Etot=-2601.109823 Eb=-9.83

|      |           |           |           |
|------|-----------|-----------|-----------|
| Mg1  | -1.185901 | 0.543332  | -1.453378 |
| Mg2  | -3.879159 | 2.218442  | -1.393885 |
| Mg3  | 1.173944  | -1.639323 | -0.413771 |
| Mg4  | 3.596972  | -0.000321 | -0.000226 |
| Mg5  | 6.672047  | -0.000150 | -0.000018 |
| Mg6  | 9.983393  | 0.000214  | 0.000270  |
| Mg7  | -4.440231 | 0.856101  | 1.281450  |
| Mg8  | 1.174258  | 1.639130  | 0.413412  |
| Mg9  | -1.794660 | 2.465461  | 0.854672  |
| Mg10 | -1.185850 | -0.543261 | 1.453155  |
| Mg11 | -3.879064 | -2.218366 | 1.394173  |
| Mg12 | -1.795042 | -2.465327 | -0.854886 |
| Mg13 | -4.440706 | -0.855932 | -1.280969 |

@mg13-isomer164 bp86/6-31G(d) Etot=-2601.108000 Eb=-9.74

|     |           |           |           |
|-----|-----------|-----------|-----------|
| Mg1 | 2.114945  | -0.884676 | 1.126933  |
| Mg2 | 0.483242  | 1.479274  | -0.130702 |
| Mg3 | 5.020322  | -1.491294 | -0.769087 |
| Mg4 | 3.683349  | 1.378816  | -0.209597 |
| Mg5 | 1.793634  | -0.684517 | -1.854896 |
| Mg6 | -2.601103 | 1.441255  | -0.089956 |
| Mg7 | -5.379175 | 1.011107  | 1.604630  |

|      |           |           |           |
|------|-----------|-----------|-----------|
| Mg8  | -0.793330 | -1.345701 | -0.173121 |
| Mg9  | -3.886129 | -1.341362 | 0.010284  |
| Mg10 | -5.588968 | 1.002912  | -1.354143 |
| Mg11 | 5.361970  | -0.326500 | 1.967783  |
| Mg12 | 6.783953  | 0.971355  | -0.368402 |
| Mg13 | -6.992710 | -1.210670 | 0.240274  |

@mg13-isomer165 bp86/6-31G(d) Etot=-2601.083032 Eb=-8.54

|      |            |           |           |
|------|------------|-----------|-----------|
| Mg1  | -1.426775  | -0.363290 | -0.007378 |
| Mg2  | 0.495363   | -2.796239 | -0.471822 |
| Mg3  | -4.467717  | 0.012418  | -0.075350 |
| Mg4  | 0.576520   | -1.178736 | 2.149829  |
| Mg5  | 3.262435   | 2.496043  | -0.203984 |
| Mg6  | -7.645372  | 0.521275  | -0.129790 |
| Mg7  | -10.973630 | 0.922051  | -0.142916 |
| Mg8  | 1.449536   | 0.155631  | -0.703806 |
| Mg9  | 3.297779   | 0.431534  | 2.045713  |
| Mg10 | 3.310532   | -2.723329 | 0.849024  |
| Mg11 | 3.071562   | -2.570929 | -2.200990 |
| Mg12 | 4.486321   | 5.422820  | -0.445590 |
| Mg13 | 4.563445   | -0.329248 | -0.662938 |

@mg14-isomer01 bp86/6-31G(d) Etot=-2801.257306 Eb=-12.62

|      |           |           |           |
|------|-----------|-----------|-----------|
| Mg1  | -1.850545 | 1.576478  | 2.072646  |
| Mg2  | 3.386055  | -0.800910 | -1.133842 |
| Mg3  | -2.914137 | -0.556025 | -1.926258 |
| Mg4  | 1.663531  | -2.970421 | 0.169218  |
| Mg5  | -3.360022 | -0.897253 | 1.073350  |
| Mg6  | 2.929120  | -0.656987 | 1.890462  |
| Mg7  | 1.032200  | 1.743720  | 1.082327  |
| Mg8  | -3.982117 | 1.820057  | -0.102090 |
| Mg9  | 3.979527  | 1.828988  | 0.224290  |
| Mg10 | -1.084616 | 1.898189  | -1.048636 |
| Mg11 | 1.850830  | 1.723737  | -1.980222 |
| Mg12 | 0.189076  | -0.788881 | -1.606136 |
| Mg13 | -0.198506 | -0.960291 | 1.644930  |
| Mg14 | -1.640396 | -2.960402 | -0.360037 |

@mg14-isomer02 bp86/6-31G(d) Etot=-2801.257106 Eb=-12.61

|      |           |           |           |
|------|-----------|-----------|-----------|
| Mg1  | 3.290426  | 2.523828  | 0.140180  |
| Mg2  | 0.457469  | -1.384144 | 1.898501  |
| Mg3  | -2.733108 | -1.578180 | -2.237270 |
| Mg4  | 2.664205  | -2.852339 | 0.098823  |
| Mg5  | 0.218348  | -1.226944 | -1.189094 |
| Mg6  | 3.713446  | -0.261740 | -1.276616 |
| Mg7  | 0.260748  | 1.515339  | 0.791714  |
| Mg8  | -1.639662 | 1.216118  | -1.684484 |
| Mg9  | 3.285011  | -0.158445 | 1.702322  |
| Mg10 | -2.644959 | 2.760725  | 0.814311  |
| Mg11 | -2.084886 | 0.243314  | 2.420580  |
| Mg12 | -3.957114 | 0.076975  | 0.028789  |
| Mg13 | 1.314485  | 1.506971  | -2.077805 |
| Mg14 | -2.144409 | -2.381478 | 0.570048  |

@mg14-isomer03 bp86/6-31G(d) Etot=-2801.256413 Eb=-12.58

|     |           |           |           |
|-----|-----------|-----------|-----------|
| Mg1 | -1.334441 | -2.386780 | 0.843251  |
| Mg2 | 0.896238  | -0.648873 | 1.967560  |
| Mg3 | 2.970744  | 2.463897  | 0.233305  |
| Mg4 | -1.951898 | 0.292086  | 2.513166  |
| Mg5 | 0.307331  | -0.992779 | -1.257370 |
| Mg6 | 2.505106  | -2.716505 | 0.102886  |
| Mg7 | -2.526228 | -2.101599 | -1.922990 |
| Mg8 | 1.019118  | 1.725759  | -2.181366 |
| Mg9 | -3.836728 | -0.539782 | 0.267804  |

|      |           |           |           |
|------|-----------|-----------|-----------|
| Mg10 | -2.032932 | 0.929705  | -1.808297 |
| Mg11 | -3.204293 | 2.425055  | 0.676964  |
| Mg12 | -0.160745 | 1.927553  | 0.558451  |
| Mg13 | 3.454195  | -0.136244 | -1.481876 |
| Mg14 | 3.894534  | -0.241494 | 1.488512  |

@mg14-isomer04 bp86/6-31G(d) Etot=-2801.256387 Eb=-12.58

|      |           |           |           |
|------|-----------|-----------|-----------|
| Mg1  | 2.375080  | -2.644681 | -0.209682 |
| Mg2  | -3.760695 | -0.698641 | -0.409963 |
| Mg3  | 2.842542  | 2.384152  | -0.255347 |
| Mg4  | -1.869725 | 0.388953  | -2.526856 |
| Mg5  | 4.033556  | -0.267958 | -1.406265 |
| Mg6  | -1.034781 | -2.290053 | -0.976612 |
| Mg7  | -2.479671 | -2.319999 | 1.721229  |
| Mg8  | 3.402994  | -0.140765 | 1.518684  |
| Mg9  | -3.348677 | 2.322949  | -0.598916 |
| Mg10 | 0.293527  | -0.978819 | 1.352506  |
| Mg11 | -2.162902 | 0.759345  | 1.860072  |
| Mg12 | 0.980792  | 1.721642  | 2.267198  |
| Mg13 | 1.036877  | -0.292566 | -1.936003 |
| Mg14 | -0.308915 | 2.056440  | -0.400045 |

@mg14-isomer05 bp86/6-31G(d) Etot=-2801.256272 Eb=-12.57

|      |           |           |           |
|------|-----------|-----------|-----------|
| Mg1  | 1.511168  | -0.637292 | 1.536134  |
| Mg2  | -1.508569 | -0.626363 | -1.538839 |
| Mg3  | -0.009437 | 4.205175  | 0.015005  |
| Mg4  | -4.177318 | -0.247456 | 0.011994  |
| Mg5  | 2.255941  | 2.090431  | -0.003207 |
| Mg6  | -1.484247 | -0.633365 | 1.526361  |
| Mg7  | -0.003172 | -3.086007 | 0.000138  |
| Mg8  | 4.183402  | -0.241262 | -0.019822 |
| Mg9  | -3.020368 | -3.084760 | -0.001854 |
| Mg10 | 1.484059  | -0.617476 | -1.519857 |
| Mg11 | 3.028547  | -3.086511 | -0.006748 |
| Mg12 | -0.014227 | 1.956006  | -2.104850 |
| Mg13 | 0.008644  | 1.935478  | 2.099071  |
| Mg14 | -2.254424 | 2.073401  | 0.006476  |

@mg14-isomer06 bp86/6-31G(d) Etot=-2801.255308 Eb=-12.53

|      |           |           |           |
|------|-----------|-----------|-----------|
| Mg1  | -1.152717 | -0.546626 | -1.223339 |
| Mg2  | 1.152751  | -0.546579 | 1.223370  |
| Mg3  | -3.133673 | -2.825382 | -0.281210 |
| Mg4  | 1.647279  | -1.367346 | -1.952476 |
| Mg5  | 0.000071  | -3.237321 | 0.000000  |
| Mg6  | 3.133789  | -2.825253 | 0.281201  |
| Mg7  | -2.098724 | 2.393694  | -1.392857 |
| Mg8  | -0.000092 | 4.256822  | 0.000001  |
| Mg9  | -3.726561 | 0.248176  | 0.187766  |
| Mg10 | 1.010489  | 1.587582  | -1.285110 |
| Mg11 | -1.010556 | 1.587537  | 1.285107  |
| Mg12 | 2.098626  | 2.393787  | 1.392853  |
| Mg13 | -1.647220 | -1.367420 | 1.952469  |
| Mg14 | 3.726538  | 0.248330  | -0.187773 |

@mg14-isomer07 bp86/6-31G(d) Etot=-2801.255114 Eb=-12.52

|     |           |           |           |
|-----|-----------|-----------|-----------|
| Mg1 | -3.183785 | 0.406526  | -1.728827 |
| Mg2 | -0.836667 | -2.085197 | 1.392800  |
| Mg3 | 3.763188  | 1.549586  | 0.878320  |
| Mg4 | 1.616042  | -3.089469 | -0.572154 |
| Mg5 | 2.446538  | 1.050205  | -1.820437 |
| Mg6 | -2.686859 | -2.517795 | -1.021357 |
| Mg7 | -2.405207 | 2.430649  | 0.542954  |
| Mg8 | 0.757509  | 2.254340  | 0.589702  |
| Mg9 | -3.469845 | -0.357589 | 1.174007  |

|      |           |           |           |
|------|-----------|-----------|-----------|
| Mg10 | -0.590187 | 2.062081  | -2.157533 |
| Mg11 | -0.998587 | 0.690271  | 2.611264  |
| Mg12 | 1.797964  | -0.588878 | 1.668280  |
| Mg13 | -0.187538 | -0.580488 | -1.068544 |
| Mg14 | 3.977434  | -1.224243 | -0.488475 |

@mg14-isomer08 bp86/6-31G(d) Etot=-2801.254596 Eb=-12.50

|      |           |           |           |
|------|-----------|-----------|-----------|
| Mg1  | 0.018935  | -1.703563 | 1.869034  |
| Mg2  | -2.846646 | 2.698235  | 0.922872  |
| Mg3  | -3.883150 | 0.148884  | -0.482708 |
| Mg4  | -2.646496 | -0.140204 | 2.238674  |
| Mg5  | -0.115908 | 1.289413  | 1.254863  |
| Mg6  | 2.818956  | -0.234936 | 1.614773  |
| Mg7  | 4.152623  | 2.241941  | 0.312796  |
| Mg8  | 0.359722  | -0.895987 | -1.087887 |
| Mg9  | -1.352611 | 1.638404  | -1.546505 |
| Mg10 | 1.629150  | 1.906031  | -1.281684 |
| Mg11 | 3.811326  | -0.410919 | -1.250337 |
| Mg12 | 2.531884  | -2.991224 | 0.097221  |
| Mg13 | -2.280962 | -2.433570 | 0.031636  |
| Mg14 | -2.196823 | -1.112505 | -2.692748 |

@mg14-isomer09 bp86/6-31G(d) Etot=-2801.254551 Eb=-12.50

|      |           |           |           |
|------|-----------|-----------|-----------|
| Mg1  | -3.483428 | -0.994255 | 0.489235  |
| Mg2  | 0.365656  | -0.501204 | -1.142520 |
| Mg3  | -0.658178 | -1.275459 | 1.723929  |
| Mg4  | 2.282071  | -0.286110 | 1.609225  |
| Mg5  | -2.644110 | 0.950017  | 2.651559  |
| Mg6  | 3.743363  | -0.882708 | -0.962917 |
| Mg7  | -2.540166 | -0.330468 | -2.276652 |
| Mg8  | -3.230805 | 1.980335  | -0.189561 |
| Mg9  | 1.840340  | -3.144030 | 0.049573  |
| Mg10 | -0.779573 | 2.188130  | -1.929360 |
| Mg11 | 2.303190  | 1.901946  | -1.088214 |
| Mg12 | -0.221160 | 1.731119  | 1.006189  |
| Mg13 | -1.506648 | -2.892543 | -0.773404 |
| Mg14 | 4.529448  | 1.555230  | 0.832918  |

@mg14-isomer10 bp86/6-31G(d) Etot=-2801.254308 Eb=-12.49

|      |           |           |           |
|------|-----------|-----------|-----------|
| Mg1  | 0.866136  | 1.462691  | 2.528947  |
| Mg2  | 0.422629  | -1.434458 | -1.459815 |
| Mg3  | -4.176226 | -0.899899 | 0.084443  |
| Mg4  | 2.728399  | -2.733996 | 0.161839  |
| Mg5  | -2.236526 | 0.373529  | 2.113268  |
| Mg6  | 3.345116  | -0.028915 | 1.554799  |
| Mg7  | 2.577965  | 2.478825  | -0.108398 |
| Mg8  | -3.541538 | 2.076294  | -0.144903 |
| Mg9  | 3.372802  | -0.159019 | -1.487153 |
| Mg10 | -0.465846 | 1.767861  | -0.091036 |
| Mg11 | 0.918982  | 1.240654  | -2.648806 |
| Mg12 | -2.205902 | 0.053336  | -2.097882 |
| Mg13 | 0.345240  | -1.269788 | 1.533165  |
| Mg14 | -1.951231 | -2.927114 | 0.061532  |

@mg14-isomer11 bp86/6-31G(d) Etot=-2801.254243 Eb=-12.48

|     |           |           |           |
|-----|-----------|-----------|-----------|
| Mg1 | -1.794201 | 1.137999  | 2.741262  |
| Mg2 | 0.119002  | -0.802123 | -1.425332 |
| Mg3 | 2.251300  | 1.413918  | -1.886997 |
| Mg4 | -3.046573 | -0.227400 | -1.977666 |
| Mg5 | 0.378504  | 1.735542  | 0.692010  |
| Mg6 | -3.495903 | -0.677221 | 0.989003  |
| Mg7 | -0.459880 | -1.323563 | 1.571922  |
| Mg8 | 3.656986  | 1.935073  | 0.721779  |
| Mg9 | -2.035072 | -2.837736 | -0.674483 |

|      |           |           |           |
|------|-----------|-----------|-----------|
| Mg10 | 2.435238  | -0.540084 | 1.975717  |
| Mg11 | 1.792904  | -3.056745 | -0.099900 |
| Mg12 | 3.918267  | -0.875044 | -0.680905 |
| Mg13 | -2.906721 | 2.220891  | 0.158156  |
| Mg14 | -0.813852 | 1.896493  | -2.104565 |

@mg14-isomer12 bp86/6-31G(d) Etot=-2801.253784 Eb=-12.46

|      |           |           |           |
|------|-----------|-----------|-----------|
| Mg1  | -1.239624 | -2.304875 | 0.909523  |
| Mg2  | 0.329666  | -0.886865 | -1.317673 |
| Mg3  | -2.898750 | 2.604611  | 0.917678  |
| Mg4  | 3.262144  | 1.629020  | 1.606858  |
| Mg5  | -1.443366 | 0.411622  | 2.488157  |
| Mg6  | 3.840611  | -1.041648 | 0.100608  |
| Mg7  | 1.816080  | -3.360261 | -0.178632 |
| Mg8  | -3.774245 | -0.417107 | 0.651690  |
| Mg9  | 3.206987  | 1.541702  | -1.378339 |
| Mg10 | -2.739221 | -2.078487 | -1.692681 |
| Mg11 | 0.438781  | 1.764043  | -2.664922 |
| Mg12 | -2.259607 | 0.929329  | -1.601573 |
| Mg13 | 1.256474  | -0.726275 | 1.769829  |
| Mg14 | 0.204071  | 1.935191  | 0.389477  |

@mg14-isomer13 bp86/6-31G(d) Etot=-2801.253639 Eb=-12.46

|      |           |           |           |
|------|-----------|-----------|-----------|
| Mg1  | 1.742918  | -0.397585 | 2.432228  |
| Mg2  | 2.520211  | 2.433104  | 1.561008  |
| Mg3  | -3.309569 | -0.035976 | -1.424515 |
| Mg4  | 3.020371  | -1.093399 | -2.332176 |
| Mg5  | -0.677138 | -1.881541 | 1.291972  |
| Mg6  | 3.946824  | -0.025938 | 0.385359  |
| Mg7  | -0.344840 | 1.218444  | 0.995954  |
| Mg8  | -3.269443 | -2.838689 | -0.110361 |
| Mg9  | 1.953940  | 1.594358  | -1.291585 |
| Mg10 | -3.401677 | -0.181203 | 1.590107  |
| Mg11 | -0.986862 | 2.007193  | -1.843592 |
| Mg12 | -3.303403 | 2.621511  | 0.189885  |
| Mg13 | 2.094747  | -2.562135 | 0.121826  |
| Mg14 | 0.013921  | -0.858144 | -1.566110 |

@mg14-isomer14 bp86/6-31G(d) Etot=-2801.253480 Eb=-12.45

|      |           |           |           |
|------|-----------|-----------|-----------|
| Mg1  | 0.852813  | -1.179732 | -1.738379 |
| Mg2  | -1.525049 | 0.402551  | 1.853901  |
| Mg3  | 0.572544  | 2.264130  | 0.723186  |
| Mg4  | -3.775443 | 0.686263  | -0.399917 |
| Mg5  | 2.314767  | 1.529556  | -1.835373 |
| Mg6  | -2.314168 | -1.525112 | -1.837564 |
| Mg7  | -0.571238 | -2.267644 | 0.720957  |
| Mg8  | 3.775622  | -0.685186 | -0.402774 |
| Mg9  | -3.566656 | -1.881266 | 1.049807  |
| Mg10 | 2.297937  | -3.185299 | 0.343525  |
| Mg11 | 1.525743  | -0.408950 | 1.856481  |
| Mg12 | 3.564892  | 1.878303  | 1.053915  |
| Mg13 | -0.855823 | 1.189403  | -1.740454 |
| Mg14 | -2.295942 | 3.182983  | 0.352688  |

@mg14-isomer15 bp86/6-31G(d) Etot=-2801.252357 Eb=-12.40

|     |           |           |           |
|-----|-----------|-----------|-----------|
| Mg1 | -1.666103 | 0.037144  | 1.815925  |
| Mg2 | 3.089708  | -1.620450 | -1.550899 |
| Mg3 | -3.914727 | 1.505634  | 0.319923  |
| Mg4 | 3.060956  | 1.546445  | -1.648450 |
| Mg5 | -3.951766 | -1.487507 | 0.429344  |
| Mg6 | 2.661876  | 2.678787  | 1.165605  |
| Mg7 | 4.108313  | 0.044615  | 0.787185  |
| Mg8 | -6.553267 | 0.019409  | -0.211931 |
| Mg9 | 2.708801  | -2.583726 | 1.328208  |

|      |           |           |           |
|------|-----------|-----------|-----------|
| Mg10 | -2.208485 | -0.085268 | -1.612241 |
| Mg11 | 1.360643  | 0.069372  | 2.263195  |
| Mg12 | 0.289494  | -1.568715 | -0.122727 |
| Mg13 | 0.263768  | 1.539826  | -0.223962 |
| Mg14 | 0.750789  | -0.095568 | -2.739174 |

@mg14-isomer16 bp86/6-31G(d) Etot=-2801.251831 Eb=-12.37

|      |           |           |           |
|------|-----------|-----------|-----------|
| Mg1  | 3.077999  | -1.559227 | -0.780588 |
| Mg2  | -0.372100 | 0.003993  | -0.063000 |
| Mg3  | 0.158886  | 2.557107  | -1.273958 |
| Mg4  | -2.911570 | 1.569496  | -1.410834 |
| Mg5  | 3.058336  | 1.557062  | -0.807585 |
| Mg6  | -2.895604 | -1.577284 | -1.410965 |
| Mg7  | 0.176124  | -2.573290 | -1.226486 |
| Mg8  | 3.693244  | 0.023925  | 1.778683  |
| Mg9  | -4.052787 | -0.007470 | 1.013970  |
| Mg10 | 1.260658  | -1.763760 | 1.807660  |
| Mg11 | -1.875930 | -2.045280 | 1.662488  |
| Mg12 | 1.251728  | 1.796827  | 1.783302  |
| Mg13 | 1.320541  | -0.024920 | -2.742857 |
| Mg14 | -1.889524 | 2.042823  | 1.670170  |

@mg14-isomer17 bp86/6-31G(d) Etot=-2801.251769 Eb=-12.37

|      |           |           |           |
|------|-----------|-----------|-----------|
| Mg1  | -1.684443 | -0.187008 | -2.458529 |
| Mg2  | 0.196882  | -2.404717 | -1.269496 |
| Mg3  | 1.645352  | 0.660414  | 2.193127  |
| Mg4  | -2.818762 | -2.137048 | -0.337036 |
| Mg5  | 0.783553  | 0.509764  | -0.885110 |
| Mg6  | 3.203096  | -1.366682 | -1.855533 |
| Mg7  | -1.404846 | 2.744883  | -1.359410 |
| Mg8  | 1.921583  | 3.186074  | 0.050237  |
| Mg9  | -3.679311 | 0.939705  | -0.504200 |
| Mg10 | -1.159706 | 1.445491  | 1.380191  |
| Mg11 | -3.358215 | -0.578339 | 2.165315  |
| Mg12 | -0.408571 | -1.559694 | 1.604165  |
| Mg13 | 3.937339  | 0.769362  | 0.221881  |
| Mg14 | 2.826049  | -2.022206 | 1.054397  |

@mg14-isomer18 bp86/6-31G(d) Etot=-2801.251277 Eb=-12.35

|      |           |           |           |
|------|-----------|-----------|-----------|
| Mg1  | -2.375454 | 0.768440  | 1.614625  |
| Mg2  | 0.720897  | -0.047494 | -1.559310 |
| Mg3  | 4.105869  | 0.301869  | 1.498122  |
| Mg4  | -0.163991 | -2.619536 | 0.000426  |
| Mg5  | 0.722133  | -0.045762 | 1.558783  |
| Mg6  | -3.167267 | -1.742721 | 0.000501  |
| Mg7  | -3.498691 | 3.141397  | -0.000265 |
| Mg8  | 2.712284  | 2.555322  | 0.000286  |
| Mg9  | -1.598272 | -1.865753 | -2.627316 |
| Mg10 | -0.338202 | 2.453083  | -0.001302 |
| Mg11 | -2.377716 | 0.766975  | -1.613833 |
| Mg12 | 4.105296  | 0.302915  | -1.498699 |
| Mg13 | -1.598162 | -1.864805 | 2.628331  |
| Mg14 | 2.751277  | -2.103930 | -0.000348 |

@mg14-isomer19 bp86/6-31G(d) Etot=-2801.250876 Eb=-12.33

|     |           |           |           |
|-----|-----------|-----------|-----------|
| Mg1 | 0.841640  | -0.383329 | -1.326559 |
| Mg2 | 1.090057  | 0.295523  | 1.720485  |
| Mg3 | -3.207967 | -2.353979 | 0.831049  |
| Mg4 | 2.906797  | -2.334489 | 0.414499  |
| Mg5 | -1.780621 | -1.933730 | -1.827059 |
| Mg6 | 3.986245  | 0.020489  | -1.510419 |
| Mg7 | 2.545770  | 2.528249  | -0.236460 |
| Mg8 | -3.355334 | 0.387392  | -0.634994 |
| Mg9 | 4.215636  | 0.375443  | 1.403921  |



|      |           |           |           |
|------|-----------|-----------|-----------|
| Mg10 | -0.595887 | 2.114130  | -0.143935 |
| Mg11 | -3.221461 | 2.733973  | 1.256757  |
| Mg12 | -1.870450 | 0.078333  | 2.072941  |
| Mg13 | -1.386905 | 0.862364  | -2.890339 |
| Mg14 | -0.167519 | -2.390369 | 0.870114  |

@mg14-isomer20 bp86/6-31G(d) Etot=-2801.250674 Eb=-12.32

|      |           |           |           |
|------|-----------|-----------|-----------|
| Mg1  | -1.052320 | -2.467506 | 0.562392  |
| Mg2  | 1.950612  | 1.446504  | -0.962093 |
| Mg3  | -2.491502 | 0.230757  | 1.709512  |
| Mg4  | 3.877250  | -0.234540 | 1.061135  |
| Mg5  | -4.122824 | -2.262311 | 0.791419  |
| Mg6  | 2.155600  | -2.681871 | 0.323154  |
| Mg7  | 0.361985  | -1.069741 | -1.794308 |
| Mg8  | -3.258285 | 2.326801  | -0.425793 |
| Mg9  | 3.573988  | -1.062674 | -1.859342 |
| Mg10 | -2.773657 | -0.501932 | -1.323235 |
| Mg11 | -0.891104 | 1.698059  | -2.324064 |
| Mg12 | -0.415857 | 2.496345  | 0.697814  |
| Mg13 | 0.653343  | -0.213800 | 1.677015  |
| Mg14 | 2.432771  | 2.295909  | 1.866394  |

@mg14-isomer21 bp86/6-31G(d) Etot=-2801.250613 Eb=-12.32

|      |           |           |           |
|------|-----------|-----------|-----------|
| Mg1  | 1.221981  | 0.854023  | -1.883352 |
| Mg2  | 0.833757  | 0.202624  | 1.007160  |
| Mg3  | -4.035524 | 0.582355  | -0.541253 |
| Mg4  | 1.306705  | 3.753023  | 0.089503  |
| Mg5  | -1.375348 | 2.196873  | -0.528484 |
| Mg6  | 3.606736  | 1.872668  | -0.154935 |
| Mg7  | 2.255840  | -3.849841 | 0.547488  |
| Mg8  | -2.707529 | -2.216074 | -0.294436 |
| Mg9  | 3.378396  | -1.160081 | -0.316260 |
| Mg10 | 0.336766  | -2.047298 | -1.111216 |
| Mg11 | -0.455344 | -2.722083 | 1.679665  |
| Mg12 | -2.057949 | -0.028913 | 1.739306  |
| Mg13 | -1.677716 | -0.106440 | -2.483447 |
| Mg14 | -0.630771 | 2.669163  | 2.250262  |

@mg14-isomer22 bp86/6-31G(d) Etot=-2801.250541 Eb=-12.32

|      |           |           |           |
|------|-----------|-----------|-----------|
| Mg1  | 2.150244  | -0.586787 | 1.948709  |
| Mg2  | -2.994679 | 1.926107  | -0.994270 |
| Mg3  | 1.813564  | -0.099373 | -1.534645 |
| Mg4  | -2.505265 | -3.255614 | -1.272451 |
| Mg5  | 4.377185  | 0.307923  | 0.171188  |
| Mg6  | -0.039962 | -2.096725 | 0.197585  |
| Mg7  | -0.945594 | -0.602920 | 2.756735  |
| Mg8  | 2.597018  | 2.766332  | -0.128007 |
| Mg9  | -3.145421 | -0.835533 | 0.345424  |
| Mg10 | -0.125727 | 1.356720  | 0.784057  |
| Mg11 | -3.042305 | 1.672344  | 2.045230  |
| Mg12 | -0.033265 | 2.377264  | -1.945704 |
| Mg13 | 3.214353  | -2.489901 | -0.257110 |
| Mg14 | -1.320146 | -0.439836 | -2.116742 |

@mg14-isomer23 bp86/6-31G(d) Etot=-2801.250126 Eb=-12.30

|     |           |           |           |
|-----|-----------|-----------|-----------|
| Mg1 | -1.896184 | 0.016373  | -2.825107 |
| Mg2 | 0.642069  | -0.032094 | 1.554024  |
| Mg3 | -1.802200 | 2.025908  | 1.813604  |
| Mg4 | 3.425686  | 1.526089  | 0.333609  |
| Mg5 | -1.677274 | 2.566189  | -1.269559 |
| Mg6 | 4.198129  | -0.814426 | -1.523025 |
| Mg7 | 1.912028  | -2.408703 | -0.322741 |
| Mg8 | -3.913444 | -2.701383 | 0.175290  |
| Mg9 | 4.097533  | -1.240908 | 1.460378  |

|      |           |           |           |
|------|-----------|-----------|-----------|
| Mg10 | -3.423411 | 0.388780  | -0.186794 |
| Mg11 | -1.018445 | -1.766346 | -0.468602 |
| Mg12 | -2.197362 | -0.927360 | 2.257203  |
| Mg13 | 0.815168  | 0.463582  | -1.506171 |
| Mg14 | 0.837708  | 2.904300  | 0.507892  |

@mg14-isomer24 bp86/6-31G(d) Etot=-2801.249375 Eb=-12.26

|      |           |           |           |
|------|-----------|-----------|-----------|
| Mg1  | -3.784615 | 0.376645  | 0.063921  |
| Mg2  | 0.086750  | -1.066898 | -1.045694 |
| Mg3  | 4.047032  | -0.344947 | -0.761735 |
| Mg4  | 1.996903  | -0.203292 | 1.600282  |
| Mg5  | 1.775246  | 1.266095  | -2.017324 |
| Mg6  | -2.549434 | 2.828848  | 1.157965  |
| Mg7  | -2.759420 | -2.380036 | 0.459285  |
| Mg8  | -1.318735 | 1.477734  | -1.698769 |
| Mg9  | -1.341710 | 0.106274  | 1.968973  |
| Mg10 | -2.716560 | -1.152366 | -2.368685 |
| Mg11 | 0.061994  | -2.547835 | 1.555205  |
| Mg12 | 2.666367  | -2.938482 | -0.064579 |
| Mg13 | 0.372381  | 2.324990  | 0.622417  |
| Mg14 | 3.463802  | 2.253271  | 0.528738  |

@mg14-isomer25 bp86/6-31G(d) Etot=-2801.247950 Eb=-12.20

|      |           |           |           |
|------|-----------|-----------|-----------|
| Mg1  | -1.273752 | 1.200021  | 2.089299  |
| Mg2  | 1.514352  | -1.693230 | -1.656266 |
| Mg3  | 3.366979  | -1.298678 | 0.681334  |
| Mg4  | -3.342446 | 1.801994  | -0.169254 |
| Mg5  | 1.627861  | 1.249507  | 1.208653  |
| Mg6  | -0.633459 | 3.405614  | 0.021900  |
| Mg7  | -3.151934 | -1.053930 | 0.902777  |
| Mg8  | 0.061144  | -1.506824 | 1.874754  |
| Mg9  | -3.224251 | -0.705165 | -2.006257 |
| Mg10 | -0.515321 | 0.380002  | -0.810018 |
| Mg11 | -1.204324 | -2.742827 | -0.688536 |
| Mg12 | 1.512498  | -3.884670 | 0.449884  |
| Mg13 | 2.319698  | 3.837298  | -0.445481 |
| Mg14 | 2.942956  | 1.010887  | -1.452791 |

@mg14-isomer26 bp86/6-31G(d) Etot=-2801.247926 Eb=-12.20

|      |           |           |           |
|------|-----------|-----------|-----------|
| Mg1  | -1.411228 | 1.585684  | -0.667277 |
| Mg2  | 3.628730  | 0.126125  | 0.272047  |
| Mg3  | -2.710033 | -1.329619 | 0.628833  |
| Mg4  | 1.060620  | 2.446967  | 0.978739  |
| Mg5  | -3.792948 | 0.103727  | -1.936649 |
| Mg6  | -1.572793 | 1.256428  | 2.441683  |
| Mg7  | 3.565035  | 3.064781  | -0.639412 |
| Mg8  | -0.443715 | -3.343506 | 0.344191  |
| Mg9  | 1.429938  | 0.966497  | -1.840667 |
| Mg10 | 2.120998  | -2.052362 | -1.283183 |
| Mg11 | -0.852147 | -1.199839 | -1.937160 |
| Mg12 | 2.727956  | -2.451379 | 1.653948  |
| Mg13 | -4.160483 | 1.348128  | 0.866153  |
| Mg14 | 0.410070  | -0.521633 | 1.118753  |

@mg14-isomer27 bp86/6-31G(d) Etot=-2801.247769 Eb=-12.19

|     |           |           |           |
|-----|-----------|-----------|-----------|
| Mg1 | 1.845603  | 1.617734  | -3.153954 |
| Mg2 | -4.086543 | -2.169343 | 0.699324  |
| Mg3 | 2.846064  | 0.912428  | 2.574939  |
| Mg4 | 0.587040  | -0.768358 | 1.303506  |
| Mg5 | 2.652985  | 1.584348  | -0.299925 |
| Mg6 | 1.563539  | -1.105110 | -1.815983 |
| Mg7 | -2.680695 | 2.989118  | 0.238901  |
| Mg8 | 0.112563  | 2.235945  | 1.561291  |
| Mg9 | -1.380712 | -2.016255 | -0.824102 |

|      |           |           |           |
|------|-----------|-----------|-----------|
| Mg10 | -0.523247 | 1.060280  | -1.221902 |
| Mg11 | -3.668700 | 0.162300  | -1.230193 |
| Mg12 | -2.427874 | 0.203618  | 1.541729  |
| Mg13 | 3.643741  | -1.275457 | 0.558325  |
| Mg14 | 1.516236  | -3.431248 | 0.068043  |

@mg14-isomer28 bp86/6-31G(d) Etot=-2801.247394 Eb=-12.18

|      |           |           |           |
|------|-----------|-----------|-----------|
| Mg1  | -0.558776 | 1.864193  | -1.555112 |
| Mg2  | -1.018235 | -1.036004 | -0.812329 |
| Mg3  | -3.512226 | -2.483686 | 0.119873  |
| Mg4  | 1.855402  | -2.113692 | -0.253324 |
| Mg5  | -3.518884 | 0.721185  | -0.190689 |
| Mg6  | 2.487607  | 1.323062  | -0.905965 |
| Mg7  | 0.930035  | 3.413105  | 0.696852  |
| Mg8  | -2.275247 | 3.707485  | 0.203631  |
| Mg9  | 4.465449  | -0.716621 | 0.310459  |
| Mg10 | -0.958555 | 1.087802  | 1.458527  |
| Mg11 | 2.002296  | 0.516220  | 1.850884  |
| Mg12 | -0.106724 | -1.783489 | 1.994296  |
| Mg13 | 0.984279  | -0.444063 | -2.926968 |
| Mg14 | -0.776420 | -4.055495 | 0.009865  |

@mg14-isomer29 bp86/6-31G(d) Etot=-2801.247150 Eb=-12.16

|      |           |           |           |
|------|-----------|-----------|-----------|
| Mg1  | 0.687074  | 1.801952  | 1.361934  |
| Mg2  | -0.509758 | -0.565518 | -1.678290 |
| Mg3  | 2.293812  | -0.881289 | 1.282707  |
| Mg4  | -2.940742 | -1.690336 | 0.454698  |
| Mg5  | 3.865592  | 1.679248  | 1.264165  |
| Mg6  | -5.455200 | 0.061925  | 0.380339  |
| Mg7  | -2.407091 | 1.244451  | 1.004455  |
| Mg8  | 4.836710  | -0.413085 | -0.590030 |
| Mg9  | -3.440057 | 0.665167  | -1.815524 |
| Mg10 | 2.099729  | 1.122544  | -1.288757 |
| Mg11 | -0.727899 | 2.355670  | -1.369602 |
| Mg12 | 2.294866  | -1.907058 | -1.715585 |
| Mg13 | -0.628589 | -0.751700 | 2.456382  |
| Mg14 | 0.031551  | -2.721972 | 0.253109  |

@mg14-isomer30 bp86/6-31G(d) Etot=-2801.247096 Eb=-12.16

|      |           |           |           |
|------|-----------|-----------|-----------|
| Mg1  | 0.000338  | -1.850218 | -1.781024 |
| Mg2  | -0.002303 | 0.164853  | 0.819713  |
| Mg3  | 0.001306  | 1.219541  | -2.233418 |
| Mg4  | 1.494318  | 2.901450  | 0.139634  |
| Mg5  | -0.000972 | -4.709110 | -0.302529 |
| Mg6  | 4.378305  | 2.165723  | -0.014010 |
| Mg7  | -2.607060 | -0.184410 | -1.054404 |
| Mg8  | 1.738787  | -2.494423 | 0.804124  |
| Mg9  | 2.921931  | 0.195938  | 1.876721  |
| Mg10 | -1.744528 | -2.495981 | 0.799510  |
| Mg11 | -2.925256 | 0.194724  | 1.875645  |
| Mg12 | -4.372338 | 2.173929  | -0.013001 |
| Mg13 | 2.605611  | -0.189037 | -1.053522 |
| Mg14 | -1.488138 | 2.907020  | 0.136560  |

@mg14-isomer31 bp86/6-31G(d) Etot=-2801.246231 Eb=-12.12

|     |           |           |           |
|-----|-----------|-----------|-----------|
| Mg1 | 1.262401  | -2.995285 | -0.263851 |
| Mg2 | -1.614540 | 0.464392  | 1.230470  |
| Mg3 | 2.317099  | 1.545153  | -1.290213 |
| Mg4 | -3.723228 | 2.427320  | -0.144706 |
| Mg5 | 2.827937  | -1.325564 | -2.256100 |
| Mg6 | -3.080760 | -0.112660 | -1.657723 |
| Mg7 | -1.933788 | -2.523379 | 0.219464  |
| Mg8 | 4.155628  | 2.059521  | 1.164650  |
| Mg9 | -4.372018 | -0.735927 | 1.006776  |

|      |           |           |           |
|------|-----------|-----------|-----------|
| Mg10 | 3.153374  | -0.808973 | 0.735899  |
| Mg11 | 0.516201  | -1.463945 | 2.253153  |
| Mg12 | 1.187525  | 1.484815  | 1.560788  |
| Mg13 | 0.005334  | -0.468652 | -1.558910 |
| Mg14 | -0.701164 | 2.453184  | -0.999697 |

@mg14-isomer32 bp86/6-31G(d) Etot=-2801.245807 Eb=-12.10

|      |           |           |           |
|------|-----------|-----------|-----------|
| Mg1  | 1.262195  | 2.012918  | -0.454440 |
| Mg2  | -0.012206 | -2.362792 | 1.845050  |
| Mg3  | -3.642381 | 0.128280  | -1.340477 |
| Mg4  | 2.445508  | -2.569162 | -0.069154 |
| Mg5  | -0.703212 | 0.789644  | -2.235523 |
| Mg6  | 3.790946  | 0.133849  | -0.466320 |
| Mg7  | 3.566322  | 2.620792  | 1.346624  |
| Mg8  | -2.268960 | 2.804472  | -0.335421 |
| Mg9  | 2.063764  | -0.040525 | 1.976935  |
| Mg10 | -0.837986 | 0.414224  | 1.082770  |
| Mg11 | -3.984748 | 0.954396  | 1.463768  |
| Mg12 | -2.997032 | -1.983232 | 0.848859  |
| Mg13 | 1.891103  | -0.863958 | -2.589148 |
| Mg14 | -0.573314 | -2.038905 | -1.073523 |

@mg14-isomer33 bp86/6-31G(d) Etot=-2801.245608 Eb=-12.10

|      |           |           |           |
|------|-----------|-----------|-----------|
| Mg1  | -1.837187 | -2.656374 | -0.620603 |
| Mg2  | -1.441936 | 0.107568  | -1.456524 |
| Mg3  | -3.542106 | 1.912344  | 0.319129  |
| Mg4  | 3.159930  | -1.553734 | 1.191942  |
| Mg5  | 1.069115  | -1.729187 | -1.151382 |
| Mg6  | 3.778535  | -0.186777 | -1.531468 |
| Mg7  | 1.210376  | 1.212426  | -2.377915 |
| Mg8  | -3.144166 | -0.825188 | 1.513669  |
| Mg9  | 5.218927  | 0.760012  | 0.877329  |
| Mg10 | -4.530271 | -0.598757 | -1.121886 |
| Mg11 | 1.708654  | 1.002293  | 0.760540  |
| Mg12 | -0.585829 | 2.727638  | -0.348226 |
| Mg13 | -0.022749 | -1.494598 | 1.690913  |
| Mg14 | -1.041292 | 1.322334  | 2.254482  |

@mg14-isomer34 bp86/6-31G(d) Etot=-2801.245413 Eb=-12.09

|      |           |           |           |
|------|-----------|-----------|-----------|
| Mg1  | -1.511951 | -2.305570 | -1.557774 |
| Mg2  | 1.030595  | 1.451694  | -0.000591 |
| Mg3  | -1.510566 | -2.302756 | 1.559412  |
| Mg4  | 1.102290  | -0.708678 | -2.209982 |
| Mg5  | -3.740851 | -1.013133 | 0.001329  |
| Mg6  | -1.523358 | 0.696272  | -1.616063 |
| Mg7  | 3.730740  | 1.454446  | -1.588004 |
| Mg8  | 1.092652  | -3.072466 | 0.000458  |
| Mg9  | 3.729289  | 1.453015  | 1.589189  |
| Mg10 | -1.522056 | 0.698582  | 1.616283  |
| Mg11 | 3.305609  | -1.063837 | -0.001255 |
| Mg12 | 1.104204  | -0.706993 | 2.208860  |
| Mg13 | -3.968169 | 2.034413  | -0.000082 |
| Mg14 | -1.318428 | 3.385011  | -0.001779 |

@mg14-isomer35 bp86/6-31G(d) Etot=-2801.244633 Eb=-12.05

|     |           |           |           |
|-----|-----------|-----------|-----------|
| Mg1 | 1.544274  | 0.886548  | 2.025326  |
| Mg2 | -1.832480 | 0.775043  | -1.055099 |
| Mg3 | 2.607521  | -1.775201 | 0.135519  |
| Mg4 | 0.353794  | 2.027849  | -2.764336 |
| Mg5 | 4.606713  | 0.295653  | 1.147351  |
| Mg6 | -1.585057 | 1.250207  | 1.918929  |
| Mg7 | -2.394358 | -3.856219 | 0.217064  |
| Mg8 | 0.491755  | -3.919766 | -0.612160 |
| Mg9 | -3.000025 | 3.374679  | 0.177630  |

|      |           |           |           |
|------|-----------|-----------|-----------|
| Mg10 | -0.398329 | -1.335127 | 0.881373  |
| Mg11 | -3.554621 | -1.053402 | 0.554486  |
| Mg12 | 0.518389  | -1.024044 | -2.034955 |
| Mg13 | 0.174582  | 3.091258  | 0.214082  |
| Mg14 | 2.467843  | 1.262520  | -0.805210 |

@mg14-isomer36 bp86/6-31G(d) Etot=-2801.243911 Eb=-12.02

|      |           |           |           |
|------|-----------|-----------|-----------|
| Mg1  | -0.686811 | -0.821528 | -3.273016 |
| Mg2  | 0.770208  | -0.012232 | 1.463152  |
| Mg3  | 3.476010  | -0.338020 | -0.123175 |
| Mg4  | -4.372550 | 1.264234  | 0.837777  |
| Mg5  | 0.803096  | 1.321532  | -1.204326 |
| Mg6  | -1.300805 | 2.330487  | 0.954054  |
| Mg7  | -2.325648 | 0.676305  | -1.268988 |
| Mg8  | 1.004471  | -1.899606 | -1.025057 |
| Mg9  | -2.217644 | -0.709889 | 1.645525  |
| Mg10 | -0.273053 | -3.010635 | 1.530041  |
| Mg11 | -2.081934 | -2.442683 | -0.878227 |
| Mg12 | 2.784270  | -3.274896 | 0.994080  |
| Mg13 | 0.940475  | 4.266597  | 0.290473  |
| Mg14 | 3.479914  | 2.650333  | 0.057686  |

@mg14-isomer37 bp86/6-31G(d) Etot=-2801.243800 Eb=-12.01

|      |           |           |           |
|------|-----------|-----------|-----------|
| Mg1  | -2.508236 | -0.690719 | -3.265032 |
| Mg2  | 1.401796  | -0.382504 | 1.187118  |
| Mg3  | 2.050925  | -3.243891 | 0.026790  |
| Mg4  | 3.775044  | 1.689391  | 1.191120  |
| Mg5  | 0.107772  | -1.248078 | -1.630118 |
| Mg6  | -0.733400 | 1.607928  | -1.876466 |
| Mg7  | -2.348315 | 2.931373  | 0.399590  |
| Mg8  | -2.973631 | -0.095166 | -0.402762 |
| Mg9  | 0.713560  | 2.622654  | 0.679962  |
| Mg10 | -1.410410 | 0.615443  | 2.136973  |
| Mg11 | -3.740334 | -1.525890 | 2.175594  |
| Mg12 | -0.968694 | -2.281473 | 1.000869  |
| Mg13 | 2.439032  | 1.099729  | -1.470458 |
| Mg14 | 4.194890  | -1.098798 | -0.153180 |

@mg14-isomer38 bp86/6-31G(d) Etot=-2801.243698 Eb=-12.01

|      |           |           |           |
|------|-----------|-----------|-----------|
| Mg1  | -1.192288 | -2.687323 | -2.083178 |
| Mg2  | -0.041430 | -0.202069 | -0.872490 |
| Mg3  | 1.279583  | 2.405564  | -1.673007 |
| Mg4  | -4.366502 | 1.789399  | 0.630821  |
| Mg5  | 3.055981  | -0.396769 | -1.597701 |
| Mg6  | -2.059875 | 0.434209  | 1.899652  |
| Mg7  | 1.626356  | -2.714926 | -0.105878 |
| Mg8  | 3.718207  | 2.125068  | 0.083248  |
| Mg9  | -1.654068 | -2.578501 | 0.831444  |
| Mg10 | 3.522223  | -0.724522 | 1.350255  |
| Mg11 | 0.638873  | -0.950406 | 2.365945  |
| Mg12 | 0.671094  | 1.898491  | 1.237935  |
| Mg13 | -3.286851 | -0.599997 | -0.988618 |
| Mg14 | -1.911304 | 2.201782  | -1.078428 |

@mg14-isomer39 bp86/6-31G(d) Etot=-2801.242392 Eb=-11.95

|     |           |           |           |
|-----|-----------|-----------|-----------|
| Mg1 | 1.120698  | -1.315364 | 1.583884  |
| Mg2 | 0.974646  | 1.755645  | -1.835850 |
| Mg3 | -4.184419 | 1.339364  | 0.057702  |
| Mg4 | 1.369392  | 2.030350  | 1.064245  |
| Mg5 | 0.012047  | 0.856425  | 3.551949  |
| Mg6 | 3.088050  | -0.539910 | -0.614923 |
| Mg7 | 2.137630  | -3.549668 | -0.211326 |
| Mg8 | -2.944227 | -1.905463 | -0.333212 |
| Mg9 | 3.834117  | 2.406476  | -0.686343 |

|      |           |           |           |
|------|-----------|-----------|-----------|
| Mg10 | -0.841551 | -4.130293 | -0.059891 |
| Mg11 | 0.129254  | -1.337154 | -1.298463 |
| Mg12 | -2.007699 | 0.795181  | -1.938678 |
| Mg13 | -1.384671 | 0.331022  | 0.966305  |
| Mg14 | -1.303267 | 3.263390  | -0.245399 |

@mg14-isomer40 bp86/6-31G(d) Etot=-2801.241813 Eb=-11.93

|      |           |           |           |
|------|-----------|-----------|-----------|
| Mg1  | 0.556117  | -0.202524 | 1.746818  |
| Mg2  | -0.860767 | 1.048854  | -1.083060 |
| Mg3  | 4.445136  | 1.304286  | -0.861324 |
| Mg4  | -3.856795 | 1.564316  | -0.012988 |
| Mg5  | 1.676160  | 2.147287  | 0.254425  |
| Mg6  | -5.686572 | -0.820818 | 0.177024  |
| Mg7  | -2.446545 | -0.837371 | 1.128340  |
| Mg8  | 3.624068  | -0.046107 | 1.763457  |
| Mg9  | -3.169367 | -0.901036 | -1.790653 |
| Mg10 | 1.842194  | -2.789219 | 1.412177  |
| Mg11 | 0.118004  | -1.788672 | -1.081456 |
| Mg12 | 3.261669  | -1.472169 | -0.909147 |
| Mg13 | -1.206230 | 2.185737  | 1.750577  |
| Mg14 | 1.702930  | 0.607436  | -2.494189 |

@mg14-isomer41 bp86/6-31G(d) Etot=-2801.237177 Eb=-11.72

|      |           |           |           |
|------|-----------|-----------|-----------|
| Mg1  | -2.981505 | -1.435868 | -0.032916 |
| Mg2  | 0.526249  | 2.643149  | 0.568120  |
| Mg3  | 4.280866  | 0.118693  | -1.165430 |
| Mg4  | -3.757673 | 1.364294  | 1.424637  |
| Mg5  | 1.168474  | 0.612043  | -1.748708 |
| Mg6  | -4.816448 | 0.873244  | -1.430788 |
| Mg7  | -0.138550 | -2.579563 | 0.584822  |
| Mg8  | 2.291748  | -2.189127 | -1.355083 |
| Mg9  | -0.857603 | 0.201392  | 1.833306  |
| Mg10 | -0.810011 | -1.822854 | -2.180305 |
| Mg11 | 1.119913  | -1.783709 | 3.268657  |
| Mg12 | 2.191258  | -0.070683 | 1.112170  |
| Mg13 | -1.747438 | 1.216528  | -0.965107 |
| Mg14 | 3.530720  | 2.852461  | 0.086625  |

@mg14-isomer42 bp86/6-31G(d) Etot=-2801.234891 Eb=-11.62

|      |           |           |           |
|------|-----------|-----------|-----------|
| Mg1  | -0.390714 | 1.506228  | -2.294507 |
| Mg2  | -0.250361 | -0.016832 | 2.609864  |
| Mg3  | -0.318256 | -4.146695 | -0.377636 |
| Mg4  | 4.326280  | 0.002193  | 0.050641  |
| Mg5  | -0.386050 | -1.483020 | -2.311780 |
| Mg6  | 1.280783  | 1.507203  | 0.345720  |
| Mg7  | -0.318398 | 4.150140  | -0.338452 |
| Mg8  | -3.113800 | 0.009310  | -2.021746 |
| Mg9  | 2.918481  | -0.013438 | 2.748748  |
| Mg10 | -2.001210 | -1.521153 | 0.423374  |
| Mg11 | -2.007378 | 1.518770  | 0.441932  |
| Mg12 | -3.446443 | -0.016959 | 2.727579  |
| Mg13 | 2.415560  | 0.017520  | -2.331014 |
| Mg14 | 1.291507  | -1.513267 | 0.327276  |

@mg14-isomer43 bp86/6-31G(d) Etot=-2801.230817 Eb=-11.43

|     |           |           |           |
|-----|-----------|-----------|-----------|
| Mg1 | -0.095627 | 2.093321  | 2.140604  |
| Mg2 | -2.438653 | 2.811024  | -0.038115 |
| Mg3 | 0.212225  | 1.078856  | -0.690211 |
| Mg4 | 3.002378  | 1.557740  | -2.038357 |
| Mg5 | -0.615881 | -2.146078 | -0.690700 |
| Mg6 | -4.939601 | 0.723724  | -0.116140 |
| Mg7 | 2.528001  | -1.195657 | -0.765953 |
| Mg8 | 0.831394  | -0.928309 | 1.927895  |
| Mg9 | 5.440908  | 0.419809  | -0.464520 |

|      |           |           |           |
|------|-----------|-----------|-----------|
| Mg10 | 1.788741  | -3.666757 | 0.778589  |
| Mg11 | 2.807082  | 1.425758  | 1.060946  |
| Mg12 | -2.097543 | -0.084276 | 1.173029  |
| Mg13 | -3.884359 | -2.221259 | -0.407327 |
| Mg14 | -2.539065 | 0.132105  | -1.869740 |

@mg14-isomer44 bp86/6-31G(d) Etot=-2801.228306 Eb=-11.32

|      |           |           |           |
|------|-----------|-----------|-----------|
| Mg1  | -2.269506 | 1.491833  | 1.167752  |
| Mg2  | -0.786531 | 1.609945  | -1.487682 |
| Mg3  | -2.723215 | -0.950490 | -1.226355 |
| Mg4  | 2.403909  | -2.552628 | -0.628080 |
| Mg5  | 1.032686  | 2.331567  | 0.968286  |
| Mg6  | 3.240252  | -0.396934 | 1.539145  |
| Mg7  | 4.218722  | 2.230247  | 0.455698  |
| Mg8  | -5.037857 | 0.087659  | 0.667447  |
| Mg9  | 5.066581  | -0.559566 | -0.783936 |
| Mg10 | -3.908332 | 1.921478  | -1.424141 |
| Mg11 | 2.116384  | 0.478006  | -1.239417 |
| Mg12 | -0.814767 | -3.201864 | -0.537056 |
| Mg13 | 0.060382  | -0.614233 | 0.851796  |
| Mg14 | -2.598710 | -1.875021 | 1.676542  |

@mg15-isomer01 bp86/6-31G(d) Etot=-3001.368988 Eb=-13.53

|      |           |           |           |
|------|-----------|-----------|-----------|
| Mg1  | 0.001496  | 1.916409  | 0.464728  |
| Mg2  | 3.272404  | 1.771370  | 0.433003  |
| Mg3  | 1.676895  | -2.840460 | -0.691831 |
| Mg4  | 1.677456  | 2.018385  | -2.112981 |
| Mg5  | -0.000227 | -0.554307 | -1.891594 |
| Mg6  | -3.272057 | 1.772854  | 0.433365  |
| Mg7  | -3.272236 | -0.511028 | -1.750163 |
| Mg8  | -3.272910 | -1.259273 | 1.320149  |
| Mg9  | -1.679414 | -2.839372 | -0.691529 |
| Mg10 | 0.000428  | -1.361763 | 1.422375  |
| Mg11 | -1.673440 | 0.820491  | 2.802998  |
| Mg12 | -1.676789 | 2.018872  | -2.111499 |
| Mg13 | 3.271830  | -0.511586 | -1.749498 |
| Mg14 | 1.674383  | 0.819352  | 2.803261  |
| Mg15 | 3.272182  | -1.259942 | 1.319217  |

@mg15-isomer02 bp86/6-31G(d) Etot=-3001.365066 Eb=-13.37

|      |           |           |           |
|------|-----------|-----------|-----------|
| Mg1  | 4.006003  | -0.001632 | -0.513672 |
| Mg2  | 2.982147  | 2.627484  | 0.676502  |
| Mg3  | -3.071190 | -1.600948 | 1.406854  |
| Mg4  | -2.229374 | -2.656034 | -1.327721 |
| Mg5  | -3.719790 | -0.002754 | -1.185002 |
| Mg6  | -3.073472 | 1.603047  | 1.403208  |
| Mg7  | 2.980224  | -2.625665 | 0.684808  |
| Mg8  | 0.019305  | 1.729396  | 0.586282  |
| Mg9  | 1.863467  | -1.652799 | -1.964221 |
| Mg10 | -0.740708 | -0.001988 | -2.010664 |
| Mg11 | 2.211857  | 0.002968  | 2.092184  |
| Mg12 | -2.231166 | 2.652417  | -1.333378 |
| Mg13 | -0.880328 | 0.004919  | 2.863528  |
| Mg14 | 1.864068  | 1.645940  | -1.967923 |
| Mg15 | 0.018955  | -1.724351 | 0.589215  |

@mg15-isomer03 bp86/6-31G(d) Etot=-3001.364408 Eb=-13.34

|     |           |           |           |
|-----|-----------|-----------|-----------|
| Mg1 | -0.000316 | 1.700329  | -0.063323 |
| Mg2 | -2.587918 | 1.611071  | 1.792615  |
| Mg3 | -0.000120 | -1.706046 | -0.055179 |
| Mg4 | -4.039258 | 0.000710  | -0.413702 |
| Mg5 | 0.001102  | 0.004535  | 2.489726  |
| Mg6 | -2.744041 | 2.674319  | -1.075554 |
| Mg7 | 4.037193  | 0.000396  | -0.415391 |

|      |           |           |           |
|------|-----------|-----------|-----------|
| Mg8  | -1.521985 | -0.006913 | -2.220176 |
| Mg9  | 2.589193  | 1.610234  | 1.792456  |
| Mg10 | -2.747249 | -2.679265 | -1.063493 |
| Mg11 | 1.520562  | -0.004543 | -2.219429 |
| Mg12 | 2.745719  | -2.679068 | -1.066881 |
| Mg13 | 2.589162  | -1.602345 | 1.795894  |
| Mg14 | 2.744109  | 2.676199  | -1.074655 |
| Mg15 | -2.586152 | -1.599614 | 1.797092  |

@mg15-isomer04 bp86/6-31G(d) Etot=-3001.363328 Eb=-13.30

|      |           |           |           |
|------|-----------|-----------|-----------|
| Mg1  | -3.232039 | 2.577092  | 0.402159  |
| Mg2  | -1.082979 | -1.632015 | -1.611768 |
| Mg3  | 2.019827  | 2.494668  | -0.957182 |
| Mg4  | -0.382656 | 2.515819  | 1.543315  |
| Mg5  | 0.586074  | -0.000042 | 0.421530  |
| Mg6  | -2.398060 | -0.000685 | 1.704569  |
| Mg7  | -1.085768 | 1.630737  | -1.608950 |
| Mg8  | -3.227004 | -2.578757 | 0.401326  |
| Mg9  | -3.661425 | -0.001833 | -1.213647 |
| Mg10 | 2.025530  | -2.493174 | -0.958085 |
| Mg11 | 1.485342  | 0.000216  | -2.619886 |
| Mg12 | 3.800093  | 0.002968  | -0.696190 |
| Mg13 | 2.766617  | -1.571822 | 1.823864  |
| Mg14 | 2.767034  | 1.574015  | 1.822690  |
| Mg15 | -0.380588 | -2.517186 | 1.546256  |

@mg15-isomer05 bp86/6-31G(d) Etot=-3001.358222 Eb=-13.08

|      |           |           |           |
|------|-----------|-----------|-----------|
| Mg1  | -1.385473 | -0.000063 | 2.600059  |
| Mg2  | 1.875157  | 0.000085  | -2.470975 |
| Mg3  | -0.539258 | 0.000086  | -0.521388 |
| Mg4  | 3.358464  | 1.798005  | -0.572453 |
| Mg5  | 0.538310  | 2.618604  | -1.376123 |
| Mg6  | -2.845406 | 1.591522  | -1.752218 |
| Mg7  | -2.845378 | -1.591396 | -1.752276 |
| Mg8  | 0.538090  | -2.618438 | -1.376329 |
| Mg9  | 3.358338  | -1.798101 | -0.572602 |
| Mg10 | -3.814364 | 0.000015  | 0.792911  |
| Mg11 | -2.046288 | -2.523721 | 0.979921  |
| Mg12 | 1.108452  | -1.652127 | 1.580120  |
| Mg13 | 3.637018  | -0.000160 | 1.881095  |
| Mg14 | 1.108547  | 1.651997  | 1.580245  |
| Mg15 | -2.046208 | 2.523692  | 0.980012  |

@mg15-isomer06 bp86/6-31G(d) Etot=-3001.356777 Eb=-13.02

|      |           |           |           |
|------|-----------|-----------|-----------|
| Mg1  | 0.014158  | 0.073565  | -0.321273 |
| Mg2  | 4.029666  | 1.664870  | -0.021819 |
| Mg3  | 1.650655  | -2.874379 | 0.142112  |
| Mg4  | 1.572900  | 1.882284  | 1.668810  |
| Mg5  | -0.001912 | -0.997911 | 2.424254  |
| Mg6  | -4.005864 | 1.715900  | -0.012428 |
| Mg7  | -3.118493 | -0.732733 | 1.601566  |
| Mg8  | -2.897704 | -0.711651 | -1.578567 |
| Mg9  | -1.694021 | -2.867679 | 0.158865  |
| Mg10 | -0.034093 | -2.000733 | -2.346488 |
| Mg11 | -1.622380 | 2.222807  | -1.689721 |
| Mg12 | -1.530348 | 1.891730  | 1.657808  |
| Mg13 | 3.113759  | -0.771669 | 1.588121  |
| Mg14 | 1.646700  | 2.239355  | -1.673734 |
| Mg15 | 2.876976  | -0.733756 | -1.597507 |

@mg15-isomer07 bp86/6-31G(d) Etot=-3001.356654 Eb=-13.02

|     |           |           |           |
|-----|-----------|-----------|-----------|
| Mg1 | 2.792306  | -2.499600 | -1.236208 |
| Mg2 | 2.398189  | -1.439147 | 1.563390  |
| Mg3 | -0.833648 | 1.410770  | -1.582659 |



|      |           |           |           |
|------|-----------|-----------|-----------|
| Mg4  | -2.890601 | -2.906444 | 0.432288  |
| Mg5  | 1.944636  | 2.605652  | -0.667120 |
| Mg6  | -0.118086 | -1.616431 | -0.817118 |
| Mg7  | 1.711212  | 0.098630  | -2.506488 |
| Mg8  | -2.988502 | -0.966301 | -1.857070 |
| Mg9  | 0.274031  | 0.817355  | 1.319692  |
| Mg10 | -2.011024 | 2.832487  | 1.207808  |
| Mg11 | -2.994220 | -0.036555 | 1.469033  |
| Mg12 | -0.568397 | -1.962971 | 2.193713  |
| Mg13 | 3.118639  | 1.608781  | 1.959275  |
| Mg14 | -3.845756 | 1.796761  | -0.904433 |
| Mg15 | 4.011220  | 0.257013  | -0.574102 |

@mg15-isomer08 bp86/6-31G(d) Etot=-3001.352278 Eb=-12.84

|      |           |           |           |
|------|-----------|-----------|-----------|
| Mg1  | -3.803760 | 1.827728  | -1.945378 |
| Mg2  | -1.569510 | -0.190191 | -2.132562 |
| Mg3  | 1.072567  | 1.303631  | -1.496779 |
| Mg4  | 1.013957  | -1.967487 | -1.870320 |
| Mg5  | -3.555299 | -0.189682 | 0.287338  |
| Mg6  | -1.901202 | -2.753505 | -0.614504 |
| Mg7  | -1.552478 | 2.263261  | -0.062671 |
| Mg8  | 3.667010  | -0.526222 | -1.450511 |
| Mg9  | 2.719909  | -2.725160 | 0.507227  |
| Mg10 | 1.094547  | 2.158494  | 1.666474  |
| Mg11 | 3.488614  | 2.490748  | -0.217754 |
| Mg12 | -2.330805 | -2.023611 | 2.260690  |
| Mg13 | 0.126484  | -0.737980 | 0.872855  |
| Mg14 | -1.802852 | 0.982258  | 2.616856  |
| Mg15 | 3.332818  | 0.087717  | 1.579040  |

@mg15-isomer09 bp86/6-31G(d) Etot=-3001.352016 Eb=-12.82

|      |           |           |           |
|------|-----------|-----------|-----------|
| Mg1  | 1.516498  | -2.144980 | -0.598571 |
| Mg2  | 0.681081  | 3.366862  | 0.029265  |
| Mg3  | 2.974953  | -0.698820 | 1.794762  |
| Mg4  | -3.184031 | 1.258540  | 1.066295  |
| Mg5  | 4.237540  | -0.479594 | -0.962245 |
| Mg6  | 1.516264  | 0.776771  | -1.629379 |
| Mg7  | -2.516849 | -1.550515 | 1.760094  |
| Mg8  | -1.428797 | 1.384174  | -1.406126 |
| Mg9  | -0.662002 | -1.352735 | -2.619370 |
| Mg10 | -1.322971 | -3.398372 | -0.443152 |
| Mg11 | 3.375220  | 2.033599  | 0.587473  |
| Mg12 | -2.228797 | 4.073118  | 0.332383  |
| Mg13 | 0.391421  | -2.434946 | 2.133118  |
| Mg14 | -3.273022 | -1.153737 | -1.098642 |
| Mg15 | -0.076508 | 0.320636  | 1.054094  |

@mg15-isomer10 bp86/6-31G(d) Etot=-3001.351534 Eb=-12.80

|      |           |           |           |
|------|-----------|-----------|-----------|
| Mg1  | 0.001065  | 1.148653  | 0.906823  |
| Mg2  | -1.516324 | 1.502624  | -1.791744 |
| Mg3  | -1.807524 | -3.030522 | 0.402516  |
| Mg4  | -3.077102 | -1.278371 | -1.669924 |
| Mg5  | -4.291830 | 1.351025  | -0.667123 |
| Mg6  | 0.000263  | -1.169058 | -1.484895 |
| Mg7  | 3.077940  | -1.280016 | -1.669944 |
| Mg8  | -2.585285 | 2.633201  | 1.376491  |
| Mg9  | 2.586113  | 2.634139  | 1.377503  |
| Mg10 | -2.834841 | -0.423724 | 1.491627  |
| Mg11 | 1.806840  | -3.029889 | 0.402788  |
| Mg12 | 2.833969  | -0.423002 | 1.493652  |
| Mg13 | -0.001039 | -1.487222 | 2.292927  |
| Mg14 | 4.290495  | 1.349616  | -0.667693 |
| Mg15 | 1.517260  | 1.502546  | -1.793005 |

@mg15-isomer11 bp86/6-31G(d) Etot=-3001.350995 Eb=-12.78

|      |           |           |           |
|------|-----------|-----------|-----------|
| Mg1  | 0.130580  | 4.251728  | 0.386723  |
| Mg2  | 2.357033  | 2.334154  | -0.579530 |
| Mg3  | -1.940218 | -0.940978 | -2.412013 |
| Mg4  | 0.942398  | -1.953626 | 2.357496  |
| Mg5  | -0.394677 | -2.488055 | -0.215628 |
| Mg6  | -3.748230 | 0.492520  | -0.377141 |
| Mg7  | -3.474646 | -2.553913 | -0.313683 |
| Mg8  | 0.339814  | 0.641184  | 1.051633  |
| Mg9  | -2.204213 | 2.335428  | 1.445066  |
| Mg10 | -1.028168 | 1.905481  | -1.315773 |
| Mg11 | 1.007834  | -0.289198 | -1.945297 |
| Mg12 | 3.419418  | -0.091420 | 1.480776  |
| Mg13 | -2.136383 | -0.759713 | 1.897928  |
| Mg14 | 3.968248  | -0.181476 | -1.420771 |
| Mg15 | 2.761209  | -2.702113 | -0.039785 |

@mg15-isomer12 bp86/6-31G(d) Etot=-3001.349753 Eb=-12.73

|      |           |           |           |
|------|-----------|-----------|-----------|
| Mg1  | -3.965233 | -2.159670 | 0.164172  |
| Mg2  | -1.827369 | -2.077320 | -2.026187 |
| Mg3  | -1.038986 | -2.212687 | 1.059319  |
| Mg4  | 1.044597  | -2.220952 | -1.061926 |
| Mg5  | -2.882627 | 0.237206  | 1.892215  |
| Mg6  | -3.357912 | 0.460779  | -1.121376 |
| Mg7  | 3.967199  | -2.155995 | -0.158530 |
| Mg8  | 1.829171  | -2.069569 | 2.028953  |
| Mg9  | 0.189867  | 0.517878  | 1.569340  |
| Mg10 | -0.003624 | 5.148858  | -0.003279 |
| Mg11 | -0.189049 | 0.509188  | -1.564546 |
| Mg12 | 2.881042  | 0.237354  | -1.892136 |
| Mg13 | -1.734008 | 2.657340  | 0.325651  |
| Mg14 | 3.357050  | 0.468038  | 1.120665  |
| Mg15 | 1.729881  | 2.659553  | -0.332334 |

@mg15-isomer13 bp86/6-31G(d) Etot=-3001.348769 Eb=-12.69

|      |           |           |           |
|------|-----------|-----------|-----------|
| Mg1  | -2.638563 | -1.159068 | -1.809795 |
| Mg2  | -1.314857 | 2.892168  | 0.943291  |
| Mg3  | 2.867554  | 0.560607  | -1.482116 |
| Mg4  | 1.900272  | 2.006172  | 1.177017  |
| Mg5  | -4.265141 | -2.301315 | 0.599851  |
| Mg6  | -2.450292 | 2.005177  | -1.755058 |
| Mg7  | -0.168868 | 0.280382  | -0.634385 |
| Mg8  | -3.251384 | 0.585625  | 0.897645  |
| Mg9  | -1.291992 | -2.131455 | 0.920164  |
| Mg10 | -0.577522 | 0.437640  | 2.593606  |
| Mg11 | 1.657500  | -1.479064 | 1.417414  |
| Mg12 | 0.852763  | 2.838326  | -1.660619 |
| Mg13 | 3.670439  | -2.287191 | -0.775586 |
| Mg14 | 0.809143  | -2.282778 | -1.757338 |
| Mg15 | 4.200947  | 0.034775  | 1.325909  |

@mg15-isomer14 bp86/6-31G(d) Etot=-3001.348188 Eb=-12.66

|      |           |           |           |
|------|-----------|-----------|-----------|
| Mg1  | -3.005294 | -0.954229 | 1.749202  |
| Mg2  | -3.412536 | 1.155012  | -0.467701 |
| Mg3  | 0.386813  | -1.268025 | 1.948538  |
| Mg4  | -3.850386 | -1.878340 | -0.907084 |
| Mg5  | -0.711983 | 1.365093  | 1.079956  |
| Mg6  | -1.392304 | -3.355122 | 0.340815  |
| Mg7  | -0.883110 | -0.715303 | -1.205196 |
| Mg8  | -1.923785 | 3.942422  | -0.275781 |
| Mg9  | 1.031008  | 4.001092  | 0.454209  |
| Mg10 | 3.459169  | -1.536363 | 1.740462  |
| Mg11 | 1.145000  | 1.541404  | -1.339033 |
| Mg12 | 2.352850  | 1.249227  | 1.440961  |

|      |          |           |           |
|------|----------|-----------|-----------|
| Mg13 | 1.529658 | -2.490146 | -0.478072 |
| Mg14 | 1.567776 | -0.839924 | -3.074812 |
| Mg15 | 3.707122 | -0.216798 | -1.006462 |

@mg15-isomer15 bp86/6-31G(d) Etot=-3001.348056 Eb=-12.66

|      |           |           |           |
|------|-----------|-----------|-----------|
| Mg1  | -0.183919 | 0.268934  | -1.756488 |
| Mg2  | 1.268543  | 2.978745  | -1.294483 |
| Mg3  | -0.511728 | -1.518310 | 1.003065  |
| Mg4  | -0.981627 | 2.034538  | 0.745066  |
| Mg5  | -2.173960 | 2.689651  | -1.927499 |
| Mg6  | 3.109566  | 0.543033  | -1.129219 |
| Mg7  | 2.642699  | -0.937326 | 1.573322  |
| Mg8  | 1.466829  | -2.202732 | -1.292079 |
| Mg9  | -2.913514 | 0.189919  | 2.209799  |
| Mg10 | 2.449265  | 2.193011  | 1.404753  |
| Mg11 | 0.287311  | 0.588443  | 2.983821  |
| Mg12 | -3.496218 | 0.140413  | -0.987641 |
| Mg13 | -1.799070 | -2.406420 | -1.726654 |
| Mg14 | 4.386877  | -2.225677 | -0.517389 |
| Mg15 | -3.551055 | -2.336221 | 0.711627  |

@mg15-isomer16 bp86/6-31G(d) Etot=-3001.347397 Eb=-12.63

|      |           |           |           |
|------|-----------|-----------|-----------|
| Mg1  | 1.052377  | 2.036582  | 1.980735  |
| Mg2  | -1.720301 | -2.625081 | 1.005539  |
| Mg3  | 1.687989  | 4.292558  | -0.029100 |
| Mg4  | -2.034129 | -0.500470 | -1.448331 |
| Mg5  | 2.994077  | -1.628761 | -1.096831 |
| Mg6  | 2.779298  | 1.411882  | -0.600847 |
| Mg7  | 1.458366  | -3.316919 | 1.134002  |
| Mg8  | 3.173197  | -0.672306 | 1.747502  |
| Mg9  | -0.587789 | 2.366737  | -0.734536 |
| Mg10 | -2.112787 | 0.888943  | 1.694515  |
| Mg11 | -4.284531 | -0.867758 | 0.620911  |
| Mg12 | -3.673548 | 1.954727  | -0.650804 |
| Mg13 | 0.032444  | -2.885338 | -1.485048 |
| Mg14 | 0.846633  | 0.006053  | -2.619595 |
| Mg15 | 0.388704  | -0.460849 | 0.481887  |

@mg15-isomer17 bp86/6-31G(d) Etot=-3001.347092 Eb=-12.62

|      |           |           |           |
|------|-----------|-----------|-----------|
| Mg1  | -3.051373 | -3.019702 | -0.225392 |
| Mg2  | 0.525424  | -0.902006 | 2.703372  |
| Mg3  | -0.046659 | 0.990329  | 0.438379  |
| Mg4  | 2.535111  | -2.584086 | -1.718730 |
| Mg5  | 2.914216  | -1.991469 | 1.207067  |
| Mg6  | -2.460336 | -0.575310 | 1.723997  |
| Mg7  | -1.945559 | -0.265528 | -1.737449 |
| Mg8  | -2.883417 | 2.315474  | 0.036184  |
| Mg9  | 3.680986  | 0.155223  | -0.848226 |
| Mg10 | 0.019545  | -2.159543 | -0.099215 |
| Mg11 | 1.007055  | 0.069117  | -2.227118 |
| Mg12 | 2.699567  | 1.094554  | 1.864017  |
| Mg13 | -0.500962 | 4.379670  | -0.080419 |
| Mg14 | -4.560878 | -0.285298 | -0.325106 |
| Mg15 | 2.067279  | 2.778574  | -0.711363 |

@mg15-isomer18 bp86/6-31G(d) Etot=-3001.347063 Eb=-12.62

|     |           |           |           |
|-----|-----------|-----------|-----------|
| Mg1 | 3.478538  | -1.573267 | 0.560826  |
| Mg2 | 3.745521  | 0.598243  | -1.544750 |
| Mg3 | 0.921952  | 1.712527  | -1.386376 |
| Mg4 | -2.563965 | -1.023387 | 1.873405  |
| Mg5 | 0.576622  | -1.310002 | 1.674726  |
| Mg6 | -3.618903 | 1.245873  | 0.172811  |
| Mg7 | 2.516735  | 1.140501  | 1.411844  |
| Mg8 | -1.544637 | 3.357054  | -0.565702 |

|      |           |           |           |
|------|-----------|-----------|-----------|
| Mg9  | -4.007004 | -1.578525 | -0.833270 |
| Mg10 | -0.585325 | 1.318909  | 1.429296  |
| Mg11 | 1.266637  | 3.929856  | 0.758794  |
| Mg12 | 1.499083  | -3.905545 | 0.183929  |
| Mg13 | -1.260209 | -2.778548 | -0.398974 |
| Mg14 | -1.561548 | 0.104127  | -1.741731 |
| Mg15 | 1.136502  | -1.237815 | -1.594828 |

@mg15-isomer19 bp86/6-31G(d) Etot=-3001.346439 Eb=-12.59

|      |           |           |           |
|------|-----------|-----------|-----------|
| Mg1  | 0.178411  | 0.750782  | 1.053847  |
| Mg2  | -2.179588 | -1.344603 | -2.121532 |
| Mg3  | -0.811278 | -2.235801 | 0.805304  |
| Mg4  | 1.965757  | -1.409641 | 1.944600  |
| Mg5  | 2.469715  | 1.441939  | -1.716134 |
| Mg6  | 3.256805  | 1.431098  | 1.177980  |
| Mg7  | 3.764794  | -1.110712 | -0.487537 |
| Mg8  | -0.673289 | 1.458913  | -1.730215 |
| Mg9  | -3.602107 | 0.930651  | -0.605378 |
| Mg10 | -3.822179 | -1.967382 | 0.304239  |
| Mg11 | -2.527778 | 0.187504  | 2.113249  |
| Mg12 | 1.815464  | -3.778253 | -0.019539 |
| Mg13 | 0.805239  | -1.141832 | -1.556667 |
| Mg14 | 1.150611  | 3.764797  | 0.069429  |
| Mg15 | -1.790577 | 3.022540  | 0.768355  |

@mg15-isomer20 bp86/6-31G(d) Etot=-3001.345535 Eb=-12.55

|      |           |           |           |
|------|-----------|-----------|-----------|
| Mg1  | 1.457548  | -1.220462 | 1.890627  |
| Mg2  | 1.732401  | -3.081786 | -0.725161 |
| Mg3  | -1.031678 | -2.457190 | 0.467275  |
| Mg4  | -1.378976 | -0.889996 | 3.163827  |
| Mg5  | 4.096851  | -1.378426 | 0.468767  |
| Mg6  | -3.649620 | -0.525705 | 1.148467  |
| Mg7  | -0.505497 | 0.748000  | 0.843461  |
| Mg8  | 2.823892  | 1.461896  | 0.662394  |
| Mg9  | 2.729819  | -0.360251 | -1.913481 |
| Mg10 | -3.346278 | -1.948381 | -1.518887 |
| Mg11 | -0.378339 | -1.046760 | -2.086176 |
| Mg12 | 0.527280  | 1.852857  | -1.607029 |
| Mg13 | -2.712984 | 1.062185  | -1.336302 |
| Mg14 | 1.288189  | 4.138381  | 0.558343  |
| Mg15 | -1.652608 | 3.645639  | -0.016126 |

@mg15-isomer21 bp86/6-31G(d) Etot=-3001.345333 Eb=-12.55

|      |           |           |           |
|------|-----------|-----------|-----------|
| Mg1  | -4.116991 | 0.575766  | -0.620903 |
| Mg2  | 0.288453  | -1.649131 | 1.155886  |
| Mg3  | 1.121281  | -2.126435 | -1.723780 |
| Mg4  | 3.282964  | -0.659336 | 0.097709  |
| Mg5  | -3.003923 | 3.444117  | 0.020818  |
| Mg6  | -3.188587 | -1.916693 | 1.083063  |
| Mg7  | -1.922049 | -1.242537 | -1.566954 |
| Mg8  | -1.696696 | 0.809243  | 1.211470  |
| Mg9  | 0.030119  | 3.486519  | 0.226381  |
| Mg10 | 2.797167  | -1.327873 | 2.964472  |
| Mg11 | 2.899457  | 2.433190  | -0.489626 |
| Mg12 | -1.142525 | -4.016931 | -0.372421 |
| Mg13 | 2.992646  | 0.262379  | -2.692225 |
| Mg14 | 1.311555  | 1.166176  | 1.855073  |
| Mg15 | 0.347129  | 0.761547  | -1.148963 |

@mg15-isomer22 bp86/6-31G(d) Etot=-3001.344298 Eb=-12.50

|     |           |           |           |
|-----|-----------|-----------|-----------|
| Mg1 | 1.441807  | -1.136612 | 1.983810  |
| Mg2 | -1.946865 | 3.125210  | 0.715671  |
| Mg3 | 1.965871  | -4.004900 | 0.614854  |
| Mg4 | -0.648882 | 0.946573  | -0.906442 |

|      |           |           |           |
|------|-----------|-----------|-----------|
| Mg5  | 2.387383  | 1.520924  | -1.541641 |
| Mg6  | 2.816235  | -1.434150 | -0.820489 |
| Mg7  | 0.952359  | 1.834525  | 1.518123  |
| Mg8  | 3.752013  | 0.742799  | 1.048024  |
| Mg9  | 0.533738  | -0.823434 | -2.808228 |
| Mg10 | -1.447102 | -0.077465 | 1.926273  |
| Mg11 | -3.918680 | 0.795701  | 0.196929  |
| Mg12 | -3.485444 | -2.174299 | 0.804721  |
| Mg13 | 0.888435  | 4.105784  | -0.569593 |
| Mg14 | -2.850220 | -1.160494 | -1.977766 |
| Mg15 | -0.440649 | -2.260162 | -0.184247 |

@mg15-isomer23 bp86/6-31G(d) Etot=-3001.343148 Eb=-12.45

|      |           |           |           |
|------|-----------|-----------|-----------|
| Mg1  | -0.256108 | 1.089957  | 1.715824  |
| Mg2  | -1.509629 | -1.559857 | 0.975716  |
| Mg3  | -0.525386 | 0.681339  | -1.629098 |
| Mg4  | 2.650543  | 0.467765  | -1.764179 |
| Mg5  | -1.984169 | 2.965994  | 0.006410  |
| Mg6  | -3.769691 | 0.718524  | -1.250088 |
| Mg7  | 2.926943  | 0.850423  | 1.214969  |
| Mg8  | 5.685511  | 0.121322  | -0.403799 |
| Mg9  | -3.434966 | 0.790809  | 1.754480  |
| Mg10 | 0.769555  | -1.915410 | -0.947221 |
| Mg11 | 1.312154  | 2.883591  | -0.381719 |
| Mg12 | 1.275340  | -1.521731 | 2.192448  |
| Mg13 | 3.596546  | -1.988615 | 0.255752  |
| Mg14 | -2.203532 | -1.841704 | -1.962762 |
| Mg15 | -4.533111 | -1.742406 | 0.223266  |

@mg15-isomer24 bp86/6-31G(d) Etot=-3001.342225 Eb=-12.42

|      |           |           |           |
|------|-----------|-----------|-----------|
| Mg1  | 0.734945  | -0.518444 | -1.040862 |
| Mg2  | -0.650542 | 2.291599  | -1.099956 |
| Mg3  | 0.081746  | 1.085326  | 1.639352  |
| Mg4  | -3.483886 | 0.943978  | -0.907596 |
| Mg5  | -1.460068 | 0.014267  | -3.015800 |
| Mg6  | 2.508790  | 2.035331  | -0.406514 |
| Mg7  | -0.133217 | -1.952255 | 1.552142  |
| Mg8  | -2.685836 | -0.255295 | 1.872319  |
| Mg9  | 3.980335  | -0.736667 | -1.338251 |
| Mg10 | -2.426544 | 2.820172  | 1.306947  |
| Mg11 | 2.929809  | -0.473192 | 1.473530  |
| Mg12 | -2.137354 | -1.886147 | -0.716485 |
| Mg13 | 5.426322  | 1.255606  | 0.425426  |
| Mg14 | 2.456863  | -3.213553 | 0.034408  |
| Mg15 | -5.141361 | -1.410725 | 0.221341  |

@mg15-isomer25 bp86/6-31G(d) Etot=-3001.341684 Eb=-12.39

|      |           |           |           |
|------|-----------|-----------|-----------|
| Mg1  | 2.762868  | 2.952988  | -1.480500 |
| Mg2  | 2.749054  | -2.944172 | -1.492960 |
| Mg3  | -1.790498 | 0.009356  | -1.759119 |
| Mg4  | -0.223982 | -2.607063 | -1.887687 |
| Mg5  | -3.180910 | -2.488905 | -0.799248 |
| Mg6  | -3.179111 | 2.499876  | -0.784287 |
| Mg7  | 3.610053  | -1.520168 | 1.042651  |
| Mg8  | -0.801030 | 1.667119  | 1.011391  |
| Mg9  | 1.406271  | -0.000489 | 2.509842  |
| Mg10 | -0.798160 | -1.668218 | 1.005750  |
| Mg11 | 3.617210  | 1.499554  | 1.037479  |
| Mg12 | -3.620879 | -0.001367 | 0.918339  |
| Mg13 | -0.210146 | 2.621271  | -1.868169 |
| Mg14 | -1.760672 | -0.012720 | 3.310761  |
| Mg15 | 1.419934  | -0.007063 | -0.764245 |

@mg15-isomer26 bp86/6-31G(d) Etot=-3001.341337 Eb=-12.38

|      |           |           |           |
|------|-----------|-----------|-----------|
| Mg1  | -4.386115 | 1.276091  | 0.022684  |
| Mg2  | 0.055000  | 0.213520  | 1.361757  |
| Mg3  | -2.113975 | 2.457476  | 1.657942  |
| Mg4  | -2.866072 | -1.140052 | 1.050418  |
| Mg5  | -3.631607 | -0.993600 | -1.943490 |
| Mg6  | -1.589084 | 1.210807  | -1.251795 |
| Mg7  | 3.399027  | 2.921414  | -1.432919 |
| Mg8  | 0.715496  | 2.860980  | 0.101339  |
| Mg9  | -0.430496 | -2.699025 | 1.956189  |
| Mg10 | 2.348427  | -1.049872 | 3.016058  |
| Mg11 | 1.514946  | 0.412983  | -1.712522 |
| Mg12 | 3.301114  | 0.893497  | 0.888750  |
| Mg13 | -0.671722 | -1.875147 | -1.133575 |
| Mg14 | 1.983913  | -2.491398 | -2.759554 |
| Mg15 | 2.371147  | -1.997674 | 0.178718  |

@mg15-isomer27 bp86/6-31G(d) Etot=-3001.341173 Eb=-12.37

|      |           |           |           |
|------|-----------|-----------|-----------|
| Mg1  | -4.017805 | 0.748425  | -1.311457 |
| Mg2  | 1.117743  | 2.792794  | -0.965026 |
| Mg3  | -2.842010 | 0.275939  | 1.410931  |
| Mg4  | -2.155269 | 3.048807  | -0.082247 |
| Mg5  | -2.697220 | -2.101521 | -0.735987 |
| Mg6  | 2.143730  | -0.510701 | 2.945128  |
| Mg7  | 2.948321  | -1.885675 | 0.274157  |
| Mg8  | -0.721975 | 0.316056  | -1.228251 |
| Mg9  | 2.331652  | 0.107263  | -2.013585 |
| Mg10 | 3.164719  | 1.243476  | 0.672698  |
| Mg11 | -5.382898 | -1.251464 | 0.533692  |
| Mg12 | 0.592537  | -2.395324 | -1.581831 |
| Mg13 | 0.201428  | 1.473703  | 1.622728  |
| Mg14 | 5.420403  | -0.278232 | -0.770290 |
| Mg15 | -0.103355 | -1.583545 | 1.229341  |

@mg15-isomer28 bp86/6-31G(d) Etot=-3001.340723 Eb=-12.35

|      |           |           |           |
|------|-----------|-----------|-----------|
| Mg1  | 0.760412  | -0.955451 | 2.322842  |
| Mg2  | 2.831571  | 0.932480  | 1.127814  |
| Mg3  | -2.096795 | -0.427829 | 1.270183  |
| Mg4  | 2.789534  | -2.038948 | 0.290828  |
| Mg5  | 3.708111  | 0.660025  | -1.740723 |
| Mg6  | 0.711239  | -0.094148 | -1.320618 |
| Mg7  | -0.199257 | 1.900395  | 1.488350  |
| Mg8  | -0.361041 | -2.660726 | -0.061986 |
| Mg9  | -1.681152 | 1.899345  | -1.138569 |
| Mg10 | -3.487538 | 2.203566  | 1.388009  |
| Mg11 | 1.508486  | 2.811063  | -0.966207 |
| Mg12 | -4.495094 | 0.283629  | -0.626480 |
| Mg13 | -2.039836 | -0.987753 | -2.115321 |
| Mg14 | -3.558799 | -2.791106 | -0.147703 |
| Mg15 | 5.610159  | -0.734542 | 0.229581  |

@mg15-isomer29 bp86/6-31G(d) Etot=-3001.340546 Eb=-12.34

|      |           |           |           |
|------|-----------|-----------|-----------|
| Mg1  | 1.790821  | 0.385801  | -2.496957 |
| Mg2  | 2.805846  | -0.595609 | 2.327136  |
| Mg3  | -2.277315 | 2.995486  | 0.191258  |
| Mg4  | -2.561889 | 0.065502  | 1.641442  |
| Mg5  | -0.932170 | 0.350227  | -1.035338 |
| Mg6  | -5.241692 | -1.311130 | 0.904941  |
| Mg7  | 0.163885  | -1.663573 | 1.163442  |
| Mg8  | -2.779816 | -2.125773 | -0.651895 |
| Mg9  | 3.128430  | 1.389687  | 0.036716  |
| Mg10 | 0.788930  | 2.934600  | -0.920694 |
| Mg11 | 5.586037  | -0.431955 | 0.430290  |
| Mg12 | 0.410929  | 1.306333  | 1.707988  |
| Mg13 | 2.967961  | -1.739490 | -0.522269 |

|      |           |           |           |
|------|-----------|-----------|-----------|
| Mg14 | 0.328632  | -2.297614 | -1.816121 |
| Mg15 | -4.178590 | 0.737510  | -0.959938 |

@mg15-isomer30 bp86/6-31G(d) Etot=-3001.340405 Eb=-12.34

|      |           |           |           |
|------|-----------|-----------|-----------|
| Mg1  | 0.052747  | -0.875858 | 1.022555  |
| Mg2  | 3.085871  | 0.261975  | 1.629415  |
| Mg3  | 0.589911  | 2.135588  | 0.343644  |
| Mg4  | -2.617373 | -1.939286 | -0.643017 |
| Mg5  | 0.253634  | -2.537129 | -1.483848 |
| Mg6  | -1.699099 | 1.254062  | 2.163195  |
| Mg7  | -0.883229 | 0.298586  | -1.802844 |
| Mg8  | 2.277840  | -0.009294 | -1.313145 |
| Mg9  | -2.571076 | -1.681192 | 2.413734  |
| Mg10 | 2.994245  | -2.572853 | 0.225406  |
| Mg11 | -3.906361 | 0.443399  | -2.203560 |
| Mg12 | -4.288332 | 0.275726  | 0.736823  |
| Mg13 | 5.400420  | -0.160640 | -0.270350 |
| Mg14 | 3.774755  | 2.517794  | -0.318962 |
| Mg15 | -2.463953 | 2.589121  | -0.499046 |

@mg15-isomer31 bp86/6-31G(d) Etot=-3001.340233 Eb=-12.33

|      |           |           |           |
|------|-----------|-----------|-----------|
| Mg1  | 2.237527  | 0.846899  | 0.724731  |
| Mg2  | 4.033995  | -0.696289 | -1.521358 |
| Mg3  | 3.099167  | -2.035868 | 1.179181  |
| Mg4  | 1.079477  | -1.738004 | -1.210861 |
| Mg5  | 0.551778  | 3.103655  | -0.333370 |
| Mg6  | 0.019227  | -1.340928 | 1.597688  |
| Mg7  | 5.442687  | 0.004223  | 0.991545  |
| Mg8  | -0.946416 | 0.503239  | -1.053166 |
| Mg9  | -1.992689 | -2.276342 | -0.722494 |
| Mg10 | -0.432270 | 1.623614  | 2.163080  |
| Mg11 | 1.689680  | 1.139225  | -2.424415 |
| Mg12 | -3.010340 | -0.086842 | 1.497292  |
| Mg13 | -2.675287 | 2.753932  | 0.258583  |
| Mg14 | -4.160094 | 0.418512  | -1.211286 |
| Mg15 | -4.936440 | -2.219027 | 0.064848  |

@mg15-isomer32 bp86/6-31G(d) Etot=-3001.338341 Eb=-12.25

|      |           |           |           |
|------|-----------|-----------|-----------|
| Mg1  | 2.862727  | 2.284273  | -2.177739 |
| Mg2  | -0.185688 | -2.382459 | 1.546193  |
| Mg3  | -1.141199 | 0.254242  | 0.440361  |
| Mg4  | 3.679475  | 1.187708  | 0.710733  |
| Mg5  | 1.749745  | -0.378906 | -1.101255 |
| Mg6  | -0.603182 | 1.252965  | -2.517686 |
| Mg7  | -1.699939 | 2.749320  | 2.016767  |
| Mg8  | -4.073356 | 1.155242  | 0.762805  |
| Mg9  | -3.308824 | -0.086296 | -1.953434 |
| Mg10 | 0.830514  | 2.516436  | 0.060242  |
| Mg11 | 3.007106  | -1.651437 | 1.509696  |
| Mg12 | -3.172193 | -1.956743 | 0.683249  |
| Mg13 | 1.111142  | 0.497613  | 2.482660  |
| Mg14 | -0.930494 | -2.055907 | -1.541487 |
| Mg15 | 1.874166  | -3.386052 | -0.921106 |

@mg15-isomer33 bp86/6-31G(d) Etot=-3001.338115 Eb=-12.24

|     |           |           |           |
|-----|-----------|-----------|-----------|
| Mg1 | -2.170577 | 1.973659  | -0.998095 |
| Mg2 | -1.777856 | -0.717886 | 1.517693  |
| Mg3 | -0.440184 | -2.495655 | -0.478525 |
| Mg4 | 1.229765  | -0.954444 | 1.664798  |
| Mg5 | -3.147824 | 1.915848  | 1.942573  |
| Mg6 | 5.705926  | -0.059464 | -0.739782 |
| Mg7 | 2.896940  | 1.342135  | -0.023634 |
| Mg8 | 0.285970  | 0.264214  | -1.563623 |
| Mg9 | -3.573101 | -2.884163 | -0.028077 |

|      |           |           |           |
|------|-----------|-----------|-----------|
| Mg10 | 4.343456  | -1.065444 | 1.690970  |
| Mg11 | 2.863709  | -1.597081 | -0.940620 |
| Mg12 | 0.843346  | 3.261387  | -1.178569 |
| Mg13 | -0.097051 | 1.798097  | 1.324092  |
| Mg14 | -4.485165 | 0.062820  | -0.036454 |
| Mg15 | -2.477354 | -0.844023 | -2.152746 |

@mg15-isomer34 bp86/6-31G(d) Etot=-3001.336996 Eb=-12.20

|      |           |           |           |
|------|-----------|-----------|-----------|
| Mg1  | -2.563989 | 1.613909  | -0.673530 |
| Mg2  | 0.155408  | 1.600338  | -1.972169 |
| Mg3  | 0.111718  | 1.316936  | 1.098510  |
| Mg4  | 0.874570  | -1.173643 | -0.844721 |
| Mg5  | -3.423213 | -1.390937 | 0.149134  |
| Mg6  | -2.719563 | 0.778227  | 2.232422  |
| Mg7  | -0.681465 | -1.508519 | 1.804035  |
| Mg8  | -5.434185 | 0.892653  | 0.279669  |
| Mg9  | 2.412643  | -0.880123 | 1.758531  |
| Mg10 | 3.215936  | 1.151186  | -0.677303 |
| Mg11 | -1.720539 | -0.843997 | -2.398650 |
| Mg12 | -1.330716 | -3.367444 | -0.648100 |
| Mg13 | 5.348400  | -0.217176 | 1.089123  |
| Mg14 | 3.983277  | -1.807801 | -1.009179 |
| Mg15 | 1.771717  | 3.836392  | -0.187772 |

@mg15-isomer35 bp86/6-31G(d) Etot=-3001.334961 Eb=-12.11

|      |           |           |           |
|------|-----------|-----------|-----------|
| Mg1  | -1.329837 | -1.855289 | 0.170200  |
| Mg2  | -1.344236 | -0.489595 | 2.826960  |
| Mg3  | -0.226078 | 1.441797  | 0.607841  |
| Mg4  | -1.990018 | 3.500640  | -0.735986 |
| Mg5  | 0.830417  | -0.344801 | -1.615231 |
| Mg6  | 2.846775  | 1.661676  | -0.299769 |
| Mg7  | -2.007997 | 0.637984  | -1.953658 |
| Mg8  | 1.493112  | -1.000945 | 1.418706  |
| Mg9  | -3.950295 | -1.808301 | 1.666247  |
| Mg10 | -3.356267 | 1.057696  | 0.729544  |
| Mg11 | 1.197522  | -3.385308 | -0.759270 |
| Mg12 | 1.023606  | 4.169137  | -0.443635 |
| Mg13 | -1.390707 | -2.314575 | -2.685821 |
| Mg14 | 4.537239  | 0.149081  | 1.808139  |
| Mg15 | 3.666765  | -1.419197 | -0.734268 |

@mg15-isomer36 bp86/6-31G(d) Etot=-3001.333253 Eb=-12.04

|      |           |           |           |
|------|-----------|-----------|-----------|
| Mg1  | -1.392119 | -0.943795 | 2.523916  |
| Mg2  | -0.031055 | 2.210388  | -1.181731 |
| Mg3  | -1.822578 | 1.777237  | 1.199248  |
| Mg4  | 0.334481  | -0.804307 | -1.312822 |
| Mg5  | 1.139218  | 0.616187  | 1.282774  |
| Mg6  | -4.685953 | 2.489592  | -0.114009 |
| Mg7  | 0.785957  | -2.655952 | 1.176852  |
| Mg8  | -2.193394 | -2.422115 | 0.058130  |
| Mg9  | 3.046296  | 1.392466  | -1.258452 |
| Mg10 | 4.335862  | 1.334270  | 1.464761  |
| Mg11 | -4.172731 | -0.291558 | 1.146987  |
| Mg12 | 3.370319  | -1.367801 | 0.209854  |
| Mg13 | 5.881088  | 0.146315  | -0.800548 |
| Mg14 | -1.942897 | -2.001823 | -2.930416 |
| Mg15 | -2.652491 | 0.520896  | -1.464542 |

@mg15-isomer37 bp86/6-31G(d) Etot=-3001.328999 Eb=-11.86

|     |           |           |           |
|-----|-----------|-----------|-----------|
| Mg1 | 0.944796  | -1.609582 | -1.016275 |
| Mg2 | -1.390131 | 0.242299  | -1.942054 |
| Mg3 | -4.107095 | -0.304575 | -0.122546 |
| Mg4 | 3.465879  | 0.507702  | -1.449132 |
| Mg5 | -0.806100 | -0.386626 | 1.215008  |



|      |           |           |           |
|------|-----------|-----------|-----------|
| Mg6  | -3.194841 | 0.714159  | 2.711350  |
| Mg7  | 2.492039  | -0.245580 | 1.286067  |
| Mg8  | 4.004729  | -2.427682 | -0.628844 |
| Mg9  | -4.024736 | 1.639749  | -2.374465 |
| Mg10 | -2.052351 | -2.581559 | -1.023846 |
| Mg11 | 3.724626  | 2.612933  | 0.901735  |
| Mg12 | 0.720337  | 1.813139  | -0.173191 |
| Mg13 | 5.653543  | -0.017352 | 0.545513  |
| Mg14 | -3.071490 | -2.265501 | 1.903506  |
| Mg15 | -2.359205 | 2.308477  | 0.167173  |

@mg15-isomer38 bp86/6-31G(d) Etot=-3001.327049 Eb=-11.78

|      |           |           |           |
|------|-----------|-----------|-----------|
| Mg1  | -0.161813 | 1.291971  | -0.428185 |
| Mg2  | -0.053652 | -1.561728 | -1.695128 |
| Mg3  | -1.011591 | -1.564091 | 1.217367  |
| Mg4  | -2.271910 | 0.330190  | -2.394714 |
| Mg5  | -3.027577 | -2.328234 | -0.993349 |
| Mg6  | 2.853712  | 2.045265  | 0.753310  |
| Mg7  | -4.135650 | -1.703272 | 1.735937  |
| Mg8  | -2.585758 | 0.974604  | 1.706589  |
| Mg9  | 5.146970  | 0.341675  | -0.133776 |
| Mg10 | 2.645620  | 0.662791  | -1.929199 |
| Mg11 | 7.784627  | -1.430200 | 0.205224  |
| Mg12 | -4.820399 | 0.216795  | -0.443156 |
| Mg13 | 2.185524  | -0.879395 | 0.581902  |
| Mg14 | -2.862350 | 2.726282  | -0.718204 |
| Mg15 | 0.314245  | 0.877347  | 2.535381  |

@mg15-isomer39 bp86/6-31G(d) Etot=-3001.307793 Eb=-10.97

|      |           |           |           |
|------|-----------|-----------|-----------|
| Mg1  | 0.069417  | 0.381156  | -1.440141 |
| Mg2  | 1.608349  | -1.119123 | 0.902085  |
| Mg3  | 4.518115  | -0.936513 | 0.000208  |
| Mg4  | -1.353808 | -0.447818 | 1.338539  |
| Mg5  | -2.165065 | 2.434566  | -0.295220 |
| Mg6  | -3.068461 | -0.305038 | -1.430995 |
| Mg7  | 3.094248  | 1.644504  | -0.755025 |
| Mg8  | -4.327039 | 0.643659  | 1.181661  |
| Mg9  | 0.661964  | 2.019660  | 1.256716  |
| Mg10 | -0.754067 | -2.504529 | -0.779045 |
| Mg11 | -6.032007 | -1.201438 | -0.579671 |
| Mg12 | -3.578995 | -2.583388 | 0.731348  |
| Mg13 | 3.626024  | 1.018011  | 2.132675  |
| Mg14 | 0.611453  | 3.513160  | -1.372749 |
| Mg15 | 7.089871  | -2.556869 | -0.890384 |

@mg16-isomer01 bp86/6-31G(d) Etot=-3201.464716 Eb=-13.71

|      |           |           |           |
|------|-----------|-----------|-----------|
| Mg1  | 3.441196  | -1.431645 | 1.054762  |
| Mg2  | -3.542789 | -0.000049 | -0.000056 |
| Mg3  | 0.362527  | -0.205351 | -1.834573 |
| Mg4  | 0.362673  | -1.486568 | 1.095671  |
| Mg5  | 0.362701  | 1.692187  | 0.739790  |
| Mg6  | 1.924621  | 0.338638  | 3.023469  |
| Mg7  | 1.924109  | 2.449223  | -1.804846 |
| Mg8  | 1.924345  | -2.787705 | -1.218709 |
| Mg9  | -2.813666 | 2.758254  | 1.205885  |
| Mg10 | -2.813642 | -0.334889 | -2.991741 |
| Mg11 | -2.813791 | -2.423496 | 1.785702  |
| Mg12 | -1.733466 | 0.281623  | 2.517718  |
| Mg13 | -1.733653 | 2.039581  | -1.502899 |
| Mg14 | -1.733427 | -2.321324 | -1.014769 |
| Mg15 | 3.441110  | 1.629369  | 0.711938  |
| Mg16 | 3.441155  | -0.197849 | -1.767343 |

@mg16-isomer02 bp86/6-31G(d) Etot=-3201.464233 Eb=-13.69

|      |           |           |           |
|------|-----------|-----------|-----------|
| Mg1  | 1.030505  | -2.793023 | 0.725996  |
| Mg2  | 0.658632  | 0.062197  | -0.453691 |
| Mg3  | -3.444560 | 1.302232  | 0.995013  |
| Mg4  | 1.408753  | -0.363187 | 2.600676  |
| Mg5  | -2.110249 | 3.799148  | -0.387292 |
| Mg6  | 0.761821  | 2.928475  | -1.210597 |
| Mg7  | -0.463675 | 2.005696  | 1.593761  |
| Mg8  | -1.524336 | -0.991203 | 1.575546  |
| Mg9  | 2.400986  | -1.874243 | -1.941558 |
| Mg10 | -1.988124 | 1.034484  | -1.674584 |
| Mg11 | -0.862004 | -2.050266 | -1.874094 |
| Mg12 | -3.569733 | -1.353933 | -0.675946 |
| Mg13 | 3.303956  | 1.095456  | -1.629999 |
| Mg14 | 2.705921  | 1.978747  | 1.221345  |
| Mg15 | -1.957056 | -3.829211 | 0.392214  |
| Mg16 | 3.649163  | -0.951369 | 0.743209  |

@mg16-isomer03 bp86/6-31G(d) Etot=-3201.459142 Eb=-13.49

|      |           |           |           |
|------|-----------|-----------|-----------|
| Mg1  | -0.179953 | 0.762448  | -1.665726 |
| Mg2  | -2.262343 | -1.224059 | -2.658362 |
| Mg3  | -0.690280 | -2.017534 | 0.003152  |
| Mg4  | 1.092582  | -1.965672 | -2.630969 |
| Mg5  | -3.308833 | 1.469118  | -1.613087 |
| Mg6  | -0.183883 | 0.769229  | 1.660312  |
| Mg7  | 4.777137  | 2.053936  | -0.001200 |
| Mg8  | 1.779901  | 2.362597  | -0.003804 |
| Mg9  | -1.423264 | 3.128555  | -0.006331 |
| Mg10 | -2.264909 | -1.211875 | 2.663644  |
| Mg11 | 3.028971  | 0.025962  | -1.577930 |
| Mg12 | 1.088009  | -1.953250 | 2.638795  |
| Mg13 | 2.487175  | -2.588164 | 0.007191  |
| Mg14 | 3.025909  | 0.032346  | 1.578594  |
| Mg15 | -3.654016 | -1.119120 | 0.001460  |
| Mg16 | -3.312204 | 1.475484  | 1.604263  |

@mg16-isomer04 bp86/6-31G(d) Etot=-3201.458995 Eb=-13.49

|      |           |           |           |
|------|-----------|-----------|-----------|
| Mg1  | -3.902971 | -0.585419 | 0.556227  |
| Mg2  | -2.510146 | 1.204298  | 2.639872  |
| Mg3  | 2.929354  | 1.666560  | 1.579003  |
| Mg4  | -2.832748 | 2.150511  | -0.188068 |
| Mg5  | -2.844098 | -0.052295 | -2.267830 |
| Mg6  | 2.934002  | -2.103367 | -1.948361 |
| Mg7  | 1.489649  | -0.612859 | 2.919442  |
| Mg8  | -0.046750 | 0.800427  | 0.601055  |
| Mg9  | 3.674682  | -1.150817 | 0.860972  |
| Mg10 | 2.658924  | 0.781911  | -1.447180 |
| Mg11 | 0.902167  | -2.345722 | 0.369728  |
| Mg12 | 1.788348  | 3.441152  | -0.509017 |
| Mg13 | -1.531080 | -1.585631 | 1.995295  |
| Mg14 | -2.189386 | -2.660207 | -0.812475 |
| Mg15 | 0.056148  | -0.969874 | -2.187939 |
| Mg16 | -0.576095 | 2.021331  | -2.160725 |

@mg16-isomer05 bp86/6-31G(d) Etot=-3201.458660 Eb=-13.47

|      |           |           |           |
|------|-----------|-----------|-----------|
| Mg1  | 0.581581  | 0.066537  | 0.000123  |
| Mg2  | 3.820799  | -0.902595 | -0.000065 |
| Mg3  | -1.099721 | -1.734637 | 1.651626  |
| Mg4  | 2.165679  | -1.187013 | 2.578547  |
| Mg5  | 1.571362  | -2.794319 | 0.000047  |
| Mg6  | -1.099630 | -1.734691 | -1.651471 |
| Mg7  | -0.848593 | 1.377044  | 2.437798  |
| Mg8  | 2.846048  | 1.547724  | -1.570025 |
| Mg9  | -3.523005 | -2.386615 | -0.000008 |
| Mg10 | -2.428863 | 2.568900  | -0.000100 |

|      |           |           |           |
|------|-----------|-----------|-----------|
| Mg11 | -0.848312 | 1.376902  | -2.437753 |
| Mg12 | -3.410876 | 0.224154  | -1.572116 |
| Mg13 | 0.672817  | 2.993698  | 0.000052  |
| Mg14 | 2.165530  | -1.187017 | -2.578537 |
| Mg15 | -3.410989 | 0.224193  | 1.571931  |
| Mg16 | 2.846173  | 1.547734  | 1.569951  |

@mg16-isomer06 bp86/6-31G(d) Etot=-3201.458249 Eb=-13.46

|      |           |           |           |
|------|-----------|-----------|-----------|
| Mg1  | -3.687653 | 0.720909  | -0.905992 |
| Mg2  | -1.471383 | 2.719463  | -1.187771 |
| Mg3  | -0.848721 | -0.455158 | 2.910613  |
| Mg4  | 1.727076  | 1.435987  | -2.508357 |
| Mg5  | -2.484958 | 1.789013  | 1.669850  |
| Mg6  | 1.981206  | -1.592244 | 1.583402  |
| Mg7  | 1.574218  | -1.500583 | -1.722502 |
| Mg8  | 3.955157  | -2.678538 | -0.399704 |
| Mg9  | -3.344754 | -2.213651 | -1.424831 |
| Mg10 | -0.885520 | -2.194189 | 0.233621  |
| Mg11 | 2.258317  | 1.252207  | 2.532444  |
| Mg12 | 0.171339  | 0.668754  | 0.269126  |
| Mg13 | -3.432732 | -1.130497 | 1.583732  |
| Mg14 | 2.177773  | 3.031894  | 0.018128  |
| Mg15 | -1.252756 | -0.218928 | -2.396317 |
| Mg16 | 3.563391  | 0.365560  | -0.255441 |

@mg16-isomer07 bp86/6-31G(d) Etot=-3201.458040 Eb=-13.45

|      |           |           |           |
|------|-----------|-----------|-----------|
| Mg1  | 1.426002  | -3.306331 | 0.748576  |
| Mg2  | -1.571821 | -3.547700 | 0.010598  |
| Mg3  | 2.402779  | 0.750961  | -2.197516 |
| Mg4  | 0.665072  | -1.733861 | -1.779176 |
| Mg5  | 3.476549  | 1.445644  | 0.569273  |
| Mg6  | -0.463027 | 0.962975  | -1.260637 |
| Mg7  | -2.433330 | 1.367600  | 1.942791  |
| Mg8  | -3.511095 | 1.307195  | -0.908318 |
| Mg9  | -2.443302 | -1.348765 | -1.946063 |
| Mg10 | -1.538828 | 3.557189  | -0.012915 |
| Mg11 | -0.476654 | -0.956382 | 1.257269  |
| Mg12 | -3.523651 | -1.279447 | 0.906975  |
| Mg13 | 2.387049  | -0.770168 | 2.194745  |
| Mg14 | 3.463848  | -1.476159 | -0.565401 |
| Mg15 | 0.680027  | 1.731316  | 1.781879  |
| Mg16 | 1.460383  | 3.295932  | -0.742080 |

@mg16-isomer08 bp86/6-31G(d) Etot=-3201.457941 Eb=-13.44

|      |           |           |           |
|------|-----------|-----------|-----------|
| Mg1  | 0.015798  | 1.577327  | -2.479584 |
| Mg2  | 0.009302  | 0.157244  | 0.063107  |
| Mg3  | 1.534976  | -1.569456 | 2.029340  |
| Mg4  | 1.692094  | 1.708035  | 2.003447  |
| Mg5  | -3.816264 | -0.121484 | 0.598866  |
| Mg6  | 3.789964  | -0.125678 | 0.648544  |
| Mg7  | 2.582252  | 2.253017  | -0.861756 |
| Mg8  | 3.021150  | -2.967532 | -0.287910 |
| Mg9  | 2.208268  | -0.604543 | -1.983279 |
| Mg10 | -1.722733 | 1.706359  | 1.981034  |
| Mg11 | -0.002904 | 3.687385  | 0.270605  |
| Mg12 | -2.163708 | -0.628503 | -1.984725 |
| Mg13 | -2.576355 | 2.243424  | -0.897173 |
| Mg14 | -3.004641 | -2.982375 | -0.284742 |
| Mg15 | -1.577243 | -1.537568 | 2.031084  |
| Mg16 | 0.010045  | -2.795651 | -0.846858 |

@mg16-isomer09 bp86/6-31G(d) Etot=-3201.453783 Eb=-13.28

|     |           |           |           |
|-----|-----------|-----------|-----------|
| Mg1 | 0.041740  | -0.355267 | 0.338303  |
| Mg2 | -2.695459 | 0.527955  | -1.328589 |

|      |           |           |           |
|------|-----------|-----------|-----------|
| Mg3  | 0.805046  | 2.849844  | 0.627693  |
| Mg4  | 3.194032  | 1.654386  | -0.857799 |
| Mg5  | -1.609329 | 3.591936  | -1.239451 |
| Mg6  | 4.315773  | -0.946233 | 0.262118  |
| Mg7  | 2.336286  | -1.126784 | -1.951418 |
| Mg8  | -0.498523 | 0.931791  | 2.878062  |
| Mg9  | 2.453131  | 0.646251  | 1.991863  |
| Mg10 | -0.670399 | -1.671226 | -2.233738 |
| Mg11 | 0.361388  | 1.367221  | -2.111423 |
| Mg12 | -2.838763 | -0.910850 | 1.598061  |
| Mg13 | -2.733234 | 2.134771  | 1.223321  |
| Mg14 | 1.914525  | -2.706239 | 0.850782  |
| Mg15 | -3.303084 | -2.522871 | -0.935637 |
| Mg16 | -1.073131 | -3.464686 | 0.887852  |

@mg16-isomer10 bp86/6-31G(d) Etot=-3201.450791 Eb=-13.16

|      |           |           |           |
|------|-----------|-----------|-----------|
| Mg1  | -1.629312 | 0.205579  | 2.531979  |
| Mg2  | 0.928446  | 0.616665  | 1.062244  |
| Mg3  | 2.016522  | 3.410634  | 0.168708  |
| Mg4  | 3.071508  | -1.638169 | 0.701832  |
| Mg5  | -0.083602 | -2.198365 | 1.271746  |
| Mg6  | -1.444798 | -3.226070 | -1.305787 |
| Mg7  | -1.672724 | -0.256329 | -1.040759 |
| Mg8  | 3.909231  | 1.251998  | 1.598232  |
| Mg9  | -3.924766 | 1.135622  | 0.776149  |
| Mg10 | -3.188876 | -1.945428 | 1.018911  |
| Mg11 | -2.981580 | 2.323712  | -1.911510 |
| Mg12 | 3.247722  | 1.016649  | -1.322797 |
| Mg13 | -1.248959 | 2.702494  | 0.618429  |
| Mg14 | 0.328051  | 1.908176  | -1.898760 |
| Mg15 | 1.149622  | -1.239003 | -1.652654 |
| Mg16 | 1.523514  | -4.068166 | -0.615963 |

@mg16-isomer11 bp86/6-31G(d) Etot=-3201.446702 Eb=-13.00

|      |           |           |           |
|------|-----------|-----------|-----------|
| Mg1  | -2.739130 | -1.306860 | 0.726026  |
| Mg2  | 2.937229  | -1.930659 | -0.736967 |
| Mg3  | 3.569580  | 1.064463  | -1.377291 |
| Mg4  | -4.428458 | 0.890893  | -0.902383 |
| Mg5  | -2.950656 | 1.733331  | 1.533485  |
| Mg6  | -0.929876 | -3.117224 | -1.008398 |
| Mg7  | -2.356419 | -0.801455 | -2.230151 |
| Mg8  | 1.238936  | 3.034858  | -1.489828 |
| Mg9  | 0.488915  | -0.118353 | -1.439067 |
| Mg10 | 0.544620  | -1.626011 | 1.317786  |
| Mg11 | 0.143070  | 1.668560  | 1.191715  |
| Mg12 | -1.650362 | 2.136785  | -1.310890 |
| Mg13 | -1.461120 | -0.264138 | 3.179700  |
| Mg14 | 1.536460  | -4.532742 | 0.106270  |
| Mg15 | 3.034365  | 3.087626  | 0.877299  |
| Mg16 | 3.022847  | 0.080925  | 1.562695  |

@mg16-isomer12 bp86/6-31G(d) Etot=-3201.445957 Eb=-12.97

|      |           |           |           |
|------|-----------|-----------|-----------|
| Mg1  | 0.975837  | -1.395167 | -1.481029 |
| Mg2  | 0.320378  | -2.382645 | 1.571375  |
| Mg3  | -4.185367 | -0.477890 | -0.796197 |
| Mg4  | 3.224950  | -2.033969 | 0.505446  |
| Mg5  | -1.052314 | -0.047297 | 0.436112  |
| Mg6  | 0.491094  | 1.798489  | -1.545412 |
| Mg7  | -2.024019 | -2.689990 | -0.978146 |
| Mg8  | -1.763978 | -0.179820 | -2.641699 |
| Mg9  | -2.734236 | 2.216828  | -1.017275 |
| Mg10 | -0.451586 | 2.564124  | 1.560491  |
| Mg11 | 2.420089  | 3.074237  | 0.494555  |
| Mg12 | -3.480953 | 1.220697  | 1.718273  |

|      |           |           |           |
|------|-----------|-----------|-----------|
| Mg13 | -3.009672 | -1.909836 | 1.776152  |
| Mg14 | 6.059906  | -0.725494 | -0.119558 |
| Mg15 | 1.894409  | 0.381548  | 1.673753  |
| Mg16 | 3.315462  | 0.586184  | -1.156841 |

@mg16-isomer13 bp86/6-31G(d) Etot=-3201.443499 Eb=-12.88

|      |           |           |           |
|------|-----------|-----------|-----------|
| Mg1  | -4.518794 | 0.223587  | 1.895475  |
| Mg2  | -1.247536 | 3.150231  | -0.480125 |
| Mg3  | 2.945146  | -0.481834 | 2.874887  |
| Mg4  | -1.668632 | 1.076390  | 1.751321  |
| Mg5  | 2.642473  | -2.888486 | 0.532804  |
| Mg6  | -2.522692 | -1.789825 | -2.527258 |
| Mg7  | 2.144562  | 1.674736  | -1.863502 |
| Mg8  | 0.250469  | -1.357911 | 1.712488  |
| Mg9  | -2.726872 | -1.888385 | 0.499434  |
| Mg10 | -3.419469 | 0.827585  | -0.906380 |
| Mg11 | 3.683898  | -0.103682 | -0.000969 |
| Mg12 | -0.336817 | 0.059590  | -0.975267 |
| Mg13 | 2.082549  | -1.464216 | -2.207011 |
| Mg14 | 1.474934  | 4.417672  | -0.623247 |
| Mg15 | -0.144530 | -3.067418 | -0.814679 |
| Mg16 | 1.361310  | 1.611964  | 1.132029  |

@mg16-isomer14 bp86/6-31G(d) Etot=-3201.443363 Eb=-12.87

|      |           |           |           |
|------|-----------|-----------|-----------|
| Mg1  | 4.448308  | 0.053653  | 0.362653  |
| Mg2  | 0.611377  | 1.960819  | -0.194384 |
| Mg3  | 0.615336  | -1.364339 | -0.862874 |
| Mg4  | 2.440160  | 1.402712  | 2.269607  |
| Mg5  | 3.470094  | 2.876928  | -0.276116 |
| Mg6  | -2.272651 | -2.202290 | -1.519048 |
| Mg7  | -3.880634 | 0.521151  | -1.598266 |
| Mg8  | -0.346815 | 0.022369  | 1.961466  |
| Mg9  | -3.276453 | -0.846884 | 1.218584  |
| Mg10 | 2.243261  | -1.703670 | 1.782799  |
| Mg11 | -1.087312 | -2.918947 | 1.218373  |
| Mg12 | -0.938614 | 0.622633  | -2.430324 |
| Mg13 | -5.623530 | 1.285376  | 0.861066  |
| Mg14 | -2.396113 | 2.022710  | 0.511195  |
| Mg15 | 2.561845  | 0.576774  | -2.215580 |
| Mg16 | 3.431744  | -2.308996 | -1.089150 |

@mg16-isomer15 bp86/6-31G(d) Etot=-3201.441165 Eb=-12.79

|      |           |           |           |
|------|-----------|-----------|-----------|
| Mg1  | -0.389530 | -0.045177 | -1.275145 |
| Mg2  | -0.226101 | 1.575657  | 1.548164  |
| Mg3  | 1.955625  | 1.903059  | -0.625515 |
| Mg4  | -2.982289 | -0.433593 | 1.688141  |
| Mg5  | -2.372794 | -2.277871 | -0.674500 |
| Mg6  | 1.384065  | -2.554733 | -1.227322 |
| Mg7  | 3.804547  | -0.749951 | -0.609115 |
| Mg8  | -0.061280 | -1.548855 | 1.475345  |
| Mg9  | -3.089519 | 2.661333  | 1.164067  |
| Mg10 | 4.859570  | 1.862378  | 0.541273  |
| Mg11 | -1.299982 | 2.923493  | -1.251208 |
| Mg12 | 2.504200  | 0.340428  | 2.017683  |
| Mg13 | 2.081235  | -0.095919 | -2.952224 |
| Mg14 | -3.497848 | 0.688140  | -1.246587 |
| Mg15 | 2.722395  | -2.707295 | 1.525925  |
| Mg16 | -5.392295 | -1.541094 | -0.098982 |

@mg16-isomer16 bp86/6-31G(d) Etot=-3201.434989 Eb=-12.54

|     |           |           |           |
|-----|-----------|-----------|-----------|
| Mg1 | -3.013916 | -1.238740 | -0.742176 |
| Mg2 | -0.783897 | 1.477466  | 1.499024  |
| Mg3 | 1.539731  | -5.060679 | -0.626008 |
| Mg4 | 0.051637  | -0.174204 | -1.089607 |

|      |           |           |           |
|------|-----------|-----------|-----------|
| Mg5  | 3.593951  | 2.967311  | -0.208658 |
| Mg6  | -5.001414 | 1.081685  | -1.675082 |
| Mg7  | 2.370593  | -2.109000 | -1.072268 |
| Mg8  | 0.736015  | 2.839105  | -0.780161 |
| Mg9  | -0.718846 | -3.103171 | 0.028803  |
| Mg10 | 2.054469  | 1.914780  | 2.308344  |
| Mg11 | 3.568793  | 0.048037  | 0.534876  |
| Mg12 | -3.892897 | 0.949191  | 1.260752  |
| Mg13 | -2.116791 | 1.970209  | -1.229307 |
| Mg14 | 2.653607  | 0.901611  | -2.318101 |
| Mg15 | 1.064141  | -0.999540 | 1.869338  |
| Mg16 | -2.105176 | -1.464061 | 2.240229  |

@mg16-isomer17 bp86/6-31G(d) Etot=-3201.432908 Eb=-12.46

|      |           |           |           |
|------|-----------|-----------|-----------|
| Mg1  | 2.362914  | -1.578014 | -1.581754 |
| Mg2  | 4.525020  | -0.005652 | -0.060744 |
| Mg3  | 2.367138  | 1.575345  | -1.578915 |
| Mg4  | -2.840987 | -1.593808 | -0.182365 |
| Mg5  | -1.140775 | 0.003627  | 2.027902  |
| Mg6  | -5.679529 | -0.008530 | -0.415549 |
| Mg7  | -0.874203 | 2.803193  | -2.203043 |
| Mg8  | 0.322276  | 2.415366  | 0.705798  |
| Mg9  | -2.845179 | 1.600422  | -0.181275 |
| Mg10 | 1.872485  | -0.000385 | 1.668622  |
| Mg11 | 0.313492  | -2.414346 | 0.707895  |
| Mg12 | -4.196542 | 0.004782  | 2.158826  |
| Mg13 | 3.454077  | -2.640294 | 1.159745  |
| Mg14 | -0.240242 | 0.002003  | -1.176572 |
| Mg15 | -0.871719 | -2.796103 | -2.205844 |
| Mg16 | 3.471773  | 2.632394  | 1.157273  |

@mg16-isomer18 bp86/6-31G(d) Etot=-3201.431513 Eb=-12.41

|      |           |           |           |
|------|-----------|-----------|-----------|
| Mg1  | -3.518220 | 0.110286  | -1.464408 |
| Mg2  | -0.026613 | 0.328028  | -1.260718 |
| Mg3  | 4.790033  | -0.321005 | 0.469984  |
| Mg4  | 0.151138  | -2.520416 | 0.306284  |
| Mg5  | 1.985412  | 0.413179  | -3.572617 |
| Mg6  | 3.177465  | -2.733066 | 1.280950  |
| Mg7  | -2.338936 | 2.687211  | -0.064053 |
| Mg8  | -2.857176 | -2.682970 | 0.023337  |
| Mg9  | 2.919649  | 1.672458  | -1.011497 |
| Mg10 | 3.548896  | 2.087208  | 1.839770  |
| Mg11 | -5.088356 | 1.584349  | 0.674206  |
| Mg12 | 0.575508  | 2.475187  | 0.916487  |
| Mg13 | 2.577357  | -1.522160 | -1.358525 |
| Mg14 | 1.506139  | -0.228252 | 1.636813  |
| Mg15 | -1.860141 | -0.018886 | 1.248957  |
| Mg16 | -5.542156 | -1.331152 | 0.335031  |

@mg16-isomer19 bp86/6-31G(d) Etot=-3201.431453 Eb=-12.41

|      |           |           |           |
|------|-----------|-----------|-----------|
| Mg1  | 1.277321  | 0.353452  | 1.294530  |
| Mg2  | 3.435599  | -2.176182 | 0.717092  |
| Mg3  | -1.123409 | 1.059459  | 3.008970  |
| Mg4  | 0.735092  | -2.011469 | -0.925644 |
| Mg5  | -1.128603 | -1.562202 | 1.402107  |
| Mg6  | -4.110988 | -2.292373 | 0.976090  |
| Mg7  | -2.160941 | -1.217467 | -1.473433 |
| Mg8  | 3.067245  | 0.043378  | -1.555169 |
| Mg9  | 0.076756  | 0.927511  | -1.927382 |
| Mg10 | 5.797882  | -1.148804 | -0.831929 |
| Mg11 | -2.881146 | 1.755547  | -1.824980 |
| Mg12 | -3.412635 | 0.692690  | 1.025687  |
| Mg13 | -5.138683 | -0.551807 | -1.229761 |
| Mg14 | 2.141821  | 2.768691  | -0.214565 |

|      |           |          |          |
|------|-----------|----------|----------|
| Mg15 | -0.919987 | 2.584715 | 0.435373 |
| Mg16 | 4.344675  | 0.774861 | 1.123016 |

@mg16-isomer20 bp86/6-31G(d) Etot=-3201.424242 Eb=-12.12

|      |           |           |           |
|------|-----------|-----------|-----------|
| Mg1  | 0.919618  | -0.219292 | 1.186709  |
| Mg2  | -1.449091 | 1.690560  | 1.550229  |
| Mg3  | 3.259469  | -2.119941 | 0.577860  |
| Mg4  | 0.774831  | -3.074011 | 2.102328  |
| Mg5  | -1.923512 | -1.482500 | 1.133205  |
| Mg6  | -5.085866 | -1.819038 | 0.466301  |
| Mg7  | -1.936154 | 3.241088  | -0.941946 |
| Mg8  | 3.816967  | 0.942713  | 0.979299  |
| Mg9  | 1.213200  | 2.401501  | -0.340206 |
| Mg10 | -0.115239 | 4.750736  | 1.032531  |
| Mg11 | 2.238960  | -0.167798 | -1.810778 |
| Mg12 | -3.662720 | 0.652344  | -0.442772 |
| Mg13 | 0.242273  | -2.521462 | -0.871560 |
| Mg14 | -0.750595 | 0.251568  | -1.706322 |
| Mg15 | 5.312992  | -0.428197 | -1.199237 |
| Mg16 | -2.855133 | -2.098271 | -1.715641 |

@mg16-isomer21 bp86/6-31G(d) Etot=-3201.420679 Eb=-11.98

|      |           |           |           |
|------|-----------|-----------|-----------|
| Mg1  | -3.436694 | -0.222219 | -1.386624 |
| Mg2  | 2.863776  | -0.941598 | -1.794470 |
| Mg3  | -6.425709 | -0.018069 | -0.375473 |
| Mg4  | 4.007463  | -0.926882 | 1.128152  |
| Mg5  | -1.401901 | 2.071706  | -0.444928 |
| Mg6  | 1.028925  | 0.347357  | 0.867488  |
| Mg7  | -4.690526 | -2.006997 | 1.051519  |
| Mg8  | 3.009795  | 1.763859  | 2.525728  |
| Mg9  | -0.250104 | -0.755577 | -1.686669 |
| Mg10 | 0.999493  | -2.722353 | 0.418896  |
| Mg11 | -1.635730 | -1.002707 | 1.049703  |
| Mg12 | 1.331379  | 1.765898  | -2.310904 |
| Mg13 | 1.172821  | 3.491090  | 0.317766  |
| Mg14 | 3.769465  | -3.675660 | -0.148776 |
| Mg15 | 3.723911  | 1.691023  | -0.436210 |
| Mg16 | -4.066365 | 1.141129  | 1.224802  |

@mg16-isomer22 bp86/6-31G(d) Etot=-3201.419627 Eb=-11.94

|      |           |           |           |
|------|-----------|-----------|-----------|
| Mg1  | 1.643708  | -0.220472 | 1.549710  |
| Mg2  | 0.118033  | 2.365470  | -0.002143 |
| Mg3  | 1.638399  | -0.224624 | -1.547997 |
| Mg4  | 3.497955  | 1.823435  | -0.003331 |
| Mg5  | 1.855012  | 2.687778  | -2.507238 |
| Mg6  | -1.063616 | -0.829658 | 0.005559  |
| Mg7  | -3.650365 | 0.242288  | -1.538402 |
| Mg8  | 4.330907  | -1.131277 | -0.002126 |
| Mg9  | -0.906947 | 1.199547  | 2.617577  |
| Mg10 | -3.647625 | 0.295472  | 1.509079  |
| Mg11 | -6.266691 | -0.566740 | 0.000914  |
| Mg12 | 4.048686  | -4.208225 | -0.000344 |
| Mg13 | 1.861864  | 2.695133  | 2.501777  |
| Mg14 | -0.914438 | 1.190480  | -2.619635 |
| Mg15 | 1.310883  | -2.863799 | 0.004753  |
| Mg16 | -3.855766 | -2.454809 | 0.031846  |

@mg17-isomer01 bp86/6-31G(d) Etot=-3401.582481 Eb=-14.68

|     |           |           |           |
|-----|-----------|-----------|-----------|
| Mg1 | -1.345089 | -3.451999 | -0.601941 |
| Mg2 | 2.008285  | 0.881402  | -2.141075 |
| Mg3 | -0.795697 | -2.036344 | 2.143372  |
| Mg4 | -2.005359 | -0.881103 | -2.142759 |
| Mg5 | 2.039259  | -0.796665 | 2.142058  |
| Mg6 | 0.879714  | -2.000008 | -2.143542 |

|      |           |           |           |
|------|-----------|-----------|-----------|
| Mg7  | 3.392981  | 1.489162  | 0.606143  |
| Mg8  | 0.791995  | 2.037359  | 2.144407  |
| Mg9  | -3.396170 | -1.490338 | 0.602172  |
| Mg10 | 1.347526  | 3.453926  | -0.600658 |
| Mg11 | -0.875751 | 2.000003  | -2.143310 |
| Mg12 | 3.454786  | -1.347666 | -0.602663 |
| Mg13 | -2.042474 | 0.796128  | 2.141113  |
| Mg14 | -3.453297 | 1.347132  | -0.605421 |
| Mg15 | -1.490011 | 3.394188  | 0.599654  |
| Mg16 | 1.489227  | -3.394802 | 0.602131  |
| Mg17 | 0.000074  | -0.000376 | 0.000321  |

@mg17-isomer02 bp86/6-31G(d) Etot=-3401.572397 Eb=-14.31

|      |           |           |           |
|------|-----------|-----------|-----------|
| Mg1  | -0.044754 | -0.017622 | -0.016256 |
| Mg2  | -0.187086 | 2.253470  | 2.022737  |
| Mg3  | -2.928908 | -1.397114 | -1.356588 |
| Mg4  | 2.464343  | -0.524287 | 1.937198  |
| Mg5  | -0.274606 | -0.684811 | -2.785667 |
| Mg6  | 2.079128  | 1.235113  | -2.012378 |
| Mg7  | -2.366692 | 1.586581  | -1.826411 |
| Mg8  | -2.211138 | -2.806751 | 1.200134  |
| Mg9  | 2.584420  | 2.423075  | 0.788421  |
| Mg10 | 2.222379  | -1.925439 | -1.239709 |
| Mg11 | 4.308717  | 0.101031  | -0.290104 |
| Mg12 | -0.566409 | -3.423625 | -1.286850 |
| Mg13 | 0.896813  | -3.140149 | 1.326369  |
| Mg14 | -2.578790 | 3.380490  | 0.526610  |
| Mg15 | -2.967211 | 0.399870  | 1.226880  |
| Mg16 | -0.535712 | -0.792477 | 2.745235  |
| Mg17 | 0.105507  | 3.332645  | -0.959619 |

@mg17-isomer03 bp86/6-31G(d) Etot=-3401.570567 Eb=-14.24

|      |           |           |           |
|------|-----------|-----------|-----------|
| Mg1  | -0.338321 | -1.568412 | 2.337863  |
| Mg2  | 2.220430  | -2.647778 | 0.821798  |
| Mg3  | 0.230909  | 0.022563  | -0.107385 |
| Mg4  | -2.694191 | -2.968597 | 1.191853  |
| Mg5  | -2.631899 | 1.620206  | -1.539346 |
| Mg6  | -0.671305 | -0.295444 | -2.855692 |
| Mg7  | -0.176959 | 1.772185  | 2.251572  |
| Mg8  | -0.061758 | 3.345608  | -0.867141 |
| Mg9  | 2.491481  | 2.461530  | 0.647575  |
| Mg10 | 2.040964  | 1.414139  | -2.152052 |
| Mg11 | -2.419247 | 3.283918  | 0.977440  |
| Mg12 | 2.389782  | -0.047130 | 2.390625  |
| Mg13 | 2.001617  | -1.747883 | -2.029336 |
| Mg14 | 3.900377  | -0.201512 | -0.216538 |
| Mg15 | -3.050583 | -1.430911 | -1.376047 |
| Mg16 | -0.444052 | -3.203912 | -0.776494 |
| Mg17 | -2.787245 | 0.191430  | 1.301305  |

@mg17-isomer04 bp86/6-31G(d) Etot=-3401.566267 Eb=-14.08

|      |           |           |           |
|------|-----------|-----------|-----------|
| Mg1  | -0.145961 | 0.072734  | -0.717228 |
| Mg2  | 2.525445  | -1.769569 | 0.373559  |
| Mg3  | -1.557191 | -2.247677 | -2.081945 |
| Mg4  | 1.225426  | 0.485815  | 2.060696  |
| Mg5  | 0.548413  | 2.826059  | -1.952097 |
| Mg6  | 2.352756  | 3.006763  | 0.467947  |
| Mg7  | -1.721619 | -0.108887 | 1.954415  |
| Mg8  | -2.461432 | 2.596663  | -1.520892 |
| Mg9  | 0.294890  | -2.483209 | 2.279226  |
| Mg10 | 4.148478  | 0.708615  | 1.184626  |
| Mg11 | -0.662620 | 2.825107  | 1.083626  |
| Mg12 | -3.341042 | -0.264505 | -0.690602 |
| Mg13 | 0.399812  | -3.933502 | -0.374155 |



|      |           |           |           |
|------|-----------|-----------|-----------|
| Mg14 | 1.436305  | -1.768719 | -2.422992 |
| Mg15 | -3.668409 | 2.173079  | 1.191304  |
| Mg16 | 2.901390  | 0.774808  | -1.603707 |
| Mg17 | -2.274643 | -2.893574 | 0.768219  |

@mg17-isomer05 bp86/6-31G(d) Etot=-3401.561595 Eb=-13.91

|      |           |           |           |
|------|-----------|-----------|-----------|
| Mg1  | 0.923258  | -0.400499 | -2.507065 |
| Mg2  | 0.629412  | -2.225751 | 1.484602  |
| Mg3  | 2.212639  | -2.929534 | -1.047374 |
| Mg4  | 3.613457  | -1.907572 | 1.458607  |
| Mg5  | 0.912522  | 3.705400  | 0.996827  |
| Mg6  | -2.223658 | 0.430470  | -2.134625 |
| Mg7  | -0.157389 | 0.559528  | -0.019126 |
| Mg8  | 3.627549  | -0.133492 | -0.965377 |
| Mg9  | -3.353933 | 0.285943  | 0.828616  |
| Mg10 | 2.057736  | 2.414493  | -1.443560 |
| Mg11 | 2.316501  | 0.920519  | 1.709243  |
| Mg12 | -1.902165 | 2.925360  | 1.328960  |
| Mg13 | -3.778157 | -2.024136 | -1.078040 |
| Mg14 | -0.856384 | 3.316902  | -1.576736 |
| Mg15 | -0.826020 | -2.585081 | -1.264820 |
| Mg16 | -2.327131 | -2.557963 | 1.513317  |
| Mg17 | -0.868240 | 0.205412  | 2.716552  |

@mg17-isomer06 bp86/6-31G(d) Etot=-3401.560659 Eb=-13.87

|      |           |           |           |
|------|-----------|-----------|-----------|
| Mg1  | -1.522362 | 0.639789  | 1.916140  |
| Mg2  | -3.798658 | -0.030517 | -0.000050 |
| Mg3  | -1.522231 | 0.639949  | -1.916048 |
| Mg4  | 1.522368  | 0.639772  | -1.916130 |
| Mg5  | 3.798662  | -0.030543 | 0.000064  |
| Mg6  | 1.522236  | 0.639947  | 1.916046  |
| Mg7  | -2.743192 | -2.414017 | -1.537942 |
| Mg8  | 0.000061  | -2.092288 | -2.827080 |
| Mg9  | 2.743211  | -2.414264 | -1.537701 |
| Mg10 | 2.743166  | -2.414042 | 1.537941  |
| Mg11 | -0.000072 | -2.092263 | 2.827086  |
| Mg12 | -2.743222 | -2.414246 | 1.537705  |
| Mg13 | -0.000011 | -1.322207 | -0.000001 |
| Mg14 | 2.491040  | 2.797679  | -0.000148 |
| Mg15 | 0.000088  | 3.534787  | 1.531017  |
| Mg16 | -2.491019 | 2.797693  | 0.000141  |
| Mg17 | -0.000064 | 3.534769  | -1.531040 |

@mg17-isomer07 bp86/6-31G(d) Etot=-3401.559621 Eb=-13.83

|      |           |           |           |
|------|-----------|-----------|-----------|
| Mg1  | -0.296557 | -0.250450 | 1.859728  |
| Mg2  | -0.260089 | 1.180588  | -0.892584 |
| Mg3  | -0.486662 | -1.994068 | -0.999409 |
| Mg4  | 1.677390  | -0.383020 | -2.584452 |
| Mg5  | -3.337147 | -0.006760 | 1.844274  |
| Mg6  | -1.586205 | 2.548250  | 1.490205  |
| Mg7  | 2.643157  | -3.040629 | -1.484353 |
| Mg8  | 1.846137  | 1.941026  | 1.407939  |
| Mg9  | -1.967028 | -0.180542 | -3.007523 |
| Mg10 | 3.340107  | -0.379033 | -0.064586 |
| Mg11 | 1.428910  | -2.715051 | 1.222484  |
| Mg12 | -1.945717 | -2.763301 | 1.546612  |
| Mg13 | 2.626816  | 2.352248  | -1.518293 |
| Mg14 | -3.361294 | 1.470756  | -0.834231 |
| Mg15 | 0.508251  | 4.305051  | -0.119676 |
| Mg16 | 2.732418  | -0.486065 | 2.926143  |
| Mg17 | -3.562487 | -1.599000 | -0.792279 |

@mg17-isomer08 bp86/6-31G(d) Etot=-3401.558788 Eb=-13.80

|     |           |          |          |
|-----|-----------|----------|----------|
| Mg1 | -0.773030 | 2.952805 | 1.790880 |
|-----|-----------|----------|----------|

|      |           |           |           |
|------|-----------|-----------|-----------|
| Mg2  | -0.916233 | 2.424925  | -1.319168 |
| Mg3  | 2.248644  | 2.045817  | 1.465259  |
| Mg4  | 2.390647  | 2.346119  | -1.709738 |
| Mg5  | 0.713841  | -0.163035 | -2.209710 |
| Mg6  | -0.532192 | -2.789890 | -0.916238 |
| Mg7  | 2.345562  | -2.780426 | -2.203674 |
| Mg8  | -2.284571 | -0.373609 | -1.818023 |
| Mg9  | -3.180899 | 1.389109  | 0.813177  |
| Mg10 | -0.231890 | 0.032284  | 0.776070  |
| Mg11 | 3.110346  | -0.398472 | -0.314805 |
| Mg12 | -4.975674 | -0.440100 | -0.775967 |
| Mg13 | 2.086522  | -0.818588 | 2.510095  |
| Mg14 | 1.101657  | 4.432095  | -0.024791 |
| Mg15 | -0.376081 | -2.753254 | 2.176333  |
| Mg16 | -2.986415 | -1.791507 | 1.031447  |
| Mg17 | 2.259767  | -3.314273 | 0.728852  |

@mg17-isomer09 bp86/6-31G(d) Etot=-3401.557482 Eb=-13.75

|      |           |           |           |
|------|-----------|-----------|-----------|
| Mg1  | -2.794921 | 0.807203  | 2.483449  |
| Mg2  | -2.082156 | -2.001555 | 1.270075  |
| Mg3  | 0.248532  | 0.155955  | 3.036931  |
| Mg4  | 3.275960  | -0.414769 | 2.581772  |
| Mg5  | -0.577591 | 0.453968  | 0.218864  |
| Mg6  | 1.703789  | -2.677271 | -1.870632 |
| Mg7  | -2.030756 | 1.308669  | -2.365298 |
| Mg8  | -2.724761 | 2.878081  | 0.236895  |
| Mg9  | 3.404593  | -0.447275 | -0.499954 |
| Mg10 | -0.650379 | -4.178586 | -0.426314 |
| Mg11 | 3.106329  | 2.399850  | -1.615872 |
| Mg12 | -3.788092 | 0.008726  | -0.266123 |
| Mg13 | -1.783831 | -1.684964 | -1.867805 |
| Mg14 | 1.207201  | -2.050729 | 1.016627  |
| Mg15 | 2.303712  | 2.038328  | 1.230678  |
| Mg16 | 0.207177  | 3.164415  | -0.853470 |
| Mg17 | 0.975195  | 0.239953  | -2.309823 |

@mg17-isomer10 bp86/6-31G(d) Etot=-3401.554738 Eb=-13.65

|      |           |           |           |
|------|-----------|-----------|-----------|
| Mg1  | 1.954207  | 1.098367  | 2.116054  |
| Mg2  | -1.952924 | 1.096138  | -2.116885 |
| Mg3  | -2.437209 | -1.971084 | 1.517656  |
| Mg4  | 2.437727  | -1.972955 | -1.515477 |
| Mg5  | 0.000002  | -0.271957 | 0.000534  |
| Mg6  | -1.954477 | 1.098351  | 2.115955  |
| Mg7  | 1.953157  | 1.096167  | -2.116781 |
| Mg8  | 2.436984  | -1.971104 | 1.517751  |
| Mg9  | -2.437430 | -1.973035 | -1.515586 |
| Mg10 | 3.860996  | 0.213067  | -0.000251 |
| Mg11 | -3.860998 | 0.213028  | -0.000631 |
| Mg12 | 0.000214  | -1.035708 | -3.010203 |
| Mg13 | -0.000205 | -1.031107 | 3.012003  |
| Mg14 | -0.000021 | 2.848928  | -0.000999 |
| Mg15 | 0.000029  | -3.578398 | 0.000585  |
| Mg16 | 2.996130  | 3.070672  | -0.001737 |
| Mg17 | -2.996182 | 3.070628  | -0.001988 |

@mg17-isomer11 bp86/6-31G(d) Etot=-3401.553766 Eb=-13.62

|     |           |           |           |
|-----|-----------|-----------|-----------|
| Mg1 | 0.800675  | 4.463441  | 0.202108  |
| Mg2 | -1.907164 | 3.148550  | 0.225201  |
| Mg3 | -2.872387 | 0.987746  | -1.605965 |
| Mg4 | -3.822606 | 0.758854  | 1.346646  |
| Mg5 | -3.577780 | -1.806154 | -0.453783 |
| Mg6 | 0.223216  | 0.722799  | -1.321274 |
| Mg7 | -1.740894 | -1.433465 | -2.853238 |
| Mg8 | -0.867835 | 0.693894  | 1.557642  |

|      |           |           |           |
|------|-----------|-----------|-----------|
| Mg9  | -0.539301 | -2.122890 | -0.095339 |
| Mg10 | -2.438477 | -1.810523 | 2.385145  |
| Mg11 | 1.405894  | -2.109805 | -2.583075 |
| Mg12 | 2.695964  | 2.701492  | -1.415905 |
| Mg13 | 3.225306  | -0.254440 | -1.107649 |
| Mg14 | 1.003827  | -1.469320 | 2.469876  |
| Mg15 | 2.090525  | 1.434746  | 1.251127  |
| Mg16 | 2.476567  | -2.985714 | 0.097650  |
| Mg17 | 3.844469  | -0.919212 | 1.900834  |

@mg17-isomer12 bp86/6-31G(d) Etot=-3401.552315 Eb=-13.56

|      |           |           |           |
|------|-----------|-----------|-----------|
| Mg1  | -2.306819 | 0.227149  | -3.252603 |
| Mg2  | -2.770382 | -1.709500 | -1.007442 |
| Mg3  | 2.202998  | -3.025067 | -0.300974 |
| Mg4  | 2.119346  | -1.391383 | 2.440013  |
| Mg5  | 0.248957  | -0.906086 | -1.648567 |
| Mg6  | -0.729506 | 2.191447  | -1.425025 |
| Mg7  | -0.487184 | -2.447319 | 1.002439  |
| Mg8  | -1.874499 | 2.907744  | 1.382825  |
| Mg9  | -2.672703 | -0.017382 | 1.919014  |
| Mg10 | 2.895939  | 1.604849  | 1.921336  |
| Mg11 | 3.969075  | -0.613408 | 0.167456  |
| Mg12 | -3.539708 | 1.294875  | -0.673462 |
| Mg13 | 3.094737  | -1.121763 | -2.661842 |
| Mg14 | -3.529478 | -2.892014 | 1.615445  |
| Mg15 | 0.921283  | 3.854685  | 0.605216  |
| Mg16 | 0.177996  | 0.541214  | 1.076002  |
| Mg17 | 2.279948  | 1.501960  | -1.159833 |

@mg17-isomer13 bp86/6-31G(d) Etot=-3401.549641 Eb=-13.47

|      |           |           |           |
|------|-----------|-----------|-----------|
| Mg1  | 0.830299  | 1.976420  | -1.757431 |
| Mg2  | 2.011357  | 1.988445  | 1.230974  |
| Mg3  | 1.711049  | -0.747825 | -2.849760 |
| Mg4  | -0.073566 | 4.141611  | 0.235999  |
| Mg5  | 3.552092  | 0.805227  | -1.098905 |
| Mg6  | -2.303329 | 2.329383  | -0.914796 |
| Mg7  | -0.889899 | 1.369744  | 1.743707  |
| Mg8  | 2.832180  | -2.080842 | -0.197130 |
| Mg9  | -1.683338 | -0.037029 | -2.857614 |
| Mg10 | 4.017032  | -0.186605 | 1.830469  |
| Mg11 | -0.089799 | -0.606768 | -0.372325 |
| Mg12 | 1.221504  | -1.054363 | 2.277370  |
| Mg13 | -3.695124 | 0.771799  | 2.239766  |
| Mg14 | -3.495186 | -0.374529 | -0.519545 |
| Mg15 | 0.273542  | -3.570938 | 0.540698  |
| Mg16 | -2.075092 | -1.820284 | 1.766341  |
| Mg17 | -2.143722 | -2.903445 | -1.297817 |

@mg17-isomer14 bp86/6-31G(d) Etot=-3401.548790 Eb=-13.43

|      |           |           |           |
|------|-----------|-----------|-----------|
| Mg1  | 1.457121  | 0.360014  | 2.266863  |
| Mg2  | -2.825656 | -2.463407 | 0.994553  |
| Mg3  | 2.744254  | 2.651380  | 0.561996  |
| Mg4  | 0.151206  | -1.931621 | 0.417061  |
| Mg5  | 0.387554  | 1.082764  | -0.615579 |
| Mg6  | -1.487476 | 0.440077  | 1.635833  |
| Mg7  | 4.051905  | -0.111888 | 0.896969  |
| Mg8  | -2.146432 | -2.245254 | -1.972822 |
| Mg9  | -1.833346 | 0.734219  | -2.798708 |
| Mg10 | -2.217084 | 2.769258  | -0.423643 |
| Mg11 | 3.064895  | 0.596994  | -1.905589 |
| Mg12 | 0.255050  | 4.472569  | 0.332364  |
| Mg13 | -3.662448 | 0.061041  | -0.570990 |
| Mg14 | 0.743677  | -1.276632 | -2.572848 |
| Mg15 | -4.309215 | -0.214066 | 2.502543  |

|      |          |           |           |
|------|----------|-----------|-----------|
| Mg16 | 2.985137 | -2.402259 | -0.900651 |
| Mg17 | 2.640860 | -2.523188 | 2.152646  |

@mg17-isomer15 bp86/6-31G(d) Etot=-3401.545950 Eb=-13.33

|      |           |           |           |
|------|-----------|-----------|-----------|
| Mg1  | 1.536324  | 1.028219  | 1.634560  |
| Mg2  | 0.142585  | 2.007711  | -1.514484 |
| Mg3  | -1.112170 | 0.047761  | 0.457116  |
| Mg4  | 1.706234  | 3.821471  | 0.486227  |
| Mg5  | 0.462955  | -2.043071 | 1.876060  |
| Mg6  | 3.262359  | -1.345539 | 0.824183  |
| Mg7  | -2.864904 | -1.902305 | 1.876263  |
| Mg8  | 3.166725  | 1.338297  | -0.922332 |
| Mg9  | 6.009436  | 0.000952  | -0.192055 |
| Mg10 | -1.206363 | 2.889382  | 1.244749  |
| Mg11 | -3.813197 | 1.074255  | 1.509048  |
| Mg12 | -4.027489 | -0.956037 | -0.864359 |
| Mg13 | 1.622745  | -3.824929 | -0.337904 |
| Mg14 | 1.216916  | -0.964053 | -1.418409 |
| Mg15 | -1.379961 | -2.783555 | -0.753724 |
| Mg16 | -1.667577 | -0.359448 | -2.626210 |
| Mg17 | -3.054619 | 1.970890  | -1.278730 |

@mg17-isomer16 bp86/6-31G(d) Etot=-3401.541588 Eb=-13.17

|      |           |           |           |
|------|-----------|-----------|-----------|
| Mg1  | -0.180849 | -0.941287 | -2.482609 |
| Mg2  | 2.717706  | -1.425706 | -1.374505 |
| Mg3  | 3.613103  | 1.067839  | 0.261068  |
| Mg4  | -0.701243 | 1.152110  | -0.413543 |
| Mg5  | 3.098899  | -1.753910 | 1.573317  |
| Mg6  | 1.503829  | 3.300959  | 0.334306  |
| Mg7  | -2.371354 | -2.762633 | -1.315828 |
| Mg8  | -4.273472 | -0.981047 | 0.404065  |
| Mg9  | -3.119493 | 0.206019  | -2.148486 |
| Mg10 | -1.396026 | 4.263622  | 0.602464  |
| Mg11 | 5.781243  | -1.192740 | 0.070556  |
| Mg12 | -3.558573 | 1.953715  | 0.349043  |
| Mg13 | 1.110405  | 0.664350  | 2.017817  |
| Mg14 | 0.168441  | -1.879899 | 0.468359  |
| Mg15 | -1.838584 | -0.081310 | 2.134573  |
| Mg16 | -2.392146 | -3.114831 | 1.715496  |
| Mg17 | 1.838115  | 1.524748  | -2.196092 |

@mg17-isomer17 bp86/6-31G(d) Etot=-3401.540947 Eb=-13.14

|      |           |           |           |
|------|-----------|-----------|-----------|
| Mg1  | -1.935261 | 2.662904  | -1.008200 |
| Mg2  | -0.661514 | -1.998518 | -2.290635 |
| Mg3  | -3.028389 | -3.168560 | -0.770538 |
| Mg4  | -3.933977 | -1.187834 | 1.550757  |
| Mg5  | 3.123122  | 1.215523  | 0.164177  |
| Mg6  | 1.174747  | 0.027334  | 2.288860  |
| Mg7  | 1.289884  | 2.719151  | -1.878606 |
| Mg8  | 5.214590  | -0.980938 | -0.495822 |
| Mg9  | 2.089090  | -1.825691 | 0.009812  |
| Mg10 | 2.244963  | -0.153580 | -2.546628 |
| Mg11 | -4.498485 | 1.633480  | 0.506841  |
| Mg12 | -1.016491 | -1.955211 | 1.167968  |
| Mg13 | -3.067013 | -0.225494 | -1.407828 |
| Mg14 | 4.120670  | -1.013808 | 2.293702  |
| Mg15 | 0.758258  | 2.892530  | 1.143046  |
| Mg16 | -1.825953 | 1.001252  | 1.858025  |
| Mg17 | -0.048239 | 0.357461  | -0.584932 |

@mg17-isomer18 bp86/6-31G(d) Etot=-3401.540629 Eb=-13.13

|     |           |           |          |
|-----|-----------|-----------|----------|
| Mg1 | -2.564977 | -1.275420 | 2.041585 |
| Mg2 | -4.081521 | 1.035909  | 0.643950 |
| Mg3 | -1.495056 | 1.781690  | 2.064016 |

|      |           |           |           |
|------|-----------|-----------|-----------|
| Mg4  | 0.941260  | -2.164539 | 1.964741  |
| Mg5  | -3.483368 | -1.514466 | -0.880363 |
| Mg6  | 1.548783  | 1.032306  | 1.862183  |
| Mg7  | -0.534813 | -0.256364 | 0.087875  |
| Mg8  | -1.278767 | -3.569676 | 0.250357  |
| Mg9  | -2.535293 | 3.597701  | -0.207883 |
| Mg10 | -2.402588 | 1.165072  | -2.009828 |
| Mg11 | 3.445795  | -0.927211 | 0.556555  |
| Mg12 | 0.305919  | 2.597940  | -0.751568 |
| Mg13 | 6.179388  | 0.728840  | 0.100162  |
| Mg14 | 1.543154  | -2.874566 | -0.947439 |
| Mg15 | -0.808250 | -1.481126 | -2.511233 |
| Mg16 | 1.843229  | 0.023086  | -1.910376 |
| Mg17 | 3.377104  | 2.100824  | -0.352736 |

@mg17-isomer19 bp86/6-31G(d) Etot=-3401.539847 Eb=-13.10

|      |           |           |           |
|------|-----------|-----------|-----------|
| Mg1  | -2.087151 | 0.102017  | -1.360425 |
| Mg2  | -3.255278 | -1.833218 | 1.254111  |
| Mg3  | -0.051436 | 2.071658  | 1.117800  |
| Mg4  | -4.944598 | 0.451531  | 0.117682  |
| Mg5  | -0.295609 | -0.904280 | 1.710591  |
| Mg6  | -0.982784 | -2.611872 | -0.813707 |
| Mg7  | -4.201139 | -2.136097 | -1.512546 |
| Mg8  | 1.994376  | -2.605816 | 0.225542  |
| Mg9  | 1.019837  | -0.197690 | -1.220183 |
| Mg10 | 3.954585  | -1.115219 | -1.744528 |
| Mg11 | 5.106348  | 1.210202  | 0.062264  |
| Mg12 | -2.913087 | 2.716303  | -0.190514 |
| Mg13 | -0.337347 | 2.408310  | -1.977650 |
| Mg14 | 4.737992  | -1.616797 | 1.060987  |
| Mg15 | 2.494403  | 2.441342  | -0.723686 |
| Mg16 | -2.694315 | 1.024411  | 2.260625  |
| Mg17 | 2.455203  | 0.595213  | 1.733638  |

@mg17-isomer20 bp86/6-31G(d) Etot=-3401.539602 Eb=-13.09

|      |           |           |           |
|------|-----------|-----------|-----------|
| Mg1  | 1.485574  | 1.215900  | -1.600271 |
| Mg2  | 1.946354  | -1.428114 | 1.500460  |
| Mg3  | 3.881837  | 0.418840  | 0.068308  |
| Mg4  | -0.672781 | 0.066190  | 0.358147  |
| Mg5  | 1.562132  | 1.783407  | 1.450586  |
| Mg6  | -1.486641 | 1.582591  | -2.344140 |
| Mg7  | 0.370384  | -3.617659 | -0.123718 |
| Mg8  | -1.606386 | 2.344620  | 2.183649  |
| Mg9  | 7.012427  | 0.684541  | 0.255560  |
| Mg10 | -0.539275 | -1.441411 | -2.207564 |
| Mg11 | -3.388858 | 2.474768  | -0.191690 |
| Mg12 | -3.514509 | -0.370926 | -1.365737 |
| Mg13 | 2.418333  | -1.779310 | -1.520150 |
| Mg14 | -3.403089 | -0.212946 | 1.648549  |
| Mg15 | -0.361976 | 3.564657  | -0.317440 |
| Mg16 | -2.763094 | -3.000432 | -0.026809 |
| Mg17 | -0.940432 | -2.284716 | 2.232258  |

@mg17-isomer21 bp86/6-31G(d) Etot=-3401.539266 Eb=-13.08

|      |           |           |           |
|------|-----------|-----------|-----------|
| Mg1  | -4.885036 | 0.693391  | 0.659154  |
| Mg2  | -2.757317 | 3.047916  | 0.183882  |
| Mg3  | 3.311372  | 1.744053  | 1.477159  |
| Mg4  | 0.978537  | -0.149710 | 2.403482  |
| Mg5  | 3.536387  | -1.389411 | 1.242008  |
| Mg6  | -1.481270 | -4.553237 | 0.132513  |
| Mg7  | -1.066368 | -2.275579 | -1.965247 |
| Mg8  | 0.416241  | 2.657944  | 0.991494  |
| Mg9  | -0.028890 | 0.037366  | -0.406212 |
| Mg10 | -2.857482 | 0.435455  | -1.641619 |

|      |           |           |           |
|------|-----------|-----------|-----------|
| Mg11 | 2.229072  | 1.856299  | -1.542363 |
| Mg12 | -1.945628 | 0.718820  | 1.948498  |
| Mg13 | -2.861244 | -1.819240 | 0.498867  |
| Mg14 | 2.304431  | -1.317026 | -1.792724 |
| Mg15 | -0.699010 | 2.746404  | -1.938674 |
| Mg16 | 4.840373  | 0.362483  | -0.838564 |
| Mg17 | 0.965831  | -2.795927 | 0.588346  |

@mg17-isomer22 bp86/6-31G(d) Etot=-3401.537401 Eb=-13.01

|      |           |           |           |
|------|-----------|-----------|-----------|
| Mg1  | -1.570035 | -1.899636 | 2.080496  |
| Mg2  | -0.071415 | 0.911834  | 2.245930  |
| Mg3  | 1.607312  | -1.668371 | 1.592008  |
| Mg4  | 2.901987  | 1.076354  | 1.177076  |
| Mg5  | 1.239490  | 3.704607  | 1.632128  |
| Mg6  | 4.591953  | -1.437080 | 0.428451  |
| Mg7  | -3.084324 | 0.661814  | 1.298546  |
| Mg8  | -0.514893 | -3.561525 | -0.310845 |
| Mg9  | -0.160730 | -0.500052 | -0.536472 |
| Mg10 | -3.258067 | -1.950404 | -0.374325 |
| Mg11 | -1.011460 | 2.573612  | -0.129542 |
| Mg12 | 2.428270  | -3.084719 | -1.145555 |
| Mg13 | 2.241424  | 2.861029  | -1.156259 |
| Mg14 | 2.864057  | -0.076195 | -1.796128 |
| Mg15 | -2.751568 | 0.713527  | -1.820577 |
| Mg16 | -5.715346 | 0.361016  | -0.370791 |
| Mg17 | 0.263346  | 1.314191  | -2.814142 |

@mg17-isomer23 bp86/6-31G(d) Etot=-3401.537228 Eb=-13.01

|      |           |           |           |
|------|-----------|-----------|-----------|
| Mg1  | 0.011564  | 0.067144  | -2.193513 |
| Mg2  | 3.023812  | -0.258666 | -1.463597 |
| Mg3  | 1.890750  | 2.587540  | -1.583768 |
| Mg4  | 2.558634  | -0.814295 | 1.549591  |
| Mg5  | 1.112434  | 2.152614  | 1.584886  |
| Mg6  | 5.697266  | -0.778836 | 0.447947  |
| Mg7  | -0.445639 | -0.361081 | 0.935281  |
| Mg8  | -4.063260 | 2.653986  | 0.039433  |
| Mg9  | -2.126076 | -2.082758 | -1.232246 |
| Mg10 | -3.082463 | 0.699727  | -2.072090 |
| Mg11 | 3.929107  | 1.826709  | 0.591879  |
| Mg12 | -0.982612 | 2.508627  | -0.624195 |
| Mg13 | -2.271161 | -2.721831 | 1.765418  |
| Mg14 | -1.957464 | 1.980873  | 2.205690  |
| Mg15 | 1.231153  | -2.530472 | -0.668991 |
| Mg16 | -3.742622 | -0.204078 | 0.841404  |
| Mg17 | -0.783421 | -4.725204 | -0.123129 |

@mg17-isomer24 bp86/6-31G(d) Etot=-3401.534829 Eb=-12.92

|      |           |           |           |
|------|-----------|-----------|-----------|
| Mg1  | 2.283001  | 1.032485  | 1.478578  |
| Mg2  | -0.390623 | -0.626573 | -0.971935 |
| Mg3  | -2.645405 | -1.410890 | 1.314483  |
| Mg4  | 0.442020  | 2.325237  | -0.978699 |
| Mg5  | -0.740288 | 1.019518  | 1.720341  |
| Mg6  | 5.548172  | 0.695898  | 0.168936  |
| Mg7  | 0.700559  | -1.786772 | 1.767023  |
| Mg8  | 3.633887  | -1.693930 | 0.873375  |
| Mg9  | -2.416540 | 3.058042  | 0.013903  |
| Mg10 | -4.427581 | 0.480245  | -0.393491 |
| Mg11 | -2.186264 | 1.288203  | -2.403178 |
| Mg12 | 3.534847  | 2.823555  | -0.544321 |
| Mg13 | 1.719782  | -2.963012 | -1.102244 |
| Mg14 | -0.992389 | -3.770868 | -0.036295 |
| Mg15 | -3.628968 | 1.302013  | 2.339413  |
| Mg16 | 2.617420  | -0.007370 | -1.502049 |
| Mg17 | -3.051629 | -1.765781 | -1.743839 |

@mg17-isomer25 bp86/6-31G(d) Etot=-3401.532875 Eb=-12.85

|      |           |           |           |
|------|-----------|-----------|-----------|
| Mg1  | 2.284279  | 2.044007  | 1.752849  |
| Mg2  | 0.439539  | -0.059256 | 2.895363  |
| Mg3  | -2.278932 | -0.035567 | -1.989004 |
| Mg4  | -2.841907 | -0.675823 | 3.131663  |
| Mg5  | 5.671730  | -1.285170 | -0.136019 |
| Mg6  | -1.811943 | 1.391758  | 1.111195  |
| Mg7  | 3.796732  | 0.864351  | -1.261422 |
| Mg8  | 1.938977  | 3.253549  | -0.966367 |
| Mg9  | 3.029281  | -1.002892 | 1.682766  |
| Mg10 | -1.260950 | -1.793461 | 0.841951  |
| Mg11 | -1.021983 | 2.656965  | -1.575415 |
| Mg12 | -0.109626 | -2.229249 | -2.023608 |
| Mg13 | 0.805585  | 0.310491  | -0.419718 |
| Mg14 | -4.130100 | 2.089333  | -0.946685 |
| Mg15 | -3.102258 | -2.841688 | -1.380602 |
| Mg16 | -4.255798 | -0.568586 | 0.442443  |
| Mg17 | 2.847375  | -2.118762 | -1.159390 |

@mg17-isomer26 bp86/6-31G(d) Etot=-3401.532148 Eb=-12.82

|      |           |           |           |
|------|-----------|-----------|-----------|
| Mg1  | 0.981566  | -1.502319 | -0.669773 |
| Mg2  | -1.743400 | -3.136267 | -0.335164 |
| Mg3  | 3.534305  | -0.667387 | -2.045056 |
| Mg4  | 0.388112  | 1.676999  | 1.614202  |
| Mg5  | -4.215032 | -1.834783 | -1.711798 |
| Mg6  | -0.683384 | -1.164722 | 1.823360  |
| Mg7  | 5.347260  | -0.346393 | 0.446686  |
| Mg8  | 3.763375  | -2.816270 | 0.180422  |
| Mg9  | 2.900868  | 1.650081  | 0.011857  |
| Mg10 | -1.811139 | 2.845377  | -0.488534 |
| Mg11 | -3.869389 | -1.528586 | 1.223497  |
| Mg12 | 0.943177  | 3.978275  | -0.429826 |
| Mg13 | 2.399488  | -0.508886 | 2.042831  |
| Mg14 | 0.844368  | 1.272655  | -2.046803 |
| Mg15 | -1.630701 | -0.146287 | -1.117842 |
| Mg16 | -2.650874 | 1.227982  | 1.958267  |
| Mg17 | -4.498598 | 1.000533  | -0.456329 |

@mg17-isomer27 bp86/6-31G(d) Etot=-3401.531506 Eb=-12.80

|      |           |           |           |
|------|-----------|-----------|-----------|
| Mg1  | -0.119318 | 1.081147  | 0.043726  |
| Mg2  | -2.377984 | 3.226800  | 0.936504  |
| Mg3  | 2.776763  | 1.903351  | 0.250068  |
| Mg4  | -1.977126 | 0.534779  | 2.412187  |
| Mg5  | 4.003391  | -0.779503 | 1.277391  |
| Mg6  | -0.718075 | -0.475277 | -2.370803 |
| Mg7  | -0.949855 | -1.843567 | 0.896650  |
| Mg8  | -4.196259 | -1.686407 | 1.202300  |
| Mg9  | -3.201958 | 0.459642  | -0.685404 |
| Mg10 | 0.303790  | -3.286030 | -1.524511 |
| Mg11 | -1.607910 | 2.751789  | -2.036524 |
| Mg12 | 1.916347  | -3.021232 | 1.123295  |
| Mg13 | 1.201039  | -0.173354 | 2.378386  |
| Mg14 | 2.128852  | -0.820648 | -1.145966 |
| Mg15 | 0.492904  | 4.136847  | -0.122817 |
| Mg16 | 5.231365  | 0.527260  | -1.202264 |
| Mg17 | -2.905967 | -2.535597 | -1.432216 |

@mg17-isomer28 bp86/6-31G(d) Etot=-3401.529931 Eb=-12.74

|     |           |           |           |
|-----|-----------|-----------|-----------|
| Mg1 | -2.057334 | -0.955716 | 1.583746  |
| Mg2 | -3.048853 | 1.912094  | -1.474679 |
| Mg3 | -0.109668 | 1.394734  | -2.272237 |
| Mg4 | 0.381458  | -0.473425 | -0.003976 |
| Mg5 | -0.760665 | -3.330127 | -0.003340 |

|      |           |           |           |
|------|-----------|-----------|-----------|
| Mg6  | -3.049026 | 1.913175  | 1.477583  |
| Mg7  | 2.326389  | -2.940413 | -0.004861 |
| Mg8  | -0.825359 | 3.505339  | 0.000452  |
| Mg9  | 2.891306  | -0.150167 | -1.685085 |
| Mg10 | 5.181421  | -1.578618 | 0.003085  |
| Mg11 | -0.109079 | 1.389008  | 2.269884  |
| Mg12 | 5.076405  | 1.418776  | 0.006275  |
| Mg13 | -2.059733 | -0.955629 | -1.585981 |
| Mg14 | -3.839951 | -3.120813 | 0.004099  |
| Mg15 | 2.884402  | -0.153872 | 1.686055  |
| Mg16 | 1.926314  | 2.302489  | -0.002734 |
| Mg17 | -4.808027 | -0.176835 | 0.001712  |

@mg17-isomer29 bp86/6-31G(d) Etot=-3401.528626 Eb=-12.69

|      |           |           |           |
|------|-----------|-----------|-----------|
| Mg1  | -0.392039 | 3.011658  | 0.571043  |
| Mg2  | -1.872908 | 0.349155  | 0.957110  |
| Mg3  | 2.151156  | 2.916138  | -1.142625 |
| Mg4  | 0.799354  | -1.125410 | 1.582229  |
| Mg5  | 4.859970  | 1.186697  | -0.290248 |
| Mg6  | -0.584915 | 1.428459  | -1.919960 |
| Mg7  | -0.625995 | -1.543939 | -1.117682 |
| Mg8  | 2.198529  | -3.139421 | -0.188565 |
| Mg9  | -3.266318 | -2.411672 | 0.291187  |
| Mg10 | -0.087842 | 1.329219  | 3.185488  |
| Mg11 | -3.573333 | -0.340222 | -2.027912 |
| Mg12 | -0.590552 | -4.069076 | 0.703432  |
| Mg13 | -3.322595 | 2.533526  | -0.687827 |
| Mg14 | -5.073872 | 0.119987  | 0.429630  |
| Mg15 | 2.455503  | 1.615926  | 1.572182  |
| Mg16 | 2.017504  | -0.096530 | -1.057745 |
| Mg17 | 4.908353  | -1.764494 | -0.859738 |

@mg17-isomer30 bp86/6-31G(d) Etot=-3401.525161 Eb=-12.56

|      |           |           |           |
|------|-----------|-----------|-----------|
| Mg1  | -2.169444 | -0.799877 | -0.875937 |
| Mg2  | -4.914812 | -1.074882 | 0.515520  |
| Mg3  | 0.725594  | -0.439747 | -1.459617 |
| Mg4  | 0.906267  | 2.479734  | -0.639098 |
| Mg5  | 2.541904  | 0.521406  | 1.050862  |
| Mg6  | -0.276042 | -0.772616 | 1.431017  |
| Mg7  | 2.448049  | -2.556380 | 0.222077  |
| Mg8  | -0.405988 | -3.285815 | -0.317849 |
| Mg9  | -3.396305 | -3.677479 | 0.047154  |
| Mg10 | -4.101991 | 1.621990  | -0.790779 |
| Mg11 | -2.793711 | 0.910761  | 1.765321  |
| Mg12 | -1.842240 | 3.439683  | 0.117060  |
| Mg13 | 5.339128  | -1.377520 | 0.767733  |
| Mg14 | -0.005101 | 2.104632  | 2.206345  |
| Mg15 | -1.363195 | 1.679284  | -2.461307 |
| Mg16 | 3.945959  | -0.395737 | -1.700200 |
| Mg17 | 5.361928  | 1.622562  | 0.121698  |

@mg17-isomer31 bp86/6-31G(d) Etot=-3401.520313 Eb=-12.38

|      |           |           |           |
|------|-----------|-----------|-----------|
| Mg1  | 0.667805  | -2.337457 | -0.564345 |
| Mg2  | -1.922056 | -2.252261 | 1.062118  |
| Mg3  | 0.633802  | -0.751836 | 2.220577  |
| Mg4  | 0.610601  | -0.108187 | -2.683066 |
| Mg5  | -2.111795 | -1.746265 | -1.956483 |
| Mg6  | 0.917986  | 2.971673  | -1.677365 |
| Mg7  | -3.163702 | 2.785123  | 0.765561  |
| Mg8  | -1.323146 | 4.693359  | -0.672407 |
| Mg9  | -2.265932 | 0.502669  | 2.611205  |
| Mg10 | -0.981694 | 0.724224  | -0.200933 |
| Mg11 | 3.290880  | -1.897950 | 1.022435  |
| Mg12 | -4.581044 | -2.902856 | -0.396432 |



|      |           |           |           |
|------|-----------|-----------|-----------|
| Mg13 | 5.277170  | 0.319884  | 0.046489  |
| Mg14 | -4.091884 | -0.024862 | 0.042977  |
| Mg15 | 3.553101  | 0.697170  | 2.636864  |
| Mg16 | 3.325409  | -1.407091 | -2.088385 |
| Mg17 | 2.164498  | 0.734663  | -0.168810 |

@mg17-isomer32 bp86/6-31G(d) Etot=-3401.519025 Eb=-12.34

|      |           |           |           |
|------|-----------|-----------|-----------|
| Mg1  | -0.279693 | 1.487616  | -1.847208 |
| Mg2  | 0.703798  | -1.362850 | -1.630441 |
| Mg3  | 1.744379  | -1.723870 | 1.148827  |
| Mg4  | 4.780197  | -0.216952 | 1.720413  |
| Mg5  | 5.462897  | 1.687517  | -0.539799 |
| Mg6  | -2.282870 | -0.774773 | -2.234021 |
| Mg7  | -2.623130 | 1.243035  | 0.077253  |
| Mg8  | -1.357541 | -2.009423 | 0.497481  |
| Mg9  | 2.228546  | 1.238341  | 0.088247  |
| Mg10 | 6.900716  | -0.915858 | -0.307800 |
| Mg11 | -0.276972 | 0.391320  | 1.974196  |
| Mg12 | -5.173154 | 0.588325  | -1.860118 |
| Mg13 | -0.131744 | 3.064599  | 0.653978  |
| Mg14 | -4.632973 | -1.802434 | -0.126924 |
| Mg15 | -3.167065 | -0.497011 | 2.470695  |
| Mg16 | -5.811920 | 0.646230  | 1.065295  |
| Mg17 | 3.916530  | -1.043812 | -1.150074 |

@mg17-isomer33 bp86/6-31G(d) Etot=-3401.505416 Eb=-11.83

|      |           |           |           |
|------|-----------|-----------|-----------|
| Mg1  | 0.748049  | 0.609784  | -1.388731 |
| Mg2  | 2.157150  | -1.586397 | -3.069867 |
| Mg3  | -1.444365 | 2.794862  | -1.985038 |
| Mg4  | 2.514634  | -2.183735 | -0.204995 |
| Mg5  | 3.859336  | 0.545370  | -1.620580 |
| Mg6  | -3.541607 | 2.437198  | 0.294483  |
| Mg7  | -0.588075 | 1.975341  | 0.954610  |
| Mg8  | 5.133047  | 2.350693  | 0.531004  |
| Mg9  | 2.350089  | 1.039792  | 1.212795  |
| Mg10 | -2.901186 | 0.039657  | 2.228092  |
| Mg11 | 0.005094  | -1.030489 | 1.405442  |
| Mg12 | -2.343993 | -0.296045 | -0.777498 |
| Mg13 | -5.317208 | 0.036139  | 0.328233  |
| Mg14 | 5.040747  | -0.690811 | 0.934792  |
| Mg15 | 2.693443  | -1.902139 | 2.728130  |
| Mg16 | -7.985839 | -1.620539 | -0.173013 |
| Mg17 | -0.379314 | -2.518681 | -1.397859 |

@mg17-isomer34 bp86/6-31G(d) Etot=-3401.497030 Eb=-11.52

|      |           |           |           |
|------|-----------|-----------|-----------|
| Mg1  | -1.419566 | 2.830875  | -0.260131 |
| Mg2  | -0.009284 | 0.976528  | -2.269043 |
| Mg3  | -2.835037 | -1.414868 | 1.238700  |
| Mg4  | -4.025039 | 1.472247  | 0.775691  |
| Mg5  | -2.731427 | -0.002014 | -1.551706 |
| Mg6  | -0.093507 | -1.345661 | 2.397169  |
| Mg7  | -1.549350 | 1.416314  | 2.503562  |
| Mg8  | 0.919376  | 1.047069  | 0.844779  |
| Mg9  | -5.398955 | -1.011305 | -0.286465 |
| Mg10 | -0.169741 | -1.576883 | -0.646037 |
| Mg11 | -8.149633 | -2.228257 | -1.293734 |
| Mg12 | 2.875337  | -1.408525 | 1.292164  |
| Mg13 | 4.058914  | 1.568797  | 0.784697  |
| Mg14 | 2.854023  | -0.089338 | -1.479546 |
| Mg15 | 5.573260  | -0.841743 | -0.002775 |
| Mg16 | 2.018299  | 3.153002  | -1.157106 |
| Mg17 | 8.082331  | -2.546237 | -0.890218 |

@mg17-isomer35 bp86/6-31G(d) Etot=-3401.491364 Eb=-11.31

|      |            |           |           |
|------|------------|-----------|-----------|
| Mg1  | 3.011726   | 1.119350  | 0.006721  |
| Mg2  | 3.070829   | -1.850686 | 1.596556  |
| Mg3  | 4.516752   | 0.512662  | 2.666182  |
| Mg4  | 1.314927   | -3.712996 | -0.014886 |
| Mg5  | 0.223832   | 2.270545  | 0.006269  |
| Mg6  | -1.825765  | 0.800665  | 1.697809  |
| Mg7  | 1.201266   | 0.673750  | 2.628876  |
| Mg8  | 1.201293   | 0.691743  | -2.627294 |
| Mg9  | 3.072199   | -1.838456 | -1.610143 |
| Mg10 | -2.715533  | 3.313867  | 0.011546  |
| Mg11 | -1.823667  | 0.813668  | -1.697126 |
| Mg12 | -4.513286  | 0.978972  | -0.001091 |
| Mg13 | -7.131900  | -0.673764 | 0.000298  |
| Mg14 | -10.104541 | -2.140792 | -0.002850 |
| Mg15 | 4.514705   | 0.537750  | -2.656229 |
| Mg16 | 5.551607   | -0.678603 | -0.000739 |
| Mg17 | 0.435555   | -0.817676 | -0.003900 |

@mg18-isomer01 bp86/6-31G(d) Etot=-3601.685070 Eb=-15.01

|      |           |           |           |
|------|-----------|-----------|-----------|
| Mg1  | -2.206106 | 2.669656  | 1.467582  |
| Mg2  | 2.827436  | 1.661637  | 0.000107  |
| Mg3  | 3.379945  | 0.000126  | -2.419497 |
| Mg4  | -2.206139 | -2.669634 | -1.467672 |
| Mg5  | 0.347571  | -3.568204 | -0.000219 |
| Mg6  | 0.782617  | -1.649730 | -2.370990 |
| Mg7  | -2.206136 | -2.669821 | 1.467343  |
| Mg8  | -3.402129 | 0.000053  | -0.000045 |
| Mg9  | -0.246741 | -0.000110 | 0.000025  |
| Mg10 | -1.883419 | 0.000192  | -2.699147 |
| Mg11 | -1.883463 | -0.000156 | 2.699180  |
| Mg12 | 0.347665  | 3.568249  | 0.000206  |
| Mg13 | 0.782598  | 1.649951  | -2.370740 |
| Mg14 | 3.379853  | -0.000140 | 2.419544  |
| Mg15 | 2.827386  | -1.661635 | -0.000054 |
| Mg16 | -2.206023 | 2.669946  | -1.467405 |
| Mg17 | 0.782518  | 1.649681  | 2.370936  |
| Mg18 | 0.782567  | -1.650060 | 2.370844  |

@mg18-isomer02 bp86/6-31G(d) Etot=-3601.683618 Eb=-14.96

|      |           |           |           |
|------|-----------|-----------|-----------|
| Mg1  | -0.084801 | 0.000145  | 0.000004  |
| Mg2  | 0.891372  | -1.621122 | -2.377562 |
| Mg3  | 2.764008  | -2.328890 | -0.000009 |
| Mg4  | 0.891363  | -1.621158 | 2.377554  |
| Mg5  | -2.264492 | -2.595418 | 1.520395  |
| Mg6  | -2.264489 | -2.595395 | -1.520417 |
| Mg7  | 0.105078  | -3.607444 | -0.000019 |
| Mg8  | 2.763979  | 2.328795  | 0.000014  |
| Mg9  | -1.817961 | 0.000006  | -2.762381 |
| Mg10 | 3.379513  | 0.000018  | -1.662830 |
| Mg11 | 3.379497  | 0.000000  | 1.662827  |
| Mg12 | -1.817957 | -0.000020 | 2.762377  |
| Mg13 | -3.284103 | -0.000001 | 0.000004  |
| Mg14 | 0.105087  | 3.607369  | 0.000014  |
| Mg15 | 0.891440  | 1.621133  | 2.377684  |
| Mg16 | -2.264486 | 2.595402  | 1.520419  |
| Mg17 | -2.264488 | 2.595423  | -1.520410 |
| Mg18 | 0.891440  | 1.621155  | -2.377663 |

@mg18-isomer03 bp86/6-31G(d) Etot=-3601.682770 Eb=-14.93

|     |           |           |          |
|-----|-----------|-----------|----------|
| Mg1 | -0.061733 | -0.147694 | 0.252560 |
| Mg2 | 1.748575  | -0.089355 | 2.801583 |
| Mg3 | -2.308774 | 1.537384  | 1.837266 |
| Mg4 | 0.901163  | -2.888163 | 1.768461 |
| Mg5 | 3.410050  | 1.654959  | 1.047919 |

|      |           |           |           |
|------|-----------|-----------|-----------|
| Mg6  | 1.337752  | 2.395794  | -1.216322 |
| Mg7  | -1.493609 | 1.053348  | -2.246627 |
| Mg8  | -3.890949 | 2.077687  | -0.747670 |
| Mg9  | 0.691666  | 2.617998  | 1.884641  |
| Mg10 | -1.531180 | -1.981381 | -2.349358 |
| Mg11 | -1.688760 | -3.490771 | 0.299221  |
| Mg12 | -1.290661 | 3.537299  | -0.265962 |
| Mg13 | -1.655885 | -1.351590 | 2.539004  |
| Mg14 | 2.942263  | -1.225915 | 0.097320  |
| Mg15 | 3.853203  | 0.907216  | -1.893577 |
| Mg16 | -3.160067 | -0.801215 | -0.096926 |
| Mg17 | 1.257330  | -0.468474 | -2.484766 |
| Mg18 | 0.939616  | -3.337127 | -1.226765 |

@mg18-isomer04 bp86/6-31G(d) Etot=-3601.682467 Eb=-14.92

|      |           |           |           |
|------|-----------|-----------|-----------|
| Mg1  | -0.171562 | -0.000448 | 0.127225  |
| Mg2  | -2.771196 | 2.707199  | -0.658160 |
| Mg3  | 2.284535  | -2.149802 | -0.381360 |
| Mg4  | 1.256236  | 1.531888  | 2.558183  |
| Mg5  | 1.307274  | -0.000640 | -2.559451 |
| Mg6  | -1.898003 | 1.548497  | 2.235357  |
| Mg7  | -0.257704 | -2.572401 | -2.156998 |
| Mg8  | -3.520099 | 0.005663  | 0.246402  |
| Mg9  | -0.219365 | -3.626637 | 0.750398  |
| Mg10 | -0.206480 | 3.627399  | 0.752843  |
| Mg11 | 4.084328  | -0.006623 | -1.566391 |
| Mg12 | -0.248394 | 2.576113  | -2.155639 |
| Mg13 | 3.530928  | -0.006938 | 1.462875  |
| Mg14 | -2.024428 | 0.004258  | -2.406441 |
| Mg15 | 1.248445  | -1.535722 | 2.557992  |
| Mg16 | -2.780840 | -2.697451 | -0.660585 |
| Mg17 | -1.905554 | -1.546260 | 2.234267  |
| Mg18 | 2.291879  | 2.141904  | -0.380517 |

@mg18-isomer05 bp86/6-31G(d) Etot=-3601.680814 Eb=-14.86

|      |           |           |           |
|------|-----------|-----------|-----------|
| Mg1  | -0.068913 | 0.086627  | 0.064009  |
| Mg2  | -2.997972 | -0.753533 | 0.922476  |
| Mg3  | 3.972272  | 0.169157  | -1.670069 |
| Mg4  | 3.395517  | 1.237597  | 1.070502  |
| Mg5  | 0.383243  | -3.457881 | -1.182928 |
| Mg6  | -2.301999 | -3.572952 | 0.088963  |
| Mg7  | 1.731475  | 2.281234  | -1.260227 |
| Mg8  | 0.037172  | -2.680376 | 1.809789  |
| Mg9  | 0.677399  | 2.619224  | 1.735855  |
| Mg10 | 2.631119  | -1.808908 | 0.221288  |
| Mg11 | -2.483103 | 2.271144  | 1.566532  |
| Mg12 | 1.315581  | -0.887193 | -2.492510 |
| Mg13 | -2.027119 | -1.375937 | -2.031689 |
| Mg14 | -1.014566 | 0.131672  | 2.985685  |
| Mg15 | -3.298894 | 1.418395  | -1.211019 |
| Mg16 | -1.098741 | 3.530317  | -0.714760 |
| Mg17 | 1.986709  | -0.537485 | 2.889522  |
| Mg18 | -0.839180 | 1.328898  | -2.791418 |

@mg18-isomer06 bp86/6-31G(d) Etot=-3601.679725 Eb=-14.82

|     |           |           |           |
|-----|-----------|-----------|-----------|
| Mg1 | -3.035310 | 0.854072  | -1.940953 |
| Mg2 | 3.459386  | -0.832042 | 0.474111  |
| Mg3 | 1.495355  | -2.869841 | 1.298624  |
| Mg4 | 3.045379  | 0.815281  | -1.943527 |
| Mg5 | 1.503540  | 3.115222  | -1.000878 |
| Mg6 | -0.028360 | -4.203756 | -0.968792 |
| Mg7 | -1.681660 | -1.803879 | -1.865976 |
| Mg8 | -1.468193 | 3.139739  | -1.001547 |
| Mg9 | -3.467429 | -0.788091 | 0.476160  |

|      |           |           |           |
|------|-----------|-----------|-----------|
| Mg10 | 0.016880  | 2.544286  | 1.742718  |
| Mg11 | 0.003337  | 0.783934  | -2.696708 |
| Mg12 | 0.001561  | -0.044583 | 0.143356  |
| Mg13 | -1.622511 | -0.055838 | 2.730733  |
| Mg14 | -1.536016 | -2.855851 | 1.299564  |
| Mg15 | 1.657707  | -1.825449 | -1.867825 |
| Mg16 | 1.626778  | -0.071295 | 2.730513  |
| Mg17 | 3.111712  | 2.029443  | 1.193693  |
| Mg18 | -3.082157 | 2.068649  | 1.196736  |

@mg18-isomer07 bp86/6-31G(d) Etot=-3601.679706 Eb=-14.82

|      |           |           |           |
|------|-----------|-----------|-----------|
| Mg1  | 0.000001  | -0.089703 | 0.000002  |
| Mg2  | 1.975168  | -2.136328 | -1.605725 |
| Mg3  | -0.000002 | -0.502832 | 3.327620  |
| Mg4  | 0.000002  | 2.615215  | -1.662846 |
| Mg5  | 2.468951  | 0.852447  | -2.452349 |
| Mg6  | 1.975147  | -2.135913 | 1.606270  |
| Mg7  | 0.000001  | 2.615628  | 1.662190  |
| Mg8  | 0.000000  | -0.503705 | -3.327490 |
| Mg9  | -0.000003 | -3.756929 | 0.000470  |
| Mg10 | -2.468962 | 0.853074  | 2.452137  |
| Mg11 | -1.975170 | -2.136326 | -1.605726 |
| Mg12 | -1.975153 | -2.135910 | 1.606269  |
| Mg13 | -2.568451 | 2.612704  | -0.000333 |
| Mg14 | 2.568457  | 2.612699  | -0.000332 |
| Mg15 | 3.688449  | -0.234823 | 0.000030  |
| Mg16 | 2.468962  | 0.853071  | 2.452138  |
| Mg17 | -3.688449 | -0.234819 | 0.000029  |
| Mg18 | -2.468946 | 0.852450  | -2.452352 |

@mg18-isomer08 bp86/6-31G(d) Etot=-3601.676804 Eb=-14.72

|      |           |           |           |
|------|-----------|-----------|-----------|
| Mg1  | 3.525720  | -0.000911 | 1.586668  |
| Mg2  | 0.080073  | -3.690993 | 0.450918  |
| Mg3  | -1.857849 | 1.575576  | 1.514995  |
| Mg4  | 0.945363  | 2.222672  | -2.204369 |
| Mg5  | -3.365739 | 0.001789  | -0.772981 |
| Mg6  | -1.856322 | -1.570565 | 1.513145  |
| Mg7  | 0.084541  | 3.688238  | 0.453631  |
| Mg8  | -4.398985 | 0.000060  | 2.138998  |
| Mg9  | 2.881939  | -0.001371 | -1.605341 |
| Mg10 | 0.236077  | 0.001380  | -0.090451 |
| Mg11 | 2.885720  | -2.572478 | 0.105852  |
| Mg12 | 2.888238  | 2.569225  | 0.105766  |
| Mg13 | -2.028001 | -2.608063 | -1.518267 |
| Mg14 | 1.107181  | -1.538929 | 2.469331  |
| Mg15 | -1.153820 | 0.000763  | -2.896777 |
| Mg16 | 1.106189  | 1.534701  | 2.470740  |
| Mg17 | 0.941614  | -2.222154 | -2.203557 |
| Mg18 | -2.021939 | 2.611060  | -1.518301 |

@mg18-isomer09 bp86/6-31G(d) Etot=-3601.673078 Eb=-14.59

|      |           |           |           |
|------|-----------|-----------|-----------|
| Mg1  | 2.083502  | -0.036539 | -2.784785 |
| Mg2  | -2.224068 | 2.167505  | -1.471204 |
| Mg3  | 0.906119  | 2.646300  | -1.749528 |
| Mg4  | -1.902891 | -0.614015 | -2.643516 |
| Mg5  | -2.316533 | -3.080110 | -0.933799 |
| Mg6  | -3.263053 | -0.282068 | 0.169565  |
| Mg7  | 0.001821  | 0.011082  | -0.326923 |
| Mg8  | 0.794870  | 2.390460  | 1.589076  |
| Mg9  | 0.185504  | -2.857899 | 1.001249  |
| Mg10 | 1.835789  | -0.462219 | 2.182962  |
| Mg11 | 3.132028  | 1.246484  | -0.213912 |
| Mg12 | -2.445602 | 2.410901  | 1.619713  |
| Mg13 | -0.851409 | 4.394625  | 0.023972  |

|      |           |           |           |
|------|-----------|-----------|-----------|
| Mg14 | 2.891779  | -1.871910 | -0.458483 |
| Mg15 | -2.780844 | -2.703585 | 2.005662  |
| Mg16 | 0.472657  | -2.595801 | -2.150615 |
| Mg17 | 4.697544  | -0.561296 | 1.628250  |
| Mg18 | -1.217214 | -0.201915 | 2.512317  |

@mg18-isomer10 bp86/6-31G(d) Etot=-3601.659401 Eb=-14.11

|      |           |           |           |
|------|-----------|-----------|-----------|
| Mg1  | 0.159366  | -1.509601 | -2.348509 |
| Mg2  | 0.932698  | 1.603253  | -2.674388 |
| Mg3  | 0.934047  | 1.603491  | 2.674269  |
| Mg4  | -0.681364 | 3.778145  | -1.447936 |
| Mg5  | 2.984997  | -0.156597 | 1.520791  |
| Mg6  | 2.985672  | -0.152284 | -1.519019 |
| Mg7  | -2.173386 | 1.089226  | 2.220761  |
| Mg8  | 0.156677  | -1.507884 | 2.350537  |
| Mg9  | 4.525663  | -2.247311 | -0.002930 |
| Mg10 | 2.120937  | 2.611444  | 0.000131  |
| Mg11 | 1.624113  | -2.851702 | 0.002371  |
| Mg12 | -3.503713 | -0.594899 | -0.000803 |
| Mg13 | -0.677732 | 3.779297  | 1.447191  |
| Mg14 | -1.451628 | -2.974180 | 0.000770  |
| Mg15 | -2.842552 | -1.962963 | 2.534710  |
| Mg16 | -0.079564 | 0.371074  | -0.000401 |
| Mg17 | -2.840458 | -1.965569 | -2.534444 |
| Mg18 | -2.173772 | 1.087061  | -2.223099 |

@mg18-isomer11 bp86/6-31G(d) Etot=-3601.658836 Eb=-14.09

|      |           |           |           |
|------|-----------|-----------|-----------|
| Mg1  | -4.086348 | -1.684687 | -0.654226 |
| Mg2  | -1.434700 | -2.927564 | -0.284230 |
| Mg3  | 0.999826  | 3.729566  | -0.439980 |
| Mg4  | 0.829938  | 1.297091  | -2.440184 |
| Mg5  | -2.903283 | -1.567001 | 2.108028  |
| Mg6  | 2.692384  | 1.234138  | -0.054666 |
| Mg7  | 2.087799  | -0.476018 | 2.427844  |
| Mg8  | -0.171444 | -2.538088 | 2.563498  |
| Mg9  | 3.034647  | -0.937726 | -2.218542 |
| Mg10 | 0.201227  | -2.026785 | -2.655267 |
| Mg11 | -2.021454 | -0.069612 | -2.154775 |
| Mg12 | 1.272516  | 2.463498  | 2.396919  |
| Mg13 | -1.645575 | 2.918317  | -1.522718 |
| Mg14 | -3.107701 | 1.087021  | 0.554655  |
| Mg15 | -1.342150 | 3.474203  | 1.422708  |
| Mg16 | 4.230807  | -1.483039 | 0.485683  |
| Mg17 | 1.543675  | -2.643402 | 0.022796  |
| Mg18 | -0.180165 | 0.150089  | 0.442456  |

@mg18-isomer12 bp86/6-31G(d) Etot=-3601.647065 Eb=-13.68

|      |           |           |           |
|------|-----------|-----------|-----------|
| Mg1  | -0.696011 | -0.077579 | 0.748433  |
| Mg2  | 1.923768  | 2.029528  | 0.092327  |
| Mg3  | -2.562902 | 2.086405  | 1.787632  |
| Mg4  | 3.968126  | -0.240578 | -0.389058 |
| Mg5  | 2.307212  | -2.718003 | 0.063852  |
| Mg6  | -0.520619 | 3.956007  | 0.393723  |
| Mg7  | 0.362499  | 1.936071  | 2.647919  |
| Mg8  | -3.847711 | -0.097337 | 0.152648  |
| Mg9  | -2.816668 | 2.610247  | -1.169434 |
| Mg10 | -1.756617 | -0.101548 | -2.159869 |
| Mg11 | -0.569637 | -2.887163 | -1.043986 |
| Mg12 | 1.214731  | -0.360083 | -1.725871 |
| Mg13 | -3.569069 | -2.571768 | -1.677418 |
| Mg14 | 0.007856  | 2.479107  | -2.196395 |
| Mg15 | 0.098193  | -2.743475 | 2.130493  |
| Mg16 | 2.219308  | -0.426047 | 2.113164  |
| Mg17 | 7.043657  | -0.049054 | -0.979754 |

|                                                          |           |           |           |
|----------------------------------------------------------|-----------|-----------|-----------|
| Mg18                                                     | -2.806118 | -2.824728 | 1.211594  |
| @mg18-isomer13 bp86/6-31G(d) Etot=-3601.646592 Eb=-13.67 |           |           |           |
| Mg1                                                      | -1.364573 | -0.719837 | -2.634905 |
| Mg2                                                      | -3.722288 | -1.893586 | -1.138725 |
| Mg3                                                      | -3.492458 | 1.272652  | -1.631154 |
| Mg4                                                      | -0.784044 | -2.948763 | -0.584266 |
| Mg5                                                      | -4.501294 | 0.256716  | 1.004186  |
| Mg6                                                      | -0.347549 | 2.020941  | -1.472175 |
| Mg7                                                      | 1.442823  | -0.548547 | -1.083783 |
| Mg8                                                      | 2.281513  | -3.179947 | 0.296326  |
| Mg9                                                      | -1.438101 | -0.089222 | 0.422484  |
| Mg10                                                     | -2.876000 | -2.336982 | 1.752906  |
| Mg11                                                     | 4.807444  | -1.864955 | -0.716832 |
| Mg12                                                     | 2.571345  | 2.357945  | -0.501953 |
| Mg13                                                     | -2.381159 | 2.659194  | 1.001068  |
| Mg14                                                     | 5.282670  | 1.052838  | -0.591696 |
| Mg15                                                     | 0.289798  | 4.297520  | 0.538793  |
| Mg16                                                     | 0.404681  | -1.680315 | 2.088589  |
| Mg17                                                     | 0.674010  | 1.603222  | 1.795147  |
| Mg18                                                     | 3.153184  | -0.258874 | 1.455989  |
| @mg18-isomer14 bp86/6-31G(d) Etot=-3601.641979 Eb=-13.51 |           |           |           |
| Mg1                                                      | -0.779311 | -3.182791 | -0.200398 |
| Mg2                                                      | 1.350695  | -1.681800 | 1.554335  |
| Mg3                                                      | 0.571785  | -0.586900 | -1.246452 |
| Mg4                                                      | -3.572179 | -2.886958 | 0.720849  |
| Mg5                                                      | 0.979330  | 1.434276  | 1.114194  |
| Mg6                                                      | 1.841982  | 2.094220  | -1.810477 |
| Mg7                                                      | 4.337840  | -1.579329 | 0.614554  |
| Mg8                                                      | 3.539455  | -0.544097 | -2.176955 |
| Mg9                                                      | 3.278912  | 0.324110  | 2.786129  |
| Mg10                                                     | -1.933046 | 2.747055  | 1.511015  |
| Mg11                                                     | 2.253385  | -3.080119 | -0.995984 |
| Mg12                                                     | -5.681220 | -0.864864 | 0.116180  |
| Mg13                                                     | -4.337285 | 1.703999  | -0.090130 |
| Mg14                                                     | -1.675147 | -0.369079 | 1.219973  |
| Mg15                                                     | -1.482670 | 1.836432  | -1.362219 |
| Mg16                                                     | 0.083473  | 4.243682  | -0.311276 |
| Mg17                                                     | 4.051674  | 1.432293  | 0.084696  |
| Mg18                                                     | -2.827675 | -1.040128 | -1.528033 |
| @mg18-isomer15 bp86/6-31G(d) Etot=-3601.639848 Eb=-13.43 |           |           |           |
| Mg1                                                      | -1.870680 | -0.912271 | 1.416347  |
| Mg2                                                      | -3.309169 | 2.135642  | -1.151759 |
| Mg3                                                      | -0.541388 | 1.668555  | -2.366038 |
| Mg4                                                      | 0.416279  | -0.574906 | -0.670957 |
| Mg5                                                      | -4.876878 | -0.012190 | 0.375093  |
| Mg6                                                      | -1.115783 | -3.368635 | -0.381644 |
| Mg7                                                      | 1.545535  | -1.512574 | 2.009862  |
| Mg8                                                      | 4.920447  | 1.224910  | -0.520619 |
| Mg9                                                      | 4.350172  | -1.536839 | 0.551067  |
| Mg10                                                     | 1.995492  | 2.157353  | -0.678995 |
| Mg11                                                     | 1.984359  | -3.114042 | -0.570164 |
| Mg12                                                     | -2.741056 | 2.050404  | 1.773885  |
| Mg13                                                     | -4.072909 | -2.885419 | 0.218315  |
| Mg14                                                     | 0.265934  | 1.338888  | 1.840494  |
| Mg15                                                     | -2.522914 | -0.831235 | -1.638867 |
| Mg16                                                     | 3.268944  | 1.113378  | 1.980688  |
| Mg17                                                     | 3.059393  | -0.617771 | -2.153417 |
| Mg18                                                     | -0.755780 | 3.676751  | -0.033293 |
| @mg18-isomer16 bp86/6-31G(d) Etot=-3601.639772 Eb=-13.43 |           |           |           |
| Mg1                                                      | -1.209532 | 4.047203  | 0.561234  |

|      |           |           |           |
|------|-----------|-----------|-----------|
| Mg2  | -0.157853 | -3.027128 | -1.121783 |
| Mg3  | 0.866694  | -0.035855 | -0.860705 |
| Mg4  | -0.692674 | -1.322214 | 1.489340  |
| Mg5  | 2.819441  | -2.073001 | -1.953142 |
| Mg6  | 3.625873  | 0.988111  | -1.899813 |
| Mg7  | -2.818852 | -3.356016 | 0.370513  |
| Mg8  | 1.238013  | 2.962111  | -1.078744 |
| Mg9  | 3.442658  | 1.895136  | 0.888664  |
| Mg10 | 4.550274  | -0.860731 | 0.339153  |
| Mg11 | -5.119474 | -1.396343 | 0.397724  |
| Mg12 | 2.399541  | -0.425123 | 2.595796  |
| Mg13 | 0.409777  | 1.698063  | 1.662584  |
| Mg14 | -1.694553 | 2.038609  | -1.580640 |
| Mg15 | -2.390168 | -0.871260 | -1.199734 |
| Mg16 | 2.143970  | -2.765035 | 0.847600  |
| Mg17 | -4.788568 | 1.337325  | -0.756546 |
| Mg18 | -2.624565 | 1.166148  | 1.298499  |

@mg18-isomer17 bp86/6-31G(d) Etot=-3601.638001 Eb=-13.37

|      |           |           |           |
|------|-----------|-----------|-----------|
| Mg1  | -1.075336 | -2.626418 | -1.484147 |
| Mg2  | 1.571824  | 1.704222  | 2.579487  |
| Mg3  | 0.254972  | 0.018883  | -2.419978 |
| Mg4  | 3.722688  | 0.338446  | 0.946479  |
| Mg5  | -0.432117 | -3.034343 | 1.523201  |
| Mg6  | -2.629628 | -4.603949 | 0.110838  |
| Mg7  | -2.892399 | -0.225258 | -2.023785 |
| Mg8  | -3.333981 | -1.752334 | 0.694181  |
| Mg9  | 1.794643  | -1.271014 | 2.630552  |
| Mg10 | 1.508277  | 2.154153  | -0.482658 |
| Mg11 | 3.361611  | 0.253882  | -2.087345 |
| Mg12 | -0.585581 | 0.010857  | 0.735397  |
| Mg13 | 1.810640  | -1.846752 | -0.415053 |
| Mg14 | -0.923027 | 3.048926  | 1.428382  |
| Mg15 | -1.474717 | 2.436306  | -1.525965 |
| Mg16 | -3.598341 | 1.260685  | 0.666296  |
| Mg17 | 6.323241  | -0.014520 | -0.869332 |
| Mg18 | -3.402769 | 4.148226  | -0.006547 |

@mg18-isomer18 bp86/6-31G(d) Etot=-3601.634101 Eb=-13.23

|      |           |           |           |
|------|-----------|-----------|-----------|
| Mg1  | 2.195888  | 3.124835  | 1.276219  |
| Mg2  | 1.794971  | -1.640339 | -2.463684 |
| Mg3  | 0.788219  | 4.166386  | -1.237216 |
| Mg4  | -0.642831 | -2.184331 | 1.539280  |
| Mg5  | 1.899027  | 1.228748  | -1.360852 |
| Mg6  | -5.578209 | -0.513200 | 1.029435  |
| Mg7  | 4.563898  | -1.079507 | -1.248100 |
| Mg8  | 0.537919  | 0.579495  | 1.444544  |
| Mg9  | -0.413233 | -3.484204 | -1.317192 |
| Mg10 | -2.508667 | 0.626725  | 1.156018  |
| Mg11 | 2.257183  | -2.723706 | 0.235662  |
| Mg12 | 3.510446  | 0.260885  | 1.176130  |
| Mg13 | 1.973547  | -1.699810 | 2.995534  |
| Mg14 | -1.657714 | 2.424782  | -1.577387 |
| Mg15 | -0.713059 | -0.450345 | -1.253637 |
| Mg16 | -3.897171 | 0.230226  | -1.575550 |
| Mg17 | -3.176741 | -2.311865 | -0.029818 |
| Mg18 | -0.933475 | 3.445225  | 1.210615  |

@mg18-isomer19 bp86/6-31G(d) Etot=-3601.631658 Eb=-13.15

|     |           |           |           |
|-----|-----------|-----------|-----------|
| Mg1 | 0.532443  | -1.913976 | 1.314941  |
| Mg2 | 0.956283  | 2.580909  | -1.444731 |
| Mg3 | -1.952209 | -3.769311 | 1.898730  |
| Mg4 | -4.966307 | 0.604348  | -0.190453 |
| Mg5 | -2.444211 | -0.852564 | 0.916910  |

|      |           |           |           |
|------|-----------|-----------|-----------|
| Mg6  | -1.153354 | 4.142353  | 0.263737  |
| Mg7  | -3.088833 | -0.994493 | -2.217999 |
| Mg8  | 3.447060  | -1.341195 | 0.755179  |
| Mg9  | 5.643691  | 0.414578  | -0.484868 |
| Mg10 | -0.106593 | -0.382146 | -1.578652 |
| Mg11 | 2.082348  | 0.198809  | 3.000401  |
| Mg12 | 1.806763  | -2.707642 | -1.436149 |
| Mg13 | -2.231769 | 1.785434  | -1.298814 |
| Mg14 | -1.344730 | -3.334453 | -1.056704 |
| Mg15 | -3.020003 | 2.153067  | 1.711006  |
| Mg16 | 3.040519  | 1.953960  | 0.653030  |
| Mg17 | 2.858727  | 0.235063  | -1.965913 |
| Mg18 | -0.059826 | 1.227260  | 1.160351  |

@mg18-isomer20 bp86/6-31G(d) Etot=-3601.631164 Eb=-13.13

|      |           |           |           |
|------|-----------|-----------|-----------|
| Mg1  | -2.223437 | 1.699881  | 0.404753  |
| Mg2  | -3.954007 | 0.170885  | 2.418607  |
| Mg3  | -2.872593 | 0.323117  | -2.232067 |
| Mg4  | 4.147380  | 1.401431  | 0.805469  |
| Mg5  | 0.016380  | 1.109925  | -1.827775 |
| Mg6  | 2.483489  | 2.923902  | -1.367976 |
| Mg7  | -0.623946 | -3.981207 | -0.006616 |
| Mg8  | -0.590781 | 3.986341  | -0.821255 |
| Mg9  | -0.956911 | -0.063904 | 2.596026  |
| Mg10 | 2.500859  | -0.108306 | 2.900286  |
| Mg11 | -2.536866 | -1.551514 | 0.301635  |
| Mg12 | 0.793584  | -1.122793 | 0.443954  |
| Mg13 | -5.443390 | 0.047763  | -0.222463 |
| Mg14 | -0.764224 | -1.860864 | -2.217189 |
| Mg15 | 2.862278  | -0.107967 | -1.688344 |
| Mg16 | 3.978671  | -1.680194 | 0.775787  |
| Mg17 | 2.185594  | -3.079011 | -1.351068 |
| Mg18 | 0.997920  | 1.892515  | 1.088236  |

@mg18-isomer21 bp86/6-31G(d) Etot=-3601.630070 Eb=-13.09

|      |           |           |           |
|------|-----------|-----------|-----------|
| Mg1  | -0.351041 | 0.253949  | -0.842587 |
| Mg2  | 2.050799  | 1.369924  | -2.064232 |
| Mg3  | -3.267379 | 1.307683  | -0.500367 |
| Mg4  | 1.387000  | -1.654072 | -2.236890 |
| Mg5  | -1.780232 | 0.257356  | 2.032350  |
| Mg6  | 3.301854  | -1.074048 | 2.033977  |
| Mg7  | 3.876308  | -0.734443 | -0.846300 |
| Mg8  | 1.145083  | 1.116942  | 1.767848  |
| Mg9  | 2.639893  | -3.423509 | 0.180473  |
| Mg10 | 1.617278  | 3.658133  | -0.118647 |
| Mg11 | 3.956940  | 1.809846  | 0.844531  |
| Mg12 | -5.925274 | -0.329829 | -0.900056 |
| Mg13 | -4.471379 | -1.031969 | 1.617053  |
| Mg14 | -2.431267 | -1.950656 | -0.449888 |
| Mg15 | -0.711176 | 3.041145  | -1.904324 |
| Mg16 | -1.235555 | 3.082113  | 1.070874  |
| Mg17 | -0.188700 | -3.897562 | -1.020483 |
| Mg18 | 0.386848  | -1.801004 | 1.336668  |

@mg18-isomer22 bp86/6-31G(d) Etot=-3601.629585 Eb=-13.07

|     |           |           |           |
|-----|-----------|-----------|-----------|
| Mg1 | 0.597071  | 2.022666  | 1.864620  |
| Mg2 | 2.640716  | 2.297667  | -0.465781 |
| Mg3 | 2.647637  | -0.261890 | 1.455946  |
| Mg4 | -2.387835 | 0.644637  | 1.190729  |
| Mg5 | -1.523348 | 2.775307  | -0.803335 |
| Mg6 | 0.249260  | 0.265320  | -0.656389 |
| Mg7 | 0.665638  | 4.580694  | 0.295654  |
| Mg8 | -1.867975 | -2.592108 | -0.371277 |
| Mg9 | -0.216239 | -1.321982 | 2.110786  |



|      |           |           |           |
|------|-----------|-----------|-----------|
| Mg10 | 2.997179  | -0.586312 | -1.689636 |
| Mg11 | -0.118819 | -2.045544 | -2.620696 |
| Mg12 | -4.805192 | -1.120568 | -0.109546 |
| Mg13 | 4.638013  | -2.331689 | 0.310193  |
| Mg14 | -2.477003 | -0.004275 | -1.979868 |
| Mg15 | 1.492560  | -2.784078 | -0.063840 |
| Mg16 | 5.328559  | 0.715894  | -0.042556 |
| Mg17 | -3.243440 | -2.151714 | 2.248598  |
| Mg18 | -4.616781 | 1.897974  | -0.673600 |

@mg18-isomer23 bp86/6-31G(d) Etot=-3601.629296 Eb=-13.06

|      |           |           |           |
|------|-----------|-----------|-----------|
| Mg1  | -1.491970 | 1.010796  | 1.685080  |
| Mg2  | -0.346419 | 0.878583  | -1.400807 |
| Mg3  | 0.291189  | -1.091945 | 3.177700  |
| Mg4  | 2.623724  | 1.424787  | -0.501461 |
| Mg5  | -2.781294 | -1.710533 | 2.229256  |
| Mg6  | 2.665537  | -1.176826 | 1.292896  |
| Mg7  | 3.335849  | -3.708641 | -0.473355 |
| Mg8  | 1.831080  | -1.320070 | -1.715130 |
| Mg9  | -0.432350 | -1.946137 | 0.304271  |
| Mg10 | -2.691863 | 2.656137  | -0.552278 |
| Mg11 | 0.321959  | 3.344398  | 0.509110  |
| Mg12 | -4.432131 | 0.392839  | 0.615145  |
| Mg13 | -1.297095 | -1.790032 | -2.679432 |
| Mg14 | -3.418509 | 0.313631  | -2.331023 |
| Mg15 | 1.750904  | 1.505743  | 2.454755  |
| Mg16 | -3.478244 | -2.294489 | -0.675888 |
| Mg17 | 4.958612  | -1.027584 | -0.831791 |
| Mg18 | 2.591023  | 4.539343  | -1.107049 |

@mg19-isomer01 bp86/6-31G(d) Etot=-3801.797339 Eb=-15.62

|      |           |           |           |
|------|-----------|-----------|-----------|
| Mg1  | -0.100383 | 3.710950  | 0.051661  |
| Mg2  | 2.728553  | -0.000427 | 2.336681  |
| Mg3  | 0.428991  | -1.977902 | 2.482297  |
| Mg4  | -2.369543 | -2.625379 | -1.552683 |
| Mg5  | 0.495253  | 2.148154  | -2.453582 |
| Mg6  | -2.432722 | 2.618135  | 1.494618  |
| Mg7  | 4.612153  | 0.002499  | -0.013547 |
| Mg8  | -1.915576 | -0.003575 | 2.802412  |
| Mg9  | 2.378891  | 2.024049  | 0.041095  |
| Mg10 | -0.096825 | -3.710379 | 0.047153  |
| Mg11 | 2.617495  | 0.002407  | -2.289090 |
| Mg12 | 0.427770  | 1.974556  | 2.484558  |
| Mg13 | -3.117663 | -0.000907 | -0.072362 |
| Mg14 | -0.029685 | -0.000647 | -0.028241 |
| Mg15 | 0.498039  | -2.145216 | -2.456758 |
| Mg16 | -2.372704 | 2.627755  | -1.550033 |
| Mg17 | -1.701367 | 0.001523  | -2.854233 |
| Mg18 | 2.380521  | -2.021806 | 0.038661  |
| Mg19 | -2.431198 | -2.623791 | 1.491391  |

@mg19-isomer02 bp86/6-31G(d) Etot=-3801.794159 Eb=-15.52

|      |           |           |           |
|------|-----------|-----------|-----------|
| Mg1  | -1.604211 | -1.024764 | 2.450441  |
| Mg2  | -0.000951 | -3.516771 | 1.569856  |
| Mg3  | -0.002940 | -3.518575 | -1.566451 |
| Mg4  | 1.562035  | 2.851205  | -0.001946 |
| Mg5  | 3.308308  | 0.130754  | -0.000864 |
| Mg6  | 3.021239  | 1.799039  | -2.455459 |
| Mg7  | -3.020300 | 1.804605  | 2.453399  |
| Mg8  | -1.606078 | -1.027066 | -2.449085 |
| Mg9  | 0.000472  | -0.211166 | 0.000028  |
| Mg10 | -3.022615 | 1.803806  | -2.451601 |
| Mg11 | 1.602461  | -1.029917 | -2.451811 |
| Mg12 | 3.025111  | 1.801882  | 2.451453  |

|      |           |           |           |
|------|-----------|-----------|-----------|
| Mg13 | -0.001197 | 1.817036  | -2.438456 |
| Mg14 | 0.002417  | 1.819285  | 2.437067  |
| Mg15 | 2.377993  | -2.729186 | -0.000592 |
| Mg16 | -2.380534 | -2.726907 | 0.002866  |
| Mg17 | -3.308912 | 0.133375  | 0.000626  |
| Mg18 | -1.557580 | 2.850553  | 0.000195  |
| Mg19 | 1.605283  | -1.027188 | 2.450334  |

@mg19-isomer03 bp86/6-31G(d) Etot=-3801.793940 Eb=-15.51

|      |           |           |           |
|------|-----------|-----------|-----------|
| Mg1  | -3.948639 | -0.518704 | 2.031056  |
| Mg2  | -0.006901 | 0.109364  | -0.158053 |
| Mg3  | 3.961811  | -0.703157 | 1.993306  |
| Mg4  | -2.864232 | -1.519016 | -0.653411 |
| Mg5  | -0.601227 | 3.285448  | 1.553983  |
| Mg6  | -1.326517 | -2.371462 | -3.079910 |
| Mg7  | -1.823925 | 0.667575  | -2.578441 |
| Mg8  | -1.145196 | 0.518264  | 2.703784  |
| Mg9  | 1.764795  | 1.404063  | 2.098594  |
| Mg10 | 1.536750  | -1.434595 | -2.587695 |
| Mg11 | 3.053174  | 0.529375  | -0.645528 |
| Mg12 | 1.119904  | -1.740272 | 2.145270  |
| Mg13 | 1.109883  | 1.648242  | -2.702266 |
| Mg14 | -0.986891 | 3.427210  | -1.448717 |
| Mg15 | 1.778095  | 3.340718  | -0.254853 |
| Mg16 | -1.762742 | -2.571810 | 1.992178  |
| Mg17 | -0.036671 | -3.113799 | -0.444217 |
| Mg18 | -2.771686 | 1.594326  | 0.218653  |
| Mg19 | 2.950216  | -2.551770 | -0.183732 |

@mg19-isomer04 bp86/6-31G(d) Etot=-3801.791717 Eb=-15.44

|      |           |           |           |
|------|-----------|-----------|-----------|
| Mg1  | 0.494067  | -3.264925 | 1.471945  |
| Mg2  | -0.647746 | 2.407694  | -2.632342 |
| Mg3  | -3.226126 | 1.358347  | -1.763580 |
| Mg4  | -0.206108 | -0.015796 | 0.007160  |
| Mg5  | -2.224358 | -2.333933 | 2.003415  |
| Mg6  | 0.037155  | -0.570336 | 3.013808  |
| Mg7  | -1.413454 | -3.558064 | -0.811393 |
| Mg8  | 3.706324  | 1.337110  | -0.190655 |
| Mg9  | 4.024990  | -1.282918 | -1.630538 |
| Mg10 | 1.723854  | 0.589326  | -2.340155 |
| Mg11 | -1.886889 | 3.348677  | 0.005764  |
| Mg12 | 2.288693  | 1.538876  | 2.494298  |
| Mg13 | -2.657623 | 0.743332  | 1.569305  |
| Mg14 | 1.256841  | -2.419651 | -1.417625 |
| Mg15 | -0.488620 | 2.626145  | 2.538521  |
| Mg16 | 1.121890  | 2.867362  | -0.155649 |
| Mg17 | 2.563906  | -1.153051 | 1.144178  |
| Mg18 | -3.289221 | -1.310787 | -0.579201 |
| Mg19 | -1.177576 | -0.907408 | -2.727256 |

@mg19-isomer05 bp86/6-31G(d) Etot=-3801.791042 Eb=-15.42

|      |           |           |           |
|------|-----------|-----------|-----------|
| Mg1  | -0.123748 | -0.071515 | -0.000192 |
| Mg2  | 1.995411  | -2.367391 | 0.004523  |
| Mg3  | 2.316876  | 0.015780  | 2.072049  |
| Mg4  | 0.566801  | 2.696020  | 1.558862  |
| Mg5  | 0.567920  | 2.690894  | -1.567575 |
| Mg6  | 2.318609  | 0.008402  | -2.070676 |
| Mg7  | -0.314246 | 0.443743  | 3.520884  |
| Mg8  | -1.647091 | 4.054809  | -0.007173 |
| Mg9  | -0.311703 | 0.431341  | -3.522070 |
| Mg10 | 0.509756  | -2.491748 | -2.574670 |
| Mg11 | 0.507794  | -2.482572 | 2.583018  |
| Mg12 | 4.458573  | -0.611679 | 0.002648  |
| Mg13 | -2.391529 | 1.485653  | -1.568713 |

|      |           |           |           |
|------|-----------|-----------|-----------|
| Mg14 | -2.334318 | -1.690103 | -2.627773 |
| Mg15 | -1.118295 | -3.118472 | 0.004780  |
| Mg16 | -2.336352 | -1.680648 | 2.632039  |
| Mg17 | -2.392578 | 1.490924  | 1.562284  |
| Mg18 | -3.314591 | -0.933324 | 0.000382  |
| Mg19 | 3.042710  | 2.129886  | -0.002626 |

@mg19-isomer06 bp86/6-31G(d) Etot=-3801.789742 Eb=-15.37

|      |           |           |           |
|------|-----------|-----------|-----------|
| Mg1  | 2.048384  | -0.120085 | -2.253023 |
| Mg2  | -2.529493 | -2.112574 | -1.708801 |
| Mg3  | 2.105478  | -2.535907 | -0.223536 |
| Mg4  | 0.561583  | 2.568213  | -1.375008 |
| Mg5  | 3.823251  | -0.064448 | 0.226060  |
| Mg6  | -1.119089 | 0.334172  | -2.809945 |
| Mg7  | -2.367749 | -1.613406 | 1.387979  |
| Mg8  | 2.488528  | -0.507500 | 2.781108  |
| Mg9  | 3.511172  | 2.494107  | -1.212946 |
| Mg10 | -3.127375 | 0.632888  | -0.492929 |
| Mg11 | -3.244134 | 1.237331  | 2.449354  |
| Mg12 | 0.296453  | -2.540955 | 2.337024  |
| Mg13 | 1.842174  | 2.144799  | 1.404471  |
| Mg14 | -0.673867 | -3.843731 | -0.155172 |
| Mg15 | -2.331652 | 3.166959  | -1.780024 |
| Mg16 | 0.027259  | -0.213486 | 0.036241  |
| Mg17 | -0.353209 | 0.639094  | 3.011016  |
| Mg18 | -1.193647 | 2.904752  | 1.073328  |
| Mg19 | 0.235933  | -2.570222 | -2.695198 |

@mg19-isomer07 bp86/6-31G(d) Etot=-3801.780937 Eb=-15.08

|      |           |           |           |
|------|-----------|-----------|-----------|
| Mg1  | 1.498251  | 3.224790  | -2.531591 |
| Mg2  | -1.275928 | -2.544194 | -2.340395 |
| Mg3  | 2.701846  | -1.484496 | -0.469385 |
| Mg4  | -1.319789 | 2.524294  | -2.342205 |
| Mg5  | 0.749174  | 0.004811  | -2.562005 |
| Mg6  | 0.169887  | 3.284305  | 0.313389  |
| Mg7  | 1.551087  | -3.207288 | -2.527460 |
| Mg8  | -1.300334 | 1.579547  | 2.638198  |
| Mg9  | 1.701933  | 1.625304  | 2.430056  |
| Mg10 | -2.827275 | 2.562187  | 0.199219  |
| Mg11 | 2.680648  | 1.528935  | -0.469136 |
| Mg12 | -1.275502 | -1.598978 | 2.637851  |
| Mg13 | -0.130313 | 0.000693  | 0.269169  |
| Mg14 | -2.785713 | -2.607012 | 0.199657  |
| Mg15 | -2.624081 | -0.020940 | -1.532237 |
| Mg16 | 4.158307  | 0.032500  | 1.754486  |
| Mg17 | 1.726027  | -1.594637 | 2.430570  |
| Mg18 | -3.620829 | -0.028205 | 1.585387  |
| Mg19 | 0.222603  | -3.281619 | 0.316432  |

@mg19-isomer08 bp86/6-31G(d) Etot=-3801.780243 Eb=-15.06

|      |           |           |           |
|------|-----------|-----------|-----------|
| Mg1  | 0.152330  | -0.084412 | -0.156194 |
| Mg2  | -1.340925 | 0.157253  | -2.826635 |
| Mg3  | 2.488600  | -2.183133 | -0.470474 |
| Mg4  | -1.731043 | -1.626926 | 2.056883  |
| Mg5  | -1.555479 | 2.993961  | -1.641072 |
| Mg6  | -4.515571 | -1.515219 | 1.144697  |
| Mg7  | 0.041869  | -2.711823 | -2.470295 |
| Mg8  | 2.026032  | -0.507998 | -2.903401 |
| Mg9  | 0.823430  | 3.137666  | 0.392348  |
| Mg10 | -0.720862 | 1.242105  | 2.532865  |
| Mg11 | 2.306192  | 1.479940  | 2.459026  |
| Mg12 | -2.082104 | 3.564508  | 1.256986  |
| Mg13 | 3.060971  | 1.077863  | -0.494073 |
| Mg14 | 4.040172  | -0.853768 | 1.742221  |

|      |           |           |           |
|------|-----------|-----------|-----------|
| Mg15 | -2.449445 | -2.145877 | -1.037822 |
| Mg16 | -2.767433 | 0.783218  | 0.060571  |
| Mg17 | 1.237987  | -1.621359 | 2.464404  |
| Mg18 | 1.130750  | 2.362093  | -2.541011 |
| Mg19 | -0.145471 | -3.548092 | 0.430973  |

@mg19-isomer09 bp86/6-31G(d) Etot=-3801.755395 Eb=-14.24

|      |           |           |           |
|------|-----------|-----------|-----------|
| Mg1  | 2.678683  | -2.617336 | -1.073957 |
| Mg2  | 0.177836  | 0.002917  | -0.216791 |
| Mg3  | -0.039065 | -2.200146 | -2.435903 |
| Mg4  | 0.176532  | -3.689233 | 0.343742  |
| Mg5  | -1.292469 | -1.528020 | 2.053149  |
| Mg6  | -2.465438 | -2.556295 | -0.643379 |
| Mg7  | 1.827361  | 1.558999  | 1.839608  |
| Mg8  | 2.180654  | 0.001166  | -2.625714 |
| Mg9  | -2.079575 | 0.012705  | -2.280481 |
| Mg10 | -1.283546 | 1.527411  | 2.061624  |
| Mg11 | -3.495957 | 0.009962  | 0.680504  |
| Mg12 | 0.197087  | 3.689036  | 0.360121  |
| Mg13 | -0.027038 | 2.215575  | -2.427507 |
| Mg14 | 3.829576  | -0.009445 | -0.034826 |
| Mg15 | -2.449656 | 2.575598  | -0.631196 |
| Mg16 | 1.817671  | -1.575299 | 1.832872  |
| Mg17 | 2.693381  | 2.609449  | -1.062296 |
| Mg18 | 4.184585  | -0.018213 | 3.023825  |
| Mg19 | -6.630622 | -0.008831 | 1.236605  |

@mg19-isomer10 bp86/6-31G(d) Etot=-3801.740949 Eb=-13.76

|      |           |           |           |
|------|-----------|-----------|-----------|
| Mg1  | -4.910424 | -0.822719 | 0.010620  |
| Mg2  | 2.239894  | 1.453334  | 2.108791  |
| Mg3  | -2.553728 | 0.253410  | -1.744936 |
| Mg4  | 1.329743  | 3.319854  | -0.438186 |
| Mg5  | -0.116311 | -1.617168 | -1.589318 |
| Mg6  | -0.176233 | -3.982638 | 0.334861  |
| Mg7  | -3.052705 | 1.298066  | 1.453026  |
| Mg8  | 2.734890  | -2.303564 | -0.906122 |
| Mg9  | 4.169411  | 2.109440  | -0.203718 |
| Mg10 | -0.583671 | 0.385355  | 3.153355  |
| Mg11 | -1.858741 | 3.219097  | -0.844257 |
| Mg12 | 4.316477  | -0.629621 | 1.141040  |
| Mg13 | 2.002706  | 0.628560  | -1.886421 |
| Mg14 | -1.970840 | -1.623813 | 1.390378  |
| Mg15 | -4.776498 | 2.140133  | -0.863394 |
| Mg16 | 1.389967  | -1.495276 | 1.659621  |
| Mg17 | -0.218891 | 0.829478  | 0.177042  |
| Mg18 | -2.917614 | -2.811101 | -1.167261 |
| Mg19 | 4.952568  | -0.350826 | -1.785119 |

@mg19-isomer11 bp86/6-31G(d) Etot=-3801.734358 Eb=-13.54

|      |           |           |           |
|------|-----------|-----------|-----------|
| Mg1  | -0.696794 | 0.105308  | -0.606339 |
| Mg2  | 0.054572  | -1.467588 | 1.996584  |
| Mg3  | 1.487285  | 0.555598  | -2.584473 |
| Mg4  | -2.944296 | -1.173977 | 1.458613  |
| Mg5  | -5.176058 | 0.215718  | -0.490777 |
| Mg6  | 1.896674  | -1.694562 | -0.571098 |
| Mg7  | 1.741247  | 1.111115  | 1.401303  |
| Mg8  | -2.932314 | 2.236306  | -0.578570 |
| Mg9  | -1.257114 | -2.718589 | -0.742740 |
| Mg10 | -2.892285 | -0.270198 | -2.520258 |
| Mg11 | 0.143938  | 2.892249  | -0.461543 |
| Mg12 | -1.305465 | 1.442506  | 2.062640  |
| Mg13 | 3.092024  | -1.386124 | 2.374887  |
| Mg14 | 3.163203  | 2.459169  | -0.967073 |
| Mg15 | -4.250815 | -2.550494 | -1.055352 |

|      |           |           |           |
|------|-----------|-----------|-----------|
| Mg16 | -4.387376 | 1.424114  | 2.099087  |
| Mg17 | 4.402014  | -0.073088 | -2.022977 |
| Mg18 | 4.855734  | 0.860757  | 1.023561  |
| Mg19 | 5.005824  | -1.968218 | 0.184525  |

@mg19-isomer12 bp86/6-31G(d) Etot=-3801.732760 Eb=-13.49

|      |           |           |           |
|------|-----------|-----------|-----------|
| Mg1  | 0.315605  | 2.159022  | -1.624258 |
| Mg2  | -2.798491 | 1.454482  | -1.965776 |
| Mg3  | 1.232140  | -2.770309 | 0.425229  |
| Mg4  | -0.915718 | -0.622403 | -0.838880 |
| Mg5  | 3.337144  | 2.499704  | -1.264142 |
| Mg6  | -1.419611 | 2.103849  | 0.785497  |
| Mg7  | -4.918069 | -0.048257 | -0.305410 |
| Mg8  | -1.155632 | -3.958519 | -0.935030 |
| Mg9  | -2.938480 | -2.091853 | 0.909427  |
| Mg10 | 4.796088  | 0.984779  | 0.902866  |
| Mg11 | -4.299716 | 2.841294  | 0.329952  |
| Mg12 | -3.389250 | 0.453427  | 2.335828  |
| Mg13 | 5.116534  | 0.008284  | -1.932379 |
| Mg14 | -3.379626 | -1.761455 | -2.166993 |
| Mg15 | 1.762359  | 2.171330  | 1.419946  |
| Mg16 | 4.459239  | -1.984705 | 0.286521  |
| Mg17 | -0.508196 | -0.505399 | 2.190404  |
| Mg18 | 2.548535  | -0.682505 | 2.352691  |
| Mg19 | 2.155144  | -0.250766 | -0.905491 |

@mg19-isomer13 bp86/6-31G(d) Etot=-3801.729414 Eb=-13.38

|      |           |           |           |
|------|-----------|-----------|-----------|
| Mg1  | -0.772136 | -1.795329 | -1.697802 |
| Mg2  | 1.880693  | -0.237985 | -1.202063 |
| Mg3  | 2.327105  | 1.342185  | 1.533660  |
| Mg4  | 4.759031  | -1.656204 | -1.198864 |
| Mg5  | 4.558341  | 1.297425  | -0.615026 |
| Mg6  | -4.299920 | 1.637528  | -0.690021 |
| Mg7  | 0.859566  | 2.562337  | -0.849816 |
| Mg8  | -2.697483 | -1.991716 | 0.715661  |
| Mg9  | 3.396718  | 4.042247  | -0.028457 |
| Mg10 | -3.655605 | -1.046471 | -2.122527 |
| Mg11 | -5.426543 | -0.829950 | 0.565326  |
| Mg12 | -1.686585 | 1.233638  | -2.248846 |
| Mg13 | -3.400658 | 0.791166  | 2.153243  |
| Mg14 | 0.268614  | -2.749546 | 1.025522  |
| Mg15 | 1.153207  | -0.795385 | 3.368864  |
| Mg16 | 2.128011  | -3.292765 | -1.213113 |
| Mg17 | 3.140781  | -1.735349 | 1.336581  |
| Mg18 | -1.900618 | 2.968275  | 0.409872  |
| Mg19 | -0.632519 | 0.255898  | 0.757807  |

@mg19-isomer14 bp86/6-31G(d) Etot=-3801.718532 Eb=-13.02

|      |           |           |           |
|------|-----------|-----------|-----------|
| Mg1  | -2.522677 | 0.064928  | -1.455136 |
| Mg2  | 0.011764  | 1.180730  | -0.290950 |
| Mg3  | -2.386462 | 1.729838  | 1.800450  |
| Mg4  | -2.580903 | -2.867632 | -0.492326 |
| Mg5  | -2.188830 | 3.133461  | -1.010954 |
| Mg6  | 0.105829  | -1.497518 | -1.666386 |
| Mg7  | -4.151147 | -0.908263 | 1.724978  |
| Mg8  | 2.391158  | 0.648226  | -2.007233 |
| Mg9  | 2.034556  | -1.068834 | 1.190202  |
| Mg10 | 4.781366  | -0.229967 | -0.168147 |
| Mg11 | 0.636720  | 1.190286  | 2.657793  |
| Mg12 | -5.324783 | -1.378422 | -0.947298 |
| Mg13 | 7.740643  | -0.074896 | 0.792601  |
| Mg14 | -4.902573 | 1.575205  | 0.106988  |
| Mg15 | -1.086404 | -1.144772 | 1.420223  |
| Mg16 | 3.006704  | -2.408173 | -1.278233 |

|      |          |           |           |
|------|----------|-----------|-----------|
| Mg17 | 2.955342 | 2.069823  | 0.659331  |
| Mg18 | 1.002821 | 3.687045  | -1.427172 |
| Mg19 | 0.476878 | -3.701066 | 0.391268  |

@mg19-isomer15 bp86/6-31G(d) Etot=-3801.710890 Eb=-12.77

|      |           |           |           |
|------|-----------|-----------|-----------|
| Mg1  | -2.069079 | -1.244760 | -0.665902 |
| Mg2  | 0.380549  | 1.355714  | -0.504476 |
| Mg3  | 0.896245  | -1.897994 | 0.406182  |
| Mg4  | -0.448245 | 0.242123  | 2.266457  |
| Mg5  | -3.491683 | -0.201909 | 2.434075  |
| Mg6  | -2.411077 | 2.236400  | 0.807996  |
| Mg7  | 2.636146  | 0.411352  | 1.500770  |
| Mg8  | 2.004511  | -3.246286 | -2.132404 |
| Mg9  | 5.387203  | 0.405807  | -0.001433 |
| Mg10 | 2.807339  | -0.248977 | -1.721903 |
| Mg11 | -1.569522 | -2.646162 | 1.986145  |
| Mg12 | 4.856864  | 2.848620  | 1.933350  |
| Mg13 | 3.298543  | 2.585614  | -0.649818 |
| Mg14 | -4.830441 | 0.521411  | -0.196481 |
| Mg15 | 3.972920  | -2.391990 | 0.291209  |
| Mg16 | -4.671077 | 3.271136  | -1.497583 |
| Mg17 | -2.256987 | 1.365189  | -2.162463 |
| Mg18 | -4.553915 | -2.472916 | 0.630253  |
| Mg19 | 0.061703  | -0.892374 | -2.723974 |

@mg20-isomer01 bp86/6-31G(d) Etot=-4001.911195 Eb=-16.23

|      |           |           |           |
|------|-----------|-----------|-----------|
| Mg1  | 0.001896  | 0.000327  | -3.051814 |
| Mg2  | 2.033383  | 4.094754  | -0.491722 |
| Mg3  | 2.613445  | -0.952119 | -1.538777 |
| Mg4  | 2.330608  | 1.886642  | -2.477025 |
| Mg5  | 0.470129  | -2.959974 | -2.477563 |
| Mg6  | -0.479328 | 2.735567  | -1.537588 |
| Mg7  | 2.330453  | -1.564399 | 1.541603  |
| Mg8  | -0.234702 | -3.049405 | 0.576596  |
| Mg9  | -4.563535 | -0.287815 | -0.496907 |
| Mg10 | -2.521934 | -1.236646 | 1.537291  |
| Mg11 | 0.000311  | -0.000699 | 0.119248  |
| Mg12 | 1.547820  | 0.779981  | 3.372689  |
| Mg13 | 2.530855  | -3.807668 | -0.490501 |
| Mg14 | 0.187565  | 2.800537  | 1.539063  |
| Mg15 | 2.758623  | 1.321779  | 0.578836  |
| Mg16 | -1.452825 | 0.953588  | 3.370711  |
| Mg17 | -2.128822 | -1.783649 | -1.541480 |
| Mg18 | -0.103111 | -1.733075 | 3.370632  |
| Mg19 | -2.796227 | 1.075686  | -2.479390 |
| Mg20 | -2.524603 | 1.726587  | 0.576098  |

@mg20-isomer02 bp86/6-31G(d) Etot=-4001.907113 Eb=-16.10

|      |           |           |           |
|------|-----------|-----------|-----------|
| Mg1  | -2.096549 | -1.681955 | -2.633356 |
| Mg2  | 2.224336  | 0.718125  | 1.947062  |
| Mg3  | -3.103184 | -0.455825 | -0.001915 |
| Mg4  | 0.835314  | -2.130833 | 2.158499  |
| Mg5  | -2.100823 | -1.686095 | 2.628414  |
| Mg6  | -0.090560 | 2.699131  | 1.754890  |
| Mg7  | -2.746739 | 1.279208  | 2.694664  |
| Mg8  | -0.123008 | 0.040835  | 0.001103  |
| Mg9  | 2.875020  | -1.539462 | 0.002378  |
| Mg10 | 1.392300  | -4.266886 | -0.000534 |
| Mg11 | 4.499497  | 1.092363  | 0.002372  |
| Mg12 | 2.348512  | 3.172269  | 0.001943  |
| Mg13 | 0.837976  | -2.126732 | -2.157891 |
| Mg14 | -2.539037 | 2.498537  | 0.001096  |
| Mg15 | 2.224543  | 0.716195  | -1.943191 |
| Mg16 | -2.741879 | 1.282387  | -2.696303 |

|      |           |           |           |
|------|-----------|-----------|-----------|
| Mg17 | -0.151235 | 0.333124  | -3.694163 |
| Mg18 | -0.089649 | 2.697610  | -1.751567 |
| Mg19 | -0.156812 | 0.329534  | 3.689518  |
| Mg20 | -1.298024 | -2.971527 | -0.003021 |

@mg20-isomer03 bp86/6-31G(d) Etot=-4001.906578 Eb=-16.08

|      |           |           |           |
|------|-----------|-----------|-----------|
| Mg1  | -0.085647 | 0.008128  | 0.002681  |
| Mg2  | -0.756950 | -3.673811 | 0.019802  |
| Mg3  | 3.325921  | -0.447553 | -0.031283 |
| Mg4  | 1.415202  | -2.249199 | 1.551625  |
| Mg5  | 3.203307  | -0.442934 | -3.155733 |
| Mg6  | 1.932369  | 1.800870  | -1.578641 |
| Mg7  | 0.157970  | -0.034987 | -3.339232 |
| Mg8  | -1.578106 | -2.308143 | -2.462396 |
| Mg9  | 0.224419  | -0.015674 | 3.342385  |
| Mg10 | 3.266988  | -0.424392 | 3.094030  |
| Mg11 | -2.659268 | 0.364175  | 1.573485  |
| Mg12 | -1.534242 | -2.286798 | 2.504299  |
| Mg13 | 1.386424  | -2.258455 | -1.561909 |
| Mg14 | -2.663630 | 2.992696  | 0.015414  |
| Mg15 | 0.240073  | 3.747610  | -0.010902 |
| Mg16 | -0.915453 | 2.621522  | -2.479863 |
| Mg17 | -2.684572 | 0.353133  | -1.532036 |
| Mg18 | 1.958949  | 1.807171  | 1.530927  |
| Mg19 | -3.362578 | -2.184730 | 0.035049  |
| Mg20 | -0.871177 | 2.631370  | 2.482298  |

@mg20-isomer04 bp86/6-31G(d) Etot=-4001.900667 Eb=-15.90

|      |           |           |           |
|------|-----------|-----------|-----------|
| Mg1  | -2.673391 | -1.757529 | -0.479205 |
| Mg2  | -1.829842 | -0.918727 | -3.246817 |
| Mg3  | -1.236970 | -4.368556 | 0.302773  |
| Mg4  | -1.821875 | -2.360548 | 2.415787  |
| Mg5  | -2.681942 | 1.284677  | -1.272086 |
| Mg6  | 0.127324  | -2.629157 | -1.720523 |
| Mg7  | -2.674472 | 0.451564  | 1.754952  |
| Mg8  | -1.256047 | 1.917908  | -3.930817 |
| Mg9  | 0.122412  | -0.174421 | 3.136286  |
| Mg10 | -0.013898 | -0.001332 | -0.001165 |
| Mg11 | 1.129535  | -2.647175 | 1.324591  |
| Mg12 | -1.840768 | 3.266270  | 0.834177  |
| Mg13 | -1.254897 | 2.439635  | 3.630379  |
| Mg14 | 0.110139  | 2.804037  | -1.415221 |
| Mg15 | 1.117774  | 0.179028  | -2.956017 |
| Mg16 | 1.112193  | 2.474011  | 1.630412  |
| Mg17 | 2.808320  | -1.532168 | -0.996590 |
| Mg18 | 2.806364  | -0.086726 | 1.830875  |
| Mg19 | 2.797359  | 1.641203  | -0.837753 |
| Mg20 | 5.152684  | 0.018004  | -0.004037 |

@mg20-isomer05 bp86/6-31G(d) Etot=-4001.900006 Eb=-15.88

|      |           |           |           |
|------|-----------|-----------|-----------|
| Mg1  | 2.511619  | 1.766785  | -0.797812 |
| Mg2  | 0.004793  | -1.877366 | -3.371871 |
| Mg3  | 3.025952  | -1.004343 | 0.462697  |
| Mg4  | 2.594986  | -0.614501 | -2.628243 |
| Mg5  | 2.726131  | 1.448440  | 2.246362  |
| Mg6  | 0.190548  | 1.182939  | -2.875703 |
| Mg7  | 1.134491  | -3.093857 | 1.503141  |
| Mg8  | -0.226556 | 1.324757  | 2.780271  |
| Mg9  | -1.471378 | 2.287593  | -0.369597 |
| Mg10 | -2.970822 | 0.869667  | 1.903085  |
| Mg11 | 0.153723  | -0.198987 | 0.045683  |
| Mg12 | -1.133118 | -2.903218 | -0.582259 |
| Mg13 | 1.592327  | -1.024457 | 3.579130  |
| Mg14 | -2.210024 | -0.399026 | -1.966829 |

|      |           |           |           |
|------|-----------|-----------|-----------|
| Mg15 | 1.814466  | -3.233728 | -1.410156 |
| Mg16 | -3.663749 | -1.637945 | 0.460350  |
| Mg17 | 0.915855  | 3.569467  | 1.095368  |
| Mg18 | -1.321502 | -1.598706 | 2.504034  |
| Mg19 | 0.711965  | 3.979456  | -1.876038 |
| Mg20 | -4.379708 | 1.157029  | -0.701614 |

@mg20-isomer06 bp86/6-31G(d) Etot=-4001.899622 Eb=-15.87

|      |           |           |           |
|------|-----------|-----------|-----------|
| Mg1  | 0.046289  | 0.008943  | 0.000106  |
| Mg2  | -0.355720 | 1.871062  | 2.581073  |
| Mg3  | 2.541932  | 1.820891  | -0.522661 |
| Mg4  | -2.295584 | -0.456744 | 2.381894  |
| Mg5  | -2.315448 | -0.205851 | -2.398533 |
| Mg6  | 0.655812  | -1.102855 | 2.913616  |
| Mg7  | -1.452690 | -3.287112 | 2.573873  |
| Mg8  | -4.267724 | -0.610178 | -0.014169 |
| Mg9  | 0.800808  | -3.141958 | 0.460659  |
| Mg10 | 2.945656  | -1.032499 | 0.537419  |
| Mg11 | 2.804289  | -3.171886 | -1.761997 |
| Mg12 | -2.543180 | 1.772921  | 0.338028  |
| Mg13 | -1.937764 | -2.410053 | -0.348847 |
| Mg14 | 2.843529  | -0.350679 | -2.599472 |
| Mg15 | -2.303424 | 2.746467  | -2.584705 |
| Mg16 | 0.204934  | -1.892530 | -2.579092 |
| Mg17 | -0.111870 | 3.238943  | -0.458674 |
| Mg18 | 0.340736  | 1.243146  | -2.911510 |
| Mg19 | 2.612712  | 1.131526  | 2.614797  |
| Mg20 | 1.786705  | 3.828446  | 1.778193  |

@mg20-isomer07 bp86/6-31G(d) Etot=-4001.893814 Eb=-15.68

|      |           |           |           |
|------|-----------|-----------|-----------|
| Mg1  | -0.014329 | 3.186668  | 1.994377  |
| Mg2  | -1.488203 | 3.559623  | -0.625839 |
| Mg3  | -2.436442 | 1.449338  | 1.337054  |
| Mg4  | 0.003414  | 0.436189  | 3.400606  |
| Mg5  | 1.451373  | 3.571987  | -0.627759 |
| Mg6  | -0.010714 | 2.118194  | -2.910962 |
| Mg7  | -3.910501 | -1.042728 | 0.011139  |
| Mg8  | 2.421216  | 1.468616  | 1.335726  |
| Mg9  | -2.362187 | 0.836138  | -1.717075 |
| Mg10 | -0.003690 | 0.076725  | 0.223331  |
| Mg11 | 0.014207  | -2.604917 | 2.504786  |
| Mg12 | -2.882829 | -2.018851 | -2.785771 |
| Mg13 | 2.349407  | 0.855699  | -1.715959 |
| Mg14 | 2.537731  | -1.226290 | 2.651588  |
| Mg15 | -2.518300 | -1.245070 | 2.656209  |
| Mg16 | 0.002163  | -1.083842 | -2.621423 |
| Mg17 | -1.456945 | -2.679163 | -0.158558 |
| Mg18 | 3.924599  | -1.006223 | 0.002267  |
| Mg19 | 1.482157  | -2.659804 | -0.160950 |
| Mg20 | 2.897874  | -1.992288 | -2.792788 |

@mg20-isomer08 bp86/6-31G(d) Etot=-4001.892691 Eb=-15.65

|      |           |           |           |
|------|-----------|-----------|-----------|
| Mg1  | -0.413194 | -0.457167 | -0.011410 |
| Mg2  | 0.538363  | -2.351449 | 2.582418  |
| Mg3  | -3.666072 | -0.000574 | 0.055838  |
| Mg4  | -0.151597 | 0.673209  | 3.091217  |
| Mg5  | -2.816517 | 1.730509  | 2.385658  |
| Mg6  | 0.091788  | 1.050182  | -2.960577 |
| Mg7  | 0.218069  | -3.419989 | -0.371227 |
| Mg8  | 1.931574  | -1.105868 | -1.756575 |
| Mg9  | 2.885216  | -2.646886 | 0.770054  |
| Mg10 | -2.605383 | -0.127141 | -2.715084 |
| Mg11 | -2.621362 | -2.663326 | -0.926680 |
| Mg12 | 0.680350  | 3.805541  | -1.361563 |



|      |           |           |           |
|------|-----------|-----------|-----------|
| Mg13 | 1.519705  | 1.655728  | 0.614220  |
| Mg14 | 2.843408  | 1.911870  | -2.210731 |
| Mg15 | -2.249745 | -1.426699 | 2.192329  |
| Mg16 | -0.561836 | -2.128774 | -3.124125 |
| Mg17 | 3.978986  | 0.117001  | 0.018584  |
| Mg18 | -0.505264 | 3.525250  | 1.727020  |
| Mg19 | 2.636040  | -0.286382 | 2.687180  |
| Mg20 | -1.732530 | 2.144966  | -0.686545 |

@mg20-isomer09 bp86/6-31G(d) Etot=-4001.887140 Eb=-15.47

|      |           |           |           |
|------|-----------|-----------|-----------|
| Mg1  | -0.601044 | 3.594372  | -1.606627 |
| Mg2  | -2.424186 | -3.848980 | -1.962422 |
| Mg3  | -3.093627 | 0.819454  | 1.694488  |
| Mg4  | 1.038346  | -1.623093 | 2.601387  |
| Mg5  | -0.375190 | 1.269090  | 3.134498  |
| Mg6  | -0.767206 | -1.411693 | -2.348705 |
| Mg7  | 2.014040  | -0.606572 | -3.177505 |
| Mg8  | 2.504919  | 0.932772  | 1.761912  |
| Mg9  | -2.439055 | 1.182513  | -1.375208 |
| Mg10 | -1.926489 | -1.645649 | 2.826794  |
| Mg11 | 1.840383  | 1.833953  | -1.345881 |
| Mg12 | 4.008726  | -0.082834 | -0.764908 |
| Mg13 | -0.197050 | 0.106252  | 0.281059  |
| Mg14 | 1.787595  | -2.080059 | -0.518514 |
| Mg15 | 3.912517  | -1.682781 | 1.804560  |
| Mg16 | 0.835056  | 3.274610  | 1.097685  |
| Mg17 | -0.297606 | 1.307961  | -3.642133 |
| Mg18 | -0.697188 | -3.224335 | 0.577392  |
| Mg19 | -3.074167 | -1.551680 | -0.105550 |
| Mg20 | -2.048772 | 3.436699  | 1.067678  |

@mg20-isomer10 bp86/6-31G(d) Etot=-4001.886343 Eb=-15.45

|      |           |           |           |
|------|-----------|-----------|-----------|
| Mg1  | 0.413031  | 0.221808  | 3.169317  |
| Mg2  | -2.318827 | 0.254802  | -2.641123 |
| Mg3  | 1.558182  | -2.379144 | 1.455329  |
| Mg4  | -1.096962 | 2.588512  | 1.818312  |
| Mg5  | 1.285799  | -2.959998 | -1.792871 |
| Mg6  | 3.249340  | -0.043507 | 2.224602  |
| Mg7  | -2.854913 | -1.545071 | 0.033001  |
| Mg8  | 0.601744  | -0.337834 | -3.185831 |
| Mg9  | -0.428035 | 2.376132  | -1.550048 |
| Mg10 | 2.868165  | -0.734059 | -0.809064 |
| Mg11 | -0.166027 | -0.245290 | 0.011012  |
| Mg12 | -2.565038 | 0.158506  | 2.723146  |
| Mg13 | -2.446002 | 4.271548  | -0.486079 |
| Mg14 | 1.613750  | 2.146553  | 0.838906  |
| Mg15 | -3.177780 | 1.414132  | 0.008249  |
| Mg16 | -0.873427 | -3.733161 | 0.126274  |
| Mg17 | -1.108134 | -2.424778 | 2.883207  |
| Mg18 | 2.434035  | 1.892525  | -2.176991 |
| Mg19 | 4.476480  | 1.657237  | 0.038850  |
| Mg20 | -1.465381 | -2.578913 | -2.688200 |

@mg20-isomer11 bp86/6-31G(d) Etot=-4001.878604 Eb=-15.21

|      |           |           |           |
|------|-----------|-----------|-----------|
| Mg1  | 1.509309  | -0.599696 | 2.817460  |
| Mg2  | 1.193409  | -3.283426 | 1.522018  |
| Mg3  | -2.024258 | 2.558956  | -0.000438 |
| Mg4  | 2.780764  | -1.040591 | 0.000356  |
| Mg5  | -0.151042 | -0.013907 | 0.001492  |
| Mg6  | 2.804817  | 1.765373  | -1.521023 |
| Mg7  | -4.870674 | 1.293514  | 0.001635  |
| Mg8  | -0.138554 | 2.016489  | -2.481886 |
| Mg9  | 5.557518  | 0.635800  | 0.002250  |
| Mg10 | -0.136382 | 2.023242  | 2.480116  |

|      |           |           |           |
|------|-----------|-----------|-----------|
| Mg11 | -2.920155 | 0.828502  | 2.334516  |
| Mg12 | 1.511992  | -0.602344 | -2.818421 |
| Mg13 | 0.864927  | 3.413896  | -0.003002 |
| Mg14 | -3.108892 | -1.164411 | 0.000628  |
| Mg15 | -2.925418 | 0.829116  | -2.333699 |
| Mg16 | -1.311735 | -1.784266 | 2.457550  |
| Mg17 | 1.193657  | -3.283650 | -1.521480 |
| Mg18 | -1.310657 | -1.780299 | -2.456734 |
| Mg19 | -1.323465 | -3.579541 | -0.000456 |
| Mg20 | 2.804839  | 1.767243  | 1.519118  |

@mg20-isomer12 bp86/6-31G(d) Etot=-4001.875771 Eb=-15.12

|      |           |           |           |
|------|-----------|-----------|-----------|
| Mg1  | -1.840281 | 0.849532  | 2.277376  |
| Mg2  | 0.330580  | 0.039677  | -0.042457 |
| Mg3  | 3.172266  | -1.494808 | -1.695612 |
| Mg4  | 1.168257  | 1.195414  | 2.927725  |
| Mg5  | -0.443951 | 3.428903  | 1.613275  |
| Mg6  | -2.021927 | 1.949374  | -0.618757 |
| Mg7  | 0.483165  | 3.700672  | -1.275546 |
| Mg8  | 2.403655  | 2.982647  | 0.849371  |
| Mg9  | -2.497878 | -0.368083 | -2.643025 |
| Mg10 | 3.318481  | 0.121237  | 0.927463  |
| Mg11 | -3.510794 | -0.670633 | 0.248307  |
| Mg12 | -1.306847 | -2.146424 | 1.790884  |
| Mg13 | 3.828352  | -2.842687 | 0.914406  |
| Mg14 | 2.600629  | 1.496266  | -1.796675 |
| Mg15 | 0.354644  | -1.575872 | -2.820491 |
| Mg16 | -0.189976 | 1.449246  | -3.093243 |
| Mg17 | 1.004578  | -3.027405 | -0.128991 |
| Mg18 | -6.600377 | -0.536889 | 1.013406  |
| Mg19 | 1.573271  | -1.783902 | 2.639976  |
| Mg20 | -1.825847 | -2.766267 | -1.087394 |

@mg20-isomer13 bp86/6-31G(d) Etot=-4001.875247 Eb=-15.10

|      |           |           |           |
|------|-----------|-----------|-----------|
| Mg1  | -0.300822 | 0.089516  | 0.028801  |
| Mg2  | -1.420516 | 3.569741  | -0.711713 |
| Mg3  | 1.023800  | 2.734859  | -2.072520 |
| Mg4  | -1.393925 | 2.573571  | 2.180401  |
| Mg5  | 1.057596  | -2.823444 | -0.363008 |
| Mg6  | 1.411043  | -0.259071 | -2.581395 |
| Mg7  | 1.135686  | 0.869294  | 2.703612  |
| Mg8  | 1.098233  | 3.460315  | 0.912408  |
| Mg9  | -2.136977 | -0.405510 | 2.515791  |
| Mg10 | -3.588231 | -1.162741 | -1.832020 |
| Mg11 | -1.571561 | 1.110100  | -2.651930 |
| Mg12 | -0.954436 | -2.196547 | -2.526832 |
| Mg13 | 2.939937  | -1.442240 | 1.689141  |
| Mg14 | 3.654162  | -1.783901 | -1.315505 |
| Mg15 | 2.648240  | 1.043922  | -0.053579 |
| Mg16 | -1.903367 | -2.725817 | 0.356552  |
| Mg17 | 0.243277  | -2.290734 | 2.535520  |
| Mg18 | -4.555371 | -1.453450 | 0.981707  |
| Mg19 | 5.781069  | -0.082612 | 0.167696  |
| Mg20 | -3.167838 | 1.174750  | 0.036871  |

@mg20-isomer14 bp86/6-31G(d) Etot=-4001.872824 Eb=-15.03

|     |           |           |           |
|-----|-----------|-----------|-----------|
| Mg1 | -1.814121 | 1.472419  | -2.205491 |
| Mg2 | 0.779319  | -2.386062 | 2.470299  |
| Mg3 | -1.600237 | 3.575232  | 0.040611  |
| Mg4 | 3.124765  | -1.513055 | 0.964625  |
| Mg5 | -1.617450 | -1.788908 | -1.988792 |
| Mg6 | 1.530606  | 0.637434  | 2.639104  |
| Mg7 | 0.714763  | 3.034356  | -1.763389 |
| Mg8 | 3.554997  | -1.284634 | -2.072968 |

|      |           |           |           |
|------|-----------|-----------|-----------|
| Mg9  | -3.216036 | 0.976534  | 0.527885  |
| Mg10 | -0.280243 | 0.032552  | 0.203787  |
| Mg11 | -3.889697 | -1.950509 | 0.303850  |
| Mg12 | -1.210741 | 2.052334  | 2.633397  |
| Mg13 | 0.909353  | 0.020488  | -2.613577 |
| Mg14 | 5.811538  | -0.066833 | -0.249017 |
| Mg15 | -1.328724 | -3.320333 | 0.619824  |
| Mg16 | -4.272128 | -0.358289 | -2.111230 |
| Mg17 | -2.006832 | -1.031006 | 2.610296  |
| Mg18 | 2.621418  | 1.227537  | -0.318325 |
| Mg19 | 1.100970  | -2.671724 | -0.990484 |
| Mg20 | 1.088480  | 3.342467  | 1.299597  |

@mg20-isomer15 bp86/6-31G(d) Etot=-4001.872318 Eb=-15.01

|      |           |           |           |
|------|-----------|-----------|-----------|
| Mg1  | -5.479966 | -0.699085 | 0.040702  |
| Mg2  | -2.728291 | 0.424415  | -1.259167 |
| Mg3  | -2.766389 | -2.431972 | 0.453133  |
| Mg4  | 0.212770  | 0.622104  | -3.022642 |
| Mg5  | -1.457735 | 3.070608  | -2.447767 |
| Mg6  | -2.916253 | 0.199279  | 1.909920  |
| Mg7  | -1.428122 | -2.101036 | -2.174290 |
| Mg8  | -1.634520 | 2.630505  | 0.530899  |
| Mg9  | 0.058753  | -0.146145 | 0.003439  |
| Mg10 | -0.998164 | -1.926772 | 2.784328  |
| Mg11 | 0.253343  | -3.225790 | 0.257762  |
| Mg12 | 3.197891  | -2.544333 | -0.273842 |
| Mg13 | 1.235408  | 2.919072  | -1.212092 |
| Mg14 | -0.155822 | 1.160798  | 2.813311  |
| Mg15 | 0.768548  | 3.960997  | 1.632648  |
| Mg16 | 1.531594  | -2.153354 | -2.663289 |
| Mg17 | 1.967665  | -1.310539 | 2.153225  |
| Mg18 | 2.925407  | 0.313811  | -1.574487 |
| Mg19 | 2.516212  | 1.557509  | 1.202685  |
| Mg20 | 4.897670  | -0.320072 | 0.845523  |

@mg20-isomer16 bp86/6-31G(d) Etot=-4001.871870 Eb=-15.00

|      |           |           |           |
|------|-----------|-----------|-----------|
| Mg1  | 3.020626  | -0.674244 | -1.395075 |
| Mg2  | 5.526679  | -0.373744 | 0.967316  |
| Mg3  | 2.512440  | 1.210827  | 0.980007  |
| Mg4  | -4.385430 | -1.900836 | -0.863693 |
| Mg5  | -4.215611 | 0.664476  | 0.604422  |
| Mg6  | -2.315499 | -1.574476 | 1.496061  |
| Mg7  | 0.954712  | 3.660649  | -0.235049 |
| Mg8  | 2.205272  | 1.977015  | -2.361305 |
| Mg9  | 0.413988  | -0.610888 | -3.008167 |
| Mg10 | -2.538339 | 0.305670  | -1.914589 |
| Mg11 | -0.648811 | 2.538283  | -2.586858 |
| Mg12 | -0.032663 | 0.016699  | -0.102871 |
| Mg13 | 0.106601  | -3.296780 | 1.290212  |
| Mg14 | -1.880470 | 2.596796  | 0.216907  |
| Mg15 | 2.703570  | -1.946390 | 1.311819  |
| Mg16 | -1.445534 | -2.544475 | -1.300848 |
| Mg17 | 0.441504  | -0.595115 | 2.851550  |
| Mg18 | 1.474248  | -3.172876 | -1.355144 |
| Mg19 | 0.307100  | 2.651466  | 2.493832  |
| Mg20 | -2.204384 | 1.067942  | 2.911472  |

@mg20-isomer17 bp86/6-31G(d) Etot=-4001.869593 Eb=-14.92

|     |           |           |           |
|-----|-----------|-----------|-----------|
| Mg1 | -1.358278 | -2.818798 | -0.027404 |
| Mg2 | -3.426559 | -0.722751 | 0.830579  |
| Mg3 | 3.768842  | 1.610731  | 2.021934  |
| Mg4 | -2.021517 | -0.305073 | -1.854530 |
| Mg5 | 0.918421  | -2.724806 | 2.165015  |
| Mg6 | -3.718774 | 1.965799  | -0.436155 |

|      |           |           |           |
|------|-----------|-----------|-----------|
| Mg7  | 2.827725  | -1.540048 | -2.248613 |
| Mg8  | 1.566651  | -3.675227 | -0.583789 |
| Mg9  | 0.380552  | -0.216070 | 0.049083  |
| Mg10 | 1.113843  | 0.471637  | 2.951678  |
| Mg11 | 3.244039  | 1.184111  | -0.891419 |
| Mg12 | -0.874618 | 2.507401  | -1.003608 |
| Mg13 | -6.407351 | 0.161684  | -0.454594 |
| Mg14 | 0.018244  | -2.407195 | -2.780953 |
| Mg15 | -1.579293 | 1.641573  | 1.851253  |
| Mg16 | 0.899491  | 0.730251  | -2.855720 |
| Mg17 | 1.788514  | 3.609649  | -1.772039 |
| Mg18 | 3.169451  | -1.250744 | 0.866974  |
| Mg19 | -1.521484 | -1.174433 | 2.998111  |
| Mg20 | 1.212101  | 2.952308  | 1.174197  |

@mg20-isomer18 bp86/6-31G(d) Etot=-4001.868503 Eb=-14.89

|      |           |           |           |
|------|-----------|-----------|-----------|
| Mg1  | -0.698920 | 2.756364  | -2.165400 |
| Mg2  | 4.569717  | -0.690895 | 1.545429  |
| Mg3  | -0.771081 | -1.397765 | 2.550004  |
| Mg4  | -5.413348 | 0.607063  | -0.077280 |
| Mg5  | 2.123530  | 3.546656  | -1.956819 |
| Mg6  | 3.195301  | 1.399733  | -0.131343 |
| Mg7  | -0.984017 | 1.806153  | 2.708388  |
| Mg8  | 1.612901  | 0.532709  | -2.642877 |
| Mg9  | 2.119725  | -2.340862 | 2.159309  |
| Mg10 | 1.894019  | 0.776977  | 2.558558  |
| Mg11 | 0.575901  | 3.178600  | 0.622481  |
| Mg12 | 0.774395  | -2.392531 | -2.744849 |
| Mg13 | -1.661072 | -0.148971 | -2.383920 |
| Mg14 | -2.664898 | -1.513684 | 0.169081  |
| Mg15 | -3.499942 | 0.272596  | 2.469840  |
| Mg16 | 0.121896  | -3.264570 | 0.114102  |
| Mg17 | -2.437756 | 1.876555  | 0.049553  |
| Mg18 | 2.876333  | -1.747757 | -0.758388 |
| Mg19 | -1.966147 | -3.251251 | -2.150109 |
| Mg20 | 0.233463  | -0.005118 | 0.064241  |

@mg20-isomer19 bp86/6-31G(d) Etot=-4001.867180 Eb=-14.85

|      |           |           |           |
|------|-----------|-----------|-----------|
| Mg1  | -0.669577 | -1.069406 | 2.709740  |
| Mg2  | -0.144018 | 2.024718  | 2.778951  |
| Mg3  | -3.349823 | 1.974791  | -1.519234 |
| Mg4  | -0.144661 | -2.024490 | -2.778729 |
| Mg5  | 2.450161  | -0.358979 | -2.416765 |
| Mg6  | 1.955640  | 3.297671  | 1.182391  |
| Mg7  | 0.538597  | 0.000130  | -0.000202 |
| Mg8  | 3.819891  | -1.395547 | 0.177100  |
| Mg9  | 1.663875  | 2.706012  | -1.841431 |
| Mg10 | -0.672423 | 1.068235  | -2.708988 |
| Mg11 | -3.348332 | -1.976368 | 1.522164  |
| Mg12 | 1.667026  | -2.705662 | 1.839555  |
| Mg13 | -0.783071 | 3.007941  | -0.155842 |
| Mg14 | 1.956593  | -3.295589 | -1.183079 |
| Mg15 | -2.481740 | -0.956749 | -1.261044 |
| Mg16 | -2.481115 | 0.954519  | 1.263618  |
| Mg17 | 3.816765  | 1.397468  | -0.178939 |
| Mg18 | 2.451466  | 0.359778  | 2.415527  |
| Mg19 | -0.781235 | -3.008649 | 0.157264  |
| Mg20 | -5.464018 | 0.000177  | -0.002060 |

@mg20-isomer20 bp86/6-31G(d) Etot=-4001.866647 Eb=-14.83

|     |           |          |           |
|-----|-----------|----------|-----------|
| Mg1 | 1.813066  | 2.545163 | -1.184636 |
| Mg2 | 3.405848  | 0.620014 | 0.717932  |
| Mg3 | 1.685668  | 2.928470 | 1.914334  |
| Mg4 | -0.393137 | 4.056033 | -2.638924 |

|      |           |           |           |
|------|-----------|-----------|-----------|
| Mg5  | -0.893653 | 3.159819  | 0.263376  |
| Mg6  | 2.706459  | -0.211516 | -2.177614 |
| Mg7  | -1.618242 | 1.321626  | -2.201979 |
| Mg8  | -0.848998 | 1.751088  | 2.955943  |
| Mg9  | 0.355600  | 0.096344  | -0.032661 |
| Mg10 | 1.788077  | 0.139399  | 3.234525  |
| Mg11 | 4.539576  | -1.920725 | -0.373258 |
| Mg12 | -2.670923 | 0.627926  | 0.711570  |
| Mg13 | -0.166884 | -1.342109 | -2.846579 |
| Mg14 | 1.974982  | -3.136638 | -1.548919 |
| Mg15 | -2.972671 | -1.330869 | -1.715009 |
| Mg16 | -0.830644 | -1.363171 | 2.413119  |
| Mg17 | 1.975757  | -2.242517 | 1.389606  |
| Mg18 | -0.728686 | -2.953213 | -0.222881 |
| Mg19 | -3.393461 | -2.354438 | 1.116344  |
| Mg20 | -5.727734 | -0.390686 | 0.225711  |

@mg20-isomer21 bp86/6-31G(d) Etot=-4001.865117 Eb=-14.78

|      |           |           |           |
|------|-----------|-----------|-----------|
| Mg1  | -0.331820 | 0.065538  | 0.141119  |
| Mg2  | 0.493959  | 2.459889  | 2.348987  |
| Mg3  | -1.431695 | -1.934811 | 2.634749  |
| Mg4  | 2.607972  | -1.034316 | -0.508850 |
| Mg5  | -2.000283 | 1.006123  | 3.153253  |
| Mg6  | 3.062458  | 1.542284  | 1.203276  |
| Mg7  | 0.878424  | 0.635133  | -2.729803 |
| Mg8  | 0.305240  | -2.258668 | -2.102103 |
| Mg9  | 5.737739  | -0.022003 | 0.157665  |
| Mg10 | -4.343183 | 1.754990  | -1.306925 |
| Mg11 | -1.537906 | 2.525764  | -2.282228 |
| Mg12 | 0.860956  | -3.016922 | 1.029909  |
| Mg13 | 1.421572  | -0.556123 | 2.696282  |
| Mg14 | 0.977858  | 2.921151  | -0.661001 |
| Mg15 | -2.102592 | -2.768687 | -0.206779 |
| Mg16 | 3.545970  | 1.588697  | -1.790262 |
| Mg17 | -0.191854 | -4.968960 | -0.957273 |
| Mg18 | -2.344408 | -0.499021 | -2.256660 |
| Mg19 | -3.455251 | -0.194448 | 0.755475  |
| Mg20 | -2.153156 | 2.754389  | 0.681169  |

@mg20-isomer22 bp86/6-31G(d) Etot=-4001.861063 Eb=-14.66

|      |           |           |           |
|------|-----------|-----------|-----------|
| Mg1  | -2.344160 | 3.102684  | -0.866437 |
| Mg2  | -3.274032 | -1.247991 | 1.446266  |
| Mg3  | 1.892444  | -0.434955 | -1.436897 |
| Mg4  | -1.851227 | 0.624362  | -2.627363 |
| Mg5  | 3.529967  | 2.184765  | -1.924733 |
| Mg6  | -0.698337 | -0.056188 | 0.123459  |
| Mg7  | -2.585185 | 1.725752  | 1.954248  |
| Mg8  | 5.091075  | 0.408201  | 0.026196  |
| Mg9  | -0.614266 | -2.180825 | -2.303076 |
| Mg10 | -3.505843 | -1.772813 | -1.603295 |
| Mg11 | 0.304542  | 1.027103  | 2.936767  |
| Mg12 | 2.381752  | -0.966958 | 1.820500  |
| Mg13 | -0.500073 | -2.018178 | 2.481990  |
| Mg14 | -1.702214 | -3.542780 | 0.183822  |
| Mg15 | 2.367959  | 1.925181  | 0.864888  |
| Mg16 | -4.344361 | 0.856768  | -0.455510 |
| Mg17 | 0.496698  | 2.370895  | -1.555794 |
| Mg18 | 4.266084  | -2.383156 | -0.315610 |
| Mg19 | -0.184847 | 3.520270  | 1.271009  |
| Mg20 | 1.274023  | -3.142137 | -0.020429 |

@mg20-isomer23 bp86/6-31G(d) Etot=-4001.857508 Eb=-14.54

|     |           |           |           |
|-----|-----------|-----------|-----------|
| Mg1 | -0.241487 | -0.326188 | -0.215576 |
| Mg2 | 0.700753  | 1.802617  | -2.308586 |

|      |           |           |           |
|------|-----------|-----------|-----------|
| Mg3  | -2.317610 | 3.537255  | 1.636673  |
| Mg4  | 3.007160  | 0.056602  | -1.421557 |
| Mg5  | -1.772690 | 0.064114  | -3.173435 |
| Mg6  | 0.636309  | -0.297972 | 2.836868  |
| Mg7  | -1.863480 | -2.767628 | -2.085756 |
| Mg8  | -2.044714 | 2.243819  | -1.099207 |
| Mg9  | -4.708268 | 1.820440  | 0.592542  |
| Mg10 | 0.417966  | 2.409000  | 0.995387  |
| Mg11 | 5.772557  | 1.028163  | -0.187812 |
| Mg12 | -1.982819 | -2.420902 | 1.340175  |
| Mg13 | 2.962184  | 2.924258  | -0.613684 |
| Mg14 | 2.393511  | -1.931422 | 0.801906  |
| Mg15 | 3.071175  | 0.940302  | 1.708888  |
| Mg16 | 0.229242  | -3.855142 | -0.247552 |
| Mg17 | 0.515292  | -3.394286 | 2.730287  |
| Mg18 | -3.485823 | -0.555422 | -0.694188 |
| Mg19 | 0.965891  | -1.820259 | -2.570105 |
| Mg20 | -2.255148 | 0.542649  | 1.974732  |

@mg20-isomer24 bp86/6-31G(d) Etot=-4001.857468 Eb=-14.54

|      |           |           |           |
|------|-----------|-----------|-----------|
| Mg1  | -0.545381 | 0.201660  | -0.001787 |
| Mg2  | -2.221558 | 2.515371  | 1.796130  |
| Mg3  | 2.313922  | 2.315806  | 0.007190  |
| Mg4  | 0.314465  | -1.139207 | -2.930116 |
| Mg5  | 2.731844  | -0.105033 | -1.631113 |
| Mg6  | -2.638255 | -0.490471 | -2.415800 |
| Mg7  | 4.330819  | -2.270895 | -0.011797 |
| Mg8  | 1.269386  | -2.394851 | -0.008517 |
| Mg9  | 0.326599  | -1.162081 | 2.930228  |
| Mg10 | -3.720716 | -2.099877 | 0.001543  |
| Mg11 | -2.220881 | 2.516321  | -1.789889 |
| Mg12 | -1.354034 | -3.133563 | -1.513281 |
| Mg13 | 2.734393  | -0.116118 | 1.626900  |
| Mg14 | -0.223918 | 3.777272  | 0.006044  |
| Mg15 | 0.610948  | 1.979687  | -2.504741 |
| Mg16 | 0.605401  | 1.960213  | 2.512216  |
| Mg17 | -3.937769 | 0.780189  | 0.004182  |
| Mg18 | -1.350381 | -3.139541 | 1.502861  |
| Mg19 | 5.597158  | 0.497687  | 0.001905  |
| Mg20 | -2.622042 | -0.492569 | 2.417843  |

@mg20-isomer25 bp86/6-31G(d) Etot=-4001.855002 Eb=-14.47

|      |           |           |           |
|------|-----------|-----------|-----------|
| Mg1  | 0.341180  | 2.568260  | 1.797742  |
| Mg2  | 0.970983  | -2.703744 | 1.512613  |
| Mg3  | -1.089311 | -3.036828 | -0.928483 |
| Mg4  | 0.782548  | 1.848736  | -2.183883 |
| Mg5  | -2.152281 | 0.224650  | -2.382179 |
| Mg6  | -3.865476 | -1.785284 | -0.793190 |
| Mg7  | 5.223986  | 0.431414  | 0.699903  |
| Mg8  | 0.775578  | 4.347527  | -0.596423 |
| Mg9  | -2.074750 | -1.997783 | 1.731805  |
| Mg10 | -4.413284 | 1.220653  | -0.455818 |
| Mg11 | -1.813610 | 2.766757  | -0.497474 |
| Mg12 | 2.020435  | -3.256648 | -1.290290 |
| Mg13 | 3.963928  | -2.260650 | 0.966578  |
| Mg14 | -0.238449 | -0.072745 | 0.164066  |
| Mg15 | 3.054178  | 2.508552  | 0.297657  |
| Mg16 | -2.371897 | 1.154905  | 2.035111  |
| Mg17 | 0.581047  | -1.123274 | -2.817679 |
| Mg18 | 2.225920  | 0.055348  | 2.051442  |
| Mg19 | -4.817784 | -0.637731 | 1.851413  |
| Mg20 | 2.897058  | -0.252116 | -1.162910 |

@mg20-isomer26 bp86/6-31G(d) Etot=-4001.853966 Eb=-14.43

|      |           |           |           |
|------|-----------|-----------|-----------|
| Mg1  | 2.445500  | 0.490840  | -2.014929 |
| Mg2  | 5.352272  | 0.517636  | -0.589043 |
| Mg3  | -1.986378 | -1.773607 | -1.473470 |
| Mg4  | 0.052930  | 0.022902  | -0.070912 |
| Mg5  | 0.670205  | 2.979123  | -1.351894 |
| Mg6  | -4.186607 | -1.148780 | 0.678721  |
| Mg7  | 3.414394  | 2.771234  | -0.218177 |
| Mg8  | 0.541475  | -0.282897 | 2.959435  |
| Mg9  | 3.904382  | -2.046029 | -0.717773 |
| Mg10 | 1.068706  | -2.234980 | -1.871087 |
| Mg11 | -1.938960 | 1.362479  | -1.871934 |
| Mg12 | -1.729204 | 3.336956  | 0.441501  |
| Mg13 | 2.997382  | 0.110729  | 1.341052  |
| Mg14 | -0.510407 | -4.198242 | -0.234126 |
| Mg15 | 1.004707  | 2.559804  | 1.736379  |
| Mg16 | -2.179573 | 0.830108  | 2.153482  |
| Mg17 | -4.589861 | -0.200678 | -2.147087 |
| Mg18 | 1.565000  | -2.739800 | 1.355822  |
| Mg19 | -1.520888 | -2.190703 | 1.787889  |
| Mg20 | -4.375075 | 1.833905  | 0.106151  |

@mg20-isomer27 bp86/6-31G(d) Etot=-4001.849707 Eb=-14.30

|      |           |           |           |
|------|-----------|-----------|-----------|
| Mg1  | 0.183751  | -0.821012 | -0.002255 |
| Mg2  | 4.333647  | 2.094056  | -0.002338 |
| Mg3  | -0.876284 | 1.182119  | 1.838861  |
| Mg4  | -3.764951 | 0.529823  | 2.632894  |
| Mg5  | 0.892530  | -2.461994 | -2.493252 |
| Mg6  | -3.428784 | 2.095123  | -0.002103 |
| Mg7  | 2.436515  | 0.071186  | 1.708258  |
| Mg8  | 0.894953  | -2.454152 | 2.496435  |
| Mg9  | 1.740427  | 3.076013  | -1.517134 |
| Mg10 | -4.592482 | -0.744036 | 0.002169  |
| Mg11 | -0.868621 | 3.693211  | -0.002574 |
| Mg12 | -2.138802 | -1.913587 | -1.571259 |
| Mg13 | -0.132428 | -3.870737 | 0.004947  |
| Mg14 | -3.768896 | 0.521174  | -2.632226 |
| Mg15 | 2.438841  | 0.064532  | -1.711554 |
| Mg16 | -2.136693 | -1.908336 | 1.576973  |
| Mg17 | -0.880701 | 1.179840  | -1.841465 |
| Mg18 | 5.178255  | -0.769870 | 0.001146  |
| Mg19 | 1.741974  | 3.084279  | 1.512694  |
| Mg20 | 2.747748  | -2.647632 | 0.001784  |

@mg20-isomer28 bp86/6-31G(d) Etot=-4001.848398 Eb=-14.26

|      |           |           |           |
|------|-----------|-----------|-----------|
| Mg1  | 2.345567  | 1.752040  | 0.357273  |
| Mg2  | 4.303956  | 0.883202  | -2.107406 |
| Mg3  | 0.766437  | -3.172297 | 0.683673  |
| Mg4  | -1.804751 | 1.022694  | -2.128881 |
| Mg5  | -0.571606 | -2.144861 | -2.039921 |
| Mg6  | 4.779916  | -0.334822 | 0.548147  |
| Mg7  | -4.392638 | 0.977472  | -0.484583 |
| Mg8  | -2.188613 | -2.746842 | 0.615531  |
| Mg9  | 0.036241  | 1.589999  | 2.732982  |
| Mg10 | 0.466599  | 4.206770  | 1.383702  |
| Mg11 | 2.043290  | -0.698438 | 2.302577  |
| Mg12 | -4.999511 | -1.621480 | 0.833455  |
| Mg13 | 0.175391  | 3.360468  | -1.444489 |
| Mg14 | -2.033037 | 2.611873  | 0.666350  |
| Mg15 | -2.652397 | -0.017139 | 2.228226  |
| Mg16 | 1.241663  | 0.718569  | -2.435968 |
| Mg17 | 2.602508  | -1.688042 | -1.272268 |
| Mg18 | -0.219595 | -0.184548 | 0.256747  |
| Mg19 | -3.573959 | -1.524085 | -1.997730 |
| Mg20 | 3.674541  | -2.990533 | 1.302582  |

@mg20-isomer29 bp86/6-31G(d) Etot=-4001.848187 Eb=-14.25

|      |           |           |           |
|------|-----------|-----------|-----------|
| Mg1  | 2.883953  | -2.084260 | 0.639905  |
| Mg2  | -1.540957 | -1.687747 | -1.132706 |
| Mg3  | 3.306810  | 1.986771  | -1.767833 |
| Mg4  | 4.980653  | 0.264100  | 0.251964  |
| Mg5  | -3.773294 | -0.284803 | -2.859082 |
| Mg6  | -4.487000 | -1.159932 | -0.063244 |
| Mg7  | 0.712769  | -1.734986 | 2.746261  |
| Mg8  | -4.522954 | 1.816282  | -0.725064 |
| Mg9  | 1.098512  | -0.088424 | -1.070438 |
| Mg10 | 3.783437  | -1.204361 | -2.079701 |
| Mg11 | 0.040954  | -3.861406 | 0.767832  |
| Mg12 | -1.545200 | 1.434282  | -1.617495 |
| Mg13 | 3.785191  | 3.065409  | 0.931110  |
| Mg14 | 2.242552  | 0.725835  | 1.936175  |
| Mg15 | -2.257066 | -1.972583 | 1.889314  |
| Mg16 | -2.210814 | 3.267641  | 0.675252  |
| Mg17 | 0.869600  | 2.993908  | -0.072316 |
| Mg18 | -3.702500 | 0.928325  | 2.079853  |
| Mg19 | 1.138938  | -3.002194 | -1.836113 |
| Mg20 | -0.803583 | 0.598144  | 1.306328  |

@mg20-isomer30 bp86/6-31G(d) Etot=-4001.843548 Eb=-14.11

|      |           |           |           |
|------|-----------|-----------|-----------|
| Mg1  | 0.498404  | -1.519064 | 2.560456  |
| Mg2  | 2.211317  | 0.450055  | 1.043301  |
| Mg3  | 4.629426  | 2.445005  | 1.175543  |
| Mg4  | -0.070118 | -1.028354 | -0.473580 |
| Mg5  | 0.606241  | -3.540109 | -1.873021 |
| Mg6  | -2.547522 | -2.705363 | -1.180377 |
| Mg7  | -0.665033 | 1.248591  | 1.518675  |
| Mg8  | -2.462422 | -1.508860 | 1.604563  |
| Mg9  | -1.669449 | 3.457815  | -0.311169 |
| Mg10 | 0.529404  | 1.663958  | -1.710092 |
| Mg11 | -4.842300 | -0.799204 | -0.194507 |
| Mg12 | -2.379268 | 0.604200  | -1.359107 |
| Mg13 | 1.448479  | 3.457017  | 0.517959  |
| Mg14 | 4.859717  | -0.589765 | 0.005121  |
| Mg15 | 2.486453  | -0.956440 | -1.990784 |
| Mg16 | -3.703285 | 1.475940  | 1.546670  |
| Mg17 | -4.779113 | 2.550084  | -0.932227 |
| Mg18 | 2.664684  | -2.772550 | 0.533413  |
| Mg19 | 3.583581  | 1.934665  | -1.487550 |
| Mg20 | -0.399197 | -3.867620 | 1.006714  |

@mg20-isomer31 bp86/6-31G(d) Etot=-4001.843275 Eb=-14.10

|      |           |           |           |
|------|-----------|-----------|-----------|
| Mg1  | 3.559478  | 0.803755  | -0.732847 |
| Mg2  | -2.055344 | 0.277618  | -0.470031 |
| Mg3  | -2.009745 | 2.759443  | 1.483381  |
| Mg4  | -1.743921 | -2.086630 | -2.540893 |
| Mg5  | 0.865613  | 1.869405  | 0.525740  |
| Mg6  | 1.012302  | -0.799395 | -1.691128 |
| Mg7  | -0.455804 | 3.465794  | -4.203326 |
| Mg8  | -1.304015 | 3.223102  | -1.328057 |
| Mg9  | 1.672191  | 2.178317  | -2.512323 |
| Mg10 | -1.162024 | 0.633561  | -3.478704 |
| Mg11 | 2.891416  | -2.318224 | 0.343282  |
| Mg12 | -2.553941 | -2.619283 | 0.685898  |
| Mg13 | -2.677498 | -0.362763 | 2.559571  |
| Mg14 | -2.225930 | -4.806885 | -1.351889 |
| Mg15 | 0.177412  | -1.348393 | 1.635211  |
| Mg16 | 0.422078  | -3.664058 | -0.498763 |
| Mg17 | 5.283746  | -0.713937 | 1.208538  |
| Mg18 | 0.156477  | 1.181959  | 3.525800  |



|      |           |          |          |
|------|-----------|----------|----------|
| Mg19 | 2.749518  | 0.271548 | 2.493851 |
| Mg20 | -2.602007 | 2.055065 | 4.346688 |

@mg20-isomer32 bp86/6-31G(d) Etot=-4001.842833 Eb=-14.08

|      |           |           |           |
|------|-----------|-----------|-----------|
| Mg1  | -1.834550 | 1.187857  | 1.402033  |
| Mg2  | -2.330544 | 0.676957  | -2.427756 |
| Mg3  | -2.606114 | 3.228298  | -0.602238 |
| Mg4  | 0.958116  | -3.241199 | -2.071683 |
| Mg5  | -0.545394 | -0.919863 | -0.627470 |
| Mg6  | -0.258150 | 3.791587  | 1.361838  |
| Mg7  | 1.113270  | -0.315650 | -3.049577 |
| Mg8  | 3.003722  | -1.230901 | -0.867440 |
| Mg9  | 4.861665  | 0.911643  | 0.602758  |
| Mg10 | -4.239935 | -0.542330 | 2.133338  |
| Mg11 | -4.650759 | 1.001277  | -0.443345 |
| Mg12 | 0.202772  | 2.139190  | -1.100280 |
| Mg13 | 4.018658  | -1.529692 | 1.973967  |
| Mg14 | -3.489088 | -1.799503 | -0.516760 |
| Mg15 | 1.253321  | 0.248667  | 1.590672  |
| Mg16 | -1.375031 | -1.708981 | 2.139733  |
| Mg17 | -1.202023 | -3.872797 | -0.021056 |
| Mg18 | 1.337814  | -2.870839 | 1.284857  |
| Mg19 | 2.625200  | 3.035741  | 0.961812  |
| Mg20 | 3.157051  | 1.810537  | -1.723404 |

@mg20-isomer33 bp86/6-31G(d) Etot=-4001.841127 Eb=-14.03

|      |           |           |           |
|------|-----------|-----------|-----------|
| Mg1  | -0.873698 | -2.007116 | -2.010640 |
| Mg2  | 2.130242  | -2.085457 | -1.844484 |
| Mg3  | 3.359548  | 0.706130  | -2.292102 |
| Mg4  | -3.869842 | -1.784490 | -2.445757 |
| Mg5  | 0.410692  | -2.074790 | 1.003205  |
| Mg6  | 0.640272  | 0.434770  | -0.887912 |
| Mg7  | 3.045328  | -3.589380 | 0.591184  |
| Mg8  | -2.772576 | -1.590823 | 0.351098  |
| Mg9  | -2.415823 | 0.760500  | -1.803183 |
| Mg10 | 4.653991  | -1.168898 | -0.292506 |
| Mg11 | 2.232131  | 3.493325  | -1.473041 |
| Mg12 | -0.762110 | 3.304501  | -1.281850 |
| Mg13 | -4.637070 | 0.399931  | 2.125158  |
| Mg14 | -5.636230 | -0.246249 | -0.584318 |
| Mg15 | 3.299963  | 1.436965  | 0.777411  |
| Mg16 | -1.839425 | -0.780624 | 2.993050  |
| Mg17 | 0.843558  | 0.681538  | 2.311697  |
| Mg18 | -1.863910 | 1.675009  | 1.121720  |
| Mg19 | 3.187669  | -1.195126 | 2.386680  |
| Mg20 | 0.867292  | 3.630285  | 1.254589  |

@mg20-isomer34 bp86/6-31G(d) Etot=-4001.840705 Eb=-14.02

|      |           |           |           |
|------|-----------|-----------|-----------|
| Mg1  | -1.110844 | -0.714683 | 2.088135  |
| Mg2  | 2.707418  | -0.680611 | -2.590011 |
| Mg3  | 1.039349  | -0.670746 | -0.156826 |
| Mg4  | -1.302144 | 1.674939  | -0.049612 |
| Mg5  | 1.362189  | 1.462370  | 1.951724  |
| Mg6  | -3.343524 | 1.197547  | -2.314461 |
| Mg7  | 2.149123  | -1.712323 | 2.301184  |
| Mg8  | 4.130794  | -1.809743 | -0.068309 |
| Mg9  | 4.648255  | 1.078222  | -1.013310 |
| Mg10 | -4.226553 | 2.980096  | -0.078142 |
| Mg11 | 1.740629  | 2.073629  | -1.256055 |
| Mg12 | -3.630927 | 0.940065  | 2.155418  |
| Mg13 | -2.248061 | -1.367939 | -0.836097 |
| Mg14 | -3.925878 | -2.077423 | 1.620841  |
| Mg15 | 0.277183  | -2.869497 | -2.259940 |
| Mg16 | 4.287175  | 0.455210  | 1.959556  |

|      |           |           |           |
|------|-----------|-----------|-----------|
| Mg17 | -5.255444 | 0.068676  | -0.240581 |
| Mg18 | -0.485420 | 0.183245  | -2.713038 |
| Mg19 | -0.338539 | -3.439373 | 0.620182  |
| Mg20 | 3.525217  | 3.228338  | 0.879339  |

@mg20-isomer35 bp86/6-31G(d) Etot=-4001.838549 Eb=-13.95

|      |           |           |           |
|------|-----------|-----------|-----------|
| Mg1  | -1.006777 | 1.320575  | -1.393357 |
| Mg2  | -2.191176 | -1.517751 | -1.492896 |
| Mg3  | -0.893991 | -0.841685 | 1.294217  |
| Mg4  | 2.123142  | -1.261238 | 1.289424  |
| Mg5  | 2.956950  | -3.544476 | -0.657530 |
| Mg6  | 5.110985  | -1.967503 | 0.711771  |
| Mg7  | -4.038949 | 1.006998  | -0.813146 |
| Mg8  | -5.120012 | -1.943369 | -0.592304 |
| Mg9  | 3.895791  | -0.716102 | -1.650621 |
| Mg10 | 2.066582  | 1.766867  | -1.408118 |
| Mg11 | -2.927543 | -3.412105 | 0.867463  |
| Mg12 | -2.157608 | 1.975291  | 1.490067  |
| Mg13 | 0.836957  | -1.109947 | -1.570662 |
| Mg14 | 0.995977  | 1.541512  | 1.542042  |
| Mg15 | 4.135410  | 1.099874  | 0.778130  |
| Mg16 | -3.921905 | -0.575231 | 1.777952  |
| Mg17 | 3.023183  | 3.912347  | 0.616332  |
| Mg18 | -2.931812 | 3.850372  | -0.852704 |
| Mg19 | 0.027072  | 3.956390  | -0.067404 |
| Mg20 | 0.017725  | -3.540819 | 0.131345  |

@mg20-isomer36 bp86/6-31G(d) Etot=-4001.837671 Eb=-13.92

|      |           |           |           |
|------|-----------|-----------|-----------|
| Mg1  | 0.516098  | -2.064055 | -0.753361 |
| Mg2  | 2.281835  | 0.497068  | -0.134345 |
| Mg3  | 1.931965  | -1.560341 | 2.086847  |
| Mg4  | -1.256320 | -1.831261 | 1.975269  |
| Mg5  | 0.208090  | 0.996990  | 1.962769  |
| Mg6  | 3.602905  | -2.622680 | -0.399029 |
| Mg7  | -2.894614 | 0.912188  | 2.508916  |
| Mg8  | -1.842385 | -0.138538 | -0.368100 |
| Mg9  | -1.664451 | 2.926191  | 0.193395  |
| Mg10 | -2.636811 | -3.095834 | -0.582932 |
| Mg11 | 4.797004  | -0.571647 | 1.653007  |
| Mg12 | -4.585430 | -0.998180 | -1.714763 |
| Mg13 | 0.194984  | 1.231178  | -2.101052 |
| Mg14 | -3.006175 | 1.524961  | -2.475945 |
| Mg15 | -4.377467 | -1.412415 | 1.328195  |
| Mg16 | 2.495203  | -0.866660 | -2.826594 |
| Mg17 | -4.630973 | 1.475565  | 0.127127  |
| Mg18 | 1.301621  | 3.340185  | 0.245198  |
| Mg19 | 5.120516  | -0.115868 | -1.368698 |
| Mg20 | 4.444405  | 2.373153  | 0.644096  |

@mg20-isomer37 bp86/6-31G(d) Etot=-4001.834153 Eb=-13.81

|      |           |           |           |
|------|-----------|-----------|-----------|
| Mg1  | 0.189791  | -2.450752 | 1.225734  |
| Mg2  | -2.003852 | -1.994037 | -0.830776 |
| Mg3  | -2.337815 | 1.273697  | 0.058477  |
| Mg4  | 0.856453  | -2.634488 | -1.749249 |
| Mg5  | -0.695842 | 0.309348  | -2.320562 |
| Mg6  | 1.553566  | -0.111974 | -0.343118 |
| Mg7  | -3.669515 | -0.032221 | -2.548415 |
| Mg8  | 4.767740  | -0.425031 | 0.531577  |
| Mg9  | 0.274002  | 2.695852  | -0.480384 |
| Mg10 | -5.501289 | 1.542173  | -0.682783 |
| Mg11 | -5.021714 | -1.322065 | 0.030324  |
| Mg12 | 3.693243  | 1.774897  | -1.400304 |
| Mg13 | 3.223337  | -3.082809 | 0.350268  |
| Mg14 | 2.600431  | 4.514149  | -0.119002 |

|      |           |           |           |
|------|-----------|-----------|-----------|
| Mg15 | 2.972796  | 1.889271  | 1.528046  |
| Mg16 | 2.636941  | -1.009472 | 2.568107  |
| Mg17 | -2.467639 | -1.185404 | 2.090491  |
| Mg18 | 3.756912  | -1.320638 | -2.143153 |
| Mg19 | -4.712657 | 0.867315  | 2.168021  |
| Mg20 | -0.114889 | 0.702188  | 2.066700  |

@mg20-isomer38 bp86/6-31G(d) Etot=-4001.833754 Eb=-13.80

|      |           |           |           |
|------|-----------|-----------|-----------|
| Mg1  | -4.404177 | 0.104485  | -2.630736 |
| Mg2  | -4.996660 | -1.238299 | -0.000988 |
| Mg3  | -1.762108 | 1.269190  | -1.572228 |
| Mg4  | 3.154646  | 0.551307  | -1.829366 |
| Mg5  | 5.147243  | 1.879623  | 0.001584  |
| Mg6  | 2.884593  | -2.499779 | 1.526134  |
| Mg7  | 2.444802  | 3.339473  | 0.001490  |
| Mg8  | -2.316026 | -1.812176 | 1.522384  |
| Mg9  | -4.396412 | 1.711524  | 0.000589  |
| Mg10 | 0.519316  | -0.793196 | -2.575514 |
| Mg11 | -2.315174 | -1.809289 | -1.523213 |
| Mg12 | -1.761633 | 1.266248  | 1.572576  |
| Mg13 | 2.884829  | -2.497396 | -1.527453 |
| Mg14 | -0.463447 | 3.773350  | 0.002699  |
| Mg15 | 0.222781  | -2.562179 | -0.001038 |
| Mg16 | 5.086393  | -1.165329 | 0.000496  |
| Mg17 | 0.518093  | -0.796101 | 2.573501  |
| Mg18 | 0.806879  | 0.626545  | -0.001228 |
| Mg19 | -4.405983 | 0.102381  | 2.630435  |
| Mg20 | 3.152044  | 0.549617  | 1.829874  |

@mg20-isomer39 bp86/6-31G(d) Etot=-4001.830347 Eb=-13.69

|      |           |           |           |
|------|-----------|-----------|-----------|
| Mg1  | 2.178483  | -1.397969 | 1.790198  |
| Mg2  | 0.521191  | -0.338296 | -0.931921 |
| Mg3  | -0.589175 | 2.371362  | -0.133655 |
| Mg4  | -2.005306 | 0.796223  | -2.578978 |
| Mg5  | 2.227041  | 1.684389  | -2.248009 |
| Mg6  | -2.380343 | -0.057052 | 0.576010  |
| Mg7  | 4.920962  | 0.034456  | 1.870284  |
| Mg8  | -1.965237 | -2.135049 | -1.569435 |
| Mg9  | -0.730048 | -2.384092 | 1.319459  |
| Mg10 | 4.995972  | 1.802300  | -0.747986 |
| Mg11 | -5.508202 | 0.373882  | 1.051506  |
| Mg12 | -0.018552 | 0.620608  | 2.451333  |
| Mg13 | -4.227364 | -2.399079 | 0.622031  |
| Mg14 | 3.663084  | -0.926022 | -0.979615 |
| Mg15 | -4.713161 | -0.479033 | -1.753551 |
| Mg16 | 2.321133  | 1.571552  | 0.880475  |
| Mg17 | -3.121679 | 2.121875  | 2.303572  |
| Mg18 | 6.835036  | -0.499689 | -0.375288 |
| Mg19 | -3.820592 | 2.338861  | -0.729206 |
| Mg20 | 1.416757  | -3.099228 | -0.817223 |

@mg20-isomer40 bp86/6-31G(d) Etot=-4001.830270 Eb=-13.69

|      |           |           |           |
|------|-----------|-----------|-----------|
| Mg1  | -2.606886 | -2.563205 | 0.785768  |
| Mg2  | -0.413354 | -0.523088 | -0.280639 |
| Mg3  | 0.243136  | -2.672694 | 2.011372  |
| Mg4  | 4.182522  | 0.749760  | 0.410524  |
| Mg5  | -1.195064 | 2.522481  | 0.607480  |
| Mg6  | 5.411152  | -1.979974 | 0.154872  |
| Mg7  | 1.809430  | 1.167007  | -1.435836 |
| Mg8  | -3.461493 | 0.275066  | -0.273254 |
| Mg9  | 1.889041  | 3.019300  | 1.020865  |
| Mg10 | 0.406105  | 3.892268  | -1.571747 |
| Mg11 | -0.003004 | 2.555524  | 3.367328  |
| Mg12 | 2.367782  | -2.033155 | -0.229630 |

|      |           |           |           |
|------|-----------|-----------|-----------|
| Mg13 | 1.531278  | 0.155177  | 1.985726  |
| Mg14 | -2.299070 | -1.699049 | -2.393374 |
| Mg15 | -1.267932 | 1.512673  | -2.377909 |
| Mg16 | -1.648657 | -0.045715 | 2.490877  |
| Mg17 | 4.266699  | -0.757407 | -2.329892 |
| Mg18 | -4.762419 | -0.789298 | 2.266430  |
| Mg19 | -0.317332 | -3.569595 | -0.937986 |
| Mg20 | -4.131935 | 0.783923  | -3.270974 |

@mg20-isomer41 bp86/6-31G(d) Etot=-4001.828515 Eb=-13.64

|      |           |           |           |
|------|-----------|-----------|-----------|
| Mg1  | 0.041456  | -1.715824 | 1.441339  |
| Mg2  | 5.022353  | 1.513751  | -0.128000 |
| Mg3  | 3.044860  | 0.373433  | -2.434203 |
| Mg4  | -2.732189 | 0.443151  | -2.580190 |
| Mg5  | 3.296370  | 2.962757  | 1.906913  |
| Mg6  | -1.656611 | -2.008149 | -1.067337 |
| Mg7  | -4.609080 | 0.750256  | 1.635853  |
| Mg8  | 0.262970  | 2.898295  | 1.153634  |
| Mg9  | 4.674724  | -1.465276 | -0.617012 |
| Mg10 | -2.485690 | 2.388309  | -0.169126 |
| Mg11 | 2.923238  | -2.881523 | 1.316826  |
| Mg12 | 2.354970  | 2.935842  | -0.928470 |
| Mg13 | 0.523812  | -4.431390 | 0.126452  |
| Mg14 | -3.043865 | -1.890721 | 1.787595  |
| Mg15 | 1.543189  | -1.978507 | -1.335942 |
| Mg16 | -1.618061 | 0.733000  | 2.113421  |
| Mg17 | 2.332088  | 0.209106  | 0.913515  |
| Mg18 | -0.031890 | 0.719997  | -1.220332 |
| Mg19 | -5.281700 | 1.658882  | -1.223421 |
| Mg20 | -4.560944 | -1.215389 | -0.691514 |

@mg20-isomer42 bp86/6-31G(d) Etot=-4001.827175 Eb=-13.59

|      |           |           |           |
|------|-----------|-----------|-----------|
| Mg1  | -1.297822 | 0.189985  | 0.212930  |
| Mg2  | 1.678771  | 0.138488  | 0.942518  |
| Mg3  | -2.615602 | -2.294240 | -1.633005 |
| Mg4  | 2.529682  | -2.137878 | 2.710922  |
| Mg5  | -4.302019 | 0.344108  | -0.924229 |
| Mg6  | 4.859488  | -1.119118 | 0.922903  |
| Mg7  | -2.249540 | 2.845127  | -0.914467 |
| Mg8  | 0.359619  | -1.410993 | -2.026153 |
| Mg9  | 0.198997  | 2.905846  | 1.008309  |
| Mg10 | 3.176498  | -0.034098 | -1.888950 |
| Mg11 | -0.267129 | -2.523105 | 1.072009  |
| Mg12 | 5.772342  | 1.373976  | -0.365390 |
| Mg13 | -2.648352 | -4.411526 | 0.570473  |
| Mg14 | -3.598461 | 1.439628  | 1.895313  |
| Mg15 | -2.326143 | 4.164195  | 2.126941  |
| Mg16 | -2.029052 | 0.436811  | -2.930902 |
| Mg17 | 0.589083  | 1.709789  | -1.748612 |
| Mg18 | -3.500215 | -1.615194 | 1.337951  |
| Mg19 | 2.538618  | -2.679086 | -0.286245 |
| Mg20 | 3.131233  | 2.677283  | -0.082316 |

@mg20-isomer43 bp86/6-31G(d) Etot=-4001.817073 Eb=-13.28

|      |           |           |           |
|------|-----------|-----------|-----------|
| Mg1  | 1.307872  | 0.551760  | 0.333445  |
| Mg2  | -0.459434 | 0.569770  | -2.107594 |
| Mg3  | -1.592155 | 1.829012  | 0.960367  |
| Mg4  | 3.178863  | 0.705558  | 2.682687  |
| Mg5  | -1.350538 | -2.411360 | -2.433115 |
| Mg6  | 0.634382  | 3.340305  | -0.695766 |
| Mg7  | 0.052335  | -0.073953 | 2.935941  |
| Mg8  | -0.857289 | -1.850176 | 0.467323  |
| Mg9  | 2.277095  | -2.065657 | 1.584172  |
| Mg10 | -3.232432 | -0.254941 | -0.863773 |

|      |           |           |           |
|------|-----------|-----------|-----------|
| Mg11 | 2.688300  | 1.058387  | -2.291024 |
| Mg12 | -5.401098 | -1.775413 | 1.156711  |
| Mg13 | -3.618074 | -3.337018 | -0.677239 |
| Mg14 | -3.030325 | -0.386859 | 2.382948  |
| Mg15 | -2.657761 | 2.767371  | -1.718471 |
| Mg16 | 4.289904  | -0.530769 | -0.359389 |
| Mg17 | 1.741765  | -1.899641 | -1.548416 |
| Mg18 | 4.204641  | -3.639611 | -0.287435 |
| Mg19 | -1.939845 | 4.938884  | 0.200658  |
| Mg20 | 3.763796  | 2.464351  | 0.277971  |

@mg20-isomer44 bp86/6-31G(d) Etot=-4001.816294 Eb=-13.25

|      |           |           |           |
|------|-----------|-----------|-----------|
| Mg1  | -1.995090 | 1.353288  | -1.486124 |
| Mg2  | 0.047882  | 0.661395  | 0.964046  |
| Mg3  | 1.047965  | -2.275885 | 1.083932  |
| Mg4  | 2.165018  | 3.061114  | 0.839625  |
| Mg5  | -4.991703 | 1.629510  | -0.542709 |
| Mg6  | -2.695765 | 1.647235  | 1.560254  |
| Mg7  | -0.666109 | 3.752128  | 0.062699  |
| Mg8  | 1.092280  | 1.526532  | -1.859630 |
| Mg9  | -0.472918 | -1.203784 | -1.674770 |
| Mg10 | 4.042878  | 1.600106  | -0.964386 |
| Mg11 | -3.458735 | -1.373573 | -1.042013 |
| Mg12 | 5.921798  | 0.216973  | 1.173058  |
| Mg13 | -4.999366 | -0.440041 | 1.670896  |
| Mg14 | -1.495769 | -3.686869 | -0.202290 |
| Mg15 | 2.491009  | -1.172156 | -1.480775 |
| Mg16 | -1.970745 | -1.408381 | 1.722777  |
| Mg17 | -6.610329 | -0.831048 | -0.845483 |
| Mg18 | 2.836652  | 0.256069  | 1.733549  |
| Mg19 | 4.100895  | -2.353798 | 0.803229  |
| Mg20 | 5.610150  | -0.958816 | -1.515883 |

@mg20-isomer45 bp86/6-31G(d) Etot=-4001.816188 Eb=-13.25

|      |           |           |           |
|------|-----------|-----------|-----------|
| Mg1  | -0.280708 | 0.047702  | 0.300651  |
| Mg2  | -2.385477 | -1.089589 | -1.741946 |
| Mg3  | 2.593940  | -0.447398 | -1.013651 |
| Mg4  | -4.770250 | -1.788042 | 0.065918  |
| Mg5  | -0.734822 | 2.701951  | 1.688272  |
| Mg6  | 3.439797  | -3.353373 | -0.388506 |
| Mg7  | 2.108135  | 0.893273  | 1.995124  |
| Mg8  | -1.920839 | -2.419140 | 0.950961  |
| Mg9  | 4.626071  | 1.447420  | 0.385714  |
| Mg10 | -1.632297 | 2.168202  | -1.494578 |
| Mg11 | 1.555914  | 2.493495  | -0.683965 |
| Mg12 | 1.354327  | -2.222090 | 1.581307  |
| Mg13 | 0.213418  | 0.175260  | -2.767306 |
| Mg14 | 5.662601  | -1.209261 | -0.820830 |
| Mg15 | -3.196733 | 3.977799  | 0.473346  |
| Mg16 | 4.326043  | -1.290519 | 1.818918  |
| Mg17 | -7.582734 | -3.133843 | 0.606416  |
| Mg18 | -0.396122 | 4.876741  | -0.386926 |
| Mg19 | 0.358896  | -2.655306 | -1.298664 |
| Mg20 | -3.339161 | 0.826718  | 0.729747  |

@mg20-isomer46 bp86/6-31G(d) Etot=-4001.807850 Eb=-12.99

|     |           |           |           |
|-----|-----------|-----------|-----------|
| Mg1 | -0.084941 | 0.497370  | 1.086698  |
| Mg2 | 0.510722  | -1.566533 | 3.229061  |
| Mg3 | -3.022798 | -0.874361 | -0.270732 |
| Mg4 | -1.143549 | -2.772205 | 0.923793  |
| Mg5 | -1.186602 | 1.889053  | -1.354342 |
| Mg6 | -2.549045 | -0.652679 | 2.758051  |
| Mg7 | 1.769001  | -2.211120 | 0.469035  |
| Mg8 | 1.990594  | 0.892180  | -1.086484 |

|      |           |           |           |
|------|-----------|-----------|-----------|
| Mg9  | -0.313115 | -1.179039 | -1.765880 |
| Mg10 | 4.641645  | -0.800541 | -0.478313 |
| Mg11 | -4.250625 | 2.289557  | -0.981187 |
| Mg12 | -3.100358 | 0.262615  | -3.059776 |
| Mg13 | 2.877946  | 0.237994  | 1.970432  |
| Mg14 | 4.442538  | 2.146950  | 0.256295  |
| Mg15 | -5.119120 | 0.667540  | 1.521439  |
| Mg16 | 6.079779  | 4.841663  | 0.043891  |
| Mg17 | -2.523503 | 2.308030  | 1.486355  |
| Mg18 | 4.074567  | -3.824707 | -0.747391 |
| Mg19 | -5.782846 | -0.305634 | -1.382982 |
| Mg20 | 2.689711  | -1.846131 | -2.617962 |

@mg20-isomer47 bp86/6-31G(d) Etot=-4001.798590 Eb=-12.70

|      |           |           |           |
|------|-----------|-----------|-----------|
| Mg1  | -1.974705 | 1.160667  | 1.213794  |
| Mg2  | 0.234960  | 1.941835  | -1.304038 |
| Mg3  | -1.800254 | -2.139047 | 1.534939  |
| Mg4  | 0.832084  | -0.447227 | 1.149818  |
| Mg5  | -2.645395 | -3.544292 | -1.035169 |
| Mg6  | 3.022161  | 1.563599  | -0.162957 |
| Mg7  | 0.831412  | -3.026075 | 2.789395  |
| Mg8  | -1.151204 | -0.928127 | -1.250069 |
| Mg9  | -1.225206 | 4.414124  | -0.042201 |
| Mg10 | -5.101454 | 1.770248  | 0.588911  |
| Mg11 | 1.822082  | -0.914763 | -1.762154 |
| Mg12 | 2.198724  | -3.218995 | 0.103265  |
| Mg13 | 0.734163  | 2.704064  | 1.596030  |
| Mg14 | -4.082532 | -0.858932 | -0.231750 |
| Mg15 | -2.945273 | 1.938771  | -1.544181 |
| Mg16 | -0.404175 | -4.783577 | 0.593512  |
| Mg17 | -4.125077 | 4.537217  | 0.091200  |
| Mg18 | 6.125635  | 1.699871  | -0.076868 |
| Mg19 | 9.447927  | 1.716154  | -0.072808 |
| Mg20 | 0.206127  | -3.585515 | -2.178669 |

@mg20-isomer48 bp86/6-31G(d) Etot=-4001.783450 Eb=-12.22

|      |           |           |           |
|------|-----------|-----------|-----------|
| Mg1  | -0.392885 | 0.736069  | -1.041952 |
| Mg2  | 2.183223  | 1.748577  | 0.359967  |
| Mg3  | 2.158805  | -1.258056 | -0.931606 |
| Mg4  | 0.519980  | -0.604248 | 1.659247  |
| Mg5  | 3.640920  | -0.693821 | 1.667251  |
| Mg6  | -2.462027 | -0.402552 | 1.026566  |
| Mg7  | -3.754790 | -2.845689 | -0.391279 |
| Mg8  | -5.268810 | 0.055315  | -0.495376 |
| Mg9  | -0.957151 | 2.208141  | 1.546335  |
| Mg10 | 5.081232  | 0.779050  | -0.580883 |
| Mg11 | 0.351319  | 3.938939  | -0.642077 |
| Mg12 | 7.795429  | -0.697972 | -1.295691 |
| Mg13 | -6.854620 | -2.663437 | -0.180166 |
| Mg14 | 6.897675  | -0.800160 | 1.536781  |
| Mg15 | -3.132885 | 2.251204  | -0.932580 |
| Mg16 | 5.287409  | -2.292786 | -0.610971 |
| Mg17 | -0.730024 | -2.394861 | -0.715286 |
| Mg18 | -5.155977 | -1.546527 | 2.153089  |
| Mg19 | -2.373426 | 4.941482  | 0.222669  |
| Mg20 | -2.833397 | -0.458667 | -2.354039 |

@mg20-isomer49 bp86/6-31G(d) Etot=-4001.749968 Eb=-11.17

|     |           |           |           |
|-----|-----------|-----------|-----------|
| Mg1 | -3.174221 | 0.349478  | 0.667590  |
| Mg2 | -5.674209 | 2.134658  | -0.009544 |
| Mg3 | -0.621599 | -1.407913 | 0.706040  |
| Mg4 | -5.810162 | -0.721201 | 1.735020  |
| Mg5 | -0.802711 | 1.543564  | 2.164429  |
| Mg6 | -5.197075 | -0.625043 | -1.571822 |

|      |           |           |           |
|------|-----------|-----------|-----------|
| Mg7  | -3.594254 | -2.689240 | 0.359234  |
| Mg8  | 1.842301  | 0.474227  | 1.148636  |
| Mg9  | -2.159342 | -1.094507 | -1.993870 |
| Mg10 | -0.496726 | 1.323312  | -0.898885 |
| Mg11 | 4.808474  | 0.071873  | 1.018695  |
| Mg12 | 7.556225  | 1.300242  | -0.242049 |
| Mg13 | 7.531530  | -0.455892 | 2.417353  |
| Mg14 | -6.629873 | -3.055416 | -0.043443 |
| Mg15 | 9.046238  | -0.139207 | -2.876771 |
| Mg16 | 7.131619  | -1.583764 | -0.536266 |
| Mg17 | 10.109233 | -0.568500 | 0.067825  |
| Mg18 | -3.312037 | 1.762836  | -2.210579 |
| Mg19 | -2.625506 | 3.365921  | 0.308120  |
| Mg20 | -7.927904 | 0.014572  | -0.209714 |

@mg21-isomer01 bp86/6-31G(d) Etot=-4201.993305 Eb=-15.83

|      |           |           |           |
|------|-----------|-----------|-----------|
| Mg1  | 1.730810  | -2.719828 | 0.457744  |
| Mg2  | 4.514103  | -1.911424 | -0.849535 |
| Mg3  | 2.850347  | 0.475722  | -1.797853 |
| Mg4  | -0.786286 | -2.605670 | -1.378611 |
| Mg5  | -0.000744 | -0.072586 | -3.028442 |
| Mg6  | 1.997999  | -2.365062 | -2.556811 |
| Mg7  | 3.240531  | -0.136370 | 1.230455  |
| Mg8  | 1.990341  | 2.564617  | 0.372522  |
| Mg9  | -2.919320 | -0.524688 | -2.172100 |
| Mg10 | -5.722907 | -0.156563 | -0.248936 |
| Mg11 | 1.047699  | 2.759848  | -2.603852 |
| Mg12 | -1.097178 | -2.311915 | 1.708889  |
| Mg13 | 0.287041  | 0.003196  | 0.129135  |
| Mg14 | -2.707326 | 0.233589  | 0.940175  |
| Mg15 | -1.105258 | 0.128165  | 3.565969  |
| Mg16 | 1.524139  | 1.506109  | 3.240059  |
| Mg17 | -1.690116 | 2.076261  | -1.364381 |
| Mg18 | -0.148645 | 4.556752  | -0.523846 |
| Mg19 | -0.850677 | 2.556605  | 1.657958  |
| Mg20 | 1.412293  | -1.504845 | 3.278933  |
| Mg21 | -3.566847 | -2.551913 | -0.057472 |

@mg21-isomer02 bp86/6-31G(d) Etot=-4201.988802 Eb=-15.69

|      |           |           |           |
|------|-----------|-----------|-----------|
| Mg1  | -5.039308 | 0.457066  | -0.000021 |
| Mg2  | -2.403090 | 2.626748  | -0.000109 |
| Mg3  | 0.002182  | 2.280191  | 1.928628  |
| Mg4  | -0.000012 | -0.136803 | 3.711616  |
| Mg5  | -2.475556 | 0.419823  | -2.047581 |
| Mg6  | 2.806465  | -1.830794 | 0.000073  |
| Mg7  | 0.004380  | 4.586680  | -0.000146 |
| Mg8  | 0.000023  | -0.137095 | -3.711615 |
| Mg9  | -1.515856 | -2.447592 | 2.644080  |
| Mg10 | 1.513180  | -2.450152 | 2.645197  |
| Mg11 | -2.809813 | -1.825798 | 0.000053  |
| Mg12 | -0.000877 | -0.115639 | -0.000012 |
| Mg13 | -0.001989 | -3.137352 | 0.000106  |
| Mg14 | 0.002219  | 2.280052  | -1.928772 |
| Mg15 | -2.475573 | 0.419960  | 2.047487  |
| Mg16 | 2.474633  | 0.415649  | -2.045943 |
| Mg17 | 5.038232  | 0.452841  | -0.000047 |
| Mg18 | 2.408751  | 2.624618  | -0.000007 |
| Mg19 | -1.515803 | -2.447764 | -2.643928 |
| Mg20 | 1.513204  | -2.450349 | -2.645020 |
| Mg21 | 2.474608  | 0.415709  | 2.045963  |

@mg21-isomer03 bp86/6-31G(d) Etot=-4201.987752 Eb=-15.66

|     |           |           |           |
|-----|-----------|-----------|-----------|
| Mg1 | 0.333704  | -2.584803 | -2.618813 |
| Mg2 | -0.718930 | 0.002743  | -3.685996 |

|      |           |           |           |
|------|-----------|-----------|-----------|
| Mg3  | -2.654190 | -1.969897 | 2.693559  |
| Mg4  | 1.931338  | -0.080317 | -2.143524 |
| Mg5  | 0.320962  | -2.571173 | 2.632234  |
| Mg6  | -2.880066 | 1.026253  | 1.740814  |
| Mg7  | -2.319901 | 3.449457  | -0.012172 |
| Mg8  | 2.196688  | 2.021788  | 0.000947  |
| Mg9  | -0.132064 | 2.348007  | 1.939314  |
| Mg10 | -0.463233 | -0.080908 | 0.000493  |
| Mg11 | -2.870920 | 1.017976  | -1.756859 |
| Mg12 | -0.123292 | 2.339719  | -1.949343 |
| Mg13 | 7.294143  | -0.395095 | -0.000168 |
| Mg14 | -0.736967 | 0.020709  | 3.685675  |
| Mg15 | 0.452599  | 4.576369  | -0.009314 |
| Mg16 | -1.198105 | -3.005579 | 0.004266  |
| Mg17 | 4.133872  | -0.420630 | 0.013306  |
| Mg18 | -2.640685 | -1.983287 | -2.695525 |
| Mg19 | 1.921416  | -0.069982 | 2.155369  |
| Mg20 | -3.682999 | -1.298207 | -0.004630 |
| Mg21 | 1.836629  | -2.343144 | 0.010366  |

@mg21-isomer04 bp86/6-31G(d) Etot=-4201.985672 Eb=-15.60

|      |           |           |           |
|------|-----------|-----------|-----------|
| Mg1  | 3.460604  | 2.430991  | 0.004828  |
| Mg2  | 0.430435  | 3.160128  | 0.003365  |
| Mg3  | -1.589510 | 1.932883  | -1.908751 |
| Mg4  | -0.601981 | -0.243490 | -3.675420 |
| Mg5  | 1.532623  | 1.342438  | 2.155620  |
| Mg6  | -2.009165 | -3.133229 | -0.004423 |
| Mg7  | -2.571131 | 4.021013  | 0.001112  |
| Mg8  | -0.607490 | -0.249393 | 3.675058  |
| Mg9  | 1.868733  | -1.599625 | -2.643014 |
| Mg10 | -0.811151 | -3.003679 | -2.713446 |
| Mg11 | 2.922101  | -0.510446 | 0.002903  |
| Mg12 | -0.284882 | -0.158746 | -0.000937 |
| Mg13 | 0.983282  | -2.920968 | 0.000300  |
| Mg14 | -1.592755 | 1.930793  | 1.910520  |
| Mg15 | 1.537931  | 1.347038  | -2.151276 |
| Mg16 | -2.888670 | -0.794721 | 1.702034  |
| Mg17 | 6.166420  | 0.430531  | -0.001753 |
| Mg18 | -4.105060 | 1.423504  | -0.001906 |
| Mg19 | 1.865177  | -1.605088 | 2.645974  |
| Mg20 | -0.817395 | -3.006504 | 2.708660  |
| Mg21 | -2.888117 | -0.793432 | -1.709447 |

@mg21-isomer05 bp86/6-31G(d) Etot=-4201.982209 Eb=-15.50

|      |           |           |           |
|------|-----------|-----------|-----------|
| Mg1  | 0.589644  | -2.297217 | -2.122997 |
| Mg2  | 0.885127  | -2.674812 | 1.090304  |
| Mg3  | 2.231164  | 1.433980  | 3.596396  |
| Mg4  | 5.394008  | -0.096745 | -0.860310 |
| Mg5  | -1.837760 | 3.065638  | -2.981256 |
| Mg6  | -0.579012 | 0.330977  | -3.125193 |
| Mg7  | -2.357673 | -1.761293 | -1.502101 |
| Mg8  | -3.085236 | 1.058756  | -1.130390 |
| Mg9  | 0.990440  | 2.850214  | -2.253659 |
| Mg10 | -2.095764 | -2.220523 | 1.707105  |
| Mg11 | -1.157506 | -4.229001 | -0.424346 |
| Mg12 | 2.756033  | -0.395619 | 1.298196  |
| Mg13 | 2.321171  | 0.228238  | -1.893070 |
| Mg14 | 3.302436  | -2.510498 | -0.902613 |
| Mg15 | -4.694450 | -1.038425 | 0.588391  |
| Mg16 | -0.417691 | 2.527015  | 2.987222  |
| Mg17 | -0.030059 | -0.517869 | 3.182944  |
| Mg18 | -0.227015 | 0.053028  | 0.034444  |
| Mg19 | 1.790506  | 2.364545  | 0.623285  |
| Mg20 | -2.610823 | 0.777256  | 1.984143  |



|                                                          |           |           |           |
|----------------------------------------------------------|-----------|-----------|-----------|
| Mg21                                                     | -1.167539 | 3.052357  | 0.103505  |
| @mg21-isomer06 bp86/6-31G(d) Etot=-4201.979379 Eb=-15.41 |           |           |           |
| Mg1                                                      | 2.795142  | 1.984461  | 0.152376  |
| Mg2                                                      | 2.917701  | -0.852721 | 0.960148  |
| Mg3                                                      | -2.725934 | -1.871183 | -1.642517 |
| Mg4                                                      | -1.303058 | 2.162846  | 2.502312  |
| Mg5                                                      | -3.847477 | 0.908273  | -2.065530 |
| Mg6                                                      | 0.140285  | 0.118701  | 0.155867  |
| Mg7                                                      | 0.194935  | -2.141973 | -2.044513 |
| Mg8                                                      | -1.356449 | -2.552086 | 1.073526  |
| Mg9                                                      | 0.698836  | 3.810155  | 1.113508  |
| Mg10                                                     | -0.982400 | 0.561594  | -2.793716 |
| Mg11                                                     | -2.843014 | 0.056432  | 0.900331  |
| Mg12                                                     | -1.772420 | 2.557945  | -0.483385 |
| Mg13                                                     | 4.902571  | 0.226192  | -1.235715 |
| Mg14                                                     | 1.407529  | 1.061182  | 2.917845  |
| Mg15                                                     | 3.197299  | -2.310320 | -1.812748 |
| Mg16                                                     | 0.813742  | 3.076677  | -1.900867 |
| Mg17                                                     | 2.002327  | 0.359111  | -2.450813 |
| Mg18                                                     | 1.117406  | -2.088670 | 3.088878  |
| Mg19                                                     | 1.439945  | -3.435990 | 0.406328  |
| Mg20                                                     | -5.540319 | -1.043399 | -0.409905 |
| Mg21                                                     | -1.256645 | -0.587228 | 3.568590  |
| @mg21-isomer07 bp86/6-31G(d) Etot=-4201.977037 Eb=-15.34 |           |           |           |
| Mg1                                                      | -0.142556 | -1.555191 | 2.802321  |
| Mg2                                                      | 2.379756  | -0.050428 | -2.923282 |
| Mg3                                                      | 2.378046  | -2.560279 | -1.419210 |
| Mg4                                                      | -0.145135 | -3.202154 | 0.054607  |
| Mg5                                                      | 0.766753  | -0.000065 | 0.000007  |
| Mg6                                                      | 2.379010  | 2.559133  | 1.419415  |
| Mg7                                                      | -0.143564 | 3.201937  | -0.054604 |
| Mg8                                                      | 3.726943  | -0.000919 | 0.000127  |
| Mg9                                                      | -0.142382 | -1.649929 | -2.747748 |
| Mg10                                                     | 2.379052  | 2.509262  | -1.505669 |
| Mg11                                                     | 2.379580  | 0.049289  | 2.923439  |
| Mg12                                                     | 2.377917  | -2.510416 | 1.505806  |
| Mg13                                                     | -0.141512 | 1.555718  | -2.803442 |
| Mg14                                                     | -0.141698 | 1.650443  | 2.748769  |
| Mg15                                                     | -2.639802 | -0.051065 | -3.032812 |
| Mg16                                                     | -2.642502 | -2.651584 | -1.472172 |
| Mg17                                                     | -2.641072 | 2.652619  | 1.471962  |
| Mg18                                                     | -2.063248 | 0.000284  | -0.000050 |
| Mg19                                                     | -2.640972 | 2.600955  | -1.561715 |
| Mg20                                                     | -2.640011 | 0.052329  | 3.032652  |
| Mg21                                                     | -2.642603 | -2.599937 | 1.561600  |
| @mg21-isomer08 bp86/6-31G(d) Etot=-4201.974772 Eb=-15.27 |           |           |           |
| Mg1                                                      | 1.783923  | -1.617926 | 3.665347  |
| Mg2                                                      | -2.297763 | 1.359160  | 2.064835  |
| Mg3                                                      | 0.679063  | 1.206130  | 3.053138  |
| Mg4                                                      | -2.398891 | 3.133416  | -0.636429 |
| Mg5                                                      | 0.951186  | 0.135611  | -3.433858 |
| Mg6                                                      | 0.428065  | 2.798525  | -1.875450 |
| Mg7                                                      | 2.155782  | 2.475299  | 0.643742  |
| Mg8                                                      | 3.165142  | 1.136336  | -1.809860 |
| Mg9                                                      | 2.823602  | -0.429121 | 1.069336  |
| Mg10                                                     | -2.380708 | -1.326447 | 0.771726  |
| Mg11                                                     | 5.715374  | -0.727649 | -0.824360 |
| Mg12                                                     | -1.857581 | -4.094434 | -0.188870 |
| Mg13                                                     | -4.281035 | 0.737853  | -0.360401 |
| Mg14                                                     | 0.566777  | -2.541436 | 0.951242  |
| Mg15                                                     | 2.423873  | -1.793313 | -1.611048 |

|      |           |           |           |
|------|-----------|-----------|-----------|
| Mg16 | 0.014901  | 0.359724  | -0.014231 |
| Mg17 | -0.523173 | -2.060034 | -2.028374 |
| Mg18 | -1.103071 | -1.205248 | 3.413508  |
| Mg19 | -1.863403 | 0.697721  | -2.399412 |
| Mg20 | -3.536701 | -1.857366 | -1.966787 |
| Mg21 | -0.465363 | 3.613200  | 1.516204  |

@mg21-isomer09 bp86/6-31G(d) Etot=-4201.974282 Eb=-15.26

|      |           |           |           |
|------|-----------|-----------|-----------|
| Mg1  | 2.274546  | -0.227268 | -1.431292 |
| Mg2  | 3.353898  | -0.534939 | 1.433867  |
| Mg3  | -0.478340 | 0.075597  | -0.072673 |
| Mg4  | -3.539944 | 1.630526  | -0.849188 |
| Mg5  | -0.183248 | -2.038125 | -2.346106 |
| Mg6  | -3.159273 | -1.245462 | -0.134813 |
| Mg7  | -1.143328 | -3.155777 | 0.955146  |
| Mg8  | 0.611349  | -1.145150 | 2.572751  |
| Mg9  | -0.224383 | -4.806623 | -1.358102 |
| Mg10 | -3.665221 | 1.223913  | 2.059128  |
| Mg11 | -2.427875 | -1.308485 | 2.936011  |
| Mg12 | -1.293435 | 2.842452  | 0.769907  |
| Mg13 | 1.713120  | -2.773698 | 0.088439  |
| Mg14 | -2.444331 | -0.190270 | -2.973873 |
| Mg15 | -1.026248 | 1.335249  | 3.494521  |
| Mg16 | -1.516220 | 2.878375  | -2.605046 |
| Mg17 | 0.316675  | 0.745137  | -3.500607 |
| Mg18 | 1.437638  | 1.815821  | 1.866467  |
| Mg19 | 1.132657  | 2.630131  | -1.161648 |
| Mg20 | 3.832518  | 2.099228  | 0.100412  |
| Mg21 | 6.429446  | 0.149367  | 0.156700  |

@mg21-isomer10 bp86/6-31G(d) Etot=-4201.971977 Eb=-15.19

|      |           |           |           |
|------|-----------|-----------|-----------|
| Mg1  | 1.492270  | 2.577289  | 0.916974  |
| Mg2  | 0.359702  | 2.156779  | -2.069677 |
| Mg3  | -0.595144 | -1.213624 | 2.931784  |
| Mg4  | -1.434395 | 3.033917  | 0.395850  |
| Mg5  | -0.898305 | -1.071087 | -2.667475 |
| Mg6  | 3.310866  | 1.917742  | -1.470912 |
| Mg7  | 1.401581  | -2.621794 | -1.337949 |
| Mg8  | -2.324211 | -1.869940 | 0.130691  |
| Mg9  | -0.592563 | 1.971626  | 3.167774  |
| Mg10 | 1.883658  | 0.477921  | 3.513133  |
| Mg11 | 0.209496  | -0.004646 | 0.089750  |
| Mg12 | -0.174704 | -3.659576 | 1.116312  |
| Mg13 | -5.650130 | -0.454360 | 0.583623  |
| Mg14 | -1.244539 | -3.998101 | -1.687494 |
| Mg15 | 1.934218  | -0.169918 | -3.153524 |
| Mg16 | -2.254932 | 3.464456  | -2.632544 |
| Mg17 | 3.906757  | -1.009584 | -1.028277 |
| Mg18 | 2.230969  | -1.793638 | 1.488067  |
| Mg19 | -2.721135 | 0.827369  | -1.300299 |
| Mg20 | -2.741072 | 0.627118  | 1.725660  |
| Mg21 | 3.901612  | 0.812051  | 1.288532  |

@mg21-isomer11 bp86/6-31G(d) Etot=-4201.968955 Eb=-15.10

|      |           |           |           |
|------|-----------|-----------|-----------|
| Mg1  | -0.596829 | -0.147602 | 0.050960  |
| Mg2  | -1.641310 | -1.636242 | -2.739619 |
| Mg3  | 1.660070  | 1.350300  | 1.810089  |
| Mg4  | 0.665073  | 2.568074  | -0.776666 |
| Mg5  | 0.893605  | 0.357660  | -2.917524 |
| Mg6  | -0.477674 | 0.000979  | 3.660265  |
| Mg7  | -3.653194 | -0.313237 | -1.025873 |
| Mg8  | 2.215138  | -1.282321 | -0.749759 |
| Mg9  | -1.395391 | -2.695276 | 2.654560  |
| Mg10 | 0.003662  | -3.205514 | -0.360685 |

|      |           |           |           |
|------|-----------|-----------|-----------|
| Mg11 | 3.401199  | 1.426586  | -0.975803 |
| Mg12 | -1.708045 | 4.297725  | -0.713750 |
| Mg13 | 1.029429  | -2.647458 | -3.274963 |
| Mg14 | 1.403892  | -1.782722 | 2.082027  |
| Mg15 | -3.048491 | -0.197962 | 2.006286  |
| Mg16 | 4.073778  | -0.288912 | 1.617420  |
| Mg17 | -1.825752 | 1.639212  | -2.430276 |
| Mg18 | -3.603603 | 2.287098  | 0.283482  |
| Mg19 | -2.854695 | -2.917325 | -0.001885 |
| Mg20 | -1.070023 | 2.461672  | 1.854100  |
| Mg21 | 6.529164  | 0.725266  | -0.052386 |

@mg21-isomer12 bp86/6-31G(d) Etot=-4201.968532 Eb=-15.09

|      |           |           |           |
|------|-----------|-----------|-----------|
| Mg1  | -0.240325 | 0.804861  | -2.837155 |
| Mg2  | 2.163052  | 0.439558  | -0.903702 |
| Mg3  | -0.538712 | -0.526189 | -0.033451 |
| Mg4  | -3.583357 | 2.520334  | 0.809205  |
| Mg5  | 1.220300  | 3.180523  | -1.413946 |
| Mg6  | -2.387302 | 0.207449  | 2.313448  |
| Mg7  | 2.398506  | 2.537696  | 1.365119  |
| Mg8  | 3.802562  | -0.182279 | 2.017495  |
| Mg9  | -3.074184 | 0.416911  | -1.445688 |
| Mg10 | 4.990344  | 1.503810  | -0.254523 |
| Mg11 | 1.419629  | -2.196287 | -2.213743 |
| Mg12 | -3.108199 | -2.237339 | 0.211620  |
| Mg13 | -0.851858 | -2.544994 | 2.296547  |
| Mg14 | -1.559766 | -2.083361 | -2.578424 |
| Mg15 | -0.604661 | 2.527444  | 1.086368  |
| Mg16 | -0.427789 | -3.825360 | -0.440673 |
| Mg17 | 1.887894  | -2.309693 | 0.891735  |
| Mg18 | -5.116238 | -0.078587 | 0.866086  |
| Mg19 | -1.788801 | 3.161586  | -1.680813 |
| Mg20 | 4.523019  | -1.537446 | -0.678867 |
| Mg21 | 0.875885  | 0.221362  | 2.623362  |

@mg21-isomer13 bp86/6-31G(d) Etot=-4201.966855 Eb=-15.04

|      |           |           |           |
|------|-----------|-----------|-----------|
| Mg1  | -0.749434 | -0.148583 | -0.005231 |
| Mg2  | 1.483043  | 1.565109  | -2.936869 |
| Mg3  | -1.596494 | 2.262693  | 1.875202  |
| Mg4  | 1.305287  | 1.031031  | 1.971939  |
| Mg5  | -1.597428 | -2.489637 | -1.656877 |
| Mg6  | 2.821655  | 2.593688  | -0.208743 |
| Mg7  | 4.505680  | -2.206298 | 0.734578  |
| Mg8  | -3.369536 | -2.179240 | 0.869822  |
| Mg9  | -4.102324 | 0.601096  | 1.516438  |
| Mg10 | -0.785336 | -3.486727 | 1.293852  |
| Mg11 | -3.150994 | 2.357129  | -0.743507 |
| Mg12 | 0.871397  | 4.008333  | 1.703817  |
| Mg13 | 1.620608  | -2.014442 | 2.009766  |
| Mg14 | 5.252867  | 0.705387  | 0.304242  |
| Mg15 | 2.341286  | -0.348268 | -0.622511 |
| Mg16 | 0.869263  | -1.437985 | -3.111169 |
| Mg17 | 1.410142  | -3.253763 | -0.723003 |
| Mg18 | -1.403230 | -0.803003 | 2.848425  |
| Mg19 | -0.206039 | 2.893867  | -0.886495 |
| Mg20 | -1.516149 | 0.755951  | -2.840645 |
| Mg21 | -4.004263 | -0.406339 | -1.393031 |

@mg21-isomer14 bp86/6-31G(d) Etot=-4201.965640 Eb=-15.00

|     |           |           |           |
|-----|-----------|-----------|-----------|
| Mg1 | -0.815718 | -0.123867 | -0.036084 |
| Mg2 | -1.628535 | 2.883809  | -0.677444 |
| Mg3 | -1.361068 | 1.777978  | 2.429537  |
| Mg4 | 2.109863  | 0.121291  | -1.305404 |
| Mg5 | 2.840770  | -1.117000 | 1.564778  |

|      |           |           |           |
|------|-----------|-----------|-----------|
| Mg6  | -1.731186 | -3.048713 | 0.410341  |
| Mg7  | 5.376493  | -0.393594 | -0.311252 |
| Mg8  | 3.447329  | -2.692127 | -0.904660 |
| Mg9  | -2.950141 | -1.064972 | 2.398194  |
| Mg10 | 0.108590  | -1.228779 | 2.872198  |
| Mg11 | -0.400597 | 1.081220  | -2.877459 |
| Mg12 | 0.202792  | 4.150681  | 1.315090  |
| Mg13 | -3.422659 | 0.847606  | -2.188745 |
| Mg14 | -2.198692 | -1.861183 | -2.497689 |
| Mg15 | -3.893669 | 1.334841  | 0.731906  |
| Mg16 | 1.486854  | 1.517668  | 1.467275  |
| Mg17 | 1.292595  | 3.076928  | -1.347607 |
| Mg18 | -4.260742 | -1.486964 | -0.312959 |
| Mg19 | 0.560947  | -2.535981 | -1.657395 |
| Mg20 | 1.109012  | -3.513919 | 1.151227  |
| Mg21 | 4.127762  | 2.275077  | -0.223849 |

@mg21-isomer15 bp86/6-31G(d) Etot=-4201.964283 Eb=-14.96

|      |           |           |           |
|------|-----------|-----------|-----------|
| Mg1  | -0.829380 | 2.722324  | 0.014438  |
| Mg2  | -2.340429 | -0.716600 | -2.539248 |
| Mg3  | 1.563833  | 0.221974  | -0.938092 |
| Mg4  | 0.166021  | 1.008004  | 2.484530  |
| Mg5  | -1.914270 | -1.165197 | 3.021237  |
| Mg6  | -1.167229 | -0.288139 | 0.040287  |
| Mg7  | 1.128657  | 2.837916  | -2.401633 |
| Mg8  | 2.563470  | 2.486237  | 3.415326  |
| Mg9  | -2.087122 | -3.038333 | 0.459347  |
| Mg10 | 3.138472  | -0.040374 | 1.677489  |
| Mg11 | 0.341255  | 0.235683  | -3.813671 |
| Mg12 | -3.620891 | 1.487193  | -0.661583 |
| Mg13 | 0.275349  | -2.355284 | -2.241679 |
| Mg14 | 5.272858  | -0.436865 | -0.833797 |
| Mg15 | 2.823053  | -2.466811 | -0.402421 |
| Mg16 | 0.747649  | -1.981422 | 1.781434  |
| Mg17 | -2.842035 | 1.648139  | 2.325416  |
| Mg18 | 2.262192  | 2.777007  | 0.456535  |
| Mg19 | -1.770258 | 2.265400  | -2.965561 |
| Mg20 | -4.268760 | -0.771258 | 1.237311  |
| Mg21 | 0.557565  | -4.429595 | -0.115664 |

@mg21-isomer16 bp86/6-31G(d) Etot=-4201.963199 Eb=-14.93

|      |           |           |           |
|------|-----------|-----------|-----------|
| Mg1  | -0.358460 | 0.198651  | 0.252329  |
| Mg2  | -4.392715 | 0.145533  | 0.618543  |
| Mg3  | -2.228042 | 1.427708  | 2.316405  |
| Mg4  | -0.057935 | -0.889729 | 3.284438  |
| Mg5  | 1.571229  | -0.742606 | -1.896112 |
| Mg6  | -2.284612 | -2.008191 | 1.518893  |
| Mg7  | 0.429120  | -3.367758 | 1.804621  |
| Mg8  | 2.216428  | -3.347382 | -0.590941 |
| Mg9  | 4.635343  | -1.592637 | -1.037817 |
| Mg10 | 0.761889  | 1.985626  | 3.015842  |
| Mg11 | 2.252568  | 2.370887  | 0.466854  |
| Mg12 | -2.608297 | 2.281035  | -0.730292 |
| Mg13 | 0.254236  | 2.440279  | -1.870500 |
| Mg14 | -0.439202 | 3.655632  | 0.849500  |
| Mg15 | 3.250321  | 1.832902  | -2.286687 |
| Mg16 | -4.553948 | 0.553959  | -2.315037 |
| Mg17 | 2.409924  | -0.830133 | 1.275930  |
| Mg18 | -0.705738 | -2.817650 | -1.048818 |
| Mg19 | -1.567273 | -0.207056 | -2.492116 |
| Mg20 | 5.027346  | 1.049337  | 0.071498  |
| Mg21 | -3.612182 | -2.138406 | -1.206533 |

@mg21-isomer17 bp86/6-31G(d) Etot=-4201.962577 Eb=-14.91

|      |           |           |           |
|------|-----------|-----------|-----------|
| Mg1  | -1.004608 | -0.854405 | -2.608186 |
| Mg2  | -3.886370 | -1.426470 | -1.408148 |
| Mg3  | -3.182595 | 1.310838  | -2.488712 |
| Mg4  | 1.863592  | -0.005086 | -1.756282 |
| Mg5  | -1.605038 | -3.366943 | -0.956219 |
| Mg6  | -0.363480 | 2.311607  | -1.888984 |
| Mg7  | -4.507432 | 0.719543  | 0.449219  |
| Mg8  | 1.320387  | -2.881754 | -1.207833 |
| Mg9  | 2.428695  | 2.582653  | -0.257149 |
| Mg10 | -2.709195 | -1.683314 | 1.461366  |
| Mg11 | -0.098309 | -3.533189 | 1.605213  |
| Mg12 | -0.077473 | 3.420182  | 1.065591  |
| Mg13 | -0.507923 | 0.097881  | 0.204809  |
| Mg14 | 4.344052  | -1.707646 | -0.921873 |
| Mg15 | 4.862444  | 1.125931  | -1.745489 |
| Mg16 | -2.113100 | 1.392214  | 2.384532  |
| Mg17 | -2.717305 | 2.986089  | -0.073047 |
| Mg18 | 2.098833  | -1.428833 | 1.299225  |
| Mg19 | 1.600745  | 1.367391  | 2.488026  |
| Mg20 | -0.251782 | -1.078282 | 3.238911  |
| Mg21 | 4.505862  | 0.651593  | 1.115029  |

@mg21-isomer18 bp86/6-31G(d) Etot=-4201.962552 Eb=-14.91

|      |           |           |           |
|------|-----------|-----------|-----------|
| Mg1  | -0.747752 | 0.701094  | -2.440919 |
| Mg2  | 1.285395  | 3.184777  | 1.209690  |
| Mg3  | -1.294904 | 2.914747  | -0.485219 |
| Mg4  | 1.330347  | 0.206966  | -0.108012 |
| Mg5  | -3.665930 | 1.280872  | -1.768000 |
| Mg6  | -0.151730 | -2.140391 | -1.552018 |
| Mg7  | -2.998129 | -1.624751 | -2.324637 |
| Mg8  | 1.509143  | 2.863776  | -1.841627 |
| Mg9  | -3.900020 | 1.845936  | 1.141045  |
| Mg10 | 3.246525  | 0.385139  | -2.510250 |
| Mg11 | -2.353205 | -2.983746 | 0.421401  |
| Mg12 | 0.931727  | 0.623109  | 2.887982  |
| Mg13 | 0.645157  | -3.987361 | 0.604195  |
| Mg14 | -0.412128 | -2.119221 | 2.656818  |
| Mg15 | -4.708536 | -0.956568 | 0.089543  |
| Mg16 | -1.555828 | -0.063275 | 0.695558  |
| Mg17 | 2.525174  | -1.911069 | 1.862721  |
| Mg18 | 2.773468  | -2.446263 | -1.162190 |
| Mg19 | 3.957762  | 2.176865  | 0.055522  |
| Mg20 | -1.311763 | 2.656105  | 2.567341  |
| Mg21 | 4.895226  | -0.606741 | 0.001057  |

@mg21-isomer19 bp86/6-31G(d) Etot=-4201.961105 Eb=-14.86

|      |           |           |           |
|------|-----------|-----------|-----------|
| Mg1  | -2.635843 | 2.361683  | -2.222793 |
| Mg2  | 0.118157  | 2.967122  | -0.949004 |
| Mg3  | -2.403923 | 2.535326  | 0.737545  |
| Mg4  | 2.830551  | 2.138674  | 3.589834  |
| Mg5  | 2.873858  | 2.362627  | 0.466197  |
| Mg6  | -0.251766 | 0.496350  | -2.913495 |
| Mg7  | 2.553330  | 1.769530  | -2.437341 |
| Mg8  | -5.155559 | 1.347967  | -0.142078 |
| Mg9  | 0.208028  | 2.322881  | 2.165849  |
| Mg10 | 0.664084  | 0.020082  | 0.001017  |
| Mg11 | 4.254438  | -0.147113 | -0.843608 |
| Mg12 | -2.434803 | -0.362494 | -0.934238 |
| Mg13 | -4.978738 | -1.377697 | 0.978484  |
| Mg14 | 3.034453  | -0.446603 | 1.975314  |
| Mg15 | 2.310039  | -1.307551 | -2.920619 |
| Mg16 | -1.790679 | -0.104121 | 2.164034  |
| Mg17 | -0.279403 | -2.447982 | -1.824039 |
| Mg18 | -2.217014 | -2.842240 | 0.768905  |

|      |          |           |           |
|------|----------|-----------|-----------|
| Mg19 | 0.514246 | -2.212149 | 2.198767  |
| Mg20 | 2.559690 | -2.565157 | -0.138280 |
| Mg21 | 0.226854 | -4.509133 | 0.279550  |

@mg21-isomer20 bp86/6-31G(d) Etot=-4201.958806 Eb=-14.80

|      |           |           |           |
|------|-----------|-----------|-----------|
| Mg1  | -1.288073 | 2.835494  | 2.131331  |
| Mg2  | -0.848920 | 0.364552  | 0.069413  |
| Mg3  | 1.094957  | 3.053230  | 0.336060  |
| Mg4  | -3.758247 | 1.819063  | 0.546274  |
| Mg5  | 0.380745  | 1.854002  | -2.410842 |
| Mg6  | 3.472475  | 1.383745  | 1.247344  |
| Mg7  | -2.410256 | -0.303404 | 2.513590  |
| Mg8  | -2.697004 | 0.814825  | -2.317687 |
| Mg9  | 0.802798  | 0.683244  | 2.734429  |
| Mg10 | 5.154102  | -0.187701 | -0.662954 |
| Mg11 | -4.517967 | -0.967518 | 0.128756  |
| Mg12 | -0.569955 | -1.565148 | -2.249701 |
| Mg13 | 3.697052  | -2.816147 | -1.032908 |
| Mg14 | 2.621888  | -1.588091 | 1.737178  |
| Mg15 | -1.614328 | 3.431242  | -0.883511 |
| Mg16 | -0.150414 | -2.392018 | 2.693813  |
| Mg17 | 1.908551  | -0.357475 | -0.967918 |
| Mg18 | -3.434481 | -2.345597 | -2.288996 |
| Mg19 | 0.826860  | -3.275057 | -0.112586 |
| Mg20 | 3.397290  | 2.332026  | -1.606209 |
| Mg21 | -2.067075 | -2.773267 | 0.395123  |

@mg21-isomer21 bp86/6-31G(d) Etot=-4201.958787 Eb=-14.80

|      |           |           |           |
|------|-----------|-----------|-----------|
| Mg1  | 0.022138  | 1.653550  | -2.333676 |
| Mg2  | -1.043332 | 0.000256  | 0.026223  |
| Mg3  | -3.106923 | -2.644613 | 1.340390  |
| Mg4  | -2.565323 | 0.002698  | -2.770793 |
| Mg5  | -2.824136 | -0.000253 | 2.607186  |
| Mg6  | 0.019617  | -1.652531 | -2.335419 |
| Mg7  | -0.239670 | -1.725688 | 2.452045  |
| Mg8  | 1.935117  | 1.649238  | 0.170124  |
| Mg9  | 2.634084  | -0.001175 | -2.290311 |
| Mg10 | 5.102103  | -1.488764 | -0.952400 |
| Mg11 | 1.932678  | -1.652425 | 0.168371  |
| Mg12 | -0.489369 | -3.595813 | 0.015491  |
| Mg13 | 5.172123  | 0.001653  | 1.679449  |
| Mg14 | -4.227859 | 0.002083  | -0.159944 |
| Mg15 | 2.303668  | -0.003126 | 2.711235  |
| Mg16 | -0.237672 | 1.722174  | 2.453731  |
| Mg17 | -2.952438 | -2.660706 | -1.594840 |
| Mg18 | -2.949497 | 2.665415  | -1.592560 |
| Mg19 | 5.103182  | 1.487408  | -0.955814 |
| Mg20 | -0.484822 | 3.594937  | 0.018888  |
| Mg21 | -3.103669 | 2.645681  | 1.342623  |

@mg21-isomer22 bp86/6-31G(d) Etot=-4201.958439 Eb=-14.79

|      |           |           |           |
|------|-----------|-----------|-----------|
| Mg1  | 0.940288  | 0.271750  | -2.441578 |
| Mg2  | 2.218357  | 1.628812  | -0.029361 |
| Mg3  | 3.898529  | 0.130847  | -2.262976 |
| Mg4  | -0.829502 | -0.017220 | 0.168590  |
| Mg5  | 5.527584  | -1.499741 | -0.228908 |
| Mg6  | 5.678702  | 1.445520  | -0.157085 |
| Mg7  | -3.638734 | -2.096031 | -1.344790 |
| Mg8  | -0.510934 | 2.807099  | -1.231781 |
| Mg9  | 1.241614  | -0.099230 | 2.452933  |
| Mg10 | -3.169056 | -1.994187 | 1.685427  |
| Mg11 | -2.188489 | -4.302012 | 0.020858  |
| Mg12 | -0.088920 | -2.750455 | 1.509733  |
| Mg13 | -3.563804 | 2.934147  | -1.688845 |

|      |           |           |           |
|------|-----------|-----------|-----------|
| Mg14 | 0.048399  | 2.671520  | 1.822279  |
| Mg15 | -0.508210 | -2.444848 | -1.736263 |
| Mg16 | 4.200130  | -0.023658 | 2.048928  |
| Mg17 | -2.226193 | 0.689698  | 2.702597  |
| Mg18 | -4.087425 | 0.574680  | 0.218705  |
| Mg19 | -2.229914 | 0.313904  | -2.444675 |
| Mg20 | -2.856465 | 3.272499  | 1.141903  |
| Mg21 | 2.144044  | -1.513094 | -0.205692 |

@mg21-isomer23 bp86/6-31G(d) Etot=-4201.958285 Eb=-14.78

|      |           |           |           |
|------|-----------|-----------|-----------|
| Mg1  | 3.081378  | -1.968296 | -1.039347 |
| Mg2  | 4.008672  | -1.798851 | 1.845522  |
| Mg3  | 1.994799  | 2.962782  | 1.633766  |
| Mg4  | -1.647795 | -1.161063 | -1.111686 |
| Mg5  | 1.148585  | -2.555689 | 1.325327  |
| Mg6  | -4.172448 | -1.796786 | 0.637962  |
| Mg7  | -1.035917 | 1.766633  | -2.199863 |
| Mg8  | 0.958349  | -0.567708 | -2.871852 |
| Mg9  | -3.978846 | 0.648665  | -2.112267 |
| Mg10 | 0.447972  | -3.288188 | -1.598018 |
| Mg11 | 3.736453  | 0.843606  | 0.269787  |
| Mg12 | -5.940494 | 0.462906  | 0.146168  |
| Mg13 | 1.831388  | 2.567328  | -1.589166 |
| Mg14 | 1.792132  | 0.183134  | 2.867028  |
| Mg15 | -0.529084 | 3.649215  | 0.079392  |
| Mg16 | 0.575771  | 0.414051  | 0.112049  |
| Mg17 | -0.622261 | 2.150748  | 2.773948  |
| Mg18 | -2.588775 | 1.422818  | 0.542101  |
| Mg19 | 3.897289  | 0.448684  | -2.678056 |
| Mg20 | -1.617483 | -3.525155 | 0.756154  |
| Mg21 | -1.339687 | -0.858833 | 2.211051  |

@mg21-isomer24 bp86/6-31G(d) Etot=-4201.957314 Eb=-14.75

|      |           |           |           |
|------|-----------|-----------|-----------|
| Mg1  | -1.681883 | -0.234169 | 0.132440  |
| Mg2  | 2.512617  | 0.624952  | -2.290681 |
| Mg3  | 0.724508  | -3.141651 | 0.728083  |
| Mg4  | -1.759528 | -2.239122 | 2.390175  |
| Mg5  | -2.157892 | -3.148328 | -0.487755 |
| Mg6  | 0.187669  | -1.710923 | -1.899272 |
| Mg7  | -4.671182 | -1.017558 | -0.226024 |
| Mg8  | 3.824712  | 1.869040  | 0.399585  |
| Mg9  | 0.949379  | -1.269496 | 3.179413  |
| Mg10 | -0.585869 | 1.381886  | -2.290991 |
| Mg11 | 1.137539  | 0.427700  | 0.440969  |
| Mg12 | 1.395694  | 3.285924  | -1.096544 |
| Mg13 | 1.159651  | 3.123444  | 1.931605  |
| Mg14 | 3.337948  | -1.449954 | 1.348360  |
| Mg15 | -2.764620 | -1.077582 | -2.697417 |
| Mg16 | 2.980003  | -2.460246 | -1.409160 |
| Mg17 | -3.892073 | 1.544479  | 1.347483  |
| Mg18 | 5.182378  | -0.418650 | -0.849732 |
| Mg19 | -3.559544 | 1.721155  | -1.591454 |
| Mg20 | -1.333764 | 3.025827  | 0.207232  |
| Mg21 | -0.985744 | 1.163273  | 2.733685  |

@mg21-isomer25 bp86/6-31G(d) Etot=-4201.956783 Eb=-14.74

|     |           |           |           |
|-----|-----------|-----------|-----------|
| Mg1 | 3.259409  | 0.733013  | -0.362920 |
| Mg2 | 1.499376  | 0.362313  | -2.999805 |
| Mg3 | 0.154788  | 0.043478  | -0.016444 |
| Mg4 | -1.111634 | 1.519371  | 2.892243  |
| Mg5 | -3.162933 | -0.383731 | 1.854295  |
| Mg6 | -2.479348 | 2.083029  | 0.235839  |
| Mg7 | 0.324509  | 3.275918  | 0.652027  |
| Mg8 | -0.162526 | -2.236610 | -2.412756 |

|      |           |           |           |
|------|-----------|-----------|-----------|
| Mg9  | 2.690607  | -2.038406 | -1.588615 |
| Mg10 | -5.310541 | 1.060301  | -0.374573 |
| Mg11 | 1.895357  | 1.359761  | 2.399249  |
| Mg12 | -5.110993 | -1.875200 | -0.372066 |
| Mg13 | 3.395817  | 3.510246  | 0.885648  |
| Mg14 | -1.927401 | -2.421858 | 0.057659  |
| Mg15 | 2.568747  | -1.503523 | 1.672154  |
| Mg16 | -2.554460 | -0.161830 | -1.810470 |
| Mg17 | 2.115869  | 3.150667  | -1.848844 |
| Mg18 | 4.135855  | -3.752321 | 0.445012  |
| Mg19 | -0.700187 | 2.366651  | -2.206287 |
| Mg20 | 0.854636  | -3.505590 | 0.306981  |
| Mg21 | -0.374948 | -1.585676 | 2.591673  |

@mg21-isomer26 bp86/6-31G(d) Etot=-4201.956605 Eb=-14.73

|      |           |           |           |
|------|-----------|-----------|-----------|
| Mg1  | 2.882846  | 0.830180  | 1.727553  |
| Mg2  | 2.727103  | 2.545459  | -0.915195 |
| Mg3  | 5.250164  | 0.936731  | -0.264274 |
| Mg4  | 1.398681  | -2.023485 | 1.754024  |
| Mg5  | 4.108225  | -1.793711 | 0.233565  |
| Mg6  | 1.021564  | 3.250605  | 1.708565  |
| Mg7  | -1.440188 | -2.067485 | 2.760222  |
| Mg8  | 1.679605  | -2.931434 | -1.309885 |
| Mg9  | -3.444979 | -2.286799 | 0.308483  |
| Mg10 | -4.617503 | 0.645926  | 0.738878  |
| Mg11 | -0.299487 | 2.948511  | -0.931465 |
| Mg12 | 1.049507  | -0.007953 | -0.819157 |
| Mg13 | -1.271546 | 0.869196  | -2.786013 |
| Mg14 | -2.004538 | 2.698755  | 1.609111  |
| Mg15 | -1.213738 | -2.070101 | -1.854620 |
| Mg16 | 0.044345  | 0.611441  | 2.845103  |
| Mg17 | -1.591602 | 0.058273  | 0.371294  |
| Mg18 | -3.980136 | -0.441409 | -1.999666 |
| Mg19 | -0.664404 | -3.850483 | 0.500621  |
| Mg20 | 3.621903  | -0.423783 | -2.431962 |
| Mg21 | -3.255822 | 2.501566  | -1.245183 |

@mg21-isomer27 bp86/6-31G(d) Etot=-4201.954838 Eb=-14.68

|      |           |           |           |
|------|-----------|-----------|-----------|
| Mg1  | -0.952851 | -0.250630 | 0.083190  |
| Mg2  | -1.541064 | 3.134065  | -0.170376 |
| Mg3  | 1.447718  | 1.804659  | -0.946512 |
| Mg4  | 0.820702  | 4.206777  | 1.079806  |
| Mg5  | -0.254941 | -0.262684 | -2.934660 |
| Mg6  | 0.132007  | -2.500591 | 2.097376  |
| Mg7  | 0.035397  | -2.959352 | -1.191923 |
| Mg8  | -0.198529 | 1.578873  | 2.234182  |
| Mg9  | 2.544671  | -3.317606 | 0.319582  |
| Mg10 | 2.153011  | -0.435159 | 1.207918  |
| Mg11 | 5.139652  | -1.827537 | -0.158506 |
| Mg12 | -3.126990 | 1.115139  | -1.800019 |
| Mg13 | -3.476198 | 1.594427  | 1.456873  |
| Mg14 | 2.423383  | -1.080835 | -1.828252 |
| Mg15 | -2.441376 | -3.156399 | 0.746656  |
| Mg16 | -4.517007 | -0.941119 | 0.413574  |
| Mg17 | -2.718343 | -1.886831 | -1.953235 |
| Mg18 | 3.012926  | 2.381194  | 1.829726  |
| Mg19 | 4.687837  | 1.048639  | -0.275724 |
| Mg20 | -2.467344 | -0.954801 | 2.809358  |
| Mg21 | -0.702661 | 2.709770  | -3.019034 |

@mg21-isomer28 bp86/6-31G(d) Etot=-4201.948791 Eb=-14.50

|     |          |          |           |
|-----|----------|----------|-----------|
| Mg1 | 0.898525 | 0.717510 | -2.344879 |
| Mg2 | 2.242845 | 1.449579 | 0.352876  |
| Mg3 | 3.854327 | 0.615140 | -2.226593 |



|      |           |           |           |
|------|-----------|-----------|-----------|
| Mg4  | -0.914748 | -0.174467 | 0.231939  |
| Mg5  | 5.430614  | -1.292930 | -0.325324 |
| Mg6  | 5.623372  | 1.633578  | 0.080056  |
| Mg7  | -3.688287 | -1.593953 | -0.816142 |
| Mg8  | -0.298171 | 2.883815  | -0.530536 |
| Mg9  | 1.426290  | -0.925976 | 2.192010  |
| Mg10 | -2.684389 | -2.777156 | 1.817843  |
| Mg11 | -2.402873 | -4.245064 | -0.792538 |
| Mg12 | 0.095268  | -3.220061 | 0.628267  |
| Mg13 | -3.085487 | 3.513298  | -1.524288 |
| Mg14 | -0.138281 | 1.815229  | 2.389389  |
| Mg15 | -0.626005 | -2.061128 | -2.143769 |
| Mg16 | 4.329803  | -0.096462 | 2.236100  |
| Mg17 | -2.955562 | 0.244404  | 2.451089  |
| Mg18 | -4.374935 | 1.238921  | -0.086518 |
| Mg19 | -2.253384 | 0.696503  | -2.343459 |
| Mg20 | -2.669769 | 3.120452  | 1.526040  |
| Mg21 | 2.190847  | -1.541233 | -0.771564 |

@mg21-isomer29 bp86/6-31G(d) Etot=-4201.944715 Eb=-14.38

|      |           |           |           |
|------|-----------|-----------|-----------|
| Mg1  | -2.362012 | 2.092601  | 1.423513  |
| Mg2  | -4.190844 | 1.217660  | -1.288132 |
| Mg3  | -4.778423 | -1.598242 | -0.190613 |
| Mg4  | -1.524584 | -0.166005 | -0.361552 |
| Mg5  | 3.703185  | -3.103640 | 1.071741  |
| Mg6  | -2.113539 | -3.110201 | -0.086580 |
| Mg7  | -4.979730 | 0.607357  | 1.695175  |
| Mg8  | -2.448619 | -1.136093 | 2.321258  |
| Mg9  | 0.086705  | -2.230229 | -2.114505 |
| Mg10 | 1.810585  | 3.425775  | -1.558661 |
| Mg11 | 3.097426  | -1.878973 | -1.629300 |
| Mg12 | -1.146868 | 2.599871  | -1.458975 |
| Mg13 | 3.022028  | 1.856678  | 0.923093  |
| Mg14 | 0.812166  | -2.120088 | 0.868951  |
| Mg15 | 0.302643  | 3.736844  | 1.100335  |
| Mg16 | 0.340647  | 0.729574  | 2.027122  |
| Mg17 | 2.934883  | -0.697742 | 2.622449  |
| Mg18 | 5.017739  | -0.466973 | 0.424160  |
| Mg19 | -3.005030 | -1.319461 | -2.657187 |
| Mg20 | 1.284346  | 0.417696  | -1.221469 |
| Mg21 | 4.137295  | 1.143591  | -1.910820 |

@mg21-isomer30 bp86/6-31G(d) Etot=-4201.944048 Eb=-14.36

|      |           |           |           |
|------|-----------|-----------|-----------|
| Mg1  | 0.506938  | 4.003913  | 0.034461  |
| Mg2  | -2.301025 | 3.060666  | -0.307761 |
| Mg3  | -0.627363 | 2.332780  | 2.217625  |
| Mg4  | -3.257350 | 0.724066  | 1.883475  |
| Mg5  | -0.613650 | -0.323342 | 0.693305  |
| Mg6  | 1.999351  | 1.319329  | 1.088130  |
| Mg7  | -2.790848 | -2.882227 | -1.144052 |
| Mg8  | -0.300835 | -1.497440 | -2.232306 |
| Mg9  | 2.064781  | -3.285585 | -1.248166 |
| Mg10 | 4.488734  | -0.235966 | 2.434988  |
| Mg11 | 1.918068  | -1.775990 | 1.486610  |
| Mg12 | -5.006850 | 1.845380  | -0.338072 |
| Mg13 | -0.342496 | -3.597928 | 0.518860  |
| Mg14 | -2.797232 | -2.328591 | 1.869230  |
| Mg15 | 2.396812  | -0.235695 | -1.643709 |
| Mg16 | 2.865049  | 2.938773  | -1.505716 |
| Mg17 | 4.580888  | -1.869616 | -0.121794 |
| Mg18 | 4.892786  | 1.173611  | -0.292871 |
| Mg19 | -4.926487 | -1.175651 | 0.122774  |
| Mg20 | -0.019762 | 1.609913  | -1.863363 |
| Mg21 | -2.729510 | 0.199600  | -1.651646 |

@mg21-isomer31 bp86/6-31G(d) Etot=-4201.942982 Eb=-14.32

|      |           |           |           |
|------|-----------|-----------|-----------|
| Mg1  | -1.502825 | -0.220018 | -0.662050 |
| Mg2  | -4.375943 | -0.772031 | -1.922947 |
| Mg3  | 1.492897  | -0.690429 | -1.320252 |
| Mg4  | 0.394651  | -0.235064 | 1.773613  |
| Mg5  | 0.079155  | -3.016316 | 0.288922  |
| Mg6  | -2.098445 | -2.171115 | 2.198495  |
| Mg7  | -2.372243 | 1.004878  | 2.128610  |
| Mg8  | 4.645201  | -1.367225 | -1.374990 |
| Mg9  | -1.305593 | 3.062597  | -0.200818 |
| Mg10 | 1.781221  | 2.144432  | 0.109088  |
| Mg11 | 3.075092  | -1.648060 | 1.304530  |
| Mg12 | -4.656094 | -1.089227 | 1.061895  |
| Mg13 | -2.545389 | 1.822244  | -2.700026 |
| Mg14 | -2.888237 | -3.144274 | -0.525799 |
| Mg15 | 4.821032  | 0.921585  | 0.544372  |
| Mg16 | -4.236281 | 1.620617  | -0.139691 |
| Mg17 | 0.386532  | 1.943628  | -2.535978 |
| Mg18 | 2.934276  | 1.193768  | 2.800595  |
| Mg19 | 2.662880  | -3.591312 | -1.055166 |
| Mg20 | 3.572034  | 1.373697  | -2.241376 |
| Mg21 | 0.136078  | 2.857625  | 2.468972  |

@mg21-isomer32 bp86/6-31G(d) Etot=-4201.941740 Eb=-14.29

|      |           |           |           |
|------|-----------|-----------|-----------|
| Mg1  | 0.006590  | 3.234934  | -2.101760 |
| Mg2  | -2.691581 | 1.851041  | -1.232394 |
| Mg3  | -2.568871 | -3.608440 | 0.404186  |
| Mg4  | 5.304996  | -2.785943 | -0.392471 |
| Mg5  | 2.695001  | 1.847001  | -1.216180 |
| Mg6  | -3.132971 | 2.191701  | 1.732072  |
| Mg7  | 2.731481  | -1.279662 | -1.695404 |
| Mg8  | 1.652157  | 4.345945  | 0.247056  |
| Mg9  | 3.117014  | 2.184465  | 1.751160  |
| Mg10 | 1.628275  | -0.564249 | 1.215249  |
| Mg11 | -2.728026 | -1.298847 | -1.689111 |
| Mg12 | -0.007869 | 1.971764  | 1.411039  |
| Mg13 | -0.000833 | -3.072650 | 1.960371  |
| Mg14 | -1.650441 | 4.344755  | 0.239445  |
| Mg15 | 4.689521  | 0.037817  | 0.340101  |
| Mg16 | -5.288915 | -2.796118 | -0.365343 |
| Mg17 | -4.699434 | 0.044023  | 0.316418  |
| Mg18 | -0.004909 | 0.278197  | -1.459739 |
| Mg19 | -1.647830 | -0.570017 | 1.218688  |
| Mg20 | 2.587881  | -3.573387 | 0.416307  |
| Mg21 | 0.008762  | -2.782328 | -1.099691 |

@mg21-isomer33 bp86/6-31G(d) Etot=-4201.936022 Eb=-14.12

|      |           |           |           |
|------|-----------|-----------|-----------|
| Mg1  | 0.213425  | 0.502514  | 0.205363  |
| Mg2  | 0.129817  | -0.869254 | -2.641130 |
| Mg3  | 2.397223  | -1.673128 | -0.778017 |
| Mg4  | -2.113659 | -0.340059 | 1.826042  |
| Mg5  | -0.931680 | 2.230321  | -1.974242 |
| Mg6  | -2.544156 | -0.321000 | -1.429211 |
| Mg7  | -3.729744 | -2.857181 | -0.054212 |
| Mg8  | 2.356157  | 1.191522  | -1.926074 |
| Mg9  | 4.384883  | 3.104351  | -0.457915 |
| Mg10 | 1.369856  | 3.446205  | 0.038547  |
| Mg11 | -4.054542 | 2.171333  | 2.299786  |
| Mg12 | 5.021166  | 0.068756  | -0.575476 |
| Mg13 | 4.120969  | -1.837464 | 1.676169  |
| Mg14 | -1.404830 | 2.975818  | 1.054357  |
| Mg15 | 1.106363  | -1.278530 | 2.381398  |
| Mg16 | -3.913312 | 2.376030  | -0.734648 |

|      |           |           |           |
|------|-----------|-----------|-----------|
| Mg17 | -0.566039 | -2.533491 | 0.203769  |
| Mg18 | 1.960381  | -3.984009 | 1.255550  |
| Mg19 | -1.813943 | -3.327203 | -2.425876 |
| Mg20 | 2.980347  | 1.103156  | 1.457520  |
| Mg21 | -4.968682 | -0.148688 | 0.598299  |

@mg21-isomer34 bp86/6-31G(d) Etot=-4201.934740 Eb=-14.08

|      |           |           |           |
|------|-----------|-----------|-----------|
| Mg1  | -1.930897 | 0.960935  | 1.465355  |
| Mg2  | 1.475607  | 0.983388  | 1.085582  |
| Mg3  | 0.913669  | -1.195926 | -1.770535 |
| Mg4  | 4.256181  | 2.425021  | 0.278303  |
| Mg5  | 1.591763  | 1.864418  | -1.795902 |
| Mg6  | -0.557069 | 3.300133  | -0.198696 |
| Mg7  | -1.467661 | 0.735069  | -1.612328 |
| Mg8  | 0.059271  | -1.039475 | 2.797750  |
| Mg9  | -3.706222 | 2.653098  | -0.344561 |
| Mg10 | 4.181208  | -0.113217 | 2.008573  |
| Mg11 | 3.888251  | -0.184699 | -1.245529 |
| Mg12 | -4.426283 | -2.299497 | 0.014798  |
| Mg13 | -3.165996 | -1.577345 | 2.665856  |
| Mg14 | 3.261246  | -3.112248 | -1.929896 |
| Mg15 | -2.636898 | -1.869492 | -2.492868 |
| Mg16 | -5.025950 | 0.384516  | 1.304498  |
| Mg17 | 2.037744  | -2.176177 | 0.890054  |
| Mg18 | -4.714259 | 0.203381  | -1.757095 |
| Mg19 | 5.123020  | -2.489141 | 0.353605  |
| Mg20 | 2.162258  | 4.509015  | 0.083655  |
| Mg21 | -1.318984 | -1.961757 | 0.199381  |

@mg21-isomer35 bp86/6-31G(d) Etot=-4201.932840 Eb=-14.02

|      |           |           |           |
|------|-----------|-----------|-----------|
| Mg1  | 1.635657  | -1.866072 | -0.998873 |
| Mg2  | -1.517343 | 0.209971  | 2.743562  |
| Mg3  | -0.783035 | 0.070363  | -0.231014 |
| Mg4  | 1.968767  | 1.219099  | -0.844503 |
| Mg5  | 0.286889  | 2.531522  | 1.611662  |
| Mg6  | 4.609125  | -2.923579 | -0.699669 |
| Mg7  | -4.603149 | 0.335312  | 2.347673  |
| Mg8  | -3.329061 | -1.829890 | 0.644712  |
| Mg9  | -1.428184 | -2.443392 | -1.737835 |
| Mg10 | -3.015307 | 2.166350  | 0.438846  |
| Mg11 | -0.621883 | 2.947251  | -1.414381 |
| Mg12 | 4.419294  | -0.201580 | -2.045293 |
| Mg13 | -5.280849 | 0.346919  | -0.622434 |
| Mg14 | -0.333560 | -2.613907 | 1.276955  |
| Mg15 | -2.796666 | 0.787274  | -2.386575 |
| Mg16 | 1.995817  | 4.175324  | -0.255293 |
| Mg17 | 1.443041  | -0.190344 | 2.047337  |
| Mg18 | 2.675335  | -2.979411 | 1.736641  |
| Mg19 | 4.346104  | -0.375687 | 0.991992  |
| Mg20 | -4.285329 | -1.884569 | -2.367520 |
| Mg21 | 4.614336  | 2.519046  | -0.235991 |

@mg21-isomer36 bp86/6-31G(d) Etot=-4201.929553 Eb=-13.92

|      |           |           |           |
|------|-----------|-----------|-----------|
| Mg1  | -0.428028 | 0.272467  | -1.239725 |
| Mg2  | -3.063586 | -1.053292 | 0.944200  |
| Mg3  | 1.540893  | 2.798489  | -0.575530 |
| Mg4  | -2.008829 | -2.483814 | -1.556546 |
| Mg5  | 1.728151  | -0.396385 | 0.798387  |
| Mg6  | 1.107383  | -2.429929 | -1.567136 |
| Mg7  | 0.918883  | -1.848226 | 3.453100  |
| Mg8  | 1.937342  | 2.114068  | 2.506716  |
| Mg9  | 2.263539  | -3.371172 | 1.196423  |
| Mg10 | -5.598057 | 0.769444  | 0.010134  |
| Mg11 | 2.362754  | 0.456410  | -2.350084 |

|      |           |           |           |
|------|-----------|-----------|-----------|
| Mg12 | -1.239798 | 3.185428  | -1.536254 |
| Mg13 | -5.064126 | -1.947654 | -1.192974 |
| Mg14 | -2.833133 | 1.994586  | 0.717433  |
| Mg15 | -0.717449 | 0.535744  | 2.360028  |
| Mg16 | 4.201638  | 1.440140  | 0.330329  |
| Mg17 | -0.434211 | 3.636001  | 1.564611  |
| Mg18 | 5.329045  | 0.440825  | -2.317161 |
| Mg19 | -3.296370 | 0.627289  | -2.028658 |
| Mg20 | -0.729382 | -2.917596 | 1.233032  |
| Mg21 | 4.023344  | -1.822823 | -0.750324 |

@mg21-isomer37 bp86/6-31G(d) Etot=-4201.918604 Eb=-13.60

|      |           |           |           |
|------|-----------|-----------|-----------|
| Mg1  | 0.323746  | -0.381640 | -2.658373 |
| Mg2  | -0.242650 | 0.154010  | 0.403216  |
| Mg3  | -2.010931 | -1.799239 | 2.010554  |
| Mg4  | -2.353595 | 1.121494  | -1.551818 |
| Mg5  | -1.835972 | -1.929190 | -1.200214 |
| Mg6  | 1.281973  | -2.371179 | -0.473135 |
| Mg7  | 2.169109  | 1.347362  | 1.794444  |
| Mg8  | -3.867993 | -3.620459 | 0.131026  |
| Mg9  | -0.372339 | 3.161639  | 0.561364  |
| Mg10 | -3.159856 | 3.939043  | 0.040593  |
| Mg11 | 1.165916  | -1.519713 | 2.494317  |
| Mg12 | 3.261394  | -0.608315 | -2.110432 |
| Mg13 | 6.238531  | -0.687748 | -1.361874 |
| Mg14 | -4.612042 | -1.003532 | -1.803993 |
| Mg15 | -2.763842 | 1.260607  | 1.756030  |
| Mg16 | 3.771132  | -1.209949 | 0.933563  |
| Mg17 | 1.739636  | 1.928114  | -1.237767 |
| Mg18 | -4.782510 | -0.935783 | 1.245807  |
| Mg19 | -5.159277 | 1.590174  | -0.271055 |
| Mg20 | 4.652351  | 1.596034  | -0.205168 |
| Mg21 | 6.557220  | -0.031729 | 1.502915  |

@mg21-isomer38 bp86/6-31G(d) Etot=-4201.918173 Eb=-13.58

|      |           |           |           |
|------|-----------|-----------|-----------|
| Mg1  | 0.173985  | 0.013054  | -2.295980 |
| Mg2  | -1.554760 | 0.524111  | 0.525778  |
| Mg3  | 3.070705  | -0.028886 | -1.567073 |
| Mg4  | -4.021628 | -1.418265 | 0.006735  |
| Mg5  | 1.720422  | -2.575349 | -1.972659 |
| Mg6  | 3.680362  | -2.272647 | 0.420204  |
| Mg7  | -4.901054 | 1.488025  | -1.436102 |
| Mg8  | 5.874771  | -0.043682 | -0.238689 |
| Mg9  | -2.054468 | 2.605964  | -1.511116 |
| Mg10 | 1.111452  | 2.023475  | -0.204120 |
| Mg11 | 3.568018  | 0.779508  | 1.747715  |
| Mg12 | 6.227234  | 2.330720  | 1.629659  |
| Mg13 | 0.882954  | -3.682984 | 0.890901  |
| Mg14 | 4.252902  | 2.738617  | -0.646261 |
| Mg15 | -3.653699 | -0.021087 | 2.778755  |
| Mg16 | 1.081717  | -0.762993 | 1.190262  |
| Mg17 | -1.545100 | -2.151741 | 1.976332  |
| Mg18 | -2.863717 | -0.334412 | -2.578788 |
| Mg19 | -6.105407 | 0.604231  | 1.243386  |
| Mg20 | -3.746050 | 2.617401  | 1.122036  |
| Mg21 | -1.198640 | -2.433061 | -1.080975 |

@mg21-isomer39 bp86/6-31G(d) Etot=-4201.909859 Eb=-13.33

|     |           |           |           |
|-----|-----------|-----------|-----------|
| Mg1 | -2.808814 | -0.582412 | 0.352850  |
| Mg2 | -0.045904 | 0.775117  | -0.417510 |
| Mg3 | 0.893222  | -4.017903 | 0.664615  |
| Mg4 | -0.242995 | -1.515872 | 1.826759  |
| Mg5 | -2.456634 | 2.948591  | 0.097299  |
| Mg6 | -5.575494 | -0.211889 | -1.122045 |

|      |           |           |           |
|------|-----------|-----------|-----------|
| Mg7  | -3.503465 | -2.352429 | -1.989069 |
| Mg8  | 4.664832  | 0.136235  | -2.182623 |
| Mg9  | -5.176222 | 2.729520  | -1.249645 |
| Mg10 | 2.532390  | -1.672234 | -0.627749 |
| Mg11 | -4.819705 | 1.462744  | 1.523006  |
| Mg12 | 4.784392  | -0.134997 | 0.841284  |
| Mg13 | 2.001188  | 0.798936  | 1.908884  |
| Mg14 | 5.963610  | 2.394737  | -0.644130 |
| Mg15 | 1.642422  | 0.135747  | -2.814888 |
| Mg16 | -1.461066 | 1.275726  | 2.361672  |
| Mg17 | 2.849972  | 2.200727  | -0.692499 |
| Mg18 | -0.435730 | -2.025619 | -1.542809 |
| Mg19 | 0.499753  | 3.404379  | 1.021252  |
| Mg20 | 2.838468  | -2.118930 | 2.227493  |
| Mg21 | -2.144222 | -3.630176 | 0.457853  |

@mg22-isomer01 bp86/6-31G(d) Etot=-4402.087956 Eb=-15.82

|      |           |           |           |
|------|-----------|-----------|-----------|
| Mg1  | -0.513652 | -0.008016 | -0.171898 |
| Mg2  | 2.200145  | -0.382779 | 1.406166  |
| Mg3  | -0.384133 | 0.416361  | 2.977123  |
| Mg4  | 1.763182  | 2.479251  | 1.982681  |
| Mg5  | -1.184687 | 2.781730  | 1.206849  |
| Mg6  | -0.547280 | -2.214094 | -3.080480 |
| Mg7  | -0.203167 | -3.077366 | -0.140530 |
| Mg8  | 0.558697  | -2.565929 | 2.749614  |
| Mg9  | 0.980625  | 4.347093  | -0.215469 |
| Mg10 | 1.986248  | -1.450654 | -1.594111 |
| Mg11 | -2.247460 | -1.869026 | 1.905021  |
| Mg12 | -2.879310 | -1.877821 | -1.070147 |
| Mg13 | 5.018185  | -1.320310 | -0.205493 |
| Mg14 | -4.974676 | -0.800454 | 0.860101  |
| Mg15 | 2.002917  | 1.580627  | -1.076910 |
| Mg16 | -0.803160 | 2.568362  | -1.927764 |
| Mg17 | 4.706892  | 1.550463  | 0.611426  |
| Mg18 | 0.691473  | 0.471476  | -3.638852 |
| Mg19 | -3.339018 | 1.342226  | -0.524562 |
| Mg20 | 2.764214  | -3.260761 | 0.720258  |
| Mg21 | -3.340341 | 1.059702  | 2.495519  |
| Mg22 | -2.255695 | 0.229920  | -3.268541 |

@mg22-isomer02 bp86/6-31G(d) Etot=-4402.087345 Eb=-15.80

|      |           |           |           |
|------|-----------|-----------|-----------|
| Mg1  | -1.592319 | 2.963478  | 0.697065  |
| Mg2  | 0.757244  | -2.195073 | -1.846272 |
| Mg3  | -0.700393 | 0.983442  | 3.003798  |
| Mg4  | 0.964765  | 0.864852  | -2.749531 |
| Mg5  | 0.415617  | 3.546815  | -1.503839 |
| Mg6  | -0.503922 | -0.052585 | 0.080462  |
| Mg7  | -1.975887 | 1.726809  | -2.103168 |
| Mg8  | -1.297584 | -3.081626 | 0.357855  |
| Mg9  | 1.707718  | -2.855136 | 1.081475  |
| Mg10 | -1.324752 | -0.804735 | -3.712558 |
| Mg11 | -0.416398 | -2.024100 | 3.056764  |
| Mg12 | -1.842143 | -3.548260 | -2.603018 |
| Mg13 | 1.393662  | 2.192629  | 1.045004  |
| Mg14 | -3.584150 | 1.869533  | 2.850797  |
| Mg15 | -4.173485 | 1.387120  | -0.009113 |
| Mg16 | 2.568976  | -0.269417 | -0.374558 |
| Mg17 | 2.060645  | -0.368537 | 2.694855  |
| Mg18 | 3.255862  | 2.475655  | -1.453167 |
| Mg19 | -3.204540 | -1.155722 | -1.274493 |
| Mg20 | 5.654062  | 0.685063  | -0.545117 |
| Mg21 | -3.007144 | -0.912352 | 1.809305  |
| Mg22 | 4.844165  | -1.427854 | 1.497453  |

@mg22-isomer03 bp86/6-31G(d) Etot=-4402.086815 Eb=-15.79

|      |           |           |           |
|------|-----------|-----------|-----------|
| Mg1  | 0.303716  | -3.347116 | -0.099312 |
| Mg2  | 2.348267  | -0.005054 | -3.243142 |
| Mg3  | -1.962296 | -1.580495 | 1.152727  |
| Mg4  | -2.504804 | 3.117181  | -1.361665 |
| Mg5  | -2.396864 | 0.001152  | -1.504156 |
| Mg6  | 4.436686  | -0.003226 | -1.000004 |
| Mg7  | -4.989624 | -1.475072 | -0.106111 |
| Mg8  | -0.919618 | 0.004381  | 3.506161  |
| Mg9  | 0.552658  | -0.004403 | 0.048282  |
| Mg10 | 0.311990  | 3.343782  | -0.105029 |
| Mg11 | 2.739374  | -2.472489 | -1.656471 |
| Mg12 | 2.045274  | 0.001610  | 3.626930  |
| Mg13 | -0.086444 | -1.650457 | -2.547988 |
| Mg14 | 0.513253  | 2.504052  | 2.763723  |
| Mg15 | -1.954881 | 1.585379  | 1.147501  |
| Mg16 | 0.510977  | -2.497514 | 2.763744  |
| Mg17 | 2.744960  | 2.464816  | -1.665165 |
| Mg18 | -4.985791 | 1.481272  | -0.108915 |
| Mg19 | 2.942222  | 1.609813  | 1.144689  |
| Mg20 | 2.945988  | -1.607987 | 1.149877  |
| Mg21 | -0.081956 | 1.645074  | -2.550850 |
| Mg22 | -2.513086 | -3.114700 | -1.354827 |

@mg22-isomer04 bp86/6-31G(d) Etot=-4402.086250 Eb=-15.77

|      |           |           |           |
|------|-----------|-----------|-----------|
| Mg1  | -2.605316 | -3.451683 | 0.016126  |
| Mg2  | 0.125923  | -3.662187 | -1.235992 |
| Mg3  | -0.000288 | -2.589987 | 1.613508  |
| Mg4  | 2.642329  | -2.482221 | -0.028706 |
| Mg5  | 1.309411  | -1.269033 | -2.665074 |
| Mg6  | -1.749593 | -1.319300 | -1.902676 |
| Mg7  | 2.227826  | -0.637560 | 2.574581  |
| Mg8  | 4.925160  | -0.695874 | 1.131830  |
| Mg9  | -4.865862 | -1.227829 | -0.613117 |
| Mg10 | -2.335541 | -0.684410 | 1.198508  |
| Mg11 | 4.003112  | -0.329282 | -1.606096 |
| Mg12 | 0.463909  | 0.051357  | 0.089718  |
| Mg13 | -0.650766 | 0.874472  | -3.635919 |
| Mg14 | -2.047989 | 1.604370  | -0.897854 |
| Mg15 | -4.833391 | 1.343030  | 1.069054  |
| Mg16 | -0.625035 | -0.201156 | 3.602456  |
| Mg17 | 1.886501  | 1.815339  | -2.181218 |
| Mg18 | 3.091186  | 1.695596  | 0.692735  |
| Mg19 | 1.033017  | 2.161950  | 2.998566  |
| Mg20 | -0.509084 | 3.656683  | -2.607326 |
| Mg21 | -1.869251 | 2.183955  | 2.141736  |
| Mg22 | 0.383740  | 3.163769  | 0.245160  |

@mg22-isomer05 bp86/6-31G(d) Etot=-4402.083745 Eb=-15.70

|      |           |           |           |
|------|-----------|-----------|-----------|
| Mg1  | -0.750731 | 1.657748  | -2.729319 |
| Mg2  | 0.004246  | -2.514488 | 1.741264  |
| Mg3  | -0.128758 | 3.174525  | -0.096453 |
| Mg4  | 0.936289  | -2.425915 | -1.264894 |
| Mg5  | 1.050083  | -0.609808 | -3.687806 |
| Mg6  | -0.613656 | 0.124252  | 0.166072  |
| Mg7  | -1.667704 | -1.297962 | -2.523006 |
| Mg8  | -2.159865 | -0.420057 | 2.813133  |
| Mg9  | 0.822647  | -0.104359 | 3.462857  |
| Mg10 | -1.719423 | -3.642889 | -0.582867 |
| Mg11 | -0.787308 | 2.330093  | 2.698752  |
| Mg12 | -2.900968 | -3.282844 | 2.183536  |
| Mg13 | 1.890744  | 1.120045  | -1.209564 |
| Mg14 | -2.750949 | 3.698689  | -1.444350 |
| Mg15 | -3.683731 | 0.922558  | -2.087802 |

|      |           |           |           |
|------|-----------|-----------|-----------|
| Mg16 | 2.485013  | -0.877218 | 0.950000  |
| Mg17 | 2.057574  | 2.097457  | 1.831584  |
| Mg18 | 3.569555  | -1.288803 | -2.152788 |
| Mg19 | -3.547167 | -1.185559 | 0.052079  |
| Mg20 | 6.020931  | -0.499394 | -0.588013 |
| Mg21 | -3.150398 | 1.805230  | 0.847399  |
| Mg22 | 5.023576  | 1.218699  | 1.620186  |

@mg22-isomer06 bp86/6-31G(d) Etot=-4402.079507 Eb=-15.58

|      |           |           |           |
|------|-----------|-----------|-----------|
| Mg1  | 0.679279  | 0.021695  | -0.115351 |
| Mg2  | -1.698044 | 1.635189  | -1.764130 |
| Mg3  | 1.119188  | 2.724819  | -1.436165 |
| Mg4  | -1.225857 | 3.864262  | 0.175331  |
| Mg5  | 0.981520  | 2.502776  | 1.748277  |
| Mg6  | -0.232980 | -2.955744 | -0.293435 |
| Mg7  | 1.129855  | -2.069450 | -2.883208 |
| Mg8  | 0.312563  | 0.627429  | -3.782863 |
| Mg9  | -1.902931 | 2.196459  | 2.530597  |
| Mg10 | -3.295697 | -2.931893 | -0.292621 |
| Mg11 | 2.981219  | 0.274266  | -2.194499 |
| Mg12 | 2.775421  | -2.206587 | -0.280291 |
| Mg13 | -5.090872 | -0.530795 | -0.543412 |
| Mg14 | 5.103065  | -0.390810 | 0.223171  |
| Mg15 | -2.105596 | -0.251193 | 0.680194  |
| Mg16 | -0.078550 | -0.121823 | 3.047129  |
| Mg17 | -4.023410 | 2.164427  | 0.189885  |
| Mg18 | -1.618869 | -2.731443 | 2.410748  |
| Mg19 | 2.904425  | -0.001626 | 2.349511  |
| Mg20 | -1.712093 | -1.281917 | -2.394201 |
| Mg21 | 3.626050  | 2.155700  | 0.283603  |
| Mg22 | 1.372313  | -2.693743 | 2.341730  |

@mg22-isomer07 bp86/6-31G(d) Etot=-4402.078828 Eb=-15.56

|      |           |           |           |
|------|-----------|-----------|-----------|
| Mg1  | -0.492671 | 0.000218  | -0.084448 |
| Mg2  | -2.617774 | -2.123836 | -1.101348 |
| Mg3  | 0.053899  | -2.427246 | -2.662187 |
| Mg4  | -1.777098 | 2.072217  | 1.897211  |
| Mg5  | -0.259650 | 3.738341  | -0.096680 |
| Mg6  | 0.051718  | 2.415370  | -2.673757 |
| Mg7  | 1.770184  | -0.004674 | -2.128001 |
| Mg8  | 2.473856  | -2.681818 | -0.735706 |
| Mg9  | -1.620945 | -0.007302 | -3.199882 |
| Mg10 | -1.774263 | -2.064272 | 1.905566  |
| Mg11 | -3.738929 | 0.000289  | 0.798873  |
| Mg12 | -2.618913 | 2.118326  | -1.110038 |
| Mg13 | 5.275838  | 1.516051  | -0.031794 |
| Mg14 | -4.497441 | -0.005717 | -2.143320 |
| Mg15 | -0.257219 | -3.739781 | -0.080348 |
| Mg16 | 0.156686  | 0.008414  | 3.271395  |
| Mg17 | 5.278254  | -1.512338 | -0.036413 |
| Mg18 | -2.806434 | 0.007751  | 3.867697  |
| Mg19 | 2.470897  | 2.678549  | -0.748124 |
| Mg20 | 1.271958  | 2.550406  | 2.101037  |
| Mg21 | 1.272643  | -2.540901 | 2.112527  |
| Mg22 | 2.385402  | 0.001953  | 0.877738  |

@mg22-isomer08 bp86/6-31G(d) Etot=-4402.077009 Eb=-15.51

|     |           |           |           |
|-----|-----------|-----------|-----------|
| Mg1 | 0.817818  | -0.004090 | -0.186688 |
| Mg2 | 0.826385  | -0.645684 | 3.455454  |
| Mg3 | -0.894498 | 1.286072  | 2.032841  |
| Mg4 | -2.858293 | 2.856780  | 0.403792  |
| Mg5 | -3.613423 | -0.013441 | 2.079119  |
| Mg6 | 0.112605  | 3.849115  | 0.945582  |
| Mg7 | -1.393042 | -2.558964 | -1.729628 |

|      |           |           |           |
|------|-----------|-----------|-----------|
| Mg8  | -0.442541 | 2.477606  | -1.696866 |
| Mg9  | -2.157186 | 0.201507  | -0.816713 |
| Mg10 | 1.215163  | -2.033675 | -3.191897 |
| Mg11 | 1.820337  | 0.963215  | -3.115121 |
| Mg12 | -1.242466 | -1.930766 | 1.302260  |
| Mg13 | -0.992542 | -0.076662 | -3.543387 |
| Mg14 | 1.282955  | -3.011004 | -0.307291 |
| Mg15 | 2.146637  | 1.807294  | 2.108189  |
| Mg16 | 1.073564  | -3.471941 | 2.651682  |
| Mg17 | 2.483944  | 2.802928  | -0.714166 |
| Mg18 | 3.173419  | -1.268909 | 1.656090  |
| Mg19 | -4.258203 | -2.095475 | -0.218686 |
| Mg20 | 3.499629  | -1.063280 | -1.288526 |
| Mg21 | 4.706498  | 1.137705  | 0.443995  |
| Mg22 | -5.306761 | 0.791668  | -0.270033 |

@mg22-isomer09 bp86/6-31G(d) Etot=-4402.078301 Eb=-15.54

|      |           |           |           |
|------|-----------|-----------|-----------|
| Mg1  | -0.037006 | -0.136730 | -0.084691 |
| Mg2  | -0.673928 | 1.102657  | 2.783573  |
| Mg3  | -3.440611 | 1.875134  | 1.639030  |
| Mg4  | 2.164031  | -0.008101 | 2.095445  |
| Mg5  | -0.936805 | 2.999476  | 0.450730  |
| Mg6  | -0.798401 | 2.854090  | -2.584030 |
| Mg7  | -3.013721 | -0.873537 | 3.029189  |
| Mg8  | 1.753176  | 2.538966  | -0.944953 |
| Mg9  | -2.772065 | 0.789797  | -1.109310 |
| Mg10 | -1.395448 | -1.813451 | -2.355244 |
| Mg11 | -0.226882 | -2.027896 | 2.318470  |
| Mg12 | -2.657655 | -2.141691 | 0.354816  |
| Mg13 | -0.217295 | -3.818196 | -0.129385 |
| Mg14 | 1.510503  | -2.590796 | -2.190693 |
| Mg15 | 2.421047  | -2.725226 | 0.794249  |
| Mg16 | 4.397753  | 1.906653  | 0.709578  |
| Mg17 | -5.081691 | -0.443330 | 0.766648  |
| Mg18 | -1.860143 | 0.571874  | -4.190796 |
| Mg19 | 3.011074  | -0.213362 | -1.010665 |
| Mg20 | 5.247504  | -1.119218 | 0.746869  |
| Mg21 | 1.712653  | 2.951127  | 2.033435  |
| Mg22 | 0.893910  | 0.321760  | -3.122263 |

@mg22-isomer10 bp86/6-31G(d) Etot=-4402.076253 Eb=-15.49

|      |           |           |           |
|------|-----------|-----------|-----------|
| Mg1  | 2.789219  | 0.146400  | 2.713959  |
| Mg2  | -2.270116 | -1.409802 | 2.301321  |
| Mg3  | 5.007585  | -0.657060 | 0.240945  |
| Mg4  | -3.222077 | 1.588625  | 2.174115  |
| Mg5  | 1.492260  | 0.774951  | -3.104704 |
| Mg6  | -3.875697 | 2.152968  | -0.768849 |
| Mg7  | -2.926258 | -2.492806 | -0.775439 |
| Mg8  | 1.860756  | 2.764536  | 1.390872  |
| Mg9  | -1.236567 | 2.057047  | -2.526434 |
| Mg10 | -0.279178 | 0.936544  | 2.681141  |
| Mg11 | 3.954621  | 1.823259  | -0.844315 |
| Mg12 | 1.297323  | 3.340044  | -1.524762 |
| Mg13 | -1.049752 | 3.040613  | 0.377678  |
| Mg14 | 0.639494  | -1.874950 | 3.250583  |
| Mg15 | -0.133886 | -2.631095 | 0.443498  |
| Mg16 | -0.961728 | -0.996040 | -3.037270 |
| Mg17 | -4.798542 | -0.424242 | 0.511841  |
| Mg18 | 1.319555  | 0.171295  | -0.045704 |
| Mg19 | 1.799162  | -2.096690 | -1.936482 |
| Mg20 | -0.609486 | -3.871998 | -2.311901 |
| Mg21 | -1.572697 | 0.105175  | -0.240345 |
| Mg22 | 2.776007  | -2.446776 | 1.030253  |



@mg22-isomer11 bp86/6-31G(d) Etot=-4402.074804 Eb=-15.44

|      |           |           |           |
|------|-----------|-----------|-----------|
| Mg1  | 5.129485  | -1.628579 | 0.125383  |
| Mg2  | 3.282458  | 1.437596  | 0.364092  |
| Mg3  | 2.412344  | -1.239039 | 1.881386  |
| Mg4  | 6.382812  | 1.205634  | 0.020397  |
| Mg5  | 1.410257  | 1.411146  | 2.708336  |
| Mg6  | 2.167794  | -1.107177 | -1.131429 |
| Mg7  | 0.233362  | -3.065693 | 0.960449  |
| Mg8  | -0.521987 | -0.869272 | 2.980019  |
| Mg9  | 0.885457  | 3.428529  | 0.656125  |
| Mg10 | 1.168325  | 1.753543  | -1.858319 |
| Mg11 | -0.019544 | -3.019516 | -2.006919 |
| Mg12 | 0.655290  | -0.615197 | -3.753439 |
| Mg13 | -2.379488 | -3.212402 | 2.597835  |
| Mg14 | -0.459157 | -0.022973 | -0.014282 |
| Mg15 | -1.484227 | 2.042785  | 2.137441  |
| Mg16 | -2.513738 | -2.377345 | -0.297973 |
| Mg17 | -3.353652 | -0.384488 | 1.877194  |
| Mg18 | -1.723357 | 3.092406  | -0.737535 |
| Mg19 | -2.186019 | -1.371452 | -3.150857 |
| Mg20 | -1.485663 | 1.511624  | -3.299935 |
| Mg21 | -3.349199 | 0.477293  | -1.048264 |
| Mg22 | -4.251553 | 2.552577  | 0.990298  |

@mg22-isomer12 bp86/6-31G(d) Etot=-4402.074108 Eb=-15.42

|      |           |           |           |
|------|-----------|-----------|-----------|
| Mg1  | -1.567128 | -0.188984 | 2.790349  |
| Mg2  | 3.624290  | -2.431383 | 0.739715  |
| Mg3  | -3.977148 | -1.591567 | 1.200767  |
| Mg4  | 0.729198  | 2.138190  | -1.798410 |
| Mg5  | 3.667990  | 0.150209  | 2.402620  |
| Mg6  | -1.433571 | -3.099430 | 1.834408  |
| Mg7  | 2.059596  | -0.505512 | -1.103057 |
| Mg8  | -4.082635 | 1.401523  | 1.361855  |
| Mg9  | -2.065271 | 2.577163  | -0.769795 |
| Mg10 | -0.042550 | -2.044022 | -3.012513 |
| Mg11 | -3.835356 | 0.069816  | -1.244028 |
| Mg12 | 3.301100  | 2.298370  | 0.012878  |
| Mg13 | 0.770928  | -3.191684 | -0.281927 |
| Mg14 | -1.562797 | 0.626773  | -3.251235 |
| Mg15 | 0.487912  | 4.047918  | 0.451112  |
| Mg16 | 1.157448  | -1.736747 | 2.306407  |
| Mg17 | -1.577967 | 2.836942  | 2.251102  |
| Mg18 | -2.269478 | -2.751188 | -1.118795 |
| Mg19 | -0.857599 | -0.267524 | -0.184758 |
| Mg20 | 0.943171  | 1.285986  | 1.607829  |
| Mg21 | 1.251629  | 0.348321  | -4.127649 |
| Mg22 | 5.278238  | 0.026831  | -0.066875 |

@mg22-isomer13 bp86/6-31G(d) Etot=-4402.072442 Eb=-15.38

|      |           |           |           |
|------|-----------|-----------|-----------|
| Mg1  | 0.106471  | -2.451748 | -2.030588 |
| Mg2  | 5.080641  | -0.823711 | 0.663443  |
| Mg3  | -2.659689 | -2.442868 | -0.690677 |
| Mg4  | -1.193621 | 3.707337  | 0.083114  |
| Mg5  | 4.460213  | -1.059198 | -2.241777 |
| Mg6  | -0.246577 | -3.611163 | 0.645578  |
| Mg7  | 2.096264  | 0.491341  | 1.350408  |
| Mg8  | -4.700709 | -0.661725 | -2.089880 |
| Mg9  | -3.168060 | 1.695655  | -1.020790 |
| Mg10 | -0.124431 | 0.328163  | 3.756830  |
| Mg11 | -4.262535 | -0.436765 | 0.820196  |
| Mg12 | 1.676030  | 2.955930  | -0.473378 |
| Mg13 | 1.147424  | -2.106370 | 2.728161  |
| Mg14 | -2.349565 | 1.622687  | 2.031064  |
| Mg15 | -0.518060 | 2.324710  | -2.444297 |

|      |           |           |           |
|------|-----------|-----------|-----------|
| Mg16 | 2.377289  | -2.262489 | -0.070442 |
| Mg17 | -1.790554 | -0.338925 | -2.979094 |
| Mg18 | -1.937037 | -1.757375 | 2.372519  |
| Mg19 | -0.631232 | -0.036821 | 0.030781  |
| Mg20 | 1.662011  | 0.283179  | -1.960684 |
| Mg21 | 0.467564  | 2.889802  | 2.384232  |
| Mg22 | 4.508164  | 1.690355  | -0.864721 |

@mg22-isomer14 bp86/6-31G(d) Etot=-4402.071630 Eb=-15.35

|      |           |           |           |
|------|-----------|-----------|-----------|
| Mg1  | 4.250363  | 3.817977  | -0.236103 |
| Mg2  | 1.113905  | 2.550102  | -0.411530 |
| Mg3  | -0.784999 | 3.318958  | 1.892640  |
| Mg4  | -2.018562 | 2.583266  | -0.815054 |
| Mg5  | -0.174946 | 2.137893  | -3.162999 |
| Mg6  | 3.422269  | 0.610477  | 0.232370  |
| Mg7  | 1.231680  | 1.102972  | 2.364255  |
| Mg8  | -1.818985 | 0.571726  | 2.732580  |
| Mg9  | -3.632611 | 0.153449  | 0.270719  |
| Mg10 | 1.791875  | -0.028149 | -2.211056 |
| Mg11 | -3.805963 | 2.823427  | 1.661082  |
| Mg12 | -0.507518 | -0.171919 | 0.022233  |
| Mg13 | -2.290956 | -0.066702 | -2.495522 |
| Mg14 | 3.176813  | -1.258965 | 2.575777  |
| Mg15 | -0.081512 | -0.506336 | -4.561598 |
| Mg16 | 5.048581  | -2.366059 | 0.211144  |
| Mg17 | 0.169296  | -1.816240 | 2.590129  |
| Mg18 | -2.807917 | -2.274325 | 2.010446  |
| Mg19 | 1.819772  | -2.238457 | -0.005973 |
| Mg20 | -0.286650 | -2.425907 | -2.210852 |
| Mg21 | -3.062423 | -2.655481 | -0.950659 |
| Mg22 | -0.751514 | -3.861705 | 0.497971  |

@mg22-isomer15 bp86/6-31G(d) Etot=-4402.069879 Eb=-15.30

|      |           |           |           |
|------|-----------|-----------|-----------|
| Mg1  | -1.669508 | -2.621776 | 1.928248  |
| Mg2  | 1.470743  | 0.042573  | -4.247267 |
| Mg3  | -2.015898 | 2.592222  | -1.178968 |
| Mg4  | 3.371059  | 0.032587  | -1.832355 |
| Mg5  | -4.251634 | -1.567532 | 0.679894  |
| Mg6  | -0.526615 | -0.024491 | 3.224503  |
| Mg7  | 0.888228  | -1.720970 | -1.750580 |
| Mg8  | -1.989893 | -2.592936 | -1.213635 |
| Mg9  | 0.476010  | -3.778893 | 0.278706  |
| Mg10 | -1.348179 | 0.013490  | -3.057212 |
| Mg11 | -4.277482 | 1.535830  | 0.687281  |
| Mg12 | 1.282375  | -2.459207 | 2.800754  |
| Mg13 | 0.862035  | 1.742702  | -1.705121 |
| Mg14 | 3.207181  | 2.471241  | 0.230047  |
| Mg15 | 0.436578  | 3.799428  | 0.327696  |
| Mg16 | 4.995503  | 0.014659  | 0.626390  |
| Mg17 | -4.032172 | -0.008064 | -1.855096 |
| Mg18 | 3.243989  | -2.454012 | 0.191180  |
| Mg19 | 1.575785  | -0.012125 | 0.914214  |
| Mg20 | -1.262092 | -0.007970 | 0.176553  |
| Mg21 | 1.258283  | 2.425683  | 2.818010  |
| Mg22 | -1.694297 | 2.577561  | 1.956757  |

@mg22-isomer16 bp86/6-31G(d) Etot=-4402.068387 Eb=-15.26

|     |           |           |           |
|-----|-----------|-----------|-----------|
| Mg1 | 0.662923  | -2.430861 | 1.546676  |
| Mg2 | -2.494462 | -2.350033 | -2.284397 |
| Mg3 | -1.163642 | -0.056824 | 0.005170  |
| Mg4 | 3.319924  | -0.956412 | 2.139391  |
| Mg5 | -3.546457 | 0.587273  | -1.753663 |
| Mg6 | 5.729675  | 0.650940  | 0.991349  |
| Mg7 | -2.131180 | -1.265923 | 2.543916  |

|      |           |           |           |
|------|-----------|-----------|-----------|
| Mg8  | -4.401337 | 0.916965  | 1.396224  |
| Mg9  | -0.009175 | 2.891493  | 0.488303  |
| Mg10 | -1.810300 | -3.650296 | 0.489970  |
| Mg11 | -1.317725 | 2.635915  | -2.301393 |
| Mg12 | -3.062630 | 3.177273  | 0.051812  |
| Mg13 | 2.783385  | 1.898987  | 0.850774  |
| Mg14 | -0.357459 | -0.302945 | -2.913630 |
| Mg15 | -1.970612 | 2.015375  | 2.645489  |
| Mg16 | 1.601477  | 2.043705  | -2.058758 |
| Mg17 | 1.853372  | -0.659472 | -0.685299 |
| Mg18 | 4.496478  | 0.911035  | -1.785447 |
| Mg19 | -4.069846 | -1.722971 | 0.159372  |
| Mg20 | 0.264832  | -3.049389 | -1.545017 |
| Mg21 | 4.955041  | -1.806442 | -0.472712 |
| Mg22 | 0.667717  | 0.522608  | 2.491869  |

@mg22-isomer17 bp86/6-31G(d) Etot=-4402.063020 Eb=-15.11

|      |           |           |           |
|------|-----------|-----------|-----------|
| Mg1  | 0.471979  | -2.319988 | 2.114051  |
| Mg2  | -0.682925 | 0.640285  | 2.757733  |
| Mg3  | -2.451815 | -1.840555 | 2.467612  |
| Mg4  | 3.423957  | -2.755281 | 0.770649  |
| Mg5  | -1.433102 | 3.048809  | 0.911200  |
| Mg6  | -1.484821 | 2.371399  | -2.126576 |
| Mg7  | 3.972089  | 2.450498  | 0.970495  |
| Mg8  | -1.039573 | -0.184026 | -0.109431 |
| Mg9  | 5.157837  | -0.277333 | 0.258157  |
| Mg10 | -1.613055 | -3.800978 | 0.367921  |
| Mg11 | 0.938450  | 0.086234  | -2.338811 |
| Mg12 | 1.949814  | 0.051712  | 0.798109  |
| Mg13 | -1.885464 | -2.181592 | -2.190165 |
| Mg14 | 3.640461  | 1.386969  | -1.751730 |
| Mg15 | -4.085649 | 3.087143  | -0.732392 |
| Mg16 | -4.126330 | -2.048865 | -0.079644 |
| Mg17 | 1.228588  | 2.897090  | 2.347530  |
| Mg18 | -3.811454 | 0.323986  | -1.931617 |
| Mg19 | 1.140573  | 2.786290  | -0.717006 |
| Mg20 | 3.512450  | -1.675199 | -1.990051 |
| Mg21 | -3.681637 | 0.732492  | 1.169292  |
| Mg22 | 0.859625  | -2.779090 | -0.965325 |

@mg22-isomer18 bp86/6-31G(d) Etot=-4402.061796 Eb=-15.07

|      |           |           |           |
|------|-----------|-----------|-----------|
| Mg1  | -1.216377 | 0.967146  | 2.768372  |
| Mg2  | 0.567268  | -1.931597 | 2.029400  |
| Mg3  | -2.475186 | -2.109571 | 2.226755  |
| Mg4  | -0.851801 | 1.340405  | -2.233444 |
| Mg5  | 0.415611  | 3.121870  | 1.332451  |
| Mg6  | -2.445834 | -1.528935 | -2.617975 |
| Mg7  | -4.342318 | 0.336642  | 1.568498  |
| Mg8  | -4.192950 | 0.738722  | -1.414047 |
| Mg9  | 4.304391  | 1.310942  | 0.404952  |
| Mg10 | 2.239204  | -2.760070 | -0.495887 |
| Mg11 | -4.294395 | -2.073385 | -0.268896 |
| Mg12 | -0.992010 | -3.211835 | -0.447632 |
| Mg13 | -0.520899 | 4.198194  | -1.311831 |
| Mg14 | 1.869549  | 1.013564  | 2.859854  |
| Mg15 | 1.296047  | 0.193939  | 0.016351  |
| Mg16 | 3.558968  | -1.299736 | 1.918623  |
| Mg17 | 2.018120  | 2.599957  | -1.446378 |
| Mg18 | -1.577880 | -0.329788 | 0.061316  |
| Mg19 | 0.537009  | -1.569529 | -2.595118 |
| Mg20 | 3.243095  | -0.224335 | -2.268011 |
| Mg21 | 5.307496  | -1.339798 | -0.491282 |
| Mg22 | -2.447108 | 2.557198  | 0.403929  |

@mg22-isomer19 bp86/6-31G(d) Etot=-4402.059200 Eb=-15.00

|      |           |           |           |
|------|-----------|-----------|-----------|
| Mg1  | 0.499176  | -3.136260 | 1.255040  |
| Mg2  | 1.734842  | -0.656817 | -3.048214 |
| Mg3  | -1.284263 | -1.342594 | 3.179768  |
| Mg4  | -2.278173 | 2.711832  | -1.517472 |
| Mg5  | -3.536693 | -0.596880 | -2.095714 |
| Mg6  | 4.563168  | -1.440027 | -1.813197 |
| Mg7  | -5.624562 | -1.489733 | 0.042720  |
| Mg8  | -0.098425 | 1.434250  | 3.411578  |
| Mg9  | 0.642730  | -0.164969 | 0.593608  |
| Mg10 | 2.735244  | 3.901253  | -0.166842 |
| Mg11 | 2.135638  | -3.110578 | -1.284890 |
| Mg12 | 2.565169  | 1.713591  | 2.022980  |
| Mg13 | -0.655674 | -2.727160 | -2.050122 |
| Mg14 | 0.007739  | 2.929919  | 0.626182  |
| Mg15 | -2.197667 | 0.992365  | 1.138038  |
| Mg16 | 1.602673  | -1.045122 | 3.564246  |
| Mg17 | 0.897858  | 2.584176  | -2.338643 |
| Mg18 | -5.067696 | 1.524439  | -0.181696 |
| Mg19 | 3.114052  | 1.040613  | -0.920491 |
| Mg20 | 3.294503  | -1.460408 | 1.006591  |
| Mg21 | -0.788313 | 0.221656  | -1.828959 |
| Mg22 | -2.261328 | -1.883546 | 0.405491  |

@mg22-isomer20 bp86/6-31G(d) Etot=-4402.055118 Eb=-14.88

|      |           |           |           |
|------|-----------|-----------|-----------|
| Mg1  | -0.132550 | 1.083265  | 2.620105  |
| Mg2  | 0.697676  | -1.918686 | 2.921975  |
| Mg3  | 0.047485  | -3.649775 | 0.489346  |
| Mg4  | -0.981935 | 3.310393  | 0.649164  |
| Mg5  | 1.918425  | -2.744560 | -1.699391 |
| Mg6  | 0.393732  | 2.624909  | -1.960382 |
| Mg7  | 1.936717  | 2.728213  | 0.800961  |
| Mg8  | 3.930811  | -0.605452 | -0.804809 |
| Mg9  | 0.801364  | -0.125431 | -0.067115 |
| Mg10 | 3.379916  | 2.174822  | -2.051204 |
| Mg11 | -1.024315 | -1.894280 | -1.855851 |
| Mg12 | 2.984898  | 0.095603  | 2.149302  |
| Mg13 | -1.832315 | -1.307738 | 1.218222  |
| Mg14 | 2.968602  | -2.840535 | 1.151183  |
| Mg15 | -2.894928 | -4.011631 | -0.432683 |
| Mg16 | -4.136909 | -1.479225 | -1.291913 |
| Mg17 | -3.056638 | 1.428541  | 1.944058  |
| Mg18 | 1.576497  | 0.021968  | -3.047480 |
| Mg19 | -5.426228 | 0.863208  | -0.066350 |
| Mg20 | -3.933494 | 3.444508  | -0.214293 |
| Mg21 | 4.840565  | 1.941280  | 0.589618  |
| Mg22 | -2.057375 | 0.860603  | -1.042461 |

@mg22-isomer21 bp86/6-31G(d) Etot=-4402.050093 Eb=-14.74

|      |           |           |           |
|------|-----------|-----------|-----------|
| Mg1  | -1.667349 | 1.750950  | 2.054990  |
| Mg2  | 2.009338  | 0.247371  | 0.458429  |
| Mg3  | -0.077797 | 3.776800  | 0.400966  |
| Mg4  | -2.506857 | -1.273714 | 2.607709  |
| Mg5  | 3.433548  | 1.071884  | -2.230567 |
| Mg6  | -4.181294 | 0.316165  | 0.703935  |
| Mg7  | 5.185715  | 1.109532  | 0.097345  |
| Mg8  | -2.398688 | 2.408087  | -0.959119 |
| Mg9  | 1.323505  | 2.322188  | 2.623827  |
| Mg10 | 1.254596  | -1.056036 | -2.347264 |
| Mg11 | -5.393718 | 1.909559  | -1.487372 |
| Mg12 | 0.518608  | 1.980903  | -1.869467 |
| Mg13 | -0.432893 | -3.128032 | 1.219330  |
| Mg14 | -3.485339 | -2.562316 | 0.031615  |
| Mg15 | 0.420458  | -0.627973 | 2.867573  |

|      |           |           |           |
|------|-----------|-----------|-----------|
| Mg16 | -0.903781 | -0.266850 | -0.179115 |
| Mg17 | 2.543787  | -2.507011 | 1.730423  |
| Mg18 | 1.715622  | -3.585975 | -0.881924 |
| Mg19 | 4.093347  | -1.651268 | -0.803846 |
| Mg20 | 2.887813  | 3.148968  | -0.060153 |
| Mg21 | -3.232136 | -0.423827 | -2.227331 |
| Mg22 | -1.106485 | -2.959406 | -1.749982 |

@mg22-isomer22 bp86/6-31G(d) Etot=-4402.046991 Eb=-14.65

|      |           |           |           |
|------|-----------|-----------|-----------|
| Mg1  | -4.818496 | -2.285286 | 0.515561  |
| Mg2  | -3.171670 | -1.520971 | -1.951991 |
| Mg3  | 0.122226  | -0.828690 | 2.236435  |
| Mg4  | -3.022345 | -0.154276 | 2.119257  |
| Mg5  | -2.790235 | 1.593577  | -2.264868 |
| Mg6  | 3.366922  | -1.326967 | 1.678769  |
| Mg7  | 4.544135  | 1.495211  | 0.723080  |
| Mg8  | -1.283786 | 0.086413  | -0.256581 |
| Mg9  | -3.379045 | 2.739481  | 0.854220  |
| Mg10 | -1.901898 | -2.929833 | 0.751734  |
| Mg11 | 1.003986  | -3.457307 | 0.911340  |
| Mg12 | 5.008182  | -0.925467 | -0.972625 |
| Mg13 | 0.355951  | 1.370641  | -2.423475 |
| Mg14 | -0.189638 | -2.526445 | -1.725750 |
| Mg15 | 1.703992  | -0.288247 | -0.464085 |
| Mg16 | 3.500222  | 1.400785  | -2.144976 |
| Mg17 | 1.889371  | 2.984248  | 0.060438  |
| Mg18 | 2.353699  | 1.354328  | 2.651445  |
| Mg19 | -4.870990 | 0.482523  | -0.338345 |
| Mg20 | 3.044216  | -3.099415 | -1.216173 |
| Mg21 | -0.950093 | 3.663223  | -0.666997 |
| Mg22 | -0.514705 | 2.172472  | 1.923587  |

@mg22-isomer23 bp86/6-31G(d) Etot=-4402.044991 Eb=-14.59

|      |           |           |           |
|------|-----------|-----------|-----------|
| Mg1  | 3.297512  | -2.937488 | 2.089228  |
| Mg2  | -4.528559 | -1.864544 | -0.760956 |
| Mg3  | -1.107547 | -0.519366 | 1.743258  |
| Mg4  | -3.043586 | 1.766662  | 2.233374  |
| Mg5  | 1.910747  | 4.772819  | 1.056444  |
| Mg6  | -4.241187 | -1.035673 | 2.239272  |
| Mg7  | 4.826515  | -0.523659 | 0.868434  |
| Mg8  | 1.534556  | -1.762680 | -2.641716 |
| Mg9  | 3.727924  | -2.701572 | -0.891828 |
| Mg10 | 0.708497  | 3.271156  | -1.360098 |
| Mg11 | -3.698377 | 0.353407  | -2.647730 |
| Mg12 | -1.469965 | -1.426093 | -1.453125 |
| Mg13 | 0.139983  | 2.323415  | 1.542316  |
| Mg14 | -0.297107 | 1.024038  | -3.110796 |
| Mg15 | 2.067181  | -0.234042 | 2.311674  |
| Mg16 | 4.003160  | 0.219787  | -1.970331 |
| Mg17 | -2.370141 | -3.137657 | 0.938035  |
| Mg18 | -1.936763 | 1.708261  | -0.578368 |
| Mg19 | 3.415374  | 2.124463  | 0.535078  |
| Mg20 | -5.039437 | 1.010234  | 0.057322  |
| Mg21 | 1.242432  | 0.279327  | -0.525588 |
| Mg22 | 0.858787  | -2.710795 | 0.326100  |

@mg22-isomer24 bp86/6-31G(d) Etot=-4402.042760 Eb=-14.53

|     |           |           |           |
|-----|-----------|-----------|-----------|
| Mg1 | 2.168567  | 1.144842  | -1.534202 |
| Mg2 | -2.473987 | -2.838196 | -1.905879 |
| Mg3 | 3.305243  | 3.183959  | 0.643318  |
| Mg4 | 2.412773  | -1.735900 | -0.703325 |
| Mg5 | -0.333200 | 0.095864  | 0.114247  |
| Mg6 | 0.770570  | 3.940928  | -1.286510 |
| Mg7 | -2.795442 | 0.241084  | -1.766901 |

|      |           |           |           |
|------|-----------|-----------|-----------|
| Mg8  | -2.137497 | 1.412741  | 2.252369  |
| Mg9  | 0.133681  | -1.297469 | -2.684354 |
| Mg10 | -0.447680 | 1.800305  | -2.885246 |
| Mg11 | 0.143700  | -3.611826 | -0.672749 |
| Mg12 | 5.484143  | -2.274488 | -0.656874 |
| Mg13 | -4.751021 | -1.611175 | -0.307854 |
| Mg14 | 0.760711  | -2.251044 | 1.976421  |
| Mg15 | -2.146607 | -2.357108 | 1.152968  |
| Mg16 | -2.037937 | 2.985895  | -0.402559 |
| Mg17 | 2.018184  | 0.573874  | 1.933793  |
| Mg18 | -4.559145 | 1.497004  | 0.399385  |
| Mg19 | 3.803357  | -1.865426 | 2.025338  |
| Mg20 | 4.710887  | 0.592341  | 0.264824  |
| Mg21 | 0.330615  | 3.032692  | 1.522190  |
| Mg22 | -4.359917 | -0.658898 | 2.521599  |

@mg22-isomer25 bp86/6-31G(d) Etot=-4402.038587 Eb=-14.41

|      |           |           |           |
|------|-----------|-----------|-----------|
| Mg1  | 0.089462  | -1.223671 | 0.270807  |
| Mg2  | 1.707642  | 1.182717  | 1.304687  |
| Mg3  | 0.089729  | -3.195069 | -2.233942 |
| Mg4  | -0.003823 | -0.121920 | -2.560433 |
| Mg5  | 5.051553  | 2.979513  | 0.005040  |
| Mg6  | -4.485527 | -0.149801 | 0.450566  |
| Mg7  | 2.342320  | 4.103689  | 0.160533  |
| Mg8  | -0.165491 | 3.685298  | 1.819408  |
| Mg9  | -5.538880 | 2.549718  | -0.296151 |
| Mg10 | 1.744164  | -4.220440 | 0.082212  |
| Mg11 | -1.602821 | 0.941852  | 1.417785  |
| Mg12 | -2.721301 | 1.159690  | -1.691044 |
| Mg13 | -0.108527 | 2.504821  | -0.999524 |
| Mg14 | 0.174333  | -3.273674 | 2.587932  |
| Mg15 | -1.417871 | -4.392505 | 0.129075  |
| Mg16 | -2.565555 | -2.056238 | 1.759845  |
| Mg17 | 2.769066  | -1.806918 | 1.675189  |
| Mg18 | 2.667498  | 1.415814  | -1.671152 |
| Mg19 | -2.611777 | -1.953514 | -1.331752 |
| Mg20 | -2.823737 | 3.578789  | 0.324846  |
| Mg21 | 2.757753  | -1.750333 | -1.448182 |
| Mg22 | 4.651790  | 0.042183  | 0.244257  |

@mg22-isomer26 bp86/6-31G(d) Etot=-4402.037938 Eb=-14.39

|      |           |           |           |
|------|-----------|-----------|-----------|
| Mg1  | 1.721386  | -1.446980 | 0.185454  |
| Mg2  | -0.826246 | 0.199634  | 0.648821  |
| Mg3  | -1.174811 | -2.800979 | -0.224581 |
| Mg4  | -0.096183 | -0.748731 | -2.365994 |
| Mg5  | -3.018548 | -0.641277 | -1.643198 |
| Mg6  | 3.752919  | -1.516049 | 2.417458  |
| Mg7  | 1.864945  | 0.950436  | 2.098298  |
| Mg8  | 1.598857  | 1.452532  | -1.038156 |
| Mg9  | -4.248082 | -3.141072 | -0.172444 |
| Mg10 | -0.211536 | 3.144420  | 1.250807  |
| Mg11 | -2.833344 | -1.408940 | 2.120919  |
| Mg12 | 4.399848  | 0.667281  | 0.215269  |
| Mg13 | -1.502567 | 2.238372  | -1.487607 |
| Mg14 | 4.644661  | -2.341558 | -0.398883 |
| Mg15 | 3.056226  | 3.560087  | 0.649752  |
| Mg16 | -4.609926 | 1.952582  | -1.207576 |
| Mg17 | -5.297479 | -0.391091 | 0.552408  |
| Mg18 | -3.248351 | 1.708082  | 1.538956  |
| Mg19 | 3.253330  | -0.732335 | -2.472557 |
| Mg20 | 1.702224  | -3.361442 | -2.058273 |
| Mg21 | 0.834273  | 4.452871  | -1.275510 |
| Mg22 | 0.238406  | -1.795843 | 2.666635  |

@mg22-isomer27 bp86/6-31G(d) Etot=-4402.037712 Eb=-14.39

|      |           |           |           |
|------|-----------|-----------|-----------|
| Mg1  | -0.925327 | -3.084383 | 1.159534  |
| Mg2  | -2.106238 | -4.285390 | -1.309445 |
| Mg3  | -3.781836 | 0.523846  | 0.136376  |
| Mg4  | 7.408636  | -2.381131 | -0.230329 |
| Mg5  | 0.297020  | -2.551777 | -1.547675 |
| Mg6  | 4.684244  | 2.075700  | -0.735095 |
| Mg7  | -2.833034 | 1.462190  | -2.699137 |
| Mg8  | 4.879499  | -0.692908 | 0.498333  |
| Mg9  | 2.850583  | 1.253186  | 1.623399  |
| Mg10 | -0.771135 | 0.005000  | -0.023982 |
| Mg11 | 1.074186  | -1.118602 | 2.089022  |
| Mg12 | -1.913046 | 3.069321  | -0.257208 |
| Mg13 | -2.559397 | -1.440980 | -2.245062 |
| Mg14 | -2.463499 | -0.951390 | 2.643516  |
| Mg15 | -0.582334 | 3.258447  | -3.086003 |
| Mg16 | 1.235173  | 2.314904  | -0.945130 |
| Mg17 | 0.092397  | 0.240285  | -3.046981 |
| Mg18 | -2.739390 | 2.092206  | 2.641971  |
| Mg19 | -3.884742 | -2.467704 | 0.347890  |
| Mg20 | -0.451920 | 0.677266  | 4.143017  |
| Mg21 | 0.139187  | 2.471333  | 1.864061  |
| Mg22 | 2.350973  | -0.469419 | -1.021071 |

@mg22-isomer28 bp86/6-31G(d) Etot=-4402.036925 Eb=-14.36

|      |           |           |           |
|------|-----------|-----------|-----------|
| Mg1  | -0.529800 | -2.371882 | 1.193771  |
| Mg2  | 2.393615  | -1.663099 | -2.233390 |
| Mg3  | -1.690467 | 0.497338  | 3.599899  |
| Mg4  | -2.095434 | 1.369036  | -2.655647 |
| Mg5  | -3.061879 | -1.525446 | -1.680720 |
| Mg6  | 4.817955  | -2.315258 | -0.377375 |
| Mg7  | -5.942635 | -1.508392 | -0.096018 |
| Mg8  | 0.935649  | 2.090816  | 3.901418  |
| Mg9  | 0.556726  | 0.594014  | 1.403327  |
| Mg10 | 3.153575  | 3.474274  | -1.603177 |
| Mg11 | 1.875111  | -3.947415 | -0.289619 |
| Mg12 | 1.503193  | 3.313941  | 0.970777  |
| Mg13 | -0.468956 | -3.182681 | -1.986352 |
| Mg14 | 0.027145  | 3.328613  | -1.699237 |
| Mg15 | -1.779441 | 2.190421  | 0.445820  |
| Mg16 | 0.903102  | -1.059734 | 4.002945  |
| Mg17 | 1.629945  | 1.235642  | -3.086768 |
| Mg18 | -4.683970 | 1.182161  | -0.914195 |
| Mg19 | 3.130365  | 0.767772  | -0.302596 |
| Mg20 | 2.483808  | -1.651673 | 1.473126  |
| Mg21 | -0.112318 | -0.295748 | -1.214534 |
| Mg22 | -3.045290 | -0.522699 | 1.148544  |

@mg22-isomer29 bp86/6-31G(d) Etot=-4402.033904 Eb=-14.28

|      |           |           |           |
|------|-----------|-----------|-----------|
| Mg1  | 1.373763  | -3.303077 | -1.747487 |
| Mg2  | 1.282552  | -0.425180 | -0.636794 |
| Mg3  | 0.793533  | 4.232157  | -1.007670 |
| Mg4  | -3.332839 | -2.346128 | 0.357701  |
| Mg5  | -1.146726 | 0.002726  | 1.047366  |
| Mg6  | -1.876695 | 3.092191  | 0.422920  |
| Mg7  | -0.084951 | -2.924206 | 1.064405  |
| Mg8  | 1.585368  | -0.640980 | 2.379319  |
| Mg9  | -1.264780 | -1.535931 | -1.970599 |
| Mg10 | -5.825850 | -0.578405 | 0.176657  |
| Mg11 | 3.113161  | -2.820870 | 0.637764  |
| Mg12 | 1.087850  | 2.206091  | 1.195588  |
| Mg13 | 3.954987  | 0.774673  | 0.557702  |
| Mg14 | 2.750806  | 1.862889  | -1.993379 |
| Mg15 | 4.545052  | -1.233475 | 2.810989  |

|      |           |           |           |
|------|-----------|-----------|-----------|
| Mg16 | 3.787133  | -1.192979 | -1.890978 |
| Mg17 | -3.246131 | 0.580760  | -1.119543 |
| Mg18 | -0.491229 | 1.634954  | -1.989838 |
| Mg19 | -3.920512 | 0.523451  | 2.140830  |
| Mg20 | -4.946906 | 2.688835  | 0.380936  |
| Mg21 | -1.680407 | -4.526634 | -0.955808 |
| Mg22 | 3.542823  | 3.929139  | 0.139919  |

@mg22-isomer30 bp86/6-31G(d) Etot=-4402.025428 Eb=-14.04

|      |           |           |           |
|------|-----------|-----------|-----------|
| Mg1  | -0.346338 | -1.445725 | -0.410259 |
| Mg2  | 1.928559  | 0.074180  | 1.366192  |
| Mg3  | -3.055955 | -0.576272 | 1.071879  |
| Mg4  | -0.560253 | -1.034120 | 2.725056  |
| Mg5  | -2.151918 | 0.657206  | -1.825968 |
| Mg6  | -2.588002 | 4.311896  | 0.498576  |
| Mg7  | 2.402732  | -2.196800 | -1.401170 |
| Mg8  | 2.526431  | 2.898527  | -0.053262 |
| Mg9  | 4.172152  | 0.557986  | -1.301269 |
| Mg10 | 0.402316  | 4.598879  | 1.129931  |
| Mg11 | -4.338967 | 2.052139  | -0.081307 |
| Mg12 | 5.324804  | -2.190230 | -2.078626 |
| Mg13 | -0.814225 | 1.582653  | 0.933276  |
| Mg14 | -5.000779 | -0.622254 | -1.323693 |
| Mg15 | -1.765621 | -3.507989 | 1.287149  |
| Mg16 | 1.108669  | 0.721564  | -1.768404 |
| Mg17 | 4.612103  | 1.323179  | 1.584339  |
| Mg18 | 1.570752  | -2.954542 | 1.567842  |
| Mg19 | -2.754417 | -2.639364 | -1.695657 |
| Mg20 | 4.440311  | -1.762313 | 0.903333  |
| Mg21 | -4.731633 | -3.279181 | 0.443507  |
| Mg22 | -0.380719 | 3.430581  | -1.571464 |

@mg22-isomer31 bp86/6-31G(d) Etot=-4402.023235 Eb=-13.97

|      |           |           |           |
|------|-----------|-----------|-----------|
| Mg1  | -0.722867 | -0.051552 | 0.530206  |
| Mg2  | 2.254128  | -0.018853 | -0.048102 |
| Mg3  | -2.308578 | -1.341453 | -1.679054 |
| Mg4  | 3.313962  | -2.889678 | -0.411528 |
| Mg5  | -4.902468 | 0.099987  | -0.973044 |
| Mg6  | 2.763937  | 2.543294  | -1.405150 |
| Mg7  | -3.748446 | 0.968889  | 1.716664  |
| Mg8  | -7.928838 | 0.248558  | -1.591518 |
| Mg9  | 4.876849  | 1.757579  | 0.697618  |
| Mg10 | 5.296970  | -0.526194 | -1.180685 |
| Mg11 | -1.272825 | -3.188971 | 0.752603  |
| Mg12 | 2.906988  | -0.853060 | -2.928560 |
| Mg13 | -1.665885 | -0.864246 | 3.111904  |
| Mg14 | 1.402022  | -1.951609 | 1.991196  |
| Mg15 | 0.050409  | 3.712303  | -0.529440 |
| Mg16 | -3.953900 | -1.917633 | 1.023318  |
| Mg17 | 0.576430  | -2.355731 | -1.504132 |
| Mg18 | 4.398099  | -1.013573 | 1.811161  |
| Mg19 | -2.399958 | 1.878875  | -0.998055 |
| Mg20 | 0.262661  | 0.786910  | -2.156412 |
| Mg21 | 1.876990  | 2.432632  | 1.634368  |
| Mg22 | -1.075680 | 2.543526  | 2.136641  |

@mg22-isomer32 bp86/6-31G(d) Etot=-4402.016849 Eb=-13.79

|     |           |           |           |
|-----|-----------|-----------|-----------|
| Mg1 | -0.480891 | 0.373725  | 0.525629  |
| Mg2 | 2.918702  | -0.219927 | 1.183152  |
| Mg3 | 0.669069  | -0.119816 | 3.278730  |
| Mg4 | -1.236092 | 3.313093  | 0.170619  |
| Mg5 | 1.386066  | 2.189012  | -1.172436 |
| Mg6 | -2.481752 | 0.928253  | -1.706778 |
| Mg7 | -2.085334 | -1.363168 | 2.542308  |



|      |           |           |           |
|------|-----------|-----------|-----------|
| Mg8  | 3.371647  | -2.739664 | -0.475659 |
| Mg9  | 4.178256  | 2.499323  | 0.510908  |
| Mg10 | 6.177439  | -1.865695 | -0.984155 |
| Mg11 | 1.372627  | 2.571189  | 1.781039  |
| Mg12 | 1.039412  | -0.900592 | -1.743822 |
| Mg13 | -4.157447 | 3.359914  | -0.729317 |
| Mg14 | 6.595651  | 1.133188  | -0.671260 |
| Mg15 | -3.325007 | 1.272350  | 1.413946  |
| Mg16 | -5.716812 | 0.800817  | -0.733216 |
| Mg17 | -1.763101 | -2.043876 | -1.384873 |
| Mg18 | -4.291158 | -1.638794 | 0.427769  |
| Mg19 | 0.610667  | -2.471000 | 1.025124  |
| Mg20 | -2.148210 | -3.943221 | 0.949695  |
| Mg21 | -4.513865 | -1.341462 | -2.556874 |
| Mg22 | 3.880134  | 0.206349  | -1.650529 |

@mg22-isomer33 bp86/6-31G(d) Etot=-4402.003922 Eb=-13.42

|      |           |           |           |
|------|-----------|-----------|-----------|
| Mg1  | 1.322082  | 0.280495  | 1.752782  |
| Mg2  | 2.798010  | -2.422815 | 1.229606  |
| Mg3  | -0.803470 | 0.523677  | -0.407747 |
| Mg4  | 4.253560  | -2.543435 | -1.635598 |
| Mg5  | -1.039776 | 2.956454  | -2.275556 |
| Mg6  | 5.916076  | -2.363252 | 0.807664  |
| Mg7  | 1.769428  | 1.988250  | -1.482167 |
| Mg8  | 3.953933  | 0.360007  | -0.055749 |
| Mg9  | -4.254972 | 0.108412  | 0.417371  |
| Mg10 | -1.970693 | 0.302420  | 2.522076  |
| Mg11 | -0.147735 | 2.779926  | 2.510748  |
| Mg12 | -0.322863 | -2.272942 | 1.235131  |
| Mg13 | 6.565789  | -0.533661 | -1.609821 |
| Mg14 | 2.640967  | 2.932548  | 1.251314  |
| Mg15 | -2.394147 | -2.076417 | -1.110279 |
| Mg16 | -2.561111 | 2.800878  | 0.454452  |
| Mg17 | -3.231100 | -2.389367 | 2.024284  |
| Mg18 | 0.228649  | 4.378005  | -0.042343 |
| Mg19 | -5.645692 | -2.930284 | 0.256838  |
| Mg20 | -5.374560 | -1.299529 | -2.247142 |
| Mg21 | 1.419531  | -1.233357 | -1.199148 |
| Mg22 | -3.121904 | 0.653985  | -2.396715 |

@mg22-isomer34 bp86/6-31G(d) Etot=-4401.997161 Eb=-13.23

|      |           |           |           |
|------|-----------|-----------|-----------|
| Mg1  | -0.361302 | 1.638755  | -1.613946 |
| Mg2  | 2.209799  | 0.101138  | -1.409514 |
| Mg3  | -1.144656 | 3.600344  | 0.666554  |
| Mg4  | -0.376189 | -1.551109 | -1.573839 |
| Mg5  | 0.685120  | -2.051984 | 1.334957  |
| Mg6  | -1.430304 | 0.199422  | 1.128610  |
| Mg7  | 1.361492  | 1.747659  | 0.994935  |
| Mg8  | -4.136702 | 1.805332  | 0.782911  |
| Mg9  | -3.177607 | -0.107084 | -1.406265 |
| Mg10 | -1.778634 | -2.235526 | 3.126817  |
| Mg11 | 5.287459  | -1.117442 | -1.032929 |
| Mg12 | -4.220431 | -1.020958 | 1.766228  |
| Mg13 | -2.907760 | -3.021950 | -2.496917 |
| Mg14 | -2.974844 | 3.215347  | -1.828792 |
| Mg15 | 2.709924  | -2.920317 | -0.832154 |
| Mg16 | -2.221934 | -3.157162 | 0.410850  |
| Mg17 | 4.423664  | 1.922951  | 0.012853  |
| Mg18 | -5.179623 | -2.492414 | -0.599181 |
| Mg19 | 6.476965  | 0.167716  | 1.685717  |
| Mg20 | -3.965644 | 4.834977  | 0.496969  |
| Mg21 | 3.410280  | -0.790533 | 1.325115  |
| Mg22 | 7.310927  | 1.232837  | -0.938978 |

@mg22-isomer35 bp86/6-31G(d) Etot=-4401.983668 Eb=-12.85

|      |           |           |           |
|------|-----------|-----------|-----------|
| Mg1  | 0.767351  | -0.218980 | -0.000362 |
| Mg2  | -1.554314 | -0.750019 | 1.913950  |
| Mg3  | 2.897579  | -2.597632 | 0.028148  |
| Mg4  | -4.241137 | -1.230315 | 0.015886  |
| Mg5  | -1.234457 | 2.024223  | -0.027194 |
| Mg6  | 3.350772  | 0.393315  | -1.618217 |
| Mg7  | 3.350401  | 0.430431  | 1.604711  |
| Mg8  | 1.355983  | -1.779012 | 2.526962  |
| Mg9  | 4.568157  | -2.174730 | 2.517638  |
| Mg10 | 1.836680  | 2.724190  | -0.030308 |
| Mg11 | 1.354894  | -1.839389 | -2.485365 |
| Mg12 | -1.556313 | -0.799709 | -1.897462 |
| Mg13 | -4.500282 | -1.053679 | 2.975317  |
| Mg14 | -6.824027 | 0.337695  | -1.503310 |
| Mg15 | -3.820013 | 1.525758  | 1.574556  |
| Mg16 | 4.565573  | -2.235958 | -2.470163 |
| Mg17 | -6.823213 | 0.378730  | 1.498450  |
| Mg18 | 3.831754  | 5.083369  | -0.042691 |
| Mg19 | -3.820394 | 1.485902  | -1.613993 |
| Mg20 | -4.503431 | -1.130176 | -2.945668 |
| Mg21 | 5.789798  | -0.850217 | 0.007539  |
| Mg22 | 5.208640  | 2.276202  | -0.028425 |

@mg23-isomer01 bp86/6-31G(d) Etot=-4602.187622 Eb=-15.95

|      |           |           |           |
|------|-----------|-----------|-----------|
| Mg1  | -4.806432 | 1.641478  | 0.296251  |
| Mg2  | -4.542206 | -0.653192 | -1.700810 |
| Mg3  | -2.276659 | 3.474421  | 0.845489  |
| Mg4  | -4.449412 | -1.145858 | 1.399712  |
| Mg5  | 0.467559  | 3.027328  | -0.573283 |
| Mg6  | -2.024902 | 1.305522  | -1.270771 |
| Mg7  | 0.220038  | 2.935958  | 2.473777  |
| Mg8  | 0.135027  | 1.658325  | -3.331612 |
| Mg9  | -1.793152 | 0.681916  | 1.875539  |
| Mg10 | -1.320228 | -1.013847 | -3.140690 |
| Mg11 | 2.811318  | 2.072534  | 1.249308  |
| Mg12 | -1.914035 | -1.730271 | -0.247941 |
| Mg13 | 2.817366  | 1.515080  | -1.861367 |
| Mg14 | 0.642281  | -0.015886 | -0.156163 |
| Mg15 | 1.138011  | 0.076979  | 3.012220  |
| Mg16 | -1.096130 | -2.054856 | 2.759216  |
| Mg17 | 1.666598  | -0.861280 | -3.506486 |
| Mg18 | 5.210055  | 0.837559  | -0.182642 |
| Mg19 | 0.642989  | -2.832222 | -1.474803 |
| Mg20 | 3.381387  | -1.430072 | -0.889706 |
| Mg21 | 4.053033  | -0.640171 | 2.066257  |
| Mg22 | -0.668238 | -4.316183 | 0.852080  |
| Mg23 | 1.705730  | -2.533262 | 1.506426  |

@mg23-isomer02 bp86/6-31G(d) Etot=-4602.182782 Eb=-15.82

|      |           |           |           |
|------|-----------|-----------|-----------|
| Mg1  | 1.111677  | -0.205406 | 0.011666  |
| Mg2  | 0.132295  | 2.565792  | 1.079550  |
| Mg3  | 3.513954  | -1.880420 | -0.553747 |
| Mg4  | -0.640255 | 0.009453  | 2.897788  |
| Mg5  | 2.077593  | 1.117636  | 3.008589  |
| Mg6  | 4.445789  | -0.280376 | 1.873219  |
| Mg7  | 2.508899  | 0.779686  | -2.418513 |
| Mg8  | 0.773147  | 3.183904  | -1.821584 |
| Mg9  | -2.706437 | 2.232823  | 1.953144  |
| Mg10 | -1.686753 | 0.085069  | 0.006067  |
| Mg11 | 5.210291  | 0.601746  | -0.819756 |
| Mg12 | 1.694355  | -2.003366 | 2.325207  |
| Mg13 | 3.001329  | 2.301799  | 0.325431  |
| Mg14 | 1.162446  | -1.933947 | -2.904809 |

|      |           |           |           |
|------|-----------|-----------|-----------|
| Mg15 | -3.557235 | -0.666259 | 2.461415  |
| Mg16 | -2.120880 | 2.764303  | -1.188630 |
| Mg17 | -3.478822 | 0.103393  | -2.415448 |
| Mg18 | -1.491250 | -2.377311 | -1.807051 |
| Mg19 | -4.187422 | -1.896099 | -0.212087 |
| Mg20 | -4.807969 | 1.036494  | 0.090092  |
| Mg21 | 0.868590  | -3.532161 | -0.340325 |
| Mg22 | -1.342934 | -2.608045 | 1.386851  |
| Mg23 | -0.480409 | 0.601290  | -2.937069 |

@mg23-isomer03 bp86/6-31G(d) Etot=-4602.182553 Eb=-15.81

|      |           |           |           |
|------|-----------|-----------|-----------|
| Mg1  | 1.689928  | 0.107520  | 0.425719  |
| Mg2  | -1.167672 | -1.987485 | 2.240856  |
| Mg3  | 1.757958  | -1.631478 | 2.974480  |
| Mg4  | 4.302066  | -0.255602 | -1.784659 |
| Mg5  | 4.716492  | 0.848560  | 0.985727  |
| Mg6  | -2.998834 | 0.722219  | 2.302383  |
| Mg7  | 0.248935  | 2.688809  | -0.828422 |
| Mg8  | -1.422324 | 1.446493  | -3.069165 |
| Mg9  | 3.774116  | -2.094045 | 0.586476  |
| Mg10 | 1.464813  | 0.613601  | -2.848893 |
| Mg11 | -1.061279 | -0.082323 | -0.193838 |
| Mg12 | -0.040427 | 0.733514  | 2.948173  |
| Mg13 | -2.815811 | 2.345270  | -0.473975 |
| Mg14 | -1.075782 | 3.259360  | 1.877524  |
| Mg15 | 0.961882  | -3.703747 | 0.976460  |
| Mg16 | -1.421153 | -2.981696 | -0.774674 |
| Mg17 | 1.972348  | 2.755852  | 1.752700  |
| Mg18 | -0.825393 | -1.398612 | -3.418873 |
| Mg19 | 3.255376  | 2.488271  | -1.128719 |
| Mg20 | 1.455857  | -2.127903 | -1.594002 |
| Mg21 | -3.555105 | -0.588104 | -1.982311 |
| Mg22 | -5.256567 | 0.671516  | 0.234747  |
| Mg23 | -3.959424 | -1.829990 | 0.792284  |

@mg23-isomer04 bp86/6-31G(d) Etot=-4602.181850 Eb=-15.79

|      |           |           |           |
|------|-----------|-----------|-----------|
| Mg1  | 1.981587  | 1.519174  | 2.917978  |
| Mg2  | -3.106639 | 1.330888  | 1.749722  |
| Mg3  | -1.327796 | 2.969219  | -0.642979 |
| Mg4  | -1.977155 | 1.149917  | -3.037892 |
| Mg5  | 0.945315  | 1.653751  | -2.519452 |
| Mg6  | -0.460372 | -0.230193 | 2.942185  |
| Mg7  | -3.402591 | -1.274323 | -1.678176 |
| Mg8  | 1.674343  | 0.051139  | -0.067925 |
| Mg9  | -1.308365 | -3.313557 | -0.615207 |
| Mg10 | 1.634534  | -2.886685 | -0.562760 |
| Mg11 | 3.969025  | 1.438350  | -1.639673 |
| Mg12 | -2.810396 | -1.846784 | 1.656877  |
| Mg13 | 4.492802  | -1.486860 | -0.486933 |
| Mg14 | 4.509481  | 0.878386  | 1.295238  |
| Mg15 | 2.684772  | -0.975845 | -2.958823 |
| Mg16 | -4.280968 | 1.708029  | -1.057069 |
| Mg17 | -1.132285 | -0.012057 | -0.063615 |
| Mg18 | -0.525924 | 2.828276  | 2.292443  |
| Mg19 | -0.246148 | -1.326083 | -2.631757 |
| Mg20 | -5.276458 | -0.512469 | 0.572019  |
| Mg21 | 2.370473  | -1.478473 | 2.272431  |
| Mg22 | 1.682843  | 2.998394  | 0.168647  |
| Mg23 | -0.090078 | -3.182196 | 2.094721  |

@mg23-isomer05 bp86/6-31G(d) Etot=-4602.179565 Eb=-15.73

|     |           |          |           |
|-----|-----------|----------|-----------|
| Mg1 | -1.179436 | 2.389489 | -0.724705 |
| Mg2 | 0.136526  | 4.208359 | 1.408140  |
| Mg3 | 0.560578  | 1.012489 | -2.989477 |

|      |           |           |           |
|------|-----------|-----------|-----------|
| Mg4  | -1.394609 | 1.925137  | 2.519958  |
| Mg5  | -2.397232 | 0.344308  | -2.674508 |
| Mg6  | -5.314291 | 0.209275  | -1.448860 |
| Mg7  | 1.814299  | 2.933122  | -0.778044 |
| Mg8  | -4.930933 | -1.080038 | 1.220930  |
| Mg9  | -3.350082 | -2.223496 | -1.238598 |
| Mg10 | 3.678015  | 1.203468  | -2.460947 |
| Mg11 | 2.358222  | -1.403492 | -2.848900 |
| Mg12 | 1.119419  | 0.033798  | -0.089729 |
| Mg13 | 4.107572  | 1.413884  | 0.580165  |
| Mg14 | -4.089442 | 1.873745  | 0.726247  |
| Mg15 | 1.606579  | 1.764239  | 2.438359  |
| Mg16 | -0.482187 | -1.918031 | -2.069633 |
| Mg17 | -1.846321 | -0.257517 | 0.544041  |
| Mg18 | -0.004043 | -0.772133 | 2.984236  |
| Mg19 | 4.422219  | -1.224685 | -0.639564 |
| Mg20 | -0.994217 | -3.051257 | 0.827917  |
| Mg21 | 1.893960  | -2.909965 | -0.214026 |
| Mg22 | 3.027801  | -1.027557 | 2.109055  |
| Mg23 | 1.257603  | -3.443143 | 2.817944  |

@mg23-isomer06 bp86/6-31G(d) Etot=-4602.179487 Eb=-15.73

|      |           |           |           |
|------|-----------|-----------|-----------|
| Mg1  | 0.796469  | 0.117889  | -0.144657 |
| Mg2  | -0.906494 | -3.497880 | 0.290892  |
| Mg3  | 3.584806  | 2.011986  | -1.352315 |
| Mg4  | -5.345043 | -0.332593 | 0.596173  |
| Mg5  | -2.154797 | -0.649566 | -0.460336 |
| Mg6  | 3.125444  | 1.307934  | 1.530802  |
| Mg7  | 2.535380  | -0.145034 | -3.253415 |
| Mg8  | -1.405542 | 2.165376  | -1.307743 |
| Mg9  | 1.856000  | -2.662927 | 1.259987  |
| Mg10 | 4.538271  | -1.494545 | 2.230419  |
| Mg11 | -2.815332 | 1.012432  | 1.985521  |
| Mg12 | -0.470171 | -0.214143 | -3.059867 |
| Mg13 | 1.094044  | 2.504142  | -2.991145 |
| Mg14 | -0.755328 | -1.236656 | 2.293455  |
| Mg15 | 3.749155  | -0.990436 | -0.602203 |
| Mg16 | -1.731662 | -2.951047 | -2.491109 |
| Mg17 | 1.156191  | 3.273485  | 0.040680  |
| Mg18 | 1.928448  | -0.588134 | 3.579888  |
| Mg19 | -1.686695 | 3.725641  | 1.168847  |
| Mg20 | -4.375389 | 2.469053  | -0.190943 |
| Mg21 | 0.160709  | 1.712455  | 2.538089  |
| Mg22 | 1.215410  | -2.530571 | -1.758405 |
| Mg23 | -4.093873 | -3.006860 | 0.097385  |

@mg23-isomer07 bp86/6-31G(d) Etot=-4602.179418 Eb=-15.73

|      |           |           |           |
|------|-----------|-----------|-----------|
| Mg1  | 1.191346  | 0.074228  | 3.345452  |
| Mg2  | 4.241918  | -0.804804 | 1.937751  |
| Mg3  | 4.947171  | 0.300974  | -0.770964 |
| Mg4  | 2.099009  | -0.414201 | -2.029110 |
| Mg5  | 1.997183  | 1.087577  | 0.637380  |
| Mg6  | -1.693017 | 2.709185  | 0.149650  |
| Mg7  | -3.410253 | -1.316600 | 1.243445  |
| Mg8  | -0.644969 | -0.211948 | -0.036035 |
| Mg9  | -5.181093 | -0.591566 | -1.190369 |
| Mg10 | -1.162147 | -3.279490 | 0.593362  |
| Mg11 | -2.519844 | -2.109647 | -1.795842 |
| Mg12 | -1.843408 | 0.887064  | 2.753692  |
| Mg13 | 1.524521  | -2.081448 | 1.208816  |
| Mg14 | 0.070838  | 1.991200  | -2.266767 |
| Mg15 | -2.792408 | 1.002677  | -2.159917 |
| Mg16 | 0.938416  | 4.041674  | -0.297094 |
| Mg17 | 0.335250  | 2.888556  | 2.435381  |

|      |           |           |           |
|------|-----------|-----------|-----------|
| Mg18 | -0.529707 | -0.705909 | -3.504906 |
| Mg19 | -0.897807 | -1.953914 | 3.245164  |
| Mg20 | 3.096725  | 2.468253  | -1.835973 |
| Mg21 | 3.918802  | -2.522926 | -0.703047 |
| Mg22 | -4.427355 | 1.508500  | 0.755385  |
| Mg23 | 0.740826  | -2.967435 | -1.715454 |

@mg23-isomer08 bp86/6-31G(d) Etot=-4602.178732 Eb=-15.71

|      |           |           |           |
|------|-----------|-----------|-----------|
| Mg1  | -1.332689 | 2.074178  | -1.055182 |
| Mg2  | -2.618077 | -0.552071 | -1.801085 |
| Mg3  | 2.203196  | -2.746714 | 0.269063  |
| Mg4  | 0.823485  | -0.016087 | 0.168242  |
| Mg5  | 2.002554  | -2.379946 | -2.812487 |
| Mg6  | 3.081871  | 0.470283  | -2.136942 |
| Mg7  | 3.930405  | -0.174683 | 0.855100  |
| Mg8  | 2.599736  | 2.479134  | 0.165877  |
| Mg9  | -5.277857 | -0.374947 | 1.555887  |
| Mg10 | -5.781973 | -0.953988 | -1.316673 |
| Mg11 | -0.018572 | 2.498657  | 1.815046  |
| Mg12 | 0.101587  | -0.036765 | -2.933404 |
| Mg13 | -3.131768 | -2.513007 | 0.468697  |
| Mg14 | 1.207751  | 2.776407  | -2.661537 |
| Mg15 | 0.344364  | 4.537216  | -0.398992 |
| Mg16 | -4.567442 | 1.741189  | -0.528978 |
| Mg17 | 4.636689  | -2.014733 | -1.484925 |
| Mg18 | -2.049426 | 0.224976  | 1.327736  |
| Mg19 | -0.419073 | -2.342363 | 1.881910  |
| Mg20 | 2.325225  | -1.559599 | 3.045964  |
| Mg21 | -0.071811 | 0.093356  | 3.697382  |
| Mg22 | 2.562647  | 1.426221  | 3.057681  |
| Mg23 | -0.550824 | -2.656715 | -1.178381 |

@mg23-isomer09 bp86/6-31G(d) Etot=-4602.178241 Eb=-15.69

|      |           |           |           |
|------|-----------|-----------|-----------|
| Mg1  | 3.599968  | -1.685351 | 1.364596  |
| Mg2  | 0.140681  | -1.307676 | -2.316354 |
| Mg3  | 4.912086  | 0.260010  | -0.649984 |
| Mg4  | 0.654325  | -2.573365 | 2.509177  |
| Mg5  | -1.511080 | 0.107772  | -0.080202 |
| Mg6  | 0.887290  | 0.416961  | 3.156204  |
| Mg7  | -4.178148 | 1.097439  | 1.479170  |
| Mg8  | -2.920930 | -1.792836 | -2.301125 |
| Mg9  | 1.297118  | -3.566972 | -0.203694 |
| Mg10 | 0.348445  | 2.113794  | -1.767723 |
| Mg11 | 3.179548  | 2.742132  | -0.853206 |
| Mg12 | 3.628905  | 1.327949  | 1.802710  |
| Mg13 | 3.190909  | -1.927163 | -1.745864 |
| Mg14 | -1.812297 | -0.909607 | 2.687381  |
| Mg15 | -1.482697 | 2.186827  | 2.708446  |
| Mg16 | 0.855098  | 2.876905  | 1.151222  |
| Mg17 | -1.489971 | -2.912266 | 0.216042  |
| Mg18 | -4.695121 | 0.670718  | -1.441057 |
| Mg19 | 2.661912  | 0.673538  | -2.957536 |
| Mg20 | -4.341682 | -1.662072 | 0.448022  |
| Mg21 | 1.422710  | -0.091754 | 0.134441  |
| Mg22 | -2.153953 | 1.025685  | -3.032072 |
| Mg23 | -2.193115 | 2.929333  | -0.308594 |

@mg23-isomer10 bp86/6-31G(d) Etot=-4602.177266 Eb=-15.67

|     |           |           |           |
|-----|-----------|-----------|-----------|
| Mg1 | 0.979349  | -0.338632 | 3.567829  |
| Mg2 | -3.212065 | 0.728884  | 1.016437  |
| Mg3 | 5.211759  | 0.724831  | 0.089704  |
| Mg4 | 2.713759  | 0.103447  | -1.577117 |
| Mg5 | 2.082663  | 1.231993  | 1.228780  |
| Mg6 | -1.956334 | 3.219385  | -0.215712 |

|      |           |           |           |
|------|-----------|-----------|-----------|
| Mg7  | -2.769524 | -2.293811 | 0.820678  |
| Mg8  | -0.377117 | -0.302101 | 0.005749  |
| Mg9  | -4.456302 | -0.969617 | -1.308059 |
| Mg10 | -0.199555 | -3.646410 | -0.095847 |
| Mg11 | -1.808458 | -2.275807 | -2.247645 |
| Mg12 | -1.986958 | -0.612581 | 3.432107  |
| Mg13 | 2.080436  | -1.863972 | 0.977390  |
| Mg14 | 0.563335  | 2.215365  | -1.607133 |
| Mg15 | -2.223510 | 0.880359  | -2.258277 |
| Mg16 | 0.850377  | 4.090194  | 0.687729  |
| Mg17 | -0.690199 | 1.956352  | 2.325332  |
| Mg18 | 0.280336  | -0.388210 | -3.308424 |
| Mg19 | -0.306887 | -2.931548 | 2.814369  |
| Mg20 | 3.682127  | 3.246287  | -0.386617 |
| Mg21 | 4.608277  | -2.174702 | -0.779262 |
| Mg22 | -4.755386 | 2.133483  | -1.060816 |
| Mg23 | 1.689876  | -2.733187 | -2.121196 |

@mg23-isomer11 bp86/6-31G(d) Etot=-4602.176338 Eb=-15.64

|      |           |           |           |
|------|-----------|-----------|-----------|
| Mg1  | -0.485114 | 2.315630  | 2.714473  |
| Mg2  | 1.841153  | 2.119652  | 0.675893  |
| Mg3  | 1.457251  | 0.269532  | 3.297535  |
| Mg4  | -5.177184 | 1.035194  | -0.934437 |
| Mg5  | -0.599335 | 0.186401  | 0.001381  |
| Mg6  | 4.393368  | 0.353408  | 1.888523  |
| Mg7  | 1.977666  | -1.111465 | 0.601977  |
| Mg8  | 1.918471  | -2.267784 | -2.245903 |
| Mg9  | -0.841976 | 3.452186  | 0.035022  |
| Mg10 | 0.590362  | 2.821324  | -2.420598 |
| Mg11 | -0.338378 | -0.155903 | -3.059330 |
| Mg12 | -2.382736 | 1.941945  | -2.059224 |
| Mg13 | 2.418664  | 0.638474  | -1.989830 |
| Mg14 | 0.691572  | -3.816115 | 0.088755  |
| Mg15 | -3.091441 | 1.700922  | 1.154129  |
| Mg16 | -3.116519 | -0.985519 | -1.695444 |
| Mg17 | -1.958372 | -2.509166 | 0.713895  |
| Mg18 | 4.862588  | 1.937033  | -0.634927 |
| Mg19 | -4.550743 | -0.987234 | 1.164495  |
| Mg20 | 0.316447  | -2.464458 | 2.785804  |
| Mg21 | -1.743270 | -0.376234 | 3.021792  |
| Mg22 | -0.980766 | -3.002818 | -2.226712 |
| Mg23 | 4.798295  | -1.095006 | -0.877270 |

@mg23-isomer12 bp86/6-31G(d) Etot=-4602.175521 Eb=-15.62

|      |           |           |           |
|------|-----------|-----------|-----------|
| Mg1  | 4.807794  | 2.462791  | -0.397677 |
| Mg2  | 1.838992  | 3.362898  | 0.550881  |
| Mg3  | -1.033956 | 3.350396  | 1.222644  |
| Mg4  | -0.119282 | 2.783773  | -1.742323 |
| Mg5  | 3.526130  | 1.222271  | 1.993206  |
| Mg6  | 4.964323  | -0.668074 | 0.098632  |
| Mg7  | 0.535386  | 1.185547  | 2.566714  |
| Mg8  | -2.479289 | 0.955602  | 2.528441  |
| Mg9  | 2.114315  | 0.732013  | -1.032502 |
| Mg10 | -2.181967 | 1.157869  | -3.254312 |
| Mg11 | -3.128796 | 2.204746  | -0.460614 |
| Mg12 | -5.149388 | 0.687130  | 1.225428  |
| Mg13 | 1.902171  | -1.215843 | 1.311100  |
| Mg14 | -0.733851 | 0.088969  | -0.113997 |
| Mg15 | 3.766448  | -3.361136 | -0.085227 |
| Mg16 | -0.796391 | -1.725812 | 2.570518  |
| Mg17 | 0.603324  | 0.312913  | -3.619274 |
| Mg18 | -3.673440 | -1.865300 | 1.780100  |
| Mg19 | 1.084788  | -2.170793 | -1.608010 |
| Mg20 | -3.567950 | -0.748420 | -1.055841 |

|      |           |           |           |
|------|-----------|-----------|-----------|
| Mg21 | -1.671886 | -2.980710 | -0.275838 |
| Mg22 | -1.439685 | -1.784242 | -3.144901 |
| Mg23 | 0.832212  | -3.986589 | 0.942852  |

@mg23-isomer13 bp86/6-31G(d) Etot=-4602.175070 Eb=-15.61

|      |           |           |           |
|------|-----------|-----------|-----------|
| Mg1  | -3.097872 | -2.785199 | 0.041936  |
| Mg2  | -2.937508 | -0.678996 | 2.260954  |
| Mg3  | -3.085804 | 1.364552  | -2.388893 |
| Mg4  | -0.009377 | 0.086342  | 3.117574  |
| Mg5  | 2.249968  | -1.583715 | 1.882663  |
| Mg6  | 1.886081  | -1.112182 | -1.242399 |
| Mg7  | -2.336905 | 1.888056  | 3.699008  |
| Mg8  | -0.961058 | -0.098866 | -0.080090 |
| Mg9  | -0.547204 | -2.860701 | -1.571991 |
| Mg10 | 4.755376  | -0.097046 | 0.117162  |
| Mg11 | -0.659669 | 2.744022  | -1.437081 |
| Mg12 | -0.335187 | 2.952631  | 1.669665  |
| Mg13 | -3.060162 | -1.587935 | -2.786486 |
| Mg14 | 1.814642  | 1.118009  | 0.743694  |
| Mg15 | -0.439763 | 0.008192  | -3.143664 |
| Mg16 | -0.543456 | -2.678435 | 1.718521  |
| Mg17 | 2.057881  | 1.696785  | -2.379294 |
| Mg18 | -4.528982 | -0.284150 | -0.384533 |
| Mg19 | 4.587164  | 2.801740  | -0.434849 |
| Mg20 | 1.811308  | 3.975848  | -0.403135 |
| Mg21 | 1.718736  | -3.922900 | 0.098019  |
| Mg22 | -3.076904 | 2.134700  | 0.588063  |
| Mg23 | 4.738697  | -3.080751 | 0.315155  |

@mg23-isomer14 bp86/6-31G(d) Etot=-4602.174711 Eb=-15.60

|      |           |           |           |
|------|-----------|-----------|-----------|
| Mg1  | -1.232211 | 0.359446  | 3.515174  |
| Mg2  | -3.600038 | 0.088191  | 1.591797  |
| Mg3  | -3.722974 | -2.508556 | 0.002588  |
| Mg4  | -1.445237 | -2.239645 | 2.036634  |
| Mg5  | -1.861011 | 2.708318  | 1.750370  |
| Mg6  | -1.374643 | -4.482709 | 0.006124  |
| Mg7  | -4.393048 | 2.642606  | -0.002695 |
| Mg8  | 1.142666  | 1.923029  | 2.706164  |
| Mg9  | 1.301752  | -1.062863 | 2.668624  |
| Mg10 | -3.602604 | 0.084467  | -1.591252 |
| Mg11 | -0.872296 | 0.101766  | -0.001632 |
| Mg12 | 0.936760  | -2.486772 | 0.002890  |
| Mg13 | -1.445765 | -2.246686 | -2.032800 |
| Mg14 | 0.532441  | 3.081421  | -0.003422 |
| Mg15 | 4.039186  | 0.378445  | 2.367053  |
| Mg16 | -1.862149 | 2.704927  | -1.755513 |
| Mg17 | 2.058109  | 0.497564  | 0.000710  |
| Mg18 | -1.234039 | 0.351798  | -3.513107 |
| Mg19 | 4.334365  | -1.881840 | 0.000553  |
| Mg20 | 1.300792  | -1.070099 | -2.665945 |
| Mg21 | 5.823317  | 0.763878  | -0.002884 |
| Mg22 | 1.141532  | 1.915844  | -2.709630 |
| Mg23 | 4.035094  | 0.377468  | -2.369803 |

@mg23-isomer15 bp86/6-31G(d) Etot=-4602.174125 Eb=-15.58

|     |           |           |           |
|-----|-----------|-----------|-----------|
| Mg1 | -1.533451 | 2.595170  | -2.001471 |
| Mg2 | 1.302180  | 3.091005  | -1.355025 |
| Mg3 | 4.150386  | 2.183132  | -1.144266 |
| Mg4 | 0.457223  | 0.291514  | -2.776926 |
| Mg5 | -3.819630 | 0.364720  | -1.888997 |
| Mg6 | -1.367094 | -0.051478 | -0.120323 |
| Mg7 | 2.471835  | 2.395384  | 1.561215  |
| Mg8 | -0.660030 | 2.987823  | 0.892797  |
| Mg9 | 5.140550  | -0.011190 | 0.585092  |

|      |           |           |           |
|------|-----------|-----------|-----------|
| Mg10 | 3.771576  | -0.756060 | -2.063187 |
| Mg11 | -3.752504 | 2.729855  | 0.060876  |
| Mg12 | -1.666066 | -1.919099 | -2.632935 |
| Mg13 | -3.895848 | -2.313995 | -0.400603 |
| Mg14 | 1.084846  | -2.556074 | -1.573514 |
| Mg15 | 1.690721  | 0.070571  | -0.063037 |
| Mg16 | -4.813203 | 0.063168  | 1.016581  |
| Mg17 | 0.160928  | 0.502187  | 2.592374  |
| Mg18 | 3.091250  | -0.508360 | 2.675672  |
| Mg19 | -2.681156 | 1.419995  | 2.576665  |
| Mg20 | 3.664388  | -2.618489 | 0.449263  |
| Mg21 | -1.261586 | -3.721075 | -0.132650 |
| Mg22 | 0.751489  | -2.456024 | 1.576765  |
| Mg23 | -2.286803 | -1.782678 | 2.165637  |

@mg23-isomer16 bp86/6-31G(d) Etot=-4602.172961 Eb=-15.55

|      |           |           |           |
|------|-----------|-----------|-----------|
| Mg1  | 2.853818  | -3.015680 | 1.278708  |
| Mg2  | 4.033465  | -2.885048 | -1.441610 |
| Mg3  | 0.948440  | -3.046551 | -1.159552 |
| Mg4  | 3.915422  | -0.262797 | 0.222441  |
| Mg5  | -0.113575 | -2.544640 | 1.744276  |
| Mg6  | 2.085145  | -0.512312 | 2.788814  |
| Mg7  | 2.401424  | -0.644765 | -2.600254 |
| Mg8  | -0.502543 | -0.848847 | 4.259379  |
| Mg9  | 0.721900  | -0.019777 | 0.002232  |
| Mg10 | -1.883150 | -1.721709 | -0.720641 |
| Mg11 | 2.667557  | 2.200422  | 1.672410  |
| Mg12 | -0.361059 | -1.453521 | -3.350079 |
| Mg13 | -2.475087 | -0.579807 | 2.050203  |
| Mg14 | 2.870425  | 2.079950  | -1.483640 |
| Mg15 | -5.082526 | -1.648952 | 0.247836  |
| Mg16 | 2.985994  | 4.651585  | -0.004787 |
| Mg17 | -2.704542 | 0.321627  | -2.979667 |
| Mg18 | -0.263293 | 1.657865  | 2.484739  |
| Mg19 | 0.058936  | 1.575654  | -2.616712 |
| Mg20 | -2.074413 | 1.477736  | -0.207610 |
| Mg21 | -5.362637 | 0.774011  | -1.534794 |
| Mg22 | 0.306100  | 3.288912  | -0.074158 |
| Mg23 | -5.025803 | 1.156643  | 1.422467  |

@mg23-isomer17 bp86/6-31G(d) Etot=-4602.172633 Eb=-15.54

|      |           |           |           |
|------|-----------|-----------|-----------|
| Mg1  | -4.815998 | -0.801928 | -0.102826 |
| Mg2  | -2.792101 | -0.298677 | 2.092039  |
| Mg3  | -2.901749 | 1.411601  | -1.056105 |
| Mg4  | 4.528353  | -1.494268 | 0.679918  |
| Mg5  | 0.973430  | 3.365022  | 1.800034  |
| Mg6  | 2.302752  | -1.615750 | -1.327998 |
| Mg7  | 2.338577  | -1.326283 | 2.955853  |
| Mg8  | -1.925620 | 2.680155  | 1.528834  |
| Mg9  | -4.943051 | 1.986218  | 1.138126  |
| Mg10 | -0.325875 | -2.375831 | 2.034276  |
| Mg11 | 0.321170  | -1.492671 | -3.632768 |
| Mg12 | 2.259574  | -3.565392 | 0.920559  |
| Mg13 | -0.428868 | -0.165734 | -0.192721 |
| Mg14 | 1.820962  | 1.102488  | -2.503414 |
| Mg15 | 0.032082  | 0.633957  | 2.870128  |
| Mg16 | -2.952973 | -2.996085 | 0.530856  |
| Mg17 | -0.989957 | 1.121669  | -3.428489 |
| Mg18 | -0.209234 | -3.210862 | -0.951621 |
| Mg19 | 2.233643  | 0.720839  | 0.719773  |
| Mg20 | 2.947705  | 3.464121  | -0.606233 |
| Mg21 | 5.076251  | 1.384889  | -0.224732 |
| Mg22 | -0.108997 | 2.868910  | -0.995563 |
| Mg23 | -2.440076 | -1.396387 | -2.247925 |



@mg23-isomer18 bp86/6-31G(d) Etot=-4602.171137 Eb=-15.50

|      |           |           |           |
|------|-----------|-----------|-----------|
| Mg1  | -4.694637 | -1.500324 | -0.903265 |
| Mg2  | -4.855209 | 1.365717  | -0.096398 |
| Mg3  | -2.439165 | -2.727465 | -2.526725 |
| Mg4  | -4.260657 | -0.810024 | 2.071410  |
| Mg5  | -1.855268 | -2.039121 | 0.425141  |
| Mg6  | 0.888065  | -2.662057 | 1.478947  |
| Mg7  | -1.193798 | -0.974290 | 3.229567  |
| Mg8  | -1.811435 | 0.254511  | -1.856985 |
| Mg9  | 0.413094  | -2.322919 | -1.845775 |
| Mg10 | 0.909324  | 0.298183  | -3.252997 |
| Mg11 | -1.932908 | 1.140047  | 1.206732  |
| Mg12 | 3.383986  | -0.883965 | -2.024907 |
| Mg13 | 1.745889  | -0.566282 | 3.504277  |
| Mg14 | 2.603066  | 2.157796  | -1.470765 |
| Mg15 | 2.847952  | -3.515120 | -0.725564 |
| Mg16 | 0.750467  | 0.102970  | 0.063436  |
| Mg17 | -2.464311 | 3.141580  | -0.955125 |
| Mg18 | -0.035665 | 3.023824  | -2.557501 |
| Mg19 | 3.615622  | -1.234595 | 1.157656  |
| Mg20 | 0.135680  | 1.901177  | 3.234532  |
| Mg21 | 5.053377  | 0.887224  | -0.275311 |
| Mg22 | 0.373445  | 3.220157  | 0.451773  |
| Mg23 | 2.823085  | 1.742977  | 1.667846  |

@mg23-isomer19 bp86/6-31G(d) Etot=-4602.169299 Eb=-15.45

|      |           |           |           |
|------|-----------|-----------|-----------|
| Mg1  | 1.641333  | -0.617074 | -0.934116 |
| Mg2  | 3.722441  | -3.017775 | -0.247111 |
| Mg3  | -1.019608 | -1.871845 | -2.272604 |
| Mg4  | -1.826309 | -3.094105 | 0.359167  |
| Mg5  | -1.051278 | 0.269683  | 0.164997  |
| Mg6  | -1.105637 | 3.538862  | 0.941758  |
| Mg7  | -1.887769 | 3.170251  | -1.873294 |
| Mg8  | 0.854042  | -3.828378 | -0.953701 |
| Mg9  | 1.220932  | 1.766564  | 1.691688  |
| Mg10 | -1.488556 | 1.651248  | 3.236863  |
| Mg11 | -0.134985 | 0.958685  | -2.879599 |
| Mg12 | -1.869560 | -1.310401 | 2.839896  |
| Mg13 | 3.251506  | -0.505643 | 1.705312  |
| Mg14 | -4.013167 | -0.860119 | 0.611073  |
| Mg15 | 1.081841  | 3.057630  | -1.072019 |
| Mg16 | 0.756619  | -0.215775 | 3.973464  |
| Mg17 | 3.139305  | 1.378544  | -2.618917 |
| Mg18 | -4.018083 | -2.685341 | -1.747791 |
| Mg19 | -3.764476 | 2.148848  | 0.311997  |
| Mg20 | 0.738085  | -2.157771 | 1.577762  |
| Mg21 | 3.939575  | 2.256981  | 0.101999  |
| Mg22 | -3.191653 | 0.364514  | -2.127793 |
| Mg23 | 5.025400  | -0.397582 | -0.789031 |

@mg23-isomer20 bp86/6-31G(d) Etot=-4602.169068 Eb=-15.44

|      |           |           |           |
|------|-----------|-----------|-----------|
| Mg1  | 0.917934  | 2.510002  | 2.815879  |
| Mg2  | -3.283473 | 3.682638  | -0.304364 |
| Mg3  | 2.876468  | 2.372638  | 0.428951  |
| Mg4  | 2.657952  | -0.076391 | 2.677856  |
| Mg5  | -1.928435 | 1.710746  | 1.728898  |
| Mg6  | -0.307746 | -0.033067 | 3.521068  |
| Mg7  | 0.726296  | -2.583349 | 2.596666  |
| Mg8  | -0.140716 | 3.583519  | 0.272693  |
| Mg9  | 4.406094  | -0.209830 | 0.116487  |
| Mg10 | 1.269708  | 2.781071  | -2.168369 |
| Mg11 | 3.234175  | -2.789671 | 0.930697  |
| Mg12 | 0.996254  | 0.029337  | 0.060953  |

|      |           |           |           |
|------|-----------|-----------|-----------|
| Mg13 | 3.759261  | 1.119471  | -2.382418 |
| Mg14 | -1.611675 | -1.160169 | 0.912674  |
| Mg15 | -4.766211 | 1.134069  | -0.002487 |
| Mg16 | -1.371365 | 1.194370  | -1.352808 |
| Mg17 | 0.507042  | -3.556245 | -0.203313 |
| Mg18 | 2.586605  | -1.829134 | -1.876848 |
| Mg19 | -4.913118 | -1.878012 | 0.527580  |
| Mg20 | 1.073413  | 0.220452  | -3.574582 |
| Mg21 | -3.569021 | -0.897207 | -1.924967 |
| Mg22 | -0.608130 | -1.743268 | -2.181650 |
| Mg23 | -2.511313 | -3.581968 | -0.618596 |

@mg23-isomer21 bp86/6-31G(d) Etot=-4602.168628 Eb=-15.43

|      |           |           |           |
|------|-----------|-----------|-----------|
| Mg1  | -5.125820 | 0.776902  | -0.128304 |
| Mg2  | -3.359061 | 3.156835  | 0.351468  |
| Mg3  | -4.718365 | -2.054960 | 0.835223  |
| Mg4  | -2.581175 | 0.220436  | 1.424441  |
| Mg5  | -0.374359 | 2.209279  | 1.702247  |
| Mg6  | -0.319093 | -0.346290 | 3.370069  |
| Mg7  | -1.781910 | -2.638855 | 2.132874  |
| Mg8  | -0.594310 | 4.173896  | -0.465587 |
| Mg9  | -1.494083 | 1.262017  | -1.466499 |
| Mg10 | -2.147815 | -1.714640 | -0.957219 |
| Mg11 | 2.321590  | 0.774778  | 2.251679  |
| Mg12 | 0.493915  | -0.467499 | 0.112692  |
| Mg13 | 2.131130  | 3.750568  | 1.107419  |
| Mg14 | 1.649987  | -2.413366 | 2.330051  |
| Mg15 | -0.002092 | -3.630142 | 0.017590  |
| Mg16 | 1.496118  | 2.151189  | -1.298707 |
| Mg17 | 4.244695  | 1.840609  | 0.111862  |
| Mg18 | 2.878791  | -3.071613 | -0.473848 |
| Mg19 | 4.367430  | -1.087115 | 1.014610  |
| Mg20 | -1.743970 | -0.798051 | -3.814438 |
| Mg21 | 3.107654  | -0.369319 | -1.799193 |
| Mg22 | 0.695667  | -2.261281 | -2.630752 |
| Mg23 | 0.855076  | 0.536624  | -3.727677 |

@mg23-isomer22 bp86/6-31G(d) Etot=-4602.167657 Eb=-15.40

|      |           |           |           |
|------|-----------|-----------|-----------|
| Mg1  | 3.615428  | -3.687559 | -0.369811 |
| Mg2  | 3.785344  | -0.722064 | -0.152651 |
| Mg3  | 2.669743  | -2.088171 | -2.761274 |
| Mg4  | 2.057636  | -2.208056 | 1.892595  |
| Mg5  | 3.962691  | 2.256101  | -0.012272 |
| Mg6  | 0.604809  | -2.985263 | -0.692846 |
| Mg7  | 2.635444  | 0.734465  | 2.357113  |
| Mg8  | 2.342661  | 0.835788  | -2.339417 |
| Mg9  | 0.150761  | -0.718311 | 3.934230  |
| Mg10 | -0.961746 | -2.570071 | 1.974257  |
| Mg11 | 0.597314  | 0.028586  | 0.125425  |
| Mg12 | -0.256122 | -1.027822 | -2.923152 |
| Mg13 | 1.884876  | 3.641973  | 1.587533  |
| Mg14 | 1.482132  | 3.523191  | -1.323666 |
| Mg15 | -2.182416 | -1.687143 | -0.618424 |
| Mg16 | -0.166214 | 1.916642  | 2.771922  |
| Mg17 | -0.401340 | 1.990759  | -2.999828 |
| Mg18 | -1.169616 | 2.406209  | -0.074904 |
| Mg19 | -2.297090 | 0.138657  | 1.815686  |
| Mg20 | -2.852742 | 0.618999  | -2.300697 |
| Mg21 | -5.134446 | -1.122142 | 1.445556  |
| Mg22 | -4.871452 | 1.575196  | 0.144979  |
| Mg23 | -5.495655 | -0.849964 | -1.480355 |

@mg23-isomer23 bp86/6-31G(d) Etot=-4602.167594 Eb=-15.40

|     |          |           |          |
|-----|----------|-----------|----------|
| Mg1 | 1.195686 | -0.067536 | 0.012146 |
|-----|----------|-----------|----------|

|      |           |           |           |
|------|-----------|-----------|-----------|
| Mg2  | 0.090285  | 1.520710  | -2.370746 |
| Mg3  | 4.533850  | 1.340086  | 0.303337  |
| Mg4  | 3.187084  | 0.007664  | -2.242670 |
| Mg5  | 0.156788  | 1.385838  | 2.656426  |
| Mg6  | -2.853624 | -2.262228 | 0.966344  |
| Mg7  | -0.175471 | -1.682349 | 2.269765  |
| Mg8  | -1.838930 | 0.851405  | 0.419149  |
| Mg9  | 0.586178  | -1.426838 | -3.126918 |
| Mg10 | -2.186422 | -0.822532 | -2.064295 |
| Mg11 | 4.434886  | -1.607902 | 0.137373  |
| Mg12 | 2.184870  | -3.128115 | 1.282657  |
| Mg13 | -5.087353 | -0.081596 | 1.482930  |
| Mg14 | -5.009156 | -1.575690 | -1.082590 |
| Mg15 | 0.091925  | 3.167054  | 0.154252  |
| Mg16 | 2.574559  | 2.987861  | 1.874926  |
| Mg17 | -4.638972 | 1.403594  | -1.244523 |
| Mg18 | -2.445328 | 3.350187  | -1.604276 |
| Mg19 | -2.591932 | -0.047450 | 3.264510  |
| Mg20 | 2.582970  | 2.890359  | -1.292158 |
| Mg21 | 2.861561  | -0.165917 | 2.502260  |
| Mg22 | 2.608170  | -3.079301 | -1.738455 |
| Mg23 | -0.261624 | -2.957305 | -0.559444 |

@mg23-isomer24 bp86/6-31G(d) Etot=-4602.165707 Eb=-15.35

|      |           |           |           |
|------|-----------|-----------|-----------|
| Mg1  | 1.429568  | 0.005057  | -0.476634 |
| Mg2  | 2.781830  | 2.689629  | 0.442496  |
| Mg3  | -0.903648 | 0.755129  | -2.729696 |
| Mg4  | 4.465000  | 0.633787  | -1.580911 |
| Mg5  | 0.210033  | 1.608649  | 2.137623  |
| Mg6  | -1.511722 | -0.109930 | 0.062332  |
| Mg7  | 2.971549  | -2.243469 | -1.956751 |
| Mg8  | 1.981054  | 1.971058  | -2.721011 |
| Mg9  | 1.583427  | -2.875730 | 0.784989  |
| Mg10 | 2.670936  | -0.275331 | 2.385498  |
| Mg11 | -0.083416 | 2.952898  | -0.582507 |
| Mg12 | 5.180358  | 1.172515  | 1.320511  |
| Mg13 | 4.599341  | -1.637281 | 0.425689  |
| Mg14 | -2.714839 | 0.209825  | 2.758952  |
| Mg15 | -0.112945 | -2.397727 | -1.759697 |
| Mg16 | -0.161746 | -1.492213 | 2.817994  |
| Mg17 | -2.289026 | 3.118490  | 1.446361  |
| Mg18 | -2.928683 | 2.655536  | -1.459988 |
| Mg19 | -3.941313 | -0.118613 | -1.978459 |
| Mg20 | -4.646859 | 1.386231  | 0.685393  |
| Mg21 | -1.420599 | -3.379266 | 0.890071  |
| Mg22 | -2.999113 | -3.012575 | -1.663169 |
| Mg23 | -4.159187 | -1.616667 | 0.750914  |

@mg23-isomer25 bp86/6-31G(d) Etot=-4602.165529 Eb=-15.35

|      |           |           |           |
|------|-----------|-----------|-----------|
| Mg1  | -1.745809 | 0.177864  | -0.862769 |
| Mg2  | -1.125107 | -2.438514 | 0.923193  |
| Mg3  | -4.867063 | 1.267243  | 1.136627  |
| Mg4  | 1.728430  | -2.438301 | 2.355651  |
| Mg5  | 1.350860  | -0.400387 | -0.032273 |
| Mg6  | -0.051254 | -2.164539 | -2.182998 |
| Mg7  | 2.634527  | 3.163529  | -1.495640 |
| Mg8  | -2.918064 | -0.293528 | 2.746820  |
| Mg9  | 1.184061  | 0.764759  | -2.715819 |
| Mg10 | 4.265341  | 0.560433  | -1.011398 |
| Mg11 | -0.402394 | 3.033931  | -1.316550 |
| Mg12 | 1.270242  | 2.692727  | 1.244982  |
| Mg13 | 3.015227  | -1.915698 | -2.210041 |
| Mg14 | -3.623925 | 2.726157  | -1.187749 |
| Mg15 | 1.567347  | -3.825085 | -0.251591 |

|      |           |           |           |
|------|-----------|-----------|-----------|
| Mg16 | -4.828288 | 0.010146  | -1.628333 |
| Mg17 | -3.065621 | -2.454095 | -1.804122 |
| Mg18 | 4.164601  | -2.216096 | 0.520102  |
| Mg19 | 3.354637  | 0.281241  | 2.136946  |
| Mg20 | 0.034673  | 0.145077  | 2.509011  |
| Mg21 | 4.326496  | 2.858258  | 0.969774  |
| Mg22 | -4.386347 | -1.860675 | 0.758255  |
| Mg23 | -1.882570 | 2.325552  | 1.397922  |

@mg23-isomer26 bp86/6-31G(d) Etot=-4602.165521 Eb=-15.35

|      |           |           |           |
|------|-----------|-----------|-----------|
| Mg1  | -1.253929 | 0.167984  | 0.395377  |
| Mg2  | 1.710692  | -0.203628 | 0.292482  |
| Mg3  | -3.974442 | 1.376266  | 1.175426  |
| Mg4  | 4.021632  | 1.211844  | 1.628960  |
| Mg5  | 3.200981  | -2.397790 | -1.779529 |
| Mg6  | 4.779129  | 0.053235  | -1.210124 |
| Mg7  | 0.703728  | 1.165569  | 2.824641  |
| Mg8  | 0.306082  | 2.620808  | -1.174764 |
| Mg9  | 0.085922  | -2.153599 | -1.674622 |
| Mg10 | 1.888195  | 0.327742  | -2.674850 |
| Mg11 | -1.290823 | -3.562502 | 0.652656  |
| Mg12 | 1.694261  | -3.495338 | 0.564627  |
| Mg13 | -3.054133 | -1.484461 | 2.089778  |
| Mg14 | 4.267185  | -1.838562 | 1.068970  |
| Mg15 | -1.477092 | 0.342139  | -2.648568 |
| Mg16 | -5.432362 | -1.131589 | 0.368648  |
| Mg17 | -2.724796 | 2.902942  | -1.144848 |
| Mg18 | -2.976854 | -1.913524 | -1.246078 |
| Mg19 | 0.155506  | -1.826419 | 2.558967  |
| Mg20 | -4.495969 | 0.638333  | -1.888390 |
| Mg21 | 1.781382  | 3.474515  | 1.376520  |
| Mg22 | 3.308532  | 2.580549  | -1.029731 |
| Mg23 | -1.222827 | 3.145488  | 1.474451  |

@mg23-isomer27 bp86/6-31G(d) Etot=-4602.165376 Eb=-15.34

|      |           |           |           |
|------|-----------|-----------|-----------|
| Mg1  | 2.379750  | 0.182325  | 1.043208  |
| Mg2  | 0.111275  | 3.142005  | -1.186371 |
| Mg3  | -0.436397 | 0.916472  | -3.238069 |
| Mg4  | -2.689699 | 1.652015  | -1.259470 |
| Mg5  | 2.032279  | -1.683514 | -1.571474 |
| Mg6  | -2.847506 | -0.039447 | 1.830901  |
| Mg7  | 1.238343  | 3.053602  | 1.604726  |
| Mg8  | 4.587292  | -2.013558 | 0.232507  |
| Mg9  | 2.249106  | 1.227551  | -2.038521 |
| Mg10 | 1.800328  | -1.581952 | 3.567483  |
| Mg11 | -0.025994 | -2.002827 | -3.810015 |
| Mg12 | 5.027890  | 0.941743  | -0.269278 |
| Mg13 | -4.943565 | -0.423524 | -0.322748 |
| Mg14 | -3.356521 | -2.826222 | 0.504793  |
| Mg15 | 1.908314  | -3.188966 | 1.006503  |
| Mg16 | -0.334432 | 0.038851  | -0.154296 |
| Mg17 | -4.697784 | 2.316353  | 0.950739  |
| Mg18 | -0.505541 | -3.164963 | -0.823027 |
| Mg19 | -2.443587 | -1.226415 | -2.095553 |
| Mg20 | -0.753124 | -2.324495 | 2.139906  |
| Mg21 | -1.684762 | 2.877868  | 1.329874  |
| Mg22 | 3.464799  | 3.485706  | -0.357288 |
| Mg23 | -0.080462 | 0.641392  | 2.915470  |

@mg23-isomer28 bp86/6-31G(d) Etot=-4602.165194 Eb=-15.34

|     |          |           |           |
|-----|----------|-----------|-----------|
| Mg1 | 1.749345 | -1.108017 | -1.372295 |
| Mg2 | 4.401783 | -2.012662 | 0.316221  |
| Mg3 | 2.079144 | -0.177109 | 1.830905  |
| Mg4 | 1.288004 | -2.950668 | 0.989526  |

|      |           |           |           |
|------|-----------|-----------|-----------|
| Mg5  | -1.078620 | 0.288286  | 3.329387  |
| Mg6  | -1.011003 | 0.127116  | -2.822383 |
| Mg7  | -2.628112 | 2.199455  | -0.822868 |
| Mg8  | 4.989150  | -0.084855 | -1.952051 |
| Mg9  | -4.176105 | -0.021884 | -1.827266 |
| Mg10 | -0.759501 | -0.006448 | 0.219568  |
| Mg11 | -3.739455 | 0.068497  | 1.297987  |
| Mg12 | 0.257392  | 2.610329  | -1.531571 |
| Mg13 | -2.864182 | -2.231156 | -3.318013 |
| Mg14 | -1.713884 | -2.461057 | 1.861810  |
| Mg15 | 0.495024  | 2.391710  | 1.657558  |
| Mg16 | -2.617827 | 2.702660  | 2.317288  |
| Mg17 | -0.808889 | -2.746952 | -1.193888 |
| Mg18 | -3.753305 | -2.544105 | -0.337942 |
| Mg19 | 5.427743  | 0.686454  | 0.941848  |
| Mg20 | 2.879465  | 1.785546  | -0.406817 |
| Mg21 | 0.612370  | -2.117597 | 3.778963  |
| Mg22 | 2.124367  | 1.067360  | -3.337561 |
| Mg23 | -1.152904 | 4.535097  | 0.381595  |

@mg23-isomer29 bp86/6-31G(d) Etot=-4602.164401 Eb=-15.32

|      |           |           |           |
|------|-----------|-----------|-----------|
| Mg1  | 1.562279  | -3.519915 | 0.277338  |
| Mg2  | 3.283873  | -1.346420 | 1.720302  |
| Mg3  | 4.472957  | -2.610912 | -0.773153 |
| Mg4  | 0.226760  | -1.528717 | 2.299489  |
| Mg5  | -1.341861 | -3.522903 | 0.742601  |
| Mg6  | -0.539104 | -2.814828 | -2.073733 |
| Mg7  | 1.529739  | 0.992511  | 1.134174  |
| Mg8  | 4.628434  | 1.453106  | 2.211295  |
| Mg9  | -2.917839 | -1.291500 | 2.171245  |
| Mg10 | -3.505561 | -2.329674 | -0.861366 |
| Mg11 | 1.766397  | -0.971026 | -1.287721 |
| Mg12 | 4.517623  | 0.570179  | -0.631582 |
| Mg13 | 3.328313  | 3.280047  | 0.177523  |
| Mg14 | -1.011182 | -0.096152 | -0.244599 |
| Mg15 | 1.658453  | 1.955946  | -2.017486 |
| Mg16 | -3.197441 | 0.341376  | -2.377531 |
| Mg17 | -0.204970 | -0.003414 | -3.506918 |
| Mg18 | -4.818601 | 0.103083  | 0.211538  |
| Mg19 | -4.165653 | 1.474098  | 2.759780  |
| Mg20 | -1.225962 | 1.377677  | 2.433257  |
| Mg21 | 0.013301  | 3.368494  | 0.170318  |
| Mg22 | -1.166138 | 2.656017  | -2.572931 |
| Mg23 | -2.893816 | 2.462927  | 0.038160  |

@mg23-isomer30 bp86/6-31G(d) Etot=-4602.162446 Eb=-15.26

|      |           |           |           |
|------|-----------|-----------|-----------|
| Mg1  | -0.849740 | 0.963752  | -3.600893 |
| Mg2  | -1.678049 | 2.471841  | -1.003290 |
| Mg3  | 0.213094  | 3.725946  | -3.056475 |
| Mg4  | 2.057826  | 1.556958  | -2.383621 |
| Mg5  | 0.730590  | -1.292898 | -2.492894 |
| Mg6  | 1.008841  | 3.464246  | 0.074495  |
| Mg7  | -4.195759 | 1.882388  | 0.567267  |
| Mg8  | -2.225646 | -0.552986 | -1.203791 |
| Mg9  | -3.874928 | -3.271238 | -0.808326 |
| Mg10 | -1.185684 | 2.412583  | 2.012654  |
| Mg11 | -0.726663 | -3.510082 | -1.054889 |
| Mg12 | 0.466655  | 0.394352  | 0.159201  |
| Mg13 | 3.346141  | -0.627035 | -0.839348 |
| Mg14 | 3.679990  | 2.067480  | 0.490010  |
| Mg15 | -5.197702 | -0.948719 | 0.346581  |
| Mg16 | 2.328209  | -3.587804 | -1.364031 |
| Mg17 | 1.750722  | 2.325696  | 2.849042  |
| Mg18 | -3.074079 | 0.155208  | 2.649672  |

|      |           |           |          |
|------|-----------|-----------|----------|
| Mg19 | -1.689733 | -2.063385 | 1.359806 |
| Mg20 | 0.064052  | -0.166119 | 3.169945 |
| Mg21 | 1.283064  | -2.350843 | 1.144112 |
| Mg22 | 3.171651  | -0.288953 | 2.301972 |
| Mg23 | 4.597149  | -2.760387 | 0.682803 |

@mg23-isomer31 bp86/6-31G(d) Etot=-4602.161463 Eb=-15.24

|      |           |           |           |
|------|-----------|-----------|-----------|
| Mg1  | 5.224842  | -2.849672 | 1.229560  |
| Mg2  | 2.835195  | -1.288667 | -0.601842 |
| Mg3  | -1.497356 | 3.910232  | 0.226865  |
| Mg4  | 0.249378  | 0.386606  | 0.016939  |
| Mg5  | 0.391324  | -2.757752 | 0.795355  |
| Mg6  | -0.249421 | -1.220857 | 3.315699  |
| Mg7  | 2.599478  | -1.317102 | 2.363867  |
| Mg8  | -3.472395 | 1.624447  | -0.041095 |
| Mg9  | 2.913263  | -1.148491 | -3.592610 |
| Mg10 | 1.215858  | 3.113403  | -1.300720 |
| Mg11 | -2.075507 | -3.456370 | -0.821283 |
| Mg12 | -2.357242 | -1.118174 | 1.114371  |
| Mg13 | -1.624881 | 2.470768  | -2.271331 |
| Mg14 | -5.924710 | -0.093507 | 0.329694  |
| Mg15 | 3.551705  | 1.403120  | -2.128028 |
| Mg16 | -5.003407 | -2.889539 | -0.031803 |
| Mg17 | 0.983981  | 3.285126  | 1.703844  |
| Mg18 | 0.393592  | -2.238275 | -2.163039 |
| Mg19 | -1.365662 | 1.507551  | 2.313340  |
| Mg20 | 0.591093  | 0.687595  | -3.072097 |
| Mg21 | 1.596620  | 1.134811  | 3.650506  |
| Mg22 | -2.127408 | -0.512618 | -1.906525 |
| Mg23 | 3.151660  | 1.367365  | 0.870332  |

@mg23-isomer32 bp86/6-31G(d) Etot=-4602.161219 Eb=-15.23

|      |           |           |           |
|------|-----------|-----------|-----------|
| Mg1  | -1.750963 | 1.670135  | -1.079560 |
| Mg2  | -0.064172 | -0.242770 | -2.741709 |
| Mg3  | -1.590537 | 0.021310  | 1.693535  |
| Mg4  | -0.060666 | -2.733029 | 1.413025  |
| Mg5  | -4.875896 | 1.535259  | -0.840573 |
| Mg6  | 1.201348  | 2.485517  | -1.856099 |
| Mg7  | 3.052180  | -0.253566 | -2.164193 |
| Mg8  | -3.416149 | -0.150725 | -2.853045 |
| Mg9  | 1.124647  | 0.034114  | 0.116043  |
| Mg10 | -1.839189 | -1.862304 | -0.953972 |
| Mg11 | -3.251053 | 2.686202  | 1.475011  |
| Mg12 | 1.947296  | -0.780603 | 2.794222  |
| Mg13 | -3.375782 | -2.602656 | 1.652061  |
| Mg14 | 2.918193  | -3.306090 | 1.329143  |
| Mg15 | 4.299542  | -2.838793 | -1.230068 |
| Mg16 | -4.974128 | -1.566939 | -0.714385 |
| Mg17 | 1.182066  | -2.788553 | -1.427221 |
| Mg18 | 0.056760  | 2.756271  | 1.237905  |
| Mg19 | 4.236502  | 2.144988  | -0.788993 |
| Mg20 | 2.444288  | 4.289141  | 0.234916  |
| Mg21 | -4.673487 | 0.088351  | 1.868052  |
| Mg22 | 4.356786  | -0.566093 | 0.816748  |
| Mg23 | 3.052416  | 1.980832  | 2.019157  |

@mg23-isomer33 bp86/6-31G(d) Etot=-4602.156566 Eb=-15.10

|     |           |           |           |
|-----|-----------|-----------|-----------|
| Mg1 | -1.597715 | -3.143644 | 1.360310  |
| Mg2 | -1.320867 | -0.030018 | 0.852196  |
| Mg3 | -4.156135 | -1.317816 | 0.920112  |
| Mg4 | -1.131294 | -0.001216 | -2.319799 |
| Mg5 | -3.571989 | 1.406791  | 2.190679  |
| Mg6 | 2.309866  | -0.934811 | -2.814094 |
| Mg7 | 1.029128  | -1.631821 | 2.254292  |

|      |           |           |           |
|------|-----------|-----------|-----------|
| Mg8  | -2.768836 | -2.654213 | -1.381302 |
| Mg9  | -0.070575 | 2.745993  | -1.565298 |
| Mg10 | -2.888029 | 2.098276  | -0.891374 |
| Mg11 | 1.495969  | 0.281448  | -0.195068 |
| Mg12 | 4.719080  | -0.166505 | -1.139528 |
| Mg13 | 4.358377  | 2.162644  | 0.722674  |
| Mg14 | 1.128735  | 1.428391  | 2.610514  |
| Mg15 | 1.244318  | -4.319693 | 1.137807  |
| Mg16 | -1.067810 | 3.127311  | 1.486630  |
| Mg17 | 1.755252  | 3.632580  | 0.585949  |
| Mg18 | 2.966334  | 2.222397  | -2.038193 |
| Mg19 | -4.275793 | -0.242610 | -2.218552 |
| Mg20 | 3.912581  | -0.633305 | 1.828719  |
| Mg21 | 3.274122  | -2.674307 | -0.355830 |
| Mg22 | 0.298297  | -2.550667 | -1.100134 |
| Mg23 | -5.643015 | 1.194794  | 0.069290  |

@mg23-isomer34 bp86/6-31G(d) Etot=-4602.155792 Eb=-15.08

|      |           |           |           |
|------|-----------|-----------|-----------|
| Mg1  | 1.516497  | -3.133339 | -1.452776 |
| Mg2  | 1.676251  | -0.180967 | -0.320832 |
| Mg3  | 4.231237  | -1.500931 | -1.544684 |
| Mg4  | 1.886356  | -0.583079 | 2.642020  |
| Mg5  | 4.040286  | 1.540283  | -1.251262 |
| Mg6  | -3.972615 | 0.100067  | 2.396107  |
| Mg7  | -1.447534 | -3.334131 | -1.176872 |
| Mg8  | 3.219617  | -2.972689 | 1.071307  |
| Mg9  | 0.535673  | 2.084844  | 1.728659  |
| Mg10 | 3.558057  | 2.025813  | 1.703068  |
| Mg11 | -1.244246 | -0.070515 | 0.618430  |
| Mg12 | -5.601546 | -1.059598 | 0.236044  |
| Mg13 | -2.225583 | 1.632790  | -2.683337 |
| Mg14 | 0.861074  | 1.961303  | -2.419174 |
| Mg15 | 0.204807  | -2.865226 | 1.341898  |
| Mg16 | 2.081152  | 3.697873  | -0.358024 |
| Mg17 | -1.023650 | 3.362706  | -0.510923 |
| Mg18 | -2.432185 | 2.600154  | 2.069463  |
| Mg19 | 4.888239  | -0.575746 | 1.225396  |
| Mg20 | -3.346370 | -0.974165 | -1.684993 |
| Mg21 | -3.075229 | -2.548714 | 1.242437  |
| Mg22 | -0.271067 | -0.893352 | -2.521917 |
| Mg23 | -4.059221 | 1.686620  | -0.350034 |

@mg23-isomer35 bp86/6-31G(d) Etot=-4602.154048 Eb=-15.03

|      |           |           |           |
|------|-----------|-----------|-----------|
| Mg1  | -3.556561 | -2.254689 | -1.260642 |
| Mg2  | 0.622064  | -2.904122 | 1.500958  |
| Mg3  | -3.212203 | 0.908929  | -1.692455 |
| Mg4  | -0.874775 | 2.018526  | 1.365241  |
| Mg5  | -0.145791 | 1.522136  | -1.956768 |
| Mg6  | -0.811475 | -3.651285 | -1.183803 |
| Mg7  | -2.358735 | -3.146234 | 1.410648  |
| Mg8  | 1.729733  | 0.236569  | 1.168539  |
| Mg9  | -1.026084 | -0.684766 | -0.059555 |
| Mg10 | 1.417090  | 3.350193  | -0.014069 |
| Mg11 | -3.921871 | -0.401150 | 1.072669  |
| Mg12 | 4.581494  | 0.089880  | 2.535088  |
| Mg13 | 3.584865  | -2.502795 | 1.242167  |
| Mg14 | 1.588289  | -1.605380 | -1.360234 |
| Mg15 | 4.328295  | 2.413256  | 0.599279  |
| Mg16 | 5.136420  | -0.466874 | -0.290876 |
| Mg17 | -1.092363 | -0.768818 | 2.931767  |
| Mg18 | -4.055219 | 2.618673  | 0.608750  |
| Mg19 | -3.061903 | 1.554725  | 3.306290  |
| Mg20 | 2.870589  | 1.133426  | -1.724520 |
| Mg21 | -1.205247 | -1.325172 | -3.107184 |

|      |           |          |           |
|------|-----------|----------|-----------|
| Mg22 | 1.209947  | 0.128794 | -4.171314 |
| Mg23 | -1.746559 | 3.736176 | -0.919978 |

@mg23-isomer36 bp86/6-31G(d) Etot=-4602.153228 Eb=-15.01

|      |           |           |           |
|------|-----------|-----------|-----------|
| Mg1  | -3.890338 | 0.751213  | 1.623321  |
| Mg2  | -3.445469 | 2.712709  | -0.849444 |
| Mg3  | 0.614310  | -1.858771 | -1.926691 |
| Mg4  | 2.883993  | -3.078032 | -0.066062 |
| Mg5  | -0.852909 | 4.050717  | -1.404797 |
| Mg6  | -0.960380 | 2.691042  | 1.307102  |
| Mg7  | 3.113547  | -1.174538 | 2.460129  |
| Mg8  | -1.532984 | -0.038682 | -0.137126 |
| Mg9  | 3.552288  | -1.659147 | -2.655845 |
| Mg10 | 1.768259  | 3.125560  | -0.076092 |
| Mg11 | 3.468977  | 1.184903  | -1.764799 |
| Mg12 | -4.589027 | -0.102606 | -1.391698 |
| Mg13 | 1.505538  | 2.077769  | 2.854256  |
| Mg14 | 0.223622  | -2.811826 | 1.169506  |
| Mg15 | -2.131039 | -2.947164 | -0.938867 |
| Mg16 | -2.058894 | -0.666862 | -3.026839 |
| Mg17 | 0.252730  | 1.410084  | -2.184818 |
| Mg18 | -2.593089 | -2.234325 | 1.966556  |
| Mg19 | 1.503209  | -0.012017 | 0.303621  |
| Mg20 | 4.111801  | 1.531030  | 1.178435  |
| Mg21 | 4.990999  | -1.010757 | -0.042336 |
| Mg22 | -5.349036 | -1.897525 | 0.811416  |
| Mg23 | -0.586105 | -0.042773 | 2.791071  |

@mg23-isomer37 bp86/6-31G(d) Etot=-4602.143997 Eb=-14.76

|      |           |           |           |
|------|-----------|-----------|-----------|
| Mg1  | -0.461943 | 0.962949  | -0.172277 |
| Mg2  | 0.359340  | 3.439427  | 1.632002  |
| Mg3  | 2.262053  | 0.979677  | 1.663076  |
| Mg4  | -2.370134 | -1.100939 | 1.242821  |
| Mg5  | 1.710184  | -3.279114 | -1.422840 |
| Mg6  | -2.876751 | 1.908361  | 1.654403  |
| Mg7  | -1.875178 | 3.619402  | -0.691300 |
| Mg8  | -3.008578 | 0.634332  | -1.765321 |
| Mg9  | -0.432923 | 0.666697  | 2.919388  |
| Mg10 | 0.675808  | -1.676979 | 1.094690  |
| Mg11 | 3.766474  | -1.704753 | 0.423310  |
| Mg12 | -0.766661 | -1.518719 | -1.751823 |
| Mg13 | 0.489121  | -6.074426 | -0.281820 |
| Mg14 | 2.384402  | -4.318860 | 1.247812  |
| Mg15 | 2.092216  | 0.111322  | -1.453053 |
| Mg16 | -1.468350 | -3.929024 | 0.187987  |
| Mg17 | -5.145142 | -0.058628 | 0.280977  |
| Mg18 | 3.940093  | 2.821869  | -2.282292 |
| Mg19 | -3.724800 | -2.345583 | -1.190562 |
| Mg20 | 1.091822  | 3.224310  | -1.360580 |
| Mg21 | 4.807125  | 1.104317  | -0.018888 |
| Mg22 | 3.389693  | 3.737273  | 0.603128  |
| Mg23 | -4.837870 | 2.797088  | -0.558837 |

@mg23-isomer38 bp86/6-31G(d) Etot=-4602.140266 Eb=-14.66

|      |           |           |           |
|------|-----------|-----------|-----------|
| Mg1  | 0.633436  | 1.459602  | -1.105375 |
| Mg2  | -1.360352 | 3.470049  | 0.105178  |
| Mg3  | 2.537662  | 0.391540  | 1.308447  |
| Mg4  | 4.023795  | 3.155914  | 0.624698  |
| Mg5  | 3.396791  | 2.160715  | -2.096171 |
| Mg6  | 1.612875  | 4.471901  | -0.744905 |
| Mg7  | -4.462465 | 2.718523  | -0.342615 |
| Mg8  | -0.393942 | -1.472706 | -1.160475 |
| Mg9  | 0.858513  | -2.156866 | 1.551789  |
| Mg10 | -5.028252 | -0.242368 | 0.634354  |



|      |           |           |           |
|------|-----------|-----------|-----------|
| Mg11 | 1.246477  | 3.173637  | 1.909470  |
| Mg12 | -3.415551 | -2.275016 | -1.054884 |
| Mg13 | 2.536925  | -0.792254 | -1.747861 |
| Mg14 | 4.978960  | 0.286409  | -0.315087 |
| Mg15 | -2.246486 | 0.707066  | -0.852196 |
| Mg16 | -1.158824 | -4.219704 | 0.196653  |
| Mg17 | 3.670716  | -2.647691 | 0.445015  |
| Mg18 | 1.678753  | -5.263647 | 0.946994  |
| Mg19 | -2.320132 | -1.564067 | 1.606959  |
| Mg20 | -3.079074 | 1.591520  | 2.128855  |
| Mg21 | -0.324508 | 0.629687  | 1.780644  |
| Mg22 | -4.928149 | 0.177763  | -2.328277 |
| Mg23 | 1.542830  | -3.760008 | -1.491209 |

@mg23-isomer39 bp86/6-31G(d) Etot=-4602.137385 Eb=-14.58

|      |           |           |           |
|------|-----------|-----------|-----------|
| Mg1  | -0.316454 | -0.000487 | 1.664138  |
| Mg2  | -2.961131 | -1.553996 | 1.378277  |
| Mg3  | -0.281539 | -3.104457 | 1.518159  |
| Mg4  | 2.326585  | -1.492309 | 1.575119  |
| Mg5  | 2.325972  | 1.491610  | 1.574022  |
| Mg6  | -0.281850 | 3.103347  | 1.518508  |
| Mg7  | -2.961331 | 1.553073  | 1.379079  |
| Mg8  | 2.721695  | -4.628348 | 1.184137  |
| Mg9  | 2.721447  | 4.627831  | 1.184667  |
| Mg10 | -5.716393 | -0.001149 | 1.030637  |
| Mg11 | -1.916983 | 0.000300  | -1.183655 |
| Mg12 | 0.679628  | 1.470844  | -1.100321 |
| Mg13 | 0.680271  | -1.469332 | -1.099180 |
| Mg14 | -4.663630 | 1.515298  | -1.288193 |
| Mg15 | -4.663287 | -1.515645 | -1.289253 |
| Mg16 | -2.009095 | -3.177549 | -0.990070 |
| Mg17 | 0.761536  | -4.586032 | -0.940792 |
| Mg18 | 3.570731  | -2.730754 | -0.959136 |
| Mg19 | 3.091756  | 0.000521  | -2.396648 |
| Mg20 | 3.570490  | 2.731504  | -0.959399 |
| Mg21 | 0.760403  | 4.587393  | -0.939473 |
| Mg22 | -2.010235 | 3.178075  | -0.988948 |
| Mg23 | 4.571416  | 0.000264  | 0.128325  |

@mg23-isomer40 bp86/6-31G(d) Etot=-4602.135899 Eb=-14.54

|      |           |           |           |
|------|-----------|-----------|-----------|
| Mg1  | 0.866630  | -0.441046 | -0.117651 |
| Mg2  | 0.012802  | -0.288791 | 2.850141  |
| Mg3  | -1.732878 | 0.199327  | -1.279662 |
| Mg4  | -2.663798 | 3.334401  | -0.935041 |
| Mg5  | 4.182714  | -0.107478 | -0.109991 |
| Mg6  | -0.492705 | -2.989162 | 1.499997  |
| Mg7  | -4.395845 | -1.102709 | -2.151437 |
| Mg8  | -4.420053 | 1.175604  | 0.021595  |
| Mg9  | -0.329626 | -2.748019 | -1.613609 |
| Mg10 | 2.516557  | -1.729057 | 1.998037  |
| Mg11 | -3.023025 | -3.101143 | -0.265338 |
| Mg12 | -2.680356 | -0.753260 | 1.797606  |
| Mg13 | 2.043677  | 1.787617  | 1.523210  |
| Mg14 | 0.442296  | 2.678724  | -1.118038 |
| Mg15 | 3.624499  | 2.768380  | -0.842460 |
| Mg16 | 2.164192  | 5.021368  | 0.454434  |
| Mg17 | 1.802922  | -4.387054 | 0.092654  |
| Mg18 | 2.763089  | -2.262625 | -1.950951 |
| Mg19 | -5.539117 | -1.598073 | 0.529044  |
| Mg20 | -1.304045 | 2.002374  | 1.362333  |
| Mg21 | 4.595142  | -3.175482 | 0.262087  |
| Mg22 | 2.293671  | 0.635026  | -2.526241 |
| Mg23 | -0.726743 | 5.081079  | 0.519281  |

@mg23-isomer41 bp86/6-31G(d) Etot=-4602.135047 Eb=-14.51

|      |           |           |           |
|------|-----------|-----------|-----------|
| Mg1  | 0.857100  | -0.050025 | -1.484671 |
| Mg2  | -1.829925 | -0.191784 | 0.019146  |
| Mg3  | 3.055381  | 0.798174  | 2.295855  |
| Mg4  | 1.036983  | -1.408564 | 1.381566  |
| Mg5  | 4.514351  | 1.999313  | -0.077606 |
| Mg6  | 3.972737  | -1.032623 | 0.031662  |
| Mg7  | 1.803839  | 2.804408  | -1.383995 |
| Mg8  | -4.347702 | 1.278787  | -1.398611 |
| Mg9  | -1.237698 | 2.219202  | -1.769064 |
| Mg10 | 3.612203  | 0.620504  | -2.544388 |
| Mg11 | -2.239114 | -0.606637 | -2.761752 |
| Mg12 | -0.413631 | 4.398095  | 0.235223  |
| Mg13 | -4.812002 | 0.052544  | 1.341755  |
| Mg14 | -2.028781 | 0.034432  | 2.823090  |
| Mg15 | 3.937370  | -4.097442 | 0.492626  |
| Mg16 | 0.979456  | -4.514939 | 0.909693  |
| Mg17 | 1.973010  | -2.865611 | -1.476074 |
| Mg18 | 0.339124  | 1.550193  | 1.291977  |
| Mg19 | -4.635327 | -1.714355 | -1.065410 |
| Mg20 | -3.168137 | -2.527576 | 1.454712  |
| Mg21 | -1.088683 | -3.009592 | -0.767580 |
| Mg22 | 2.566179  | 3.669697  | 1.488472  |
| Mg23 | -2.846732 | 2.593798  | 0.963375  |

@mg23-isomer42 bp86/6-31G(d) Etot=-4602.123350 Eb=-14.20

|      |           |           |           |
|------|-----------|-----------|-----------|
| Mg1  | -0.052155 | -1.997890 | -2.030044 |
| Mg2  | -3.253259 | -1.750779 | -2.598081 |
| Mg3  | -3.270996 | 2.107659  | 0.448145  |
| Mg4  | 3.020856  | -2.213496 | -1.450690 |
| Mg5  | -0.305550 | 3.096167  | -0.544428 |
| Mg6  | -1.667791 | 0.633959  | -1.727920 |
| Mg7  | -0.832641 | -2.030396 | 2.968331  |
| Mg8  | -6.167853 | 0.900933  | 0.772885  |
| Mg9  | -5.287071 | -1.714521 | -0.308948 |
| Mg10 | 1.585113  | 4.979973  | 0.776196  |
| Mg11 | 4.169825  | 0.556958  | 0.700614  |
| Mg12 | 1.927132  | -0.736654 | 2.497641  |
| Mg13 | -2.153607 | -2.153993 | 0.205587  |
| Mg14 | 1.434832  | 0.304326  | -0.844443 |
| Mg15 | 6.026842  | -1.376802 | -0.753787 |
| Mg16 | -0.743854 | 0.604789  | 1.416131  |
| Mg17 | 1.884410  | 2.272294  | 1.823974  |
| Mg18 | 4.179883  | 0.571062  | -2.417616 |
| Mg19 | -4.845953 | 0.821744  | -2.034436 |
| Mg20 | 1.004687  | -2.986034 | 0.682671  |
| Mg21 | -3.652600 | -0.385930 | 2.197663  |
| Mg22 | 4.101299  | -2.556172 | 1.366965  |
| Mg23 | 2.898451  | 3.052802  | -1.146409 |

@mg23-isomer43 bp86/6-31G(d) Etot=-4602.118420 Eb=-14.06

|      |           |           |           |
|------|-----------|-----------|-----------|
| Mg1  | 0.163149  | 0.631233  | 1.688167  |
| Mg2  | -1.992056 | -0.510205 | -0.263995 |
| Mg3  | -2.580775 | -0.535472 | 2.664016  |
| Mg4  | 0.742095  | -1.632361 | -1.208652 |
| Mg5  | -5.797512 | 0.373482  | -1.027952 |
| Mg6  | -3.924433 | -1.483424 | -2.410790 |
| Mg7  | 3.053466  | -0.452127 | -2.726223 |
| Mg8  | 2.646596  | 0.820510  | -0.186863 |
| Mg9  | -5.097055 | 3.165521  | -0.120379 |
| Mg10 | -5.095836 | 0.887842  | 1.801494  |
| Mg11 | -0.197303 | -2.587709 | 1.470374  |
| Mg12 | -4.515697 | -1.939937 | 0.593940  |
| Mg13 | 3.640125  | -2.402882 | -0.272801 |

|      |           |           |           |
|------|-----------|-----------|-----------|
| Mg14 | -2.438832 | 2.229401  | 0.925055  |
| Mg15 | 2.317416  | -1.308230 | 2.377860  |
| Mg16 | 5.790895  | -0.394305 | -1.176564 |
| Mg17 | 5.404329  | 2.181103  | 0.506782  |
| Mg18 | 4.617086  | 2.161664  | -2.366984 |
| Mg19 | -1.783805 | -3.444144 | -1.037804 |
| Mg20 | -3.173321 | 1.601065  | -1.996688 |
| Mg21 | 5.139893  | -0.607936 | 1.684930  |
| Mg22 | 3.110262  | 1.763989  | 2.495431  |
| Mg23 | -0.028686 | 1.482920  | -1.412353 |

@mg23-isomer44 bp86/6-31G(d) Etot=-4602.110301 Eb=-13.84

|      |           |           |           |
|------|-----------|-----------|-----------|
| Mg1  | -0.216124 | -0.985039 | -2.405034 |
| Mg2  | -0.894968 | 1.872285  | -1.700000 |
| Mg3  | -1.326188 | 2.487180  | 1.521142  |
| Mg4  | 2.133494  | 1.120451  | -2.260757 |
| Mg5  | -2.462963 | -0.363904 | -0.109980 |
| Mg6  | 2.539926  | -1.778645 | -1.140479 |
| Mg7  | -2.892988 | -3.385194 | 1.091018  |
| Mg8  | -5.146819 | -2.535874 | -0.771634 |
| Mg9  | 0.605657  | 0.268512  | 0.422076  |
| Mg10 | -4.358151 | 1.696301  | 2.134544  |
| Mg11 | 5.131771  | -2.122375 | 0.561206  |
| Mg12 | 5.077680  | -0.218716 | 2.961786  |
| Mg13 | 4.939728  | -0.176039 | -2.116266 |
| Mg14 | 1.612778  | 3.303223  | 0.006098  |
| Mg15 | -5.578563 | 0.499790  | -0.382201 |
| Mg16 | -4.960460 | -1.288342 | 1.940072  |
| Mg17 | -2.276813 | -3.170148 | -1.884023 |
| Mg18 | -1.062817 | 4.701923  | -0.416302 |
| Mg19 | 2.403298  | -1.521337 | 1.976465  |
| Mg20 | -0.033028 | -2.759406 | 0.202790  |
| Mg21 | 3.634393  | 1.089418  | 0.428175  |
| Mg22 | -3.609119 | 2.928606  | -0.486765 |
| Mg23 | 6.740273  | 0.337332  | 0.428070  |

@mg23-isomer45 bp86/6-31G(d) Etot=-4602.108510 Eb=-13.79

|      |           |           |           |
|------|-----------|-----------|-----------|
| Mg1  | 0.405196  | -0.198541 | 2.363367  |
| Mg2  | 3.279573  | -1.243771 | 1.893279  |
| Mg3  | 3.875409  | -2.897308 | -0.656562 |
| Mg4  | 2.549977  | 1.789790  | 1.339863  |
| Mg5  | -0.345041 | 2.023252  | 0.273117  |
| Mg6  | 1.365642  | -1.052928 | -0.717032 |
| Mg7  | -0.719494 | 0.229938  | -2.427886 |
| Mg8  | 1.816911  | 1.819099  | -1.872180 |
| Mg9  | 0.061418  | -3.155671 | 1.390226  |
| Mg10 | -3.119729 | 1.625899  | -1.003957 |
| Mg11 | -2.970012 | 3.798417  | 1.200630  |
| Mg12 | -3.504196 | -1.271063 | -2.190277 |
| Mg13 | -4.795514 | -1.008814 | 0.777793  |
| Mg14 | -2.663809 | 1.015316  | 2.440719  |
| Mg15 | 2.760165  | -4.294214 | 1.838397  |
| Mg16 | 4.305119  | 0.102941  | -0.780968 |
| Mg17 | -5.904633 | 0.511917  | -1.547167 |
| Mg18 | -0.798587 | -2.909606 | -1.880440 |
| Mg19 | -5.386411 | 1.905907  | 1.297578  |
| Mg20 | 1.435216  | -4.734760 | -0.911966 |
| Mg21 | 4.250564  | 3.131342  | -0.735989 |
| Mg22 | 5.846425  | 5.801254  | -0.459337 |
| Mg23 | -1.744189 | -0.988396 | 0.368794  |

@mg24-isomer01 bp86/6-31G(d) Etot=-4802.292625 Eb=-16.21

|     |           |           |           |
|-----|-----------|-----------|-----------|
| Mg1 | -0.002104 | -0.892736 | -3.120981 |
| Mg2 | 1.490059  | 1.722266  | -2.745062 |

|      |           |           |           |
|------|-----------|-----------|-----------|
| Mg3  | 2.975037  | 2.910681  | -0.392152 |
| Mg4  | 1.547342  | 1.997618  | 2.275021  |
| Mg5  | -1.505095 | -0.019451 | -0.092146 |
| Mg6  | -4.571422 | 1.208122  | 1.409212  |
| Mg7  | -4.309191 | 0.562499  | -1.661475 |
| Mg8  | -2.982435 | -0.802657 | 2.865860  |
| Mg9  | 0.002065  | 2.879125  | -0.256927 |
| Mg10 | 1.506448  | -0.018464 | -0.089554 |
| Mg11 | -4.420556 | -1.657979 | 0.378458  |
| Mg12 | 0.000118  | -0.703070 | 2.692061  |
| Mg13 | -1.542976 | 1.997074  | 2.274285  |
| Mg14 | 2.983898  | -0.805892 | 2.864395  |
| Mg15 | -2.661048 | -2.007034 | -2.057762 |
| Mg16 | -1.504297 | -2.881834 | 1.100863  |
| Mg17 | 4.309137  | 0.558902  | -1.661976 |
| Mg18 | -2.970734 | 2.911850  | -0.391222 |
| Mg19 | 1.500261  | -2.880805 | 1.098830  |
| Mg20 | -1.489059 | 1.725141  | -2.745679 |
| Mg21 | -0.002811 | -3.338010 | -1.469108 |
| Mg22 | 4.418967  | -1.662036 | 0.375314  |
| Mg23 | 4.572802  | 1.204415  | 1.407402  |
| Mg24 | 2.655593  | -2.007724 | -2.057656 |

@mg24-isomer02 bp86/6-31G(d) Etot=-4802.291734 Eb=-16.18

|      |           |           |           |
|------|-----------|-----------|-----------|
| Mg1  | -1.505902 | -0.032633 | 0.131969  |
| Mg2  | 1.542312  | 1.761771  | -2.453389 |
| Mg3  | 1.546963  | -3.019027 | -0.710793 |
| Mg4  | 0.156543  | -0.398239 | 3.009046  |
| Mg5  | -2.987589 | -1.148146 | -2.714074 |
| Mg6  | 4.580362  | 1.006887  | -1.452245 |
| Mg7  | -0.019316 | 3.074479  | -0.121686 |
| Mg8  | -1.535177 | 1.711011  | -2.440779 |
| Mg9  | 4.153063  | 0.705962  | 1.681237  |
| Mg10 | -0.010174 | -3.132971 | 1.845183  |
| Mg11 | -4.266655 | 0.711179  | 1.631678  |
| Mg12 | -1.520928 | -3.043044 | -0.720992 |
| Mg13 | -3.029422 | 2.937502  | 0.027983  |
| Mg14 | -4.617588 | 0.989769  | -1.495645 |
| Mg15 | -1.510904 | 2.110850  | 2.450040  |
| Mg16 | 3.001641  | -1.129625 | -2.729627 |
| Mg17 | 1.521840  | 0.043502  | 0.076269  |
| Mg18 | -4.478589 | -1.765398 | -0.177047 |
| Mg19 | -2.708212 | -1.883253 | 2.229718  |
| Mg20 | 3.018024  | 2.979389  | 0.033406  |
| Mg21 | 2.726704  | -1.963582 | 2.154928  |
| Mg22 | 1.441868  | 2.311572  | 2.445764  |
| Mg23 | 4.490284  | -1.766084 | -0.215178 |
| Mg24 | 0.010851  | -1.061873 | -2.485766 |

@mg24-isomer03 bp86/6-31G(d) Etot=-4802.289018 Eb=-16.11

|      |           |           |           |
|------|-----------|-----------|-----------|
| Mg1  | 1.444390  | -0.032967 | 0.011247  |
| Mg2  | -1.445628 | 0.068333  | 0.031230  |
| Mg3  | 4.593579  | 1.628801  | 0.348360  |
| Mg4  | 3.624556  | 0.425460  | -2.236810 |
| Mg5  | 0.076607  | -2.243518 | 1.760522  |
| Mg6  | -2.391596 | -1.292190 | 3.208950  |
| Mg7  | 2.636768  | -2.983648 | 0.390120  |
| Mg8  | 0.153174  | 0.499031  | 3.066633  |
| Mg9  | 1.944152  | 2.871030  | -0.869981 |
| Mg10 | -4.339615 | -0.697999 | -1.595327 |
| Mg11 | -2.547451 | 1.047177  | -3.181119 |
| Mg12 | -0.961310 | 3.256436  | -1.818968 |
| Mg13 | -0.439876 | 2.776754  | 1.026365  |
| Mg14 | 0.445713  | 0.784136  | -2.793427 |

|      |           |           |           |
|------|-----------|-----------|-----------|
| Mg15 | 3.234386  | -0.506294 | 2.374784  |
| Mg16 | -1.409678 | -1.660394 | -2.494422 |
| Mg17 | -4.607601 | -0.362954 | 1.314472  |
| Mg18 | -3.552891 | 2.174373  | -0.354498 |
| Mg19 | 5.025092  | -1.274080 | -0.112145 |
| Mg20 | 1.617935  | -1.976672 | -2.489809 |
| Mg21 | -2.741337 | -2.634924 | 0.344482  |
| Mg22 | 2.391910  | 2.363324  | 2.214650  |
| Mg23 | -2.675404 | 1.554549  | 2.627656  |
| Mg24 | -0.075874 | -3.783765 | -0.772966 |

@mg24-isomer04 bp86/6-31G(d) Etot=-4802.286775 Eb=-16.05

|      |           |           |           |
|------|-----------|-----------|-----------|
| Mg1  | -0.126497 | 2.640338  | -2.950267 |
| Mg2  | 2.477616  | -2.485947 | -1.279948 |
| Mg3  | -1.404899 | 1.524540  | 1.250271  |
| Mg4  | -4.443952 | 0.027092  | -1.677091 |
| Mg5  | -2.856231 | 2.633114  | -1.188805 |
| Mg6  | 1.097181  | -0.013418 | 0.035557  |
| Mg7  | -1.347535 | 0.040028  | -1.832576 |
| Mg8  | -0.108016 | -2.507953 | -3.067017 |
| Mg9  | -0.128569 | 3.836548  | -0.232263 |
| Mg10 | 1.587216  | -2.449315 | 1.776950  |
| Mg11 | -4.513277 | 1.493416  | 1.050860  |
| Mg12 | 2.443372  | 2.545700  | -1.161527 |
| Mg13 | 4.413200  | -1.500452 | 0.846521  |
| Mg14 | 4.406453  | 1.493018  | 0.911260  |
| Mg15 | -4.505496 | -1.545646 | 0.982683  |
| Mg16 | -1.398917 | -1.610890 | 1.205624  |
| Mg17 | 1.505279  | 0.073569  | -3.067825 |
| Mg18 | -3.050513 | -0.079017 | 3.300365  |
| Mg19 | 2.998128  | -0.057299 | 3.133438  |
| Mg20 | 4.268870  | 0.052494  | -1.775983 |
| Mg21 | -0.093956 | -3.809873 | -0.402561 |
| Mg22 | -2.836779 | -2.586607 | -1.295834 |
| Mg23 | 0.054627  | -0.084574 | 3.567200  |
| Mg24 | 1.562693  | 2.371133  | 1.870969  |

@mg24-isomer05 bp86/6-31G(d) Etot=-4802.286619 Eb=-16.05

|      |           |           |           |
|------|-----------|-----------|-----------|
| Mg1  | 1.627578  | 0.124784  | -0.093080 |
| Mg2  | 0.891254  | 2.837847  | -1.252454 |
| Mg3  | -0.012626 | 0.309919  | -2.763637 |
| Mg4  | 2.197222  | -1.949725 | -2.271542 |
| Mg5  | -1.296745 | 0.228306  | 0.178508  |
| Mg6  | 4.687051  | -0.569293 | -0.947627 |
| Mg7  | 4.125685  | 0.434801  | 1.865908  |
| Mg8  | -0.789476 | -2.607240 | -2.887824 |
| Mg9  | -2.239138 | 2.297341  | -1.705208 |
| Mg10 | -2.928849 | -0.497159 | -3.035357 |
| Mg11 | 3.068436  | -2.328520 | 0.938184  |
| Mg12 | 3.892578  | 2.391850  | -0.287504 |
| Mg13 | -4.531522 | -0.846112 | 1.626739  |
| Mg14 | -1.113696 | 1.401403  | 3.052748  |
| Mg15 | -4.803079 | 0.493488  | -1.023491 |
| Mg16 | 2.955298  | 1.036470  | -2.800787 |
| Mg17 | -0.976597 | 3.518281  | 0.967726  |
| Mg18 | 1.098430  | -0.556062 | 2.838262  |
| Mg19 | 0.792546  | -3.525288 | 2.717207  |
| Mg20 | -1.701568 | -1.822588 | 2.360717  |
| Mg21 | -3.688894 | 2.048792  | 1.299053  |
| Mg22 | 1.646935  | 2.439768  | 1.916179  |
| Mg23 | 0.083217  | -2.609067 | -0.050949 |
| Mg24 | -2.984040 | -2.251998 | -0.641770 |

@mg24-isomer06 bp86/6-31G(d) Etot=-4802.285157 Eb=-16.01

|      |           |           |           |
|------|-----------|-----------|-----------|
| Mg1  | 3.659910  | 2.391157  | -1.695959 |
| Mg2  | 1.585796  | 3.947694  | -0.058858 |
| Mg3  | 4.407322  | -0.416617 | -0.752312 |
| Mg4  | 3.194041  | 1.656247  | 1.278380  |
| Mg5  | 2.505311  | -0.080709 | -3.073436 |
| Mg6  | 0.460585  | 2.083467  | -1.997689 |
| Mg7  | 3.954648  | -1.194322 | 2.095193  |
| Mg8  | -0.505292 | -0.309423 | -3.394532 |
| Mg9  | 0.191674  | 2.056027  | 1.775264  |
| Mg10 | -1.556052 | 3.506042  | -0.208726 |
| Mg11 | 0.917537  | -2.670999 | -2.433000 |
| Mg12 | 2.720986  | -2.947364 | -0.002608 |
| Mg13 | 1.188006  | -0.305932 | -0.064405 |
| Mg14 | -1.733769 | 0.268337  | -0.586318 |
| Mg15 | 1.321381  | -2.704409 | 2.764715  |
| Mg16 | 1.651951  | 0.157294  | 3.509695  |
| Mg17 | -2.165071 | -2.418111 | -2.171132 |
| Mg18 | -2.781498 | 1.848654  | 2.148108  |
| Mg19 | -0.376283 | -2.977682 | 0.272051  |
| Mg20 | -4.396510 | 2.210110  | -0.441212 |
| Mg21 | -1.059615 | -0.732530 | 2.336370  |
| Mg22 | -4.775523 | -0.698956 | -1.455296 |
| Mg23 | -4.966646 | -0.145338 | 1.496428  |
| Mg24 | -3.442889 | -2.522637 | 0.659280  |

@mg24-isomer07 bp86/6-31G(d) Etot=-4802.284871 Eb=-16.01

|      |           |           |           |
|------|-----------|-----------|-----------|
| Mg1  | -1.009033 | -0.005923 | 0.003765  |
| Mg2  | 0.762731  | 2.868177  | -0.564743 |
| Mg3  | 2.074778  | 0.163612  | -0.192844 |
| Mg4  | 4.081062  | 2.631197  | -0.413924 |
| Mg5  | 0.908969  | -2.695069 | 0.055312  |
| Mg6  | -3.533578 | 1.143190  | 1.417389  |
| Mg7  | -3.787421 | -1.960169 | 2.001481  |
| Mg8  | -2.091821 | -2.903639 | -0.460080 |
| Mg9  | -0.630738 | 2.186553  | 2.203960  |
| Mg10 | -2.336553 | -0.501445 | -2.802854 |
| Mg11 | -0.124604 | -2.658119 | -2.805273 |
| Mg12 | -1.396256 | 2.470600  | -2.717608 |
| Mg13 | -2.137166 | 3.454969  | -0.041874 |
| Mg14 | 1.030061  | -0.473823 | 2.549776  |
| Mg15 | -4.125193 | 1.860179  | -1.616727 |
| Mg16 | 4.661369  | 0.328461  | 1.729917  |
| Mg17 | 2.352649  | 2.331244  | 2.131520  |
| Mg18 | -1.824659 | -0.215052 | 3.560315  |
| Mg19 | -4.451515 | -0.954331 | -0.681464 |
| Mg20 | 2.758105  | -1.935898 | -2.321209 |
| Mg21 | 4.031116  | -2.422373 | 0.617536  |
| Mg22 | -0.958341 | -2.820245 | 2.349892  |
| Mg23 | 5.142127  | -0.160488 | -1.238797 |
| Mg24 | 0.603908  | 0.268393  | -2.763465 |

@mg24-isomer08 bp86/6-31G(d) Etot=-4802.284344 Eb=-15.99

|      |           |           |           |
|------|-----------|-----------|-----------|
| Mg1  | -2.032936 | 0.060056  | 3.058351  |
| Mg2  | 3.286751  | 2.713789  | 0.434012  |
| Mg3  | 0.659559  | 1.722958  | 2.635090  |
| Mg4  | 1.104111  | -0.429850 | -3.571261 |
| Mg5  | 3.971319  | -2.287303 | 1.396868  |
| Mg6  | -0.068041 | -2.267462 | -1.507546 |
| Mg7  | -2.467749 | 2.476620  | -1.050050 |
| Mg8  | 4.941209  | 0.238530  | -0.046321 |
| Mg9  | -3.111213 | -2.539881 | -1.453586 |
| Mg10 | 0.684876  | -1.286905 | 2.308110  |
| Mg11 | 2.985285  | -1.764056 | -1.424078 |
| Mg12 | -1.804069 | -0.162635 | -2.918400 |

|      |           |           |           |
|------|-----------|-----------|-----------|
| Mg13 | 1.302542  | 0.382176  | -0.194520 |
| Mg14 | -4.321415 | 1.344625  | 1.195623  |
| Mg15 | 0.328428  | 3.349718  | 0.013392  |
| Mg16 | -4.225959 | -1.635384 | 1.174983  |
| Mg17 | -1.522217 | -3.148082 | 1.103592  |
| Mg18 | -4.562956 | 0.091741  | -1.438932 |
| Mg19 | 3.301023  | 1.309743  | -2.292138 |
| Mg20 | -1.889664 | 2.993147  | 1.991936  |
| Mg21 | 1.423018  | -3.718927 | 0.658326  |
| Mg22 | -1.526006 | -0.102438 | 0.185160  |
| Mg23 | 0.178739  | 2.259296  | -2.795625 |
| Mg24 | 3.365366  | 0.400525  | 2.537014  |

@mg24-isomer09 bp86/6-31G(d) Etot=-4802.284173 Eb=-15.99

|      |           |           |           |
|------|-----------|-----------|-----------|
| Mg1  | -0.704195 | -1.237350 | 2.575057  |
| Mg2  | 2.462026  | -1.126115 | 2.600401  |
| Mg3  | 0.746324  | 1.459079  | 2.626236  |
| Mg4  | -2.304469 | 1.317928  | 2.770125  |
| Mg5  | -3.769204 | -2.328822 | 0.456476  |
| Mg6  | 0.853119  | -3.751825 | 2.376571  |
| Mg7  | -0.843794 | 3.643268  | 1.367514  |
| Mg8  | 3.758845  | 1.442374  | 1.718734  |
| Mg9  | -4.836874 | 0.214368  | 1.500762  |
| Mg10 | -0.770240 | -3.025035 | -0.063233 |
| Mg11 | -2.575061 | -2.137779 | -2.369781 |
| Mg12 | 1.362589  | 0.143681  | -0.099015 |
| Mg13 | 1.903273  | 3.217475  | 0.084227  |
| Mg14 | -1.590171 | -0.010825 | -0.077584 |
| Mg15 | -4.517655 | 0.075004  | -1.578080 |
| Mg16 | 4.206715  | 1.718668  | -1.306505 |
| Mg17 | -3.458312 | 2.490676  | -0.031080 |
| Mg18 | 4.698198  | -0.988784 | 0.360189  |
| Mg19 | 2.247138  | -2.803926 | -0.198203 |
| Mg20 | 0.439639  | -1.637153 | -2.545582 |
| Mg21 | -0.605941 | 2.593401  | -1.366713 |
| Mg22 | -1.605507 | 0.485487  | -3.284303 |
| Mg23 | 3.431667  | -0.935279 | -2.382797 |
| Mg24 | 1.471892  | 1.181484  | -3.133415 |

@mg24-isomer10 bp86/6-31G(d) Etot=-4802.283252 Eb=-15.96

|      |           |           |           |
|------|-----------|-----------|-----------|
| Mg1  | -1.577315 | 1.282704  | -1.597723 |
| Mg2  | 0.447696  | -2.801098 | -2.552847 |
| Mg3  | -0.973150 | -3.497872 | 0.018653  |
| Mg4  | 4.045945  | 1.745975  | -1.140549 |
| Mg5  | 1.239451  | 0.692600  | 2.991954  |
| Mg6  | 3.236367  | -1.533388 | 2.417037  |
| Mg7  | -2.321154 | -1.582725 | -2.227118 |
| Mg8  | 1.059738  | 0.022972  | -0.094213 |
| Mg9  | 0.292331  | -2.211638 | 2.485600  |
| Mg10 | -0.734291 | 4.057124  | -0.693686 |
| Mg11 | -1.694798 | -0.723673 | 0.685343  |
| Mg12 | 4.027287  | 1.202579  | 1.741999  |
| Mg13 | 1.244079  | 2.291558  | -2.332178 |
| Mg14 | 4.655771  | -1.087984 | -0.179709 |
| Mg15 | -1.685444 | -0.106846 | 3.621209  |
| Mg16 | 2.770840  | -0.680648 | -2.498648 |
| Mg17 | 1.799964  | 2.962908  | 0.654054  |
| Mg18 | -4.665894 | 0.163021  | -1.234118 |
| Mg19 | 2.095793  | -2.888896 | -0.020054 |
| Mg20 | -3.720709 | 2.810066  | -0.016343 |
| Mg21 | 0.015283  | -0.131289 | -3.668680 |
| Mg22 | -4.315989 | 0.350526  | 1.849628  |
| Mg23 | -1.033359 | 2.119662  | 1.558817  |
| Mg24 | -4.208446 | -2.455639 | 0.231573  |

@mg24-isomer11 bp86/6-31G(d) Etot=-4802.283222 Eb=-15.96

|      |           |           |           |
|------|-----------|-----------|-----------|
| Mg1  | 0.470279  | 2.840856  | 1.126479  |
| Mg2  | 3.982018  | -1.395748 | 1.640135  |
| Mg3  | 3.136349  | 1.613952  | 2.239763  |
| Mg4  | -3.773126 | -2.826073 | 0.331159  |
| Mg5  | -1.753957 | -2.268484 | 2.430663  |
| Mg6  | -4.235508 | 2.183726  | -0.149528 |
| Mg7  | 5.086567  | 1.004471  | 0.039471  |
| Mg8  | -2.324646 | 2.440355  | 2.137527  |
| Mg9  | -2.530280 | -2.166141 | -2.393553 |
| Mg10 | -0.635088 | -3.171484 | -0.284898 |
| Mg11 | -3.996442 | -0.144073 | 1.887758  |
| Mg12 | 1.526616  | 0.000764  | 0.189942  |
| Mg13 | 2.320336  | -2.812970 | -0.876311 |
| Mg14 | 3.190507  | 0.357494  | -2.345151 |
| Mg15 | 1.157396  | -2.497521 | 2.077181  |
| Mg16 | 0.460068  | 2.017746  | -2.006594 |
| Mg17 | -2.444414 | 1.188195  | -2.594116 |
| Mg18 | -4.708632 | -0.501365 | -1.256072 |
| Mg19 | 3.067325  | 3.005115  | -0.624661 |
| Mg20 | 0.228855  | -1.092937 | -2.445716 |
| Mg21 | -0.112851 | 0.361710  | 2.784170  |
| Mg22 | -1.667480 | 3.571695  | -0.736762 |
| Mg23 | 5.066791  | -1.733478 | -1.193323 |
| Mg24 | -1.510683 | 0.024196  | 0.022438  |

@mg24-isomer12 bp86/6-31G(d) Etot=-4802.281137 Eb=-15.91

|      |           |           |           |
|------|-----------|-----------|-----------|
| Mg1  | -1.581084 | 0.028647  | -0.335637 |
| Mg2  | 1.395430  | 0.216462  | -0.051848 |
| Mg3  | -0.108434 | -0.663762 | -2.989650 |
| Mg4  | -3.054841 | -2.264995 | 1.413223  |
| Mg5  | 1.656340  | -2.557110 | -1.276968 |
| Mg6  | 3.882551  | 1.825678  | -1.075535 |
| Mg7  | 2.951483  | -0.331999 | -2.941221 |
| Mg8  | 4.330653  | 0.591268  | 1.770470  |
| Mg9  | 2.779075  | -2.042005 | 1.739897  |
| Mg10 | -1.727485 | 1.907590  | -2.870758 |
| Mg11 | -4.831982 | 0.116276  | 1.134092  |
| Mg12 | -1.341952 | -2.894578 | -1.286522 |
| Mg13 | -2.979580 | 2.529318  | 0.939047  |
| Mg14 | -0.380216 | 2.843172  | 2.655205  |
| Mg15 | -4.423900 | 1.402579  | -1.599966 |
| Mg16 | -0.136999 | -1.829506 | 1.831506  |
| Mg17 | -4.199853 | -1.623978 | -1.372958 |
| Mg18 | 4.543910  | -1.233009 | -0.607829 |
| Mg19 | 1.274787  | 2.098020  | -2.879090 |
| Mg20 | -0.134762 | 2.873715  | -0.349953 |
| Mg21 | 0.348593  | -4.464614 | 0.724171  |
| Mg22 | -1.957870 | 0.273976  | 2.808593  |
| Mg23 | 2.356696  | 2.792583  | 1.428562  |
| Mg24 | 1.339443  | 0.406272  | 3.193168  |

@mg24-isomer13 bp86/6-31G(d) Etot=-4802.280521 Eb=-15.89

|      |           |           |           |
|------|-----------|-----------|-----------|
| Mg1  | -1.151074 | -0.349037 | -0.159291 |
| Mg2  | 1.579143  | -0.288487 | -2.125608 |
| Mg3  | -0.044133 | 1.228800  | 3.607138  |
| Mg4  | -3.245077 | 3.004564  | -1.095411 |
| Mg5  | 1.017845  | 1.517975  | 0.726129  |
| Mg6  | 3.572842  | -2.563946 | -1.309440 |
| Mg7  | 1.567759  | -1.605390 | 0.815591  |
| Mg8  | 4.486544  | 0.347296  | -1.874549 |
| Mg9  | 4.089556  | 2.002601  | 0.561772  |
| Mg10 | -2.444426 | -0.406924 | 2.643530  |



|      |           |           |           |
|------|-----------|-----------|-----------|
| Mg11 | -3.619686 | 0.018905  | -1.983904 |
| Mg12 | -1.828630 | 2.388236  | 1.498733  |
| Mg13 | -1.033858 | -1.168562 | -3.307077 |
| Mg14 | -0.782792 | 1.671527  | -2.420355 |
| Mg15 | -4.266221 | -1.864496 | 0.475092  |
| Mg16 | 2.329029  | 2.745372  | -1.786806 |
| Mg17 | 4.835047  | -0.911431 | 0.884546  |
| Mg18 | -2.499127 | -3.081442 | -1.507459 |
| Mg19 | 2.769601  | 0.207856  | 2.918852  |
| Mg20 | 0.487197  | -3.196240 | -1.528033 |
| Mg21 | -4.544280 | 1.048633  | 0.761737  |
| Mg22 | -0.325413 | 3.993234  | -0.586330 |
| Mg23 | 0.203650  | -1.679191 | 3.581780  |
| Mg24 | -1.153495 | -3.059850 | 1.209363  |

@mg24-isomer14 bp86/6-31G(d) Etot=-4802.279897 Eb=-15.88

|      |           |           |           |
|------|-----------|-----------|-----------|
| Mg1  | -1.317840 | 0.023023  | -3.112996 |
| Mg2  | -4.147430 | 0.473883  | 1.011782  |
| Mg3  | -1.908439 | 1.422848  | 3.112609  |
| Mg4  | 0.815254  | 3.996221  | -0.288403 |
| Mg5  | -1.105628 | 3.061202  | -2.473806 |
| Mg6  | 0.278790  | -0.658595 | 3.364231  |
| Mg7  | -3.600270 | -2.508132 | 0.494487  |
| Mg8  | -1.978659 | 2.908975  | 0.486414  |
| Mg9  | 1.101563  | 1.242025  | -1.545406 |
| Mg10 | 5.318876  | -0.018269 | 0.666393  |
| Mg11 | 3.534969  | 2.395257  | 0.238784  |
| Mg12 | -1.317993 | -2.714500 | -1.696384 |
| Mg13 | -3.934635 | -1.050083 | -2.013029 |
| Mg14 | 4.080963  | 0.348472  | -2.048324 |
| Mg15 | -3.735499 | 1.812192  | -1.718759 |
| Mg16 | 4.084610  | -2.419444 | -0.784911 |
| Mg17 | -0.638169 | -2.865981 | 1.332968  |
| Mg18 | 3.281588  | 0.400436  | 2.895651  |
| Mg19 | -1.233249 | -0.079525 | 0.091893  |
| Mg20 | 1.331396  | -3.785173 | -0.744453 |
| Mg21 | 0.725026  | 1.845474  | 1.722332  |
| Mg22 | 1.382598  | -1.486925 | -2.682988 |
| Mg23 | 1.688478  | -0.977538 | 0.579354  |
| Mg24 | -2.706298 | -1.365843 | 3.112559  |

@mg24-isomer15 bp86/6-31G(d) Etot=-4802.279562 Eb=-15.87

|      |           |           |           |
|------|-----------|-----------|-----------|
| Mg1  | 4.203287  | -0.455085 | 1.756246  |
| Mg2  | -3.117574 | 2.652339  | 0.994030  |
| Mg3  | -4.241399 | -2.064308 | -0.207570 |
| Mg4  | 1.004367  | 2.148281  | -2.161002 |
| Mg5  | -0.276359 | -2.670049 | 1.079721  |
| Mg6  | 2.589052  | 3.982363  | -0.248475 |
| Mg7  | -1.633337 | -2.847218 | -1.694428 |
| Mg8  | 2.665452  | -0.228528 | -2.914353 |
| Mg9  | -0.213677 | 3.104598  | 0.428796  |
| Mg10 | -3.393272 | -0.552600 | -2.741468 |
| Mg11 | 4.107085  | 1.414603  | -0.690850 |
| Mg12 | 1.378507  | -0.938279 | 3.058253  |
| Mg13 | -0.330076 | -0.427727 | -2.999301 |
| Mg14 | -1.531580 | -1.471755 | 3.541948  |
| Mg15 | 4.415539  | -1.658585 | -0.986948 |
| Mg16 | -1.601722 | -0.184735 | 0.028408  |
| Mg17 | 2.159378  | 1.988371  | 1.976369  |
| Mg18 | -0.736847 | 1.268078  | 2.731037  |
| Mg19 | 1.362639  | -0.121755 | -0.007321 |
| Mg20 | -2.058629 | 2.049529  | -1.951829 |
| Mg21 | -3.913887 | -0.095144 | 2.181089  |
| Mg22 | 1.367116  | -2.772016 | -1.670957 |

|      |           |           |           |
|------|-----------|-----------|-----------|
| Mg23 | 2.698993  | -3.008440 | 1.078678  |
| Mg24 | -4.903055 | 0.888062  | -0.580073 |

@mg24-isomer16 bp86/6-31G(d) Etot=-4802.279188 Eb=-15.86

|      |           |           |           |
|------|-----------|-----------|-----------|
| Mg1  | 2.490318  | 2.460427  | -2.396894 |
| Mg2  | -0.530327 | 2.905377  | -2.015532 |
| Mg3  | -4.936001 | -0.303307 | -1.272043 |
| Mg4  | -1.701174 | -1.166630 | 1.093108  |
| Mg5  | 0.908313  | 0.107892  | -0.149513 |
| Mg6  | 2.956480  | -0.644931 | -2.360538 |
| Mg7  | 0.481269  | 0.587501  | -3.652246 |
| Mg8  | 2.478457  | -2.791060 | -0.098079 |
| Mg9  | -1.868272 | 0.115218  | -1.801303 |
| Mg10 | -1.379615 | 1.981274  | 0.749837  |
| Mg11 | 3.873725  | 1.197177  | 0.023632  |
| Mg12 | 0.986418  | -1.867285 | 2.451066  |
| Mg13 | -0.324476 | -3.807319 | 0.410756  |
| Mg14 | -0.881604 | 0.431881  | 3.449137  |
| Mg15 | 1.444171  | 3.141822  | 0.333832  |
| Mg16 | 2.071736  | 1.006476  | 2.630958  |
| Mg17 | -4.187084 | 0.756353  | 1.491473  |
| Mg18 | 0.226647  | -2.119610 | -2.132218 |
| Mg19 | -4.841900 | -2.362982 | 0.956381  |
| Mg20 | 0.065916  | 3.258573  | 3.116908  |
| Mg21 | 4.040769  | -1.190757 | 2.098051  |
| Mg22 | 5.184318  | -1.506354 | -0.568815 |
| Mg23 | -2.725476 | -2.767306 | -1.278084 |
| Mg24 | -3.832610 | 2.577569  | -1.079876 |

@mg24-isomer17 bp86/6-31G(d) Etot=-4802.278859 Eb=-15.85

|      |           |           |           |
|------|-----------|-----------|-----------|
| Mg1  | 2.389359  | -3.166207 | 1.116592  |
| Mg2  | -0.212484 | -2.978908 | -0.413967 |
| Mg3  | 2.979148  | -0.772585 | 2.939588  |
| Mg4  | 4.792698  | -1.423072 | 0.654599  |
| Mg5  | 0.045134  | -1.802161 | 2.322020  |
| Mg6  | -2.832850 | -2.351179 | 1.119146  |
| Mg7  | 2.462417  | -1.965883 | -1.769750 |
| Mg8  | -2.881063 | -2.629723 | -1.982819 |
| Mg9  | -0.510598 | -0.965925 | -2.761635 |
| Mg10 | -2.206571 | 0.050777  | 3.073621  |
| Mg11 | 3.811180  | 1.607230  | 1.191414  |
| Mg12 | -5.222844 | -1.487030 | -0.557873 |
| Mg13 | 0.659971  | 1.199328  | 2.744583  |
| Mg14 | -1.359722 | 0.224169  | 0.152801  |
| Mg15 | 4.490807  | 0.491858  | -1.583766 |
| Mg16 | 1.488365  | 0.134736  | -0.035802 |
| Mg17 | -4.346302 | 0.919294  | 0.977117  |
| Mg18 | -3.409027 | 0.409481  | -2.116929 |
| Mg19 | 1.928566  | 0.553147  | -3.449676 |
| Mg20 | -1.847871 | 2.918822  | 2.423118  |
| Mg21 | -2.731907 | 3.008265  | -0.583524 |
| Mg22 | 2.590454  | 2.844338  | -1.484751 |
| Mg23 | 0.285208  | 3.112532  | 0.367603  |
| Mg24 | -0.362066 | 2.068697  | -2.341710 |

@mg24-isomer18 bp86/6-31G(d) Etot=-4802.277616 Eb=-15.82

|     |           |           |           |
|-----|-----------|-----------|-----------|
| Mg1 | 3.490134  | 2.978742  | 1.646018  |
| Mg2 | -0.726059 | 2.970086  | -0.765935 |
| Mg3 | -2.535293 | 1.596936  | -2.909856 |
| Mg4 | -1.882381 | -1.359078 | -2.562909 |
| Mg5 | 1.527848  | -0.386012 | -0.211153 |
| Mg6 | 4.810923  | -1.719957 | -0.222623 |
| Mg7 | 4.938529  | 1.288996  | -0.350828 |
| Mg8 | 2.396204  | -3.340589 | 0.270143  |

|      |           |           |           |
|------|-----------|-----------|-----------|
| Mg9  | 0.351299  | 0.754893  | -2.772778 |
| Mg10 | -1.418806 | 0.020126  | 0.167256  |
| Mg11 | 3.569862  | -0.067442 | 2.103981  |
| Mg12 | -0.561260 | -3.033786 | -0.111930 |
| Mg13 | 0.988801  | -2.292568 | -2.647285 |
| Mg14 | -3.639633 | -2.448684 | -0.061499 |
| Mg15 | 0.807091  | 1.595272  | 2.022911  |
| Mg16 | 0.666325  | -1.595205 | 2.378856  |
| Mg17 | -3.895827 | 2.574537  | -0.445640 |
| Mg18 | 3.388718  | -0.172381 | -2.527819 |
| Mg19 | -2.144325 | -2.557188 | 2.476383  |
| Mg20 | 2.224893  | 2.596186  | -1.072834 |
| Mg21 | -1.424854 | 0.121965  | 3.632085  |
| Mg22 | -4.154342 | 0.095932  | 1.588889  |
| Mg23 | -4.637126 | -0.082248 | -1.561869 |
| Mg24 | -2.140722 | 2.461465  | 1.938436  |

@mg24-isomer19 bp86/6-31G(d) Etot=-4802.276849 Eb=-15.80

|      |           |           |           |
|------|-----------|-----------|-----------|
| Mg1  | -4.668290 | -0.902702 | -1.538334 |
| Mg2  | 0.697015  | 0.837155  | 3.572337  |
| Mg3  | 2.377768  | -3.269413 | 0.601325  |
| Mg4  | -0.522755 | -2.818454 | 0.452041  |
| Mg5  | 4.664741  | 0.922531  | -0.308378 |
| Mg6  | 3.389405  | -1.485358 | -1.642660 |
| Mg7  | 0.352533  | 2.402048  | -2.103477 |
| Mg8  | -3.524220 | -2.706819 | 0.593884  |
| Mg9  | 1.067472  | -2.073322 | 3.085132  |
| Mg10 | -2.093024 | 3.570263  | -0.948704 |
| Mg11 | 1.227903  | -0.121625 | 0.167752  |
| Mg12 | 3.823651  | -1.026313 | 1.880434  |
| Mg13 | -1.940433 | -2.297749 | -2.274243 |
| Mg14 | 0.201547  | 2.631513  | 1.033207  |
| Mg15 | -4.679284 | -0.111753 | 1.422196  |
| Mg16 | -1.629698 | -0.659136 | 2.243182  |
| Mg17 | 2.750959  | 3.286392  | -0.628101 |
| Mg18 | 0.511761  | -0.536562 | -2.885139 |
| Mg19 | -1.653660 | 0.375587  | -0.759947 |
| Mg20 | 2.989476  | 1.859042  | 2.015097  |
| Mg21 | -2.681520 | 2.151466  | 1.775931  |
| Mg22 | 0.931295  | -3.358955 | -2.142620 |
| Mg23 | -4.692275 | 2.067853  | -0.752546 |
| Mg24 | 3.099632  | 1.264312  | -2.858369 |

@mg24-isomer20 bp86/6-31G(d) Etot=-4802.276634 Eb=-15.79

|      |           |           |           |
|------|-----------|-----------|-----------|
| Mg1  | -2.320577 | 0.877694  | -1.413724 |
| Mg2  | 0.229029  | 0.241430  | -3.082650 |
| Mg3  | 0.427287  | -2.618308 | -2.148055 |
| Mg4  | 2.559105  | 3.497104  | 0.059307  |
| Mg5  | -1.164773 | -1.849025 | 2.671498  |
| Mg6  | 1.941524  | -1.868148 | 2.458209  |
| Mg7  | -2.219899 | -1.501118 | -3.313197 |
| Mg8  | 0.397543  | -0.117238 | 0.149001  |
| Mg9  | 0.253034  | -3.574960 | 0.674552  |
| Mg10 | -2.634322 | 3.539543  | 0.341838  |
| Mg11 | -2.102752 | -2.003733 | -0.273570 |
| Mg12 | 2.746260  | 1.017237  | 1.769465  |
| Mg13 | -0.007412 | 2.765480  | -1.249405 |
| Mg14 | 4.661673  | 1.461427  | -0.572015 |
| Mg15 | -4.462095 | -1.197306 | 1.562748  |
| Mg16 | 2.588494  | 2.092096  | -2.670004 |
| Mg17 | 0.152100  | 2.819155  | 1.754257  |
| Mg18 | -4.814373 | -1.026828 | -1.438019 |
| Mg19 | 2.820965  | -0.736368 | -1.694936 |
| Mg20 | -4.888927 | 1.517282  | 0.349138  |

|      |           |           |           |
|------|-----------|-----------|-----------|
| Mg21 | 0.338465  | 0.490543  | 3.655086  |
| Mg22 | 3.050097  | -3.444276 | -0.224867 |
| Mg23 | -2.192405 | 0.842183  | 1.833823  |
| Mg24 | 4.641960  | -1.223868 | 0.801521  |

@mg24-isomer21 bp86/6-31G(d) Etot=-4802.276193 Eb=-15.78

|      |           |           |           |
|------|-----------|-----------|-----------|
| Mg1  | 2.264656  | -1.164780 | -2.798007 |
| Mg2  | -0.467211 | 0.418446  | 3.536956  |
| Mg3  | -1.368456 | 2.910508  | 2.324300  |
| Mg4  | 1.581106  | 2.078156  | 2.131763  |
| Mg5  | -3.180803 | -0.966338 | -2.380099 |
| Mg6  | -1.963919 | 1.820397  | -2.447705 |
| Mg7  | -0.476823 | -2.128458 | -1.345708 |
| Mg8  | 4.628791  | 0.272467  | -1.543573 |
| Mg9  | 1.176242  | 1.753092  | -2.861471 |
| Mg10 | 1.475728  | -0.026600 | -0.153020 |
| Mg11 | 2.186957  | -0.885347 | 2.732507  |
| Mg12 | 3.105396  | 2.684273  | -0.561313 |
| Mg13 | 1.605272  | -3.241549 | 0.566224  |
| Mg14 | 4.458212  | 0.861383  | 1.443800  |
| Mg15 | -1.296350 | -4.405237 | 0.416052  |
| Mg16 | -1.395531 | 0.379469  | 0.183673  |
| Mg17 | -3.526509 | -2.293901 | 0.419398  |
| Mg18 | -0.529103 | -0.456215 | -3.801357 |
| Mg19 | -4.918499 | 0.271114  | -0.350027 |
| Mg20 | -0.797948 | -1.998751 | 2.002275  |
| Mg21 | -3.421061 | 2.761762  | 0.055762  |
| Mg22 | -3.412759 | 0.256130  | 2.337776  |
| Mg23 | -0.038205 | 3.103281  | -0.425521 |
| Mg24 | 4.310818  | -2.003299 | 0.517314  |

@mg24-isomer22 bp86/6-31G(d) Etot=-4802.274714 Eb=-15.74

|      |           |           |           |
|------|-----------|-----------|-----------|
| Mg1  | 1.038316  | -0.190974 | 0.091472  |
| Mg2  | 2.513900  | -3.067382 | 0.658166  |
| Mg3  | 0.772704  | 2.925995  | -1.545734 |
| Mg4  | -1.702544 | -0.891799 | 1.171121  |
| Mg5  | -1.471606 | -1.988137 | -2.108122 |
| Mg6  | -0.007090 | 2.470756  | 1.359851  |
| Mg7  | 3.937221  | -0.586158 | 1.600972  |
| Mg8  | -0.441810 | -3.492990 | 0.406629  |
| Mg9  | 1.956426  | 0.973629  | 3.206488  |
| Mg10 | -3.588783 | -3.069207 | 0.046301  |
| Mg11 | 0.880648  | -0.131228 | -3.017057 |
| Mg12 | -1.562335 | 0.903768  | -1.382200 |
| Mg13 | -1.990376 | 3.802178  | -0.768268 |
| Mg14 | 3.544188  | -1.134416 | -1.559859 |
| Mg15 | -0.866033 | 0.565177  | 3.695932  |
| Mg16 | 5.364118  | 1.004302  | -0.485109 |
| Mg17 | 0.776778  | -1.899591 | 2.949450  |
| Mg18 | -4.845479 | -0.394537 | 1.002092  |
| Mg19 | -2.879212 | 1.826385  | 1.601940  |
| Mg20 | 2.901103  | 2.301996  | 0.614571  |
| Mg21 | 3.320114  | 1.741825  | -2.509649 |
| Mg22 | -4.297939 | -0.728994 | -1.932152 |
| Mg23 | -4.578573 | 2.124719  | -0.970662 |
| Mg24 | 1.226261  | -3.065317 | -2.126173 |

@mg24-isomer23 bp86/6-31G(d) Etot=-4802.273869 Eb=-15.72

|     |           |           |           |
|-----|-----------|-----------|-----------|
| Mg1 | 5.174929  | -0.549688 | 0.481607  |
| Mg2 | -2.259947 | -2.178604 | 1.677387  |
| Mg3 | 1.444247  | 2.302400  | 0.149311  |
| Mg4 | -3.840017 | 1.046749  | -0.158695 |
| Mg5 | -2.474794 | 0.746703  | 2.686807  |
| Mg6 | 0.263609  | 1.395704  | -2.628431 |

|      |           |           |           |
|------|-----------|-----------|-----------|
| Mg7  | -2.575579 | 2.800858  | -2.222436 |
| Mg8  | 4.318252  | 2.185760  | 1.531177  |
| Mg9  | -1.539042 | 2.965053  | 0.725501  |
| Mg10 | -4.308546 | -1.928701 | -0.831153 |
| Mg11 | 2.083508  | -0.596100 | -1.049150 |
| Mg12 | 1.478915  | -3.625637 | -1.697440 |
| Mg13 | 0.728277  | -2.552393 | 1.028525  |
| Mg14 | 2.360990  | -0.149890 | 2.067857  |
| Mg15 | -0.131338 | -0.946426 | 3.537438  |
| Mg16 | 4.115354  | -3.261548 | -0.031081 |
| Mg17 | 4.229655  | 1.654052  | -1.438882 |
| Mg18 | -5.002236 | -0.875267 | 1.923451  |
| Mg19 | -0.736430 | 0.031130  | 0.088835  |
| Mg20 | -1.422470 | -2.889250 | -1.204217 |
| Mg21 | -2.440196 | -0.248996 | -2.570568 |
| Mg22 | 0.371750  | 1.943718  | 2.952331  |
| Mg23 | -0.053938 | 4.237397  | -1.641619 |
| Mg24 | 0.215046  | -1.507024 | -3.376555 |

@mg24-isomer24 bp86/6-31G(d) Etot=-4802.271594 Eb=-15.66

|      |           |           |           |
|------|-----------|-----------|-----------|
| Mg1  | -4.359116 | -0.519055 | -1.486862 |
| Mg2  | 4.392845  | 1.410466  | -1.076204 |
| Mg3  | 5.317779  | -1.187888 | 0.233051  |
| Mg4  | -0.563418 | 2.824267  | 1.047054  |
| Mg5  | 0.437700  | -2.711346 | -0.361565 |
| Mg6  | -2.020222 | 3.985581  | -1.416459 |
| Mg7  | 2.890023  | -1.992345 | 1.834675  |
| Mg8  | -1.917645 | 0.826458  | 2.795972  |
| Mg9  | 0.624491  | 2.588760  | -1.722626 |
| Mg10 | 4.203994  | 0.876597  | 2.049758  |
| Mg11 | -3.627420 | 2.037737  | 0.161013  |
| Mg12 | -1.854096 | -1.902563 | -2.504131 |
| Mg13 | 1.227671  | 1.065874  | 2.944164  |
| Mg14 | 0.807141  | -3.105799 | -3.279408 |
| Mg15 | -4.504121 | -0.543487 | 1.491854  |
| Mg16 | 1.615555  | 0.219038  | 0.024045  |
| Mg17 | -2.140705 | 1.337630  | -2.788293 |
| Mg18 | 0.554420  | -0.157437 | -2.921939 |
| Mg19 | -1.327254 | -0.010900 | -0.108267 |
| Mg20 | 2.549079  | 3.079967  | 0.645799  |
| Mg21 | 3.180536  | -1.585007 | -1.852134 |
| Mg22 | -0.084844 | -1.693777 | 2.402474  |
| Mg23 | -2.536471 | -2.751998 | 0.498947  |
| Mg24 | -2.865920 | -2.090772 | 3.389081  |

@mg24-isomer25 bp86/6-31G(d) Etot=-4802.270582 Eb=-15.63

|      |           |           |           |
|------|-----------|-----------|-----------|
| Mg1  | 4.787154  | 0.661186  | 1.573391  |
| Mg2  | -2.903459 | 2.690147  | 1.383502  |
| Mg3  | 1.181425  | 1.842674  | -1.469915 |
| Mg4  | -1.828893 | 2.612068  | -1.417033 |
| Mg5  | -0.170785 | -0.742025 | -2.786870 |
| Mg6  | -4.796263 | -2.146278 | 0.743029  |
| Mg7  | -2.970810 | 0.431338  | -3.261946 |
| Mg8  | -3.259102 | -0.131481 | 2.413574  |
| Mg9  | -0.515779 | -0.972000 | 3.266587  |
| Mg10 | 0.116665  | 3.294533  | 0.942920  |
| Mg11 | -2.736470 | -2.034907 | -1.583198 |
| Mg12 | -0.432488 | 1.996777  | -4.039581 |
| Mg13 | 3.068121  | -3.793208 | -0.629028 |
| Mg14 | 0.060658  | -3.276551 | -1.093885 |
| Mg15 | 1.616119  | 0.693892  | 1.842192  |
| Mg16 | -4.076313 | 0.546138  | -0.503252 |
| Mg17 | 5.232062  | -1.734893 | -0.299038 |
| Mg18 | 3.226377  | 3.161354  | 0.636004  |

|      |           |           |           |
|------|-----------|-----------|-----------|
| Mg19 | 1.302619  | -2.492374 | 1.547133  |
| Mg20 | 4.477140  | 1.197821  | -1.324645 |
| Mg21 | -0.840973 | 1.948784  | 3.449669  |
| Mg22 | 2.153608  | -0.860477 | -0.838502 |
| Mg23 | -0.851588 | -0.037892 | 0.157503  |
| Mg24 | -1.839025 | -2.854625 | 1.291391  |

@mg24-isomer26 bp86/6-31G(d) Etot=-4802.270201 Eb=-15.62

|      |           |           |           |
|------|-----------|-----------|-----------|
| Mg1  | 0.188523  | 0.124704  | -3.712213 |
| Mg2  | 4.502609  | -0.825509 | -1.685105 |
| Mg3  | -0.038502 | 2.901422  | -2.672649 |
| Mg4  | -2.456402 | 1.000006  | -2.385264 |
| Mg5  | -1.532029 | -1.910331 | -2.222387 |
| Mg6  | -1.721951 | 2.919974  | -0.083081 |
| Mg7  | 1.563876  | -1.995323 | -1.980592 |
| Mg8  | -4.441801 | 1.715846  | -0.133739 |
| Mg9  | 1.308985  | 3.414090  | 0.011962  |
| Mg10 | 2.007798  | 0.875493  | -1.344285 |
| Mg11 | -4.509973 | -0.997863 | -1.516078 |
| Mg12 | -0.518560 | 0.004615  | 0.033449  |
| Mg13 | 3.563905  | -3.206187 | 0.038353  |
| Mg14 | 4.700365  | -0.581838 | 1.327579  |
| Mg15 | 4.500679  | 2.133941  | -0.156792 |
| Mg16 | -2.895449 | -2.717454 | 0.325305  |
| Mg17 | -0.242390 | 2.849101  | 2.562325  |
| Mg18 | 0.099960  | -3.588643 | 0.103006  |
| Mg19 | -4.986301 | -0.875146 | 1.473605  |
| Mg20 | 2.464131  | 1.413626  | 2.001650  |
| Mg21 | -2.490472 | 0.639582  | 2.205969  |
| Mg22 | 1.722768  | -1.404641 | 1.525472  |
| Mg23 | -1.047984 | -2.122079 | 2.538370  |
| Mg24 | 0.258218  | 0.232613  | 3.745140  |

@mg24-isomer27 bp86/6-31G(d) Etot=-4802.269682 Eb=-15.61

|      |           |           |           |
|------|-----------|-----------|-----------|
| Mg1  | -4.695734 | -0.666418 | -0.361716 |
| Mg2  | 1.116000  | 0.705299  | 2.734595  |
| Mg3  | -2.748909 | 0.523495  | -2.550134 |
| Mg4  | 3.529030  | -1.156855 | 2.093386  |
| Mg5  | -1.518821 | 3.056233  | -1.133841 |
| Mg6  | -1.531283 | 2.354811  | 2.130454  |
| Mg7  | -2.631510 | -2.156773 | 1.460569  |
| Mg8  | 1.034480  | 3.946332  | -2.425415 |
| Mg9  | -3.949179 | 0.412043  | 2.440684  |
| Mg10 | 3.356856  | 2.062319  | -1.528673 |
| Mg11 | -0.937833 | -3.606293 | -0.525709 |
| Mg12 | 1.847233  | -0.493372 | -0.504846 |
| Mg13 | 4.465698  | -2.663424 | -0.551457 |
| Mg14 | -3.228294 | -2.485869 | -2.120476 |
| Mg15 | -0.361063 | -1.750834 | -2.816111 |
| Mg16 | 0.991165  | 2.596419  | 0.428642  |
| Mg17 | -1.089106 | 0.032315  | 0.048873  |
| Mg18 | -1.362509 | -0.423419 | 3.703620  |
| Mg19 | 0.526592  | -2.169517 | 1.821088  |
| Mg20 | 0.336886  | 1.098453  | -2.620741 |
| Mg21 | -4.017993 | 2.179327  | 0.074946  |
| Mg22 | 1.809143  | -3.523920 | -1.405559 |
| Mg23 | 5.263105  | 0.184091  | -0.072274 |
| Mg24 | 3.796047  | 1.945558  | 1.680093  |

@mg24-isomer28 bp86/6-31G(d) Etot=-4802.269638 Eb=-15.61

|     |           |           |           |
|-----|-----------|-----------|-----------|
| Mg1 | 1.625028  | 1.588948  | 1.095752  |
| Mg2 | -2.292528 | -1.680630 | 2.145346  |
| Mg3 | -2.442190 | -2.417521 | -2.711731 |
| Mg4 | 3.055739  | -0.954328 | 1.952817  |

|      |           |           |           |
|------|-----------|-----------|-----------|
| Mg5  | 0.530086  | -2.552524 | 1.236321  |
| Mg6  | -0.250406 | -0.316927 | -3.004461 |
| Mg7  | 1.728590  | 1.915561  | -1.975415 |
| Mg8  | -2.660031 | 0.715223  | 4.004205  |
| Mg9  | -1.198678 | 2.419051  | 1.962189  |
| Mg10 | 0.210115  | 3.912753  | -0.358495 |
| Mg11 | 5.435700  | -1.750554 | -0.134514 |
| Mg12 | -3.777596 | 0.873855  | 1.077561  |
| Mg13 | -0.838045 | -0.021028 | -0.056643 |
| Mg14 | 3.230523  | -3.729601 | -0.014419 |
| Mg15 | 4.579801  | 1.173101  | 0.092998  |
| Mg16 | -1.050532 | 2.647533  | -2.920823 |
| Mg17 | 2.172036  | -0.805701 | -0.882830 |
| Mg18 | -2.709510 | 3.191020  | -0.526845 |
| Mg19 | 0.410976  | -3.107467 | -1.706280 |
| Mg20 | 3.364972  | 3.970507  | -0.070139 |
| Mg21 | -3.123234 | 0.541449  | -1.999792 |
| Mg22 | -2.001135 | -3.724607 | -0.051746 |
| Mg23 | 0.184898  | -0.131559 | 3.188295  |
| Mg24 | -4.184579 | -1.756554 | -0.341352 |

@mg24-isomer29 bp86/6-31G(d) Etot=-4802.269554 Eb=-15.60

|      |           |           |           |
|------|-----------|-----------|-----------|
| Mg1  | 4.091042  | -2.677498 | -1.124856 |
| Mg2  | 5.389115  | -0.035712 | -0.483956 |
| Mg3  | 2.884309  | -0.035621 | -2.279505 |
| Mg4  | -0.293311 | -0.057837 | -2.747444 |
| Mg5  | 3.952675  | 2.636912  | -0.941430 |
| Mg6  | 0.966139  | -2.311273 | -1.091276 |
| Mg7  | 1.052770  | 2.697605  | -2.004460 |
| Mg8  | 3.619908  | -1.464587 | 1.603502  |
| Mg9  | -1.862703 | -2.677884 | -2.336045 |
| Mg10 | 4.468149  | 1.608950  | 1.828203  |
| Mg11 | -1.909203 | 2.515217  | -2.509184 |
| Mg12 | 1.508072  | 0.771616  | 0.372641  |
| Mg13 | -3.646464 | -0.103506 | -2.029690 |
| Mg14 | -1.229329 | -3.860447 | 0.343113  |
| Mg15 | -1.387253 | -0.424807 | 0.001275  |
| Mg16 | 0.534148  | -1.939873 | 2.000052  |
| Mg17 | -0.942057 | 2.929099  | 0.348427  |
| Mg18 | 1.980214  | 0.620677  | 3.304794  |
| Mg19 | -3.976308 | -2.611620 | -0.222184 |
| Mg20 | -4.130868 | 2.608201  | -0.556939 |
| Mg21 | -1.057425 | 0.859438  | 2.666330  |
| Mg22 | -4.250394 | 0.145413  | 1.174433  |
| Mg23 | -2.484644 | -2.043762 | 2.400324  |
| Mg24 | -3.276584 | 2.851300  | 2.283877  |

@mg24-isomer30 bp86/6-31G(d) Etot=-4802.269243 Eb=-15.60

|      |           |           |           |
|------|-----------|-----------|-----------|
| Mg1  | -1.152085 | 2.842016  | 1.830910  |
| Mg2  | 2.184263  | -1.996419 | 1.574151  |
| Mg3  | 4.312165  | -0.253683 | -2.203504 |
| Mg4  | -3.855782 | 0.696724  | -1.802472 |
| Mg5  | -2.683013 | 3.233527  | -0.866120 |
| Mg6  | -0.724248 | 1.512557  | -2.612299 |
| Mg7  | 5.020632  | -1.262372 | 0.580674  |
| Mg8  | -2.455540 | 0.183802  | 3.047711  |
| Mg9  | 3.327794  | -2.930236 | -1.284655 |
| Mg10 | -2.489423 | -3.487340 | -0.154763 |
| Mg11 | -4.140949 | 1.811585  | 1.212980  |
| Mg12 | -0.888975 | -2.335004 | 2.097671  |
| Mg13 | 3.712540  | 0.485890  | 2.582303  |
| Mg14 | 0.533682  | 0.231914  | 2.940022  |
| Mg15 | -1.309220 | 0.256272  | 0.176602  |
| Mg16 | -1.404773 | -1.562339 | -2.300420 |

|      |           |           |           |
|------|-----------|-----------|-----------|
| Mg17 | 0.149892  | 3.784180  | -0.963089 |
| Mg18 | 1.381022  | -0.456751 | -1.133105 |
| Mg19 | -4.150929 | -1.274892 | 1.054018  |
| Mg20 | 2.403257  | 2.210359  | -2.204113 |
| Mg21 | 4.608159  | 1.784029  | -0.034689 |
| Mg22 | 1.710600  | 2.077720  | 0.892496  |
| Mg23 | 0.391848  | -3.387665 | -0.549727 |
| Mg24 | -4.480915 | -2.163872 | -1.880583 |

@mg24-isomer31 bp86/6-31G(d) Etot=-4802.268708 Eb=-15.58

|      |           |           |           |
|------|-----------|-----------|-----------|
| Mg1  | -0.272493 | 2.592396  | 1.421000  |
| Mg2  | 2.158053  | 3.370065  | -0.516729 |
| Mg3  | 1.690668  | -1.777926 | 2.544892  |
| Mg4  | -0.108267 | 1.911906  | -2.219589 |
| Mg5  | -2.219769 | -2.231204 | -1.800594 |
| Mg6  | -0.759244 | 4.432237  | -0.858791 |
| Mg7  | -3.241817 | -1.641275 | 0.975644  |
| Mg8  | 2.488768  | 0.577975  | -1.848758 |
| Mg9  | 4.573689  | -1.001075 | 1.504337  |
| Mg10 | -5.153563 | 0.716751  | 1.237254  |
| Mg11 | 2.287014  | 0.995363  | 1.443725  |
| Mg12 | 0.303638  | 0.659196  | 3.707037  |
| Mg13 | 0.255499  | -0.972964 | -3.153205 |
| Mg14 | -2.497005 | 0.849986  | 2.612776  |
| Mg15 | 4.862257  | 1.772198  | -0.099529 |
| Mg16 | 5.067001  | -0.984732 | -1.366288 |
| Mg17 | 0.381405  | -3.770526 | -2.213761 |
| Mg18 | 2.336291  | -2.188904 | -0.416895 |
| Mg19 | -4.791097 | -0.398540 | -1.435460 |
| Mg20 | -2.553209 | 0.430891  | -3.142918 |
| Mg21 | -0.461744 | -3.195914 | 0.638904  |
| Mg22 | -0.367703 | -0.217801 | 0.133350  |
| Mg23 | -1.231518 | -1.832066 | 3.285415  |
| Mg24 | -2.746856 | 1.903962  | -0.431817 |

@mg24-isomer32 bp86/6-31G(d) Etot=-4802.267399 Eb=-15.55

|      |           |           |           |
|------|-----------|-----------|-----------|
| Mg1  | 0.624058  | 0.244069  | -0.009962 |
| Mg2  | -1.778213 | 2.168068  | -0.039734 |
| Mg3  | -2.577978 | 0.838159  | 2.559290  |
| Mg4  | 0.727685  | 3.953273  | -0.075208 |
| Mg5  | 0.400819  | 0.002654  | 3.202336  |
| Mg6  | 3.067582  | -0.858836 | 1.774452  |
| Mg7  | 2.517221  | 2.034919  | 1.595452  |
| Mg8  | -2.564146 | 0.735214  | -2.586364 |
| Mg9  | 0.413893  | -0.123328 | -3.206061 |
| Mg10 | 4.933899  | 1.155081  | -0.018279 |
| Mg11 | -1.969021 | -1.285746 | 0.025454  |
| Mg12 | -4.639656 | 1.225116  | -0.029940 |
| Mg13 | -0.261560 | 2.739972  | -2.693289 |
| Mg14 | 3.073970  | -0.926165 | -1.735076 |
| Mg15 | 5.588128  | -1.623097 | 0.038373  |
| Mg16 | -4.735141 | -1.219177 | 1.607323  |
| Mg17 | 0.429172  | -2.572347 | 1.566246  |
| Mg18 | -0.265838 | 2.843999  | 2.587880  |
| Mg19 | 2.944897  | -3.318731 | 0.067721  |
| Mg20 | -2.083167 | -1.975580 | 3.089174  |
| Mg21 | 2.522987  | 1.974548  | -1.669425 |
| Mg22 | -4.728725 | -1.285790 | -1.567706 |
| Mg23 | 0.433660  | -2.631486 | -1.467924 |
| Mg24 | -2.074524 | -2.094789 | -3.014732 |

@mg24-isomer33 bp86/6-31G(d) Etot=-4802.266801 Eb=-15.53

|     |          |           |           |
|-----|----------|-----------|-----------|
| Mg1 | 1.007442 | -0.039742 | -0.121503 |
| Mg2 | 3.558148 | -0.079086 | 1.814552  |



|      |           |           |           |
|------|-----------|-----------|-----------|
| Mg3  | 4.153637  | 2.208290  | -0.174018 |
| Mg4  | 0.732805  | 0.659621  | 2.819646  |
| Mg5  | 1.321809  | 3.186287  | 0.416956  |
| Mg6  | 3.864734  | -0.540520 | -1.411765 |
| Mg7  | -1.406010 | 1.860050  | 0.658200  |
| Mg8  | -1.418048 | -1.370330 | 1.653699  |
| Mg9  | -0.385579 | -3.367439 | -0.422375 |
| Mg10 | 2.446700  | -3.455203 | -1.113712 |
| Mg11 | 2.039321  | 1.683229  | -2.410920 |
| Mg12 | 3.090549  | 2.706173  | 2.760712  |
| Mg13 | -1.811616 | -0.761576 | -1.411663 |
| Mg14 | -2.538210 | 0.840340  | 3.281671  |
| Mg15 | -3.496630 | -3.074729 | -0.089020 |
| Mg16 | -4.955176 | -0.577908 | -1.022185 |
| Mg17 | 1.584675  | -2.409716 | 1.728622  |
| Mg18 | -0.510811 | 3.266450  | -1.944775 |
| Mg19 | -3.295753 | 1.820841  | -1.885049 |
| Mg20 | -4.448938 | 1.705540  | 0.912809  |
| Mg21 | 0.947672  | -1.428711 | -2.835957 |
| Mg22 | -4.526622 | -1.125150 | 1.963964  |
| Mg23 | -0.653154 | 0.921218  | -3.815201 |
| Mg24 | 4.699055  | -2.627928 | 0.647310  |

@mg24-isomer34 bp86/6-31G(d) Etot=-4802.266094 Eb=-15.51

|      |           |           |           |
|------|-----------|-----------|-----------|
| Mg1  | -1.072604 | 0.076453  | -0.070104 |
| Mg2  | 1.306766  | -0.944306 | -1.742888 |
| Mg3  | 0.616589  | 3.012154  | 1.654421  |
| Mg4  | -3.400890 | -0.036773 | -2.672767 |
| Mg5  | 0.732340  | 2.122125  | -1.518140 |
| Mg6  | 3.429546  | -2.152893 | 0.114705  |
| Mg7  | 2.025443  | 0.472361  | 0.876220  |
| Mg8  | 6.366785  | -1.416466 | 0.090179  |
| Mg9  | 4.380607  | 0.567862  | -1.360970 |
| Mg10 | -2.293888 | 1.822551  | 2.528748  |
| Mg11 | -3.904192 | -1.774436 | -0.089768 |
| Mg12 | -1.711836 | 3.242477  | -0.120990 |
| Mg13 | -1.778627 | -3.677854 | 0.608343  |
| Mg14 | -1.441081 | -2.284499 | -2.090383 |
| Mg15 | -4.800403 | -0.189266 | 2.511069  |
| Mg16 | -0.591040 | 0.190571  | -3.733970 |
| Mg17 | 5.083715  | 0.832257  | 1.530288  |
| Mg18 | -2.141686 | -1.404888 | 2.589870  |
| Mg19 | 3.433599  | 3.147429  | 0.054916  |
| Mg20 | 0.605670  | -2.105374 | 1.520717  |
| Mg21 | -3.942038 | 1.298989  | -0.078110 |
| Mg22 | 0.209551  | 0.422626  | 3.287330  |
| Mg23 | 0.915739  | -3.840275 | -0.897493 |
| Mg24 | -2.028062 | 2.619173  | -2.991223 |

@mg24-isomer35 bp86/6-31G(d) Etot=-4802.265600 Eb=-15.50

|      |           |           |           |
|------|-----------|-----------|-----------|
| Mg1  | 4.459254  | -2.228933 | -0.245056 |
| Mg2  | 5.326997  | 0.319893  | 1.229494  |
| Mg3  | 1.864058  | -3.865397 | -0.243764 |
| Mg4  | 1.785686  | -0.813939 | -1.078342 |
| Mg5  | -0.089941 | -2.960523 | -2.363488 |
| Mg6  | 4.572467  | 0.513183  | -1.634840 |
| Mg7  | 2.396318  | -0.227566 | 2.040262  |
| Mg8  | -0.501456 | 0.009731  | -3.049135 |
| Mg9  | 1.766786  | 1.943900  | -2.374263 |
| Mg10 | 0.135537  | -2.024144 | 1.393701  |
| Mg11 | -2.289979 | -1.298844 | -1.051326 |
| Mg12 | -1.597508 | -3.991515 | 0.081033  |
| Mg13 | -1.071042 | 2.929386  | -2.746165 |
| Mg14 | 3.001297  | 2.289446  | 0.417046  |

|      |           |           |           |
|------|-----------|-----------|-----------|
| Mg15 | -4.619848 | -2.644146 | 0.333243  |
| Mg16 | -0.477700 | 0.708823  | 0.213539  |
| Mg17 | 0.203124  | 3.572635  | -0.007466 |
| Mg18 | -3.501178 | 1.060924  | -2.412111 |
| Mg19 | -0.231502 | -0.084849 | 3.770446  |
| Mg20 | 0.851255  | 2.398969  | 2.701837  |
| Mg21 | -2.787730 | 3.008413  | -0.187522 |
| Mg22 | -4.396981 | 0.607059  | 0.511647  |
| Mg23 | -2.583810 | -1.120244 | 2.138497  |
| Mg24 | -2.214103 | 1.897738  | 2.562734  |

@mg24-isomer36 bp86/6-31G(d) Etot=-4802.263943 Eb=-15.46

|      |           |           |           |
|------|-----------|-----------|-----------|
| Mg1  | -1.248339 | -0.324978 | 0.099013  |
| Mg2  | -3.884169 | -1.753701 | 1.280456  |
| Mg3  | -5.533222 | 0.262283  | -0.164564 |
| Mg4  | -1.829621 | -0.233675 | 3.072559  |
| Mg5  | 1.088667  | -0.898760 | 2.108205  |
| Mg6  | 0.679378  | -3.093998 | -0.190109 |
| Mg7  | 3.714042  | -2.027473 | 0.251694  |
| Mg8  | 1.617596  | 0.199974  | -0.950386 |
| Mg9  | -3.432915 | 1.673517  | 1.435001  |
| Mg10 | -3.419128 | -0.781487 | -2.049113 |
| Mg11 | -0.361543 | 2.193113  | 1.997176  |
| Mg12 | -1.000917 | 1.574265  | -2.237677 |
| Mg13 | 3.784900  | 2.597918  | -1.388848 |
| Mg14 | 2.668637  | 1.982975  | 1.674384  |
| Mg15 | 5.172443  | 0.837646  | 0.536704  |
| Mg16 | 2.469801  | -2.512795 | -2.520039 |
| Mg17 | 0.960738  | 3.311417  | -0.521665 |
| Mg18 | -2.299970 | -3.364319 | -0.772258 |
| Mg19 | -1.233787 | -3.066713 | 2.082932  |
| Mg20 | 4.013379  | -0.530016 | 2.879541  |
| Mg21 | -0.483250 | -1.758667 | -2.592057 |
| Mg22 | -1.900921 | 3.725364  | -0.154119 |
| Mg23 | -3.979977 | 2.243216  | -1.696578 |
| Mg24 | 4.438175  | -0.255107 | -2.180252 |

@mg24-isomer37 bp86/6-31G(d) Etot=-4802.262957 Eb=-15.43

|      |           |           |           |
|------|-----------|-----------|-----------|
| Mg1  | -1.585365 | 1.835461  | 2.550949  |
| Mg2  | -0.973330 | 0.415881  | 0.005970  |
| Mg3  | -1.915689 | -1.738836 | 2.030286  |
| Mg4  | 1.368153  | 2.102517  | 1.509049  |
| Mg5  | 0.784557  | -2.536077 | -2.669555 |
| Mg6  | -4.498218 | -2.319262 | 0.325298  |
| Mg7  | -2.159915 | 2.676606  | -2.271988 |
| Mg8  | -0.799311 | 3.801746  | 0.296718  |
| Mg9  | 0.999717  | -0.775691 | 2.330625  |
| Mg10 | -4.214658 | 0.336204  | 1.731433  |
| Mg11 | -0.786785 | 0.002836  | -2.979831 |
| Mg12 | -2.353623 | -4.436035 | 0.701551  |
| Mg13 | -3.684213 | 2.861244  | 0.240311  |
| Mg14 | -1.970358 | -2.311670 | -1.505734 |
| Mg15 | 2.192393  | 4.638865  | -0.165273 |
| Mg16 | 1.987191  | -0.357339 | -0.723101 |
| Mg17 | 3.871467  | 2.105979  | -0.378308 |
| Mg18 | 3.810774  | 0.370217  | 2.142141  |
| Mg19 | 5.224590  | -0.784354 | -0.228574 |
| Mg20 | 0.947834  | 2.290903  | -1.820562 |
| Mg21 | 3.479159  | -2.555780 | 1.460384  |
| Mg22 | 3.606202  | -2.916032 | -1.566567 |
| Mg23 | 0.480360  | -2.978767 | 0.390316  |
| Mg24 | -3.810932 | 0.271385  | -1.405540 |

@mg24-isomer38 bp86/6-31G(d) Etot=-4802.261883 Eb=-15.40

|      |           |           |           |
|------|-----------|-----------|-----------|
| Mg1  | 4.486521  | -0.987436 | -1.451405 |
| Mg2  | 5.237784  | -0.920760 | 1.367343  |
| Mg3  | -1.191105 | 2.701580  | -0.248591 |
| Mg4  | 3.712087  | 1.599569  | 0.007579  |
| Mg5  | 1.263882  | 2.767248  | 1.732913  |
| Mg6  | -0.590514 | -0.517256 | -3.074549 |
| Mg7  | 2.245667  | 0.739282  | -2.770649 |
| Mg8  | -4.073737 | 1.979643  | 0.694254  |
| Mg9  | 1.578345  | 3.297620  | -1.246474 |
| Mg10 | 2.271348  | -1.851445 | 1.435700  |
| Mg11 | -2.253234 | -0.398030 | -0.500896 |
| Mg12 | -3.856263 | -3.288292 | -0.087866 |
| Mg13 | -0.871569 | -2.283682 | 1.421571  |
| Mg14 | -2.872758 | -0.168441 | 2.546503  |
| Mg15 | 0.186443  | 0.094381  | 3.028342  |
| Mg16 | -5.276935 | -0.798827 | 0.644018  |
| Mg17 | -3.295589 | 1.753216  | -2.346817 |
| Mg18 | 3.139426  | 0.693707  | 2.902551  |
| Mg19 | 0.698940  | 0.272925  | -0.134471 |
| Mg20 | 0.914831  | -4.317928 | 0.150272  |
| Mg21 | 1.680987  | -2.173552 | -1.779547 |
| Mg22 | -1.597838 | 2.552204  | 2.675659  |
| Mg23 | -0.340892 | 2.397571  | -3.349730 |
| Mg24 | -1.195826 | -3.143296 | -1.615709 |

@mg24-isomer39 bp86/6-31G(d) Etot=-4802.260229 Eb=-15.36

|      |           |           |           |
|------|-----------|-----------|-----------|
| Mg1  | -0.779088 | -0.183514 | 0.035196  |
| Mg2  | 1.729585  | -0.476934 | 1.813320  |
| Mg3  | -0.007817 | 0.985308  | -2.910076 |
| Mg4  | -1.625985 | 2.324406  | 1.988015  |
| Mg5  | 0.825944  | 2.408898  | -0.042838 |
| Mg6  | 4.422816  | -1.499110 | 0.469465  |
| Mg7  | 2.130036  | -0.522052 | -1.484271 |
| Mg8  | 6.776015  | 0.420053  | 0.535098  |
| Mg9  | 3.692671  | 1.541227  | 0.635524  |
| Mg10 | -2.744412 | -0.265622 | -2.477256 |
| Mg11 | -3.066936 | -0.459566 | 2.062310  |
| Mg12 | -2.084428 | 2.460399  | -1.065184 |
| Mg13 | -0.712342 | -2.579420 | 2.224972  |
| Mg14 | -0.566751 | 0.024917  | 3.913389  |
| Mg15 | -5.256168 | -0.611048 | -0.278764 |
| Mg16 | 1.209780  | 2.260573  | 2.971537  |
| Mg17 | 5.157806  | 0.312783  | -1.948594 |
| Mg18 | -2.850787 | -2.405344 | -0.355212 |
| Mg19 | 2.735106  | 2.231253  | -2.406644 |
| Mg20 | -0.831261 | -4.567654 | -0.291502 |
| Mg21 | -4.446026 | 2.015449  | 0.954492  |
| Mg22 | -0.315403 | -2.229153 | -2.386386 |
| Mg23 | 1.532108  | -2.950111 | 0.082307  |
| Mg24 | -4.924465 | 1.764263  | -2.038897 |

@mg24-isomer40 bp86/6-31G(d) Etot=-4802.259879 Eb=-15.35

|      |           |           |           |
|------|-----------|-----------|-----------|
| Mg1  | -0.667130 | 3.921104  | -0.843188 |
| Mg2  | -3.183413 | 2.141653  | -0.540801 |
| Mg3  | 1.229834  | 3.531951  | 1.438972  |
| Mg4  | -2.713522 | -0.702931 | -1.674347 |
| Mg5  | 1.825496  | 2.263646  | -1.377354 |
| Mg6  | 1.753134  | 0.666136  | -3.980851 |
| Mg7  | -2.710948 | 0.385670  | 2.099265  |
| Mg8  | 2.241990  | -1.083089 | 3.484720  |
| Mg9  | -3.183220 | -2.410326 | 0.992628  |
| Mg10 | -0.893135 | 1.547177  | -2.759424 |
| Mg11 | -5.066276 | -0.118832 | 0.143506  |
| Mg12 | 1.837062  | -0.914374 | -1.404121 |

|      |           |           |           |
|------|-----------|-----------|-----------|
| Mg13 | -0.562333 | -2.679763 | -0.677776 |
| Mg14 | 2.118091  | -2.729490 | 0.956188  |
| Mg15 | -0.408669 | 0.626492  | 0.085338  |
| Mg16 | -1.762360 | 3.275379  | 1.894249  |
| Mg17 | 2.532302  | 0.790072  | 1.168903  |
| Mg18 | 0.127135  | 1.171508  | 3.088237  |
| Mg19 | -6.139836 | -3.132827 | -0.360679 |
| Mg20 | 4.693660  | 0.422264  | -1.200130 |
| Mg21 | 4.958504  | -1.153109 | 1.642090  |
| Mg22 | 4.789432  | -2.615575 | -0.937840 |
| Mg23 | -0.347170 | -1.454949 | -3.472624 |
| Mg24 | -0.468627 | -1.747788 | 2.235037  |

@mg24-isomer41 bp86/6-31G(d) Etot=-4802.258771 Eb=-15.32

|      |           |           |           |
|------|-----------|-----------|-----------|
| Mg1  | 1.558908  | -0.542194 | -3.653594 |
| Mg2  | 1.107586  | 0.612402  | 2.953361  |
| Mg3  | -3.119860 | 3.019431  | -2.266303 |
| Mg4  | -2.206077 | -0.005215 | -0.497423 |
| Mg5  | -0.450628 | -2.915407 | 0.330952  |
| Mg6  | -2.770000 | -4.065096 | -1.547838 |
| Mg7  | -4.069129 | 0.122600  | 1.854350  |
| Mg8  | 3.171023  | 1.736130  | 0.806580  |
| Mg9  | 3.031312  | -3.375615 | 0.670434  |
| Mg10 | 3.626332  | -0.787144 | -1.050436 |
| Mg11 | 2.298203  | 1.934853  | -2.148806 |
| Mg12 | -4.380143 | 2.778938  | 0.393382  |
| Mg13 | -1.594968 | 1.916288  | 2.102557  |
| Mg14 | 2.550525  | 4.370357  | -0.391046 |
| Mg15 | -3.659128 | -2.838182 | 1.029801  |
| Mg16 | 3.644919  | -0.938456 | 2.146522  |
| Mg17 | 1.641802  | -2.934211 | -1.888962 |
| Mg18 | 0.801485  | -0.186238 | -0.191567 |
| Mg19 | -1.436359 | -1.097796 | 2.562346  |
| Mg20 | 1.058771  | 3.557907  | 2.112023  |
| Mg21 | 1.200774  | -2.480142 | 2.884807  |
| Mg22 | -0.700818 | 1.177997  | -2.983561 |
| Mg23 | -1.044398 | -1.814809 | -2.734152 |
| Mg24 | -0.260131 | 2.753603  | -0.493428 |

@mg24-isomer42 bp86/6-31G(d) Etot=-4802.253673 Eb=-15.19

|      |           |           |           |
|------|-----------|-----------|-----------|
| Mg1  | 0.792989  | 1.697718  | 2.133291  |
| Mg2  | 2.641639  | -3.350974 | 1.334706  |
| Mg3  | -0.844224 | 2.804060  | -2.649634 |
| Mg4  | -3.038458 | 1.142454  | -1.316406 |
| Mg5  | -3.897009 | 0.177385  | 1.593431  |
| Mg6  | 4.389637  | -0.286940 | -1.676270 |
| Mg7  | -0.908261 | -3.041104 | -2.255769 |
| Mg8  | 3.274375  | 2.995127  | 0.875284  |
| Mg9  | 1.679368  | -1.698840 | -1.238753 |
| Mg10 | -3.125196 | -1.228444 | -3.260080 |
| Mg11 | 5.781163  | 1.906546  | -0.269855 |
| Mg12 | -1.684789 | 0.550500  | 3.718715  |
| Mg13 | -0.778740 | -0.229192 | 0.256549  |
| Mg14 | 3.015465  | -0.246233 | 1.160293  |
| Mg15 | -0.381405 | -0.134686 | -2.986451 |
| Mg16 | -2.472052 | -2.124103 | 2.754101  |
| Mg17 | 0.611896  | -1.337945 | 2.903193  |
| Mg18 | -2.566156 | 4.452633  | -0.933612 |
| Mg19 | 0.283781  | 4.091509  | 0.190311  |
| Mg20 | -0.472437 | -3.253887 | 0.737022  |
| Mg21 | -3.222193 | -2.044874 | -0.344955 |
| Mg22 | 1.483402  | -4.808992 | -0.994948 |
| Mg23 | -1.999967 | 2.532630  | 1.342753  |
| Mg24 | 1.437174  | 1.435649  | -1.072915 |

@mg24-isomer43 bp86/6-31G(d) Etot=-4802.251951 Eb=-15.14

|      |           |           |           |
|------|-----------|-----------|-----------|
| Mg1  | -3.795918 | -1.393353 | -1.899469 |
| Mg2  | -0.017326 | 0.350056  | 2.522554  |
| Mg3  | 1.259861  | -0.013476 | -0.348305 |
| Mg4  | 1.247014  | -3.046629 | -1.084661 |
| Mg5  | 4.062816  | -3.621244 | -0.069493 |
| Mg6  | -1.774959 | 0.412865  | 0.135629  |
| Mg7  | 0.295053  | 2.892428  | 0.803438  |
| Mg8  | -4.980848 | 0.057823  | 0.490382  |
| Mg9  | -0.516065 | 2.123701  | -2.166455 |
| Mg10 | -3.700203 | 1.624859  | -1.910933 |
| Mg11 | 3.838070  | -1.011616 | -1.695368 |
| Mg12 | 2.876767  | 1.217175  | 1.966614  |
| Mg13 | -3.446364 | 2.381617  | 1.846391  |
| Mg14 | 2.505469  | 1.977909  | -2.171756 |
| Mg15 | -3.117409 | -0.595515 | 2.657483  |
| Mg16 | -0.841034 | -2.352428 | 1.254562  |
| Mg17 | 4.825895  | 1.559188  | -0.360955 |
| Mg18 | 4.918437  | -0.991209 | 1.236737  |
| Mg19 | -0.789537 | -1.028367 | -2.361451 |
| Mg20 | 3.083701  | 4.030077  | 0.208243  |
| Mg21 | 2.168009  | -2.006908 | 1.854175  |
| Mg22 | -2.324614 | 3.925730  | -0.421826 |
| Mg23 | -3.907253 | -2.831343 | 0.783976  |
| Mg24 | -1.869561 | -3.661337 | -1.269515 |

@mg24-isomer44 bp86/6-31G(d) Etot=-4802.249024 Eb=-15.07

|      |           |           |           |
|------|-----------|-----------|-----------|
| Mg1  | 1.014017  | -1.010027 | -2.702728 |
| Mg2  | -2.164849 | -0.372150 | -1.738998 |
| Mg3  | 0.948105  | 0.005881  | 0.121162  |
| Mg4  | -0.757519 | 0.682126  | 3.244374  |
| Mg5  | -3.906900 | -2.987419 | -0.577553 |
| Mg6  | 1.098594  | 2.733995  | 1.734372  |
| Mg7  | 2.057633  | -3.059481 | -0.468946 |
| Mg8  | 3.938711  | -0.756861 | -1.645423 |
| Mg9  | 2.522370  | 1.756784  | -2.286637 |
| Mg10 | 5.059685  | -3.328597 | -0.747470 |
| Mg11 | -1.566455 | 1.993169  | 0.271208  |
| Mg12 | -3.768216 | 1.340617  | 2.318843  |
| Mg13 | 2.156648  | 0.198360  | 3.189456  |
| Mg14 | -5.173832 | -0.769096 | -2.137288 |
| Mg15 | -0.407206 | 1.716706  | -3.060658 |
| Mg16 | 0.526875  | 3.731653  | -1.093178 |
| Mg17 | 3.713750  | -1.776847 | 1.630724  |
| Mg18 | -0.810881 | -2.840249 | -0.550233 |
| Mg19 | -4.453659 | 1.830339  | -0.663607 |
| Mg20 | -5.430097 | -0.749123 | 0.903540  |
| Mg21 | 3.783565  | 1.124446  | 0.723069  |
| Mg22 | 0.594542  | -2.227659 | 2.247308  |
| Mg23 | -2.288536 | -1.166285 | 1.461079  |
| Mg24 | 3.313655  | 3.929719  | -0.172415 |

@mg24-isomer45 bp86/6-31G(d) Etot=-4802.248624 Eb=-15.06

|      |           |           |           |
|------|-----------|-----------|-----------|
| Mg1  | -1.603984 | -3.098654 | 1.626207  |
| Mg2  | -1.155405 | 1.562414  | 3.682410  |
| Mg3  | -2.771338 | 3.177232  | -1.104192 |
| Mg4  | 1.192365  | -2.009388 | 1.259123  |
| Mg5  | -4.172222 | -1.443639 | 0.640905  |
| Mg6  | 4.614459  | 1.460767  | 1.876864  |
| Mg7  | 1.541472  | -1.982634 | -2.350120 |
| Mg8  | -3.631838 | 1.938584  | 1.541014  |
| Mg9  | 0.152939  | 2.875048  | -2.231639 |
| Mg10 | 0.512926  | -4.345233 | -0.578842 |

|      |           |           |           |
|------|-----------|-----------|-----------|
| Mg11 | 1.542820  | 0.907984  | 2.282194  |
| Mg12 | 2.444310  | 2.791633  | -0.105516 |
| Mg13 | 5.231349  | 1.772210  | -1.120774 |
| Mg14 | -0.219463 | -1.236168 | 3.833801  |
| Mg15 | 3.507359  | -3.718582 | -0.344878 |
| Mg16 | -4.844027 | 1.040801  | -1.011360 |
| Mg17 | -0.464560 | 2.840383  | 0.883791  |
| Mg18 | -1.388863 | -2.170278 | -1.325111 |
| Mg19 | -1.860724 | 0.584871  | -2.469286 |
| Mg20 | 2.629962  | 1.043822  | -2.783864 |
| Mg21 | -4.147105 | -1.510497 | -2.403952 |
| Mg22 | 3.722359  | -0.678303 | -0.175047 |
| Mg23 | -1.563704 | -0.104622 | 1.034097  |
| Mg24 | 0.730912  | 0.302247  | -0.655824 |

@mg24-isomer46 bp86/6-31G(d) Etot=-4802.247209 Eb=-15.02

|      |           |           |           |
|------|-----------|-----------|-----------|
| Mg1  | -0.620467 | 0.899515  | 0.144285  |
| Mg2  | -3.810964 | 1.265887  | -0.774059 |
| Mg3  | 1.944895  | -0.680773 | -0.684284 |
| Mg4  | 3.116860  | -3.709699 | -0.555619 |
| Mg5  | 4.286416  | 1.174055  | -1.748590 |
| Mg6  | 0.360372  | 4.108468  | -0.851714 |
| Mg7  | 0.334684  | -3.267351 | -1.643978 |
| Mg8  | -0.073965 | 3.165123  | 2.097858  |
| Mg9  | -3.020692 | 1.698971  | 2.320964  |
| Mg10 | 5.238315  | -1.501221 | -0.687694 |
| Mg11 | 4.756276  | 0.766079  | 1.268228  |
| Mg12 | 0.714914  | -2.687157 | 1.394558  |
| Mg13 | -4.279339 | -0.878927 | 1.329013  |
| Mg14 | -1.564422 | 2.426250  | -2.480027 |
| Mg15 | 2.433945  | 2.483199  | 0.435252  |
| Mg16 | 1.319489  | 1.729824  | -2.463487 |
| Mg17 | 1.466849  | 0.268814  | 2.369823  |
| Mg18 | -1.976502 | -2.411142 | 0.021417  |
| Mg19 | -4.113007 | -1.426226 | -1.941500 |
| Mg20 | -2.448447 | 3.809555  | 0.291362  |
| Mg21 | -1.508433 | -0.976443 | 2.671031  |
| Mg22 | -5.085337 | -3.717085 | -0.038000 |
| Mg23 | -1.071349 | -0.670829 | -2.383085 |
| Mg24 | 3.599908  | -1.868885 | 1.908246  |

@mg24-isomer47 bp86/6-31G(d) Etot=-4802.246620 Eb=-15.01

|      |           |           |           |
|------|-----------|-----------|-----------|
| Mg1  | -0.890626 | 0.093593  | -0.091374 |
| Mg2  | -0.133654 | -3.177081 | -1.511359 |
| Mg3  | -1.483839 | -5.276436 | 0.327914  |
| Mg4  | -3.797007 | 0.332184  | -1.040956 |
| Mg5  | -1.822386 | -1.180545 | -2.938943 |
| Mg6  | -1.868731 | 2.378465  | 1.760215  |
| Mg7  | -3.124763 | -0.491294 | 1.953309  |
| Mg8  | -0.793545 | -2.592945 | 1.677278  |
| Mg9  | 0.326389  | 0.116932  | 2.812324  |
| Mg10 | 1.198548  | -0.739730 | -2.657842 |
| Mg11 | 1.635881  | -1.479685 | 0.381403  |
| Mg12 | -2.992311 | -2.554788 | -0.376927 |
| Mg13 | 1.754439  | 1.559271  | -0.878177 |
| Mg14 | 1.456709  | -4.718775 | 0.720679  |
| Mg15 | -0.303015 | 3.885839  | -0.528988 |
| Mg16 | -3.262387 | 3.352970  | -0.768436 |
| Mg17 | 1.184635  | 2.828531  | 1.880402  |
| Mg18 | 2.702711  | 4.485972  | -0.337289 |
| Mg19 | 4.060534  | -3.243316 | 0.189246  |
| Mg20 | 4.942728  | 2.501589  | -0.252961 |
| Mg21 | 4.201825  | -0.345801 | -0.936263 |
| Mg22 | -1.321099 | 1.839047  | -2.600773 |

|      |           |          |          |
|------|-----------|----------|----------|
| Mg23 | 3.213316  | 0.584330 | 1.894100 |
| Mg24 | -4.884351 | 1.841671 | 1.323420 |

@mg24-isomer48 bp86/6-31G(d) Etot=-4802.243557 Eb=-14.92

|      |           |           |           |
|------|-----------|-----------|-----------|
| Mg1  | -2.693141 | -1.613549 | 2.146255  |
| Mg2  | 1.847080  | -0.024001 | 1.909377  |
| Mg3  | 3.076631  | -2.879997 | 1.801086  |
| Mg4  | -1.968097 | -3.386548 | -0.371162 |
| Mg5  | 4.570538  | -0.511738 | 0.451990  |
| Mg6  | -2.551003 | 1.830883  | 1.791662  |
| Mg7  | 0.114843  | -2.614696 | 1.716078  |
| Mg8  | -5.155270 | 0.131280  | 2.102702  |
| Mg9  | -4.653549 | -1.929046 | -0.176993 |
| Mg10 | 3.803950  | 2.366038  | 1.625208  |
| Mg11 | 4.243209  | -3.634063 | -0.730089 |
| Mg12 | -0.819565 | -0.170266 | 0.204903  |
| Mg13 | 1.136995  | -4.417095 | -0.469215 |
| Mg14 | 0.468887  | 2.550384  | 1.158765  |
| Mg15 | 2.587610  | 4.734863  | 0.189590  |
| Mg16 | 1.889113  | -1.443372 | -0.867343 |
| Mg17 | -4.402338 | 1.090787  | -0.598269 |
| Mg18 | 2.626180  | 1.538604  | -0.900546 |
| Mg19 | -0.421853 | 5.224650  | -0.021660 |
| Mg20 | -0.141761 | -2.639614 | -2.696694 |
| Mg21 | -2.625130 | -0.786686 | -2.231510 |
| Mg22 | -1.868067 | 2.517478  | -1.153515 |
| Mg23 | 0.191079  | 0.559518  | -2.685222 |
| Mg24 | 0.743659  | 3.506185  | -2.195397 |

@mg24-isomer49 bp86/6-31G(d) Etot=-4802.229896 Eb=-14.57

|      |           |           |           |
|------|-----------|-----------|-----------|
| Mg1  | -2.823310 | 0.291591  | 0.359777  |
| Mg2  | 0.148131  | -0.008058 | 0.699101  |
| Mg3  | 1.278871  | 2.272009  | -1.037011 |
| Mg4  | -1.719490 | -2.084212 | 2.230154  |
| Mg5  | 2.991088  | -0.075314 | 1.614332  |
| Mg6  | 1.528249  | -0.774425 | -2.037376 |
| Mg7  | -5.830652 | 0.010902  | -0.141625 |
| Mg8  | -3.911780 | -0.968109 | -2.268026 |
| Mg9  | -3.847600 | 2.178750  | -1.704702 |
| Mg10 | 1.150400  | -3.795240 | -1.622507 |
| Mg11 | -1.198057 | 3.669701  | -2.440101 |
| Mg12 | 1.039839  | 2.532510  | 2.202617  |
| Mg13 | 6.065189  | 0.709378  | 1.091570  |
| Mg14 | 1.145748  | -2.729608 | 1.350129  |
| Mg15 | -4.426467 | -0.732144 | 2.668749  |
| Mg16 | 6.555069  | -1.519725 | -0.766727 |
| Mg17 | -1.672002 | 1.245138  | 2.958870  |
| Mg18 | -1.397642 | 3.035755  | 0.450712  |
| Mg19 | -1.132483 | 0.627727  | -2.206096 |
| Mg20 | -1.392495 | -2.329631 | -0.886340 |
| Mg21 | 3.670589  | -2.365900 | -0.448407 |
| Mg22 | 4.175440  | 0.609968  | -1.302690 |
| Mg23 | 3.831606  | 2.834878  | 0.940457  |
| Mg24 | -4.228240 | -2.635942 | 0.295142  |

@mg24-isomer50 bp86/6-31G(d) Etot=-4802.220612 Eb=-14.33

|     |           |           |           |
|-----|-----------|-----------|-----------|
| Mg1 | 1.752659  | -0.051187 | -0.794856 |
| Mg2 | -1.362141 | 0.998223  | -1.160913 |
| Mg3 | -3.203639 | -1.007085 | -2.515543 |
| Mg4 | -0.547520 | -3.859135 | 0.997733  |
| Mg5 | 3.078645  | 1.126743  | 1.830090  |
| Mg6 | 4.248288  | -1.470842 | 0.821411  |
| Mg7 | -4.651542 | -0.935897 | 1.953138  |
| Mg8 | -6.248405 | 1.452586  | 0.735658  |

|      |           |           |           |
|------|-----------|-----------|-----------|
| Mg9  | 3.903029  | 1.586648  | -2.428143 |
| Mg10 | -5.014866 | 4.102924  | 0.053575  |
| Mg11 | -4.308503 | 1.701962  | -1.684365 |
| Mg12 | 2.102752  | 2.989985  | -0.426495 |
| Mg13 | 6.088322  | 0.701113  | 2.065833  |
| Mg14 | -5.689344 | -1.106999 | -0.807275 |
| Mg15 | 6.181108  | 0.221148  | -0.872613 |
| Mg16 | -3.359650 | -2.959252 | -0.061684 |
| Mg17 | 5.066045  | 2.838906  | 0.175005  |
| Mg18 | 0.048919  | 1.420695  | 1.501532  |
| Mg19 | -1.719964 | -0.974458 | 1.457072  |
| Mg20 | 4.022892  | -1.471157 | -2.202805 |
| Mg21 | 2.064174  | -3.349512 | -0.410471 |
| Mg22 | -0.581045 | -2.109327 | -1.413739 |
| Mg23 | -3.115319 | 1.730746  | 1.210161  |
| Mg24 | 1.245102  | -1.576828 | 1.977693  |

@mg24-isomer51 bp86/6-31G(d) Etot=-4802.220033 Eb=-14.31

|      |           |           |           |
|------|-----------|-----------|-----------|
| Mg1  | 0.291081  | 0.762516  | -2.126839 |
| Mg2  | -2.719651 | 0.032642  | -2.168984 |
| Mg3  | 1.937633  | -1.675872 | -1.084285 |
| Mg4  | -1.621067 | 2.176482  | -0.004057 |
| Mg5  | -1.421527 | 0.503957  | 2.736790  |
| Mg6  | -0.200290 | -4.005152 | -0.349367 |
| Mg7  | -4.138501 | 1.412234  | 1.863487  |
| Mg8  | 1.065882  | 3.567420  | -0.570399 |
| Mg9  | -1.061329 | -0.978899 | 0.158427  |
| Mg10 | 3.328988  | 1.074629  | -1.411795 |
| Mg11 | 1.239177  | -2.231352 | 1.900844  |
| Mg12 | 4.958301  | -1.598355 | -1.709642 |
| Mg13 | 3.389801  | -0.194072 | 2.855416  |
| Mg14 | 4.124266  | -2.649163 | 1.043658  |
| Mg15 | -0.533631 | -2.253502 | -2.825811 |
| Mg16 | 5.495358  | 0.108387  | 0.653867  |
| Mg17 | -7.021103 | 1.587390  | 0.447841  |
| Mg18 | 3.977460  | 4.226724  | -1.254690 |
| Mg19 | -3.136090 | -3.007847 | -0.876541 |
| Mg20 | -5.030907 | -0.729945 | -0.406034 |
| Mg21 | -4.447362 | 2.328639  | -1.075952 |
| Mg22 | 1.277283  | 0.754701  | 0.912145  |
| Mg23 | 3.713270  | 2.480703  | 1.346165  |
| Mg24 | -3.467041 | -1.692265 | 1.945755  |

@mg24-isomer52 bp86/6-31G(d) Etot=-4802.213658 Eb=-14.14

|      |           |           |           |
|------|-----------|-----------|-----------|
| Mg1  | -4.311766 | -1.580517 | 0.958057  |
| Mg2  | 0.961808  | 0.526417  | 0.630437  |
| Mg3  | 5.508378  | 1.462799  | 1.213938  |
| Mg4  | -6.136204 | 2.692148  | -1.164561 |
| Mg5  | -2.957283 | -0.133872 | 3.287435  |
| Mg6  | -4.394178 | 0.084263  | -1.546384 |
| Mg7  | -0.191542 | -4.269980 | 0.007275  |
| Mg8  | 1.918244  | 1.092318  | -2.328360 |
| Mg9  | -2.690153 | -2.581539 | -1.461683 |
| Mg10 | -1.744059 | 1.704431  | 1.300626  |
| Mg11 | 0.063169  | 3.185732  | -0.985019 |
| Mg12 | 4.948389  | 1.677608  | -1.944285 |
| Mg13 | 0.965084  | -1.815368 | -1.430317 |
| Mg14 | -0.532534 | -3.997761 | -3.070949 |
| Mg15 | 7.021232  | -0.243046 | -0.710153 |
| Mg16 | 3.757873  | -0.710101 | -0.247172 |
| Mg17 | -1.248976 | -1.530104 | 1.026002  |
| Mg18 | 0.230228  | -0.565459 | 3.489997  |
| Mg19 | -3.020971 | 2.893154  | -1.183268 |
| Mg20 | 1.800139  | -2.452057 | 1.586199  |



|      |           |          |           |
|------|-----------|----------|-----------|
| Mg21 | -1.312335 | 0.333172 | -1.506789 |
| Mg22 | 2.918561  | 2.749526 | 0.086940  |
| Mg23 | -4.758820 | 1.409724 | 1.282526  |
| Mg24 | 3.205717  | 0.068511 | 2.709508  |

@mg24-isomer53 bp86/6-31G(d) Etot=-4802.207816 Eb=-13.99

|      |           |           |           |
|------|-----------|-----------|-----------|
| Mg1  | -0.360060 | -0.963826 | 1.121436  |
| Mg2  | 1.574831  | 1.477866  | 0.720079  |
| Mg3  | -1.405962 | 1.993074  | 1.502789  |
| Mg4  | -5.572579 | -0.724238 | -1.240423 |
| Mg5  | -6.359043 | 0.846073  | 1.200615  |
| Mg6  | 3.939627  | -0.566285 | -0.430398 |
| Mg7  | -3.030853 | -2.063556 | -0.092142 |
| Mg8  | -3.448527 | -0.111810 | 2.187571  |
| Mg9  | -2.901713 | -0.343987 | -2.732888 |
| Mg10 | -4.284745 | 2.819927  | 2.092593  |
| Mg11 | 4.318806  | -3.715466 | 1.761757  |
| Mg12 | 2.247869  | -1.493880 | -2.622765 |
| Mg13 | 5.757267  | -1.084715 | 1.997816  |
| Mg14 | 1.873906  | -2.988177 | 0.078018  |
| Mg15 | 5.362161  | 2.101298  | -1.080374 |
| Mg16 | 2.714821  | -0.894309 | 2.349666  |
| Mg17 | -0.581819 | 1.109320  | -1.278418 |
| Mg18 | -0.502824 | -2.199167 | -1.699892 |
| Mg19 | -0.004930 | -0.061351 | -3.974793 |
| Mg20 | 2.385529  | 1.551604  | -2.224346 |
| Mg21 | 3.235743  | 3.959134  | -0.162927 |
| Mg22 | -5.749362 | -2.111732 | 1.402241  |
| Mg23 | -3.666459 | 1.723298  | -0.666739 |
| Mg24 | 4.458314  | 1.740905  | 1.791522  |

@mg24-isomer54 bp86/6-31G(d) Etot=-4802.200064 Eb=-13.79

|      |           |           |           |
|------|-----------|-----------|-----------|
| Mg1  | 1.096107  | -0.383888 | 0.089294  |
| Mg2  | 4.894174  | -1.028573 | 0.900301  |
| Mg3  | -0.934636 | -2.490519 | 0.984274  |
| Mg4  | -3.330810 | -1.725825 | -0.561079 |
| Mg5  | 1.535212  | -3.416982 | -0.642143 |
| Mg6  | -1.398646 | -0.050506 | -2.306535 |
| Mg7  | 0.655169  | 2.620403  | 0.816082  |
| Mg8  | 3.564494  | 0.585162  | -1.361006 |
| Mg9  | 5.188725  | 2.063156  | 0.837414  |
| Mg10 | -1.719059 | 0.524640  | 1.041039  |
| Mg11 | -4.170614 | 1.360506  | -0.811871 |
| Mg12 | 1.393181  | -1.204179 | -2.875420 |
| Mg13 | 4.285757  | -3.940503 | 0.710340  |
| Mg14 | -4.535506 | -0.391627 | 1.795993  |
| Mg15 | 0.958922  | 1.907566  | -2.332368 |
| Mg16 | 2.135797  | -2.362753 | 2.146959  |
| Mg17 | -6.466145 | -0.986816 | -1.111769 |
| Mg18 | -7.107492 | 1.558785  | 0.413981  |
| Mg19 | 4.108667  | -2.303866 | -1.840299 |
| Mg20 | -7.500667 | -1.189146 | 1.643487  |
| Mg21 | 2.799367  | 0.683853  | 2.354905  |
| Mg22 | 3.078108  | 3.592152  | -0.871589 |
| Mg23 | 3.187639  | 3.710794  | 2.213139  |
| Mg24 | -1.717744 | 2.868168  | -1.233131 |

@mg25-isomer01 bp86/6-31G(d) Etot=-5002.399141 Eb=-16.48

|     |           |           |           |
|-----|-----------|-----------|-----------|
| Mg1 | 1.182678  | -1.556087 | 3.210941  |
| Mg2 | 4.384549  | 1.801954  | 0.848796  |
| Mg3 | -4.693539 | 1.377280  | 0.070109  |
| Mg4 | -0.415704 | 0.967189  | 2.937067  |
| Mg5 | -1.762626 | -1.903237 | 2.579612  |
| Mg6 | 0.245392  | 1.548714  | -2.212923 |

|      |           |           |           |
|------|-----------|-----------|-----------|
| Mg7  | 3.142744  | -2.712633 | -0.770680 |
| Mg8  | -3.472284 | 0.599501  | 2.652088  |
| Mg9  | -2.302778 | -2.942305 | -0.808095 |
| Mg10 | -1.995948 | 2.765381  | 0.936423  |
| Mg11 | 0.443359  | -3.193430 | -2.234808 |
| Mg12 | -4.163407 | -0.810143 | -1.961678 |
| Mg13 | 1.575248  | -0.176409 | 0.142402  |
| Mg14 | -4.397214 | -1.674459 | 0.950399  |
| Mg15 | 0.367429  | -2.965069 | 0.715489  |
| Mg16 | 3.079118  | 2.187864  | -1.757055 |
| Mg17 | -2.714161 | 1.893899  | -2.109394 |
| Mg18 | -0.522645 | 4.186593  | -1.323090 |
| Mg19 | 1.089895  | 2.719403  | 0.807052  |
| Mg20 | 4.125136  | -1.191046 | 1.652285  |
| Mg21 | 2.076433  | -0.709948 | -2.962175 |
| Mg22 | 2.589934  | 1.058436  | 3.044356  |
| Mg23 | -1.400927 | -0.097744 | 0.031257  |
| Mg24 | -1.188581 | -0.871389 | -3.019928 |
| Mg25 | 4.727900  | -0.302314 | -1.418451 |

@mg25-isomer02 bp86/6-31G(d) Etot=-5002.398854 Eb=-16.48

|      |           |           |           |
|------|-----------|-----------|-----------|
| Mg1  | 3.566654  | 2.623288  | -0.772856 |
| Mg2  | 0.161259  | -0.224284 | 2.954353  |
| Mg3  | 0.026414  | -1.113872 | -3.253182 |
| Mg4  | -4.196132 | 2.075520  | 1.296066  |
| Mg5  | 1.306809  | -2.696474 | 1.484921  |
| Mg6  | -2.398019 | 3.499486  | -0.569994 |
| Mg7  | -4.181576 | 1.262722  | -1.568397 |
| Mg8  | 2.443264  | -2.403352 | -1.894883 |
| Mg9  | -2.869482 | -1.367499 | -2.221183 |
| Mg10 | 0.461998  | 2.820705  | -0.577850 |
| Mg11 | 4.428250  | -0.066193 | -1.773332 |
| Mg12 | 4.897128  | 0.896588  | 1.154225  |
| Mg13 | -1.228891 | 1.531253  | -2.723242 |
| Mg14 | -3.440410 | -3.707675 | -0.322373 |
| Mg15 | -0.486943 | -2.873872 | -0.950988 |
| Mg16 | 3.124892  | -0.715572 | 2.893537  |
| Mg17 | -1.665030 | -2.502306 | 1.857080  |
| Mg18 | -1.020084 | 2.515170  | 2.094452  |
| Mg19 | 1.546819  | -0.084508 | -0.170427 |
| Mg20 | -1.424450 | 0.169328  | 0.035836  |
| Mg21 | -4.370492 | -1.018373 | 0.585099  |
| Mg22 | -2.794786 | 0.090076  | 2.915071  |
| Mg23 | 4.279467  | -2.065499 | 0.483519  |
| Mg24 | 1.775072  | 1.309705  | -2.988139 |
| Mg25 | 2.058269  | 2.045638  | 2.032688  |

@mg25-isomer03 bp86/6-31G(d) Etot=-5002.398561 Eb=-16.47

|      |           |           |           |
|------|-----------|-----------|-----------|
| Mg1  | -4.393318 | -1.997196 | -0.900571 |
| Mg2  | 1.939464  | -2.244301 | -1.884834 |
| Mg3  | -4.064924 | -0.373089 | 1.744661  |
| Mg4  | -2.887711 | -0.539872 | -3.009670 |
| Mg5  | -1.941605 | 2.252406  | -1.872046 |
| Mg6  | 2.061341  | -1.614611 | 3.061766  |
| Mg7  | 4.392630  | 1.998967  | -0.889942 |
| Mg8  | -4.768603 | 0.948951  | -1.224481 |
| Mg9  | -0.507578 | 2.954165  | 0.759399  |
| Mg10 | -2.463439 | -2.993018 | 1.022239  |
| Mg11 | 2.463629  | 2.988298  | 1.037144  |
| Mg12 | -2.061300 | 1.600143  | 3.065825  |
| Mg13 | 1.488003  | 0.085287  | 0.041521  |
| Mg14 | -3.626694 | 2.652799  | 0.796652  |
| Mg15 | 1.077480  | 2.696455  | -1.797681 |
| Mg16 | 3.624114  | -2.653231 | 0.784406  |

|      |           |           |           |
|------|-----------|-----------|-----------|
| Mg17 | -0.878673 | -1.210398 | 2.855955  |
| Mg18 | 0.506675  | -2.952505 | 0.746259  |
| Mg19 | -1.079773 | -2.688361 | -1.811330 |
| Mg20 | 2.887880  | 0.554486  | -3.007077 |
| Mg21 | 4.066940  | 0.364762  | 1.748763  |
| Mg22 | -0.000491 | 0.007451  | -2.933501 |
| Mg23 | -1.478504 | -0.084528 | 0.044183  |
| Mg24 | 0.875496  | 1.192262  | 2.853995  |
| Mg25 | 4.768960  | -0.945324 | -1.231634 |

@mg25-isomer04 bp86/6-31G(d) Etot=-5002.398513 Eb=-16.47

|      |           |           |           |
|------|-----------|-----------|-----------|
| Mg1  | -4.196347 | -0.830006 | 1.391637  |
| Mg2  | -4.016753 | 2.256368  | 0.314765  |
| Mg3  | -3.577100 | -2.328174 | -1.169348 |
| Mg4  | 1.928360  | 3.092951  | 1.443857  |
| Mg5  | 5.086911  | -0.463088 | -0.584474 |
| Mg6  | 3.731444  | -2.444544 | 1.078711  |
| Mg7  | -2.382795 | -0.639462 | -3.444577 |
| Mg8  | -0.991544 | 3.011256  | 0.770133  |
| Mg9  | -1.532271 | 0.009740  | 0.081625  |
| Mg10 | 2.721054  | -1.986415 | -1.869595 |
| Mg11 | -2.819157 | 1.560056  | 2.885002  |
| Mg12 | -0.424813 | -2.318735 | -1.811129 |
| Mg13 | 1.007339  | 2.931903  | -1.514607 |
| Mg14 | -1.965066 | 2.157795  | -2.117022 |
| Mg15 | 1.222191  | -3.843198 | 0.135598  |
| Mg16 | -4.631793 | 0.380375  | -1.783817 |
| Mg17 | -1.571954 | -2.932989 | 1.010793  |
| Mg18 | 3.540740  | 0.412535  | 2.192272  |
| Mg19 | -1.789760 | -1.156198 | 3.411959  |
| Mg20 | 1.433116  | 0.125404  | -0.018776 |
| Mg21 | 4.348995  | 2.420108  | -0.075609 |
| Mg22 | 3.317685  | 1.019284  | -2.488231 |
| Mg23 | 0.968970  | -1.826014 | 2.345205  |
| Mg24 | 0.386399  | 0.342612  | -2.971137 |
| Mg25 | 0.206150  | 1.048437  | 2.786766  |

@mg25-isomer05 bp86/6-31G(d) Etot=-5002.396708 Eb=-16.42

|      |           |           |           |
|------|-----------|-----------|-----------|
| Mg1  | 4.802621  | -2.417486 | 0.360580  |
| Mg2  | -1.048128 | -2.765163 | 1.786992  |
| Mg3  | -3.937267 | 1.482342  | 1.187163  |
| Mg4  | 1.899339  | -2.680940 | 1.208668  |
| Mg5  | -4.243631 | -1.697855 | 1.627124  |
| Mg6  | -0.040680 | -2.616535 | -1.240087 |
| Mg7  | -1.586671 | -0.108351 | 0.101959  |
| Mg8  | 3.798899  | -0.178348 | 2.021541  |
| Mg9  | 4.855545  | 0.079523  | -1.251195 |
| Mg10 | -2.077663 | 3.557721  | -0.219864 |
| Mg11 | 0.684834  | -0.487434 | 2.945142  |
| Mg12 | 0.880094  | 3.214740  | -0.091894 |
| Mg13 | 0.680799  | -0.671385 | -3.458924 |
| Mg14 | 3.919725  | 2.430991  | 0.277803  |
| Mg15 | -2.243956 | -0.302396 | 3.236345  |
| Mg16 | -0.836417 | 2.111815  | 2.137222  |
| Mg17 | 2.085545  | 2.250429  | 2.624973  |
| Mg18 | -3.706086 | 1.837546  | -1.946182 |
| Mg19 | -4.836959 | -0.736541 | -1.101174 |
| Mg20 | 2.855429  | -2.079134 | -1.956515 |
| Mg21 | -0.581634 | 1.811495  | -2.326556 |
| Mg22 | -2.938172 | -3.020144 | -0.676056 |
| Mg23 | 1.327700  | 0.113189  | -0.078452 |
| Mg24 | 2.488675  | 1.663155  | -2.385348 |
| Mg25 | -2.201943 | -0.791235 | -2.783263 |

@mg25-isomer06 bp86/6-31G(d) Etot=-5002.396669 Eb=-16.42

|      |           |           |           |
|------|-----------|-----------|-----------|
| Mg1  | 4.556160  | -0.772810 | 1.590759  |
| Mg2  | -1.226262 | -0.001009 | -0.002080 |
| Mg3  | 4.519409  | 1.829209  | -0.042765 |
| Mg4  | 0.585498  | -0.361611 | 2.871020  |
| Mg5  | 2.238863  | -2.669625 | 1.833001  |
| Mg6  | -3.869993 | -2.130601 | 1.138399  |
| Mg7  | 2.251011  | 2.731111  | -1.769549 |
| Mg8  | 0.631184  | 2.774956  | 0.789785  |
| Mg9  | -0.816550 | 2.593847  | -1.807821 |
| Mg10 | -2.449632 | -0.028577 | 2.870216  |
| Mg11 | 3.654406  | 0.130670  | -2.466667 |
| Mg12 | -4.803687 | 0.727080  | 1.062249  |
| Mg13 | -1.932499 | -0.052073 | -3.057889 |
| Mg14 | 0.819064  | 1.033512  | -3.760646 |
| Mg15 | 0.714451  | -1.567260 | -2.349894 |
| Mg16 | 2.862134  | 1.620004  | 2.527961  |
| Mg17 | 0.796717  | -3.878350 | -0.497023 |
| Mg18 | -0.404524 | 2.317761  | 3.493546  |
| Mg19 | -2.418996 | 2.664002  | 1.078446  |
| Mg20 | -3.846586 | 1.893553  | -1.536305 |
| Mg21 | 3.619185  | -2.367995 | -0.859149 |
| Mg22 | -1.948178 | -2.789703 | -1.241880 |
| Mg23 | -4.428698 | -1.022203 | -1.564307 |
| Mg24 | -0.843085 | -2.675976 | 1.685519  |
| Mg25 | 1.740610  | 0.002086  | 0.015074  |

@mg25-isomer07 bp86/6-31G(d) Etot=-5002.396168 Eb=-16.41

|      |           |           |           |
|------|-----------|-----------|-----------|
| Mg1  | 1.660967  | -3.038985 | 0.297259  |
| Mg2  | 4.424852  | -1.935588 | -0.263849 |
| Mg3  | 3.130987  | -1.555305 | 2.479532  |
| Mg4  | -1.090741 | -3.587528 | 1.091309  |
| Mg5  | -0.451853 | -2.235479 | -1.693125 |
| Mg6  | 2.412530  | -1.479809 | -2.599988 |
| Mg7  | 0.094092  | -1.258155 | 2.609766  |
| Mg8  | -3.327441 | -3.124542 | -0.806740 |
| Mg9  | 4.792684  | 0.618346  | 1.440757  |
| Mg10 | 4.434911  | 0.684384  | -1.694402 |
| Mg11 | 1.511704  | 0.019653  | -0.094494 |
| Mg12 | -0.038976 | -0.029475 | -3.702829 |
| Mg13 | -2.976525 | -1.503904 | 2.180583  |
| Mg14 | 1.979268  | 1.359139  | 2.703803  |
| Mg15 | -1.474758 | 0.111400  | 0.118709  |
| Mg16 | 1.726385  | 2.040703  | -2.439748 |
| Mg17 | -2.916383 | -0.530963 | -2.496496 |
| Mg18 | -1.058696 | 1.583786  | 2.839352  |
| Mg19 | 3.433347  | 2.805880  | 0.141296  |
| Mg20 | -4.900185 | -0.801017 | -0.088240 |
| Mg21 | -1.205069 | 2.231782  | -2.040839 |
| Mg22 | 0.420274  | 2.891169  | 0.429463  |
| Mg23 | -4.039849 | 1.306625  | 1.919321  |
| Mg24 | -2.382963 | 3.486376  | 0.765902  |
| Mg25 | -4.158562 | 1.941508  | -1.096305 |

@mg25-isomer08 bp86/6-31G(d) Etot=-5002.392007 Eb=-16.30

|     |           |           |           |
|-----|-----------|-----------|-----------|
| Mg1 | -1.127324 | 0.254573  | -0.044860 |
| Mg2 | -0.066874 | 1.374770  | -3.507790 |
| Mg3 | 1.517657  | -0.982769 | 2.927309  |
| Mg4 | -1.677747 | -2.833042 | -0.967068 |
| Mg5 | -1.060025 | 0.920921  | 2.954088  |
| Mg6 | 0.420172  | -1.451720 | -2.583089 |
| Mg7 | 0.968068  | -3.077803 | 0.290181  |
| Mg8 | 1.648028  | 2.087685  | 2.224776  |
| Mg9 | 1.827042  | -0.139032 | 0.016281  |

|      |           |           |           |
|------|-----------|-----------|-----------|
| Mg10 | -2.430030 | -0.313033 | -2.716052 |
| Mg11 | -2.047478 | 2.866188  | -1.461657 |
| Mg12 | -3.720768 | -0.334467 | 1.680898  |
| Mg13 | 0.865137  | 2.569431  | -0.929006 |
| Mg14 | -1.157028 | -2.077986 | 2.166200  |
| Mg15 | 3.863525  | 2.395900  | -0.141786 |
| Mg16 | 4.225536  | 0.500987  | 2.166216  |
| Mg17 | -4.531438 | 1.295860  | -1.002349 |
| Mg18 | 3.292271  | -2.310804 | -1.818103 |
| Mg19 | -3.575573 | 2.658087  | 1.462634  |
| Mg20 | 2.824803  | 0.701725  | -2.718932 |
| Mg21 | -4.551921 | -1.700762 | -1.041096 |
| Mg22 | 3.882355  | -2.294019 | 1.159236  |
| Mg23 | 5.106163  | -0.249974 | -0.758511 |
| Mg24 | -0.785672 | 3.529788  | 1.383124  |
| Mg25 | -3.708879 | -3.390505 | 1.259357  |

@mg25-isomer09 bp86/6-31G(d) Etot=-5002.391823 Eb=-16.30

|      |           |           |           |
|------|-----------|-----------|-----------|
| Mg1  | 2.422203  | -2.352567 | 1.946585  |
| Mg2  | -0.481607 | -2.948751 | 2.766750  |
| Mg3  | 0.316814  | -0.147494 | 2.971732  |
| Mg4  | -2.904412 | -0.655392 | 2.606494  |
| Mg5  | 3.572758  | 0.372219  | 2.749109  |
| Mg6  | 4.806052  | -1.124778 | 0.478649  |
| Mg7  | 0.153842  | -2.813768 | -0.267005 |
| Mg8  | 2.936565  | -2.182663 | -1.681662 |
| Mg9  | -2.670777 | -3.054014 | 0.769222  |
| Mg10 | -2.684905 | -1.893760 | -2.072379 |
| Mg11 | 4.619189  | 0.343813  | -2.191208 |
| Mg12 | 1.639645  | -0.046314 | 0.004093  |
| Mg13 | -1.330283 | -0.018132 | 0.000312  |
| Mg14 | -1.534614 | 2.132420  | 2.195476  |
| Mg15 | 1.840805  | 0.427482  | -3.307274 |
| Mg16 | -4.284248 | 1.553384  | 0.880203  |
| Mg17 | 0.165700  | -2.008972 | -3.177364 |
| Mg18 | -4.839370 | -1.275962 | 0.087405  |
| Mg19 | 1.498575  | 2.463984  | 1.892778  |
| Mg20 | 3.998611  | 2.069728  | 0.164499  |
| Mg21 | -1.159240 | 0.700625  | -3.090135 |
| Mg22 | -0.369507 | 4.447920  | 0.670730  |
| Mg23 | -4.167545 | 0.733269  | -2.089147 |
| Mg24 | -2.291065 | 2.810313  | -1.012227 |
| Mg25 | 0.746814  | 2.467409  | -1.295636 |

@mg25-isomer10 bp86/6-31G(d) Etot=-5002.390372 Eb=-16.26

|      |           |           |           |
|------|-----------|-----------|-----------|
| Mg1  | -0.675318 | 2.625527  | -0.652886 |
| Mg2  | -1.842316 | -0.083413 | -0.092695 |
| Mg3  | 1.160151  | 0.082203  | 0.115343  |
| Mg4  | -3.326095 | -2.681061 | 0.843444  |
| Mg5  | 3.854978  | 0.709991  | -1.601725 |
| Mg6  | -3.347188 | -0.297501 | 2.817113  |
| Mg7  | -3.790120 | -1.409342 | -1.991082 |
| Mg8  | 1.428329  | 0.347067  | 3.362844  |
| Mg9  | -0.745405 | -1.567795 | -2.899613 |
| Mg10 | 2.121364  | 3.300809  | -1.508965 |
| Mg11 | 3.958107  | 0.388564  | 1.608438  |
| Mg12 | 1.653825  | 2.855995  | 1.629027  |
| Mg13 | -1.952137 | 1.167684  | -3.166757 |
| Mg14 | 4.431104  | 3.061586  | 0.316175  |
| Mg15 | -1.017679 | 1.683698  | 2.414261  |
| Mg16 | 4.409781  | -1.962665 | -0.209008 |
| Mg17 | -3.800816 | 2.321609  | 1.323630  |
| Mg18 | -0.678263 | -1.613168 | 2.532006  |
| Mg19 | 0.959363  | 0.928660  | -2.924731 |

|      |           |           |           |
|------|-----------|-----------|-----------|
| Mg20 | 2.204570  | -2.318835 | 1.951103  |
| Mg21 | 2.553364  | -4.252075 | -0.383542 |
| Mg22 | -5.209231 | -0.339663 | 0.474535  |
| Mg23 | -4.356469 | 1.748575  | -1.506865 |
| Mg24 | -0.121299 | -2.816515 | -0.196004 |
| Mg25 | 2.127401  | -1.879934 | -2.254049 |

@mg25-isomer11 bp86/6-31G(d) Etot=-5002.383646 Eb=-16.09

|      |           |           |           |
|------|-----------|-----------|-----------|
| Mg1  | -0.119043 | -1.878703 | -2.069197 |
| Mg2  | -1.792929 | -0.035583 | -0.036291 |
| Mg3  | 1.212896  | 0.156512  | 0.195727  |
| Mg4  | -4.269008 | 1.016539  | 1.479950  |
| Mg5  | 4.076122  | 0.256346  | -1.295869 |
| Mg6  | -3.569413 | -1.978180 | 2.162438  |
| Mg7  | -3.157701 | 2.952562  | -0.622160 |
| Mg8  | 1.285393  | -2.066497 | 2.883775  |
| Mg9  | -0.139351 | 2.793765  | -1.221341 |
| Mg10 | 2.741254  | -2.012907 | -2.808532 |
| Mg11 | 3.833574  | -0.992142 | 1.639925  |
| Mg12 | 1.927404  | -2.994591 | 0.026334  |
| Mg13 | -1.771858 | 0.812512  | -2.980869 |
| Mg14 | 4.823423  | -2.635164 | -0.679074 |
| Mg15 | -0.873184 | -2.769865 | 0.907256  |
| Mg16 | 3.942408  | 1.993207  | 1.252330  |
| Mg17 | -3.171262 | -2.013585 | -1.976629 |
| Mg18 | -1.123342 | -0.440890 | 3.113831  |
| Mg19 | 1.317881  | 0.740049  | -2.903338 |
| Mg20 | 1.515393  | 1.099831  | 3.074469  |
| Mg21 | 1.531224  | 3.701277  | 1.266424  |
| Mg22 | -5.415439 | -1.634393 | -0.022179 |
| Mg23 | -4.626347 | 0.689617  | -1.730033 |
| Mg24 | 2.822340  | 3.004028  | -1.356249 |
| Mg25 | -1.000436 | 2.236255  | 1.699302  |

@mg25-isomer12 bp86/6-31G(d) Etot=-5002.373640 Eb=-15.84

|      |           |           |           |
|------|-----------|-----------|-----------|
| Mg1  | -0.474885 | 3.985561  | -0.512355 |
| Mg2  | 0.909020  | 1.990485  | 1.399541  |
| Mg3  | -0.736001 | -3.021287 | -2.384378 |
| Mg4  | 1.932583  | -1.352626 | -2.446379 |
| Mg5  | 2.227540  | 0.007067  | 3.348780  |
| Mg6  | -2.079266 | 2.057697  | 1.502406  |
| Mg7  | -2.194741 | 1.720987  | -1.970672 |
| Mg8  | -2.143737 | -3.288351 | 0.473457  |
| Mg9  | -3.258508 | -1.296867 | -1.941968 |
| Mg10 | -3.490099 | 3.903467  | -0.426046 |
| Mg11 | 0.898041  | -3.421504 | 0.053676  |
| Mg12 | 4.075838  | 1.697919  | 1.258692  |
| Mg13 | -0.683144 | 0.584697  | 3.718736  |
| Mg14 | 0.930456  | 1.508715  | -1.830185 |
| Mg15 | -0.717991 | -0.340763 | -3.536363 |
| Mg16 | -0.033134 | -2.051999 | 2.609297  |
| Mg17 | 3.939502  | 1.190812  | -1.826516 |
| Mg18 | -0.846909 | -0.405649 | -0.069689 |
| Mg19 | -2.963991 | -0.856675 | 2.361808  |
| Mg20 | 3.856680  | -3.483191 | -0.035550 |
| Mg21 | -4.371547 | 0.767082  | 0.015040  |
| Mg22 | 5.255349  | -0.855699 | -0.046392 |
| Mg23 | 2.687522  | 3.788759  | -0.594911 |
| Mg24 | -4.865777 | -2.181422 | 0.441753  |
| Mg25 | 2.147199  | -0.647215 | 0.438216  |

@mg25-isomer13 bp86/6-31G(d) Etot=-5002.372332 Eb=-15.81

|     |           |           |          |
|-----|-----------|-----------|----------|
| Mg1 | -1.449415 | -0.018841 | 0.201314 |
| Mg2 | 1.418649  | 3.130896  | 0.648217 |

|      |           |           |           |
|------|-----------|-----------|-----------|
| Mg3  | -2.881289 | -2.531341 | -1.363598 |
| Mg4  | -4.070376 | -1.374568 | 1.317774  |
| Mg5  | 0.184642  | 2.081318  | -2.086153 |
| Mg6  | 3.139928  | 2.536393  | -1.728234 |
| Mg7  | -0.288505 | -0.962484 | -2.454981 |
| Mg8  | 1.518616  | 0.040433  | 0.023256  |
| Mg9  | 2.508625  | -2.297765 | -1.865594 |
| Mg10 | -3.905635 | 1.687774  | 0.816646  |
| Mg11 | -0.065857 | -3.681954 | -1.164593 |
| Mg12 | 0.169706  | -0.777674 | 2.847775  |
| Mg13 | -0.844640 | 2.065564  | 2.354377  |
| Mg14 | 4.580711  | -0.026223 | -1.810616 |
| Mg15 | -1.500645 | 3.555185  | -0.088620 |
| Mg16 | -1.410407 | -2.957633 | 1.421642  |
| Mg17 | 3.222834  | -1.040805 | 3.205010  |
| Mg18 | 4.300206  | -1.706361 | 0.572115  |
| Mg19 | -2.885277 | 1.750421  | -2.165723 |
| Mg20 | 2.020621  | 1.710637  | 3.287046  |
| Mg21 | 1.620221  | -2.913658 | 1.252497  |
| Mg22 | 4.095337  | 1.381591  | 1.050943  |
| Mg23 | 2.221393  | 0.389728  | -3.663658 |
| Mg24 | -6.761650 | 0.267983  | 0.839900  |
| Mg25 | -4.937793 | -0.308615 | -1.446741 |

@mg25-isomer14 bp86/6-31G(d) Etot=-5002.372271 Eb=-15.81

|      |           |           |           |
|------|-----------|-----------|-----------|
| Mg1  | -0.422161 | 0.854158  | 3.204696  |
| Mg2  | -0.062197 | 4.501918  | -1.727456 |
| Mg3  | -0.109465 | 2.894002  | 0.865106  |
| Mg4  | 2.538526  | 3.172812  | -1.208717 |
| Mg5  | -2.829233 | 2.468368  | 2.193789  |
| Mg6  | 2.254612  | 1.214861  | 1.397290  |
| Mg7  | 2.085269  | -0.742649 | 3.718672  |
| Mg8  | -2.600582 | 2.953018  | -0.892480 |
| Mg9  | 4.834478  | 1.455948  | -0.400452 |
| Mg10 | 4.724882  | -0.492407 | 1.904151  |
| Mg11 | -0.334840 | -2.124872 | 2.527151  |
| Mg12 | -4.727599 | 1.285762  | 0.269670  |
| Mg13 | -0.264084 | 1.628772  | -2.434437 |
| Mg14 | -0.545171 | -0.157189 | 0.084071  |
| Mg15 | 2.255221  | -1.922372 | 0.806187  |
| Mg16 | 2.320752  | 0.140243  | -1.774294 |
| Mg17 | -3.118130 | -0.544059 | 2.207616  |
| Mg18 | -2.600930 | -3.210655 | 0.899799  |
| Mg19 | 4.764389  | -1.532765 | -0.984594 |
| Mg20 | -2.971094 | 0.124395  | -2.074025 |
| Mg21 | -0.026916 | -3.261214 | -0.624193 |
| Mg22 | -4.726963 | -1.647568 | -0.319258 |
| Mg23 | -0.250402 | -1.359574 | -3.017538 |
| Mg24 | 2.486392  | -2.799614 | -2.467651 |
| Mg25 | -2.674755 | -2.899317 | -2.153103 |

@mg25-isomer15 bp86/6-31G(d) Etot=-5002.369873 Eb=-15.75

|      |           |           |           |
|------|-----------|-----------|-----------|
| Mg1  | 0.117350  | 2.485191  | -1.866933 |
| Mg2  | -1.316474 | 0.130482  | 0.024026  |
| Mg3  | 2.466045  | 0.317619  | 1.797304  |
| Mg4  | 3.044325  | 2.399655  | -0.441880 |
| Mg5  | -2.890855 | 2.602195  | -2.676452 |
| Mg6  | -1.172429 | -0.010009 | -3.068125 |
| Mg7  | 1.526337  | -0.099555 | -1.284671 |
| Mg8  | -1.885112 | -2.407566 | 2.723847  |
| Mg9  | 4.227668  | -2.215449 | 1.366449  |
| Mg10 | -2.839421 | -2.554106 | -2.413214 |
| Mg11 | -4.109063 | 1.550824  | 0.452995  |
| Mg12 | 0.456744  | 2.421399  | 1.230763  |

|      |           |           |           |
|------|-----------|-----------|-----------|
| Mg13 | 5.513011  | 0.683900  | 1.470974  |
| Mg14 | 0.725189  | -2.051436 | 1.063128  |
| Mg15 | 0.105129  | -2.598595 | -2.042598 |
| Mg16 | -2.206172 | 2.450597  | 2.658895  |
| Mg17 | 3.022667  | -3.109014 | -1.216490 |
| Mg18 | -4.136085 | 0.047392  | -2.156040 |
| Mg19 | -0.368670 | 0.122036  | 3.125663  |
| Mg20 | -1.987591 | 3.590511  | -0.066119 |
| Mg21 | 5.953870  | 2.205341  | -1.102094 |
| Mg22 | -3.560689 | -0.059307 | 3.143186  |
| Mg23 | -3.813439 | -1.570250 | 0.436895  |
| Mg24 | -1.650773 | -3.707794 | 0.072149  |
| Mg25 | 4.778441  | -0.624061 | -1.231658 |

@mg25-isomer16 bp86/6-31G(d) Etot=-5002.368247 Eb=-15.71

|      |           |           |           |
|------|-----------|-----------|-----------|
| Mg1  | -0.640737 | 0.776333  | 1.873332  |
| Mg2  | 3.272730  | 0.298178  | -2.748580 |
| Mg3  | -3.360398 | -3.272647 | -0.755084 |
| Mg4  | 2.522518  | -3.755148 | 0.259685  |
| Mg5  | 4.326963  | -2.018147 | -1.214488 |
| Mg6  | -1.530511 | -0.687535 | -0.836898 |
| Mg7  | 1.233473  | -2.322472 | -2.282114 |
| Mg8  | 4.482468  | 0.824715  | -0.014682 |
| Mg9  | -2.739669 | 1.211665  | -2.938485 |
| Mg10 | 3.711375  | 3.492734  | 1.200791  |
| Mg11 | 2.465999  | 0.986225  | 2.407600  |
| Mg12 | 1.497339  | -0.346385 | -0.113156 |
| Mg13 | -2.052297 | -2.018235 | 2.151000  |
| Mg14 | -0.428430 | -3.463729 | 0.041757  |
| Mg15 | -4.665771 | -0.430375 | -1.211142 |
| Mg16 | -0.944351 | 2.625660  | -0.963572 |
| Mg17 | -2.408702 | 3.507061  | 1.566873  |
| Mg18 | 0.739553  | 3.503231  | 1.356887  |
| Mg19 | -3.606920 | 0.698875  | 1.550738  |
| Mg20 | 0.293446  | 0.753373  | -2.898844 |
| Mg21 | -5.022805 | -1.988822 | 1.370551  |
| Mg22 | 0.945708  | -2.053770 | 2.461252  |
| Mg23 | 2.133212  | 2.682628  | -1.322011 |
| Mg24 | 3.951118  | -1.638951 | 1.780120  |
| Mg25 | -4.175310 | 2.635537  | -0.721530 |

@mg25-isomer17 bp86/6-31G(d) Etot=-5002.367965 Eb=-15.70

|      |           |           |           |
|------|-----------|-----------|-----------|
| Mg1  | 2.339290  | -0.870968 | -2.899183 |
| Mg2  | 0.625844  | -2.948631 | -0.935031 |
| Mg3  | -6.307006 | 0.087233  | 0.252065  |
| Mg4  | 3.454597  | 1.861194  | -2.031237 |
| Mg5  | -0.683148 | -2.101499 | 1.872961  |
| Mg6  | 1.007677  | 2.696226  | 2.630436  |
| Mg7  | 1.772226  | -0.259381 | -0.067949 |
| Mg8  | -1.218107 | 0.741049  | 3.164514  |
| Mg9  | 0.859001  | 1.780117  | -3.471157 |
| Mg10 | -0.706829 | -0.696863 | -2.627998 |
| Mg11 | -1.697904 | 2.335902  | -1.925619 |
| Mg12 | -1.455378 | 3.390125  | 1.115552  |
| Mg13 | 3.556618  | 1.811317  | 1.138282  |
| Mg14 | 5.351682  | -0.010552 | -0.732981 |
| Mg15 | -1.038803 | 0.375493  | 0.192968  |
| Mg16 | -5.367086 | -2.512840 | -0.596766 |
| Mg17 | -2.296589 | -2.736119 | -0.770077 |
| Mg18 | -3.728963 | -0.106310 | -1.676579 |
| Mg19 | 2.107088  | -3.011393 | 1.777620  |
| Mg20 | -4.003801 | 2.115382  | 0.437722  |
| Mg21 | 4.446812  | -1.049375 | 1.873807  |
| Mg22 | 1.661514  | -0.256362 | 3.017957  |



|      |           |           |           |
|------|-----------|-----------|-----------|
| Mg23 | 3.824724  | -2.619793 | -0.713793 |
| Mg24 | 1.034835  | 2.817204  | -0.492905 |
| Mg25 | -3.538295 | -0.831159 | 1.467393  |

@mg25-isomer18 bp86/6-31G(d) Etot=-5002.366426 Eb=-15.66

|      |           |           |           |
|------|-----------|-----------|-----------|
| Mg1  | -0.014977 | 0.020732  | 2.959018  |
| Mg2  | -0.441328 | -0.663281 | -0.221738 |
| Mg3  | 2.454730  | -1.796795 | 2.411689  |
| Mg4  | -0.665759 | 2.294770  | -1.181988 |
| Mg5  | -4.860124 | -0.192635 | 1.029618  |
| Mg6  | -2.811457 | -1.300436 | 2.884119  |
| Mg7  | 2.018524  | 0.811466  | 0.927746  |
| Mg8  | -0.258758 | -3.670890 | -0.932408 |
| Mg9  | -4.714931 | 2.804668  | -0.041218 |
| Mg10 | 0.214406  | 3.070993  | 1.700837  |
| Mg11 | -3.024418 | -2.518813 | 0.122005  |
| Mg12 | 1.725500  | 0.730274  | -2.256997 |
| Mg13 | 2.250145  | 3.372383  | -0.682118 |
| Mg14 | 4.737289  | 2.680382  | 1.169636  |
| Mg15 | -0.444534 | -2.918604 | 2.034575  |
| Mg16 | -1.015414 | 0.421966  | -3.614747 |
| Mg17 | 0.683202  | -1.956346 | -3.324857 |
| Mg18 | -2.243142 | 1.363215  | 1.410329  |
| Mg19 | -3.082450 | 0.327251  | -1.377211 |
| Mg20 | 2.442260  | -1.858281 | -0.710943 |
| Mg21 | 4.716243  | 1.537720  | -1.571281 |
| Mg22 | 4.830700  | -0.417201 | 0.801951  |
| Mg23 | 2.077321  | -4.403230 | 0.942422  |
| Mg24 | -2.283724 | 4.508638  | 0.313575  |
| Mg25 | -2.289304 | -2.247947 | -2.792016 |

@mg25-isomer19 bp86/6-31G(d) Etot=-5002.363472 Eb=-15.59

|      |           |           |           |
|------|-----------|-----------|-----------|
| Mg1  | -2.453460 | -3.588707 | -1.415169 |
| Mg2  | -0.417304 | -0.662338 | 0.420725  |
| Mg3  | 2.653384  | -2.475262 | -2.177760 |
| Mg4  | 0.294120  | 2.419228  | 0.892155  |
| Mg5  | -4.589682 | 1.095898  | -1.000805 |
| Mg6  | -3.367697 | -1.081855 | -2.614796 |
| Mg7  | 1.813034  | 0.425190  | -1.404280 |
| Mg8  | -1.121657 | -3.393144 | 1.378371  |
| Mg9  | -4.735887 | 3.907657  | 0.055265  |
| Mg10 | 0.783494  | 3.238334  | -2.011817 |
| Mg11 | -3.566356 | -1.489338 | 0.466120  |
| Mg12 | 2.319984  | 0.322870  | 1.787580  |
| Mg13 | 3.154643  | 3.070708  | -0.020016 |
| Mg14 | 5.208204  | 1.589581  | -1.703484 |
| Mg15 | -0.296291 | -1.577427 | -2.601781 |
| Mg16 | -0.298552 | 0.990734  | 3.516472  |
| Mg17 | 0.592560  | -1.787928 | 3.466622  |
| Mg18 | -1.460509 | 1.155117  | -1.763856 |
| Mg19 | -2.554040 | 1.370086  | 1.348907  |
| Mg20 | 1.994864  | -2.627552 | 0.798560  |
| Mg21 | 5.334518  | 1.496633  | 1.294212  |
| Mg22 | 4.423049  | -0.988703 | -0.221833 |
| Mg23 | 0.491523  | -4.258209 | -1.198026 |
| Mg24 | -1.850616 | 4.040276  | -0.526219 |
| Mg25 | -2.351329 | -1.191846 | 3.234851  |

@mg25-isomer20 bp86/6-31G(d) Etot=-5002.363319 Eb=-15.58

|     |           |           |           |
|-----|-----------|-----------|-----------|
| Mg1 | 3.121735  | 1.836357  | -1.966740 |
| Mg2 | -4.872816 | 2.576756  | -0.683607 |
| Mg3 | 1.793301  | -3.760443 | 1.233514  |
| Mg4 | 0.117944  | 1.169578  | -2.168169 |
| Mg5 | 4.777120  | 1.279881  | 0.518628  |

|      |           |           |           |
|------|-----------|-----------|-----------|
| Mg6  | 3.976725  | -1.668856 | 1.071001  |
| Mg7  | -2.920609 | 0.575381  | -2.393654 |
| Mg8  | 1.558040  | -1.626789 | -0.996209 |
| Mg9  | -0.689585 | 0.165797  | 3.116262  |
| Mg10 | -3.463806 | -2.454500 | -1.860851 |
| Mg11 | -0.355593 | 2.961708  | 2.098311  |
| Mg12 | -1.851282 | 2.882659  | -0.626549 |
| Mg13 | 1.818152  | -1.450567 | 3.152998  |
| Mg14 | 1.045872  | 3.527551  | -0.509415 |
| Mg15 | 2.080441  | -0.598541 | -3.748079 |
| Mg16 | 3.001748  | 3.252091  | 1.946981  |
| Mg17 | 4.543529  | -0.738746 | -1.758073 |
| Mg18 | -0.797614 | -2.762346 | 2.331113  |
| Mg19 | -0.748622 | -1.612134 | -3.102163 |
| Mg20 | -4.799317 | -0.359406 | -0.108603 |
| Mg21 | -3.290787 | 1.559688  | 1.801005  |
| Mg22 | 1.550196  | 0.694146  | 0.864854  |
| Mg23 | -1.242879 | -0.396157 | 0.130177  |
| Mg24 | -3.562971 | -1.585823 | 2.242686  |
| Mg25 | -0.788923 | -3.467285 | -0.585416 |

@mg25-isomer21 bp86/6-31G(d) Etot=-5002.362508 Eb=-15.56

|      |           |           |           |
|------|-----------|-----------|-----------|
| Mg1  | 1.016064  | -0.197439 | 0.174886  |
| Mg2  | -2.620652 | -1.714368 | -0.869021 |
| Mg3  | 0.136985  | -3.174870 | -0.051434 |
| Mg4  | -0.779141 | -3.045967 | -3.005615 |
| Mg5  | 1.383771  | -2.573060 | 2.715901  |
| Mg6  | 2.143519  | 1.251790  | -2.406615 |
| Mg7  | -0.382655 | 2.906608  | -1.895200 |
| Mg8  | -4.943493 | 0.515226  | -1.067176 |
| Mg9  | 1.936573  | -1.838234 | -2.234712 |
| Mg10 | -1.992335 | 1.413091  | 3.034547  |
| Mg11 | 0.200963  | 2.705370  | 1.265366  |
| Mg12 | 1.010952  | 0.382102  | 3.251854  |
| Mg13 | 4.829637  | 2.500010  | -1.295448 |
| Mg14 | -2.532373 | -4.843834 | -1.026242 |
| Mg15 | -4.203694 | -0.615745 | 1.683750  |
| Mg16 | 4.213536  | -0.435416 | -0.636094 |
| Mg17 | -4.520820 | 2.361644  | 1.289970  |
| Mg18 | 3.796925  | -0.927655 | 2.429423  |
| Mg19 | -1.876896 | 1.020148  | -0.038383 |
| Mg20 | 3.224485  | -3.064784 | 0.334035  |
| Mg21 | 3.082874  | 1.766990  | 1.260332  |
| Mg22 | -0.577580 | -0.092127 | -2.672260 |
| Mg23 | -3.495488 | 3.243483  | -1.520703 |
| Mg24 | 2.233052  | 3.879488  | -0.792229 |
| Mg25 | -1.284209 | -1.422452 | 2.071069  |

@mg25-isomer22 bp86/6-31G(d) Etot=-5002.361793 Eb=-15.55

|      |           |           |           |
|------|-----------|-----------|-----------|
| Mg1  | -1.600248 | 2.390081  | 2.672928  |
| Mg2  | 0.666383  | 0.434459  | 2.661981  |
| Mg3  | 0.335084  | -2.485778 | 1.727094  |
| Mg4  | 3.010722  | -3.511945 | 0.412451  |
| Mg5  | 5.156426  | -1.305219 | 0.430012  |
| Mg6  | -4.239036 | -0.348975 | -0.456512 |
| Mg7  | -3.089131 | 2.087586  | -1.780400 |
| Mg8  | -4.318339 | -2.975046 | -1.917806 |
| Mg9  | -2.447982 | -0.786255 | 2.187077  |
| Mg10 | -4.107440 | 2.069648  | 1.171652  |
| Mg11 | 0.858989  | 2.934007  | 0.949618  |
| Mg12 | -4.662588 | -2.850076 | 1.204330  |
| Mg13 | -2.141850 | 4.166748  | 0.242589  |
| Mg14 | -1.924463 | -2.975141 | -0.086537 |
| Mg15 | 4.502824  | 0.948888  | -1.514151 |

|      |           |           |           |
|------|-----------|-----------|-----------|
| Mg16 | 0.568017  | -2.411439 | -1.595448 |
| Mg17 | 3.549221  | -1.838059 | -2.094665 |
| Mg18 | -1.946525 | -0.983215 | -2.550487 |
| Mg19 | 3.843295  | 1.502295  | 1.547489  |
| Mg20 | 2.795085  | 3.337339  | -1.280653 |
| Mg21 | -0.196892 | 3.203011  | -1.908249 |
| Mg22 | 3.195273  | -1.439110 | 2.643543  |
| Mg23 | 1.219820  | 0.584376  | -2.626485 |
| Mg24 | 1.993829  | -0.285808 | 0.077993  |
| Mg25 | -1.020474 | 0.537629  | -0.117364 |

@mg25-isomer23 bp86/6-31G(d) Etot=-5002.357405 Eb=-15.44

|      |           |           |           |
|------|-----------|-----------|-----------|
| Mg1  | -0.153782 | 0.046703  | -0.018630 |
| Mg2  | -1.202976 | -0.575534 | -3.041140 |
| Mg3  | 2.113522  | -1.724891 | 1.444253  |
| Mg4  | -1.839255 | -3.244731 | -1.785954 |
| Mg5  | -3.957390 | -3.050505 | 0.374803  |
| Mg6  | 0.986304  | -2.332429 | -1.625831 |
| Mg7  | 4.163044  | 0.840673  | 1.241825  |
| Mg8  | -0.529033 | 2.518849  | -2.223683 |
| Mg9  | 3.656250  | -1.088638 | -1.173333 |
| Mg10 | -3.659382 | 2.243429  | 1.529293  |
| Mg11 | -2.909543 | 0.956958  | -1.095548 |
| Mg12 | 6.582271  | -0.119756 | -0.447647 |
| Mg13 | -0.763700 | -2.957289 | 1.007385  |
| Mg14 | -0.727553 | 2.919462  | 0.959559  |
| Mg15 | 1.717140  | 0.505274  | -2.890905 |
| Mg16 | -2.607676 | -0.623445 | 1.673883  |
| Mg17 | 1.970067  | 2.463618  | -0.345499 |
| Mg18 | 4.512784  | 1.808733  | -1.716612 |
| Mg19 | 1.384411  | 1.161511  | 2.501450  |
| Mg20 | -0.119915 | -1.318192 | 3.570478  |
| Mg21 | -5.394796 | -0.285447 | 0.309945  |
| Mg22 | -1.399630 | 1.433663  | 3.522925  |
| Mg23 | -2.821018 | 4.032487  | -0.933595 |
| Mg24 | -4.206225 | -1.492242 | -2.221047 |
| Mg25 | 5.206080  | -2.118263 | 1.383626  |

@mg25-isomer24 bp86/6-31G(d) Etot=-5002.357306 Eb=-15.43

|      |           |           |           |
|------|-----------|-----------|-----------|
| Mg1  | 0.626291  | 2.146643  | 1.846062  |
| Mg2  | 0.115488  | 1.171364  | -3.390796 |
| Mg3  | -2.314407 | 2.786568  | 1.471217  |
| Mg4  | 1.742762  | -0.378724 | 0.067735  |
| Mg5  | -0.634108 | -2.366545 | 0.533581  |
| Mg6  | 1.469833  | -3.284021 | -1.385014 |
| Mg7  | 1.906298  | -0.258328 | 3.162909  |
| Mg8  | 2.437892  | 2.109513  | -1.660264 |
| Mg9  | -0.610666 | -1.670830 | -2.772493 |
| Mg10 | -0.255132 | 3.297761  | -1.002739 |
| Mg11 | -1.051529 | 0.507615  | -0.456879 |
| Mg12 | 2.187058  | -2.988627 | 1.649607  |
| Mg13 | -1.233535 | -0.044955 | 2.663485  |
| Mg14 | -4.330532 | 0.605254  | 1.400716  |
| Mg15 | 2.282502  | 4.279293  | 0.420312  |
| Mg16 | 2.401205  | -0.866707 | -2.938736 |
| Mg17 | -5.993655 | 0.242737  | -1.304344 |
| Mg18 | 4.724525  | 0.238032  | -0.962663 |
| Mg19 | -3.282114 | -2.175717 | 2.006533  |
| Mg20 | 4.586895  | -1.098107 | 1.861594  |
| Mg21 | -3.587167 | 2.054726  | -1.234199 |
| Mg22 | -5.825324 | -2.092882 | 0.494849  |
| Mg23 | 3.604222  | 1.768453  | 1.472012  |
| Mg24 | 4.297732  | -2.630669 | -0.805100 |
| Mg25 | -3.264535 | -1.351846 | -1.137387 |

@mg25-isomer25 bp86/6-31G(d) Etot=-5002.356121 Eb=-15.40

|      |           |           |           |
|------|-----------|-----------|-----------|
| Mg1  | 0.945000  | -1.005709 | 3.586746  |
| Mg2  | 5.411968  | 0.934132  | -1.482467 |
| Mg3  | -1.163009 | -2.910548 | 2.629144  |
| Mg4  | 0.469547  | 3.566360  | -0.263524 |
| Mg5  | -1.304245 | -1.247503 | -2.905082 |
| Mg6  | 4.567075  | 2.278174  | 1.157710  |
| Mg7  | 1.620221  | -0.483713 | -3.480472 |
| Mg8  | 1.385772  | -2.907609 | 0.897711  |
| Mg9  | -4.948104 | 2.769770  | 0.398108  |
| Mg10 | -4.103055 | -2.006956 | -1.648083 |
| Mg11 | 2.394844  | 1.415583  | -0.997381 |
| Mg12 | 0.149278  | -0.321825 | -0.044184 |
| Mg13 | -2.414703 | 3.502594  | -1.361745 |
| Mg14 | 0.969987  | -3.067580 | -2.149513 |
| Mg15 | 1.006109  | 1.802554  | 2.160020  |
| Mg16 | 3.352193  | -1.552706 | -1.172388 |
| Mg17 | 3.086017  | -0.410867 | 1.622090  |
| Mg18 | -0.323459 | 1.604895  | -2.425775 |
| Mg19 | 6.173799  | -0.417234 | 1.001998  |
| Mg20 | -1.826768 | 2.839097  | 1.472011  |
| Mg21 | -3.766866 | -1.937631 | 1.333474  |
| Mg22 | -1.455088 | -3.034112 | -0.392364 |
| Mg23 | -2.666556 | 0.499390  | -0.552244 |
| Mg24 | -1.696435 | 0.065568  | 2.477165  |
| Mg25 | -5.863523 | 0.025875  | 0.139048  |

@mg25-isomer26 bp86/6-31G(d) Etot=-5002.354365 Eb=-15.36

|      |           |           |           |
|------|-----------|-----------|-----------|
| Mg1  | 1.419668  | 1.106452  | 1.566980  |
| Mg2  | 4.299515  | -1.143211 | -0.386364 |
| Mg3  | 0.260975  | -1.131715 | -0.203813 |
| Mg4  | 4.412899  | 0.724569  | 2.013758  |
| Mg5  | -0.086395 | 0.868518  | -4.189878 |
| Mg6  | -1.978056 | -3.610085 | 1.432764  |
| Mg7  | -2.302333 | 1.027506  | -2.048043 |
| Mg8  | 2.369535  | -3.333845 | -1.009897 |
| Mg9  | -4.104625 | 3.296783  | -0.160125 |
| Mg10 | 4.309742  | 3.736007  | 1.412873  |
| Mg11 | 0.916825  | -4.156441 | 1.444611  |
| Mg12 | 2.172580  | -0.523941 | -2.543180 |
| Mg13 | -4.823612 | 0.378030  | -0.158374 |
| Mg14 | 1.691164  | 4.361889  | 0.139499  |
| Mg15 | -2.754859 | -1.825588 | -0.869272 |
| Mg16 | 0.502520  | 1.872352  | -1.320022 |
| Mg17 | -0.632591 | -1.847086 | -3.144729 |
| Mg18 | -3.460324 | -1.124982 | 2.169133  |
| Mg19 | 2.651022  | -1.770751 | 2.028278  |
| Mg20 | -0.619653 | -4.227021 | -1.157513 |
| Mg21 | -1.637189 | 1.098898  | 0.889541  |
| Mg22 | -1.288550 | 4.077233  | -0.263208 |
| Mg23 | 3.417080  | 1.729012  | -0.729014 |
| Mg24 | -4.372358 | 1.793738  | 2.406111  |
| Mg25 | -0.362979 | -1.376321 | 2.679884  |

@mg25-isomer27 bp86/6-31G(d) Etot=-5002.353068 Eb=-15.33

|     |           |           |           |
|-----|-----------|-----------|-----------|
| Mg1 | -0.914999 | 0.790564  | -0.042415 |
| Mg2 | 1.871088  | -0.155721 | -0.817955 |
| Mg3 | -3.009122 | 1.010450  | -2.793703 |
| Mg4 | 2.316157  | -0.384837 | 2.312014  |
| Mg5 | -0.657777 | -1.195663 | -2.339186 |
| Mg6 | -3.794738 | -1.566773 | -1.491442 |
| Mg7 | 4.844405  | 0.839962  | -1.456156 |
| Mg8 | -0.073827 | 4.094655  | -0.397328 |

|      |           |           |           |
|------|-----------|-----------|-----------|
| Mg9  | 1.041398  | 2.425299  | 1.786885  |
| Mg10 | 3.186966  | -3.079846 | 1.099452  |
| Mg11 | -0.006385 | 2.063833  | -2.653217 |
| Mg12 | 5.198402  | -0.874547 | 1.109009  |
| Mg13 | -4.471844 | -4.198467 | 0.151404  |
| Mg14 | 4.332462  | -2.176448 | -1.511098 |
| Mg15 | -2.816078 | -1.663909 | 1.451766  |
| Mg16 | -4.116106 | 1.039687  | 0.073242  |
| Mg17 | -2.111031 | 2.920627  | 1.723492  |
| Mg18 | -0.751586 | 0.152028  | 2.924432  |
| Mg19 | 0.167927  | -2.228080 | 1.265468  |
| Mg20 | 4.082959  | 1.893977  | 1.251313  |
| Mg21 | -2.821811 | 3.520541  | -1.304339 |
| Mg22 | 2.462501  | 2.877342  | -1.138963 |
| Mg23 | 1.421766  | -3.208646 | -1.439219 |
| Mg24 | -1.543166 | -3.589957 | -0.744684 |
| Mg25 | -3.837558 | 0.693931  | 2.981228  |

@mg25-isomer28 bp86/6-31G(d) Etot=-5002.352515 Eb=-15.31

|      |           |           |           |
|------|-----------|-----------|-----------|
| Mg1  | -0.341560 | -0.352593 | -3.340403 |
| Mg2  | 2.793485  | -3.293172 | -0.574441 |
| Mg3  | 4.751571  | -2.314638 | 1.585025  |
| Mg4  | -2.813916 | 1.538622  | -2.252348 |
| Mg5  | -4.050442 | -0.089651 | 0.106894  |
| Mg6  | -0.852994 | 0.450941  | -0.109770 |
| Mg7  | 5.286862  | -1.817987 | -1.390851 |
| Mg8  | -2.398214 | 0.659090  | 2.704914  |
| Mg9  | -0.613352 | -1.636977 | 3.898888  |
| Mg10 | -0.000049 | -2.521726 | -1.214029 |
| Mg11 | 0.548652  | 2.250540  | -2.200792 |
| Mg12 | -2.782120 | -1.544695 | -2.151639 |
| Mg13 | 1.330381  | -1.362695 | 1.470112  |
| Mg14 | -2.341367 | -4.467526 | -0.843212 |
| Mg15 | -0.742902 | 3.080073  | 1.818602  |
| Mg16 | -4.848476 | -3.019458 | -0.261458 |
| Mg17 | 4.643315  | 0.468546  | 0.447557  |
| Mg18 | 1.830468  | 1.623440  | 0.974629  |
| Mg19 | -1.592926 | 4.002459  | -1.073543 |
| Mg20 | 2.181806  | -0.305352 | -1.549227 |
| Mg21 | -3.560755 | 2.712726  | 0.699238  |
| Mg22 | 3.507230  | 2.603544  | -1.363603 |
| Mg23 | -1.862489 | -2.082769 | 1.172390  |
| Mg24 | 0.561959  | 0.961779  | 3.613044  |
| Mg25 | 1.365832  | 4.457477  | -0.165979 |

@mg25-isomer29 bp86/6-31G(d) Etot=-5002.351545 Eb=-15.29

|      |           |           |           |
|------|-----------|-----------|-----------|
| Mg1  | -1.171522 | 0.139622  | -0.160909 |
| Mg2  | -3.525563 | 1.259263  | -2.025075 |
| Mg3  | 2.044039  | 1.261976  | 2.024391  |
| Mg4  | 1.425359  | -1.381018 | 0.430079  |
| Mg5  | -0.867860 | 0.913971  | -3.397014 |
| Mg6  | 1.387164  | 1.214900  | -1.351664 |
| Mg7  | -1.021921 | 3.079440  | -1.154309 |
| Mg8  | -5.318008 | 0.528874  | 0.390667  |
| Mg9  | -2.211458 | -1.590681 | -2.658039 |
| Mg10 | -0.166126 | -0.411035 | 2.993865  |
| Mg11 | -3.026321 | 0.546581  | 2.358664  |
| Mg12 | -2.543967 | -2.118217 | 3.613279  |
| Mg13 | -3.000919 | -2.045049 | 0.472639  |
| Mg14 | -0.744361 | 2.516338  | 1.917265  |
| Mg15 | 4.189038  | 1.989368  | 0.059829  |
| Mg16 | 6.309344  | -2.190117 | -0.740187 |
| Mg17 | -0.372218 | -3.301995 | 1.975997  |
| Mg18 | -5.189508 | -1.422384 | -1.759156 |

|      |           |           |           |
|------|-----------|-----------|-----------|
| Mg19 | 0.881723  | -1.460954 | -2.806651 |
| Mg20 | -3.480705 | 2.932702  | 0.543364  |
| Mg21 | 1.581330  | 3.727758  | 0.390107  |
| Mg22 | 4.578749  | -0.761589 | 1.436471  |
| Mg23 | 6.979072  | 0.612532  | 0.050207  |
| Mg24 | 3.784027  | -0.682225 | -1.618360 |
| Mg25 | -0.519389 | -3.358063 | -0.985457 |

@mg25-isomer30 bp86/6-31G(d) Etot=-5002.279388 Eb=-13.48

|      |           |           |           |
|------|-----------|-----------|-----------|
| Mg1  | 1.698086  | -1.712780 | 0.512165  |
| Mg2  | 3.083935  | 0.882345  | -0.426556 |
| Mg3  | -1.138132 | -0.890642 | -1.655032 |
| Mg4  | -0.254123 | -3.677538 | -0.778975 |
| Mg5  | -4.129471 | -0.312554 | -1.395214 |
| Mg6  | 0.786197  | 1.504069  | -2.321425 |
| Mg7  | -1.115201 | -1.340590 | 1.633120  |
| Mg8  | -6.130782 | 0.463571  | 1.654895  |
| Mg9  | 1.809061  | 0.205416  | 2.728078  |
| Mg10 | 4.536857  | -1.748806 | -1.119510 |
| Mg11 | 4.507467  | -0.814748 | 1.828739  |
| Mg12 | 0.019556  | 1.259516  | 0.627650  |
| Mg13 | -3.145621 | -2.957681 | -0.365586 |
| Mg14 | 1.833767  | 3.666436  | -0.376608 |
| Mg15 | -7.168081 | 0.274760  | -1.133053 |
| Mg16 | 1.929883  | 6.773631  | 0.380796  |
| Mg17 | -6.116153 | -2.228325 | 0.104949  |
| Mg18 | -2.215919 | 2.013213  | -1.314787 |
| Mg19 | 7.634936  | -1.773442 | -1.118380 |
| Mg20 | 1.833810  | -1.395107 | -2.404711 |
| Mg21 | -4.039019 | -1.590332 | 2.287470  |
| Mg22 | -3.070863 | 1.158243  | 1.582932  |
| Mg23 | 6.354997  | 0.840157  | -0.270728 |
| Mg24 | 7.576081  | -1.024054 | 1.759655  |
| Mg25 | -5.081271 | 2.425242  | -0.419884 |

@mg26-isomer01 bp86/6-31G(d) Etot=-5202.496575 Eb=-16.52

|      |           |           |           |
|------|-----------|-----------|-----------|
| Mg1  | 3.352760  | -2.210627 | 2.349690  |
| Mg2  | -4.662709 | -1.277923 | 0.956439  |
| Mg3  | -1.774373 | 0.050986  | 0.225600  |
| Mg4  | 3.071933  | 2.231725  | -1.247086 |
| Mg5  | 1.510654  | 1.125752  | -3.702151 |
| Mg6  | -3.389122 | 0.614340  | 2.909705  |
| Mg7  | 4.297314  | 2.783013  | 1.514763  |
| Mg8  | -4.749904 | 1.721139  | 0.484689  |
| Mg9  | 3.954724  | -0.364189 | -2.551517 |
| Mg10 | -0.392791 | 1.524258  | 2.996606  |
| Mg11 | 2.909999  | -2.542532 | -0.655741 |
| Mg12 | 4.439847  | -0.088409 | 0.438451  |
| Mg13 | 1.409316  | -1.784845 | -3.312977 |
| Mg14 | -3.216609 | -2.640624 | -1.372743 |
| Mg15 | 0.229253  | -1.281321 | 2.467444  |
| Mg16 | -3.099320 | 2.400748  | -1.942747 |
| Mg17 | 2.524969  | 0.705539  | 2.780147  |
| Mg18 | 1.220822  | 0.060397  | -0.164557 |
| Mg19 | -1.913446 | 3.083646  | 0.928577  |
| Mg20 | -1.140987 | -0.195106 | -2.766079 |
| Mg21 | -0.156329 | -2.574509 | -0.941665 |
| Mg22 | -4.547511 | -0.088862 | -1.923658 |
| Mg23 | 1.223092  | 3.125458  | 1.132775  |
| Mg24 | -0.033080 | 2.487343  | -1.523954 |
| Mg25 | -2.057119 | -2.933333 | 1.464479  |
| Mg26 | 0.988616  | -3.932064 | 1.455508  |

@mg26-isomer02 bp86/6-31G(d) Etot=-5202.496422 Eb=-16.52

|      |           |           |           |
|------|-----------|-----------|-----------|
| Mg1  | -3.479475 | 1.878797  | -2.122967 |
| Mg2  | 3.680297  | 3.014423  | -0.212565 |
| Mg3  | 0.508980  | -1.492855 | -2.661939 |
| Mg4  | -4.196685 | 2.185052  | 0.848157  |
| Mg5  | 3.657396  | 0.712514  | 2.012237  |
| Mg6  | 4.193427  | -2.179805 | 0.869352  |
| Mg7  | -0.890567 | -2.558329 | 1.105354  |
| Mg8  | -1.463108 | 0.251707  | 0.034157  |
| Mg9  | 1.170838  | 3.764018  | -1.652700 |
| Mg10 | -0.499145 | 1.473527  | -2.663543 |
| Mg11 | 1.675623  | -3.480970 | -0.297251 |
| Mg12 | -2.508981 | -1.087542 | -2.543784 |
| Mg13 | -3.678197 | -3.013522 | -0.202959 |
| Mg14 | 4.881231  | 0.361123  | -0.747356 |
| Mg15 | 0.887903  | 2.559333  | 1.094348  |
| Mg16 | 1.741464  | -1.850182 | 2.628968  |
| Mg17 | -1.750178 | 1.869641  | 2.618123  |
| Mg18 | -1.165593 | -3.773267 | -1.634598 |
| Mg19 | -1.052721 | -1.006682 | 3.607079  |
| Mg20 | 1.461316  | -0.253435 | 0.030900  |
| Mg21 | -3.669743 | -0.700841 | 2.011382  |
| Mg22 | -1.673398 | 3.479194  | -0.317067 |
| Mg23 | 3.487596  | -1.889944 | -2.107537 |
| Mg24 | 1.042245  | 1.029029  | 3.608739  |
| Mg25 | -4.879833 | -0.364979 | -0.757630 |
| Mg26 | 2.519309  | 1.073996  | -2.546900 |

@mg26-isomer03 bp86/6-31G(d) Etot=-5202.495232 Eb=-16.49

|      |           |           |           |
|------|-----------|-----------|-----------|
| Mg1  | 2.171712  | -2.011975 | -2.166936 |
| Mg2  | 3.217954  | -3.344225 | 0.574360  |
| Mg3  | -2.897272 | 2.997315  | 1.794195  |
| Mg4  | 0.006341  | 3.034124  | 1.008366  |
| Mg5  | -2.588272 | -3.646444 | -0.398834 |
| Mg6  | 2.689258  | 3.610527  | -0.253935 |
| Mg7  | 3.259106  | 1.102057  | -2.233400 |
| Mg8  | -2.174883 | 0.975060  | -2.854777 |
| Mg9  | -2.329607 | 3.440077  | -1.025425 |
| Mg10 | -0.673331 | 0.853988  | 2.956630  |
| Mg11 | 0.728145  | 0.134463  | -3.903707 |
| Mg12 | 1.491408  | -0.013588 | 0.078633  |
| Mg13 | -3.874564 | -1.381242 | -2.003579 |
| Mg14 | -1.497816 | 0.099233  | 0.015257  |
| Mg15 | -0.870035 | -1.861485 | -2.350068 |
| Mg16 | 2.309622  | 1.513807  | 2.615430  |
| Mg17 | 1.232246  | -1.628957 | 2.786739  |
| Mg18 | 0.278243  | -3.049844 | 0.214349  |
| Mg19 | -4.399461 | 1.271823  | -0.441522 |
| Mg20 | -3.619743 | 0.283260  | 2.443090  |
| Mg21 | 4.111714  | -0.924488 | 2.137888  |
| Mg22 | -4.603702 | -1.896751 | 0.838250  |
| Mg23 | 0.370702  | 2.210600  | -1.839727 |
| Mg24 | 4.631353  | 1.542493  | 0.534012  |
| Mg25 | 4.780901  | -1.200497 | -0.836404 |
| Mg26 | -1.750020 | -2.109328 | 2.311114  |

@mg26-isomer04 bp86/6-31G(d) Etot=-5202.495114 Eb=-16.48

|     |           |           |           |
|-----|-----------|-----------|-----------|
| Mg1 | 2.290557  | -3.586263 | -0.648899 |
| Mg2 | 0.705785  | 1.591100  | -3.389471 |
| Mg3 | 1.699927  | -1.240126 | -2.913806 |
| Mg4 | 1.456743  | -0.150604 | 0.036642  |
| Mg5 | -4.974481 | -0.373134 | 0.681758  |
| Mg6 | 3.450680  | 1.326165  | -1.858904 |
| Mg7 | 0.419290  | -2.398115 | 1.822538  |
| Mg8 | -0.461389 | 0.467754  | 2.891504  |

|      |           |           |           |
|------|-----------|-----------|-----------|
| Mg9  | -4.164864 | 0.495426  | -2.067785 |
| Mg10 | 1.641118  | 2.531062  | 2.215301  |
| Mg11 | -3.364937 | 1.236618  | 2.568720  |
| Mg12 | -3.418738 | -2.297062 | -1.019322 |
| Mg13 | 0.911665  | 2.842456  | -0.695271 |
| Mg14 | -4.100126 | 2.667817  | 0.043245  |
| Mg15 | -1.310277 | 3.048614  | 1.332143  |
| Mg16 | 2.407053  | -0.232353 | 3.104096  |
| Mg17 | -1.856510 | 2.536409  | -1.995276 |
| Mg18 | 3.839537  | 3.631528  | 0.329359  |
| Mg19 | -1.527294 | 0.152880  | -0.042974 |
| Mg20 | -0.397440 | -2.581346 | -1.233750 |
| Mg21 | -1.821858 | -4.351779 | 0.658943  |
| Mg22 | -1.374777 | -0.507774 | -3.076546 |
| Mg23 | 3.791830  | -2.271697 | 1.513450  |
| Mg24 | 4.397435  | 0.735541  | 0.999587  |
| Mg25 | -2.600225 | -1.770832 | 2.123936  |
| Mg26 | 4.361295  | -1.502284 | -1.379219 |

@mg26-isomer05 bp86/6-31G(d) Etot=-5202.494940 Eb=-16.48

|      |           |           |           |
|------|-----------|-----------|-----------|
| Mg1  | -4.811457 | 0.765655  | -0.467637 |
| Mg2  | -3.273044 | 3.262944  | -0.629577 |
| Mg3  | 1.293310  | -0.534045 | 3.087147  |
| Mg4  | -0.339110 | 3.143683  | 0.531079  |
| Mg5  | -1.761845 | -0.601455 | 3.391683  |
| Mg6  | -1.473484 | 0.300326  | 0.127724  |
| Mg7  | -3.921953 | -1.816184 | -1.693222 |
| Mg8  | -2.489386 | -3.963888 | -0.152756 |
| Mg9  | -0.420289 | -2.321642 | 1.348595  |
| Mg10 | -3.360505 | 1.706654  | 2.050160  |
| Mg11 | 0.699575  | -4.312398 | -0.576978 |
| Mg12 | -3.813760 | -1.545555 | 1.391295  |
| Mg13 | 4.630978  | 1.912472  | -0.050225 |
| Mg14 | -0.384894 | 1.972140  | 3.255603  |
| Mg15 | 2.343601  | 2.313573  | 1.925841  |
| Mg16 | 2.206674  | -2.143918 | -2.181684 |
| Mg17 | 4.136421  | -0.187534 | 2.077653  |
| Mg18 | -0.822025 | 3.182097  | -2.431317 |
| Mg19 | 2.682830  | -2.754115 | 1.069146  |
| Mg20 | -0.867550 | -1.975999 | -1.998753 |
| Mg21 | 1.509650  | 0.001378  | 0.010034  |
| Mg22 | 4.729364  | -1.285363 | -0.637669 |
| Mg23 | 3.522563  | 0.623159  | -2.536555 |
| Mg24 | 0.521164  | 0.590950  | -2.896560 |
| Mg25 | 2.072288  | 2.950705  | -1.334613 |
| Mg26 | -2.609115 | 0.716360  | -2.678411 |

@mg26-isomer06 bp86/6-31G(d) Etot=-5202.494594 Eb=-16.47

|      |           |           |           |
|------|-----------|-----------|-----------|
| Mg1  | 2.339874  | -1.854911 | 2.290188  |
| Mg2  | -4.139238 | -1.393552 | -0.734581 |
| Mg3  | -4.643024 | 1.373865  | 0.629602  |
| Mg4  | -0.288957 | 3.650361  | 1.960942  |
| Mg5  | 3.883242  | -0.862490 | -2.441471 |
| Mg6  | -0.721049 | -2.554812 | -1.006997 |
| Mg7  | 0.864320  | 1.020412  | 2.756169  |
| Mg8  | 4.643362  | -1.483354 | 0.346794  |
| Mg9  | -4.113803 | -0.996613 | 2.275426  |
| Mg10 | 2.277303  | 1.555262  | -3.011360 |
| Mg11 | 0.738743  | -1.078824 | -3.139144 |
| Mg12 | -0.757861 | -1.355221 | 2.309539  |
| Mg13 | 4.218458  | 1.458233  | -0.592482 |
| Mg14 | 0.635822  | 2.722643  | -0.687639 |
| Mg15 | 1.482973  | -0.113244 | -0.114798 |
| Mg16 | -2.313899 | -1.058796 | -3.224013 |



|      |           |           |           |
|------|-----------|-----------|-----------|
| Mg17 | 4.150450  | 0.629628  | 2.326141  |
| Mg18 | 2.760098  | 3.085222  | 1.537063  |
| Mg19 | -1.455181 | 0.232782  | -0.215345 |
| Mg20 | -2.380330 | 3.075771  | -0.290928 |
| Mg21 | 0.318305  | -3.966605 | 1.389456  |
| Mg22 | -0.806018 | 1.596432  | -3.043042 |
| Mg23 | -2.267192 | 1.444495  | 2.546390  |
| Mg24 | -2.770144 | -3.373651 | 1.188900  |
| Mg25 | 2.294232  | -2.951772 | -0.802593 |
| Mg26 | -3.950487 | 1.198739  | -2.252217 |

@mg26-isomer07 bp86/6-31G(d) Etot=-5202.494297 Eb=-16.46

|      |           |           |           |
|------|-----------|-----------|-----------|
| Mg1  | -3.224490 | 2.025895  | -2.291001 |
| Mg2  | -1.396561 | -0.989842 | 3.296132  |
| Mg3  | 1.338756  | -1.737006 | 2.431989  |
| Mg4  | 1.088195  | 2.544068  | 1.386654  |
| Mg5  | -3.780638 | -2.644336 | -0.134124 |
| Mg6  | 3.534691  | -2.000932 | -2.038689 |
| Mg7  | 4.953708  | 0.119460  | -0.507758 |
| Mg8  | 3.502973  | 0.514178  | 2.233262  |
| Mg9  | 3.975983  | -2.321173 | 1.036288  |
| Mg10 | -1.760117 | 1.939297  | 2.457803  |
| Mg11 | 1.471086  | 3.648671  | -1.515564 |
| Mg12 | -2.466264 | -0.925651 | -2.643955 |
| Mg13 | -1.361148 | -3.609112 | -1.643756 |
| Mg14 | -1.179250 | -3.191801 | 1.287024  |
| Mg15 | 0.545473  | -1.514858 | -2.702803 |
| Mg16 | 1.622815  | -0.032784 | -0.165036 |
| Mg17 | -1.302931 | 3.257019  | -0.359626 |
| Mg18 | 1.414725  | -3.292148 | -0.305405 |
| Mg19 | 2.845619  | 1.031358  | -2.650422 |
| Mg20 | -4.096191 | 2.494366  | 0.592462  |
| Mg21 | 3.877073  | 2.786962  | -0.036608 |
| Mg22 | -1.317947 | -0.167198 | 0.137544  |
| Mg23 | 0.836326  | 0.938683  | 3.850995  |
| Mg24 | -4.879129 | -0.050991 | -1.008426 |
| Mg25 | -0.222413 | 1.433476  | -2.619350 |
| Mg26 | -4.020345 | -0.255603 | 1.912370  |

@mg26-isomer08 bp86/6-31G(d) Etot=-5202.493628 Eb=-16.45

|      |           |           |           |
|------|-----------|-----------|-----------|
| Mg1  | 2.466187  | -3.305995 | -1.393309 |
| Mg2  | 4.633271  | 0.395213  | 1.351910  |
| Mg3  | 2.179276  | -0.739298 | 2.873891  |
| Mg4  | 0.774661  | -2.942279 | 1.134326  |
| Mg5  | 1.086589  | -1.126288 | -2.859299 |
| Mg6  | 0.129984  | 1.361392  | 3.636916  |
| Mg7  | -2.371122 | 3.697833  | -1.349764 |
| Mg8  | -4.212283 | 2.394694  | 0.723920  |
| Mg9  | 3.872063  | -2.508219 | 1.025581  |
| Mg10 | 1.184934  | 3.637666  | -1.049284 |
| Mg11 | -0.698113 | -3.175835 | -1.496883 |
| Mg12 | -3.793628 | 0.830686  | -1.776612 |
| Mg13 | -0.593875 | 1.422386  | -2.263831 |
| Mg14 | -1.498579 | -0.516550 | 0.104640  |
| Mg15 | 2.313227  | 2.387594  | 1.821374  |
| Mg16 | -2.735718 | 0.963038  | 2.823298  |
| Mg17 | -2.585084 | -3.249236 | 1.210472  |
| Mg18 | 4.075932  | 2.491439  | -0.677314 |
| Mg19 | -0.733190 | 2.386827  | 0.955761  |
| Mg20 | 4.033669  | -0.653231 | -1.527091 |
| Mg21 | 1.403110  | 0.115061  | -0.018941 |
| Mg22 | -0.843387 | -1.348517 | 3.058608  |
| Mg23 | -4.576293 | -0.696073 | 1.066690  |
| Mg24 | 2.363961  | 1.583772  | -2.878591 |

|      |           |           |           |
|------|-----------|-----------|-----------|
| Mg25 | -1.950993 | -1.080652 | -3.181944 |
| Mg26 | -3.924599 | -2.325430 | -1.314525 |

@mg26-isomer09 bp86/6-31G(d) Etot=-5202.493421 Eb=-16.44

|      |           |           |           |
|------|-----------|-----------|-----------|
| Mg1  | 5.234660  | -0.132366 | 0.211470  |
| Mg2  | -4.177522 | -1.114491 | -1.140073 |
| Mg3  | 3.914395  | 0.071809  | 2.814268  |
| Mg4  | 3.543519  | 2.302951  | 0.484446  |
| Mg5  | 3.201020  | -2.298840 | 0.925034  |
| Mg6  | -1.205007 | -2.136431 | -2.214174 |
| Mg7  | -2.671919 | -3.564191 | 0.034885  |
| Mg8  | 1.768468  | -2.208859 | -2.162585 |
| Mg9  | -2.714515 | 3.301454  | 0.876959  |
| Mg10 | 0.273806  | 2.847500  | 0.665015  |
| Mg11 | -1.161960 | 1.244886  | 2.816860  |
| Mg12 | 1.703270  | 1.989163  | 3.166443  |
| Mg13 | 1.754484  | 2.820880  | -2.012289 |
| Mg14 | -4.249607 | 1.931708  | -1.243215 |
| Mg15 | -1.467194 | 0.167423  | -0.119705 |
| Mg16 | 3.578833  | 0.508425  | -2.269485 |
| Mg17 | 0.141028  | -2.753253 | 0.511605  |
| Mg18 | -4.027687 | 0.647449  | 1.593214  |
| Mg19 | 4.733189  | -2.306739 | -1.763517 |
| Mg20 | -4.858099 | -2.254424 | 1.604317  |
| Mg21 | 1.451276  | 0.043500  | 0.016439  |
| Mg22 | -2.744415 | 0.432301  | -3.274303 |
| Mg23 | -1.949716 | -1.690778 | 2.492541  |
| Mg24 | 0.316077  | 0.371694  | -3.036756 |
| Mg25 | -1.310136 | 2.812606  | -1.928911 |
| Mg26 | 0.923752  | -1.033380 | 2.951518  |

@mg26-isomer10 bp86/6-31G(d) Etot=-5202.492291 Eb=-16.42

|      |           |           |           |
|------|-----------|-----------|-----------|
| Mg1  | -3.871707 | -1.593410 | -1.549102 |
| Mg2  | 4.406424  | -0.098258 | 1.752753  |
| Mg3  | 1.614798  | -0.861720 | 2.964147  |
| Mg4  | -4.871513 | 1.122345  | -0.269263 |
| Mg5  | 1.415294  | 0.200952  | -0.011127 |
| Mg6  | -0.431585 | 2.670240  | 0.935099  |
| Mg7  | -2.994590 | 1.462126  | 2.120214  |
| Mg8  | -3.055414 | 1.201233  | -2.642356 |
| Mg9  | -0.219385 | 1.405665  | 3.636122  |
| Mg10 | -3.071112 | 3.498015  | -0.544618 |
| Mg11 | -0.974756 | -2.709358 | -1.864889 |
| Mg12 | -4.329813 | -1.250595 | 1.573113  |
| Mg13 | 4.488534  | 2.184420  | -0.244103 |
| Mg14 | 1.953711  | -1.871456 | -2.256665 |
| Mg15 | -1.529819 | -1.199886 | 2.907077  |
| Mg16 | 2.402663  | 2.162705  | 2.162786  |
| Mg17 | -0.295380 | -0.028792 | -3.073408 |
| Mg18 | -2.670004 | -3.505639 | 0.570881  |
| Mg19 | -1.561225 | -0.068340 | -0.139182 |
| Mg20 | 1.513583  | -4.544815 | -0.847798 |
| Mg21 | 4.491550  | -0.615771 | -1.306035 |
| Mg22 | 2.505442  | 1.349487  | -2.653432 |
| Mg23 | 0.213687  | -2.563901 | 0.944188  |
| Mg24 | 2.018207  | 3.594784  | -0.634155 |
| Mg25 | -0.456093 | 2.726102  | -2.148210 |
| Mg26 | 3.308502  | -2.666133 | 0.617964  |

@mg26-isomer11 bp86/6-31G(d) Etot=-5202.492036 Eb=-16.41

|     |           |           |           |
|-----|-----------|-----------|-----------|
| Mg1 | -1.061603 | 3.581705  | -0.180260 |
| Mg2 | -2.424092 | -2.541949 | 2.262999  |
| Mg3 | 3.952404  | 1.624833  | 1.754892  |
| Mg4 | -2.244784 | -1.626945 | -2.443540 |

|      |           |           |           |
|------|-----------|-----------|-----------|
| Mg5  | 3.953894  | -1.644843 | 1.744183  |
| Mg6  | 2.436817  | -3.695666 | 0.026038  |
| Mg7  | -1.115615 | -0.015381 | 3.154763  |
| Mg8  | -1.213935 | -0.001662 | 0.030550  |
| Mg9  | -4.018773 | -0.008299 | 1.631858  |
| Mg10 | 2.707972  | 0.015584  | -3.153956 |
| Mg11 | 1.978586  | -0.015304 | 3.358173  |
| Mg12 | 0.581035  | -2.255597 | 1.981356  |
| Mg13 | 2.436591  | 3.700230  | 0.059850  |
| Mg14 | 0.777594  | 1.973936  | -1.925059 |
| Mg15 | -4.650037 | 0.005453  | -1.406393 |
| Mg16 | -2.421845 | 2.520949  | 2.283435  |
| Mg17 | 0.778743  | -1.958270 | -1.952266 |
| Mg18 | 4.327589  | 1.610219  | -1.209552 |
| Mg19 | 4.331466  | -1.592751 | -1.220016 |
| Mg20 | -1.059212 | -3.573302 | -0.211396 |
| Mg21 | -2.244567 | 1.649967  | -2.426297 |
| Mg22 | -0.184254 | 0.019995  | -3.966798 |
| Mg23 | -4.013875 | -2.637403 | -0.177228 |
| Mg24 | -4.014649 | 2.638627  | -0.153547 |
| Mg25 | 1.823244  | -0.006173 | 0.146724  |
| Mg26 | 0.581304  | 2.232050  | 1.991488  |

@mg26-isomer12 bp86/6-31G(d) Etot=-5202.490941 Eb=-16.38

|      |           |           |           |
|------|-----------|-----------|-----------|
| Mg1  | -1.490169 | -0.471073 | -0.106063 |
| Mg2  | -0.489209 | 2.268484  | -0.766239 |
| Mg3  | -0.967156 | -1.551949 | 2.768693  |
| Mg4  | 4.214595  | -1.807398 | 1.247254  |
| Mg5  | -3.995952 | -1.915696 | -1.224789 |
| Mg6  | 4.595990  | 2.565387  | -0.452793 |
| Mg7  | -0.417200 | 1.427429  | -3.610992 |
| Mg8  | -4.934702 | 0.650779  | 0.205581  |
| Mg9  | -1.055211 | 3.877594  | 1.728463  |
| Mg10 | 1.180753  | -3.361610 | 1.354733  |
| Mg11 | -2.147461 | -3.588015 | 0.631204  |
| Mg12 | 0.364315  | 1.325316  | 2.475634  |
| Mg13 | 4.277780  | -0.265537 | -1.428300 |
| Mg14 | -3.926820 | -1.605841 | 1.887797  |
| Mg15 | 1.472708  | -0.286249 | 0.035192  |
| Mg16 | 1.455295  | -0.906096 | -2.977472 |
| Mg17 | -3.226724 | 1.131559  | -2.198952 |
| Mg18 | 2.246479  | 1.978012  | -2.234529 |
| Mg19 | 0.017110  | -3.004377 | -1.351639 |
| Mg20 | -3.490180 | 3.279827  | 0.133787  |
| Mg21 | -1.596264 | -1.275287 | -3.165031 |
| Mg22 | 3.038109  | -3.057221 | -1.092818 |
| Mg23 | 3.612075  | 1.119435  | 1.954994  |
| Mg24 | 1.976226  | -1.119236 | 3.159803  |
| Mg25 | -2.644415 | 1.181836  | 2.273455  |
| Mg26 | 1.930028  | 3.409927  | 0.753027  |

@mg26-isomer13 bp86/6-31G(d) Etot=-5202.490324 Eb=-16.37

|      |           |           |           |
|------|-----------|-----------|-----------|
| Mg1  | -3.094159 | -1.223184 | -2.259427 |
| Mg2  | -4.500120 | 1.235642  | -1.152777 |
| Mg3  | -2.377873 | 1.592255  | -3.235379 |
| Mg4  | -0.268814 | 2.834821  | 1.112714  |
| Mg5  | -1.408179 | 0.118026  | -0.063118 |
| Mg6  | 1.431722  | -1.560260 | 2.705382  |
| Mg7  | 4.859814  | -0.920191 | -1.032730 |
| Mg8  | 2.516359  | 3.631867  | -0.095219 |
| Mg9  | 2.202276  | 1.624374  | 2.565722  |
| Mg10 | 4.276313  | -0.642635 | 2.057551  |
| Mg11 | 3.295212  | -2.992324 | 0.571511  |
| Mg12 | -1.614966 | -2.145312 | 2.338697  |

|      |           |           |           |
|------|-----------|-----------|-----------|
| Mg13 | -2.665869 | -3.478342 | -0.327547 |
| Mg14 | 0.009292  | -0.267325 | -2.755829 |
| Mg15 | -2.506071 | 3.453279  | -0.832634 |
| Mg16 | 1.556079  | 0.154981  | -0.010834 |
| Mg17 | -0.645721 | -3.138282 | -2.698753 |
| Mg18 | 4.716881  | 1.795534  | 0.363251  |
| Mg19 | -0.701720 | 0.671175  | 3.087324  |
| Mg20 | 0.306033  | -2.783572 | 0.077631  |
| Mg21 | -3.332161 | 1.845127  | 1.639921  |
| Mg22 | -4.271190 | -1.153836 | 0.740959  |
| Mg23 | -3.628683 | -0.328744 | 3.631793  |
| Mg24 | 2.377459  | -2.124927 | -2.272268 |
| Mg25 | 0.250599  | 2.548172  | -1.860172 |
| Mg26 | 3.217485  | 1.253681  | -2.295768 |

@mg26-isomer14 bp86/6-31G(d) Etot=-5202.489687 Eb=-16.35

|      |           |           |           |
|------|-----------|-----------|-----------|
| Mg1  | 2.673479  | 2.378308  | 1.604198  |
| Mg2  | 0.180968  | 3.346681  | -0.103213 |
| Mg3  | 1.878539  | -2.750107 | -1.648340 |
| Mg4  | 0.368210  | -0.993083 | -3.661243 |
| Mg5  | -1.133843 | -2.106229 | -1.370443 |
| Mg6  | -0.903437 | -1.863905 | 1.919437  |
| Mg7  | 4.837464  | 1.222855  | -0.283353 |
| Mg8  | -0.213330 | 2.733105  | 2.715724  |
| Mg9  | -4.627792 | 1.291031  | -0.843117 |
| Mg10 | 4.041691  | -0.280239 | 2.201764  |
| Mg11 | -4.162461 | -1.655311 | -1.337791 |
| Mg12 | -1.449608 | 0.591825  | 0.109276  |
| Mg13 | 1.393128  | -0.090543 | -0.011139 |
| Mg14 | 4.426015  | -1.817327 | -0.420375 |
| Mg15 | -2.476051 | 3.127557  | -1.595709 |
| Mg16 | -3.051859 | -3.638472 | 0.679427  |
| Mg17 | -2.432166 | 0.297734  | -2.908223 |
| Mg18 | 2.879808  | 2.958511  | -1.547493 |
| Mg19 | 1.154567  | 0.022427  | 3.099454  |
| Mg20 | -1.937811 | 0.484098  | 3.362489  |
| Mg21 | -3.195418 | 2.648231  | 1.450103  |
| Mg22 | 0.288373  | 1.691180  | -2.578560 |
| Mg23 | 3.074571  | 0.025400  | -2.552562 |
| Mg24 | -4.063279 | -0.702507 | 1.566301  |
| Mg25 | 0.144735  | -4.240678 | 0.445166  |
| Mg26 | 2.305508  | -2.680541 | 1.708222  |

@mg26-isomer15 bp86/6-31G(d) Etot=-5202.489446 Eb=-16.35

|      |           |           |           |
|------|-----------|-----------|-----------|
| Mg1  | 0.732066  | 0.193927  | 2.923163  |
| Mg2  | 2.373157  | -2.355171 | -2.374218 |
| Mg3  | -3.878512 | -2.026514 | -1.520508 |
| Mg4  | -0.808153 | -2.470442 | -2.474359 |
| Mg5  | 4.710624  | 1.711655  | 0.000032  |
| Mg6  | -0.597037 | 2.915632  | 2.898961  |
| Mg7  | -0.807862 | -2.471133 | 2.473739  |
| Mg8  | -1.222561 | -0.693555 | -0.000057 |
| Mg9  | 4.359487  | -1.724418 | -0.000461 |
| Mg10 | 3.858206  | 0.195076  | -2.356686 |
| Mg11 | -3.878377 | -2.026927 | 1.520298  |
| Mg12 | -4.354691 | 0.587554  | 0.000266  |
| Mg13 | -3.335727 | 3.032767  | 1.524444  |
| Mg14 | 2.249130  | 2.676058  | -1.678656 |
| Mg15 | -2.322692 | 0.369626  | 2.619162  |
| Mg16 | 0.852413  | -3.257363 | -0.000481 |
| Mg17 | 2.249340  | 2.675440  | 1.679269  |
| Mg18 | -0.597424 | 2.916597  | -2.898138 |
| Mg19 | 2.373553  | -2.356025 | 2.373369  |
| Mg20 | -3.336101 | 3.033258  | -1.523576 |

|      |           |           |           |
|------|-----------|-----------|-----------|
| Mg21 | -0.490470 | 2.233881  | 0.000289  |
| Mg22 | 0.731661  | 0.194882  | -2.922996 |
| Mg23 | 3.858570  | 0.194282  | 2.356444  |
| Mg24 | -2.134815 | -3.855448 | -0.000423 |
| Mg25 | 1.739245  | -0.064027 | -0.000014 |
| Mg26 | -2.323031 | 0.370391  | -2.618865 |

@mg26-isomer16 bp86/6-31G(d) Etot=-5202.488516 Eb=-16.32

|      |           |           |           |
|------|-----------|-----------|-----------|
| Mg1  | 1.310099  | -0.051112 | -0.064627 |
| Mg2  | 2.196898  | 2.291346  | -2.008129 |
| Mg3  | -1.666909 | 0.056092  | 0.073090  |
| Mg4  | 2.452445  | -3.494391 | 1.134568  |
| Mg5  | 4.345604  | -2.306209 | -0.821535 |
| Mg6  | -2.173817 | 3.089806  | 0.996016  |
| Mg7  | 0.847695  | 3.290472  | 0.640743  |
| Mg8  | -1.691248 | -1.329660 | 3.230262  |
| Mg9  | -3.629546 | 0.934119  | 2.444919  |
| Mg10 | 3.838077  | 3.686271  | 0.232888  |
| Mg11 | 0.285845  | -0.101326 | -3.251865 |
| Mg12 | -3.471967 | -2.208068 | 0.854062  |
| Mg13 | 2.828478  | 1.512474  | 2.238312  |
| Mg14 | 1.278259  | -1.255181 | 2.933310  |
| Mg15 | 4.195528  | -1.183951 | 1.958788  |
| Mg16 | -0.376806 | -2.715719 | 0.766051  |
| Mg17 | 1.334066  | -2.690405 | -1.796360 |
| Mg18 | -4.498140 | -1.157496 | -1.772009 |
| Mg19 | -1.625396 | -2.197570 | -2.126121 |
| Mg20 | -0.252830 | 1.328661  | 2.668782  |
| Mg21 | -0.760636 | 2.286830  | -1.740529 |
| Mg22 | 3.286854  | -0.495310 | -2.858460 |
| Mg23 | -4.062296 | 1.699172  | -0.838606 |
| Mg24 | 4.390767  | 0.784865  | -0.357345 |
| Mg25 | -5.703893 | -0.280306 | 0.844297  |
| Mg26 | -2.677129 | 0.506598  | -3.380502 |

@mg26-isomer17 bp86/6-31G(d) Etot=-5202.488305 Eb=-16.32

|      |           |           |           |
|------|-----------|-----------|-----------|
| Mg1  | -0.692496 | -1.045133 | 3.643102  |
| Mg2  | 1.537959  | 0.139384  | -0.032528 |
| Mg3  | 1.499834  | 3.311938  | 0.159150  |
| Mg4  | -1.309993 | -1.969854 | -1.975089 |
| Mg5  | -4.501803 | 1.008725  | 0.490882  |
| Mg6  | -1.451263 | 0.180901  | 0.170469  |
| Mg7  | -1.659824 | 3.292170  | 0.957647  |
| Mg8  | -3.751405 | 3.447554  | -1.132434 |
| Mg9  | -3.319583 | -1.756215 | 1.973536  |
| Mg10 | 2.239804  | 1.715707  | -2.586202 |
| Mg11 | -2.435711 | -3.958513 | 0.088424  |
| Mg12 | 1.643710  | -1.692598 | -2.496333 |
| Mg13 | -0.301189 | 0.315981  | -3.588499 |
| Mg14 | 0.018085  | -2.307090 | 1.064561  |
| Mg15 | -3.178778 | 0.687535  | -2.378091 |
| Mg16 | -4.225206 | -1.752966 | -0.936851 |
| Mg17 | 4.333398  | -0.501533 | -1.752570 |
| Mg18 | -0.744724 | 2.577305  | -1.846945 |
| Mg19 | 3.320745  | 1.888792  | 2.215199  |
| Mg20 | 0.730805  | -4.285377 | -0.988642 |
| Mg21 | 2.225588  | -0.955099 | 2.791708  |
| Mg22 | -2.646837 | 1.101462  | 2.854156  |
| Mg23 | 4.805400  | -0.488929 | 1.178651  |
| Mg24 | 0.334664  | 1.617832  | 2.565678  |
| Mg25 | 4.366631  | 2.248967  | -0.512750 |
| Mg26 | 3.162189  | -2.820947 | 0.073771  |

@mg26-isomer18 bp86/6-31G(d) Etot=-5202.487735 Eb=-16.31

|      |           |           |           |
|------|-----------|-----------|-----------|
| Mg1  | -0.469559 | 2.773683  | -2.552147 |
| Mg2  | -2.455551 | 0.591633  | -2.799444 |
| Mg3  | -4.744884 | 1.233719  | -0.751764 |
| Mg4  | -3.831550 | 2.134624  | 1.977414  |
| Mg5  | 4.462912  | -1.773022 | -0.165262 |
| Mg6  | 0.965185  | -0.980014 | 3.575495  |
| Mg7  | 3.154802  | 2.898521  | 1.255560  |
| Mg8  | -2.985501 | -3.795328 | -0.023556 |
| Mg9  | -4.186121 | -1.578302 | -1.613622 |
| Mg10 | 4.939704  | 1.246011  | -0.319495 |
| Mg11 | 0.714707  | 0.078969  | -3.086089 |
| Mg12 | 2.105331  | -2.741731 | 1.366426  |
| Mg13 | -3.905435 | -1.051818 | 1.429096  |
| Mg14 | 0.803798  | 1.856531  | 2.873014  |
| Mg15 | 1.390757  | 0.017588  | 0.054057  |
| Mg16 | 0.101889  | -4.345384 | -0.221211 |
| Mg17 | 1.977110  | -2.620763 | -1.809171 |
| Mg18 | -1.750509 | 0.386701  | 3.274272  |
| Mg19 | 0.257939  | 3.250349  | 0.294125  |
| Mg20 | -1.048231 | -1.912231 | -1.716759 |
| Mg21 | 3.549691  | 0.016539  | 2.203102  |
| Mg22 | -0.886988 | -1.995934 | 1.498174  |
| Mg23 | -1.509008 | 0.693195  | 0.146583  |
| Mg24 | -2.770043 | 3.502813  | -0.544342 |
| Mg25 | 3.659983  | -0.266192 | -2.578957 |
| Mg26 | 2.459569  | 2.379842  | -1.765499 |

@mg26-isomer19 bp86/6-31G(d) Etot=-5202.487656 Eb=-16.30

|      |           |           |           |
|------|-----------|-----------|-----------|
| Mg1  | -0.000969 | 3.521279  | -1.695686 |
| Mg2  | 2.117188  | 3.253643  | 0.840192  |
| Mg3  | 0.436626  | 0.703137  | -2.700184 |
| Mg4  | 4.607829  | -1.395247 | 0.617123  |
| Mg5  | -2.211360 | 0.429809  | 2.856354  |
| Mg6  | 1.469756  | 0.306497  | 0.112884  |
| Mg7  | 0.587840  | 1.672347  | 3.083481  |
| Mg8  | -3.229095 | -3.300852 | -0.531279 |
| Mg9  | -3.151748 | 4.228968  | -0.511612 |
| Mg10 | -1.510432 | -2.610458 | 2.029516  |
| Mg11 | -1.028227 | 2.455757  | 0.835413  |
| Mg12 | 1.635924  | -2.303653 | 1.559658  |
| Mg13 | 0.293877  | -1.069221 | 3.928496  |
| Mg14 | -4.315074 | -1.339361 | 1.498064  |
| Mg15 | -4.161012 | 1.542207  | 0.586075  |
| Mg16 | 1.204495  | -2.153044 | -3.094049 |
| Mg17 | 3.589822  | -0.424460 | -2.073842 |
| Mg18 | 3.023366  | -3.302435 | -1.009605 |
| Mg19 | 2.884281  | 2.489865  | -1.977330 |
| Mg20 | -1.353664 | -0.449247 | -0.057750 |
| Mg21 | -0.098926 | -3.389688 | -0.710840 |
| Mg22 | 3.214356  | 0.329329  | 2.622055  |
| Mg23 | 4.644648  | 1.611656  | 0.241512  |
| Mg24 | -2.472059 | 1.593295  | -2.115971 |
| Mg25 | -4.388728 | -0.693996 | -1.513094 |
| Mg26 | -1.788713 | -1.706126 | -2.819581 |

@mg26-isomer20 bp86/6-31G(d) Etot=-5202.487270 Eb=-16.29

|     |           |           |           |
|-----|-----------|-----------|-----------|
| Mg1 | -4.317546 | -0.287405 | 0.090884  |
| Mg2 | -2.711895 | -2.322598 | 1.929467  |
| Mg3 | -1.272629 | 2.048319  | -0.218708 |
| Mg4 | 1.820281  | -2.782356 | -0.489331 |
| Mg5 | -1.071642 | -0.847738 | -0.165645 |
| Mg6 | 0.334959  | 0.502305  | -2.680192 |
| Mg7 | -0.344948 | -2.414839 | -2.686294 |
| Mg8 | -1.109537 | 0.571150  | 2.691118  |

|      |           |           |           |
|------|-----------|-----------|-----------|
| Mg9  | 4.918159  | 0.581907  | 1.401294  |
| Mg10 | -3.582220 | 2.307479  | 1.590072  |
| Mg11 | -4.090114 | 2.327917  | -1.515533 |
| Mg12 | -1.516389 | 2.794280  | -3.130249 |
| Mg13 | 0.386749  | -2.037497 | 2.227975  |
| Mg14 | 3.447686  | 2.997845  | 0.900736  |
| Mg15 | 4.646865  | -1.590683 | -0.702377 |
| Mg16 | 4.006435  | 1.255020  | -1.573502 |
| Mg17 | 2.819300  | -1.244939 | -3.023171 |
| Mg18 | -3.417384 | -2.841940 | -1.192537 |
| Mg19 | 3.478210  | -1.896258 | 2.049667  |
| Mg20 | 1.635866  | 0.296384  | 0.176564  |
| Mg21 | 1.235851  | 3.070219  | -1.299105 |
| Mg22 | -0.871659 | -3.941875 | 0.028681  |
| Mg23 | -4.184480 | -0.081706 | 3.204833  |
| Mg24 | 2.039228  | 0.676364  | 3.128062  |
| Mg25 | -2.736227 | -0.151579 | -2.664340 |
| Mg26 | 0.457080  | 3.012226  | 1.921633  |

@mg26-isomer21 bp86/6-31G(d) Etot=-5202.486776 Eb=-16.28

|      |           |           |           |
|------|-----------|-----------|-----------|
| Mg1  | 4.073943  | 0.199000  | 1.607468  |
| Mg2  | -0.680995 | -2.265364 | -1.820777 |
| Mg3  | -0.948970 | 2.606694  | 2.495986  |
| Mg4  | -2.214541 | -0.120896 | -3.331160 |
| Mg5  | -4.174164 | 1.383965  | -1.517472 |
| Mg6  | 2.398770  | 2.706478  | 2.477851  |
| Mg7  | 0.819834  | 0.247005  | 2.896839  |
| Mg8  | 2.354037  | -2.419313 | -2.333725 |
| Mg9  | 3.954352  | 2.763421  | -0.069421 |
| Mg10 | 0.703704  | 2.625240  | -0.032634 |
| Mg11 | -0.676732 | -2.199301 | 1.935686  |
| Mg12 | 0.846110  | 0.137159  | -2.911921 |
| Mg13 | -4.047465 | -1.565302 | 1.479337  |
| Mg14 | 1.406505  | -0.539466 | 0.006050  |
| Mg15 | -2.258104 | 0.035322  | 3.269021  |
| Mg16 | 2.380524  | -2.304793 | 2.416577  |
| Mg17 | -3.984940 | -1.671828 | -1.494501 |
| Mg18 | 1.166311  | -3.868807 | 0.089308  |
| Mg19 | -1.503792 | 0.316355  | 0.023393  |
| Mg20 | -4.247167 | 1.479449  | 1.447838  |
| Mg21 | 4.160867  | -2.470387 | 0.042502  |
| Mg22 | -2.465372 | -3.792879 | 0.102144  |
| Mg23 | -0.980809 | 2.473823  | -2.531066 |
| Mg24 | 4.038160  | 0.136435  | -1.638237 |
| Mg25 | 2.362982  | 2.645339  | -2.563485 |
| Mg26 | -2.483048 | 3.462651  | -0.045601 |

@mg26-isomer22 bp86/6-31G(d) Etot=-5202.486704 Eb=-16.28

|      |           |           |           |
|------|-----------|-----------|-----------|
| Mg1  | -1.779578 | 3.526066  | 1.423030  |
| Mg2  | 1.189801  | 0.872037  | -0.429493 |
| Mg3  | 1.530856  | -1.005419 | 3.699955  |
| Mg4  | 1.187840  | 3.613450  | 0.870929  |
| Mg5  | 4.346051  | 0.076016  | -0.567370 |
| Mg6  | 2.178821  | -1.195000 | -2.407376 |
| Mg7  | 2.968071  | 1.291517  | 2.094082  |
| Mg8  | -0.857080 | 2.920697  | -1.508119 |
| Mg9  | 3.994226  | 3.093952  | -0.174701 |
| Mg10 | -0.148531 | 1.247889  | 2.524186  |
| Mg11 | -3.664803 | -2.265498 | -1.498001 |
| Mg12 | 3.921664  | -3.032515 | -0.560276 |
| Mg13 | -1.505950 | -3.421141 | 0.235839  |
| Mg14 | -3.820441 | 2.728187  | -0.524943 |
| Mg15 | -3.286611 | 0.910333  | 2.199016  |
| Mg16 | -5.010473 | 0.056417  | -0.274033 |

|      |           |           |           |
|------|-----------|-----------|-----------|
| Mg17 | 2.882602  | 1.997024  | -2.719094 |
| Mg18 | 0.104033  | 0.836489  | -3.434921 |
| Mg19 | -2.866813 | 0.612900  | -2.589289 |
| Mg20 | -1.354424 | -1.552781 | 2.891509  |
| Mg21 | -1.556683 | -0.097995 | 0.031004  |
| Mg22 | 1.166692  | -3.963480 | -1.343295 |
| Mg23 | -4.000903 | -2.106231 | 1.566377  |
| Mg24 | 4.088694  | -1.525938 | 2.037044  |
| Mg25 | 1.077848  | -1.800834 | 0.839490  |
| Mg26 | -0.784906 | -1.816142 | -2.381551 |

@mg26-isomer23 bp86/6-31G(d) Etot=-5202.486638 Eb=-16.28

|      |           |           |           |
|------|-----------|-----------|-----------|
| Mg1  | 2.606068  | 3.375105  | 1.512345  |
| Mg2  | -1.570106 | -2.143436 | 2.406427  |
| Mg3  | 1.554981  | -2.142132 | 2.405100  |
| Mg4  | -1.573121 | -0.182022 | 0.000030  |
| Mg5  | 0.005318  | 1.543754  | -2.143165 |
| Mg6  | -2.934704 | 0.694233  | 2.634167  |
| Mg7  | 2.940942  | 0.683412  | 2.635194  |
| Mg8  | -4.527604 | -1.573945 | 1.510702  |
| Mg9  | -2.931301 | 0.692500  | -2.634867 |
| Mg10 | 1.576066  | -0.181194 | -0.000101 |
| Mg11 | 4.443756  | 1.263192  | 0.000848  |
| Mg12 | -2.591093 | 3.381981  | 1.507939  |
| Mg13 | -4.526618 | -1.572425 | -1.509412 |
| Mg14 | -0.007853 | -3.172981 | -0.000615 |
| Mg15 | 4.518779  | -1.594985 | 1.510070  |
| Mg16 | -1.572544 | -2.147902 | -2.406338 |
| Mg17 | 0.008848  | 3.769892  | 0.000700  |
| Mg18 | -2.996733 | -3.610370 | 0.001038  |
| Mg19 | 0.002876  | 1.543847  | 2.143415  |
| Mg20 | -4.434169 | 1.281241  | -0.000739 |
| Mg21 | 4.519535  | -1.595091 | -1.510972 |
| Mg22 | 2.975874  | -3.619406 | -0.001453 |
| Mg23 | 2.943466  | 0.685942  | -2.634728 |
| Mg24 | 2.606568  | 3.375494  | -1.507953 |
| Mg25 | 1.553401  | -2.137656 | -2.405308 |
| Mg26 | -2.590633 | 3.382953  | -1.512324 |

@mg26-isomer24 bp86/6-31G(d) Etot=-5202.485284 Eb=-16.25

|      |           |           |           |
|------|-----------|-----------|-----------|
| Mg1  | -4.309812 | 2.435367  | 0.521778  |
| Mg2  | -1.153702 | 0.102806  | -3.560814 |
| Mg3  | -0.308861 | -0.043276 | 2.504857  |
| Mg4  | 2.126973  | -3.793576 | -0.385087 |
| Mg5  | 1.901948  | 0.495139  | -3.121217 |
| Mg6  | 4.131224  | -2.065639 | 0.968717  |
| Mg7  | -0.169949 | 2.637377  | -2.457837 |
| Mg8  | -2.717783 | -2.071960 | -2.139947 |
| Mg9  | -1.567742 | 0.364909  | -0.417730 |
| Mg10 | 0.527548  | -2.185377 | -2.494476 |
| Mg11 | -3.253818 | 2.151205  | -2.335953 |
| Mg12 | -3.516364 | -0.086242 | 2.138428  |
| Mg13 | 2.835895  | 0.234353  | 2.423235  |
| Mg14 | 1.426729  | -2.580092 | 2.346017  |
| Mg15 | -1.949221 | 2.543132  | 2.427692  |
| Mg16 | 1.381133  | -0.221903 | -0.196847 |
| Mg17 | 3.605962  | -1.733036 | -1.988037 |
| Mg18 | 2.841026  | 2.987072  | -1.637214 |
| Mg19 | 4.480138  | 0.694542  | -0.410202 |
| Mg20 | -1.868534 | -2.575498 | 2.910481  |
| Mg21 | 1.079115  | 2.581388  | 3.273440  |
| Mg22 | -4.739647 | -0.192586 | -0.861840 |
| Mg23 | -3.898756 | -2.668614 | 0.586755  |
| Mg24 | 3.457174  | 3.006965  | 1.304660  |



|      |           |           |          |
|------|-----------|-----------|----------|
| Mg25 | 0.392840  | 2.760201  | 0.440253 |
| Mg26 | -0.733516 | -2.776658 | 0.160884 |

@mg26-isomer25 bp86/6-31G(d) Etot=-5202.485247 Eb=-16.25

|      |           |           |           |
|------|-----------|-----------|-----------|
| Mg1  | 3.612027  | -3.078419 | 0.540396  |
| Mg2  | 0.395098  | -2.662068 | -0.419889 |
| Mg3  | -2.119383 | -4.473064 | -0.114859 |
| Mg4  | -3.765036 | 2.724327  | 1.040493  |
| Mg5  | -1.643122 | 2.391366  | 3.225512  |
| Mg6  | 0.442236  | -0.765383 | -2.842916 |
| Mg7  | -0.052675 | -0.015528 | 2.617711  |
| Mg8  | -3.425053 | 0.023684  | 2.266355  |
| Mg9  | -2.215733 | 0.482279  | -3.490527 |
| Mg10 | -2.790624 | 2.814554  | -1.709215 |
| Mg11 | -2.276567 | -2.217235 | -2.163396 |
| Mg12 | -4.451935 | 0.363734  | -1.049638 |
| Mg13 | 1.712856  | 2.397342  | 2.290615  |
| Mg14 | 1.499770  | 0.302308  | -0.054633 |
| Mg15 | -4.170762 | -2.250340 | 0.333262  |
| Mg16 | 3.100422  | -2.017021 | -2.192802 |
| Mg17 | 0.182047  | 2.191121  | -2.412120 |
| Mg18 | -1.594246 | -2.461510 | 2.087828  |
| Mg19 | 3.492501  | -0.386809 | 2.195480  |
| Mg20 | 3.220843  | 1.136463  | -2.338850 |
| Mg21 | 4.348003  | 2.068435  | 0.570564  |
| Mg22 | -0.657001 | 2.946010  | 0.453269  |
| Mg23 | 5.079643  | -0.574356 | -0.503092 |
| Mg24 | 1.390579  | -2.640619 | 2.479670  |
| Mg25 | -1.449869 | -0.026031 | -0.244399 |
| Mg26 | 2.135982  | 3.726761  | -0.564818 |

@mg26-isomer26 bp86/6-31G(d) Etot=-5202.484290 Eb=-16.22

|      |           |           |           |
|------|-----------|-----------|-----------|
| Mg1  | -1.815111 | -1.225713 | -2.827287 |
| Mg2  | -2.507204 | 1.728770  | -2.321131 |
| Mg3  | -2.507162 | 1.728450  | 2.321340  |
| Mg4  | 1.710186  | 0.125802  | 0.000029  |
| Mg5  | 1.251358  | -1.544924 | 2.539413  |
| Mg6  | -1.214135 | -0.143603 | -0.000045 |
| Mg7  | 4.873348  | 0.977962  | 0.000052  |
| Mg8  | -4.450664 | -0.545769 | -1.528471 |
| Mg9  | -3.246215 | -2.891671 | -0.000083 |
| Mg10 | -0.681075 | -3.611901 | 1.427339  |
| Mg11 | -4.450692 | -0.545916 | 1.528459  |
| Mg12 | -2.021610 | 3.650553  | 0.000246  |
| Mg13 | -1.815092 | -1.226138 | 2.827035  |
| Mg14 | 0.472452  | 2.679901  | -1.483911 |
| Mg15 | 3.011741  | 1.149954  | 2.550693  |
| Mg16 | -0.681151 | -3.611575 | -1.427773 |
| Mg17 | 0.472483  | 2.679794  | 1.484302  |
| Mg18 | 4.129830  | -1.572318 | 1.540636  |
| Mg19 | 3.164678  | 3.348759  | 0.000209  |
| Mg20 | 0.151753  | 0.992483  | 3.805213  |
| Mg21 | 0.151730  | 0.993033  | -3.805163 |
| Mg22 | 1.251321  | -1.544527 | -2.539611 |
| Mg23 | 2.105933  | -3.254271 | -0.000219 |
| Mg24 | -4.498238 | 2.084701  | 0.000135  |
| Mg25 | 4.129810  | -1.572118 | -1.540853 |
| Mg26 | 3.011724  | 1.150282  | -2.550554 |

@mg26-isomer27 bp86/6-31G(d) Etot=-5202.483726 Eb=-16.21

|     |           |           |           |
|-----|-----------|-----------|-----------|
| Mg1 | -4.147405 | 0.675736  | -1.846253 |
| Mg2 | -2.192359 | -0.875172 | 3.227159  |
| Mg3 | 3.630671  | 1.164317  | 2.334438  |
| Mg4 | 0.667124  | 0.249989  | 2.933970  |

|      |           |           |           |
|------|-----------|-----------|-----------|
| Mg5  | -1.873747 | 1.839650  | 2.126083  |
| Mg6  | -2.479020 | -3.060103 | 1.086164  |
| Mg7  | -1.227384 | 4.283240  | 0.537004  |
| Mg8  | 3.583477  | -2.671155 | -0.898586 |
| Mg9  | 5.073040  | -0.338578 | 0.263086  |
| Mg10 | 2.972687  | -1.843578 | 2.073690  |
| Mg11 | 1.616611  | 0.049347  | -0.104964 |
| Mg12 | 3.785590  | 2.313543  | -0.613971 |
| Mg13 | 0.668265  | -3.011404 | 0.109578  |
| Mg14 | -4.286664 | -0.103710 | 1.176078  |
| Mg15 | -1.293128 | -0.469007 | 0.116687  |
| Mg16 | -4.174207 | -2.173668 | -1.168800 |
| Mg17 | 0.080746  | -2.692002 | 2.963742  |
| Mg18 | -1.516570 | -3.274285 | -1.857326 |
| Mg19 | 1.198191  | 2.809143  | 1.463894  |
| Mg20 | 1.157586  | 3.621207  | -1.340988 |
| Mg21 | 1.038674  | 1.128024  | -2.904871 |
| Mg22 | 3.723116  | -0.153599 | -2.451564 |
| Mg23 | 1.073397  | -1.883733 | -2.738395 |
| Mg24 | -3.932726 | 2.838015  | 0.237358  |
| Mg25 | -1.642175 | -0.564204 | -3.127015 |
| Mg26 | -1.503791 | 2.141988  | -1.596198 |

@mg26-isomer28 bp86/6-31G(d) Etot=-5202.483432 Eb=-16.20

|      |           |           |           |
|------|-----------|-----------|-----------|
| Mg1  | -3.733513 | -2.612772 | -0.435566 |
| Mg2  | -2.623931 | 1.589551  | 2.384906  |
| Mg3  | 0.515421  | 2.745827  | -1.863721 |
| Mg4  | -1.619373 | 1.043282  | -3.236202 |
| Mg5  | 1.574757  | -3.186363 | -2.233358 |
| Mg6  | -2.560789 | 3.082921  | -0.947571 |
| Mg7  | 1.112561  | -0.223767 | -2.800926 |
| Mg8  | 0.201080  | 0.326776  | 2.798445  |
| Mg9  | -4.669132 | -0.440790 | 1.418992  |
| Mg10 | 0.849941  | -2.686059 | 2.887525  |
| Mg11 | -1.408376 | -1.874042 | -2.299774 |
| Mg12 | -0.081779 | 3.014607  | 1.234839  |
| Mg13 | 0.525741  | -1.783515 | 0.145752  |
| Mg14 | -2.007582 | -1.708471 | 2.138879  |
| Mg15 | -4.951347 | 2.384683  | 0.513003  |
| Mg16 | 3.533545  | 1.695755  | -2.235304 |
| Mg17 | 2.969234  | -3.628944 | 0.470537  |
| Mg18 | -1.180588 | -4.175628 | -0.168043 |
| Mg19 | -1.383299 | 0.411125  | -0.169871 |
| Mg20 | 3.794014  | -1.214330 | -1.223982 |
| Mg21 | 1.686356  | 0.816484  | 0.056080  |
| Mg22 | 2.913820  | 3.745588  | 0.079736  |
| Mg23 | 3.263623  | -0.957786 | 1.934243  |
| Mg24 | -4.169033 | 0.242412  | -1.560977 |
| Mg25 | 4.767831  | 1.298954  | 0.482574  |
| Mg26 | 2.680816  | 2.094502  | 2.629782  |

@mg26-isomer29 bp86/6-31G(d) Etot=-5202.482986 Eb=-16.19

|      |           |           |           |
|------|-----------|-----------|-----------|
| Mg1  | 3.156316  | -0.509444 | -2.722699 |
| Mg2  | 0.026963  | 3.616013  | 2.305285  |
| Mg3  | -4.060092 | -0.674942 | 1.949152  |
| Mg4  | 4.853500  | 0.814300  | -0.512311 |
| Mg5  | -2.700800 | 3.624799  | 0.647612  |
| Mg6  | 4.236297  | -2.182014 | 0.240473  |
| Mg7  | 2.161840  | -2.180697 | 2.804821  |
| Mg8  | 2.112585  | -3.233693 | -1.597430 |
| Mg9  | -4.387680 | -1.769440 | -0.848271 |
| Mg10 | 2.903552  | 2.497307  | -2.017408 |
| Mg11 | 0.122976  | 2.519147  | -0.394312 |
| Mg12 | -1.988356 | 1.396583  | 2.514695  |

|      |           |           |           |
|------|-----------|-----------|-----------|
| Mg13 | -2.891093 | -3.319280 | 1.251475  |
| Mg14 | -1.730102 | -3.058686 | -1.588151 |
| Mg15 | -2.465969 | 2.766274  | -2.284132 |
| Mg16 | -1.365390 | -0.236300 | -0.026902 |
| Mg17 | 3.975718  | 0.066147  | 2.246785  |
| Mg18 | 2.875853  | 2.679322  | 1.154807  |
| Mg19 | 1.635197  | -0.212888 | -0.170627 |
| Mg20 | 0.171352  | -2.981489 | 0.747750  |
| Mg21 | -4.334886 | 1.274647  | -0.468050 |
| Mg22 | 0.231285  | -1.384458 | -2.989322 |
| Mg23 | 0.972919  | 0.719354  | 2.707598  |
| Mg24 | 0.189403  | 1.492132  | -3.149766 |
| Mg25 | -1.122574 | -1.530250 | 3.017144  |
| Mg26 | -2.578816 | -0.192444 | -2.818216 |

@mg26-isomer30 bp86/6-31G(d) Etot=-5202.482442 Eb=-16.18

|      |           |           |           |
|------|-----------|-----------|-----------|
| Mg1  | -1.600922 | -1.042757 | 3.010236  |
| Mg2  | -4.322069 | -1.915776 | -1.133260 |
| Mg3  | 1.277339  | 1.177347  | -0.604346 |
| Mg4  | -2.752614 | 1.844945  | 1.942194  |
| Mg5  | -0.045230 | -3.337736 | 1.570749  |
| Mg6  | -3.338094 | 4.022727  | -0.016578 |
| Mg7  | 4.444844  | 1.376807  | -0.563499 |
| Mg8  | 2.790167  | 4.068069  | -0.348579 |
| Mg9  | -1.237943 | -0.304618 | 0.103550  |
| Mg10 | 4.616930  | -1.843764 | -0.856153 |
| Mg11 | 1.478902  | -0.786336 | 2.209136  |
| Mg12 | -1.439073 | 2.331949  | -1.649496 |
| Mg13 | 0.324891  | -1.824529 | -3.549301 |
| Mg14 | -0.154135 | 3.583511  | 0.799729  |
| Mg15 | 1.439806  | -1.972679 | -0.763634 |
| Mg16 | 2.984466  | -0.202243 | -2.750487 |
| Mg17 | -4.212721 | 1.173523  | -0.874234 |
| Mg18 | 4.447609  | -0.535566 | 1.857419  |
| Mg19 | -1.424485 | -3.024409 | -1.343153 |
| Mg20 | 0.358579  | 1.102230  | -3.637450 |
| Mg21 | -4.364722 | -0.646684 | 1.596946  |
| Mg22 | -2.260298 | -0.371070 | -2.824597 |
| Mg23 | 0.006093  | 1.652728  | 3.055065  |
| Mg24 | 3.156787  | -3.279855 | 1.468317  |
| Mg25 | 2.877709  | 2.053770  | 2.025681  |
| Mg26 | -3.051817 | -3.299583 | 1.275745  |

@mg26-isomer31 bp86/6-31G(d) Etot=-5202.478205 Eb=-16.08

|      |           |           |           |
|------|-----------|-----------|-----------|
| Mg1  | 3.883995  | 1.208981  | -1.922105 |
| Mg2  | -1.125380 | 0.128973  | 0.108240  |
| Mg3  | 1.530097  | 0.770720  | 2.968304  |
| Mg4  | 5.136336  | -1.083730 | -0.506182 |
| Mg5  | 1.014727  | -2.266660 | 2.217636  |
| Mg6  | -2.318220 | 0.442903  | -2.703214 |
| Mg7  | -1.202087 | 3.267476  | -1.666245 |
| Mg8  | -0.119657 | -1.588171 | -3.284790 |
| Mg9  | 1.819960  | -0.250178 | 0.047825  |
| Mg10 | -4.553582 | -3.635771 | 0.190671  |
| Mg11 | -4.532278 | -0.717074 | -0.741618 |
| Mg12 | 2.281468  | 3.758640  | -1.427386 |
| Mg13 | 2.798902  | -1.694362 | -2.433519 |
| Mg14 | -1.003152 | -0.735897 | 3.679772  |
| Mg15 | -2.569501 | -2.593282 | -1.933531 |
| Mg16 | 3.857224  | 1.924522  | 1.013452  |
| Mg17 | -1.197620 | 2.109547  | 3.063405  |
| Mg18 | 0.169320  | -2.902306 | -0.589542 |
| Mg19 | 0.544977  | 2.658688  | 0.735765  |
| Mg20 | -2.577577 | 3.657718  | 0.967357  |

|      |           |           |           |
|------|-----------|-----------|-----------|
| Mg21 | 3.257307  | -3.274824 | 0.329778  |
| Mg22 | 0.793712  | 1.173201  | -2.479021 |
| Mg23 | -4.081891 | 2.220333  | -1.058105 |
| Mg24 | -3.643958 | 0.731128  | 1.746780  |
| Mg25 | 4.019814  | -0.946945 | 2.234474  |
| Mg26 | -2.182937 | -2.363630 | 1.441798  |

@mg26-isomer32 bp86/6-31G(d) Etot=-5202.476831 Eb=-16.04

|      |           |           |           |
|------|-----------|-----------|-----------|
| Mg1  | 1.722634  | -2.604673 | 2.085335  |
| Mg2  | 0.888750  | 0.825646  | -3.805916 |
| Mg3  | -1.028155 | -1.811699 | 3.185647  |
| Mg4  | -2.243571 | -2.661745 | -1.457269 |
| Mg5  | 1.202394  | 4.144029  | -0.102747 |
| Mg6  | -2.227877 | 0.012776  | -3.007696 |
| Mg7  | 3.891783  | -2.530350 | -0.038215 |
| Mg8  | -4.589686 | -0.788786 | -1.197282 |
| Mg9  | -4.464950 | 1.150541  | 1.221574  |
| Mg10 | 0.865578  | -2.877909 | -0.779006 |
| Mg11 | 2.826197  | 2.164840  | -1.812046 |
| Mg12 | 4.841105  | 0.369239  | -0.528738 |
| Mg13 | -2.020333 | 1.040857  | 2.941713  |
| Mg14 | 0.311279  | 2.972932  | 2.465621  |
| Mg15 | 1.210888  | 0.246702  | 2.948171  |
| Mg16 | -1.290190 | -3.907778 | 1.140768  |
| Mg17 | 3.251617  | 2.261923  | 1.313467  |
| Mg18 | -2.168602 | 3.213400  | 0.745645  |
| Mg19 | -0.562749 | 2.183674  | -1.652521 |
| Mg20 | 0.017303  | -1.969294 | -3.430256 |
| Mg21 | 4.029968  | -0.592201 | 2.241243  |
| Mg22 | 1.438778  | 0.073641  | -0.114120 |
| Mg23 | 2.970340  | -1.026797 | -2.561267 |
| Mg24 | -1.431241 | -0.169689 | 0.231546  |
| Mg25 | -3.780533 | 2.146342  | -1.528568 |
| Mg26 | -3.660727 | -1.865621 | 1.494917  |

@mg26-isomer33 bp86/6-31G(d) Etot=-5202.472172 Eb=-15.93

|      |           |           |           |
|------|-----------|-----------|-----------|
| Mg1  | -1.559091 | -4.181156 | 1.091576  |
| Mg2  | 4.900047  | 0.254161  | 0.683289  |
| Mg3  | 0.302772  | -2.627171 | -0.734459 |
| Mg4  | -2.740634 | 0.890348  | -2.976250 |
| Mg5  | -1.320632 | 0.090478  | -0.032808 |
| Mg6  | 5.077825  | -0.815860 | -2.100464 |
| Mg7  | -3.970098 | 1.372293  | 1.191019  |
| Mg8  | 0.497389  | 1.096361  | 3.029336  |
| Mg9  | 1.669034  | -0.169720 | 0.429716  |
| Mg10 | 0.270666  | 1.456790  | -2.430362 |
| Mg11 | -0.283577 | -1.728455 | 2.309027  |
| Mg12 | 1.660211  | -4.235819 | 1.633529  |
| Mg13 | -2.307872 | 0.242322  | 3.455406  |
| Mg14 | 3.649079  | -2.600551 | -0.002674 |
| Mg15 | -3.483953 | -1.749984 | 1.505012  |
| Mg16 | 0.938651  | 2.772743  | 0.340120  |
| Mg17 | 3.298647  | 1.949167  | 2.603933  |
| Mg18 | 2.137013  | -1.063073 | -2.622232 |
| Mg19 | -1.920954 | 3.047061  | -0.873157 |
| Mg20 | -2.691072 | -2.717227 | -1.312958 |
| Mg21 | -4.819952 | 2.534299  | -1.538738 |
| Mg22 | -0.782853 | -1.304841 | -3.209910 |
| Mg23 | -1.578743 | 2.974850  | 2.146155  |
| Mg24 | 4.510539  | 3.312578  | 0.285579  |
| Mg25 | -4.656047 | -0.496620 | -1.046233 |
| Mg26 | 3.203609  | 1.697025  | -1.823454 |

@mg26-isomer34 bp86/6-31G(d) Etot=-5202.468864 Eb=-15.85

|      |           |           |           |
|------|-----------|-----------|-----------|
| Mg1  | -0.127641 | 0.796202  | -0.316502 |
| Mg2  | -1.887186 | 0.494959  | -2.811971 |
| Mg3  | 0.733442  | 2.352860  | -2.735647 |
| Mg4  | 0.335198  | 3.764706  | 0.111127  |
| Mg5  | 1.026544  | -0.743306 | -2.881585 |
| Mg6  | 2.973529  | 2.369867  | 0.021680  |
| Mg7  | 0.957933  | 1.829812  | 2.470927  |
| Mg8  | -4.226914 | 1.531481  | -0.633294 |
| Mg9  | -1.225102 | -2.398523 | -1.917292 |
| Mg10 | 3.956893  | 0.794738  | 2.612271  |
| Mg11 | 3.539474  | 0.975694  | -2.594830 |
| Mg12 | -2.456046 | -0.574536 | 0.514788  |
| Mg13 | 1.400170  | -3.391443 | -1.154615 |
| Mg14 | 5.126601  | 0.273019  | -0.101734 |
| Mg15 | -3.129921 | -3.488745 | 0.168601  |
| Mg16 | -1.992193 | 2.498097  | 1.531500  |
| Mg17 | 1.626911  | -1.122578 | 3.312087  |
| Mg18 | -1.178548 | -0.131040 | 3.248846  |
| Mg19 | -5.275220 | -1.439899 | 0.888632  |
| Mg20 | 4.049331  | -1.963947 | -1.809220 |
| Mg21 | -4.250942 | 0.856955  | 2.567535  |
| Mg22 | -0.233733 | -2.444760 | 1.234102  |
| Mg23 | -2.080812 | 3.314345  | -1.639061 |
| Mg24 | 2.158930  | -0.713076 | 0.259582  |
| Mg25 | -4.233804 | -1.348987 | -1.985094 |
| Mg26 | 4.413107  | -2.091895 | 1.639168  |

@mg26-isomer35 bp86/6-31G(d) Etot=-5202.468090 Eb=-15.83

|      |           |           |           |
|------|-----------|-----------|-----------|
| Mg1  | -1.189436 | 0.299864  | 0.111544  |
| Mg2  | -1.182551 | -2.779236 | -0.635447 |
| Mg3  | -0.018302 | 3.265049  | 1.892022  |
| Mg4  | 1.088504  | 2.838469  | -0.935637 |
| Mg5  | 1.684881  | -0.103396 | -1.071854 |
| Mg6  | -0.999805 | 0.508383  | 3.204076  |
| Mg7  | -3.285985 | -4.623445 | 0.792885  |
| Mg8  | -0.469611 | 1.261409  | -2.991781 |
| Mg9  | -1.899990 | 3.224511  | -0.946656 |
| Mg10 | -4.073431 | 0.017382  | 2.458443  |
| Mg11 | 0.087332  | -1.692739 | -3.137832 |
| Mg12 | -3.359163 | 2.090896  | -3.365558 |
| Mg13 | 1.911237  | -3.109951 | -1.037651 |
| Mg14 | 4.733038  | -0.809902 | -1.225930 |
| Mg15 | 4.960450  | 1.125123  | 1.256388  |
| Mg16 | 3.110802  | 3.594234  | 1.202284  |
| Mg17 | -2.172140 | -2.219381 | 2.441958  |
| Mg18 | -2.790198 | -0.793440 | -2.574978 |
| Mg19 | -2.876500 | 2.608742  | 1.849279  |
| Mg20 | 3.719759  | -1.646664 | 1.550040  |
| Mg21 | -4.040041 | -1.725759 | 0.016283  |
| Mg22 | -4.182189 | 1.195691  | -0.556540 |
| Mg23 | 4.050466  | 2.164968  | -1.406447 |
| Mg24 | 0.622683  | -1.830227 | 1.579578  |
| Mg25 | 4.795322  | -3.781853 | -0.315179 |
| Mg26 | 1.774868  | 0.921272  | 1.846710  |

@mg26-isomer36 bp86/6-31G(d) Etot=-5202.465771 Eb=-15.78

|     |           |           |           |
|-----|-----------|-----------|-----------|
| Mg1 | -4.653241 | -1.792452 | 1.226159  |
| Mg2 | 0.116647  | 3.307038  | 0.722049  |
| Mg3 | 2.602388  | -0.738698 | -2.116040 |
| Mg4 | 3.259633  | 4.241412  | -0.194893 |
| Mg5 | 0.465693  | -2.836991 | 0.148150  |
| Mg6 | -2.206602 | -0.452371 | 2.386024  |
| Mg7 | 0.266017  | 1.229866  | 2.930890  |
| Mg8 | -2.463559 | 2.522243  | 2.395657  |

|      |           |           |           |
|------|-----------|-----------|-----------|
| Mg9  | 3.150272  | -3.655826 | -1.307023 |
| Mg10 | 4.469022  | 1.415156  | -0.418417 |
| Mg11 | -2.480093 | -0.149626 | -2.839801 |
| Mg12 | 0.479875  | -1.870409 | 3.032552  |
| Mg13 | 1.631706  | 2.027537  | -1.543253 |
| Mg14 | -2.950608 | 4.114607  | -0.010330 |
| Mg15 | -3.668158 | 1.074305  | -0.011220 |
| Mg16 | -1.352479 | 2.527854  | -1.968946 |
| Mg17 | -2.429573 | -2.430142 | -0.807791 |
| Mg18 | -0.577622 | 0.132700  | -0.235040 |
| Mg19 | -2.056860 | -3.443268 | 1.960117  |
| Mg20 | 2.190111  | -0.271766 | 1.015846  |
| Mg21 | 0.269373  | 0.602528  | -3.793717 |
| Mg22 | 3.009636  | 2.454065  | 2.162242  |
| Mg23 | 4.953594  | -1.619357 | -0.072929 |
| Mg24 | 3.147711  | -3.181660 | 1.720447  |
| Mg25 | -0.002340 | -2.112165 | -2.733594 |
| Mg26 | -5.170543 | -1.094578 | -1.647139 |

@mg26-isomer37 bp86/6-31G(d) Etot=-5202.404278 Eb=-14.29

|      |           |           |           |
|------|-----------|-----------|-----------|
| Mg1  | 0.261827  | 0.434214  | 0.250097  |
| Mg2  | 1.158058  | 2.360123  | -1.799252 |
| Mg3  | 6.141693  | 0.896625  | -1.223671 |
| Mg4  | 2.484674  | 2.443622  | 1.102471  |
| Mg5  | 0.542895  | -0.814584 | -2.521041 |
| Mg6  | -1.905300 | -1.715081 | -0.854634 |
| Mg7  | 0.882423  | -2.668577 | 0.008614  |
| Mg8  | 2.750873  | -3.049992 | -2.270246 |
| Mg9  | 3.127854  | 0.043220  | -0.928350 |
| Mg10 | 4.074629  | 3.118380  | -1.398873 |
| Mg11 | -2.595354 | 1.010621  | 1.200064  |
| Mg12 | -3.948572 | -1.898639 | 1.387845  |
| Mg13 | 3.709410  | -3.584336 | 0.597188  |
| Mg14 | -1.797149 | 1.435103  | -1.939196 |
| Mg15 | -4.363852 | -0.158008 | -1.480767 |
| Mg16 | 5.526409  | 2.608582  | 1.214921  |
| Mg17 | -0.930152 | -1.492227 | 2.240533  |
| Mg18 | -5.652807 | 0.721998  | 1.507215  |
| Mg19 | 2.310257  | -0.881232 | 2.077161  |
| Mg20 | -7.014246 | 1.376805  | -1.171071 |
| Mg21 | -6.597823 | -1.836573 | -0.106242 |
| Mg22 | -8.718022 | 0.073932  | 1.020858  |
| Mg23 | -4.293420 | 2.797383  | -0.532233 |
| Mg24 | 4.030513  | 1.321836  | 3.477430  |
| Mg25 | 5.476380  | -2.021354 | -1.239431 |
| Mg26 | 5.338802  | -0.521842 | 1.380610  |

@mg27-isomer01 bp86/6-31G(d) Etot=-5402.604423 Eb=-16.79

|      |           |           |           |
|------|-----------|-----------|-----------|
| Mg1  | 0.791825  | -3.416341 | 0.547699  |
| Mg2  | 2.018044  | 1.742619  | 2.613760  |
| Mg3  | -4.649163 | 0.834430  | -0.134105 |
| Mg4  | 3.682768  | -2.935885 | 1.024574  |
| Mg5  | -3.707290 | -0.396947 | 2.650494  |
| Mg6  | 1.493767  | -1.512622 | 2.818836  |
| Mg7  | 2.035648  | 3.822439  | 0.094991  |
| Mg8  | -3.187454 | -1.430394 | -2.233462 |
| Mg9  | 1.973460  | -0.224222 | -3.134643 |
| Mg10 | -0.835895 | 0.490827  | 3.075284  |
| Mg11 | 1.480781  | 0.021331  | -0.001472 |
| Mg12 | -0.915465 | 0.067533  | -3.984950 |
| Mg13 | 4.417764  | 2.161482  | 0.618270  |
| Mg14 | 4.213958  | -0.311969 | 2.200539  |
| Mg15 | -0.165466 | -1.970068 | -1.960247 |
| Mg16 | -0.006493 | 2.171808  | -1.831527 |

|      |           |           |           |
|------|-----------|-----------|-----------|
| Mg17 | 3.169846  | 2.253432  | -2.104773 |
| Mg18 | 4.508513  | -0.504096 | -1.033757 |
| Mg19 | -1.569112 | -2.419995 | 2.207021  |
| Mg20 | -3.045953 | 1.560792  | -2.659051 |
| Mg21 | -2.778709 | 3.476507  | -0.513610 |
| Mg22 | -3.223994 | 2.439993  | 2.213999  |
| Mg23 | -2.100132 | -3.762383 | -0.538671 |
| Mg24 | -1.586388 | 0.069385  | 0.029084  |
| Mg25 | -0.448569 | 2.914866  | 1.304530  |
| Mg26 | -4.331631 | -2.256527 | 0.509535  |
| Mg27 | 2.765340  | -2.885995 | -1.778348 |

@mg27-isomer02 bp86/6-31G(d) Etot=-5402.604262 Eb=-16.79

|      |           |           |           |
|------|-----------|-----------|-----------|
| Mg1  | 2.970913  | -3.931810 | -1.304149 |
| Mg2  | 3.989310  | -1.031939 | -1.439532 |
| Mg3  | 3.687263  | -2.763363 | 1.268501  |
| Mg4  | 1.224637  | -1.842309 | -2.488100 |
| Mg5  | 4.366109  | 1.912077  | -1.067403 |
| Mg6  | 1.955669  | 1.025145  | -2.923901 |
| Mg7  | 4.122509  | 0.276783  | 1.594897  |
| Mg8  | -0.988227 | -0.191288 | -3.437613 |
| Mg9  | 0.444039  | -2.783223 | 0.342275  |
| Mg10 | 1.398732  | 0.363399  | 0.066110  |
| Mg11 | -1.631914 | -2.874865 | -2.079194 |
| Mg12 | 1.934372  | 3.673840  | -1.296896 |
| Mg13 | 1.570261  | -1.382184 | 2.853267  |
| Mg14 | 1.738959  | 1.614788  | 3.124429  |
| Mg15 | -2.827307 | -3.624176 | 0.531444  |
| Mg16 | -0.674214 | 2.390454  | -1.992417 |
| Mg17 | -1.516085 | -0.156448 | -0.230078 |
| Mg18 | -1.273752 | -2.623148 | 2.835984  |
| Mg19 | -3.435851 | 1.181394  | -2.376737 |
| Mg20 | -0.290022 | 2.843846  | 1.092535  |
| Mg21 | -4.250207 | -1.545740 | -1.165289 |
| Mg22 | -3.047125 | 3.520280  | -0.419184 |
| Mg23 | -0.922192 | 0.313542  | 2.863695  |
| Mg24 | 3.251775  | 3.313701  | 1.306517  |
| Mg25 | -3.663795 | -0.945269 | 1.973600  |
| Mg26 | -5.013423 | 1.097404  | 0.156098  |
| Mg27 | -3.120434 | 2.169110  | 2.211140  |

@mg27-isomer03 bp86/6-31G(d) Etot=-5402.603956 Eb=-16.78

|      |           |           |           |
|------|-----------|-----------|-----------|
| Mg1  | 2.186029  | -3.459105 | 1.273440  |
| Mg2  | -0.629891 | -2.384314 | 0.483822  |
| Mg3  | 4.365771  | 2.050695  | 1.193334  |
| Mg4  | -2.197774 | -2.179539 | 3.007195  |
| Mg5  | -0.519467 | -0.824170 | -2.664041 |
| Mg6  | 4.029039  | -2.727188 | -0.861490 |
| Mg7  | -1.616837 | 0.491619  | -0.084386 |
| Mg8  | 0.816621  | -1.313177 | 2.987484  |
| Mg9  | 2.525535  | -0.423297 | -2.728927 |
| Mg10 | -4.624949 | 1.608840  | -0.933635 |
| Mg11 | 2.183654  | 3.881276  | 0.346899  |
| Mg12 | -3.469281 | 2.599200  | 1.628546  |
| Mg13 | -2.465217 | 1.437862  | -3.015894 |
| Mg14 | -1.863925 | -3.539162 | -2.056509 |
| Mg15 | -3.613067 | -1.153396 | -1.802484 |
| Mg16 | -4.132256 | -0.418198 | 1.457055  |
| Mg17 | 3.776303  | -0.899064 | 1.865402  |
| Mg18 | 0.335831  | 2.247185  | -1.942155 |
| Mg19 | 3.385792  | 2.394498  | -1.862534 |
| Mg20 | -2.423084 | 3.700825  | -1.068830 |
| Mg21 | -1.359907 | 0.712085  | 3.019757  |
| Mg22 | 4.989686  | 0.057046  | -0.898826 |

|      |           |           |           |
|------|-----------|-----------|-----------|
| Mg23 | 1.404694  | -0.026481 | 0.060495  |
| Mg24 | -3.563656 | -3.300027 | 0.503548  |
| Mg25 | -0.505292 | 3.000860  | 1.221144  |
| Mg26 | 1.252839  | -3.095124 | -1.812538 |
| Mg27 | 1.732810  | 1.560253  | 2.684127  |

@mg27-isomer04 bp86/6-31G(d) Etot=-5402.602532 Eb=-16.75

|      |           |           |           |
|------|-----------|-----------|-----------|
| Mg1  | -3.046661 | 3.620346  | -0.741040 |
| Mg2  | -0.441117 | 2.779792  | 0.748474  |
| Mg3  | -4.671907 | 1.155451  | -1.045876 |
| Mg4  | -3.369274 | 2.002637  | 1.813452  |
| Mg5  | 1.445464  | -0.128940 | -0.006513 |
| Mg6  | -2.119722 | -1.161358 | 2.917547  |
| Mg7  | -0.797052 | 1.454016  | 3.438050  |
| Mg8  | -1.590729 | -0.009402 | 0.168074  |
| Mg9  | -3.454534 | -1.555119 | -1.859780 |
| Mg10 | -0.257839 | -2.733308 | 1.018403  |
| Mg11 | -3.258107 | -3.282870 | 0.804711  |
| Mg12 | 4.005356  | -0.265677 | 1.830200  |
| Mg13 | 4.606610  | 2.604568  | 0.992183  |
| Mg14 | -1.599882 | -4.002629 | -1.537412 |
| Mg15 | 1.047085  | -0.832126 | 3.077036  |
| Mg16 | -2.053677 | 1.205773  | -2.639417 |
| Mg17 | -0.418235 | 3.698341  | -2.170262 |
| Mg18 | 2.638501  | -1.298262 | -2.867091 |
| Mg19 | 4.099383  | 0.919472  | -1.463358 |
| Mg20 | 2.015117  | 2.032839  | 2.392126  |
| Mg21 | 1.664017  | -3.603188 | -1.231277 |
| Mg22 | 1.194486  | 1.305053  | -2.778716 |
| Mg23 | 2.285052  | 3.340007  | -0.697515 |
| Mg24 | -0.352812 | -1.393826 | -2.372522 |
| Mg25 | -4.685346 | -0.730191 | 1.224682  |
| Mg26 | 4.384005  | -2.120614 | -0.629785 |
| Mg27 | 2.731818  | -3.000786 | 1.615625  |

@mg27-isomer05 bp86/6-31G(d) Etot=-5402.602454 Eb=-16.75

|      |           |           |           |
|------|-----------|-----------|-----------|
| Mg1  | -0.345428 | -0.023395 | 4.010724  |
| Mg2  | -3.116995 | -0.493607 | 2.462154  |
| Mg3  | 2.313008  | -1.495011 | 2.714309  |
| Mg4  | 3.313984  | 3.313062  | 0.644003  |
| Mg5  | 2.242875  | -3.120346 | -1.953798 |
| Mg6  | -1.468211 | 0.348840  | -0.015233 |
| Mg7  | -2.423938 | -0.546420 | -2.778559 |
| Mg8  | 5.054833  | 1.983784  | -1.300884 |
| Mg9  | 1.615964  | -3.941789 | 0.859556  |
| Mg10 | 3.742925  | -0.543040 | -2.072983 |
| Mg11 | -1.553193 | 2.335956  | 2.379552  |
| Mg12 | 4.326398  | 0.450321  | 1.281780  |
| Mg13 | -3.150423 | -3.244130 | 1.007276  |
| Mg14 | -4.348686 | 1.987626  | 1.147724  |
| Mg15 | 2.145350  | 2.152631  | -2.252630 |
| Mg16 | -0.968729 | 2.240196  | -2.575521 |
| Mg17 | 0.688887  | -0.465839 | -2.905217 |
| Mg18 | -2.493901 | 3.900577  | -0.220193 |
| Mg19 | -3.940381 | 1.918800  | -1.877456 |
| Mg20 | -0.533199 | -2.072941 | 1.872982  |
| Mg21 | 0.375814  | 2.987602  | 0.081613  |
| Mg22 | -0.648270 | -2.658691 | -1.122992 |
| Mg23 | -4.493544 | -0.699415 | -0.383255 |
| Mg24 | -3.542454 | -3.252263 | -1.925261 |
| Mg25 | 1.610080  | 1.631543  | 2.501326  |
| Mg26 | 1.465843  | -0.241984 | 0.054044  |
| Mg27 | 4.131388  | -2.452067 | 0.366940  |



@mg27-isomer06 bp86/6-31G(d) Etot=-5402.602216 Eb=-16.74

|      |           |           |           |
|------|-----------|-----------|-----------|
| Mg1  | 2.196991  | 0.416985  | -3.131012 |
| Mg2  | 2.778460  | 3.017533  | -1.676438 |
| Mg3  | -0.916892 | -0.240181 | -3.853578 |
| Mg4  | -3.446551 | -0.293079 | 2.263763  |
| Mg5  | 3.038144  | 0.273867  | 2.629545  |
| Mg6  | 1.490744  | 0.114318  | -0.022579 |
| Mg7  | 0.714768  | -2.086099 | -2.203272 |
| Mg8  | -0.177359 | 2.109746  | -2.287058 |
| Mg9  | 4.269735  | -1.926337 | 1.045317  |
| Mg10 | -4.789953 | -0.759192 | -0.706634 |
| Mg11 | 0.427540  | 3.278980  | 0.401286  |
| Mg12 | -0.335251 | -0.003229 | 2.723515  |
| Mg13 | 1.122206  | 2.548148  | 3.166392  |
| Mg14 | -4.462898 | 1.946427  | 0.482963  |
| Mg15 | -2.513577 | -2.206822 | -2.156364 |
| Mg16 | 1.502536  | -2.397384 | 2.296291  |
| Mg17 | 3.736007  | -1.864798 | -1.948648 |
| Mg18 | -2.007638 | 2.514014  | 2.207176  |
| Mg19 | -1.673419 | -2.655414 | 2.866604  |
| Mg20 | 3.410819  | 2.944550  | 1.216945  |
| Mg21 | -3.201945 | 1.237387  | -2.398580 |
| Mg22 | 2.378609  | -3.866178 | -0.207577 |
| Mg23 | -3.593356 | -3.086041 | 0.638455  |
| Mg24 | -0.648683 | -3.383934 | 0.150952  |
| Mg25 | -1.459899 | -0.007285 | -0.194377 |
| Mg26 | -2.383673 | 3.621062  | -0.699485 |
| Mg27 | 4.544538  | 0.752957  | -0.603603 |

@mg27-isomer07 bp86/6-31G(d) Etot=-5402.600918 Eb=-16.71

|      |           |           |           |
|------|-----------|-----------|-----------|
| Mg1  | 2.044235  | 3.510349  | -1.572518 |
| Mg2  | 4.541640  | 2.194695  | -0.699614 |
| Mg3  | 3.850924  | -2.881028 | 1.022829  |
| Mg4  | -0.677014 | -2.688484 | -1.410645 |
| Mg5  | 2.158640  | -1.594558 | 3.084796  |
| Mg6  | -2.360164 | -0.623568 | -3.003028 |
| Mg7  | -3.679063 | -2.859805 | -1.151631 |
| Mg8  | 2.711746  | 0.683722  | -2.648870 |
| Mg9  | -4.813893 | -0.100024 | -1.283216 |
| Mg10 | -4.563574 | 1.723796  | 1.015613  |
| Mg11 | 2.415017  | -2.684127 | -1.698577 |
| Mg12 | -1.625937 | 0.003669  | -0.055720 |
| Mg13 | 2.697925  | 3.296560  | 1.394474  |
| Mg14 | -0.176452 | 1.510216  | -2.414506 |
| Mg15 | 1.372668  | -0.237926 | 0.023244  |
| Mg16 | -3.843898 | -1.206037 | 1.732585  |
| Mg17 | -3.004255 | 2.467214  | -1.592448 |
| Mg18 | -2.779819 | 4.071653  | 1.054569  |
| Mg19 | -2.066184 | 1.454274  | 2.701975  |
| Mg20 | 0.898651  | -3.362062 | 1.074307  |
| Mg21 | 0.542463  | -1.124167 | -3.691717 |
| Mg22 | 0.992887  | 1.168029  | 2.816686  |
| Mg23 | -0.863731 | -1.363125 | 2.709747  |
| Mg24 | -0.151229 | 2.723335  | 0.431349  |
| Mg25 | 3.901585  | 0.454621  | 1.815004  |
| Mg26 | -2.200922 | -3.714972 | 1.266782  |
| Mg27 | 4.677756  | -0.822249 | -0.921469 |

@mg27-isomer08 bp86/6-31G(d) Etot=-5402.600376 Eb=-16.70

|     |           |           |          |
|-----|-----------|-----------|----------|
| Mg1 | -4.334970 | 1.769642  | 1.362452 |
| Mg2 | -1.626128 | 0.846232  | 2.935136 |
| Mg3 | -1.693681 | 3.279870  | 0.930577 |
| Mg4 | -3.901127 | -1.070531 | 2.125399 |
| Mg5 | 0.779089  | 2.731411  | 2.808945 |

|      |           |           |           |
|------|-----------|-----------|-----------|
| Mg6  | 1.288712  | -0.282278 | 2.882450  |
| Mg7  | -1.115192 | -2.138818 | 2.266631  |
| Mg8  | -3.772649 | 2.810010  | -1.298233 |
| Mg9  | -4.511461 | -0.484298 | -0.913664 |
| Mg10 | 3.547955  | 1.607636  | 2.115502  |
| Mg11 | -1.682128 | 0.252490  | -0.080854 |
| Mg12 | 1.005339  | 1.702497  | 0.061327  |
| Mg13 | 1.913031  | -3.264445 | 2.125604  |
| Mg14 | 3.202048  | 3.812403  | 0.055835  |
| Mg15 | 0.928342  | -1.237558 | -0.024435 |
| Mg16 | 4.012481  | -1.203669 | 1.114309  |
| Mg17 | 4.795092  | 1.327334  | -0.615631 |
| Mg18 | -0.781491 | 2.900277  | -2.124418 |
| Mg19 | -2.645133 | 0.697935  | -3.058551 |
| Mg20 | -3.283828 | -3.274253 | 0.265003  |
| Mg21 | -1.943042 | -2.091676 | -2.158833 |
| Mg22 | -0.378256 | -3.932589 | -0.161457 |
| Mg23 | 3.259063  | -0.775368 | -2.048617 |
| Mg24 | 0.301540  | 0.144917  | -2.796583 |
| Mg25 | 2.504630  | 2.266044  | -2.536142 |
| Mg26 | 3.071508  | -3.605356 | -0.562327 |
| Mg27 | 1.060257  | -2.787859 | -2.669425 |

@mg27-isomer09 bp86/6-31G(d) Etot=-5402.600161 Eb=-16.69

|      |           |           |           |
|------|-----------|-----------|-----------|
| Mg1  | 1.523056  | -0.336580 | 0.076861  |
| Mg2  | -0.847408 | 1.547305  | -2.518520 |
| Mg3  | 4.046811  | 0.239657  | 2.264910  |
| Mg4  | -0.027557 | -2.529701 | -1.598510 |
| Mg5  | 0.357485  | -0.802800 | -3.976274 |
| Mg6  | -0.535463 | -3.029804 | 1.366810  |
| Mg7  | -1.491929 | 2.412490  | 2.149883  |
| Mg8  | 2.943021  | -1.901941 | -2.135957 |
| Mg9  | 2.142839  | 1.152691  | -2.594674 |
| Mg10 | 1.953650  | -1.933732 | 2.664539  |
| Mg11 | 3.396838  | 3.065865  | 1.503573  |
| Mg12 | -2.533577 | -1.101469 | -2.710071 |
| Mg13 | 0.722783  | 2.688941  | -0.075801 |
| Mg14 | 3.492343  | 3.533288  | -1.384920 |
| Mg15 | -4.736988 | -1.233098 | -0.533313 |
| Mg16 | -3.408052 | -2.475756 | 1.960393  |
| Mg17 | -3.862130 | 1.501339  | -1.545684 |
| Mg18 | -2.784701 | -3.542035 | -0.773290 |
| Mg19 | 2.162441  | -3.851407 | 0.127047  |
| Mg20 | 4.447529  | -2.131413 | 0.579514  |
| Mg21 | 4.516850  | 0.620443  | -0.756324 |
| Mg22 | -3.902548 | 0.477237  | 1.913005  |
| Mg23 | 1.242353  | 1.265231  | 2.767557  |
| Mg24 | -1.998737 | 3.792203  | -0.815680 |
| Mg25 | -1.466548 | -0.090552 | 0.028659  |
| Mg26 | -4.233444 | 3.260530  | 0.967414  |
| Mg27 | -1.118916 | -0.596933 | 3.048853  |

@mg27-isomer10 bp86/6-31G(d) Etot=-5402.598701 Eb=-16.66

|      |           |           |           |
|------|-----------|-----------|-----------|
| Mg1  | -1.690406 | 0.000745  | -0.042293 |
| Mg2  | 1.353623  | -0.003811 | 0.220865  |
| Mg3  | 1.397938  | -2.702213 | -1.542000 |
| Mg4  | -1.204773 | -3.367823 | -0.186095 |
| Mg5  | -1.186974 | -1.581589 | -2.831134 |
| Mg6  | -0.532761 | 1.554260  | 2.493093  |
| Mg7  | 4.019824  | 1.470643  | -2.175511 |
| Mg8  | -1.189865 | 1.583356  | -2.829850 |
| Mg9  | -1.212793 | 3.374210  | -0.183367 |
| Mg10 | 3.836999  | 2.970649  | 0.363117  |
| Mg11 | 1.229335  | 3.755234  | 1.479851  |

|      |           |           |           |
|------|-----------|-----------|-----------|
| Mg12 | 2.571381  | 1.472530  | 2.773941  |
| Mg13 | -4.788483 | -0.003696 | 0.333674  |
| Mg14 | -3.071455 | -0.003317 | 3.046179  |
| Mg15 | 3.840662  | -2.965931 | 0.358764  |
| Mg16 | -0.528970 | -1.557034 | 2.494399  |
| Mg17 | 1.235005  | -3.754646 | 1.477057  |
| Mg18 | 2.576746  | -1.475248 | 2.775491  |
| Mg19 | -3.692265 | -0.001764 | -2.661803 |
| Mg20 | 1.391001  | 2.700465  | -1.533500 |
| Mg21 | 1.459755  | 0.002076  | -3.098555 |
| Mg22 | 4.022279  | -1.460310 | -2.176473 |
| Mg23 | -3.373687 | -2.589232 | 1.680836  |
| Mg24 | -3.378096 | 2.582741  | 1.681152  |
| Mg25 | 4.553970  | 0.002993  | 0.700666  |
| Mg26 | -3.821002 | 2.584985  | -1.309096 |
| Mg27 | -3.816986 | -2.588272 | -1.309410 |

@mg27-isomer11 bp86/6-31G(d) Etot=-5402.597821 Eb=-16.64

|      |           |           |           |
|------|-----------|-----------|-----------|
| Mg1  | -3.314282 | 0.968781  | -2.270488 |
| Mg2  | 3.785516  | -2.667913 | 1.583706  |
| Mg3  | -1.555065 | -0.182021 | 0.083076  |
| Mg4  | 2.430004  | 1.438549  | -2.858560 |
| Mg5  | 1.337812  | 0.404330  | -0.290146 |
| Mg6  | 2.595041  | 3.119468  | 1.776786  |
| Mg7  | 1.763999  | -1.564792 | 3.640942  |
| Mg8  | 2.221798  | -1.536771 | -3.083140 |
| Mg9  | -0.397354 | 3.290709  | 0.980394  |
| Mg10 | -4.837213 | 1.261963  | 0.496469  |
| Mg11 | -4.851161 | -1.505545 | -0.668909 |
| Mg12 | -2.423499 | -3.256282 | 0.438561  |
| Mg13 | 0.514518  | 0.987149  | 2.663164  |
| Mg14 | -0.503317 | -0.201026 | -3.002369 |
| Mg15 | 2.846669  | -3.576168 | -1.018986 |
| Mg16 | 0.683188  | -2.471194 | 1.004550  |
| Mg17 | 1.937574  | 3.838766  | -1.068246 |
| Mg18 | -3.043255 | 3.447542  | -0.317598 |
| Mg19 | 4.251451  | -0.822209 | -0.959145 |
| Mg20 | 3.606849  | 0.323091  | 1.977281  |
| Mg21 | -4.007678 | -1.118859 | 2.144532  |
| Mg22 | -1.264869 | -1.412541 | 3.100398  |
| Mg23 | -0.104384 | -3.031041 | -1.803412 |
| Mg24 | -2.755700 | -2.147572 | -2.544132 |
| Mg25 | 4.296048  | 2.181342  | -0.477323 |
| Mg26 | -0.687650 | 2.580069  | -2.006968 |
| Mg27 | -2.525040 | 1.652175  | 2.479565  |

@mg27-isomer12 bp86/6-31G(d) Etot=-5402.597032 Eb=-16.62

|      |           |           |           |
|------|-----------|-----------|-----------|
| Mg1  | 3.584004  | 1.951382  | 1.252778  |
| Mg2  | 2.798827  | 2.701615  | -1.828847 |
| Mg3  | 4.557565  | 0.232479  | -1.253347 |
| Mg4  | 4.713558  | -0.910328 | 1.581772  |
| Mg5  | 1.839547  | 4.351987  | 0.464624  |
| Mg6  | 4.117776  | -2.768874 | -0.778444 |
| Mg7  | 0.381689  | 2.047344  | 1.792814  |
| Mg8  | 1.538431  | 0.141481  | -0.502178 |
| Mg9  | 1.881914  | -0.462025 | 2.592517  |
| Mg10 | 2.794677  | -3.258083 | 1.868945  |
| Mg11 | 2.377992  | -1.549965 | -2.915599 |
| Mg12 | -1.481111 | 4.318595  | 1.182302  |
| Mg13 | -0.927078 | -0.017318 | 3.596568  |
| Mg14 | -0.323344 | 2.758144  | -1.261213 |
| Mg15 | 1.016884  | -2.975867 | -0.588030 |
| Mg16 | 0.645613  | 0.910412  | -3.406324 |
| Mg17 | -0.285866 | -2.643171 | 2.231631  |

|      |           |           |           |
|------|-----------|-----------|-----------|
| Mg18 | -1.282189 | -0.143213 | 0.221508  |
| Mg19 | -2.884318 | 1.805072  | 2.121846  |
| Mg20 | -3.374724 | 3.079706  | -0.669843 |
| Mg21 | -0.761322 | -1.668599 | -2.735626 |
| Mg22 | -3.210759 | -1.446007 | 2.205675  |
| Mg23 | -2.459851 | 0.936187  | -2.644439 |
| Mg24 | -2.053426 | -3.191644 | -0.273434 |
| Mg25 | -4.456910 | 0.287437  | -0.157373 |
| Mg26 | -3.772216 | -1.746890 | -2.324460 |
| Mg27 | -4.975365 | -2.739857 | 0.226176  |

@mg27-isomer13 bp86/6-31G(d) Etot=-5402.596295 Eb=-16.61

|      |           |           |           |
|------|-----------|-----------|-----------|
| Mg1  | 0.072760  | -0.954671 | -2.913780 |
| Mg2  | -2.981089 | 0.144410  | -2.685051 |
| Mg3  | 2.438119  | 1.138507  | -2.760575 |
| Mg4  | 2.838796  | -4.127795 | 0.216022  |
| Mg5  | 2.085635  | 3.224892  | 1.838897  |
| Mg6  | -1.604763 | -0.296912 | -0.060257 |
| Mg7  | -2.381470 | 0.984373  | 2.783126  |
| Mg8  | 4.695492  | -1.997593 | 0.930109  |
| Mg9  | 1.466784  | 3.647547  | -1.202547 |
| Mg10 | 3.732386  | 0.693407  | 1.960093  |
| Mg11 | -2.107675 | -2.885968 | -2.345552 |
| Mg12 | 4.807877  | 0.114770  | -1.133957 |
| Mg13 | -3.047090 | 3.116362  | -1.497596 |
| Mg14 | -4.514792 | -1.912484 | -0.963591 |
| Mg15 | 2.000660  | -1.927439 | 2.341559  |
| Mg16 | -0.971934 | -1.850923 | 2.613163  |
| Mg17 | 0.644212  | 0.722448  | 2.994026  |
| Mg18 | -2.557814 | -3.720483 | 0.576314  |
| Mg19 | -3.931334 | -1.458326 | 1.996065  |
| Mg20 | -0.531086 | 1.892088  | -2.463160 |
| Mg21 | 0.222790  | -2.719464 | -0.275486 |
| Mg22 | -0.705395 | 2.566870  | 0.753924  |
| Mg23 | -4.456771 | 0.949124  | 0.156428  |
| Mg24 | -3.498262 | 3.526699  | 1.475135  |
| Mg25 | 2.804826  | -1.990529 | -1.945060 |
| Mg26 | 1.361268  | 0.248797  | -0.051087 |
| Mg27 | 4.117872  | 2.872292  | -0.337160 |

@mg27-isomer14 bp86/6-31G(d) Etot=-5402.594957 Eb=-16.57

|      |           |           |           |
|------|-----------|-----------|-----------|
| Mg1  | 1.791341  | -0.381613 | -0.076868 |
| Mg2  | 3.704579  | 1.637414  | 1.349935  |
| Mg3  | 1.259805  | -2.873349 | 1.690058  |
| Mg4  | -0.151673 | 1.986159  | -0.033973 |
| Mg5  | -1.130655 | -1.716659 | 3.173758  |
| Mg6  | 3.953869  | -1.400644 | 2.037651  |
| Mg7  | -1.228005 | -0.690376 | 0.146582  |
| Mg8  | 3.080269  | 1.421785  | -2.118554 |
| Mg9  | -2.283199 | 1.020757  | -2.385228 |
| Mg10 | 0.639350  | -3.015968 | -1.403375 |
| Mg11 | 0.348971  | 2.773347  | -2.774785 |
| Mg12 | -3.891718 | -1.156794 | 1.702188  |
| Mg13 | -3.764386 | 1.732693  | 0.555702  |
| Mg14 | -2.249179 | -2.153377 | -2.351813 |
| Mg15 | -4.629443 | -0.483492 | -1.281203 |
| Mg16 | 1.318981  | 0.058010  | 2.859191  |
| Mg17 | 4.972069  | -0.529172 | -0.613623 |
| Mg18 | -1.828193 | -3.551132 | 0.804950  |
| Mg19 | 0.355160  | -0.306745 | -2.845720 |
| Mg20 | -2.486592 | 3.826691  | -1.339278 |
| Mg21 | -4.472405 | -3.292700 | -0.424206 |
| Mg22 | 3.050296  | -1.630180 | -2.655041 |
| Mg23 | -1.515562 | 1.202969  | 2.657226  |

|      |           |           |           |
|------|-----------|-----------|-----------|
| Mg24 | 2.370980  | 3.785952  | -0.391218 |
| Mg25 | -1.981978 | 3.989468  | 1.599870  |
| Mg26 | 1.194077  | 3.055887  | 2.376201  |
| Mg27 | 3.573241  | -3.308931 | -0.258428 |

@mg27-isomer15 bp86/6-31G(d) Etot=-5402.594825 Eb=-16.57

|      |           |           |           |
|------|-----------|-----------|-----------|
| Mg1  | -1.971983 | 0.000133  | -0.042618 |
| Mg2  | 0.922299  | -0.000969 | 0.054146  |
| Mg3  | 1.686860  | -1.631360 | -2.621908 |
| Mg4  | -0.965925 | -2.729279 | -1.582700 |
| Mg5  | -0.900371 | -0.001903 | -3.039252 |
| Mg6  | -1.078098 | 0.001699  | 3.128463  |
| Mg7  | 4.158093  | 2.614574  | -1.057921 |
| Mg8  | -0.965140 | 2.726895  | -1.585372 |
| Mg9  | -1.046214 | 2.652126  | 1.533005  |
| Mg10 | 3.925869  | 2.985886  | 1.871994  |
| Mg11 | 1.508115  | -1.538796 | 2.784201  |
| Mg12 | 1.510105  | 1.539115  | 2.780727  |
| Mg13 | -4.963684 | 0.000593  | -0.128462 |
| Mg14 | -3.675697 | -1.447754 | 2.440145  |
| Mg15 | 4.157558  | -2.617013 | -1.055653 |
| Mg16 | -1.047823 | -2.650001 | 1.535308  |
| Mg17 | 1.497595  | -3.359852 | 0.044857  |
| Mg18 | 3.925833  | -2.981625 | 1.875176  |
| Mg19 | -3.539580 | 1.493220  | -2.578921 |
| Mg20 | 1.498255  | 3.359932  | 0.040343  |
| Mg21 | 1.687243  | 1.627786  | -2.623398 |
| Mg22 | 4.237242  | -0.001853 | -2.416254 |
| Mg23 | -3.629038 | -3.056610 | -0.082802 |
| Mg24 | -3.674769 | 1.452270  | 2.439012  |
| Mg25 | 3.910528  | 0.000875  | 0.952048  |
| Mg26 | -3.627777 | 3.057941  | -0.085554 |
| Mg27 | -3.539495 | -1.496031 | -2.578610 |

@mg27-isomer16 bp86/6-31G(d) Etot=-5402.592741 Eb=-16.52

|      |           |           |           |
|------|-----------|-----------|-----------|
| Mg1  | -2.635699 | 3.425769  | 0.982320  |
| Mg2  | -4.534034 | -1.930592 | -0.133349 |
| Mg3  | -2.833619 | -1.553812 | 2.482216  |
| Mg4  | -2.685553 | -2.675961 | -2.392380 |
| Mg5  | 1.461692  | 0.037091  | -0.016362 |
| Mg6  | 1.668942  | 3.482071  | -0.927643 |
| Mg7  | 0.169312  | -2.801378 | 1.614523  |
| Mg8  | -1.100990 | 2.245708  | -1.450367 |
| Mg9  | 2.709370  | -1.861546 | 2.888791  |
| Mg10 | -0.719773 | -0.440928 | -3.034097 |
| Mg11 | -3.642469 | 0.243743  | -2.217062 |
| Mg12 | 5.079340  | -1.357842 | -1.680118 |
| Mg13 | 1.335104  | 1.661568  | -3.252185 |
| Mg14 | -2.513887 | 1.407956  | 3.181934  |
| Mg15 | 0.141341  | 2.363257  | 1.642536  |
| Mg16 | -1.449920 | -0.392187 | 0.091059  |
| Mg17 | 2.998059  | -2.817928 | 0.091138  |
| Mg18 | -2.334123 | -3.871062 | 0.361564  |
| Mg19 | 2.532537  | 1.122761  | 3.063185  |
| Mg20 | 3.955146  | 1.391221  | -1.673909 |
| Mg21 | -4.321595 | 0.893770  | 0.846869  |
| Mg22 | 3.777071  | 2.805274  | 1.017759  |
| Mg23 | -4.168863 | 3.041971  | -1.536765 |
| Mg24 | 4.551457  | -0.211934 | 1.112324  |
| Mg25 | -0.035183 | -0.317209 | 3.194692  |
| Mg26 | 2.366346  | -1.141901 | -2.876317 |
| Mg27 | 0.229991  | -2.747880 | -1.380356 |

@mg27-isomer17 bp86/6-31G(d) Etot=-5402.592332 Eb=-16.51

|      |           |           |           |
|------|-----------|-----------|-----------|
| Mg1  | 1.947595  | -1.308697 | 2.797225  |
| Mg2  | 4.213168  | 0.276341  | 1.260061  |
| Mg3  | 4.432709  | -2.723557 | 1.819821  |
| Mg4  | -3.301056 | -1.870975 | 2.594535  |
| Mg5  | -4.870465 | -0.879061 | 0.117151  |
| Mg6  | -0.780599 | -0.082621 | 3.087846  |
| Mg7  | -0.751675 | 0.591007  | -2.575031 |
| Mg8  | 2.032724  | -3.028477 | 0.080977  |
| Mg9  | 1.955875  | -1.077998 | -2.608881 |
| Mg10 | 1.669908  | 2.507410  | -2.086226 |
| Mg11 | -3.616653 | 3.536886  | 0.389999  |
| Mg12 | -0.573708 | -2.835332 | 1.794453  |
| Mg13 | 4.564554  | -1.922831 | -1.075604 |
| Mg14 | 1.863061  | 1.902994  | 2.463720  |
| Mg15 | -1.833289 | -0.226909 | 0.178211  |
| Mg16 | 3.758017  | 3.103179  | 0.228251  |
| Mg17 | -3.695948 | 1.413459  | -1.746151 |
| Mg18 | -3.167245 | -1.597610 | -2.288089 |
| Mg19 | -3.213851 | -3.494962 | 0.106600  |
| Mg20 | 1.144654  | 0.160407  | 0.063303  |
| Mg21 | -0.610740 | -1.861497 | -4.229823 |
| Mg22 | -0.529413 | -2.635685 | -1.321838 |
| Mg23 | -1.271000 | 3.271589  | -1.412039 |
| Mg24 | 1.136579  | 4.224685  | 0.399602  |
| Mg25 | -1.031817 | 2.517204  | 1.597406  |
| Mg26 | 4.197998  | 0.944983  | -1.848100 |
| Mg27 | -3.669382 | 1.096066  | 2.212621  |

@mg27-isomer18 bp86/6-31G(d) Etot=-5402.589285 Eb=-16.44

|      |           |           |           |
|------|-----------|-----------|-----------|
| Mg1  | 2.840212  | -0.002988 | 0.001280  |
| Mg2  | -0.001792 | 0.000536  | -0.001592 |
| Mg3  | -1.325710 | -0.995380 | 2.903949  |
| Mg4  | 1.328102  | -2.311055 | 2.012836  |
| Mg5  | 1.325936  | 0.586515  | 2.999362  |
| Mg6  | 1.326402  | -0.585868 | -3.004582 |
| Mg7  | -3.931560 | 2.907862  | 0.997183  |
| Mg8  | 1.325996  | 2.898947  | 0.993519  |
| Mg9  | 1.327367  | 2.311586  | -2.012525 |
| Mg10 | -3.929555 | 2.320723  | -2.020500 |
| Mg11 | -1.326999 | -2.017197 | -2.316490 |
| Mg12 | -1.326684 | 0.991870  | -2.894322 |
| Mg13 | -3.932233 | -0.589000 | -3.014112 |
| Mg14 | 3.931050  | -2.017458 | -2.317818 |
| Mg15 | -3.929082 | -2.321092 | 2.019923  |
| Mg16 | 1.327311  | -2.896187 | -0.994663 |
| Mg17 | -1.324760 | -2.996783 | 0.585237  |
| Mg18 | -3.929738 | -2.909420 | -0.997695 |
| Mg19 | 3.929347  | 2.019823  | 2.318014  |
| Mg20 | -1.326228 | 3.004679  | -0.585556 |
| Mg21 | -1.328172 | 2.011537  | 2.311231  |
| Mg22 | -3.932272 | 0.587171  | 3.014637  |
| Mg23 | 3.931761  | -3.016587 | 0.589312  |
| Mg24 | 3.930108  | 0.998648  | -2.905952 |
| Mg25 | -2.841999 | 0.000172  | 0.000523  |
| Mg26 | 3.931447  | 3.015863  | -0.588339 |
| Mg27 | 3.931745  | -0.996919 | 2.907139  |

@mg27-isomer19 bp86/6-31G(d) Etot=-5402.588973 Eb=-16.43

|     |           |           |           |
|-----|-----------|-----------|-----------|
| Mg1 | -4.128659 | 3.193579  | -1.886240 |
| Mg2 | 3.958266  | -1.121787 | -1.743628 |
| Mg3 | 2.003787  | 0.435866  | 0.197532  |
| Mg4 | -2.004443 | -1.052392 | 4.397203  |
| Mg5 | -1.581032 | 1.697308  | -2.635913 |
| Mg6 | 0.613671  | 2.609355  | 1.914252  |

|      |           |           |           |
|------|-----------|-----------|-----------|
| Mg7  | 3.726620  | 1.906722  | -2.121104 |
| Mg8  | -4.176434 | 0.158651  | -2.643285 |
| Mg9  | 3.457267  | 1.228507  | 2.768627  |
| Mg10 | 0.892221  | -2.391920 | 0.502747  |
| Mg11 | -4.137113 | 1.064869  | 0.267203  |
| Mg12 | -1.644858 | -1.490370 | -2.811919 |
| Mg13 | 0.852435  | 2.905511  | -1.196111 |
| Mg14 | -1.118914 | 0.009952  | -0.026304 |
| Mg15 | -1.884102 | 3.219292  | 0.121589  |
| Mg16 | 3.904741  | -1.552033 | 1.468423  |
| Mg17 | -1.800106 | -2.632045 | 1.827805  |
| Mg18 | 3.398153  | -3.900752 | -0.576674 |
| Mg19 | -1.455007 | -3.928004 | -0.893162 |
| Mg20 | -4.237302 | -0.945848 | 2.428017  |
| Mg21 | 1.013446  | 0.067445  | -2.605730 |
| Mg22 | 1.153694  | -2.914895 | -2.429355 |
| Mg23 | 0.442018  | -0.379395 | 2.752236  |
| Mg24 | 3.462953  | 3.414640  | 0.523117  |
| Mg25 | -3.734813 | -1.971896 | -0.488847 |
| Mg26 | -2.136908 | 1.422209  | 2.615007  |
| Mg27 | 5.160419  | 0.947430  | 0.274514  |

@mg27-isomer20 bp86/6-31G(d) Etot=-5402.588131 Eb=-16.42

|      |           |           |           |
|------|-----------|-----------|-----------|
| Mg1  | -1.688876 | -0.285282 | 0.122354  |
| Mg2  | 2.343436  | 0.429334  | -2.827339 |
| Mg3  | 4.686205  | -0.872249 | -1.332596 |
| Mg4  | -0.906994 | 0.958532  | -2.736490 |
| Mg5  | 3.886596  | -0.666797 | 1.713372  |
| Mg6  | -3.316784 | -3.389737 | 0.175033  |
| Mg7  | 4.510800  | -3.344477 | 0.400990  |
| Mg8  | -1.943217 | 0.303564  | 3.208622  |
| Mg9  | -0.328043 | 2.238215  | 1.481197  |
| Mg10 | 0.237639  | -1.725601 | -3.304694 |
| Mg11 | 2.572853  | 1.996515  | 2.354973  |
| Mg12 | 3.843414  | 1.847676  | -0.357490 |
| Mg13 | 0.918770  | -0.450583 | 3.009493  |
| Mg14 | -4.161028 | -1.369325 | 2.197987  |
| Mg15 | 1.298727  | -0.283566 | -0.084991 |
| Mg16 | -0.291115 | 5.527122  | -0.109760 |
| Mg17 | 0.924448  | 2.734670  | -1.253292 |
| Mg18 | -3.879424 | 1.234301  | -2.031095 |
| Mg19 | 2.490318  | -2.971459 | -1.737080 |
| Mg20 | -3.864085 | 1.602105  | 1.055838  |
| Mg21 | 2.354904  | 4.457239  | 0.779113  |
| Mg22 | -1.181148 | -2.591555 | 2.356771  |
| Mg23 | -0.382472 | -3.058489 | -0.629968 |
| Mg24 | -2.653514 | -1.621880 | -2.416671 |
| Mg25 | -2.150833 | 3.366695  | -1.002324 |
| Mg26 | 1.763923  | -2.995398 | 1.567466  |
| Mg27 | -5.084501 | -1.069570 | -0.599421 |

@mg27-isomer21 bp86/6-31G(d) Etot=-5402.576842 Eb=-16.15

|      |           |           |           |
|------|-----------|-----------|-----------|
| Mg1  | 2.347261  | -2.134146 | 3.071690  |
| Mg2  | 0.470242  | 2.535636  | 2.179305  |
| Mg3  | 0.817932  | 4.697650  | 0.005273  |
| Mg4  | -2.780162 | -1.698387 | 2.871931  |
| Mg5  | 5.293220  | 0.875537  | 0.001072  |
| Mg6  | 2.944077  | 0.661271  | -2.006019 |
| Mg7  | 4.951229  | -1.631126 | -1.530441 |
| Mg8  | 4.951359  | -1.631190 | 1.533440  |
| Mg9  | -0.278922 | -2.563843 | -1.474665 |
| Mg10 | -2.777941 | -1.690968 | -2.877423 |
| Mg11 | -3.892911 | -2.836299 | -0.004066 |
| Mg12 | 2.383526  | -2.197991 | -0.000657 |

|      |           |           |           |
|------|-----------|-----------|-----------|
| Mg13 | 2.942751  | 0.658151  | 2.005299  |
| Mg14 | -5.073077 | -0.437804 | -1.496930 |
| Mg15 | 0.470791  | 2.539504  | -2.172101 |
| Mg16 | -2.170008 | -0.412343 | -0.000331 |
| Mg17 | 0.610768  | 0.297550  | 0.000090  |
| Mg18 | -0.049452 | -0.214781 | 3.224711  |
| Mg19 | -0.279757 | -2.573091 | 1.470317  |
| Mg20 | -0.046532 | -0.207869 | -3.232835 |
| Mg21 | 2.349689  | -2.129973 | -3.074130 |
| Mg22 | -2.644412 | 1.358880  | 2.514839  |
| Mg23 | -4.442159 | 1.983821  | 0.001744  |
| Mg24 | 3.182413  | 3.020013  | 0.001063  |
| Mg25 | -2.640959 | 1.364817  | -2.510626 |
| Mg26 | -1.564593 | 2.807696  | 0.004208  |
| Mg27 | -5.074373 | -0.440716 | 1.495241  |

@mg27-isomer22 bp86/6-31G(d) Etot=-5402.576343 Eb=-16.14

|      |           |           |           |
|------|-----------|-----------|-----------|
| Mg1  | 0.002257  | -1.000122 | -2.433192 |
| Mg2  | 2.423864  | 0.870543  | -2.255516 |
| Mg3  | -1.694000 | -0.670335 | 0.182993  |
| Mg4  | 4.975376  | -0.468463 | -1.289328 |
| Mg5  | -0.223105 | 1.806430  | -0.920507 |
| Mg6  | -0.248537 | 1.159975  | 2.349778  |
| Mg7  | 2.629352  | -2.352115 | -1.871192 |
| Mg8  | 3.838965  | 2.101859  | 0.118782  |
| Mg9  | -2.860819 | 3.181975  | -1.683587 |
| Mg10 | 1.474631  | -0.482484 | 0.449299  |
| Mg11 | 2.293000  | -3.207506 | 1.578878  |
| Mg12 | 1.269880  | 3.731653  | 1.306626  |
| Mg13 | 0.069321  | -3.478611 | -0.577761 |
| Mg14 | -3.981788 | -1.837406 | 1.968017  |
| Mg15 | -0.702798 | -2.510521 | 2.224081  |
| Mg16 | 4.335790  | -0.759147 | 1.659849  |
| Mg17 | -2.304815 | -2.892921 | -2.388275 |
| Mg18 | 1.986034  | 3.897598  | -1.631201 |
| Mg19 | -4.712687 | -1.914654 | -0.956148 |
| Mg20 | -4.340725 | 1.069941  | 0.100530  |
| Mg21 | -2.913052 | 0.198479  | -2.432289 |
| Mg22 | 4.813595  | -3.263186 | 0.001487  |
| Mg23 | -0.633586 | 5.216881  | -0.703447 |
| Mg24 | -3.147032 | 0.892666  | 2.847547  |
| Mg25 | -2.182120 | 3.236487  | 1.238187  |
| Mg26 | -2.838100 | -4.030075 | 0.364789  |
| Mg27 | 2.671099  | 1.503057  | 2.751597  |

@mg27-isomer23 bp86/6-31G(d) Etot=-5402.575680 Eb=-16.13

|      |           |           |           |
|------|-----------|-----------|-----------|
| Mg1  | 1.035998  | 2.709392  | -0.516907 |
| Mg2  | -1.125126 | 2.060397  | -2.593843 |
| Mg3  | -1.145306 | 0.347537  | 0.157027  |
| Mg4  | 2.932738  | 1.759532  | 1.737354  |
| Mg5  | -3.834679 | 1.743910  | -0.908792 |
| Mg6  | 4.030042  | 1.663447  | -1.148676 |
| Mg7  | 3.515738  | -0.981649 | -2.796886 |
| Mg8  | -3.257435 | -0.039567 | -3.316275 |
| Mg9  | -4.088906 | -0.242225 | 1.387739  |
| Mg10 | -2.627898 | -2.096922 | -1.241701 |
| Mg11 | -1.686203 | 3.669299  | 0.020545  |
| Mg12 | 1.257887  | -3.187861 | 2.056609  |
| Mg13 | 0.696221  | -0.318647 | 2.640817  |
| Mg14 | 1.762625  | -0.317104 | -0.296006 |
| Mg15 | 5.499465  | -1.003049 | -0.566869 |
| Mg16 | -4.852111 | -3.035190 | 0.688080  |
| Mg17 | 3.326068  | -3.005765 | -0.452935 |
| Mg18 | -3.403361 | 2.657591  | 2.175372  |



|      |           |           |           |
|------|-----------|-----------|-----------|
| Mg19 | 1.748390  | 1.486398  | -3.225525 |
| Mg20 | -2.005662 | 0.408253  | 3.479920  |
| Mg21 | 5.888251  | 1.195059  | 1.306317  |
| Mg22 | 0.139702  | -2.907884 | -0.657629 |
| Mg23 | -0.220405 | -0.824751 | -2.797431 |
| Mg24 | -5.521167 | -0.894121 | -1.278766 |
| Mg25 | -1.664608 | -2.291321 | 1.742575  |
| Mg26 | 3.807076  | -1.165843 | 1.978172  |
| Mg27 | -0.207334 | 2.611081  | 2.427715  |

@mg27-isomer24 bp86/6-31G(d) Etot=-5402.573075 Eb=-16.07

|      |           |           |           |
|------|-----------|-----------|-----------|
| Mg1  | -0.715938 | -0.960561 | 3.809749  |
| Mg2  | -0.764371 | 2.138017  | -1.098975 |
| Mg3  | 2.004191  | 0.550793  | -1.086011 |
| Mg4  | 1.725550  | 0.352883  | 2.002864  |
| Mg5  | 1.425823  | -2.657964 | 2.579705  |
| Mg6  | -3.135099 | 0.088826  | -0.501201 |
| Mg7  | 0.659900  | 3.266596  | 1.463459  |
| Mg8  | 1.111423  | -4.058462 | 0.003445  |
| Mg9  | -4.464221 | 1.867966  | 1.677397  |
| Mg10 | -4.243008 | 3.130338  | -1.165862 |
| Mg11 | 4.666794  | -0.698481 | -1.886184 |
| Mg12 | -0.389007 | -0.344785 | -2.883389 |
| Mg13 | 2.129749  | 3.561705  | -1.221597 |
| Mg14 | -0.833996 | -3.315231 | -2.242251 |
| Mg15 | -3.188716 | -1.707080 | -3.003096 |
| Mg16 | 5.092285  | 0.245767  | 1.094124  |
| Mg17 | 3.677410  | 2.859122  | 1.414141  |
| Mg18 | 3.392532  | -2.150422 | 0.466943  |
| Mg19 | -2.339436 | 4.002202  | 0.913979  |
| Mg20 | 1.977711  | -2.229151 | -2.321441 |
| Mg21 | -3.373230 | -1.104054 | 2.291209  |
| Mg22 | 4.908348  | 2.223710  | -1.242411 |
| Mg23 | -3.127002 | -3.006079 | -0.259502 |
| Mg24 | -1.430292 | 1.239904  | 1.979304  |
| Mg25 | -2.942232 | 1.344443  | -3.162548 |
| Mg26 | -0.326329 | -1.154347 | 0.209927  |
| Mg27 | -1.498839 | -3.485656 | 2.168222  |

@mg27-isomer25 bp86/6-31G(d) Etot=-5402.572731 Eb=-16.06

|      |           |           |           |
|------|-----------|-----------|-----------|
| Mg1  | 4.132270  | 2.951698  | 0.920367  |
| Mg2  | -3.413463 | 1.253238  | 1.802820  |
| Mg3  | -4.532190 | 2.301707  | -0.844374 |
| Mg4  | -0.372876 | -5.435173 | -0.137785 |
| Mg5  | -1.517008 | 3.158242  | -0.813480 |
| Mg6  | 4.148886  | -2.125029 | -0.375143 |
| Mg7  | -2.900328 | -3.686828 | 0.039061  |
| Mg8  | -3.203134 | -1.674226 | 2.222816  |
| Mg9  | 4.502202  | 0.037240  | 1.875629  |
| Mg10 | 1.990719  | 1.617422  | 2.951373  |
| Mg11 | -3.432385 | 4.274576  | 1.267412  |
| Mg12 | -0.687486 | -0.032810 | 3.057267  |
| Mg13 | -4.265079 | -0.728866 | -0.494525 |
| Mg14 | 3.376831  | 2.909204  | -2.046208 |
| Mg15 | 1.693705  | -0.955460 | 1.333524  |
| Mg16 | 0.446152  | -2.467206 | -1.154812 |
| Mg17 | -2.360603 | -2.126738 | -2.373190 |
| Mg18 | 1.238965  | 2.040531  | 0.039525  |
| Mg19 | 5.164890  | 0.690910  | -0.994871 |
| Mg20 | 2.231455  | -4.118003 | 0.949165  |
| Mg21 | -0.080714 | -0.713177 | -3.699621 |
| Mg22 | 0.404474  | 2.047516  | -2.890178 |
| Mg23 | -1.122182 | -0.024452 | -0.070070 |
| Mg24 | 2.373812  | -0.146599 | -1.951514 |

|      |           |           |           |
|------|-----------|-----------|-----------|
| Mg25 | -0.828296 | 2.863979  | 2.189357  |
| Mg26 | -0.486762 | -2.887017 | 1.893997  |
| Mg27 | -2.501855 | 0.975322  | -2.696540 |

@mg27-isomer26 bp86/6-31G(d) Etot=-5402.571851 Eb=-16.04

|      |           |           |           |
|------|-----------|-----------|-----------|
| Mg1  | 1.669617  | 0.069768  | 0.121605  |
| Mg2  | 2.368461  | -0.824381 | 3.060246  |
| Mg3  | 2.929265  | 2.289157  | 1.808037  |
| Mg4  | -2.305574 | 1.763683  | 1.579480  |
| Mg5  | 1.856179  | 2.801568  | -1.160059 |
| Mg6  | 0.543203  | -2.944086 | -0.250271 |
| Mg7  | -0.823797 | -2.113233 | -2.865436 |
| Mg8  | 4.912474  | 0.007987  | 1.713104  |
| Mg9  | -1.163071 | 2.593224  | -1.285751 |
| Mg10 | 1.234903  | -3.617142 | 2.562532  |
| Mg11 | -0.651017 | -1.292855 | 2.256579  |
| Mg12 | -3.995466 | -1.625734 | -1.639717 |
| Mg13 | 3.432812  | -2.496284 | 0.688454  |
| Mg14 | 0.127253  | 3.633945  | 1.204670  |
| Mg15 | 2.282833  | -1.766218 | -2.353611 |
| Mg16 | -6.752581 | -0.149336 | 0.264842  |
| Mg17 | -3.923543 | -0.896281 | 1.433278  |
| Mg18 | -5.326279 | 1.912606  | 1.947295  |
| Mg19 | -1.258486 | -0.269948 | -0.462104 |
| Mg20 | 4.978563  | -0.798920 | -1.191713 |
| Mg21 | 3.490264  | 0.990905  | -2.973807 |
| Mg22 | -4.166906 | 1.397976  | -0.938966 |
| Mg23 | 0.490582  | 0.651501  | -3.078292 |
| Mg24 | -2.646117 | 0.435789  | -3.311728 |
| Mg25 | 0.300508  | 1.394441  | 3.063528  |
| Mg26 | 4.840400  | 2.110490  | -0.483208 |
| Mg27 | -2.444480 | -3.258620 | 0.291011  |

@mg27-isomer27 bp86/6-31G(d) Etot=-5402.567754 Eb=-15.94

|      |           |           |           |
|------|-----------|-----------|-----------|
| Mg1  | 0.579348  | 1.005746  | -3.000799 |
| Mg2  | -2.876228 | 0.773734  | -2.639192 |
| Mg3  | -1.375325 | -4.227880 | -0.709714 |
| Mg4  | 4.637290  | 1.285517  | -0.479044 |
| Mg5  | 2.010299  | 2.823262  | -0.983141 |
| Mg6  | 1.613705  | -0.138246 | -0.241970 |
| Mg7  | 2.127963  | -1.734683 | -3.212798 |
| Mg8  | -0.945305 | 3.390515  | -1.558908 |
| Mg9  | 0.153606  | 3.204444  | 1.440713  |
| Mg10 | 4.159542  | -1.752121 | -0.945441 |
| Mg11 | -2.985409 | 3.425350  | 1.216059  |
| Mg12 | -4.122215 | -4.276601 | 0.464196  |
| Mg13 | -4.557131 | 0.932013  | 0.348267  |
| Mg14 | 0.442535  | 0.393149  | 2.763925  |
| Mg15 | -1.257359 | 0.777002  | 0.062021  |
| Mg16 | 3.681450  | 0.725556  | -3.141856 |
| Mg17 | -4.126899 | -1.633330 | 2.007912  |
| Mg18 | 2.875705  | 2.043452  | 1.882921  |
| Mg19 | -4.081456 | 3.254249  | -1.519377 |
| Mg20 | 4.835031  | -0.500512 | 1.833548  |
| Mg21 | -0.825840 | -1.998442 | 1.302457  |
| Mg22 | 3.048593  | -0.009135 | 4.130082  |
| Mg23 | 2.280303  | -2.078601 | 1.975866  |
| Mg24 | 1.536963  | -3.345403 | -0.740674 |
| Mg25 | -0.640073 | -1.554739 | -2.043709 |
| Mg26 | -2.684261 | 0.832130  | 2.766617  |
| Mg27 | -3.504833 | -1.616427 | -0.977961 |

@mg27-isomer28 bp86/6-31G(d) Etot=-5402.564542 Eb=-15.87

|     |           |           |          |
|-----|-----------|-----------|----------|
| Mg1 | -0.992607 | -0.717800 | 0.525783 |
|-----|-----------|-----------|----------|

|      |           |           |           |
|------|-----------|-----------|-----------|
| Mg2  | 1.902239  | 0.089285  | -0.005533 |
| Mg3  | 0.908491  | -0.266479 | 3.225827  |
| Mg4  | -1.541175 | -3.112282 | -1.307634 |
| Mg5  | 1.498056  | -3.107153 | -0.824438 |
| Mg6  | -2.344156 | 0.014095  | 3.100667  |
| Mg7  | -2.653279 | -0.217982 | -2.089804 |
| Mg8  | 2.581930  | -2.430317 | 1.929314  |
| Mg9  | 2.549577  | 2.175964  | 2.431585  |
| Mg10 | -3.351342 | 2.201598  | 1.095788  |
| Mg11 | 0.273168  | -0.922649 | -2.616721 |
| Mg12 | 4.979558  | 0.205586  | -1.594076 |
| Mg13 | -0.370482 | 2.236043  | 2.021609  |
| Mg14 | 4.037392  | 2.626132  | -0.185776 |
| Mg15 | -4.369392 | -0.502588 | 1.011223  |
| Mg16 | -0.192101 | -3.362884 | 1.836990  |
| Mg17 | -4.490336 | -2.578239 | -1.127541 |
| Mg18 | -1.717160 | 4.426260  | 0.034795  |
| Mg19 | 4.426966  | -0.025322 | 1.585818  |
| Mg20 | -0.520208 | 1.777713  | -1.065265 |
| Mg21 | 4.463568  | -2.491544 | -0.418366 |
| Mg22 | 1.404279  | 3.824225  | 0.033534  |
| Mg23 | 2.423987  | 1.533951  | -2.619477 |
| Mg24 | -5.424898 | 0.497094  | -1.734453 |
| Mg25 | 3.107214  | -1.597258 | -2.968472 |
| Mg26 | -3.165599 | -3.101414 | 1.640151  |
| Mg27 | -3.423691 | 2.825963  | -1.915528 |

@mg27-isomer29 bp86/6-31G(d) Etot=-5402.552698 Eb=-15.59

|      |           |           |           |
|------|-----------|-----------|-----------|
| Mg1  | 4.476478  | 1.267547  | 2.242259  |
| Mg2  | 1.231230  | -1.476267 | -3.596794 |
| Mg3  | 5.031218  | -0.719684 | 0.130602  |
| Mg4  | -3.403988 | -0.259715 | 2.688116  |
| Mg5  | -0.274434 | -3.376314 | -1.825236 |
| Mg6  | 4.342469  | 2.078594  | -0.774890 |
| Mg7  | 1.608266  | 0.811938  | -1.806191 |
| Mg8  | -1.562984 | -0.542811 | -2.516463 |
| Mg9  | -3.680385 | 1.972815  | -2.080252 |
| Mg10 | 1.715480  | 1.658082  | 0.996478  |
| Mg11 | -3.849030 | -0.520231 | -0.304987 |
| Mg12 | -0.956089 | 1.544577  | 2.388096  |
| Mg13 | -0.422314 | -1.421643 | 3.312340  |
| Mg14 | 2.521913  | -2.280760 | -0.936332 |
| Mg15 | -3.348361 | -3.178603 | -1.582929 |
| Mg16 | 1.899428  | 3.901478  | -1.109135 |
| Mg17 | 1.590180  | 0.803219  | 3.916076  |
| Mg18 | -0.886040 | 5.013576  | -0.483906 |
| Mg19 | -0.987472 | 1.992770  | -0.681939 |
| Mg20 | 0.523802  | -3.634397 | 1.153746  |
| Mg21 | 2.511050  | -1.291415 | 1.832436  |
| Mg22 | -3.921847 | 4.812234  | -0.771831 |
| Mg23 | -0.303901 | -0.816736 | 0.237136  |
| Mg24 | -2.599042 | -2.808834 | 1.333373  |
| Mg25 | -1.809783 | -5.330037 | -0.009548 |
| Mg26 | -3.664503 | 2.267743  | 0.967605  |
| Mg27 | 4.218661  | -0.467125 | -2.717831 |

@mg27-isomer30 bp86/6-31G(d) Etot=-5402.551631 Eb=-15.57

|     |           |           |           |
|-----|-----------|-----------|-----------|
| Mg1 | -0.354108 | 0.341075  | -0.361918 |
| Mg2 | -0.654871 | -2.683101 | -1.473189 |
| Mg3 | 0.329618  | 2.990371  | 1.625090  |
| Mg4 | -2.731552 | -0.880301 | -3.098034 |
| Mg5 | -0.211502 | -5.911552 | -0.173853 |
| Mg6 | 0.108453  | 0.254348  | 3.054145  |
| Mg7 | 2.641262  | 3.505611  | -0.405723 |

|      |           |           |           |
|------|-----------|-----------|-----------|
| Mg8  | -2.386056 | 1.259826  | 1.810360  |
| Mg9  | 2.371573  | 0.622935  | 1.190713  |
| Mg10 | -0.401044 | 3.386006  | -1.211286 |
| Mg11 | -2.164354 | -4.034366 | 0.960239  |
| Mg12 | 2.126545  | -1.287645 | -1.344681 |
| Mg13 | -3.025425 | -1.243318 | -0.125210 |
| Mg14 | 2.215555  | -4.212926 | -0.358610 |
| Mg15 | -1.268991 | 1.680773  | -3.642088 |
| Mg16 | 4.027789  | -2.038941 | 0.827028  |
| Mg17 | 1.645460  | 1.561446  | -2.494722 |
| Mg18 | -5.175747 | 2.405926  | 1.068460  |
| Mg19 | 5.753985  | 0.031831  | 1.956376  |
| Mg20 | -2.568677 | 4.097044  | 0.769759  |
| Mg21 | -5.037611 | -0.475392 | 2.086522  |
| Mg22 | 4.351402  | 0.936632  | -1.047174 |
| Mg23 | -2.194785 | -1.660744 | 2.783037  |
| Mg24 | -3.119399 | 1.657081  | -1.270131 |
| Mg25 | 4.953489  | 2.817135  | 1.330586  |
| Mg26 | 0.200160  | -0.934823 | -3.792865 |
| Mg27 | 0.568831  | -2.184928 | 1.337169  |

@mg27-isomer31 bp86/6-31G(d) Etot=-5402.545637 Eb=-15.43

|      |           |           |           |
|------|-----------|-----------|-----------|
| Mg1  | -3.351113 | -1.824506 | -0.399036 |
| Mg2  | 1.970866  | -1.550462 | -2.363950 |
| Mg3  | 4.220225  | -2.204510 | -0.487173 |
| Mg4  | -1.657899 | 0.895414  | 3.385382  |
| Mg5  | 1.986789  | -1.983092 | 1.523019  |
| Mg6  | -0.267313 | -1.760028 | 3.550429  |
| Mg7  | -0.912041 | -3.390155 | 1.007737  |
| Mg8  | -3.498049 | 1.460575  | 1.103938  |
| Mg9  | 6.658234  | -0.141198 | -0.276809 |
| Mg10 | 4.049954  | 0.245489  | 1.602373  |
| Mg11 | -0.429070 | -0.402154 | -3.776249 |
| Mg12 | -0.572393 | 2.638460  | 1.142904  |
| Mg13 | 1.293915  | 0.823460  | 2.696970  |
| Mg14 | -0.713746 | -0.383027 | 0.428798  |
| Mg15 | 2.477799  | 2.721728  | 0.537130  |
| Mg16 | -5.001142 | 0.684425  | -1.434300 |
| Mg17 | -0.859582 | -2.735835 | -1.962902 |
| Mg18 | -5.682042 | -0.528076 | 1.292363  |
| Mg19 | 0.856308  | 1.335645  | -1.658498 |
| Mg20 | -2.135784 | 1.334913  | -1.736051 |
| Mg21 | 1.695109  | -4.110861 | -0.625537 |
| Mg22 | -3.087311 | 4.145199  | -0.485825 |
| Mg23 | -3.124440 | -1.612153 | 2.546456  |
| Mg24 | 5.598670  | 2.625762  | 0.349486  |
| Mg25 | -0.060716 | 4.210019  | -1.260287 |
| Mg26 | 3.847567  | 0.677434  | -1.437461 |
| Mg27 | -3.302793 | -1.172465 | -3.262907 |

@mg27-isomer32 bp86/6-31G(d) Etot=-5402.534974 Eb=-15.18

|      |           |           |           |
|------|-----------|-----------|-----------|
| Mg1  | -0.167621 | 0.672811  | 0.230063  |
| Mg2  | 1.762015  | -3.172378 | 1.233455  |
| Mg3  | -2.417602 | 1.473156  | -1.773082 |
| Mg4  | 1.646621  | 2.770219  | 1.762973  |
| Mg5  | 4.469375  | -1.739906 | 1.342762  |
| Mg6  | -0.625856 | -2.317217 | -0.444532 |
| Mg7  | 1.623397  | 1.755821  | -2.267432 |
| Mg8  | -3.521864 | -3.465298 | 0.623662  |
| Mg9  | 2.169795  | -0.157740 | 2.304373  |
| Mg10 | 3.800405  | 1.342829  | 0.198645  |
| Mg11 | 6.346189  | -0.494826 | -0.645420 |
| Mg12 | -0.293211 | -0.492566 | -2.884823 |
| Mg13 | -5.622300 | -1.491262 | -0.463617 |

|      |           |           |           |
|------|-----------|-----------|-----------|
| Mg14 | -0.720995 | 1.238033  | 3.281486  |
| Mg15 | -0.619261 | -1.731328 | 2.735885  |
| Mg16 | -0.306028 | 3.603389  | -0.686386 |
| Mg17 | -2.778254 | 2.565819  | 1.053195  |
| Mg18 | -2.910066 | -0.456100 | 0.942934  |
| Mg19 | -0.908181 | 4.180701  | 2.637710  |
| Mg20 | -2.960632 | -1.608541 | -2.133762 |
| Mg21 | -5.348286 | 1.434015  | -0.060461 |
| Mg22 | 4.193689  | 0.099422  | -2.721241 |
| Mg23 | -1.033441 | -4.643045 | 1.727917  |
| Mg24 | 2.670681  | 4.150040  | -0.703354 |
| Mg25 | 2.081165  | -1.038344 | -0.940480 |
| Mg26 | 4.627005  | -2.827315 | -1.529444 |
| Mg27 | -5.156739 | 0.349611  | -2.821028 |

@mg27-isomer33 bp86/6-31G(d) Etot=-5402.525785 Eb=-14.97

|      |           |           |           |
|------|-----------|-----------|-----------|
| Mg1  | 1.500759  | -0.449281 | -2.030727 |
| Mg2  | 2.211022  | -2.219687 | 0.826045  |
| Mg3  | 2.257813  | -3.437524 | -1.900685 |
| Mg4  | -2.881717 | -0.129704 | -1.264798 |
| Mg5  | 2.335741  | 2.678119  | 2.285638  |
| Mg6  | 4.507926  | -1.520273 | -1.264310 |
| Mg7  | 3.874173  | 0.256987  | 1.228754  |
| Mg8  | -0.765760 | 2.254663  | -1.759728 |
| Mg9  | -0.309808 | 0.154228  | 0.441647  |
| Mg10 | 4.364269  | 1.321799  | -2.592386 |
| Mg11 | -0.583600 | -2.500018 | 2.112371  |
| Mg12 | 1.187060  | -5.176370 | 0.360829  |
| Mg13 | -0.575842 | -2.622127 | -1.046503 |
| Mg14 | -3.154765 | -2.591435 | 0.564855  |
| Mg15 | -2.678212 | 3.002940  | 0.757371  |
| Mg16 | -3.173067 | 0.204432  | 1.906882  |
| Mg17 | 6.476064  | 0.682837  | -0.703486 |
| Mg18 | -3.672646 | 2.873895  | -2.177708 |
| Mg19 | 0.148323  | 4.065925  | 0.702392  |
| Mg20 | -5.632345 | -1.104137 | -0.075196 |
| Mg21 | -1.690900 | -5.258743 | 0.510497  |
| Mg22 | -0.770833 | 1.961493  | 2.979153  |
| Mg23 | -5.752121 | 0.709040  | -2.502914 |
| Mg24 | 1.398163  | -0.198074 | 2.961479  |
| Mg25 | -5.356262 | 1.876991  | 0.197561  |
| Mg26 | 2.016807  | 2.132539  | -0.660315 |
| Mg27 | 4.719756  | 3.031486  | 0.143280  |

@mg27-isomer34 bp86/6-31G(d) Etot=-5402.524175 Eb=-14.93

|      |           |           |           |
|------|-----------|-----------|-----------|
| Mg1  | -0.382839 | -0.560149 | 0.984729  |
| Mg2  | -0.852427 | 1.996090  | -1.859929 |
| Mg3  | -2.979597 | 1.189874  | 1.409142  |
| Mg4  | 1.844799  | -3.241209 | -1.209221 |
| Mg5  | -0.214635 | 2.489308  | 1.691236  |
| Mg6  | -1.938899 | 4.168311  | -0.127294 |
| Mg7  | -2.697312 | -0.507110 | -1.220476 |
| Mg8  | -4.029313 | 2.244625  | -1.386148 |
| Mg9  | 4.674479  | 1.255605  | 1.099141  |
| Mg10 | 6.371480  | -1.503851 | 1.182509  |
| Mg11 | -3.148573 | -2.098905 | 1.436508  |
| Mg12 | 1.282992  | 4.183603  | -0.917123 |
| Mg13 | -5.005715 | -0.442719 | 3.147072  |
| Mg14 | 1.944578  | 0.603351  | 2.733287  |
| Mg15 | -5.947536 | 1.060760  | 0.637439  |
| Mg16 | -1.155962 | -3.228274 | -0.836013 |
| Mg17 | 4.057245  | 2.689141  | -1.478766 |
| Mg18 | 0.247478  | -0.745440 | -2.166038 |
| Mg19 | 1.730299  | 1.190294  | -0.325877 |

|      |           |           |           |
|------|-----------|-----------|-----------|
| Mg20 | 5.030535  | -2.814833 | -1.139960 |
| Mg21 | -5.650316 | -0.414158 | -1.982190 |
| Mg22 | 6.073885  | 0.227605  | -1.372262 |
| Mg23 | -4.278601 | -3.116233 | -1.245038 |
| Mg24 | -6.165040 | -1.945467 | 0.751906  |
| Mg25 | 3.324572  | -0.546324 | -2.211257 |
| Mg26 | 4.737769  | -0.594732 | 3.480703  |
| Mg27 | 3.126656  | -1.539163 | 0.923921  |

@mg27-isomer35 bp86/6-31G(d) Etot=-5402.518881 Eb=-14.81

|      |           |           |           |
|------|-----------|-----------|-----------|
| Mg1  | -1.439725 | 0.344976  | -0.441367 |
| Mg2  | 0.873962  | -0.078782 | -2.753550 |
| Mg3  | -0.762574 | 5.102563  | -0.051680 |
| Mg4  | -1.643829 | -2.142152 | -2.211107 |
| Mg5  | -0.531938 | 2.635351  | 1.698873  |
| Mg6  | -3.226009 | 0.856127  | 1.933298  |
| Mg7  | 2.070284  | 3.797357  | 0.374684  |
| Mg8  | -0.322469 | -0.448596 | 2.298412  |
| Mg9  | 0.490545  | -2.257070 | -0.005515 |
| Mg10 | 3.709455  | 1.914357  | -1.499028 |
| Mg11 | 1.564654  | 0.668341  | 0.201658  |
| Mg12 | 1.329406  | -3.055957 | -2.826720 |
| Mg13 | -4.548497 | -1.529121 | -1.481677 |
| Mg14 | 5.312745  | -2.595973 | 0.782844  |
| Mg15 | 5.903089  | 0.232284  | -0.041755 |
| Mg16 | -2.933466 | 3.070019  | -0.420059 |
| Mg17 | 3.013467  | -4.066056 | -0.471755 |
| Mg18 | -5.277538 | 1.141109  | -0.419662 |
| Mg19 | 3.517915  | -1.183017 | -1.413617 |
| Mg20 | -5.511172 | -1.131457 | 1.501206  |
| Mg21 | 0.059494  | 2.731249  | -1.883254 |
| Mg22 | 2.708650  | -1.429354 | 1.966642  |
| Mg23 | -3.134990 | 0.929424  | -2.770734 |
| Mg24 | -2.621730 | -2.143236 | 0.816452  |
| Mg25 | -8.065428 | -2.659037 | 2.471510  |
| Mg26 | 5.494682  | -0.527285 | 2.954598  |
| Mg27 | 3.971014  | 1.823935  | 1.691305  |

@mg28-isomer01 bp86/6-31G(d) Etot=-5602.717408 Eb=-17.16

|      |           |           |           |
|------|-----------|-----------|-----------|
| Mg1  | -2.054797 | 0.001783  | 0.001176  |
| Mg2  | 0.804691  | -0.008693 | -0.008744 |
| Mg3  | 1.391237  | -1.572630 | 2.740203  |
| Mg4  | -1.164240 | 0.014378  | 3.131776  |
| Mg5  | -1.181219 | -2.717740 | 1.589433  |
| Mg6  | -1.162501 | 2.698645  | -1.572729 |
| Mg7  | 3.915112  | -2.675414 | -1.525127 |
| Mg8  | -1.168511 | -2.700904 | -1.543062 |
| Mg9  | -1.171741 | -0.009279 | -3.125605 |
| Mg10 | 3.931453  | -0.018742 | -3.069706 |
| Mg11 | 1.401654  | 3.165320  | -0.021013 |
| Mg12 | 1.389639  | 1.582966  | -2.779624 |
| Mg13 | 3.945229  | 2.655615  | -1.558259 |
| Mg14 | -5.015211 | 0.010982  | 0.008611  |
| Mg15 | -3.765688 | 2.978553  | -0.004897 |
| Mg16 | 3.946327  | 0.006604  | 3.078671  |
| Mg17 | -1.152428 | 2.700737  | 1.547428  |
| Mg18 | 1.405161  | 1.607368  | 2.757942  |
| Mg19 | 3.946867  | 2.678768  | 1.533453  |
| Mg20 | -3.776813 | -2.955925 | 0.012665  |
| Mg21 | 1.381926  | -1.612931 | -2.773445 |
| Mg22 | 1.381390  | -3.196958 | 0.015740  |
| Mg23 | 3.938675  | -2.670663 | 1.542944  |
| Mg24 | -3.767815 | 1.500868  | 2.557103  |
| Mg25 | -3.775340 | 1.473763  | -2.559364 |

|      |           |           |           |
|------|-----------|-----------|-----------|
| Mg26 | 3.931082  | 0.008328  | 0.008322  |
| Mg27 | -3.780813 | -1.485135 | -2.551078 |
| Mg28 | -3.773322 | -1.459663 | 2.567187  |

@mg28-isomer02 bp86/6-31G(d) Etot=-5602.713802 Eb=-17.08

|      |           |           |           |
|------|-----------|-----------|-----------|
| Mg1  | 1.591081  | -0.084548 | -0.199258 |
| Mg2  | -1.330338 | 0.455235  | 0.219716  |
| Mg3  | -1.294481 | 2.589742  | -2.065195 |
| Mg4  | 1.485320  | 1.439605  | -3.036954 |
| Mg5  | 1.120610  | 3.108763  | -0.367420 |
| Mg6  | 1.434112  | -3.594244 | 0.241948  |
| Mg7  | -4.030297 | 1.560507  | 2.212343  |
| Mg8  | 0.853192  | 1.962037  | 2.393347  |
| Mg9  | 0.374409  | -1.165961 | 2.393479  |
| Mg10 | -2.994136 | -1.337723 | 2.428713  |
| Mg11 | -0.910157 | -2.281527 | -0.932325 |
| Mg12 | -1.209990 | -3.698464 | 1.787666  |
| Mg13 | -3.684042 | -3.245535 | 0.147006  |
| Mg14 | 4.712153  | 0.097169  | 0.390494  |
| Mg15 | 3.944020  | -2.590688 | -0.966711 |
| Mg16 | -3.769590 | 1.004271  | -2.949226 |
| Mg17 | 1.565922  | -1.906297 | -2.752865 |
| Mg18 | -0.980185 | -0.238233 | -3.123628 |
| Mg19 | -3.478394 | -1.940193 | -2.571432 |
| Mg20 | 3.590882  | 2.784893  | 1.470666  |
| Mg21 | -1.573165 | 0.987502  | 3.673360  |
| Mg22 | -1.613404 | 3.318643  | 1.299743  |
| Mg23 | -3.946052 | 2.741092  | -0.547968 |
| Mg24 | 4.072380  | -0.181862 | -2.689532 |
| Mg25 | 3.408381  | -2.310324 | 2.009280  |
| Mg26 | -4.449552 | -0.288562 | -0.187755 |
| Mg27 | 3.200655  | 0.338737  | 3.178769  |
| Mg28 | 3.910668  | 2.475963  | -1.456262 |

@mg28-isomer03 bp86/6-31G(d) Etot=-5602.712447 Eb=-17.05

|      |           |           |           |
|------|-----------|-----------|-----------|
| Mg1  | -1.408018 | -0.536754 | 0.111844  |
| Mg2  | 1.537598  | -0.000259 | -0.080036 |
| Mg3  | 1.347666  | 0.226378  | -3.341852 |
| Mg4  | -1.511506 | -1.051431 | -3.229424 |
| Mg5  | -0.878743 | 1.690208  | -1.883487 |
| Mg6  | -4.249230 | -2.236680 | 1.091773  |
| Mg7  | 4.280438  | 2.354453  | 0.501057  |
| Mg8  | -0.696507 | 3.907399  | 0.243281  |
| Mg9  | -0.220317 | 1.545451  | 2.042998  |
| Mg10 | 2.843346  | 0.852482  | 2.752476  |
| Mg11 | 0.586178  | -2.955475 | 0.998708  |
| Mg12 | 0.371625  | -1.030814 | 3.321896  |
| Mg13 | 3.154627  | -2.097422 | 2.523477  |
| Mg14 | -3.045079 | 2.792235  | 1.969507  |
| Mg15 | -4.406728 | 0.648648  | 0.191000  |
| Mg16 | 3.686802  | -1.662096 | -2.637526 |
| Mg17 | -4.205987 | -1.711254 | -1.861544 |
| Mg18 | 0.799262  | -2.459704 | -1.975742 |
| Mg19 | 3.314401  | -3.316589 | -0.240769 |
| Mg20 | -3.383942 | 3.311781  | -0.976952 |
| Mg21 | 1.968522  | 3.601740  | 1.759254  |
| Mg22 | 1.837502  | 2.930668  | -1.315015 |
| Mg23 | 4.106042  | 1.163074  | -2.235206 |
| Mg24 | -3.716415 | 1.000617  | -2.827808 |
| Mg25 | -2.839002 | -0.072742 | 2.932515  |
| Mg26 | 4.634758  | -0.629798 | 0.239765  |
| Mg27 | -2.000623 | -3.372543 | -0.717955 |
| Mg28 | -1.906670 | -2.891574 | 2.643765  |

@mg28-isomer04 bp86/6-31G(d) Etot=-5602.711481 Eb=-17.03

|      |           |           |           |
|------|-----------|-----------|-----------|
| Mg1  | -3.737854 | 0.439108  | -2.972955 |
| Mg2  | -4.254458 | -2.107582 | -1.487133 |
| Mg3  | -1.556587 | -1.629908 | -2.923369 |
| Mg4  | -2.062079 | -3.547233 | -0.029334 |
| Mg5  | -4.259645 | 0.629326  | 0.040793  |
| Mg6  | -4.275338 | -2.052846 | 1.510042  |
| Mg7  | -0.933377 | 1.303402  | -1.969330 |
| Mg8  | -1.909045 | -2.364423 | 3.139794  |
| Mg9  | 0.740000  | -2.815444 | -1.448869 |
| Mg10 | -1.330370 | -0.681383 | 0.269000  |
| Mg11 | 1.267207  | -0.331257 | -3.287391 |
| Mg12 | -3.374753 | 3.114577  | -1.611029 |
| Mg13 | 1.827971  | 2.596424  | -1.657173 |
| Mg14 | -0.178494 | 1.874147  | 1.413511  |
| Mg15 | -2.841088 | 0.469422  | 2.835525  |
| Mg16 | 1.684317  | -0.155322 | -0.074786 |
| Mg17 | 3.574236  | -2.143625 | -2.439009 |
| Mg18 | 0.644922  | -2.739386 | 1.616997  |
| Mg19 | 2.037574  | 3.998808  | 1.024523  |
| Mg20 | 4.073196  | 0.754291  | -2.383039 |
| Mg21 | -0.710934 | 4.063440  | -0.569354 |
| Mg22 | 0.315251  | -0.329892 | 3.388361  |
| Mg23 | 4.098018  | 1.885322  | 0.477601  |
| Mg24 | 3.310079  | -3.229587 | 0.328610  |
| Mg25 | -3.006767 | 3.156941  | 1.390544  |
| Mg26 | 5.058209  | -0.896511 | -0.079528 |
| Mg27 | 2.460151  | 1.768566  | 3.003002  |
| Mg28 | 3.339657  | -1.029372 | 2.493994  |

@mg28-isomer05 bp86/6-31G(d) Etot=-5602.711432 Eb=-17.03

|      |           |           |           |
|------|-----------|-----------|-----------|
| Mg1  | 1.424638  | 0.000034  | -0.073616 |
| Mg2  | -0.718524 | 2.291305  | -1.232903 |
| Mg3  | 1.435666  | -2.422776 | 2.125265  |
| Mg4  | 2.148363  | 3.165271  | -0.774739 |
| Mg5  | 0.462042  | -3.074247 | -0.683448 |
| Mg6  | 1.183575  | 1.351611  | -3.368703 |
| Mg7  | -0.041319 | 2.274306  | 1.754743  |
| Mg8  | -0.581237 | -0.445099 | 3.132587  |
| Mg9  | 3.347148  | -3.382565 | -0.152016 |
| Mg10 | -0.536909 | -1.022895 | -2.587348 |
| Mg11 | 2.274112  | 0.604390  | 3.087351  |
| Mg12 | -3.772846 | 2.326341  | -1.861097 |
| Mg13 | 3.926905  | 1.279416  | -2.334053 |
| Mg14 | -3.715896 | -0.685605 | -2.247591 |
| Mg15 | -1.918780 | 1.249676  | -3.893502 |
| Mg16 | -1.557383 | -0.274898 | 0.214485  |
| Mg17 | 4.983385  | -1.070562 | -0.912839 |
| Mg18 | -4.434434 | -2.360348 | 0.258376  |
| Mg19 | 4.241959  | -1.359749 | 1.985629  |
| Mg20 | 4.285684  | 1.411856  | 0.746912  |
| Mg21 | 2.695665  | 3.498613  | 2.160596  |
| Mg22 | -2.811313 | 3.446596  | 0.754646  |
| Mg23 | -4.461025 | 0.742407  | 0.636303  |
| Mg24 | 2.537985  | -1.587446 | -2.610811 |
| Mg25 | -1.642518 | -3.140403 | 1.511836  |
| Mg26 | -3.566199 | -1.178228 | 2.848357  |
| Mg27 | -2.421525 | -3.331500 | -1.589967 |
| Mg28 | -2.767219 | 1.694500  | 3.105548  |

@mg28-isomer06 bp86/6-31G(d) Etot=-5602.707398 Eb=-16.94

|     |           |           |           |
|-----|-----------|-----------|-----------|
| Mg1 | 2.528547  | -2.935145 | 2.292035  |
| Mg2 | -2.464778 | -3.435670 | -1.193731 |
| Mg3 | 1.836398  | -3.619236 | -0.574277 |



|      |           |           |           |
|------|-----------|-----------|-----------|
| Mg4  | -0.436367 | -2.615377 | 1.358393  |
| Mg5  | -3.464087 | -2.619525 | 1.442714  |
| Mg6  | 4.427472  | -2.339680 | 0.032177  |
| Mg7  | 1.160812  | -0.525632 | 3.454402  |
| Mg8  | -1.983084 | -0.462221 | 3.197474  |
| Mg9  | 4.211626  | -0.472140 | 2.450263  |
| Mg10 | -4.392655 | -1.003847 | -1.187676 |
| Mg11 | -0.114038 | -1.747899 | -1.792877 |
| Mg12 | 1.558308  | -0.389663 | 0.394368  |
| Mg13 | 2.895557  | -1.409576 | -2.479622 |
| Mg14 | -4.765575 | -0.050341 | 1.821213  |
| Mg15 | -1.714355 | 0.027607  | 0.130971  |
| Mg16 | 4.384510  | 0.643425  | -0.506805 |
| Mg17 | -2.539260 | -1.397360 | -3.495425 |
| Mg18 | 2.958895  | 2.151557  | 1.895951  |
| Mg19 | 3.384792  | 3.429565  | -0.899063 |
| Mg20 | -4.438668 | 1.974976  | -0.388086 |
| Mg21 | 2.951936  | 1.485147  | -3.151976 |
| Mg22 | -2.467156 | 1.434509  | -2.590702 |
| Mg23 | -3.146999 | 2.362866  | 2.363767  |
| Mg24 | 0.188031  | 0.242932  | -3.919358 |
| Mg25 | -0.179487 | 1.812991  | 2.104750  |
| Mg26 | -1.877023 | 3.455753  | -0.149611 |
| Mg27 | 0.489080  | 1.842569  | -1.311303 |
| Mg28 | 1.007569  | 4.159416  | 0.702035  |

@mg28-isomer07 bp86/6-31G(d) Etot=-5602.706535 Eb=-16.92

|      |           |           |           |
|------|-----------|-----------|-----------|
| Mg1  | 1.347149  | 0.004284  | -0.147886 |
| Mg2  | -1.531154 | 1.418385  | 3.104832  |
| Mg3  | -1.617531 | -3.752094 | 1.947899  |
| Mg4  | -3.818133 | -3.157501 | 0.035863  |
| Mg5  | -3.051098 | 0.878800  | -3.211189 |
| Mg6  | -3.777086 | 2.762667  | -1.118113 |
| Mg7  | 4.522577  | -1.108170 | -2.837433 |
| Mg8  | 1.706915  | 1.041436  | 3.149084  |
| Mg9  | 1.890674  | -2.365540 | -2.142741 |
| Mg10 | -1.636001 | 0.419229  | 0.032169  |
| Mg11 | 4.541284  | 0.313135  | 2.058477  |
| Mg12 | -4.583782 | -0.266865 | -0.641945 |
| Mg13 | 2.192216  | 0.815483  | -3.148622 |
| Mg14 | 4.400290  | 1.110109  | -0.899469 |
| Mg15 | -0.427080 | -0.601771 | -3.117292 |
| Mg16 | 2.330561  | 3.285518  | -1.410801 |
| Mg17 | 1.495404  | -3.512578 | 0.789020  |
| Mg18 | -0.854770 | -2.450128 | -0.730879 |
| Mg19 | -0.530134 | 2.319869  | -2.030454 |
| Mg20 | 3.367516  | 2.954836  | 1.384902  |
| Mg21 | 0.372465  | 2.770506  | 0.992774  |
| Mg22 | -0.148773 | -1.185491 | 2.332353  |
| Mg23 | -2.337481 | 3.788208  | 1.219989  |
| Mg24 | -3.126833 | -2.047656 | -2.687753 |
| Mg25 | -4.233669 | 1.594136  | 1.747714  |
| Mg26 | 2.774405  | -1.871829 | 2.892283  |
| Mg27 | 4.038578  | -1.973674 | 0.084567  |
| Mg28 | -3.306510 | -1.183304 | 2.352651  |

@mg28-isomer08 bp86/6-31G(d) Etot=-5602.703993 Eb=-16.86

|     |           |           |           |
|-----|-----------|-----------|-----------|
| Mg1 | -4.429176 | -0.904800 | 0.215059  |
| Mg2 | -2.081042 | 2.489097  | -2.238430 |
| Mg3 | -4.524124 | 2.264337  | -0.485474 |
| Mg4 | -2.128923 | 3.236439  | 1.018233  |
| Mg5 | 2.893320  | -2.428608 | 1.806126  |
| Mg6 | -1.220711 | -0.474134 | -3.311487 |
| Mg7 | 1.963107  | -0.944952 | -3.043605 |

|      |           |           |           |
|------|-----------|-----------|-----------|
| Mg8  | 5.631846  | 1.783539  | -0.372236 |
| Mg9  | -3.149653 | -2.538221 | -2.016788 |
| Mg10 | -1.450667 | 0.221223  | -0.009521 |
| Mg11 | 4.355929  | -0.929816 | -1.062794 |
| Mg12 | -2.401928 | -3.454388 | 0.752109  |
| Mg13 | -1.272450 | 0.932977  | 3.276990  |
| Mg14 | -4.083835 | 0.246989  | -2.667288 |
| Mg15 | 0.659981  | 1.775842  | -3.532633 |
| Mg16 | 0.590653  | 3.046529  | 2.415429  |
| Mg17 | 4.506532  | 0.054311  | 1.843715  |
| Mg18 | 0.513243  | 2.787122  | -0.641680 |
| Mg19 | 2.702677  | -3.394545 | -1.187451 |
| Mg20 | -0.178598 | -2.432067 | -1.249665 |
| Mg21 | 1.871694  | 0.398076  | 3.194380  |
| Mg22 | 3.155536  | 2.643874  | 1.032161  |
| Mg23 | -0.153147 | -1.745099 | 2.143832  |
| Mg24 | 3.206261  | 1.806219  | -2.042553 |
| Mg25 | -4.121321 | 1.347981  | 2.363658  |
| Mg26 | 0.722481  | -4.335489 | 0.882166  |
| Mg27 | 1.552941  | -0.015378 | 0.044232  |
| Mg28 | -3.130626 | -1.437059 | 2.873514  |

@mg28-isomer09 bp86/6-31G(d) Etot=-5602.703374 Eb=-16.85

|      |           |           |           |
|------|-----------|-----------|-----------|
| Mg1  | -0.645200 | 1.890361  | -3.657601 |
| Mg2  | -0.369637 | -0.788694 | -2.565932 |
| Mg3  | -2.822371 | -2.597002 | -2.497123 |
| Mg4  | -3.247595 | 0.459010  | -2.699860 |
| Mg5  | -4.363572 | -1.207854 | -0.292446 |
| Mg6  | -4.599684 | 1.797435  | -0.411369 |
| Mg7  | 2.316993  | 0.624388  | -3.129352 |
| Mg8  | -2.035229 | 3.107280  | -1.165397 |
| Mg9  | -3.267224 | -4.111748 | 0.057279  |
| Mg10 | -0.588707 | -2.615954 | -0.221053 |
| Mg11 | 1.063060  | 2.892646  | -1.392692 |
| Mg12 | 2.095663  | -2.485883 | -1.886073 |
| Mg13 | -1.584568 | 0.284216  | 0.178193  |
| Mg14 | 1.785467  | -3.819483 | 1.143277  |
| Mg15 | -2.574313 | -2.001558 | 2.176541  |
| Mg16 | -4.256337 | 0.446138  | 2.318604  |
| Mg17 | 1.471716  | 0.088148  | -0.010713 |
| Mg18 | -2.996912 | 3.076684  | 1.822214  |
| Mg19 | 4.057642  | 2.424372  | -1.427079 |
| Mg20 | 2.814703  | 3.513074  | 1.125725  |
| Mg21 | 4.387389  | -3.362954 | -0.157469 |
| Mg22 | 0.398709  | -1.442597 | 2.539458  |
| Mg23 | -0.060408 | 2.716200  | 1.433047  |
| Mg24 | -1.358936 | 0.819774  | 3.401191  |
| Mg25 | 4.373416  | -0.522340 | -1.190032 |
| Mg26 | 3.486958  | -1.450170 | 2.074659  |
| Mg27 | 4.558751  | 1.158962  | 1.367585  |
| Mg28 | 1.960228  | 1.107551  | 3.066418  |

@mg28-isomer10 bp86/6-31G(d) Etot=-5602.701695 Eb=-16.81

|      |           |           |           |
|------|-----------|-----------|-----------|
| Mg1  | -1.937282 | 2.943260  | 2.173653  |
| Mg2  | -3.819129 | 0.573932  | 2.366105  |
| Mg3  | -4.045885 | 2.776181  | 0.108886  |
| Mg4  | -4.868982 | 0.045302  | -0.464241 |
| Mg5  | -0.134327 | 0.676517  | 2.841436  |
| Mg6  | -3.554793 | -2.241902 | 1.022280  |
| Mg7  | -2.035579 | -1.566122 | 3.523569  |
| Mg8  | -1.142166 | 3.323534  | -0.752045 |
| Mg9  | 1.467935  | -1.611544 | 3.895084  |
| Mg10 | 1.147770  | 3.038529  | 1.594880  |
| Mg11 | -3.092901 | 1.410984  | -2.526151 |

|      |           |           |           |
|------|-----------|-----------|-----------|
| Mg12 | -1.566921 | 0.243954  | 0.024875  |
| Mg13 | 3.109154  | 0.707881  | 2.786959  |
| Mg14 | -3.183596 | -1.804994 | -2.080018 |
| Mg15 | 1.560119  | 0.244051  | 0.044188  |
| Mg16 | 1.928851  | 3.441196  | -1.334404 |
| Mg17 | -0.034505 | -2.204090 | 1.321251  |
| Mg18 | -1.719902 | -3.978549 | -0.550136 |
| Mg19 | 3.204876  | -2.284279 | 1.535384  |
| Mg20 | 0.166264  | 1.373942  | -2.547087 |
| Mg21 | -1.430361 | -0.553044 | -4.166488 |
| Mg22 | 4.041720  | 2.709282  | 0.596552  |
| Mg23 | 0.044914  | -1.843810 | -1.835219 |
| Mg24 | 1.721148  | -3.997328 | -0.444215 |
| Mg25 | 3.765273  | 1.169358  | -2.155701 |
| Mg26 | 2.012613  | -0.633359 | -3.841681 |
| Mg27 | 3.522006  | -1.885607 | -1.571573 |
| Mg28 | 4.873688  | -0.073276 | 0.433856  |

@mg28-isomer11 bp86/6-31G(d) Etot=-5602.700023 Eb=-16.77

|      |           |           |           |
|------|-----------|-----------|-----------|
| Mg1  | -2.056121 | -3.257389 | -0.798154 |
| Mg2  | 2.941175  | 2.014618  | 2.913647  |
| Mg3  | -1.700775 | -0.140185 | 3.151765  |
| Mg4  | 2.027741  | 4.206627  | 1.051204  |
| Mg5  | 4.099554  | -2.744405 | -0.489793 |
| Mg6  | 4.368749  | 2.439133  | 0.326931  |
| Mg7  | 4.083252  | 0.144468  | -1.658074 |
| Mg8  | -0.758808 | 1.497457  | -2.509329 |
| Mg9  | 0.218252  | 1.732764  | 1.534276  |
| Mg10 | -0.304181 | -2.496590 | 1.823339  |
| Mg11 | -2.940596 | 2.476657  | 1.340354  |
| Mg12 | -4.996394 | 1.075776  | -0.594218 |
| Mg13 | -4.515918 | -0.027820 | 2.109699  |
| Mg14 | 1.080036  | -3.428391 | -0.734178 |
| Mg15 | 1.785391  | 0.431553  | -3.702807 |
| Mg16 | 2.733899  | -2.235045 | -3.023318 |
| Mg17 | -0.791244 | 3.888740  | -0.408711 |
| Mg18 | 2.662788  | -3.087161 | 2.066081  |
| Mg19 | -3.293786 | -2.733550 | 2.047401  |
| Mg20 | 1.331427  | -0.430665 | -0.212621 |
| Mg21 | -3.212160 | 3.003225  | -1.830995 |
| Mg22 | 1.910778  | 2.411044  | -1.371376 |
| Mg23 | 1.448591  | -0.539290 | 3.306151  |
| Mg24 | -3.285481 | -0.279588 | -2.699561 |
| Mg25 | -0.386215 | -1.503584 | -2.701703 |
| Mg26 | -4.649252 | -1.853463 | -0.448983 |
| Mg27 | -1.803994 | -0.175730 | 0.009061  |
| Mg28 | 4.003294  | -0.389206 | 1.503914  |

@mg28-isomer12 bp86/6-31G(d) Etot=-5602.699789 Eb=-16.77

|      |           |           |           |
|------|-----------|-----------|-----------|
| Mg1  | -0.201377 | 1.891372  | 2.774327  |
| Mg2  | 0.446724  | -3.407032 | -2.490428 |
| Mg3  | 2.693573  | 3.415373  | -1.551515 |
| Mg4  | -3.321212 | -3.950971 | -0.206070 |
| Mg5  | -2.708800 | 3.525866  | -1.383217 |
| Mg6  | -0.588158 | -0.982089 | 3.064500  |
| Mg7  | 1.834085  | -2.600192 | 2.270966  |
| Mg8  | 0.059185  | 3.044154  | -0.002991 |
| Mg9  | 1.437035  | 0.009123  | 0.237626  |
| Mg10 | 2.445368  | 1.074247  | -3.306023 |
| Mg11 | 2.298403  | 0.209507  | 3.295968  |
| Mg12 | 4.365995  | 0.936816  | -0.946781 |
| Mg13 | 3.066986  | -1.635065 | -2.290273 |
| Mg14 | -3.179059 | -2.354704 | 2.286616  |
| Mg15 | 5.044322  | 0.798840  | 2.124671  |

|      |           |           |           |
|------|-----------|-----------|-----------|
| Mg16 | -3.358800 | 0.601435  | 2.689898  |
| Mg17 | -0.315239 | 2.406501  | -2.935549 |
| Mg18 | 4.197550  | -1.631364 | 0.654622  |
| Mg19 | -0.537116 | -2.557749 | 0.288216  |
| Mg20 | -4.655234 | 1.830003  | 0.161887  |
| Mg21 | 2.781443  | 2.579502  | 1.353378  |
| Mg22 | -3.172036 | 0.754275  | -2.501553 |
| Mg23 | 0.014094  | -0.475928 | -2.451329 |
| Mg24 | -2.614992 | 3.374883  | 1.641335  |
| Mg25 | 2.447017  | -3.906997 | -0.341306 |
| Mg26 | -4.396656 | -1.111669 | -0.199510 |
| Mg27 | -2.509149 | -2.173165 | -2.424438 |
| Mg28 | -1.573953 | 0.335028  | 0.186975  |

@mg28-isomer13 bp86/6-31G(d) Etot=-5602.698879 Eb=-16.75

|      |           |           |           |
|------|-----------|-----------|-----------|
| Mg1  | -0.858092 | -1.556216 | -0.221406 |
| Mg2  | -1.009465 | 1.360824  | -0.127572 |
| Mg3  | 1.667036  | 0.077063  | 0.100234  |
| Mg4  | -2.971508 | -2.916459 | -2.159218 |
| Mg5  | -1.465127 | -2.401128 | 2.568423  |
| Mg6  | -0.801023 | 1.961198  | -3.001523 |
| Mg7  | -0.868890 | 4.761338  | -0.310258 |
| Mg8  | -3.208394 | 0.121277  | 2.679323  |
| Mg9  | -2.393602 | -4.581993 | 0.316819  |
| Mg10 | -2.483627 | 3.060454  | 1.855438  |
| Mg11 | -0.797142 | -1.070756 | -3.300257 |
| Mg12 | 1.679846  | -1.869420 | 2.500576  |
| Mg13 | 4.127238  | -1.489921 | -1.886828 |
| Mg14 | 0.825738  | 3.181364  | 1.806036  |
| Mg15 | -3.984572 | -1.825392 | 0.511500  |
| Mg16 | -0.296843 | 0.452916  | 2.725044  |
| Mg17 | -4.695080 | 1.256984  | 0.419920  |
| Mg18 | 1.815135  | 0.329933  | -2.972626 |
| Mg19 | 1.380183  | -2.694196 | -1.919738 |
| Mg20 | 2.590013  | 0.985489  | 3.019514  |
| Mg21 | -3.242739 | 3.246916  | -1.267012 |
| Mg22 | 3.784338  | 2.812305  | 1.033846  |
| Mg23 | 4.560056  | -0.372051 | 1.066470  |
| Mg24 | 4.333756  | 1.457350  | -1.500989 |
| Mg25 | 0.540232  | -4.201886 | 0.877208  |
| Mg26 | -3.220170 | 0.187213  | -1.981177 |
| Mg27 | 1.596323  | 2.964914  | -1.250044 |
| Mg28 | 3.396381  | -3.238117 | 0.418299  |

@mg28-isomer14 bp86/6-31G(d) Etot=-5602.696783 Eb=-16.70

|      |           |           |           |
|------|-----------|-----------|-----------|
| Mg1  | 3.522970  | 2.066222  | -2.257520 |
| Mg2  | 5.133392  | 0.497345  | -0.403454 |
| Mg3  | 3.889261  | 3.039820  | 0.551060  |
| Mg4  | 0.987103  | 3.215472  | -0.777440 |
| Mg5  | 3.287901  | -1.078746 | -2.404415 |
| Mg6  | 2.120428  | 2.541051  | 2.782004  |
| Mg7  | 3.680259  | -0.011643 | 2.300425  |
| Mg8  | 0.986936  | 0.887365  | -3.301016 |
| Mg9  | 4.323491  | -2.242790 | 0.322823  |
| Mg10 | 1.665943  | 0.342755  | -0.042866 |
| Mg11 | -0.671579 | 2.071584  | 1.731884  |
| Mg12 | -2.007274 | 4.044249  | 0.001699  |
| Mg13 | 0.587303  | -0.110479 | 3.268954  |
| Mg14 | -1.450465 | 1.329519  | -1.494507 |
| Mg15 | 0.195034  | -1.753904 | -2.031317 |
| Mg16 | 1.673235  | -2.471839 | 1.674244  |
| Mg17 | 2.234835  | -3.746269 | -1.131746 |
| Mg18 | -1.674773 | -0.574498 | -3.965349 |
| Mg19 | -1.053876 | -0.751113 | 0.617778  |

|      |           |           |           |
|------|-----------|-----------|-----------|
| Mg20 | -4.340676 | 2.561645  | -1.019219 |
| Mg21 | -3.682778 | 2.443844  | 2.015067  |
| Mg22 | -2.808811 | -0.238750 | 3.125514  |
| Mg23 | -4.273197 | 0.049875  | -2.686236 |
| Mg24 | -0.737974 | -3.783831 | 0.063361  |
| Mg25 | -2.940478 | -2.438371 | -1.653074 |
| Mg26 | -1.072056 | -2.707036 | 3.069289  |
| Mg27 | -4.150740 | -0.175310 | 0.361540  |
| Mg28 | -3.423415 | -3.006168 | 1.282516  |

@mg28-isomer15 bp86/6-31G(d) Etot=-5602.695908 Eb=-16.68

|      |           |           |           |
|------|-----------|-----------|-----------|
| Mg1  | -1.763619 | -0.140964 | 0.083765  |
| Mg2  | -3.194701 | -3.615064 | -0.218522 |
| Mg3  | -0.404535 | 0.430299  | 3.056564  |
| Mg4  | -2.787787 | 1.016213  | -2.731319 |
| Mg5  | -0.387072 | 2.490895  | -1.269319 |
| Mg6  | 0.773408  | 2.835007  | 1.691312  |
| Mg7  | 4.303533  | 0.335675  | 0.065184  |
| Mg8  | -0.338838 | -2.833065 | -0.006561 |
| Mg9  | -3.434459 | 0.461277  | 2.899017  |
| Mg10 | 3.358699  | -0.749383 | -2.641744 |
| Mg11 | -1.957274 | -2.277213 | 2.562022  |
| Mg12 | -4.713840 | -1.658371 | 1.362410  |
| Mg13 | 0.282979  | 0.180725  | -3.053626 |
| Mg14 | -1.843973 | -1.983525 | -2.631220 |
| Mg15 | 1.206562  | 0.011920  | 0.017866  |
| Mg16 | 4.269025  | -1.840701 | 2.213463  |
| Mg17 | 2.739697  | 0.692598  | 2.806424  |
| Mg18 | 1.177484  | -2.071733 | 2.672569  |
| Mg19 | 1.706798  | 4.635851  | -0.675415 |
| Mg20 | 2.697765  | 2.143072  | -1.994839 |
| Mg21 | 3.639639  | 3.101797  | 0.973310  |
| Mg22 | 2.622643  | -2.787781 | -0.065262 |
| Mg23 | -2.216787 | 2.874406  | 1.451984  |
| Mg24 | -4.532060 | -1.215929 | -1.655729 |
| Mg25 | -4.454125 | 1.280843  | 0.071575  |
| Mg26 | -3.148075 | 3.719999  | -1.310196 |
| Mg27 | 5.329527  | -2.330570 | -0.947809 |
| Mg28 | 1.069383  | -2.706278 | -2.725906 |

@mg28-isomer16 bp86/6-31G(d) Etot=-5602.694845 Eb=-16.66

|      |           |           |           |
|------|-----------|-----------|-----------|
| Mg1  | 2.788547  | 2.023966  | 2.136041  |
| Mg2  | -2.628903 | -2.306418 | -2.750661 |
| Mg3  | 1.006155  | 3.351950  | -0.198245 |
| Mg4  | 4.526080  | 0.345445  | -2.283853 |
| Mg5  | -1.964565 | 0.062158  | 3.896088  |
| Mg6  | -0.398469 | -0.272731 | -3.228983 |
| Mg7  | -3.412439 | 2.277373  | 2.463303  |
| Mg8  | -1.609451 | 0.043942  | -0.245637 |
| Mg9  | -0.770695 | -4.530278 | 1.142051  |
| Mg10 | 0.008144  | -2.513592 | -1.136454 |
| Mg11 | -3.005234 | -2.969191 | 0.194814  |
| Mg12 | 3.868740  | 2.813869  | -0.733125 |
| Mg13 | -0.100143 | -1.525478 | 1.954132  |
| Mg14 | 1.865703  | 1.779927  | -2.871232 |
| Mg15 | 2.082073  | -3.643183 | 1.014620  |
| Mg16 | -3.340447 | 0.569938  | -3.234847 |
| Mg17 | 3.156346  | -1.239982 | 2.420374  |
| Mg18 | -2.001452 | 3.836095  | 0.390157  |
| Mg19 | -4.112216 | 1.978907  | -0.565992 |
| Mg20 | 2.345772  | -1.531144 | -2.920933 |
| Mg21 | 1.253162  | 0.266811  | 4.107819  |
| Mg22 | 4.929231  | 0.465316  | 0.703335  |
| Mg23 | -3.955464 | -0.588339 | 1.793521  |

|      |           |           |           |
|------|-----------|-----------|-----------|
| Mg24 | -0.334718 | 1.836927  | 2.020315  |
| Mg25 | 4.102530  | -2.158512 | -0.513486 |
| Mg26 | -4.734239 | -0.929442 | -1.140965 |
| Mg27 | 1.571661  | 0.105604  | -0.199812 |
| Mg28 | -1.135709 | 2.450061  | -2.212347 |

@mg28-isomer17 bp86/6-31G(d) Etot=-5602.692613 Eb=-16.61

|      |           |           |           |
|------|-----------|-----------|-----------|
| Mg1  | -4.320614 | -0.748297 | 1.305854  |
| Mg2  | 2.237811  | -2.573006 | -2.164184 |
| Mg3  | -3.291774 | -2.776298 | -0.833521 |
| Mg4  | -5.454437 | -0.880127 | -1.622655 |
| Mg5  | 3.266374  | -2.683680 | 1.358307  |
| Mg6  | 4.950973  | -2.147614 | -1.098329 |
| Mg7  | -2.243836 | -3.061570 | 1.875301  |
| Mg8  | -0.355508 | 3.780075  | 2.174387  |
| Mg9  | -0.769473 | -2.722220 | -2.471611 |
| Mg10 | 4.555306  | 0.286235  | 0.689519  |
| Mg11 | 2.663123  | 2.514489  | 2.017440  |
| Mg12 | -2.856011 | 1.909275  | 2.113369  |
| Mg13 | -1.330140 | -0.335351 | 0.067748  |
| Mg14 | 0.178629  | 0.936789  | 2.759789  |
| Mg15 | -2.291028 | -0.634322 | 3.533244  |
| Mg16 | 0.502561  | -2.005797 | 2.900518  |
| Mg17 | 3.010766  | -0.283028 | 3.225476  |
| Mg18 | 0.485148  | -0.072784 | -2.818461 |
| Mg19 | -3.859403 | 1.506432  | -0.865002 |
| Mg20 | 3.589208  | 2.804199  | -0.804896 |
| Mg21 | 0.389387  | -3.323845 | 0.210548  |
| Mg22 | 1.632351  | -0.373178 | 0.164385  |
| Mg23 | 1.749450  | 2.597096  | -3.167988 |
| Mg24 | -2.722620 | -0.454893 | -2.913366 |
| Mg25 | -1.514769 | 2.337312  | -2.699426 |
| Mg26 | -2.297859 | 3.838911  | -0.125892 |
| Mg27 | 3.646076  | 0.225936  | -2.477909 |
| Mg28 | 0.450307  | 2.339261  | -0.332644 |

@mg28-isomer18 bp86/6-31G(d) Etot=-5602.683786 Eb=-16.41

|      |           |           |           |
|------|-----------|-----------|-----------|
| Mg1  | -6.459777 | 1.235919  | 0.579418  |
| Mg2  | 2.096316  | -0.013731 | 0.062960  |
| Mg3  | -3.659678 | -3.044826 | 1.387028  |
| Mg4  | -3.051263 | -1.941074 | -1.371076 |
| Mg5  | 0.027459  | 0.370466  | 2.671890  |
| Mg6  | 2.716639  | -1.118089 | -3.359533 |
| Mg7  | 0.735807  | 1.096328  | -2.838839 |
| Mg8  | 1.528513  | 2.949240  | 2.493485  |
| Mg9  | -0.617983 | -3.023525 | 0.306287  |
| Mg10 | -1.367245 | -2.214173 | 3.109064  |
| Mg11 | -4.057862 | 2.996527  | 0.471919  |
| Mg12 | -4.180489 | 0.800718  | -1.533895 |
| Mg13 | -3.308821 | 0.079781  | 1.527359  |
| Mg14 | 3.993054  | 2.806440  | 0.816273  |
| Mg15 | 3.431945  | 0.496322  | 2.791905  |
| Mg16 | 4.456257  | -2.010692 | 1.376643  |
| Mg17 | -1.234006 | 2.762402  | 1.333657  |
| Mg18 | -2.110664 | 0.147180  | -3.530200 |
| Mg19 | 4.947188  | -1.495043 | -1.469280 |
| Mg20 | -5.903511 | -1.580859 | 0.128374  |
| Mg21 | -0.012174 | -1.910650 | -2.497654 |
| Mg22 | -0.850717 | 0.084172  | -0.279921 |
| Mg23 | -1.729342 | 2.752855  | -1.735205 |
| Mg24 | 5.769440  | 0.558977  | 0.520899  |
| Mg25 | 2.246914  | -2.943669 | -0.774407 |
| Mg26 | 1.164864  | 2.945793  | -0.554979 |
| Mg27 | 3.887299  | 1.427392  | -1.866978 |

|                                                          |           |           |           |
|----------------------------------------------------------|-----------|-----------|-----------|
| Mg28                                                     | 1.541835  | -2.214181 | 2.234803  |
| @mg28-isomer19 bp86/6-31G(d) Etot=-5602.680400 Eb=-16.33 |           |           |           |
| Mg1                                                      | -1.578503 | 3.659846  | -1.743758 |
| Mg2                                                      | -5.143087 | -0.224946 | -0.263867 |
| Mg3                                                      | -3.409280 | 2.460111  | 0.503322  |
| Mg4                                                      | -4.105300 | 0.165820  | 2.504441  |
| Mg5                                                      | -3.182371 | 1.141393  | -2.265335 |
| Mg6                                                      | 0.283018  | 5.578902  | -0.397795 |
| Mg7                                                      | -3.352705 | -2.264131 | -1.595586 |
| Mg8                                                      | -1.048311 | -3.125502 | 0.552103  |
| Mg9                                                      | -3.976001 | -2.539044 | 1.420065  |
| Mg10                                                     | 0.260184  | 1.270349  | -2.196618 |
| Mg11                                                     | 0.268986  | 2.433442  | 0.629841  |
| Mg12                                                     | -1.377762 | -1.403141 | 3.047904  |
| Mg13                                                     | -1.540084 | 1.612950  | 2.808973  |
| Mg14                                                     | -1.272432 | -0.918178 | -3.368790 |
| Mg15                                                     | 2.785419  | 5.000810  | 1.139819  |
| Mg16                                                     | 2.423861  | 3.426428  | -1.483518 |
| Mg17                                                     | -1.704868 | -0.132268 | 0.070253  |
| Mg18                                                     | 3.383947  | 2.088961  | 1.185882  |
| Mg19                                                     | -0.712604 | -3.599784 | -2.382286 |
| Mg20                                                     | 1.253362  | 0.457043  | 2.864090  |
| Mg21                                                     | 1.415734  | -2.585622 | 2.502590  |
| Mg22                                                     | 1.164605  | -0.758281 | -0.008722 |
| Mg23                                                     | 1.666542  | -1.479455 | -2.850895 |
| Mg24                                                     | 1.708720  | -3.927618 | -0.652350 |
| Mg25                                                     | 3.920041  | -0.820059 | 1.488426  |
| Mg26                                                     | 3.934500  | -3.821563 | 1.294478  |
| Mg27                                                     | 3.698179  | 0.619147  | -1.534934 |
| Mg28                                                     | 4.236212  | -2.315612 | -1.267732 |
| @mg28-isomer20 bp86/6-31G(d) Etot=-5602.679598 Eb=-16.32 |           |           |           |
| Mg1                                                      | 0.538816  | 2.397874  | 0.511068  |
| Mg2                                                      | 2.698259  | 1.241365  | 2.432157  |
| Mg3                                                      | 4.200721  | 0.170765  | -1.921217 |
| Mg4                                                      | -1.301522 | 2.222649  | -1.933464 |
| Mg5                                                      | -4.126511 | 1.532038  | -1.000186 |
| Mg6                                                      | 1.671828  | 1.850008  | -2.278851 |
| Mg7                                                      | 1.578388  | -0.473536 | 0.018410  |
| Mg8                                                      | -3.062804 | 0.124032  | -3.429145 |
| Mg9                                                      | -2.937134 | -2.980399 | 0.476446  |
| Mg10                                                     | -0.315282 | 0.476104  | 2.733286  |
| Mg11                                                     | 4.754817  | -2.466840 | -0.289667 |
| Mg12                                                     | -2.381085 | 2.480045  | 1.225805  |
| Mg13                                                     | -3.155341 | 1.122479  | 3.816482  |
| Mg14                                                     | -1.539034 | -0.311171 | -0.027155 |
| Mg15                                                     | 2.527461  | -2.304016 | -2.245253 |
| Mg16                                                     | 3.705371  | 2.742603  | -0.234235 |
| Mg17                                                     | -0.154929 | -0.611142 | -2.737469 |
| Mg18                                                     | 4.977596  | 0.226605  | 0.976753  |
| Mg19                                                     | 0.092194  | -2.529274 | 1.989921  |
| Mg20                                                     | 3.227382  | -1.806140 | 2.360925  |
| Mg21                                                     | -1.047101 | 4.960186  | -0.267798 |
| Mg22                                                     | 1.922128  | 5.246320  | -0.327666 |
| Mg23                                                     | -2.449247 | -1.675025 | 3.257665  |
| Mg24                                                     | -4.392880 | -0.262304 | 1.437243  |
| Mg25                                                     | -0.170743 | -3.136046 | -0.951160 |
| Mg26                                                     | -4.723884 | -1.394601 | -1.362628 |
| Mg27                                                     | -2.507101 | -2.754020 | -2.707888 |
| Mg28                                                     | 2.369639  | -4.088558 | 0.477620  |
| @mg28-isomer21 bp86/6-31G(d) Etot=-5602.678163 Eb=-16.28 |           |           |           |
| Mg1                                                      | 0.077986  | -0.003387 | 2.744462  |

|      |           |           |           |
|------|-----------|-----------|-----------|
| Mg2  | 0.517073  | -0.269793 | -2.624293 |
| Mg3  | -1.967900 | 2.970736  | 2.408363  |
| Mg4  | 3.694244  | 0.919662  | -1.979077 |
| Mg5  | 1.092721  | 3.005115  | 1.973314  |
| Mg6  | 0.792874  | -2.992903 | 1.760586  |
| Mg7  | 0.811227  | -3.337076 | -1.322943 |
| Mg8  | -0.671468 | 1.252603  | 0.043684  |
| Mg9  | -1.553783 | -1.760462 | 0.028067  |
| Mg10 | -3.490780 | 2.688229  | -0.318631 |
| Mg11 | -2.068135 | -2.428770 | 3.001700  |
| Mg12 | -5.149842 | 0.058716  | -0.226270 |
| Mg13 | -2.810022 | 0.229088  | -2.176313 |
| Mg14 | 3.357076  | -3.650215 | 0.289338  |
| Mg15 | -4.550820 | -2.454093 | 1.384623  |
| Mg16 | 3.211293  | -1.297533 | 2.502599  |
| Mg17 | -1.114952 | 4.454612  | -0.045402 |
| Mg18 | -4.302248 | -2.486514 | -1.577816 |
| Mg19 | 3.238949  | -2.068215 | -2.376820 |
| Mg20 | 3.719340  | 1.703869  | 1.048061  |
| Mg21 | -3.110715 | 0.273441  | 1.964585  |
| Mg22 | 1.814744  | 3.031678  | -0.955944 |
| Mg23 | -0.971517 | 2.682618  | -2.569539 |
| Mg24 | 2.685520  | 1.364129  | 3.844183  |
| Mg25 | -1.672397 | -2.483884 | -2.991051 |
| Mg26 | 4.889548  | -1.102550 | -0.018997 |
| Mg27 | 1.841362  | 2.215534  | -3.874401 |
| Mg28 | 1.690623  | -0.514635 | 0.063932  |

@mg28-isomer22 bp86/6-31G(d) Etot=-5602.674344 Eb=-16.20

|      |           |           |           |
|------|-----------|-----------|-----------|
| Mg1  | 2.203891  | 1.836506  | 2.557261  |
| Mg2  | 1.231611  | 0.225904  | -0.148009 |
| Mg3  | -1.873648 | 0.224066  | 0.077968  |
| Mg4  | 2.771569  | -1.100422 | 3.278287  |
| Mg5  | 4.191764  | 0.178651  | 0.934676  |
| Mg6  | 3.035972  | 2.786380  | -0.375402 |
| Mg7  | -0.069482 | -0.490798 | 2.631403  |
| Mg8  | -3.788237 | 1.419893  | -2.057954 |
| Mg9  | -3.011667 | 0.321949  | 2.979052  |
| Mg10 | 1.232276  | -2.809836 | 1.222118  |
| Mg11 | -4.795306 | -1.628379 | 1.687535  |
| Mg12 | 1.313835  | 4.504886  | 1.357149  |
| Mg13 | 3.052604  | -2.162538 | -1.092511 |
| Mg14 | -0.020952 | -2.226392 | -1.499245 |
| Mg15 | -0.679232 | 0.518141  | -2.807279 |
| Mg16 | -2.882514 | 3.587131  | 0.063338  |
| Mg17 | -0.096001 | 2.919910  | -0.983193 |
| Mg18 | 6.347461  | -1.642221 | -0.422687 |
| Mg19 | 1.821417  | -0.882919 | -3.589886 |
| Mg20 | -4.916420 | 1.304267  | 0.793948  |
| Mg21 | 4.404621  | -2.925036 | 1.524589  |
| Mg22 | -2.924415 | -1.618883 | -2.225798 |
| Mg23 | 4.155211  | 0.446224  | -2.131968 |
| Mg24 | -1.878572 | -2.692760 | 0.996865  |
| Mg25 | -5.601118 | -0.898626 | -1.143032 |
| Mg26 | -4.361906 | -3.667161 | -0.508060 |
| Mg27 | -0.765471 | 2.377906  | 2.016988  |
| Mg28 | 1.902709  | 2.094157  | -3.136152 |

@mg28-isomer23 bp86/6-31G(d) Etot=-5602.670737 Eb=-16.12

|     |           |           |           |
|-----|-----------|-----------|-----------|
| Mg1 | 0.163389  | 2.553489  | 1.298179  |
| Mg2 | 0.912497  | -0.006377 | -0.206160 |
| Mg3 | -3.672985 | 1.516316  | -1.930034 |
| Mg4 | -0.727825 | 2.303698  | -1.733105 |
| Mg5 | -1.643985 | 0.144446  | -3.666112 |



|      |           |           |           |
|------|-----------|-----------|-----------|
| Mg6  | 2.987453  | 1.383095  | 1.710668  |
| Mg7  | 1.235864  | 0.279964  | -3.190048 |
| Mg8  | -1.966050 | -0.122150 | 0.161308  |
| Mg9  | 4.027703  | 0.243775  | -1.715231 |
| Mg10 | 2.537447  | -2.339486 | -1.386011 |
| Mg11 | 7.044328  | 0.297766  | -0.644984 |
| Mg12 | -2.680498 | 2.968247  | 0.677715  |
| Mg13 | -1.836615 | 1.417743  | 3.202184  |
| Mg14 | 5.392371  | -2.150056 | -0.148563 |
| Mg15 | -4.562753 | -2.367388 | 0.910657  |
| Mg16 | 0.211095  | -2.712019 | 1.030708  |
| Mg17 | 2.279066  | 2.619778  | -1.172697 |
| Mg18 | -4.443075 | 0.457129  | 2.028107  |
| Mg19 | 5.160540  | 2.490373  | 0.015640  |
| Mg20 | -5.614207 | 2.652264  | 0.225139  |
| Mg21 | -2.121099 | -1.815284 | 2.683878  |
| Mg22 | -2.204499 | -3.839160 | -0.107368 |
| Mg23 | 3.105792  | -1.676481 | 1.716283  |
| Mg24 | 5.794048  | 0.006422  | 2.047281  |
| Mg25 | -5.860206 | -0.207155 | -0.620484 |
| Mg26 | -0.514897 | -2.107643 | -2.034664 |
| Mg27 | 0.519149  | -0.302385 | 2.866820  |
| Mg28 | -3.522049 | -1.688923 | -2.019105 |

@mg28-isomer24 bp86/6-31G(d) Etot=-5602.669727 Eb=-16.10

|      |           |           |           |
|------|-----------|-----------|-----------|
| Mg1  | 0.902779  | -1.642370 | 0.242653  |
| Mg2  | 1.341458  | 1.356953  | -0.284790 |
| Mg3  | -1.298733 | 0.831595  | 0.753817  |
| Mg4  | 3.579947  | -2.635683 | -1.270402 |
| Mg5  | -1.269414 | -1.128255 | -1.799290 |
| Mg6  | 0.888455  | -3.230178 | -2.500107 |
| Mg7  | -3.666221 | 2.664141  | -0.478621 |
| Mg8  | 1.565136  | -4.959166 | -0.099647 |
| Mg9  | 1.774658  | -0.301554 | -2.638578 |
| Mg10 | -2.931036 | -1.991547 | 1.246061  |
| Mg11 | -3.995982 | -2.432690 | -1.527150 |
| Mg12 | 3.758809  | 2.409639  | 1.551598  |
| Mg13 | -3.673197 | 0.838791  | 2.369183  |
| Mg14 | -0.465697 | 4.305184  | -0.594231 |
| Mg15 | 1.682680  | 3.143525  | -2.613731 |
| Mg16 | 1.768838  | 0.162300  | 2.494077  |
| Mg17 | 2.682781  | 4.573672  | -0.152007 |
| Mg18 | -1.131200 | 1.869595  | -2.244205 |
| Mg19 | 3.051361  | -3.208954 | 1.788409  |
| Mg20 | -0.937416 | -0.944727 | 3.165853  |
| Mg21 | -2.192319 | 3.580050  | 1.968337  |
| Mg22 | 4.140344  | -0.544823 | 0.821236  |
| Mg23 | -5.242495 | -0.098758 | 0.081618  |
| Mg24 | -1.348670 | -4.013335 | -0.584619 |
| Mg25 | -3.767805 | 0.451765  | -2.474273 |
| Mg26 | 4.091295  | 1.546515  | -1.450354 |
| Mg27 | -0.102651 | -3.736236 | 2.199612  |
| Mg28 | 0.794294  | 3.134549  | 2.029551  |

@mg28-isomer25 bp86/6-31G(d) Etot=-5602.669401 Eb=-16.09

|     |           |           |           |
|-----|-----------|-----------|-----------|
| Mg1 | -2.308522 | -0.394269 | -0.013867 |
| Mg2 | -4.526736 | -2.989327 | -0.592913 |
| Mg3 | -1.563810 | -3.657969 | -0.181971 |
| Mg4 | -3.203998 | 2.971906  | -1.598306 |
| Mg5 | 0.230524  | -1.661541 | -1.633147 |
| Mg6 | 1.593251  | -3.524604 | 0.318210  |
| Mg7 | -1.444417 | 0.813450  | -2.635312 |
| Mg8 | 1.973604  | 0.850724  | -2.605438 |
| Mg9 | -0.220832 | 3.445753  | -1.627253 |

|      |           |           |           |
|------|-----------|-----------|-----------|
| Mg10 | 2.547988  | -0.828278 | 1.457865  |
| Mg11 | -1.804735 | 2.941486  | 1.204407  |
| Mg12 | -3.248864 | -2.551085 | 2.115678  |
| Mg13 | -4.627622 | 2.036272  | 0.775608  |
| Mg14 | 0.527196  | 0.995857  | -0.001541 |
| Mg15 | 6.381487  | -1.480940 | -0.915142 |
| Mg16 | -0.314190 | -1.694313 | 1.898215  |
| Mg17 | -2.690604 | 0.524844  | 2.750450  |
| Mg18 | 4.607277  | 1.022743  | -1.046748 |
| Mg19 | -4.688903 | 0.145049  | -1.715812 |
| Mg20 | 3.307752  | -1.790074 | -1.675441 |
| Mg21 | 3.334689  | 2.083927  | 1.627199  |
| Mg22 | -2.656292 | -2.108219 | -2.620477 |
| Mg23 | 1.092936  | 4.019922  | 1.331421  |
| Mg24 | 4.559374  | -3.087686 | 0.812275  |
| Mg25 | 0.369920  | 1.406856  | 2.949950  |
| Mg26 | -5.476136 | -0.762228 | 1.169906  |
| Mg27 | 5.532821  | -0.207585 | 1.542674  |
| Mg28 | 2.716842  | 3.479329  | -1.090491 |

@mg28-isomer26 bp86/6-31G(d) Etot=-5602.669258 Eb=-16.09

|      |           |           |           |
|------|-----------|-----------|-----------|
| Mg1  | -0.911237 | -0.807517 | -0.182764 |
| Mg2  | -3.033565 | 1.101374  | -1.642010 |
| Mg3  | -1.240665 | -0.915834 | -3.342347 |
| Mg4  | -2.081086 | 1.778820  | 1.412096  |
| Mg5  | -2.112134 | -3.594596 | 0.812140  |
| Mg6  | -2.576876 | -1.076593 | 2.581123  |
| Mg7  | 1.962631  | -0.044872 | -0.014945 |
| Mg8  | 4.609250  | -0.195760 | -2.031642 |
| Mg9  | 1.765537  | -0.641552 | -3.047314 |
| Mg10 | -4.033875 | -1.337331 | -0.094654 |
| Mg11 | -2.732957 | -3.204890 | -2.113282 |
| Mg12 | 0.280224  | -3.186369 | -2.093126 |
| Mg13 | -4.910996 | 0.840280  | 1.913594  |
| Mg14 | -0.040837 | 1.602153  | -2.070124 |
| Mg15 | 0.290640  | 0.271750  | 2.637127  |
| Mg16 | -1.768679 | 3.786667  | -0.828954 |
| Mg17 | -4.575565 | 3.345868  | 0.217603  |
| Mg18 | 5.298961  | 1.918931  | 0.000726  |
| Mg19 | -0.106533 | -2.556575 | 3.497507  |
| Mg20 | 0.910546  | -3.302766 | 0.830152  |
| Mg21 | 2.850911  | 2.387151  | -1.788225 |
| Mg22 | 3.137487  | -2.783073 | -1.107761 |
| Mg23 | 3.420584  | 4.053968  | 0.778696  |
| Mg24 | 4.996443  | -0.904664 | 0.856696  |
| Mg25 | 3.294991  | 1.388594  | 2.335234  |
| Mg26 | 0.678045  | 2.747590  | 0.754369  |
| Mg27 | -6.082176 | 1.101702  | -0.868446 |
| Mg28 | 2.710929  | -1.772457 | 2.598530  |

@mg28-isomer27 bp86/6-31G(d) Etot=-5602.668771 Eb=-16.07

|      |           |           |           |
|------|-----------|-----------|-----------|
| Mg1  | 1.153438  | 0.149494  | -0.027323 |
| Mg2  | 3.246012  | 1.722183  | -2.764519 |
| Mg3  | -1.164715 | -1.442428 | 2.687504  |
| Mg4  | 4.164721  | -0.612299 | -1.142187 |
| Mg5  | -0.446578 | -2.592303 | -0.033931 |
| Mg6  | -3.251966 | 1.639776  | -2.135494 |
| Mg7  | -2.107761 | 0.024524  | 0.130486  |
| Mg8  | -4.273306 | -1.177962 | -1.712214 |
| Mg9  | 1.784698  | -2.250220 | 2.064143  |
| Mg10 | 1.619370  | 2.569745  | 1.718449  |
| Mg11 | -0.774652 | 2.723509  | -0.204492 |
| Mg12 | -1.314260 | 1.730311  | 2.648843  |
| Mg13 | -3.752461 | 2.714727  | 0.806511  |

|      |           |           |           |
|------|-----------|-----------|-----------|
| Mg14 | 1.676867  | -0.934183 | -2.903420 |
| Mg15 | -4.340805 | 0.132644  | 2.221018  |
| Mg16 | -3.585189 | -2.517119 | 0.989114  |
| Mg17 | 6.395275  | 0.149964  | 0.767625  |
| Mg18 | 0.216134  | -3.569319 | -2.748936 |
| Mg19 | 2.559074  | -3.137685 | -0.791156 |
| Mg20 | -5.899281 | 1.239937  | -0.520396 |
| Mg21 | 4.791678  | -2.413145 | 1.188939  |
| Mg22 | 3.673829  | 0.200801  | 2.237886  |
| Mg23 | 0.197627  | 1.762587  | -2.862411 |
| Mg24 | 1.027921  | 0.250226  | 3.667337  |
| Mg25 | 4.303178  | 2.259442  | 0.027873  |
| Mg26 | -1.365458 | -0.884360 | -2.781914 |
| Mg27 | 1.832679  | 3.742540  | -1.089124 |
| Mg28 | -6.366070 | -1.481391 | 0.561791  |

@mg28-isomer28 bp86/6-31G(d) Etot=-5602.667217 Eb=-16.04

|      |           |           |           |
|------|-----------|-----------|-----------|
| Mg1  | -1.917529 | 0.092878  | 0.148572  |
| Mg2  | 1.113109  | 0.272130  | -0.255196 |
| Mg3  | -1.093945 | 2.045150  | 2.541412  |
| Mg4  | -4.853537 | 0.769445  | -0.362902 |
| Mg5  | 3.818067  | -0.380228 | -1.780151 |
| Mg6  | -0.003090 | -2.268193 | 1.082347  |
| Mg7  | -3.284639 | 3.119145  | 0.792692  |
| Mg8  | 5.588085  | -0.396110 | 0.673570  |
| Mg9  | -3.511444 | 0.026117  | -3.035906 |
| Mg10 | -3.746087 | -2.320957 | -1.024938 |
| Mg11 | -0.878223 | -1.430228 | -2.285431 |
| Mg12 | -4.155921 | 1.182849  | 2.814948  |
| Mg13 | -4.665674 | -1.501830 | 1.816075  |
| Mg14 | 3.012823  | -1.781300 | 1.128848  |
| Mg15 | 2.141516  | 2.366745  | -2.246196 |
| Mg16 | -3.209071 | 2.780140  | -2.151728 |
| Mg17 | -0.691335 | 1.409025  | -3.214053 |
| Mg18 | -0.563696 | 2.892072  | -0.544370 |
| Mg19 | -1.962601 | -0.978406 | 3.156992  |
| Mg20 | 1.687143  | -0.395715 | -3.796831 |
| Mg21 | 1.751919  | -2.721954 | -1.673600 |
| Mg22 | 8.659736  | -0.970076 | 0.679901  |
| Mg23 | 4.130188  | 2.247705  | -0.088212 |
| Mg24 | 3.752532  | 0.867373  | 2.614812  |
| Mg25 | 1.694538  | 2.870101  | 1.576293  |
| Mg26 | 0.977564  | -0.081582 | 3.084613  |
| Mg27 | -1.113891 | -4.113687 | -1.080184 |
| Mg28 | -2.676537 | -3.600609 | 1.428626  |

@mg28-isomer29 bp86/6-31G(d) Etot=-5602.666117 Eb=-16.01

|      |           |           |           |
|------|-----------|-----------|-----------|
| Mg1  | 0.981012  | -0.091285 | 0.496356  |
| Mg2  | 0.569058  | -1.048722 | -2.486560 |
| Mg3  | -2.271954 | -1.772746 | 2.452685  |
| Mg4  | -1.918519 | 0.058449  | -0.206444 |
| Mg5  | 3.654202  | -2.385202 | 2.315734  |
| Mg6  | -3.364078 | -3.451312 | 0.185465  |
| Mg7  | -1.489107 | 0.755988  | -3.524481 |
| Mg8  | 2.741672  | 2.438396  | 0.577051  |
| Mg9  | -4.908739 | 2.106234  | 0.195480  |
| Mg10 | -0.571039 | 2.522870  | 1.075223  |
| Mg11 | 0.495094  | 2.069674  | -1.764369 |
| Mg12 | 4.572665  | 0.003181  | 0.747026  |
| Mg13 | 5.452528  | -1.593571 | -1.861022 |
| Mg14 | -4.768532 | -0.836473 | 0.811404  |
| Mg15 | 2.672358  | 0.378557  | 3.144677  |
| Mg16 | -0.459883 | -2.717251 | -0.016850 |
| Mg17 | 3.177342  | 0.554528  | -1.970327 |

|      |           |           |           |
|------|-----------|-----------|-----------|
| Mg18 | -2.280061 | -2.080531 | -2.535840 |
| Mg19 | -3.233820 | 1.230355  | 2.556762  |
| Mg20 | -0.467393 | 0.487393  | 3.370722  |
| Mg21 | -4.239397 | 0.438345  | -2.205131 |
| Mg22 | -5.220837 | -2.359252 | -1.829023 |
| Mg23 | -3.100935 | 4.082325  | 1.424923  |
| Mg24 | 5.453716  | 2.551301  | -0.875221 |
| Mg25 | 7.472359  | 0.357343  | -0.917334 |
| Mg26 | -2.422118 | 2.938907  | -1.413394 |
| Mg27 | 0.666715  | -2.312960 | 2.898058  |
| Mg28 | 2.807694  | -2.324540 | -0.645570 |

@mg28-isomer30 bp86/6-31G(d) Etot=-5602.664993 Eb=-15.99

|      |           |           |           |
|------|-----------|-----------|-----------|
| Mg1  | 3.373122  | -1.573503 | 2.999007  |
| Mg2  | 1.592558  | 0.797763  | 2.808260  |
| Mg3  | 0.045870  | -2.022245 | 2.550306  |
| Mg4  | 4.139420  | 0.746181  | 1.075907  |
| Mg5  | -0.063569 | 3.340015  | 2.465412  |
| Mg6  | -3.096659 | -2.052224 | 2.115822  |
| Mg7  | 4.809118  | -2.406378 | 0.554631  |
| Mg8  | 2.348941  | -3.999674 | 1.431797  |
| Mg9  | -3.104639 | 3.278519  | 1.824886  |
| Mg10 | -4.580263 | 0.708380  | 2.169772  |
| Mg11 | -1.557063 | 0.684741  | 2.293087  |
| Mg12 | 1.841694  | -1.225507 | 0.223745  |
| Mg13 | -1.188421 | 4.071155  | -0.404105 |
| Mg14 | -1.538374 | -0.833495 | -0.312920 |
| Mg15 | -0.243233 | -3.583737 | -0.274199 |
| Mg16 | 0.535805  | 1.359735  | -0.115867 |
| Mg17 | -4.915269 | -0.987755 | -0.212331 |
| Mg18 | -3.408618 | -3.552942 | -0.564711 |
| Mg19 | 2.228545  | 3.831634  | 0.614275  |
| Mg20 | 4.144217  | -0.660231 | -1.798554 |
| Mg21 | -3.209794 | 1.729046  | -0.818155 |
| Mg22 | 1.152918  | -1.784784 | -2.617889 |
| Mg23 | 3.774881  | 2.363889  | -1.412332 |
| Mg24 | -1.692845 | -2.586039 | -2.861643 |
| Mg25 | 1.022779  | 3.263220  | -2.315710 |
| Mg26 | -3.767979 | -0.378886 | -2.884024 |
| Mg27 | -0.862841 | 0.625797  | -3.022348 |
| Mg28 | 2.219699  | 0.847326  | -3.512116 |

@mg28-isomer31 bp86/6-31G(d) Etot=-5602.659152 Eb=-15.86

|      |           |           |           |
|------|-----------|-----------|-----------|
| Mg1  | -1.768722 | 0.224435  | 0.194005  |
| Mg2  | 1.126144  | -0.481394 | -0.329190 |
| Mg3  | -0.931014 | -2.860312 | -0.102039 |
| Mg4  | -4.626911 | -0.300113 | -0.941111 |
| Mg5  | 3.801437  | 1.123576  | -0.862850 |
| Mg6  | -0.045665 | 0.244182  | 2.851769  |
| Mg7  | -2.905981 | -2.481532 | -2.294826 |
| Mg8  | 5.792329  | 0.076308  | 1.306115  |
| Mg9  | -3.458077 | 2.397660  | -1.639186 |
| Mg10 | -4.193514 | 2.096264  | 1.215249  |
| Mg11 | -1.276238 | 3.973748  | -0.329236 |
| Mg12 | -3.994112 | -3.063100 | 0.465536  |
| Mg13 | -4.939606 | -0.809799 | 2.076241  |
| Mg14 | 2.897950  | 0.160266  | 2.072445  |
| Mg15 | 2.220697  | 1.041273  | -3.503538 |
| Mg16 | -2.724987 | 0.166931  | -3.428583 |
| Mg17 | -0.431233 | 1.713807  | -2.231374 |
| Mg18 | -0.087041 | -1.381056 | -2.862268 |
| Mg19 | -2.020453 | -2.022248 | 2.619129  |
| Mg20 | 2.032221  | 3.565814  | -1.743099 |
| Mg21 | 0.956627  | 2.280327  | 0.804682  |

|      |           |           |           |
|------|-----------|-----------|-----------|
| Mg22 | 8.801036  | 0.639254  | 1.973968  |
| Mg23 | 3.252160  | -1.626880 | -2.650237 |
| Mg24 | 4.008914  | -2.059672 | 0.245687  |
| Mg25 | 1.867388  | -3.699412 | -1.000469 |
| Mg26 | 1.191934  | -2.492686 | 2.087046  |
| Mg27 | -1.561752 | 2.913024  | 2.397831  |
| Mg28 | -2.983532 | 0.661337  | 3.608304  |

@mg28-isomer32 bp86/6-31G(d) Etot=-5602.649985 Eb=-15.65

|      |           |           |           |
|------|-----------|-----------|-----------|
| Mg1  | -2.383780 | -1.578426 | 1.125821  |
| Mg2  | -1.293534 | -0.149881 | -1.693894 |
| Mg3  | 4.873820  | 1.254813  | -0.962436 |
| Mg4  | 5.426484  | -0.400001 | 1.530350  |
| Mg5  | 1.903153  | 0.777688  | -1.769657 |
| Mg6  | 3.782412  | -1.717559 | -0.585226 |
| Mg7  | 4.165956  | -0.675590 | -3.347416 |
| Mg8  | 0.413485  | 5.720959  | 0.080245  |
| Mg9  | 2.806140  | 1.141484  | 1.536615  |
| Mg10 | -3.355891 | 2.315489  | -1.910708 |
| Mg11 | -0.287077 | 2.793506  | -1.386891 |
| Mg12 | -4.553403 | 0.094313  | -0.131409 |
| Mg13 | 1.165512  | -2.188091 | -2.373230 |
| Mg14 | -2.420690 | 4.638520  | -0.144136 |
| Mg15 | -3.892829 | -2.890277 | -1.183637 |
| Mg16 | -0.088083 | 0.374047  | 3.190019  |
| Mg17 | 0.408296  | 3.033033  | 1.658882  |
| Mg18 | -1.740226 | -2.743440 | -3.292450 |
| Mg19 | -3.915206 | 0.385118  | 2.927507  |
| Mg20 | 1.917443  | -3.949856 | 0.323762  |
| Mg21 | -0.051914 | -2.943016 | 2.514851  |
| Mg22 | -2.179508 | -1.591581 | 4.313996  |
| Mg23 | -1.990700 | 1.562248  | 0.854048  |
| Mg24 | -0.908954 | -3.627429 | -0.566460 |
| Mg25 | 2.603587  | 3.465950  | -0.441932 |
| Mg26 | 2.918738  | -1.833677 | 2.338776  |
| Mg27 | -3.936976 | -0.503078 | -3.036423 |
| Mg28 | 0.613746  | -0.765265 | 0.431033  |

@mg28-isomer33 bp86/6-31G(d) Etot=-5602.647896 Eb=-15.61

|      |           |           |           |
|------|-----------|-----------|-----------|
| Mg1  | -0.642329 | 2.700660  | 0.670476  |
| Mg2  | 0.481087  | -0.542057 | -2.789702 |
| Mg3  | 3.537259  | -1.022521 | -2.472299 |
| Mg4  | 0.042923  | 0.909080  | 3.093920  |
| Mg5  | -4.052096 | 2.589276  | 0.211086  |
| Mg6  | 0.419653  | -1.901017 | 2.074771  |
| Mg7  | -4.841273 | 1.540928  | -2.640501 |
| Mg8  | -2.365391 | 0.249390  | 1.475861  |
| Mg9  | 0.671779  | 2.530353  | -2.223682 |
| Mg10 | -4.047519 | -1.320082 | -1.766825 |
| Mg11 | 2.097682  | 3.922216  | 0.088820  |
| Mg12 | 1.448259  | 0.404330  | 0.139115  |
| Mg13 | 3.710663  | 1.917425  | -1.582984 |
| Mg14 | 1.902492  | 3.158965  | 2.993024  |
| Mg15 | 4.486042  | -0.486514 | 0.399478  |
| Mg16 | 5.075743  | -3.209030 | -0.644309 |
| Mg17 | -6.189537 | 0.439126  | -0.190782 |
| Mg18 | -1.989750 | 1.134993  | -1.641412 |
| Mg19 | -0.409106 | -4.535439 | 0.603077  |
| Mg20 | -4.523181 | -1.834202 | 1.185617  |
| Mg21 | 4.249866  | 2.351875  | 1.435605  |
| Mg22 | -3.165683 | -4.036310 | -0.458492 |
| Mg23 | 1.746547  | -2.611353 | -0.713378 |
| Mg24 | 2.945498  | 0.072356  | 3.017044  |
| Mg25 | 2.456942  | 1.211610  | -4.269792 |

|      |           |           |           |
|------|-----------|-----------|-----------|
| Mg26 | -1.187063 | -1.619277 | -0.505832 |
| Mg27 | -5.120685 | 0.897910  | 2.644415  |
| Mg28 | 3.261179  | -2.912693 | 1.867682  |

@mg28-isomer34 bp86/6-31G(d) Etot=-5602.641241 Eb=-15.46

|      |           |           |           |
|------|-----------|-----------|-----------|
| Mg1  | -0.057802 | 0.881146  | 1.989414  |
| Mg2  | -2.494641 | 2.729146  | 1.291090  |
| Mg3  | 0.204757  | -1.267118 | -0.401404 |
| Mg4  | -2.403216 | -0.545205 | 0.910953  |
| Mg5  | 1.808396  | 0.568872  | -3.262873 |
| Mg6  | -4.969270 | 0.938603  | 0.695639  |
| Mg7  | 4.078002  | -0.650917 | -1.551194 |
| Mg8  | -0.803862 | 1.364644  | -1.402455 |
| Mg9  | 1.559443  | 3.409637  | -1.870865 |
| Mg10 | -2.851873 | -3.434815 | 1.579057  |
| Mg11 | 1.890724  | -3.310524 | 0.760139  |
| Mg12 | -1.387124 | 4.341492  | -1.107642 |
| Mg13 | 2.382068  | 2.185627  | 3.094036  |
| Mg14 | 2.325493  | -0.904835 | 2.723093  |
| Mg15 | 0.444784  | 3.694586  | 1.130273  |
| Mg16 | 3.495414  | 3.568898  | 0.540086  |
| Mg17 | -3.697378 | 2.511750  | -1.607170 |
| Mg18 | 4.634795  | 0.850249  | 1.483158  |
| Mg19 | 4.141350  | -3.700537 | -1.409302 |
| Mg20 | -2.122532 | -2.873093 | -1.452567 |
| Mg21 | 1.714184  | -2.430945 | -2.648971 |
| Mg22 | -0.799769 | -0.902858 | -3.440849 |
| Mg23 | -4.905834 | -2.067410 | -0.253753 |
| Mg24 | -0.429366 | -2.099050 | 2.803397  |
| Mg25 | 2.073787  | 0.974204  | -0.112331 |
| Mg26 | -4.892055 | -1.336280 | 2.736865  |
| Mg27 | 4.669919  | -2.107085 | 1.139856  |
| Mg28 | -3.608393 | -0.388181 | -2.355681 |

@mg28-isomer35 bp86/6-31G(d) Etot=-5602.640055 Eb=-15.43

|      |           |           |           |
|------|-----------|-----------|-----------|
| Mg1  | -1.426630 | 2.396681  | -2.101886 |
| Mg2  | 0.256922  | 0.624102  | 0.296185  |
| Mg3  | 2.563556  | 3.049318  | 0.757744  |
| Mg4  | -2.110465 | 0.141000  | 2.244715  |
| Mg5  | 3.256403  | 0.720980  | -1.140458 |
| Mg6  | 0.567373  | -0.094488 | -2.634546 |
| Mg7  | 6.119090  | -0.491678 | -1.520888 |
| Mg8  | -2.617918 | 2.730380  | 0.818430  |
| Mg9  | -0.172333 | 4.154903  | 0.150208  |
| Mg10 | 0.435209  | -0.177912 | 3.979242  |
| Mg11 | 2.169010  | -2.126654 | -0.876675 |
| Mg12 | 5.089819  | -3.276761 | -1.574748 |
| Mg13 | -2.425530 | -0.232051 | -1.085566 |
| Mg14 | 1.427969  | 2.856139  | -2.055110 |
| Mg15 | -4.836906 | 0.498797  | 0.783750  |
| Mg16 | -4.447950 | 2.240126  | -1.728913 |
| Mg17 | 4.586485  | -1.570455 | 1.009781  |
| Mg18 | -0.725583 | -2.382345 | 0.027379  |
| Mg19 | -3.615546 | -2.327672 | 1.174950  |
| Mg20 | 2.869867  | 0.546419  | 2.457565  |
| Mg21 | -5.990016 | -0.300728 | -2.298837 |
| Mg22 | 5.482379  | 1.353524  | 0.798536  |
| Mg23 | -4.155711 | -2.661818 | -1.839995 |
| Mg24 | 1.641825  | -2.246301 | 2.091812  |
| Mg25 | -6.471749 | -2.066423 | 0.028429  |
| Mg26 | 3.601350  | -1.254198 | -3.395396 |
| Mg27 | -1.202353 | -2.603796 | 2.986041  |
| Mg28 | 0.131434  | 2.500910  | 2.648249  |

@mg28-isomer36 bp86/6-31G(d) Etot=-5602.638738 Eb=-15.40

|      |           |           |           |
|------|-----------|-----------|-----------|
| Mg1  | 0.630312  | 1.109211  | -0.072152 |
| Mg2  | -1.321415 | 2.193349  | -2.057549 |
| Mg3  | 0.092503  | -1.200790 | 1.899850  |
| Mg4  | 4.009848  | -1.085393 | -1.533193 |
| Mg5  | 2.783381  | 0.706784  | 2.105004  |
| Mg6  | 2.189916  | 3.539319  | 1.211882  |
| Mg7  | -2.850756 | -0.213926 | 2.541751  |
| Mg8  | -2.157355 | -3.177524 | 1.098110  |
| Mg9  | 1.022938  | -1.766653 | -1.166040 |
| Mg10 | 3.086643  | -2.153035 | 1.416737  |
| Mg11 | 3.181718  | -4.066754 | -0.871058 |
| Mg12 | 1.570535  | 3.557567  | -1.879215 |
| Mg13 | 5.616711  | -0.086091 | 0.958962  |
| Mg14 | -0.346122 | 1.986489  | 2.625258  |
| Mg15 | -3.931462 | -3.145588 | -1.472430 |
| Mg16 | -4.345814 | 1.870656  | -1.630335 |
| Mg17 | 1.878703  | 0.689717  | -2.819974 |
| Mg18 | 3.870010  | 1.836101  | -0.652870 |
| Mg19 | 5.915108  | -2.942320 | 0.098016  |
| Mg20 | -0.704521 | 4.206207  | 0.316426  |
| Mg21 | -2.212393 | -0.474418 | -0.594643 |
| Mg22 | -5.486508 | 0.935381  | 1.031361  |
| Mg23 | -5.768416 | -0.775982 | -1.431531 |
| Mg24 | 1.472229  | 6.164181  | -0.381524 |
| Mg25 | 0.679498  | -4.123880 | 0.798956  |
| Mg26 | -4.964553 | -2.041914 | 1.190235  |
| Mg27 | -2.857794 | 2.350303  | 0.939710  |
| Mg28 | -1.052943 | -3.890996 | -1.669747 |

@mg28-isomer37 bp86/6-31G(d) Etot=-5602.638341 Eb=-15.39

|      |           |           |           |
|------|-----------|-----------|-----------|
| Mg1  | 0.571539  | 2.523587  | -0.030988 |
| Mg2  | 2.909382  | -3.645613 | 0.140246  |
| Mg3  | 3.005395  | 1.835910  | -1.799704 |
| Mg4  | 4.937250  | -1.483469 | 0.582735  |
| Mg5  | -1.116420 | -0.572050 | 0.289857  |
| Mg6  | 5.727968  | 0.514005  | -1.533062 |
| Mg7  | -1.974101 | 1.730820  | -1.432167 |
| Mg8  | 3.273918  | 1.793406  | 1.364244  |
| Mg9  | 6.227958  | 1.138990  | 1.393713  |
| Mg10 | -4.073838 | 0.174815  | 1.694464  |
| Mg11 | 0.077948  | -4.061147 | 0.745999  |
| Mg12 | -1.962718 | 2.292679  | 1.711321  |
| Mg13 | 0.317867  | -1.911108 | 2.875924  |
| Mg14 | 3.440243  | -1.333235 | -2.212949 |
| Mg15 | -1.891252 | -0.145736 | 3.749105  |
| Mg16 | -4.141600 | -1.545378 | -0.732080 |
| Mg17 | 1.847532  | -0.743098 | 0.474422  |
| Mg18 | -4.526256 | 0.837546  | -2.634033 |
| Mg19 | 0.587483  | -2.757240 | -1.956062 |
| Mg20 | 0.599546  | 1.133482  | 2.742775  |
| Mg21 | -6.379531 | 0.641741  | -0.350717 |
| Mg22 | -4.546021 | 2.967117  | -0.083659 |
| Mg23 | -2.004604 | -1.231782 | -2.797635 |
| Mg24 | -2.031347 | 4.634728  | -0.245919 |
| Mg25 | -2.533601 | -2.703403 | 1.881390  |
| Mg26 | 0.600104  | 0.238508  | -2.360467 |
| Mg27 | 5.201348  | 3.380459  | -0.376957 |
| Mg28 | -2.144192 | -3.704535 | -1.099795 |

@mg28-isomer38 bp86/6-31G(d) Etot=-5602.627346 Eb=-15.15

|     |           |          |           |
|-----|-----------|----------|-----------|
| Mg1 | -2.717305 | 1.783847 | -1.034429 |
| Mg2 | -3.159396 | 3.465178 | 1.406889  |
| Mg3 | 0.204370  | 1.944070 | -2.223960 |

|      |           |           |           |
|------|-----------|-----------|-----------|
| Mg4  | -0.214133 | 0.270536  | 0.333747  |
| Mg5  | 2.023809  | -2.086038 | 1.161007  |
| Mg6  | 3.806746  | 2.243896  | -1.960600 |
| Mg7  | -1.512595 | -0.684291 | -2.381844 |
| Mg8  | 2.170144  | -0.320660 | -1.405023 |
| Mg9  | 5.165078  | -0.760610 | -1.688350 |
| Mg10 | 4.976258  | -3.306206 | 0.632682  |
| Mg11 | 1.843495  | 0.616226  | 2.631775  |
| Mg12 | -0.870362 | 4.247588  | -0.466570 |
| Mg13 | 4.314619  | 0.979604  | 0.758308  |
| Mg14 | -5.365392 | 1.349457  | 0.957150  |
| Mg15 | -1.218195 | -2.337471 | 1.534120  |
| Mg16 | 1.860500  | 2.835362  | 0.411754  |
| Mg17 | -4.520065 | -0.623560 | -1.594813 |
| Mg18 | -2.800310 | -3.187356 | -1.102935 |
| Mg19 | 1.753123  | 4.504661  | -2.119249 |
| Mg20 | 6.734688  | -0.902015 | 0.919028  |
| Mg21 | 4.366624  | -1.199443 | 2.866397  |
| Mg22 | -0.403521 | 2.746547  | 2.359094  |
| Mg23 | -2.567491 | 0.493953  | 2.158859  |
| Mg24 | -7.128507 | -0.905226 | 0.359766  |
| Mg25 | -5.845948 | -3.284326 | -0.925992 |
| Mg26 | -4.310813 | -1.808479 | 1.334037  |
| Mg27 | 0.189568  | -2.905931 | -1.162891 |
| Mg28 | 3.225011  | -3.169316 | -1.757958 |

@mg28-isomer39 bp86/6-31G(d) Etot=-5602.621652 Eb=-15.02

|      |           |           |           |
|------|-----------|-----------|-----------|
| Mg1  | -1.329260 | -1.061300 | -1.951686 |
| Mg2  | -0.843103 | 1.752662  | -3.441419 |
| Mg3  | -2.399505 | -0.762143 | 3.354175  |
| Mg4  | -2.565656 | 2.129976  | 2.439101  |
| Mg5  | -1.112820 | 1.922125  | -0.363330 |
| Mg6  | 1.120594  | 3.729350  | -1.632395 |
| Mg7  | 1.480491  | 0.690399  | -1.878470 |
| Mg8  | 1.512830  | -2.301852 | -1.784642 |
| Mg9  | -4.530511 | -2.045625 | -1.386412 |
| Mg10 | 0.027341  | -0.684505 | 0.787395  |
| Mg11 | -0.142950 | -2.719492 | 2.968047  |
| Mg12 | 3.403811  | -0.372143 | 0.194779  |
| Mg13 | -6.182244 | 0.513531  | -0.849014 |
| Mg14 | 3.940067  | 2.545853  | -1.004678 |
| Mg15 | 2.675648  | 4.704271  | 0.748154  |
| Mg16 | -2.334054 | -3.960454 | -1.770052 |
| Mg17 | -0.002911 | 1.039752  | 3.556014  |
| Mg18 | 2.745178  | -3.103048 | 1.129167  |
| Mg19 | -3.590715 | 0.941291  | -2.491414 |
| Mg20 | 5.983575  | -1.901729 | 1.180460  |
| Mg21 | -0.105945 | -3.844143 | 0.185193  |
| Mg22 | 5.986294  | 0.209329  | -1.356160 |
| Mg23 | -4.133532 | 2.765348  | -0.145964 |
| Mg24 | -3.284196 | -0.135865 | 0.582376  |
| Mg25 | 4.658770  | -2.616207 | -1.466350 |
| Mg26 | 1.923222  | 1.775426  | 1.328339  |
| Mg27 | -2.831835 | -3.075172 | 1.235091  |
| Mg28 | -0.068582 | 3.864363  | 1.833697  |

@mg28-isomer40 bp86/6-31G(d) Etot=-5602.607458 Eb=-14.70

|     |           |           |           |
|-----|-----------|-----------|-----------|
| Mg1 | -1.258331 | -1.072541 | -2.928690 |
| Mg2 | 1.513176  | -0.029811 | -1.979041 |
| Mg3 | 4.168000  | 1.077972  | -1.060682 |
| Mg4 | 0.312188  | -0.626601 | 2.002887  |
| Mg5 | -0.515350 | 2.040845  | -3.346734 |
| Mg6 | 3.125734  | -0.452988 | 1.242948  |
| Mg7 | 2.060936  | 3.042202  | -2.262648 |



|      |           |           |           |
|------|-----------|-----------|-----------|
| Mg8  | -1.233579 | -2.621130 | -0.059642 |
| Mg9  | 3.636383  | -2.092573 | -1.662011 |
| Mg10 | -4.119003 | -3.209798 | 1.420490  |
| Mg11 | -6.477680 | -2.021699 | -0.007021 |
| Mg12 | 1.754357  | -3.019081 | 0.666859  |
| Mg13 | -3.740780 | -1.346372 | -1.067784 |
| Mg14 | 0.828058  | -3.069295 | -2.254067 |
| Mg15 | 1.654608  | 2.068788  | 0.647300  |
| Mg16 | -1.125077 | 0.704314  | -0.469747 |
| Mg17 | -0.464671 | 3.754210  | -0.726323 |
| Mg18 | 5.167460  | -2.734962 | 1.005516  |
| Mg19 | -3.414470 | 1.389679  | -2.417847 |
| Mg20 | -2.688748 | -0.518031 | 1.880762  |
| Mg21 | 6.144205  | 0.133819  | 1.585775  |
| Mg22 | 6.492298  | -1.098072 | -1.063105 |
| Mg23 | 7.983781  | 2.039635  | 3.340509  |
| Mg24 | -5.409486 | 0.962684  | -0.006476 |
| Mg25 | -5.695805 | -0.794168 | 2.590284  |
| Mg26 | -3.267187 | 3.118726  | 0.112323  |
| Mg27 | -1.107472 | 2.445251  | 2.083862  |
| Mg28 | -4.323547 | 1.928997  | 2.732303  |

@mg28-isomer41 bp86/6-31G(d) Etot=-5602.598455 Eb=-14.50

|      |           |           |           |
|------|-----------|-----------|-----------|
| Mg1  | 0.646944  | 1.120650  | -0.356795 |
| Mg2  | -0.342808 | -2.102434 | -0.025459 |
| Mg3  | 4.551018  | 1.006780  | -1.433189 |
| Mg4  | 2.957162  | 3.217357  | -0.125779 |
| Mg5  | -1.368611 | 2.497853  | -2.377408 |
| Mg6  | -3.009020 | 4.987562  | -1.545468 |
| Mg7  | -1.957534 | -4.656245 | 1.565671  |
| Mg8  | 0.150136  | 4.381111  | -0.333293 |
| Mg9  | -1.621599 | -4.846261 | -1.347672 |
| Mg10 | -2.302312 | 2.883831  | 0.731303  |
| Mg11 | -0.343593 | -0.511116 | -2.791867 |
| Mg12 | 2.341880  | -1.274394 | -1.168794 |
| Mg13 | 2.252984  | -2.346751 | 1.741156  |
| Mg14 | -0.955917 | 4.868026  | 2.520394  |
| Mg15 | -1.124204 | 0.430710  | 2.232800  |
| Mg16 | 1.393465  | -0.170448 | 3.738673  |
| Mg17 | -2.785390 | -2.175770 | -2.192861 |
| Mg18 | -0.470162 | -2.521122 | 3.174776  |
| Mg19 | 3.267090  | 0.572860  | 1.376150  |
| Mg20 | 5.007992  | -1.842990 | -2.761013 |
| Mg21 | -4.412732 | -3.944562 | -0.253174 |
| Mg22 | -3.055848 | -1.747136 | 1.369834  |
| Mg23 | -2.424049 | 0.282467  | -0.646782 |
| Mg24 | 5.066848  | -1.830651 | 0.296726  |
| Mg25 | 1.103666  | 2.676500  | 2.322230  |
| Mg26 | -4.612723 | 2.279353  | -1.532862 |
| Mg27 | 7.313190  | -0.497087 | -1.351074 |
| Mg28 | -5.265873 | -0.738092 | -0.826225 |

@mg28-isomer42 bp86/6-31G(d) Etot=-5602.589723 Eb=-14.30

|      |           |           |           |
|------|-----------|-----------|-----------|
| Mg1  | -0.107243 | -0.747021 | 0.179356  |
| Mg2  | -0.753734 | -3.560341 | 0.592986  |
| Mg3  | 2.131412  | -2.814155 | -0.138938 |
| Mg4  | 4.808711  | -1.587965 | 0.736538  |
| Mg5  | 1.901236  | -0.099507 | -1.936450 |
| Mg6  | -3.104977 | -4.020145 | 2.242486  |
| Mg7  | 4.339296  | -1.939673 | -2.156794 |
| Mg8  | 2.226642  | -0.434431 | 1.977531  |
| Mg9  | 4.813518  | 0.949302  | 2.343114  |
| Mg10 | -1.950708 | 1.561711  | -0.343674 |
| Mg11 | -0.980013 | -0.305116 | -2.791995 |

|      |           |           |           |
|------|-----------|-----------|-----------|
| Mg12 | 7.465693  | -0.137738 | 1.451476  |
| Mg13 | 2.999364  | 1.968343  | 0.076945  |
| Mg14 | -2.953033 | -1.545013 | -0.748965 |
| Mg15 | 6.890278  | -0.487242 | -1.469136 |
| Mg16 | -3.138756 | 1.962667  | 3.276108  |
| Mg17 | 6.158411  | 2.110162  | -0.164980 |
| Mg18 | 4.545039  | 1.206933  | -2.496831 |
| Mg19 | -4.046532 | 3.501801  | 0.727333  |
| Mg20 | -3.884475 | -0.519114 | -3.658650 |
| Mg21 | -0.315473 | 1.167419  | 2.587195  |
| Mg22 | -2.540170 | 2.140156  | -3.532924 |
| Mg23 | -4.826440 | 1.810599  | -1.710069 |
| Mg24 | -4.804807 | 0.539007  | 1.019440  |
| Mg25 | -1.314401 | 3.947872  | 1.906574  |
| Mg26 | -5.277421 | -2.550189 | 1.090698  |
| Mg27 | -5.921517 | -1.054767 | -1.496147 |
| Mg28 | -2.359899 | -1.063556 | 2.437773  |

@mg29-isomer01 bp86/6-31G(d) Etot=-5802.819727 Eb=-17.28

|      |           |           |           |
|------|-----------|-----------|-----------|
| Mg1  | 0.447690  | -1.707764 | 0.058232  |
| Mg2  | -2.328653 | 3.278424  | 1.134125  |
| Mg3  | 0.797131  | -0.175656 | 3.014074  |
| Mg4  | -2.565563 | 0.779378  | -3.157893 |
| Mg5  | -1.391998 | -1.901906 | -2.502964 |
| Mg6  | 2.435581  | -2.537876 | 2.249575  |
| Mg7  | 3.481210  | 0.715824  | 2.232142  |
| Mg8  | -1.643726 | 0.394543  | -0.152776 |
| Mg9  | 0.343924  | 2.686193  | 2.618893  |
| Mg10 | 1.277785  | 1.171035  | 0.132881  |
| Mg11 | 0.331825  | -4.744143 | 1.271452  |
| Mg12 | 1.801542  | -2.060503 | -2.607882 |
| Mg13 | -1.062171 | -2.383157 | 2.619110  |
| Mg14 | -3.839355 | -1.618397 | 1.782202  |
| Mg15 | -1.058718 | 3.108920  | -1.832757 |
| Mg16 | 0.367098  | 0.608452  | -2.778354 |
| Mg17 | -4.679888 | 1.203417  | 1.201055  |
| Mg18 | 0.055760  | -4.463158 | -1.744529 |
| Mg19 | 2.734159  | -4.104580 | -0.390725 |
| Mg20 | 3.827323  | -1.195255 | -0.233368 |
| Mg21 | -2.332939 | -3.494087 | -0.038821 |
| Mg22 | -2.002404 | 0.637113  | 2.872344  |
| Mg23 | -4.147668 | 2.486596  | -1.322943 |
| Mg24 | 2.136796  | 3.344862  | -1.814152 |
| Mg25 | 3.271369  | 0.596722  | -2.626099 |
| Mg26 | 0.347652  | 4.684478  | 0.314851  |
| Mg27 | 4.638889  | 1.902216  | -0.364932 |
| Mg28 | 2.996112  | 3.704377  | 1.275060  |
| Mg29 | -4.238762 | -0.916067 | -1.207801 |

@mg29-isomer02 bp86/6-31G(d) Etot=-5802.816564 Eb=-17.21

|      |           |           |           |
|------|-----------|-----------|-----------|
| Mg1  | -1.682424 | 0.690819  | 3.236864  |
| Mg2  | 0.647601  | -1.021487 | 2.812668  |
| Mg3  | 0.925546  | 2.172175  | 2.959803  |
| Mg4  | -1.767930 | 3.189340  | 1.570462  |
| Mg5  | -2.162659 | -2.235186 | 2.572706  |
| Mg6  | 3.206997  | 0.268808  | 1.950017  |
| Mg7  | 4.571178  | -1.647257 | -0.192613 |
| Mg8  | 0.722324  | 4.805828  | 0.928743  |
| Mg9  | 3.068446  | -2.788636 | 2.158758  |
| Mg10 | 3.316526  | 3.206927  | 1.254785  |
| Mg11 | 0.347065  | -3.870500 | 1.492934  |
| Mg12 | 0.584039  | 1.623140  | 0.026233  |
| Mg13 | 3.657635  | 1.126303  | -1.131052 |
| Mg14 | -4.113769 | 1.029135  | 1.447292  |

|      |           |           |           |
|------|-----------|-----------|-----------|
| Mg15 | 1.256847  | -1.245028 | -0.230267 |
| Mg16 | 2.337254  | 3.950702  | -1.521446 |
| Mg17 | -1.600855 | -0.429817 | 0.226749  |
| Mg18 | -2.383493 | -4.002113 | 0.118237  |
| Mg19 | -3.488255 | 2.992286  | -0.932048 |
| Mg20 | 1.252582  | 1.434322  | -2.971769 |
| Mg21 | -4.560646 | -1.905897 | 0.558618  |
| Mg22 | -4.591883 | 0.196517  | -1.529123 |
| Mg23 | 2.758090  | -4.134179 | -0.559099 |
| Mg24 | 2.813116  | -1.510393 | -2.699388 |
| Mg25 | -0.681827 | 3.920117  | -1.720318 |
| Mg26 | 0.017455  | -3.695335 | -1.761250 |
| Mg27 | -0.043309 | -1.163644 | -3.338284 |
| Mg28 | -2.661963 | -2.036168 | -2.226815 |
| Mg29 | -1.743685 | 1.079220  | -2.501399 |

@mg29-isomer03 bp86/6-31G(d) Etot=-5802.808935 Eb=-17.04

|      |           |           |           |
|------|-----------|-----------|-----------|
| Mg1  | 0.604391  | -0.295832 | -2.645343 |
| Mg2  | 3.698322  | 0.146920  | -2.087239 |
| Mg3  | -0.727578 | 1.722060  | -0.204686 |
| Mg4  | -4.329479 | -1.070373 | 1.303436  |
| Mg5  | 0.576098  | -1.382853 | 2.734326  |
| Mg6  | -2.208609 | -3.265983 | 2.045373  |
| Mg7  | -3.654266 | 0.710311  | -1.150955 |
| Mg8  | -0.351612 | 4.705042  | -1.298375 |
| Mg9  | 4.057753  | 2.515368  | -0.040860 |
| Mg10 | -0.676318 | -3.219910 | -2.139389 |
| Mg11 | 0.560193  | -3.821555 | 0.784821  |
| Mg12 | 3.226262  | -2.446351 | 1.605749  |
| Mg13 | -0.181295 | 1.633967  | 2.747706  |
| Mg14 | 1.653172  | -0.094758 | 0.180999  |
| Mg15 | -1.409287 | 2.123995  | -3.021915 |
| Mg16 | -2.219614 | -0.862176 | -3.181881 |
| Mg17 | 2.807983  | 1.141085  | 2.599889  |
| Mg18 | -3.127831 | 3.769833  | -0.915561 |
| Mg19 | -1.246323 | -1.108282 | 0.122636  |
| Mg20 | -3.200978 | 1.880880  | 1.714147  |
| Mg21 | 5.060801  | -2.331377 | -0.898563 |
| Mg22 | -3.658136 | -2.677471 | -1.206449 |
| Mg23 | -2.200288 | -0.472049 | 3.276150  |
| Mg24 | 5.101108  | -0.082505 | 0.980959  |
| Mg25 | 1.500345  | 3.661281  | 1.100953  |
| Mg26 | -1.459348 | 4.425032  | 1.525209  |
| Mg27 | 1.685805  | 2.496866  | -1.989868 |
| Mg28 | 2.218763  | -2.719615 | -1.682301 |
| Mg29 | -2.100034 | -5.081550 | -0.258967 |

@mg29-isomer04 bp86/6-31G(d) Etot=-5802.803626 Eb=-16.93

|      |           |           |           |
|------|-----------|-----------|-----------|
| Mg1  | 2.095681  | -0.325292 | -0.000025 |
| Mg2  | -0.744247 | -0.140859 | 0.000037  |
| Mg3  | -1.700538 | -1.642830 | -2.773642 |
| Mg4  | 1.035388  | -0.299054 | -3.168259 |
| Mg5  | 0.781682  | -2.873549 | -1.540304 |
| Mg6  | 1.307491  | 2.330151  | 1.565818  |
| Mg7  | -4.291801 | -2.441452 | 1.529792  |
| Mg8  | 0.781651  | -2.873471 | 1.540135  |
| Mg9  | 1.035365  | -0.299123 | 3.168274  |
| Mg10 | -4.077348 | 0.216281  | 3.075582  |
| Mg11 | -1.195342 | 3.102797  | 0.000051  |
| Mg12 | -1.390745 | 1.529592  | 2.730666  |
| Mg13 | -3.770197 | 2.882642  | 1.525226  |
| Mg14 | 5.012570  | -0.649244 | 0.000011  |
| Mg15 | 4.050088  | 2.364899  | 0.000059  |
| Mg16 | -4.077353 | 0.216369  | -3.075607 |

|      |           |           |           |
|------|-----------|-----------|-----------|
| Mg17 | 1.307486  | 2.330181  | -1.565749 |
| Mg18 | -1.390731 | 1.529650  | -2.730596 |
| Mg19 | -3.770179 | 2.882710  | -1.525186 |
| Mg20 | 3.440888  | -3.355110 | -0.000038 |
| Mg21 | -1.700557 | -1.642954 | 2.773696  |
| Mg22 | -1.848006 | -3.212670 | -0.000051 |
| Mg23 | -4.291818 | -2.441423 | -1.529874 |
| Mg24 | 3.796447  | 0.901307  | -2.580717 |
| Mg25 | 3.796423  | 0.901217  | 2.580780  |
| Mg26 | -3.661052 | 0.185843  | -0.000020 |
| Mg27 | 3.513731  | -2.039150 | 2.635370  |
| Mg28 | 3.513769  | -2.039071 | -2.635396 |
| Mg29 | 2.441256  | 4.901613  | -0.000033 |

@mg29-isomer05 bp86/6-31G(d) Etot=-5802.803029 Eb=-16.92

|      |           |           |           |
|------|-----------|-----------|-----------|
| Mg1  | 3.311662  | -0.747963 | 2.897731  |
| Mg2  | 0.290782  | -1.996475 | 2.517573  |
| Mg3  | 1.526988  | 0.173552  | 0.482771  |
| Mg4  | 0.683962  | 0.700232  | 3.695443  |
| Mg5  | 4.639510  | -0.970392 | 0.102767  |
| Mg6  | 1.612586  | 3.147230  | -3.003083 |
| Mg7  | 2.607816  | -1.769296 | -2.042428 |
| Mg8  | 1.818869  | 3.115533  | 2.285183  |
| Mg9  | -2.873295 | 3.531316  | -0.174912 |
| Mg10 | 2.995696  | 3.864749  | -0.372964 |
| Mg11 | 4.606935  | -3.900664 | -1.155978 |
| Mg12 | 0.085303  | 2.834490  | -0.386148 |
| Mg13 | -2.544657 | -0.579930 | -2.963151 |
| Mg14 | -4.339795 | 1.459032  | -1.713226 |
| Mg15 | -2.458525 | -2.988476 | 1.292187  |
| Mg16 | -1.385691 | 2.298733  | 2.195990  |
| Mg17 | -1.769947 | 2.489027  | -2.812885 |
| Mg18 | -4.128147 | 1.155641  | 1.363956  |
| Mg19 | -1.542719 | 0.025691  | 0.032014  |
| Mg20 | -4.370304 | -1.354155 | -0.531169 |
| Mg21 | -2.210242 | -0.453366 | 3.216995  |
| Mg22 | 0.117213  | -2.601748 | -0.425134 |
| Mg23 | 3.503255  | 1.161207  | -1.761468 |
| Mg24 | 4.287161  | 1.755125  | 1.343187  |
| Mg25 | 2.765289  | -3.123898 | 1.074485  |
| Mg26 | -2.568424 | -3.446163 | -1.731791 |
| Mg27 | -4.849282 | -1.615911 | 2.481317  |
| Mg28 | 0.392134  | 0.330511  | -2.481287 |
| Mg29 | -0.204129 | -2.493633 | -3.425975 |

@mg29-isomer06 bp86/6-31G(d) Etot=-5802.801602 Eb=-16.89

|      |           |           |           |
|------|-----------|-----------|-----------|
| Mg1  | 2.301390  | 0.180839  | -0.000012 |
| Mg2  | -0.458684 | -0.352837 | 0.000028  |
| Mg3  | -1.032201 | -1.977605 | -2.801468 |
| Mg4  | 1.289408  | -0.006697 | -3.091052 |
| Mg5  | 1.684114  | -2.683762 | -1.548356 |
| Mg6  | 0.928056  | 2.690585  | 1.565252  |
| Mg7  | -3.439014 | -3.325996 | 1.535740  |
| Mg8  | 1.684048  | -2.683541 | 1.548345  |
| Mg9  | 1.289347  | -0.006570 | 3.091135  |
| Mg10 | -3.792396 | -0.753934 | 3.107967  |
| Mg11 | -1.675023 | 2.598630  | -0.000077 |
| Mg12 | -1.475690 | 1.164039  | 2.749432  |
| Mg13 | -4.202426 | 1.890611  | 1.572782  |
| Mg14 | 5.165187  | 0.601471  | 0.000019  |
| Mg15 | 3.450498  | 3.358289  | -0.000045 |
| Mg16 | -3.792373 | -0.754014 | -3.107969 |
| Mg17 | 0.928091  | 2.690616  | -1.565379 |
| Mg18 | -1.475627 | 1.163958  | -2.749520 |

|      |           |           |           |
|------|-----------|-----------|-----------|
| Mg19 | -4.202388 | 1.890611  | -1.572925 |
| Mg20 | 4.248848  | -2.543597 | 0.000074  |
| Mg21 | -1.032227 | -1.977565 | 2.801588  |
| Mg22 | -0.822597 | -3.493951 | 0.000047  |
| Mg23 | -3.439006 | -3.326072 | -1.535705 |
| Mg24 | 3.666800  | 1.884126  | -2.549449 |
| Mg25 | 3.666754  | 1.884190  | 2.549402  |
| Mg26 | -3.474764 | -0.628198 | -0.000020 |
| Mg27 | 4.083158  | -1.081766 | 2.562860  |
| Mg28 | 4.083198  | -1.081837 | -2.562741 |
| Mg29 | -4.154480 | 4.679977  | 0.000048  |

@mg29-isomer07 bp86/6-31G(d) Etot=-5802.800507 Eb=-16.86

|      |           |           |           |
|------|-----------|-----------|-----------|
| Mg1  | 0.330644  | -3.162279 | 0.006017  |
| Mg2  | 2.771765  | -3.347013 | 2.011307  |
| Mg3  | 1.628072  | -0.405448 | 0.117624  |
| Mg4  | -1.470545 | -0.312599 | -0.105184 |
| Mg5  | 1.122223  | -1.818965 | -2.700467 |
| Mg6  | 0.081138  | -2.269260 | 2.901694  |
| Mg7  | 3.940447  | -0.641640 | -2.113950 |
| Mg8  | 2.558517  | 3.661577  | -0.648205 |
| Mg9  | 2.894446  | -0.430551 | 2.938232  |
| Mg10 | -1.856094 | -2.636710 | -2.045055 |
| Mg11 | -2.538657 | -3.096119 | 1.176491  |
| Mg12 | -4.697021 | -2.880743 | -1.068232 |
| Mg13 | -1.143993 | -0.222910 | -3.777103 |
| Mg14 | -4.441169 | -0.630507 | 0.905112  |
| Mg15 | 4.179675  | 1.344277  | 0.352910  |
| Mg16 | -0.075585 | 0.697697  | 2.670297  |
| Mg17 | -2.939306 | 1.775953  | 2.061140  |
| Mg18 | 4.201208  | 2.293311  | -2.728046 |
| Mg19 | 4.710951  | -1.529975 | 0.764927  |
| Mg20 | -3.901898 | -0.292458 | -2.407797 |
| Mg21 | 2.295028  | 2.674508  | 2.289972  |
| Mg22 | 1.265707  | 1.269831  | -2.594885 |
| Mg23 | 3.198772  | -3.355716 | -0.999181 |
| Mg24 | -0.600799 | 3.708757  | 2.512847  |
| Mg25 | -2.623697 | -1.003219 | 3.287811  |
| Mg26 | -2.019663 | 2.223786  | -2.325428 |
| Mg27 | -4.389234 | 1.990311  | -0.561884 |
| Mg28 | -2.461999 | 4.161138  | 0.132915  |
| Mg29 | -0.018933 | 2.234966  | -0.053880 |

@mg29-isomer08 bp86/6-31G(d) Etot=-5802.797264 Eb=-16.79

|      |           |           |           |
|------|-----------|-----------|-----------|
| Mg1  | -0.571064 | 2.351150  | -0.627724 |
| Mg2  | -1.673235 | -0.449504 | 0.091503  |
| Mg3  | -3.924399 | 0.838021  | 1.924530  |
| Mg4  | -4.389763 | -2.280465 | 1.702161  |
| Mg5  | -5.064759 | -0.494918 | -0.621654 |
| Mg6  | 2.579647  | 3.252369  | -0.450709 |
| Mg7  | -2.512802 | 3.396713  | 1.585569  |
| Mg8  | 1.207246  | 3.107936  | -3.115868 |
| Mg9  | 3.256658  | 1.007431  | -2.412591 |
| Mg10 | -3.621667 | -2.991491 | -1.163621 |
| Mg11 | -1.645853 | -3.426656 | 1.130084  |
| Mg12 | 0.592554  | -1.766629 | 2.605421  |
| Mg13 | 4.256038  | 0.950729  | 0.790191  |
| Mg14 | 0.117847  | 0.194286  | -2.839980 |
| Mg15 | 1.444887  | -0.020723 | 0.045980  |
| Mg16 | -2.191574 | -1.097369 | 3.342083  |
| Mg17 | -0.832663 | -2.577077 | -2.117022 |
| Mg18 | 2.744654  | 0.117266  | 3.470428  |
| Mg19 | 3.661124  | -2.004272 | 1.567728  |
| Mg20 | 0.329665  | 4.184447  | 1.584308  |

|      |           |           |           |
|------|-----------|-----------|-----------|
| Mg21 | -3.653037 | 2.117829  | -0.966758 |
| Mg22 | 4.868576  | -1.227877 | -1.184944 |
| Mg23 | -0.244900 | 1.220132  | 2.493393  |
| Mg24 | 2.261774  | -1.932676 | -2.512868 |
| Mg25 | -3.007447 | -0.463760 | -2.877864 |
| Mg26 | 4.058852  | -4.044503 | -0.697511 |
| Mg27 | -1.990658 | 2.339470  | -3.385828 |
| Mg28 | 2.755675  | 2.879976  | 2.581724  |
| Mg29 | 1.188625  | -3.179834 | 0.059837  |

@mg29-isomer09 bp86/6-31G(d) Etot=-5802.796897 Eb=-16.78

|      |           |           |           |
|------|-----------|-----------|-----------|
| Mg1  | 4.867346  | 0.367836  | -0.444642 |
| Mg2  | 3.357952  | -0.939678 | -2.712000 |
| Mg3  | 4.335103  | -2.524077 | -0.121745 |
| Mg4  | 3.054594  | 2.334696  | -1.887855 |
| Mg5  | 1.229068  | 0.913584  | -3.856307 |
| Mg6  | 2.056621  | -3.567395 | -1.632724 |
| Mg7  | 3.321844  | 2.357148  | 1.213246  |
| Mg8  | 3.551694  | -0.689740 | 2.193568  |
| Mg9  | 1.633461  | -0.231575 | -0.204196 |
| Mg10 | 1.520135  | 4.509324  | -0.180037 |
| Mg11 | 0.072635  | -1.586393 | -2.608712 |
| Mg12 | -3.234683 | 2.336734  | -1.129924 |
| Mg13 | -0.085884 | 2.266695  | -1.594959 |
| Mg14 | 1.824026  | -3.333197 | 1.387885  |
| Mg15 | -1.547229 | 4.493202  | 0.299487  |
| Mg16 | 0.164319  | 2.153960  | 1.499152  |
| Mg17 | -0.828659 | -3.649531 | -0.589263 |
| Mg18 | -1.347655 | -0.229993 | 0.020823  |
| Mg19 | 1.997963  | 1.411011  | 3.698299  |
| Mg20 | -1.870916 | 0.649346  | -3.346196 |
| Mg21 | -3.099416 | 2.084093  | 1.866227  |
| Mg22 | 0.370408  | -0.995649 | 2.633890  |
| Mg23 | -1.204625 | -3.472107 | 2.362310  |
| Mg24 | -4.496067 | -0.228307 | 0.258442  |
| Mg25 | -1.186929 | 1.201665  | 3.992992  |
| Mg26 | -3.632270 | -3.110551 | 0.728960  |
| Mg27 | -3.003788 | -1.947853 | -1.997701 |
| Mg28 | -4.846706 | 0.355883  | -2.707024 |
| Mg29 | -2.972342 | -0.929131 | 2.858006  |

@mg29-isomer10 bp86/6-31G(d) Etot=-5802.796049 Eb=-16.77

|      |           |           |           |
|------|-----------|-----------|-----------|
| Mg1  | -0.150845 | 5.628666  | -1.068226 |
| Mg2  | 1.472350  | 1.743204  | -2.603002 |
| Mg3  | 2.575329  | 4.051015  | -0.875769 |
| Mg4  | -1.607119 | 1.523977  | -2.503220 |
| Mg5  | -2.703054 | 4.067015  | -1.086806 |
| Mg6  | 0.083737  | 2.520197  | -0.061911 |
| Mg7  | -2.522259 | 2.483257  | 1.582550  |
| Mg8  | -3.077646 | -1.206372 | -2.323932 |
| Mg9  | 4.116320  | 1.300541  | -0.974200 |
| Mg10 | 0.180535  | -0.982752 | -2.389534 |
| Mg11 | -5.052159 | 1.059181  | 2.077894  |
| Mg12 | 3.137295  | -0.743179 | -3.051448 |
| Mg13 | -4.088608 | 1.319701  | -0.869060 |
| Mg14 | 2.961502  | 2.369714  | 1.695852  |
| Mg15 | 1.731153  | -0.142807 | 0.288325  |
| Mg16 | -1.322127 | -0.327810 | 0.209991  |
| Mg17 | 0.128863  | 1.282003  | 2.695833  |
| Mg18 | 4.807843  | -0.147750 | 1.617086  |
| Mg19 | 2.110528  | -3.552193 | -2.581921 |
| Mg20 | -1.071820 | -3.715486 | -2.011517 |
| Mg21 | -2.583993 | -0.445519 | 2.989713  |
| Mg22 | 2.652312  | -0.001419 | 3.663457  |

|      |           |           |           |
|------|-----------|-----------|-----------|
| Mg23 | -3.829821 | -3.905719 | -1.026446 |
| Mg24 | -4.406601 | -1.419379 | 0.570388  |
| Mg25 | 4.031001  | -2.194745 | -0.578704 |
| Mg26 | 0.937253  | -3.019340 | 0.197383  |
| Mg27 | 0.266172  | -1.719905 | 2.863426  |
| Mg28 | 3.215488  | -2.580113 | 2.256918  |
| Mg29 | -1.991629 | -3.243983 | 1.296880  |

@mg29-isomer11 bp86/6-31G(d) Etot=-5802.795166 Eb=-16.75

|      |           |           |           |
|------|-----------|-----------|-----------|
| Mg1  | 3.171155  | 3.268645  | -1.116082 |
| Mg2  | 1.667386  | -2.061743 | 2.857731  |
| Mg3  | -4.512799 | 0.578393  | -0.466221 |
| Mg4  | -2.960311 | -1.142414 | -2.494401 |
| Mg5  | 3.048771  | 0.685029  | -2.688606 |
| Mg6  | 0.948264  | 0.879705  | 2.871067  |
| Mg7  | 3.823937  | 0.142522  | 3.073186  |
| Mg8  | 2.206508  | -3.559973 | -0.286698 |
| Mg9  | 1.532282  | -0.515949 | 0.002455  |
| Mg10 | -3.721092 | -1.831167 | 1.598608  |
| Mg11 | 2.150627  | -2.223996 | -3.173582 |
| Mg12 | 0.018793  | 0.066137  | -2.641523 |
| Mg13 | -2.989876 | -3.678395 | -0.676074 |
| Mg14 | 4.498899  | -1.889300 | -1.557512 |
| Mg15 | -3.913285 | 0.973326  | 2.550828  |
| Mg16 | -5.446838 | -2.208220 | -0.952036 |
| Mg17 | 0.848932  | 2.936237  | -2.877631 |
| Mg18 | -1.393605 | 4.518849  | -1.469121 |
| Mg19 | -0.385353 | -2.756165 | -1.787147 |
| Mg20 | -1.452950 | -0.742361 | 3.432232  |
| Mg21 | 3.018696  | 2.804018  | 1.834551  |
| Mg22 | -0.682176 | -2.727006 | 1.181284  |
| Mg23 | 0.361528  | 2.416744  | 0.151975  |
| Mg24 | -3.096230 | 3.095915  | 0.465927  |
| Mg25 | 4.385050  | 0.687278  | 0.062979  |
| Mg26 | -1.551803 | 0.070364  | 0.211388  |
| Mg27 | -2.459082 | 1.897291  | -2.353710 |
| Mg28 | -1.444729 | 2.567951  | 2.862164  |
| Mg29 | 4.329301  | -2.251716 | 1.383972  |

@mg29-isomer12 bp86/6-31G(d) Etot=-5802.794868 Eb=-16.74

|      |           |           |           |
|------|-----------|-----------|-----------|
| Mg1  | 2.910093  | 2.079505  | 2.794851  |
| Mg2  | 1.622801  | -0.002705 | -0.368469 |
| Mg3  | 3.444465  | -0.794463 | 2.106632  |
| Mg4  | 3.895593  | -3.751925 | 1.630474  |
| Mg5  | -0.243473 | 2.414610  | -0.208431 |
| Mg6  | -1.448165 | -0.321820 | -0.069648 |
| Mg7  | -1.185976 | -3.358712 | 0.552686  |
| Mg8  | 0.059969  | 3.367851  | 2.692162  |
| Mg9  | 0.412137  | 0.336720  | 2.463287  |
| Mg10 | -3.502118 | 2.005679  | -0.537152 |
| Mg11 | -1.710352 | 2.706459  | -2.841957 |
| Mg12 | -2.058604 | -1.491143 | 2.881537  |
| Mg13 | -4.382927 | -0.419756 | 1.162769  |
| Mg14 | 2.491197  | -1.967660 | -3.067427 |
| Mg15 | 2.389369  | 3.947065  | 0.625748  |
| Mg16 | 2.261356  | 2.704320  | -2.079338 |
| Mg17 | -2.500418 | 4.241338  | 1.154277  |
| Mg18 | -4.045850 | -3.397992 | 1.557942  |
| Mg19 | 4.035581  | 0.488224  | -2.881280 |
| Mg20 | -3.480389 | -2.471088 | -1.272352 |
| Mg21 | 1.741655  | -3.022150 | -0.318250 |
| Mg22 | -0.492309 | -2.265766 | -2.348109 |
| Mg23 | -2.590186 | -0.144567 | -3.135635 |
| Mg24 | 0.471872  | 0.491335  | -3.224559 |

|      |           |           |           |
|------|-----------|-----------|-----------|
| Mg25 | 4.434997  | -1.662906 | -0.745559 |
| Mg26 | 4.233168  | 1.493775  | 0.076495  |
| Mg27 | -5.241024 | -0.135444 | -1.759012 |
| Mg28 | 0.999021  | -2.648066 | 2.634832  |
| Mg29 | -2.521480 | 1.579284  | 2.523487  |

@mg29-isomer13 bp86/6-31G(d) Etot=-5802.793616 Eb=-16.71

|      |           |           |           |
|------|-----------|-----------|-----------|
| Mg1  | 1.319982  | -1.260556 | -0.130937 |
| Mg2  | 0.820231  | 1.544617  | 0.171558  |
| Mg3  | 1.283161  | -0.188712 | 2.831564  |
| Mg4  | 1.092171  | 4.991065  | 0.375769  |
| Mg5  | 1.412717  | 0.234910  | -3.773578 |
| Mg6  | 3.858195  | 0.570787  | 1.379101  |
| Mg7  | -1.147537 | 1.682860  | 2.637128  |
| Mg8  | -0.928225 | 1.437454  | -2.466904 |
| Mg9  | -1.722581 | -0.178115 | 0.057161  |
| Mg10 | -0.989170 | -3.414240 | -0.025360 |
| Mg11 | 0.897872  | -3.254723 | 2.266646  |
| Mg12 | -1.512564 | 3.687193  | -0.061231 |
| Mg13 | -3.428406 | -2.966571 | -1.728758 |
| Mg14 | 4.655294  | -1.851971 | -0.495834 |
| Mg15 | -3.755812 | 2.194052  | -1.533075 |
| Mg16 | -3.718779 | -2.779664 | 1.247469  |
| Mg17 | -4.861737 | -0.424817 | -0.323494 |
| Mg18 | -4.042914 | -0.134204 | 2.608569  |
| Mg19 | 3.615943  | 3.291664  | 0.093961  |
| Mg20 | 3.600598  | 0.669407  | -1.691181 |
| Mg21 | 2.674257  | -4.161725 | -0.080708 |
| Mg22 | 2.625771  | -2.258690 | -2.668137 |
| Mg23 | 1.757635  | 2.978392  | -2.304891 |
| Mg24 | -3.380833 | -0.359496 | -3.029866 |
| Mg25 | -0.610299 | -1.679144 | -2.608400 |
| Mg26 | 2.013137  | 2.829622  | 2.651833  |
| Mg27 | -3.825269 | 2.529460  | 1.451412  |
| Mg28 | -1.403967 | -1.475795 | 2.888184  |
| Mg29 | 3.701130  | -2.253059 | 2.261996  |

@mg29-isomer14 bp86/6-31G(d) Etot=-5802.791606 Eb=-16.67

|      |           |           |           |
|------|-----------|-----------|-----------|
| Mg1  | -2.527457 | 4.329675  | -0.836075 |
| Mg2  | -0.512175 | 0.670580  | 2.557635  |
| Mg3  | 0.100273  | -2.199326 | 2.114469  |
| Mg4  | 0.009911  | 4.984155  | 0.637873  |
| Mg5  | -3.828400 | 0.047852  | 1.964045  |
| Mg6  | 4.160389  | 1.695674  | 1.532123  |
| Mg7  | 2.626950  | -3.285622 | 1.034587  |
| Mg8  | -2.484086 | 2.916657  | 1.882526  |
| Mg9  | 4.259158  | 0.774252  | -1.417949 |
| Mg10 | -3.430372 | -0.517139 | -2.978999 |
| Mg11 | 4.765758  | -1.147316 | 1.209710  |
| Mg12 | -0.311724 | 2.035228  | -0.236904 |
| Mg13 | 0.965887  | -2.798769 | -1.512009 |
| Mg14 | 2.680040  | 3.352355  | -0.482406 |
| Mg15 | -4.728447 | -1.471017 | -0.502012 |
| Mg16 | -3.763222 | 1.493818  | -0.683315 |
| Mg17 | 4.189684  | -2.355334 | -1.405706 |
| Mg18 | 1.493846  | 2.801323  | 2.288480  |
| Mg19 | 2.416488  | -0.295679 | 3.061290  |
| Mg20 | -2.192745 | -1.457240 | 3.875942  |
| Mg21 | 2.614975  | -0.914709 | -3.378355 |
| Mg22 | -1.390658 | -0.707053 | -0.161985 |
| Mg23 | -0.602079 | -4.584488 | 0.358469  |
| Mg24 | -1.742757 | 1.979114  | -2.852508 |
| Mg25 | 1.413312  | 1.754946  | -2.692532 |
| Mg26 | -0.412248 | -0.725585 | -3.137026 |



|      |           |           |           |
|------|-----------|-----------|-----------|
| Mg27 | -3.057177 | -3.021571 | 1.400012  |
| Mg28 | -2.388044 | -3.145530 | -1.682296 |
| Mg29 | 1.674919  | -0.209252 | 0.042914  |

@mg29-isomer15 bp86/6-31G(d) Etot=-5802.791207 Eb=-16.66

|      |           |           |           |
|------|-----------|-----------|-----------|
| Mg1  | -2.139760 | 1.723333  | -3.665512 |
| Mg2  | -1.588822 | -0.260523 | 0.157367  |
| Mg3  | -2.489958 | -1.217872 | -2.829808 |
| Mg4  | -2.545156 | -4.038932 | -2.025338 |
| Mg5  | -0.045040 | 2.467062  | 0.143794  |
| Mg6  | 1.691540  | -0.030599 | 0.173625  |
| Mg7  | 0.267750  | -2.599351 | -1.009189 |
| Mg8  | 0.754055  | 3.241352  | -2.694539 |
| Mg9  | 0.108790  | 0.288605  | -2.375859 |
| Mg10 | 4.311565  | 1.613529  | 0.821218  |
| Mg11 | 2.099519  | 2.835587  | 2.380881  |
| Mg12 | 2.563284  | -1.419005 | -2.918077 |
| Mg13 | 4.581628  | -1.048503 | -0.796661 |
| Mg14 | -2.954533 | -1.528402 | 2.707940  |
| Mg15 | -2.344069 | 3.667439  | -1.512257 |
| Mg16 | -2.914016 | 2.581040  | 1.228626  |
| Mg17 | 2.719166  | 3.844322  | -0.449610 |
| Mg18 | 3.233811  | -3.838650 | -1.376870 |
| Mg19 | -3.371446 | 1.253889  | 3.864197  |
| Mg20 | 2.809665  | -2.733794 | 1.321711  |
| Mg21 | -1.975029 | -3.645687 | 0.813830  |
| Mg22 | 0.076318  | -1.920993 | 2.238789  |
| Mg23 | 2.412833  | -0.062330 | 3.151100  |
| Mg24 | -0.496706 | 1.023953  | 2.913183  |
| Mg25 | -4.240268 | -2.030331 | -0.366604 |
| Mg26 | -4.001390 | 1.030054  | -1.325511 |
| Mg27 | 5.124381  | -0.991579 | 2.159719  |
| Mg28 | -4.938080 | 0.287380  | 1.476409  |
| Mg29 | 3.289969  | 1.509006  | -2.206556 |

@mg29-isomer16 bp86/6-31G(d) Etot=-5802.790130 Eb=-16.64

|      |           |           |           |
|------|-----------|-----------|-----------|
| Mg1  | -4.168921 | 0.040977  | 0.238597  |
| Mg2  | -0.826940 | 1.424773  | 0.217819  |
| Mg3  | -3.782740 | -0.835323 | -2.556951 |
| Mg4  | -3.667738 | 2.970799  | 1.112595  |
| Mg5  | -1.777962 | 4.675009  | -0.384509 |
| Mg6  | 1.555630  | -0.257973 | -0.317693 |
| Mg7  | 4.321765  | -0.336281 | -2.326418 |
| Mg8  | 0.213424  | 2.761710  | -2.280512 |
| Mg9  | 2.216690  | 2.247235  | 1.531294  |
| Mg10 | 0.262063  | 0.426424  | 3.089812  |
| Mg11 | -1.618619 | -3.042214 | -2.021185 |
| Mg12 | -0.726447 | 3.342163  | 2.360921  |
| Mg13 | -3.006153 | 2.139551  | -1.863268 |
| Mg14 | -2.726296 | 0.634392  | 2.796003  |
| Mg15 | 3.133316  | 2.381724  | -1.410783 |
| Mg16 | 1.183712  | 4.572608  | -0.015059 |
| Mg17 | 3.242820  | 0.041906  | 3.340999  |
| Mg18 | 1.501850  | -2.180183 | 2.138405  |
| Mg19 | 1.946595  | 0.745301  | -3.677842 |
| Mg20 | -1.196784 | -1.454029 | 0.647529  |
| Mg21 | 0.754845  | -3.809148 | -0.249746 |
| Mg22 | -2.113971 | -4.380329 | 0.807681  |
| Mg23 | -0.780789 | -0.135058 | -2.483324 |
| Mg24 | 1.483597  | -2.127689 | -2.737523 |
| Mg25 | -3.788695 | -2.248375 | 2.309259  |
| Mg26 | 4.660407  | -2.277011 | 2.189251  |
| Mg27 | -4.412136 | -2.988168 | -0.524388 |
| Mg28 | 3.607536  | -2.663007 | -0.511908 |

|                                                          |           |           |           |
|----------------------------------------------------------|-----------|-----------|-----------|
| Mg29                                                     | 4.509941  | 0.330215  | 0.580942  |
| @mg29-isomer17 bp86/6-31G(d) Etot=-5802.789324 Eb=-16.62 |           |           |           |
| Mg1                                                      | 0.550367  | 0.228958  | 0.111226  |
| Mg2                                                      | 1.873366  | 1.506305  | 2.858233  |
| Mg3                                                      | -2.899133 | -0.692631 | 3.387973  |
| Mg4                                                      | 3.025898  | -0.903556 | 1.477311  |
| Mg5                                                      | 5.911795  | 1.460452  | -0.601735 |
| Mg6                                                      | -1.326056 | -2.579518 | -1.487389 |
| Mg7                                                      | -2.395832 | -0.273468 | 0.224061  |
| Mg8                                                      | -2.011079 | -2.994262 | 1.568555  |
| Mg9                                                      | -1.883960 | 2.657837  | -0.326022 |
| Mg10                                                     | -0.255088 | -0.124749 | -2.906400 |
| Mg11                                                     | 3.159774  | 2.360704  | 0.140358  |
| Mg12                                                     | -4.647474 | 2.347098  | -1.644295 |
| Mg13                                                     | 0.815085  | 2.560461  | -1.895702 |
| Mg14                                                     | -2.007023 | 2.301427  | -3.270990 |
| Mg15                                                     | 0.102302  | -1.149014 | 2.855393  |
| Mg16                                                     | -5.973483 | -0.038676 | -0.686462 |
| Mg17                                                     | -3.440569 | -0.320644 | -2.631668 |
| Mg18                                                     | 6.065525  | -1.117945 | 0.881476  |
| Mg19                                                     | 0.902196  | -2.985807 | 0.514491  |
| Mg20                                                     | 4.986096  | 1.288593  | 2.366041  |
| Mg21                                                     | 5.792401  | -1.058096 | -2.180412 |
| Mg22                                                     | -4.392127 | 1.551045  | 1.457759  |
| Mg23                                                     | -1.182038 | 1.608288  | 2.477872  |
| Mg24                                                     | 1.489895  | -2.565519 | -2.492985 |
| Mg25                                                     | 0.617665  | 3.598916  | 1.070808  |
| Mg26                                                     | -4.322360 | -2.563025 | -0.650804 |
| Mg27                                                     | -5.349463 | -1.418810 | 1.888171  |
| Mg28                                                     | 2.961955  | 0.121433  | -1.835329 |
| Mg29                                                     | 3.831366  | -2.805798 | -0.669534 |
| @mg29-isomer18 bp86/6-31G(d) Etot=-5802.789323 Eb=-16.62 |           |           |           |
| Mg1                                                      | 0.272579  | -2.120880 | -2.610751 |
| Mg2                                                      | 4.578909  | -2.317699 | 0.634500  |
| Mg3                                                      | 1.584969  | 0.923569  | 3.013759  |
| Mg4                                                      | -1.543501 | 1.050486  | 3.384508  |
| Mg5                                                      | -1.287032 | -1.939606 | 0.005595  |
| Mg6                                                      | -1.224820 | 0.941849  | 0.391092  |
| Mg7                                                      | -0.562311 | -4.752753 | -1.146338 |
| Mg8                                                      | -4.290005 | 0.854858  | 1.817286  |
| Mg9                                                      | 0.720417  | 2.814705  | -1.452425 |
| Mg10                                                     | 0.121133  | 3.269987  | 1.699242  |
| Mg11                                                     | 2.064216  | 0.396271  | -3.058482 |
| Mg12                                                     | 2.953575  | 2.519549  | 0.638249  |
| Mg13                                                     | -4.512451 | -1.630670 | 0.035344  |
| Mg14                                                     | 3.648041  | 2.902319  | -2.387532 |
| Mg15                                                     | 4.509437  | 0.341137  | -1.035547 |
| Mg16                                                     | -2.304243 | 3.412888  | -2.150493 |
| Mg17                                                     | 1.613686  | -3.324934 | 0.519929  |
| Mg18                                                     | 4.420975  | 0.328457  | 2.012297  |
| Mg19                                                     | 2.879541  | -1.995585 | 3.013468  |
| Mg20                                                     | 1.509187  | -0.262589 | 0.000770  |
| Mg21                                                     | -3.871198 | 0.942585  | -1.350914 |
| Mg22                                                     | -0.972566 | 5.291531  | -0.304853 |
| Mg23                                                     | 3.203726  | -2.221881 | -1.945862 |
| Mg24                                                     | -2.965088 | -1.810255 | -2.568684 |
| Mg25                                                     | -3.053523 | 3.432903  | 0.846504  |
| Mg26                                                     | -3.036161 | -1.647732 | 2.640091  |
| Mg27                                                     | -0.959320 | 0.563008  | -2.599067 |
| Mg28                                                     | -3.492584 | -4.383410 | -0.728334 |
| Mg29                                                     | -0.005586 | -1.578108 | 2.686647  |

@mg29-isomer19 bp86/6-31G(d) Etot=-5802.778519 Eb=-16.39

|      |           |           |           |
|------|-----------|-----------|-----------|
| Mg1  | -0.826588 | 0.333625  | 0.319073  |
| Mg2  | -3.833311 | -1.679989 | 1.861122  |
| Mg3  | -1.269066 | 3.354835  | -2.282164 |
| Mg4  | 0.209633  | -2.224668 | -1.398625 |
| Mg5  | 3.466587  | -2.478211 | -1.736336 |
| Mg6  | 1.786319  | -0.748484 | -3.529832 |
| Mg7  | -1.400093 | -0.597807 | 3.187721  |
| Mg8  | -2.758199 | -1.603407 | -1.157921 |
| Mg9  | -0.693304 | 2.486748  | 2.653792  |
| Mg10 | 0.767238  | 3.093548  | -0.004246 |
| Mg11 | -3.478118 | 1.506225  | -1.297340 |
| Mg12 | 4.355976  | 0.466625  | -2.684783 |
| Mg13 | -1.219761 | -3.141919 | 1.108736  |
| Mg14 | -5.312311 | -0.641187 | -2.545513 |
| Mg15 | 2.539372  | 2.818903  | 2.365963  |
| Mg16 | 3.861411  | 2.395141  | -0.350099 |
| Mg17 | 1.812693  | -4.200744 | 0.245872  |
| Mg18 | 2.073047  | 0.030285  | -0.346625 |
| Mg19 | 1.668694  | 2.188117  | -2.711712 |
| Mg20 | -3.529320 | 1.359252  | 1.918770  |
| Mg21 | 1.324553  | 0.565798  | 3.788768  |
| Mg22 | 5.654276  | -0.357745 | -0.198053 |
| Mg23 | 1.293547  | -1.755983 | 1.983507  |
| Mg24 | -5.496802 | -2.788575 | -0.464271 |
| Mg25 | -2.301051 | 3.721100  | 0.432650  |
| Mg26 | 4.301975  | -2.726118 | 1.133325  |
| Mg27 | -5.950162 | 0.116298  | 0.293318  |
| Mg28 | 3.849643  | 0.103649  | 2.208411  |
| Mg29 | -0.896880 | 0.404690  | -2.793506 |

@mg29-isomer20 bp86/6-31G(d) Etot=-5802.774381 Eb=-16.30

|      |           |           |           |
|------|-----------|-----------|-----------|
| Mg1  | -1.048356 | 0.811042  | 0.097208  |
| Mg2  | -0.058761 | -2.008735 | 1.455960  |
| Mg3  | -1.218472 | 3.935421  | -1.268107 |
| Mg4  | -0.402984 | -1.538491 | -1.737766 |
| Mg5  | 2.584509  | -2.373466 | -2.069718 |
| Mg6  | 1.336086  | -0.055101 | -3.714748 |
| Mg7  | -2.605451 | -1.502521 | 2.912208  |
| Mg8  | -3.335804 | -0.426064 | -1.447736 |
| Mg9  | -0.383988 | 0.863508  | 3.003577  |
| Mg10 | 0.797132  | 3.077921  | 1.110501  |
| Mg11 | -3.882635 | 2.606880  | -1.039326 |
| Mg12 | 3.924029  | 0.537031  | -2.332118 |
| Mg13 | -2.575021 | -3.039687 | 0.107146  |
| Mg14 | -6.109552 | 0.487247  | -0.624333 |
| Mg15 | 2.615257  | 1.783194  | 3.036754  |
| Mg16 | 3.721808  | 2.426913  | 0.228955  |
| Mg17 | 0.556192  | -4.233450 | -0.545499 |
| Mg18 | 1.871200  | -0.041886 | 0.084734  |
| Mg19 | 1.356388  | 2.316058  | -1.839058 |
| Mg20 | -3.799574 | 0.957037  | 1.665183  |
| Mg21 | 1.973638  | -1.079669 | 3.333840  |
| Mg22 | 6.255471  | 0.902274  | -0.486715 |
| Mg23 | 2.920511  | -2.920706 | 0.898214  |
| Mg24 | -5.536848 | -2.429597 | -1.584065 |
| Mg25 | -2.251267 | 3.516259  | 1.435885  |
| Mg26 | 5.223460  | -1.869741 | -0.742372 |
| Mg27 | -5.123766 | -1.710616 | 1.243671  |
| Mg28 | 4.477730  | -0.377248 | 1.748606  |
| Mg29 | -1.280934 | 1.386191  | -2.930880 |

@mg29-isomer21 bp86/6-31G(d) Etot=-5802.770890 Eb=-16.22

|     |          |           |          |
|-----|----------|-----------|----------|
| Mg1 | 0.918082 | -2.935120 | 1.445651 |
|-----|----------|-----------|----------|

|      |           |           |           |
|------|-----------|-----------|-----------|
| Mg2  | 2.931307  | 0.384480  | -0.552755 |
| Mg3  | -2.043260 | -2.584900 | 1.334805  |
| Mg4  | 3.731230  | -2.198295 | 0.858877  |
| Mg5  | -0.004760 | -0.341567 | -0.012361 |
| Mg6  | 4.906565  | -1.334590 | -2.132352 |
| Mg7  | -3.486968 | -0.366188 | 2.970331  |
| Mg8  | 5.183073  | 0.122138  | 2.281115  |
| Mg9  | 6.682517  | -1.422832 | 0.252876  |
| Mg10 | -4.922178 | -2.125366 | 0.574270  |
| Mg11 | -3.286199 | -2.119444 | -2.155102 |
| Mg12 | 1.139284  | 2.860131  | 0.307725  |
| Mg13 | -1.609930 | 2.902279  | -0.530363 |
| Mg14 | -2.835093 | 0.097269  | 0.009794  |
| Mg15 | -0.530849 | -1.061637 | 3.473783  |
| Mg16 | -5.891200 | 0.596722  | 1.194370  |
| Mg17 | -2.625963 | 0.999533  | -2.891393 |
| Mg18 | -0.745323 | -3.307138 | -1.214387 |
| Mg19 | -0.618957 | -1.135959 | -3.314022 |
| Mg20 | 2.055069  | 0.246183  | 2.395340  |
| Mg21 | -5.613105 | -0.268521 | -1.735057 |
| Mg22 | 5.924639  | 1.265483  | -0.792048 |
| Mg23 | 4.041094  | 2.632620  | 1.227715  |
| Mg24 | -4.669772 | 2.408607  | -0.985378 |
| Mg25 | 3.417983  | 2.971745  | -1.895793 |
| Mg26 | -3.601636 | 2.535912  | 1.853659  |
| Mg27 | 1.933141  | -2.068841 | -1.815405 |
| Mg28 | 0.420244  | 1.618616  | -2.433868 |
| Mg29 | -0.799034 | 1.628681  | 2.279973  |

@mg29-isomer22 bp86/6-31G(d) Etot=-5802.769734 Eb=-16.20

|      |           |           |           |
|------|-----------|-----------|-----------|
| Mg1  | 0.067289  | -0.201842 | -0.290535 |
| Mg2  | -2.028703 | 1.714982  | -1.421558 |
| Mg3  | 2.216680  | -1.208490 | -2.608379 |
| Mg4  | 2.861463  | -0.063849 | 0.143598  |
| Mg5  | -1.032263 | 3.487246  | 1.012450  |
| Mg6  | 3.380987  | -2.120993 | 2.363597  |
| Mg7  | -0.917710 | -3.510850 | -0.581541 |
| Mg8  | 1.890944  | -3.001840 | -0.134015 |
| Mg9  | -1.530065 | -1.331339 | -2.660360 |
| Mg10 | 4.211171  | 2.455896  | -0.197518 |
| Mg11 | -4.957065 | 2.707752  | -1.361379 |
| Mg12 | 0.022789  | -2.166161 | 2.096251  |
| Mg13 | 5.279801  | 0.061334  | -2.138000 |
| Mg14 | -3.620538 | 2.075814  | 1.296211  |
| Mg15 | -2.683853 | -0.961110 | 0.503176  |
| Mg16 | -6.325318 | 0.797782  | 0.557967  |
| Mg17 | 4.242990  | 0.928332  | 2.709929  |
| Mg18 | 4.859043  | -2.350330 | -0.463772 |
| Mg19 | -4.552173 | -0.222281 | -1.876689 |
| Mg20 | -3.762527 | -3.120217 | -1.572614 |
| Mg21 | 1.549565  | 2.239807  | 1.840149  |
| Mg22 | 0.272908  | 0.945031  | -3.394736 |
| Mg23 | 3.106865  | 1.802788  | -3.010967 |
| Mg24 | -1.161546 | 0.751882  | 2.605026  |
| Mg25 | 1.018750  | 2.704509  | -1.097021 |
| Mg26 | 1.535620  | -0.116049 | 3.655097  |
| Mg27 | -5.664895 | -2.052477 | 0.540504  |
| Mg28 | -4.521005 | -0.365266 | 2.817958  |
| Mg29 | 6.240797  | 0.119940  | 0.667173  |

@mg29-isomer23 bp86/6-31G(d) Etot=-5802.769678 Eb=-16.20

|     |          |           |           |
|-----|----------|-----------|-----------|
| Mg1 | 1.290594 | -0.909817 | -0.176800 |
| Mg2 | 1.204808 | -2.118767 | 2.587875  |
| Mg3 | 3.314470 | 3.674985  | -0.516757 |

|      |           |           |           |
|------|-----------|-----------|-----------|
| Mg4  | -3.693905 | -2.121224 | -2.252646 |
| Mg5  | -0.784998 | -1.156352 | -2.632209 |
| Mg6  | 4.018781  | -2.335524 | -1.638004 |
| Mg7  | 2.097623  | -0.281595 | -3.177841 |
| Mg8  | 1.059313  | 1.841609  | 3.973841  |
| Mg9  | -3.677915 | 0.178696  | 2.366551  |
| Mg10 | 0.496391  | 3.554510  | 1.287617  |
| Mg11 | 3.017978  | 2.638847  | -3.305362 |
| Mg12 | -2.272169 | 3.069413  | 2.266777  |
| Mg13 | -1.846171 | -2.156049 | 2.765489  |
| Mg14 | -2.207749 | -0.499744 | -0.173709 |
| Mg15 | -0.486579 | 0.598946  | 1.828258  |
| Mg16 | 0.954029  | 1.818244  | -1.173974 |
| Mg17 | 2.506342  | -3.939883 | 0.404478  |
| Mg18 | -3.644609 | 1.022603  | -2.485464 |
| Mg19 | 3.323158  | -0.308489 | 3.972540  |
| Mg20 | 1.285506  | -3.319249 | -2.297743 |
| Mg21 | -0.728368 | -3.271485 | 0.176068  |
| Mg22 | -0.902348 | 1.872052  | -3.475698 |
| Mg23 | 4.130419  | 0.663165  | -1.114149 |
| Mg24 | -3.787662 | -3.037689 | 0.713553  |
| Mg25 | -1.834882 | 2.995240  | -0.736462 |
| Mg26 | -4.443629 | 2.195570  | 0.253942  |
| Mg27 | 2.856237  | 1.427003  | 1.522450  |
| Mg28 | -5.304927 | -0.623881 | -0.276617 |
| Mg29 | 4.060263  | -1.471137 | 1.313997  |

@mg29-isomer24 bp86/6-31G(d) Etot=-5802.766757 Eb=-16.13

|      |           |           |           |
|------|-----------|-----------|-----------|
| Mg1  | -0.732420 | 1.185164  | -0.189641 |
| Mg2  | -3.920019 | 1.910698  | 0.013284  |
| Mg3  | 1.933801  | -0.128187 | 0.199220  |
| Mg4  | 0.737220  | 3.774983  | -1.113970 |
| Mg5  | 0.457477  | 1.313991  | -3.017298 |
| Mg6  | -0.188985 | -1.678634 | -1.174398 |
| Mg7  | 1.180537  | 2.244321  | 2.109220  |
| Mg8  | -1.586005 | -0.674279 | -3.814004 |
| Mg9  | -1.907755 | 2.716447  | 2.147022  |
| Mg10 | -3.591858 | -0.694111 | -1.610900 |
| Mg11 | -2.390245 | 2.153264  | -2.606087 |
| Mg12 | -2.336868 | -3.352300 | -2.538322 |
| Mg13 | 2.038706  | -1.013635 | 3.148076  |
| Mg14 | -0.664274 | 0.267032  | 3.536859  |
| Mg15 | -5.279622 | -1.001071 | 0.965173  |
| Mg16 | -4.200709 | 0.995388  | 3.102704  |
| Mg17 | 2.657605  | -0.668289 | -2.830232 |
| Mg18 | 2.158779  | -3.449736 | 0.785633  |
| Mg19 | -0.333387 | -2.474704 | 1.977876  |
| Mg20 | -3.164546 | -3.291399 | 0.323596  |
| Mg21 | -2.150803 | 4.520276  | -0.530049 |
| Mg22 | 4.109466  | 1.088842  | 2.372809  |
| Mg23 | 4.568526  | -1.761025 | 1.636864  |
| Mg24 | -2.413091 | -0.613523 | 1.308903  |
| Mg25 | 3.436638  | 3.255379  | 0.352337  |
| Mg26 | 3.149832  | 2.335460  | -2.416661 |
| Mg27 | -0.518523 | -4.756295 | -0.253056 |
| Mg28 | 4.158427  | -2.642606 | -1.230340 |
| Mg29 | 4.792094  | 0.438551  | -0.654616 |

@mg29-isomer25 bp86/6-31G(d) Etot=-5802.765626 Eb=-16.11

|     |           |           |           |
|-----|-----------|-----------|-----------|
| Mg1 | -0.853645 | -0.652867 | 0.079177  |
| Mg2 | -3.276899 | 0.139576  | -1.614383 |
| Mg3 | -0.885811 | 2.241525  | -1.626797 |
| Mg4 | 1.094573  | -1.928597 | 2.615698  |
| Mg5 | 2.496174  | -2.618249 | -2.021948 |

|      |           |           |           |
|------|-----------|-----------|-----------|
| Mg6  | -1.005268 | -2.696753 | -2.234067 |
| Mg7  | 2.189732  | -0.230707 | 0.106644  |
| Mg8  | 3.685967  | 0.045348  | -2.934394 |
| Mg9  | 0.610222  | -0.199752 | -2.695770 |
| Mg10 | 2.178982  | 2.363064  | -1.574474 |
| Mg11 | -2.736086 | 1.997410  | 1.065157  |
| Mg12 | -1.081013 | 0.158884  | 3.063874  |
| Mg13 | 1.958664  | 0.861528  | 3.350679  |
| Mg14 | 0.733537  | -3.529289 | 0.161078  |
| Mg15 | 5.150951  | 1.551302  | -0.792864 |
| Mg16 | 4.760805  | -0.068957 | 1.773850  |
| Mg17 | -1.696766 | 4.855117  | 0.048442  |
| Mg18 | 0.287865  | 2.170613  | 1.165392  |
| Mg19 | -3.859137 | -0.708181 | 1.623048  |
| Mg20 | -3.752115 | 3.229581  | -1.540137 |
| Mg21 | 1.282342  | 4.790696  | 0.053335  |
| Mg22 | -1.807101 | -2.944942 | 1.881194  |
| Mg23 | 5.330690  | -1.469156 | -0.886504 |
| Mg24 | -6.314422 | -1.115949 | -0.288044 |
| Mg25 | -1.855184 | -5.061708 | -0.385502 |
| Mg26 | -3.708882 | -2.747257 | -0.639310 |
| Mg27 | 3.568182  | -2.883717 | 0.959753  |
| Mg28 | 3.324366  | 2.727848  | 1.264783  |
| Mg29 | -5.820727 | 1.723588  | 0.022090  |

@mg29-isomer26 bp86/6-31G(d) Etot=-5802.764349 Eb=-16.08

|      |           |           |           |
|------|-----------|-----------|-----------|
| Mg1  | 0.875879  | -0.048695 | -0.147608 |
| Mg2  | 2.300733  | -2.003523 | -2.314210 |
| Mg3  | -3.099489 | -0.876286 | -2.616723 |
| Mg4  | 3.437196  | 0.771869  | -1.189271 |
| Mg5  | 5.948336  | -0.128357 | 0.437288  |
| Mg6  | -0.512261 | 2.810481  | 0.620967  |
| Mg7  | -2.025716 | 0.007000  | 0.173784  |
| Mg8  | -1.936652 | 1.969257  | -2.207118 |
| Mg9  | -2.547849 | -1.856276 | 3.057762  |
| Mg10 | 1.387436  | 1.493999  | 2.635485  |
| Mg11 | 1.707338  | -3.315839 | 0.420130  |
| Mg12 | -4.513403 | 0.087691  | 2.024533  |
| Mg13 | 0.338654  | -1.379537 | 2.612698  |
| Mg14 | -1.584428 | 1.049445  | 3.039369  |
| Mg15 | 0.000238  | -0.156386 | -3.301708 |
| Mg16 | -6.439250 | 1.575791  | 0.305922  |
| Mg17 | -3.596256 | 2.629702  | 0.430116  |
| Mg18 | 5.408428  | -1.052753 | -2.417856 |
| Mg19 | 0.943004  | 2.454957  | -2.030942 |
| Mg20 | 4.551217  | -2.809944 | -0.246999 |
| Mg21 | 4.417732  | 1.852008  | 2.250361  |
| Mg22 | -3.549255 | -2.462901 | 0.091359  |
| Mg23 | -0.674270 | -2.506538 | -1.498932 |
| Mg24 | 2.475109  | 3.357365  | 0.470291  |
| Mg25 | -1.125628 | -3.856401 | 1.225357  |
| Mg26 | -4.914247 | 1.563086  | -2.227406 |
| Mg27 | -5.936352 | -1.090404 | -1.025548 |
| Mg28 | 3.240747  | -0.914708 | 1.764797  |
| Mg29 | 5.423010  | 2.835897  | -0.335897 |

@mg29-isomer27 bp86/6-31G(d) Etot=-5802.759251 Eb=-15.97

|     |           |           |           |
|-----|-----------|-----------|-----------|
| Mg1 | -1.976826 | 0.126307  | 0.105238  |
| Mg2 | 1.109062  | -2.325650 | 1.907159  |
| Mg3 | -0.098507 | 0.904584  | -2.576863 |
| Mg4 | 0.943937  | 0.252313  | 0.250584  |
| Mg5 | -4.247884 | -1.578207 | 2.032562  |
| Mg6 | -1.772621 | -2.994815 | 1.240135  |
| Mg7 | -3.069390 | 3.049983  | 0.075365  |

|      |           |           |           |
|------|-----------|-----------|-----------|
| Mg8  | -3.053855 | 0.168638  | -2.711800 |
| Mg9  | -0.264762 | -2.030866 | -1.450313 |
| Mg10 | 2.487822  | -0.598868 | -2.334530 |
| Mg11 | -3.698290 | -2.255499 | -0.972870 |
| Mg12 | -2.038414 | 3.203552  | -2.781917 |
| Mg13 | -5.035065 | 0.433764  | -0.224382 |
| Mg14 | -4.943065 | 2.675840  | -2.271500 |
| Mg15 | 5.331196  | -1.612922 | -1.408673 |
| Mg16 | 0.517857  | -4.802218 | 0.152806  |
| Mg17 | 2.730166  | -3.037694 | -0.638601 |
| Mg18 | 1.537983  | 0.635352  | 3.196112  |
| Mg19 | -1.402912 | -0.623381 | 3.189590  |
| Mg20 | 3.664891  | -0.802183 | 1.206911  |
| Mg21 | -2.206761 | -4.904159 | -1.184711 |
| Mg22 | 1.752836  | 3.530741  | 1.976764  |
| Mg23 | 0.015959  | 3.127156  | -0.516456 |
| Mg24 | 3.108028  | 2.092253  | -0.640102 |
| Mg25 | 4.225981  | 1.948901  | 2.338911  |
| Mg26 | 5.089466  | 1.030638  | -2.754041 |
| Mg27 | 6.045103  | 0.887804  | 0.021611  |
| Mg28 | -3.815487 | 1.241037  | 2.472317  |
| Mg29 | -0.936447 | 2.257599  | 2.300695  |

@mg29-isomer28 bp86/6-31G(d) Etot=-5802.758669 Eb=-15.96

|      |           |           |           |
|------|-----------|-----------|-----------|
| Mg1  | 1.056871  | -2.537242 | 1.749098  |
| Mg2  | 6.102444  | -2.318180 | 0.541918  |
| Mg3  | -5.011825 | 0.155371  | 1.278318  |
| Mg4  | 2.646050  | 2.208173  | 1.584615  |
| Mg5  | 3.471342  | -0.677419 | 1.143899  |
| Mg6  | 4.805386  | -1.212936 | -1.760741 |
| Mg7  | -2.793561 | 1.259045  | -3.062131 |
| Mg8  | -1.348515 | -1.371136 | -2.494866 |
| Mg9  | -4.532866 | -0.904392 | -1.674462 |
| Mg10 | -1.910131 | -2.031056 | 0.946247  |
| Mg11 | 3.182778  | -3.393217 | -0.314488 |
| Mg12 | -2.236233 | 0.681998  | -0.182390 |
| Mg13 | -3.005248 | -3.698779 | -1.384804 |
| Mg14 | 0.224972  | 1.419965  | -2.505251 |
| Mg15 | 6.017242  | 0.861603  | 0.118127  |
| Mg16 | 4.827530  | 3.552132  | -0.011423 |
| Mg17 | -5.086129 | -2.741551 | 0.597320  |
| Mg18 | 0.723741  | 0.405104  | 3.196285  |
| Mg19 | -4.978351 | 2.204028  | -1.027601 |
| Mg20 | 1.456243  | 3.720089  | -0.679161 |
| Mg21 | 0.608053  | -0.016567 | 0.155441  |
| Mg22 | -0.463449 | 2.710374  | 1.553021  |
| Mg23 | 3.122958  | 1.268863  | -1.363157 |
| Mg24 | 1.760645  | -1.373803 | -2.403159 |
| Mg25 | -2.351412 | 0.636505  | 2.848942  |
| Mg26 | -1.103668 | -1.878346 | 3.874202  |
| Mg27 | 0.109881  | -3.491718 | -0.981430 |
| Mg28 | -1.705204 | 3.500762  | -1.111612 |
| Mg29 | -3.589545 | 3.062331  | 1.369243  |

@mg29-isomer29 bp86/6-31G(d) Etot=-5802.753038 Eb=-15.84

|     |           |           |           |
|-----|-----------|-----------|-----------|
| Mg1 | -0.742522 | -1.848221 | -1.432262 |
| Mg2 | 0.650235  | -1.317860 | 1.409825  |
| Mg3 | 2.275137  | -2.029188 | -1.340248 |
| Mg4 | -4.632270 | -0.686627 | 1.488734  |
| Mg5 | -1.599570 | 0.698477  | 0.150355  |
| Mg6 | -4.462081 | 1.341707  | -0.955109 |
| Mg7 | -3.958800 | 2.103224  | 1.926596  |
| Mg8 | -1.363964 | 3.216743  | 2.793477  |
| Mg9 | 1.385746  | 0.931273  | -0.496472 |

|      |           |           |           |
|------|-----------|-----------|-----------|
| Mg10 | -3.706826 | -1.585921 | -1.301172 |
| Mg11 | -2.471024 | 3.790132  | -0.107392 |
| Mg12 | 5.177925  | -2.437987 | -0.559466 |
| Mg13 | 7.267472  | -0.362770 | -0.377969 |
| Mg14 | -2.158640 | -2.389455 | 1.366525  |
| Mg15 | 3.741360  | -0.355332 | 1.353232  |
| Mg16 | -2.264144 | 0.344039  | -3.114777 |
| Mg17 | 0.368625  | -4.272477 | 0.223101  |
| Mg18 | 6.242389  | 2.285239  | 0.341126  |
| Mg19 | 0.769634  | 0.043089  | -3.313716 |
| Mg20 | 4.399468  | 0.500597  | -1.539390 |
| Mg21 | 3.054275  | -3.436583 | 1.335829  |
| Mg22 | 1.013881  | 1.434004  | 2.577064  |
| Mg23 | -4.944235 | -3.615917 | 0.565186  |
| Mg24 | -0.427108 | 2.703117  | -2.262299 |
| Mg25 | 0.524085  | 3.709277  | 0.534067  |
| Mg26 | 3.394413  | 2.763389  | 1.120406  |
| Mg27 | -2.467636 | -4.933845 | -0.465930 |
| Mg28 | -3.286189 | 3.249769  | -3.064126 |
| Mg29 | -1.779635 | 0.158109  | 3.144806  |

@mg29-isomer30 bp86/6-31G(d) Etot=-5802.748146 Eb=-15.73

|      |           |           |           |
|------|-----------|-----------|-----------|
| Mg1  | 1.104832  | -1.477040 | -2.223880 |
| Mg2  | 2.355806  | 0.079643  | 0.148588  |
| Mg3  | 0.376083  | -2.413200 | 1.020504  |
| Mg4  | -3.554701 | 0.007464  | -1.609439 |
| Mg5  | 5.267546  | -1.553445 | 0.985744  |
| Mg6  | 1.813862  | 2.539062  | 1.832579  |
| Mg7  | 4.595989  | 0.736311  | 2.788919  |
| Mg8  | -0.913751 | 0.896574  | -3.086757 |
| Mg9  | 2.138856  | 0.995008  | 4.420217  |
| Mg10 | -6.661903 | -0.450175 | -1.195229 |
| Mg11 | -7.651815 | 1.179309  | 1.169284  |
| Mg12 | -5.333286 | -0.582821 | 1.725924  |
| Mg13 | 3.059640  | -3.109012 | -0.065757 |
| Mg14 | 2.063358  | 1.228529  | -3.032462 |
| Mg15 | 5.531720  | 1.185654  | -0.018629 |
| Mg16 | -3.023003 | 1.461037  | 1.702643  |
| Mg17 | -1.754991 | -2.429455 | -1.402909 |
| Mg18 | -4.666620 | -2.605993 | -0.493094 |
| Mg19 | 0.482849  | 2.938635  | -0.963580 |
| Mg20 | -2.479431 | 2.776202  | -1.130095 |
| Mg21 | 4.215425  | -1.188771 | -2.041721 |
| Mg22 | 5.034995  | 1.566340  | -2.970870 |
| Mg23 | 3.384575  | 3.082008  | -0.899958 |
| Mg24 | 0.710043  | -4.348338 | -1.390598 |
| Mg25 | -0.144178 | 0.182559  | 2.815822  |
| Mg26 | 2.606805  | -1.622043 | 2.813670  |
| Mg27 | -0.681419 | 0.250015  | -0.125362 |
| Mg28 | -5.296505 | 2.207606  | -0.346295 |
| Mg29 | -2.580778 | -1.531665 | 1.572741  |

@mg29-isomer31 bp86/6-31G(d) Etot=-5802.745616 Eb=-15.67

|      |           |           |           |
|------|-----------|-----------|-----------|
| Mg1  | -0.665960 | -2.034615 | -0.936970 |
| Mg2  | 0.351635  | 1.943308  | 2.187627  |
| Mg3  | 2.634324  | -1.705166 | -0.835102 |
| Mg4  | -1.631656 | 2.290495  | -2.787801 |
| Mg5  | 0.691169  | -0.988265 | 1.653436  |
| Mg6  | -2.071815 | 0.509718  | 0.066472  |
| Mg7  | 5.592324  | -2.456802 | -0.316918 |
| Mg8  | -1.987530 | -2.208436 | 1.883560  |
| Mg9  | 0.725793  | 0.793733  | -1.098538 |
| Mg10 | -0.528065 | 3.445427  | -0.160802 |
| Mg11 | -4.769219 | -0.833735 | -0.838888 |



|      |           |           |           |
|------|-----------|-----------|-----------|
| Mg12 | 4.805158  | -1.394270 | -3.014203 |
| Mg13 | -4.638959 | 1.606973  | -2.631659 |
| Mg14 | 3.275323  | 0.619955  | 1.281815  |
| Mg15 | -4.596509 | -3.317183 | 0.813465  |
| Mg16 | -2.482937 | -0.551972 | -3.001824 |
| Mg17 | 3.812281  | -2.201150 | 2.036019  |
| Mg18 | -2.939879 | 2.508919  | 2.283945  |
| Mg19 | -3.391983 | -3.265060 | -2.005951 |
| Mg20 | -1.568690 | 0.191635  | 3.675033  |
| Mg21 | -4.347792 | -0.442931 | 2.219341  |
| Mg22 | -5.502851 | 1.740662  | 0.444671  |
| Mg23 | -1.918295 | -4.617250 | 0.123530  |
| Mg24 | 2.433405  | 3.388085  | 0.205390  |
| Mg25 | 3.754668  | 1.110205  | -1.698293 |
| Mg26 | 6.184364  | -0.261289 | 1.772698  |
| Mg27 | 5.576307  | 2.428910  | 0.474421  |
| Mg28 | 6.677970  | 0.231393  | -1.169718 |
| Mg29 | -3.472581 | 3.468705  | -0.624759 |

@mg29-isomer32 bp86/6-31G(d) Etot=-5802.739179 Eb=-15.54

|      |           |           |           |
|------|-----------|-----------|-----------|
| Mg1  | 0.222557  | -0.886935 | 1.281689  |
| Mg2  | 2.026949  | 1.482945  | 1.512998  |
| Mg3  | 5.229345  | 1.398874  | 1.584132  |
| Mg4  | 0.395655  | 0.795681  | -1.311449 |
| Mg5  | 2.316080  | -1.432177 | -2.164869 |
| Mg6  | 4.764307  | -2.283014 | -0.639457 |
| Mg7  | -1.582579 | -3.255301 | 1.052024  |
| Mg8  | -0.540868 | -2.210927 | -1.613678 |
| Mg9  | 3.635048  | 1.088998  | -1.105083 |
| Mg10 | -2.535926 | -0.182724 | 0.021449  |
| Mg11 | -2.033628 | -0.993218 | 3.252375  |
| Mg12 | -1.892150 | 2.757790  | -1.373943 |
| Mg13 | 3.332172  | -1.243665 | 1.725297  |
| Mg14 | -4.317984 | -2.472563 | 2.014517  |
| Mg15 | -4.015497 | 2.284102  | -3.396414 |
| Mg16 | 1.662924  | -3.349079 | 0.150344  |
| Mg17 | 6.749357  | 0.240705  | -0.791993 |
| Mg18 | -1.184997 | 1.949273  | 1.618113  |
| Mg19 | -2.075009 | -0.064771 | -3.065505 |
| Mg20 | 5.136306  | -0.547834 | -3.159747 |
| Mg21 | -3.610876 | -2.568476 | -1.380020 |
| Mg22 | -4.688659 | 1.959807  | -0.405335 |
| Mg23 | -2.457026 | 1.818232  | 4.358056  |
| Mg24 | 6.415358  | -1.322980 | 1.800442  |
| Mg25 | -4.455645 | 0.665463  | 2.360662  |
| Mg26 | 0.729774  | 3.693701  | -0.186917 |
| Mg27 | -5.138139 | -0.343514 | -2.725288 |
| Mg28 | -5.871869 | -0.796802 | 0.132995  |
| Mg29 | 3.785020  | 3.818409  | 0.454604  |

@mg29-isomer33 bp86/6-31G(d) Etot=-5802.735053 Eb=-15.45

|      |           |           |           |
|------|-----------|-----------|-----------|
| Mg1  | -0.440219 | 0.883492  | 1.316375  |
| Mg2  | -0.838628 | 1.600523  | -1.724934 |
| Mg3  | -2.828302 | 2.975828  | 0.320498  |
| Mg4  | 2.046292  | -0.624478 | 0.363789  |
| Mg5  | 2.295052  | -2.826284 | -1.905729 |
| Mg6  | 2.739729  | -3.222732 | 1.874084  |
| Mg7  | 4.905941  | -2.497803 | -0.086012 |
| Mg8  | -2.817023 | -0.881872 | 2.778599  |
| Mg9  | 2.159530  | 2.204430  | -1.333887 |
| Mg10 | -0.092064 | -2.119171 | 2.111157  |
| Mg11 | 0.384783  | -4.350801 | 0.085358  |
| Mg12 | -0.506863 | -1.560095 | -1.143502 |
| Mg13 | -2.921726 | -0.053617 | -0.084538 |

|      |           |           |           |
|------|-----------|-----------|-----------|
| Mg14 | -5.276824 | -1.974584 | 1.010006  |
| Mg15 | -5.042140 | 1.050197  | 1.900083  |
| Mg16 | 5.141239  | 2.812692  | -0.943746 |
| Mg17 | 0.074859  | 3.888863  | 0.252356  |
| Mg18 | 2.291266  | 2.076588  | 1.745152  |
| Mg19 | 5.032377  | 3.434998  | 1.942527  |
| Mg20 | -2.451230 | -3.160008 | 0.512098  |
| Mg21 | 1.449902  | -0.156784 | -2.929375 |
| Mg22 | -5.883809 | 2.933246  | -0.278437 |
| Mg23 | 4.822924  | 0.374642  | 1.049773  |
| Mg24 | 3.042751  | 4.814965  | 0.194061  |
| Mg25 | -4.099803 | 1.498027  | -2.255853 |
| Mg26 | -6.486220 | 0.077289  | -0.713031 |
| Mg27 | 4.284233  | -0.083605 | -1.873500 |
| Mg28 | -4.347711 | -1.888660 | -1.903121 |
| Mg29 | 3.361686  | -5.225285 | -0.280252 |

@mg29-isomer34 bp86/6-31G(d) Etot=-5802.730264 Eb=-15.34

|      |           |           |           |
|------|-----------|-----------|-----------|
| Mg1  | 0.177865  | -0.057409 | -0.513279 |
| Mg2  | 1.386474  | -2.211277 | 1.559577  |
| Mg3  | -0.218849 | 0.050472  | -3.444154 |
| Mg4  | 0.724341  | 2.951404  | 0.865488  |
| Mg5  | -1.992898 | 1.586517  | 0.709143  |
| Mg6  | -1.140573 | 4.734212  | -1.032543 |
| Mg7  | 4.888462  | -1.270524 | 1.796729  |
| Mg8  | 2.655211  | 0.628003  | 0.780145  |
| Mg9  | 1.486242  | -4.368559 | -0.761789 |
| Mg10 | -0.910803 | -2.616380 | -1.557182 |
| Mg11 | 2.808233  | 0.413134  | -2.572027 |
| Mg12 | -3.908691 | 3.685491  | -0.408002 |
| Mg13 | 2.908898  | 0.053026  | 3.675878  |
| Mg14 | 5.359725  | 0.414697  | -0.849463 |
| Mg15 | -3.600844 | -3.302572 | -0.144353 |
| Mg16 | -3.066788 | -0.402680 | -1.355964 |
| Mg17 | 0.168112  | 0.527027  | 2.718330  |
| Mg18 | -1.569745 | -1.676533 | 1.429651  |
| Mg19 | -2.206647 | 2.291245  | -2.545822 |
| Mg20 | 3.461875  | -2.050215 | -0.745533 |
| Mg21 | -1.084179 | -4.880422 | 0.629295  |
| Mg22 | -4.577252 | 2.337590  | 2.166712  |
| Mg23 | -2.704958 | 0.300832  | 3.593871  |
| Mg24 | 3.720590  | 3.052451  | -0.815606 |
| Mg25 | 1.623475  | -2.380959 | -3.143620 |
| Mg26 | -4.503279 | -0.633333 | 1.401030  |
| Mg27 | 5.362525  | 1.755876  | 1.758721  |
| Mg28 | -6.041360 | -1.602016 | -1.035735 |
| Mg29 | 0.794837  | 2.670903  | -2.159497 |

@mg29-isomer35 bp86/6-31G(d) Etot=-5802.703339 Eb=-14.76

|      |           |           |           |
|------|-----------|-----------|-----------|
| Mg1  | 0.132835  | -2.479285 | -0.157983 |
| Mg2  | -2.788066 | -3.386398 | -0.968264 |
| Mg3  | 2.586285  | -2.402857 | -2.050091 |
| Mg4  | -5.230613 | -1.414688 | -1.907505 |
| Mg5  | -4.965558 | -2.311395 | 0.984861  |
| Mg6  | -0.707134 | -2.594396 | -2.987798 |
| Mg7  | 0.983442  | -1.855547 | 2.591351  |
| Mg8  | -6.360476 | 0.303863  | 0.358983  |
| Mg9  | -0.803151 | 0.364554  | 1.194562  |
| Mg10 | -2.064262 | -2.493876 | 1.900710  |
| Mg11 | 2.953950  | -3.423112 | 0.813842  |
| Mg12 | 4.066573  | -1.138064 | 2.619079  |
| Mg13 | 6.833386  | -0.259109 | 1.862467  |
| Mg14 | 3.841894  | 0.487752  | -1.946931 |
| Mg15 | 2.183026  | -0.100188 | 0.484154  |

|      |           |           |           |
|------|-----------|-----------|-----------|
| Mg16 | 6.681569  | 0.829526  | -0.943562 |
| Mg17 | -4.759339 | 1.572968  | -2.164246 |
| Mg18 | 0.677887  | 0.018333  | -2.156685 |
| Mg19 | -6.289639 | 3.314709  | -0.203581 |
| Mg20 | 4.456931  | 1.687588  | 1.324590  |
| Mg21 | -1.018894 | 2.453781  | -1.316657 |
| Mg22 | -2.478875 | -0.312167 | -1.267886 |
| Mg23 | 5.086168  | -1.789808 | -0.380154 |
| Mg24 | 1.910131  | 2.723586  | -1.085986 |
| Mg25 | -3.431883 | 2.091237  | 0.504467  |
| Mg26 | -5.903553 | 2.254625  | 2.564965  |
| Mg27 | 3.259115  | 4.462707  | 1.046182  |
| Mg28 | -3.853744 | 0.001004  | 2.539120  |
| Mg29 | 5.001997  | 3.394657  | -1.252003 |

@mg30-isomer01 bp86/6-31G(d) Etot=-6002.925318 Eb=-17.45

|      |           |           |           |
|------|-----------|-----------|-----------|
| Mg1  | 0.394453  | 3.368586  | 1.999272  |
| Mg2  | 2.676450  | -4.285335 | -0.221516 |
| Mg3  | -3.476898 | -1.156641 | 2.585357  |
| Mg4  | 1.384401  | 2.588481  | -2.591176 |
| Mg5  | 1.508783  | 0.634701  | 3.082484  |
| Mg6  | -1.757000 | -2.519472 | -2.227637 |
| Mg7  | 3.584058  | -1.383281 | -0.716295 |
| Mg8  | 4.273108  | 0.109240  | 1.804268  |
| Mg9  | -4.586735 | 1.880658  | -1.140729 |
| Mg10 | 0.453837  | -4.429623 | 1.820687  |
| Mg11 | -1.809978 | 0.179830  | 0.002310  |
| Mg12 | 1.143524  | 1.092673  | 0.042256  |
| Mg13 | -1.715588 | 2.426936  | -2.287037 |
| Mg14 | -4.518295 | -1.154828 | -0.337342 |
| Mg15 | -2.258872 | -3.245262 | 0.737192  |
| Mg16 | 1.535141  | -2.695886 | -2.732363 |
| Mg17 | 2.871317  | 0.009465  | -3.233943 |
| Mg18 | -0.488610 | -1.635054 | 2.814905  |
| Mg19 | 2.519809  | -2.232080 | 2.231723  |
| Mg20 | -4.684020 | 1.316638  | 1.737721  |
| Mg21 | -1.530786 | 1.193933  | 2.919017  |
| Mg22 | 3.438862  | 2.894916  | 2.028169  |
| Mg23 | 0.486993  | -1.757734 | -0.098026 |
| Mg24 | -2.509576 | 3.228410  | 0.737372  |
| Mg25 | -0.169409 | -4.801213 | -1.114175 |
| Mg26 | -0.117664 | -0.065460 | -2.792132 |
| Mg27 | 2.740893  | 4.346745  | -0.376351 |
| Mg28 | -0.200022 | 4.496988  | -0.781133 |
| Mg29 | -3.308344 | -0.067659 | -2.954681 |
| Mg30 | 4.120169  | 1.661327  | -0.938196 |

@mg30-isomer02 bp86/6-31G(d) Etot=-6002.924048 Eb=-17.43

|      |           |           |           |
|------|-----------|-----------|-----------|
| Mg1  | 2.183154  | 4.408556  | 0.435256  |
| Mg2  | -0.633795 | -1.831354 | 2.498185  |
| Mg3  | -3.018046 | -2.734577 | 0.794375  |
| Mg4  | 2.168350  | 2.315924  | 2.786875  |
| Mg5  | -5.040059 | -0.428871 | 0.620269  |
| Mg6  | -2.659497 | 3.706486  | -0.902164 |
| Mg7  | 4.348890  | 2.343040  | 0.627092  |
| Mg8  | 1.135802  | 1.269747  | 0.180718  |
| Mg9  | -0.708415 | 1.125281  | 3.002311  |
| Mg10 | -3.539399 | 2.193189  | 1.582807  |
| Mg11 | 1.667339  | -0.513270 | 3.706796  |
| Mg12 | 1.149398  | 0.818333  | -2.977834 |
| Mg13 | -1.831206 | 1.441696  | -2.903614 |
| Mg14 | -0.626650 | 3.677492  | 1.406052  |
| Mg15 | -3.324144 | -0.491681 | 2.980938  |
| Mg16 | -1.706573 | 0.227782  | 0.084912  |

|      |           |           |           |
|------|-----------|-----------|-----------|
| Mg17 | 2.142299  | -3.119645 | 2.008372  |
| Mg18 | 1.599391  | -4.626195 | -0.879536 |
| Mg19 | 2.045276  | -2.239774 | -2.912663 |
| Mg20 | 3.609950  | -0.444381 | 1.513091  |
| Mg21 | 0.697171  | -1.528930 | -0.350822 |
| Mg22 | -1.267905 | -3.686583 | -1.654129 |
| Mg23 | -3.513839 | -1.323157 | -1.992095 |
| Mg24 | 3.165453  | 2.995690  | -2.051228 |
| Mg25 | 3.910572  | -2.761754 | -0.539656 |
| Mg26 | -0.808687 | -1.298130 | -3.350238 |
| Mg27 | -0.492326 | -4.593601 | 1.199915  |
| Mg28 | 0.184035  | 3.556634  | -1.845155 |
| Mg29 | 3.731259  | 0.070223  | -1.575522 |
| Mg30 | -4.567798 | 1.471830  | -1.493309 |

@mg30-isomer03 bp86/6-31G(d) Etot=-6002.921530 Eb=-17.37

|      |           |           |           |
|------|-----------|-----------|-----------|
| Mg1  | -1.590302 | 0.084460  | 0.039371  |
| Mg2  | 4.273859  | 2.404486  | -0.898284 |
| Mg3  | 1.191490  | 1.263828  | 0.141814  |
| Mg4  | 2.416954  | 4.305780  | 0.534021  |
| Mg5  | 0.226971  | -1.165395 | -3.485058 |
| Mg6  | 0.836953  | -1.598256 | -0.316320 |
| Mg7  | -0.291737 | -1.523583 | 2.667782  |
| Mg8  | -1.508006 | -3.038079 | -1.952420 |
| Mg9  | -0.345175 | 1.604462  | -2.613368 |
| Mg10 | 1.231244  | -4.058676 | 2.067741  |
| Mg11 | 3.536148  | -3.551866 | 0.278370  |
| Mg12 | -4.475641 | 0.806126  | 1.140262  |
| Mg13 | -3.355710 | -1.574450 | 2.543914  |
| Mg14 | -1.832448 | 1.037888  | 3.109561  |
| Mg15 | 0.156332  | 3.254624  | 2.269913  |
| Mg16 | 4.006302  | -0.547333 | -0.289441 |
| Mg17 | 2.564982  | 0.575774  | -2.760376 |
| Mg18 | 0.876261  | -4.660698 | -0.871485 |
| Mg19 | -2.752035 | 3.354654  | 1.336195  |
| Mg20 | -1.650454 | -3.745427 | 1.005320  |
| Mg21 | 1.958747  | 3.573702  | -2.334385 |
| Mg22 | -2.670092 | -0.381154 | -2.894996 |
| Mg23 | 2.762846  | -1.349418 | 2.382301  |
| Mg24 | 3.530417  | 1.703505  | 2.036047  |
| Mg25 | 1.144393  | 0.829567  | 3.649223  |
| Mg26 | -0.540342 | 4.080379  | -0.696366 |
| Mg27 | -3.137749 | 2.381543  | -1.497244 |
| Mg28 | -3.956155 | -1.942349 | -0.409227 |
| Mg29 | 2.789413  | -2.506936 | -2.461356 |
| Mg30 | -5.397465 | 0.382843  | -1.721509 |

@mg30-isomer04 bp86/6-31G(d) Etot=-6002.917483 Eb=-17.29

|      |           |           |           |
|------|-----------|-----------|-----------|
| Mg1  | -1.289679 | -1.216916 | -0.014203 |
| Mg2  | -3.638349 | -1.752509 | -2.165135 |
| Mg3  | -3.091966 | 1.359716  | 1.950508  |
| Mg4  | -1.602746 | -4.105988 | 1.503751  |
| Mg5  | 1.716507  | -0.377909 | 0.098276  |
| Mg6  | -1.640494 | 0.245725  | -3.142393 |
| Mg7  | -4.448560 | -1.072867 | 0.748859  |
| Mg8  | -1.493975 | -3.934347 | -1.674807 |
| Mg9  | -2.484966 | -1.469584 | 2.935727  |
| Mg10 | -3.679103 | 1.190910  | -1.208696 |
| Mg11 | -3.243966 | 3.828421  | 0.243837  |
| Mg12 | 0.551787  | -2.167983 | 2.541486  |
| Mg13 | -4.069775 | -3.927852 | -0.074209 |
| Mg14 | 1.070488  | -3.640033 | 0.001758  |
| Mg15 | -0.548688 | 1.621196  | -0.031116 |
| Mg16 | -0.229337 | 0.677764  | 2.835941  |

|      |           |           |           |
|------|-----------|-----------|-----------|
| Mg17 | -0.945138 | 5.584270  | -0.222359 |
| Mg18 | 3.648516  | -2.274851 | 1.475451  |
| Mg19 | -0.818763 | 3.756095  | 2.173019  |
| Mg20 | 1.023269  | 1.374377  | -2.696459 |
| Mg21 | 4.604079  | 0.688495  | 1.697294  |
| Mg22 | 3.418770  | -3.000671 | -1.616468 |
| Mg23 | 3.378427  | -0.410975 | -3.064958 |
| Mg24 | -1.513724 | 3.254497  | -2.311074 |
| Mg25 | 1.380391  | 3.972938  | -1.038033 |
| Mg26 | 0.588888  | -1.730755 | -2.521656 |
| Mg27 | 3.607722  | 1.876156  | -0.957577 |
| Mg28 | 2.529645  | -0.080033 | 3.505769  |
| Mg29 | 2.020807  | 2.519776  | 1.795560  |
| Mg30 | 5.199933  | -0.787063 | -0.768093 |

@mg30-isomer05 bp86/6-31G(d) Etot=-6002.915117 Eb=-17.24

|      |           |           |           |
|------|-----------|-----------|-----------|
| Mg1  | -1.641947 | 0.818542  | 0.120760  |
| Mg2  | -0.148552 | -1.707498 | -0.160698 |
| Mg3  | -0.322894 | 2.109933  | 2.642930  |
| Mg4  | 0.249457  | -3.820239 | -2.485135 |
| Mg5  | 1.195092  | -2.997501 | 2.265168  |
| Mg6  | 1.507394  | 0.809487  | 0.077755  |
| Mg7  | -3.288266 | 3.005636  | -1.320782 |
| Mg8  | 4.485434  | 1.022625  | 1.874081  |
| Mg9  | 4.208548  | -0.550407 | -0.914595 |
| Mg10 | -1.804898 | -3.744985 | 1.855887  |
| Mg11 | -2.972813 | 3.592101  | 1.627377  |
| Mg12 | 2.382433  | 3.276940  | 1.558538  |
| Mg13 | 0.069344  | -5.194899 | 0.069966  |
| Mg14 | -2.667754 | -3.300159 | -1.116299 |
| Mg15 | -0.459660 | 3.711824  | -0.023209 |
| Mg16 | -4.874393 | 1.385663  | 0.757132  |
| Mg17 | 2.089506  | 3.869385  | -1.514452 |
| Mg18 | -3.644515 | -1.374008 | 1.337033  |
| Mg19 | -0.940011 | -0.885704 | 2.775146  |
| Mg20 | -4.013179 | -0.418505 | -1.589095 |
| Mg21 | -0.005979 | 1.590404  | -2.493717 |
| Mg22 | 1.699979  | -1.112384 | -2.632216 |
| Mg23 | 4.620026  | 2.585858  | -0.578185 |
| Mg24 | 3.136998  | 1.444253  | -2.908584 |
| Mg25 | -1.362712 | -1.203943 | -2.969280 |
| Mg26 | -2.759950 | 1.277444  | -3.700239 |
| Mg27 | 2.618440  | -3.338411 | -0.613681 |
| Mg28 | -3.182120 | 1.035398  | 3.154006  |
| Mg29 | 1.910282  | 0.020784  | 3.092912  |
| Mg30 | 3.916711  | -1.907633 | 1.811476  |

@mg30-isomer06 bp86/6-31G(d) Etot=-6002.907495 Eb=-17.08

|      |           |           |           |
|------|-----------|-----------|-----------|
| Mg1  | -3.110838 | -2.762634 | -2.238108 |
| Mg2  | -3.536274 | -2.611955 | 0.895356  |
| Mg3  | 2.732455  | 1.392645  | 2.304439  |
| Mg4  | -0.930388 | 1.880854  | -2.674420 |
| Mg5  | -0.227453 | 0.126648  | 2.427903  |
| Mg6  | -0.759253 | -3.198608 | -0.522168 |
| Mg7  | 4.187967  | -3.475098 | 0.037335  |
| Mg8  | -3.869487 | 1.907087  | -1.507005 |
| Mg9  | 4.340792  | -1.110813 | -1.853488 |
| Mg10 | -2.085220 | 2.883510  | 0.607583  |
| Mg11 | 1.599514  | -4.366327 | 0.996713  |
| Mg12 | 4.543250  | -0.694998 | 1.155374  |
| Mg13 | 2.187536  | 3.691558  | -2.204065 |
| Mg14 | 1.483944  | -1.060984 | 0.005650  |
| Mg15 | 3.872914  | 1.632981  | -0.687270 |
| Mg16 | -2.941426 | -1.109038 | 3.400076  |

|      |           |           |           |
|------|-----------|-----------|-----------|
| Mg17 | 2.753722  | 4.059008  | 0.729685  |
| Mg18 | -5.029543 | -0.871660 | -1.196304 |
| Mg19 | -2.466693 | 1.890684  | 3.427404  |
| Mg20 | -0.727301 | -2.861489 | 2.432048  |
| Mg21 | 2.348617  | -1.831918 | 2.825770  |
| Mg22 | 2.021705  | 0.651339  | -2.922795 |
| Mg23 | -0.391779 | -1.222193 | -2.851621 |
| Mg24 | 0.048538  | 4.866481  | -0.415923 |
| Mg25 | 0.260764  | 3.187040  | 2.531660  |
| Mg26 | -4.252328 | 0.611982  | 1.329952  |
| Mg27 | 0.715106  | 1.756692  | -0.150358 |
| Mg28 | -3.143846 | -0.092146 | -3.518042 |
| Mg29 | 2.087220  | -3.038274 | -2.132741 |
| Mg30 | -1.712217 | -0.230373 | -0.232640 |

@mg30-isomer07 bp86/6-31G(d) Etot=-6002.905436 Eb=-17.04

|      |           |           |           |
|------|-----------|-----------|-----------|
| Mg1  | 3.853930  | 1.815090  | 0.385566  |
| Mg2  | 2.947945  | -3.235861 | -1.614673 |
| Mg3  | -0.897772 | 0.525386  | 3.909642  |
| Mg4  | 1.550425  | -0.199971 | 0.137721  |
| Mg5  | -1.669776 | -0.485699 | -0.183009 |
| Mg6  | -0.504072 | 4.303352  | -0.930505 |
| Mg7  | -4.921649 | -1.276438 | 1.094389  |
| Mg8  | -3.340107 | 1.162072  | 2.129338  |
| Mg9  | 4.378116  | -0.391122 | 2.497701  |
| Mg10 | -0.530954 | 1.975316  | 1.172857  |
| Mg11 | 0.704307  | -1.321819 | -2.855490 |
| Mg12 | -0.009082 | 1.489898  | -1.981289 |
| Mg13 | -2.414111 | -0.113069 | -3.197164 |
| Mg14 | 4.083674  | -1.632447 | -3.763765 |
| Mg15 | -4.239279 | 0.952861  | -0.887503 |
| Mg16 | -0.226615 | -1.858899 | 2.209880  |
| Mg17 | -4.438531 | -2.021749 | -1.762568 |
| Mg18 | -3.031354 | -1.606971 | 3.349140  |
| Mg19 | 4.611471  | -1.052381 | -0.493692 |
| Mg20 | -2.691089 | 2.892799  | -2.651888 |
| Mg21 | 2.051631  | 1.523264  | 2.922359  |
| Mg22 | -3.141062 | 3.519548  | 0.260041  |
| Mg23 | 1.919126  | 3.990264  | 1.184198  |
| Mg24 | 2.094319  | -1.252422 | 4.154243  |
| Mg25 | -1.887429 | -3.095335 | -2.588585 |
| Mg26 | 0.203585  | -3.085922 | -0.407297 |
| Mg27 | 3.057311  | 0.812030  | -2.454035 |
| Mg28 | 2.422871  | 3.617198  | -1.693887 |
| Mg29 | 2.787288  | -2.717040 | 1.468416  |
| Mg30 | -2.723118 | -3.231933 | 0.589860  |

@mg30-isomer08 bp86/6-31G(d) Etot=-6002.905422 Eb=-17.04

|      |           |           |           |
|------|-----------|-----------|-----------|
| Mg1  | -1.074931 | -1.085938 | -0.660147 |
| Mg2  | -1.193242 | -1.936521 | -3.646371 |
| Mg3  | 3.142216  | -2.395226 | 1.812046  |
| Mg4  | -3.156257 | -3.030461 | 0.860993  |
| Mg5  | -0.674513 | 4.716364  | -1.665678 |
| Mg6  | -1.435859 | 3.977095  | 1.342262  |
| Mg7  | 1.594869  | -0.211525 | 0.354223  |
| Mg8  | -3.898696 | 2.161742  | 1.736564  |
| Mg9  | -4.381944 | -0.820972 | 2.517132  |
| Mg10 | 0.576578  | 0.511867  | -3.146966 |
| Mg11 | 3.530184  | 2.473366  | 0.363334  |
| Mg12 | 0.884699  | -0.692848 | 3.423671  |
| Mg13 | 2.023855  | -4.478481 | -0.215550 |
| Mg14 | -0.986723 | -4.099505 | -1.259202 |
| Mg15 | -3.635009 | -2.612417 | -2.093551 |
| Mg16 | 5.071605  | -0.165786 | 0.482213  |

|      |           |           |           |
|------|-----------|-----------|-----------|
| Mg17 | -0.421470 | 1.839438  | -0.667634 |
| Mg18 | 4.188250  | -2.488509 | -1.141918 |
| Mg19 | 0.097034  | -2.920211 | 1.502922  |
| Mg20 | 1.975795  | 3.162031  | -2.206047 |
| Mg21 | 3.534978  | 0.660234  | 2.827495  |
| Mg22 | 1.015783  | 2.314781  | 2.281038  |
| Mg23 | -1.876568 | -2.047434 | 3.540916  |
| Mg24 | -3.279646 | 3.038799  | -1.099440 |
| Mg25 | 1.420861  | -2.214882 | -2.187520 |
| Mg26 | -1.408599 | 0.499655  | 1.908896  |
| Mg27 | 1.454768  | 4.825373  | 0.382427  |
| Mg28 | -2.445405 | 0.690701  | -2.871433 |
| Mg29 | -4.064537 | -0.074608 | -0.370148 |
| Mg30 | 3.421922  | 0.403878  | -2.104525 |

@mg30-isomer09 bp86/6-31G(d) Etot=-6002.905371 Eb=-17.04

|      |           |           |           |
|------|-----------|-----------|-----------|
| Mg1  | 0.346635  | 1.651019  | 0.242136  |
| Mg2  | 0.808954  | -1.231097 | -0.118874 |
| Mg3  | 3.328520  | 1.048537  | -0.471781 |
| Mg4  | 1.300777  | 1.561121  | -2.881253 |
| Mg5  | -1.527719 | 1.175298  | 2.917949  |
| Mg6  | -2.146949 | -0.126508 | 0.079284  |
| Mg7  | -2.846569 | 2.807090  | 0.705921  |
| Mg8  | 3.664348  | -1.396362 | 1.666085  |
| Mg9  | 1.160887  | -1.517843 | -3.131865 |
| Mg10 | 3.590787  | 1.505968  | 2.554959  |
| Mg11 | 3.383184  | -4.357636 | 0.713063  |
| Mg12 | 1.120066  | -0.208852 | 2.929396  |
| Mg13 | 3.872393  | 0.125915  | -3.303470 |
| Mg14 | -0.138431 | 4.705901  | 0.632341  |
| Mg15 | -1.291972 | 0.222748  | -2.776402 |
| Mg16 | 3.673518  | -2.179171 | -1.355820 |
| Mg17 | 1.892579  | 4.176954  | -1.630407 |
| Mg18 | -1.121760 | 3.294987  | -2.001406 |
| Mg19 | -3.882540 | -2.576530 | 0.496913  |
| Mg20 | -3.834421 | 1.804725  | -2.034084 |
| Mg21 | 0.895323  | 2.898322  | 2.934448  |
| Mg22 | -5.336861 | 0.227740  | 0.034812  |
| Mg23 | -1.505789 | -2.751517 | -1.930054 |
| Mg24 | 2.963823  | 4.048939  | 1.050623  |
| Mg25 | -4.130006 | -0.286934 | 2.592252  |
| Mg26 | 1.236413  | -3.234608 | 2.381451  |
| Mg27 | 1.200267  | -4.129341 | -1.308202 |
| Mg28 | -1.133229 | -4.239240 | 0.698655  |
| Mg29 | -1.452559 | -1.849070 | 2.585320  |
| Mg30 | -4.089665 | -1.170555 | -2.271990 |

@mg30-isomer10 bp86/6-31G(d) Etot=-6002.902279 Eb=-16.97

|      |           |           |           |
|------|-----------|-----------|-----------|
| Mg1  | -2.042853 | -3.967299 | 0.452073  |
| Mg2  | 0.735220  | -2.875091 | 1.520703  |
| Mg3  | -2.513711 | -3.258156 | -2.637443 |
| Mg4  | -3.737846 | -2.073357 | 2.220993  |
| Mg5  | -1.021616 | -1.259588 | 3.435685  |
| Mg6  | 0.154536  | -3.035794 | -1.467811 |
| Mg7  | -4.551704 | -2.719863 | -0.575651 |
| Mg8  | 3.048277  | -3.069006 | -0.667475 |
| Mg9  | -3.297222 | 0.787400  | 3.113254  |
| Mg10 | -3.872793 | -0.599509 | -2.588216 |
| Mg11 | -1.471882 | -0.818642 | 0.186830  |
| Mg12 | 1.870217  | -0.228293 | 3.165068  |
| Mg13 | -0.818082 | -0.327337 | -2.839446 |
| Mg14 | 1.936471  | -1.434923 | -3.292743 |
| Mg15 | -4.356390 | 0.346922  | 0.265615  |
| Mg16 | 5.669791  | -2.028762 | 0.256984  |

|      |           |           |           |
|------|-----------|-----------|-----------|
| Mg17 | -0.495220 | 1.514613  | 2.317446  |
| Mg18 | 1.561388  | -0.286528 | -0.076297 |
| Mg19 | -3.048697 | 2.211290  | -1.928472 |
| Mg20 | 4.242057  | 0.419953  | 1.338510  |
| Mg21 | 4.272915  | -0.332060 | -1.808606 |
| Mg22 | 3.659079  | -2.520516 | 2.356601  |
| Mg23 | -0.316332 | 1.912828  | -0.687392 |
| Mg24 | -2.868905 | 3.060224  | 1.117160  |
| Mg25 | 3.728079  | 2.433245  | -0.948078 |
| Mg26 | 1.693974  | 1.629025  | -2.990353 |
| Mg27 | 2.158826  | 2.683023  | 1.582616  |
| Mg28 | -1.620644 | 4.808673  | -1.119143 |
| Mg29 | -0.138014 | 4.690927  | 1.442487  |
| Mg30 | 1.441080  | 4.336599  | -1.144899 |

@mg30-isomer11 bp86/6-31G(d) Etot=-6002.898747 Eb=-16.90

|      |           |           |           |
|------|-----------|-----------|-----------|
| Mg1  | -4.286038 | 1.825532  | 0.124774  |
| Mg2  | -3.419590 | -0.294321 | 2.292632  |
| Mg3  | 0.416889  | -1.620977 | -1.770380 |
| Mg4  | 4.960248  | 1.596688  | -0.857524 |
| Mg5  | 3.006181  | 3.132453  | 0.784734  |
| Mg6  | 3.019305  | -0.119475 | -2.686419 |
| Mg7  | 2.644174  | -2.633306 | 0.933933  |
| Mg8  | -0.606557 | 0.454590  | 3.154816  |
| Mg9  | -1.529426 | -5.517597 | 1.004165  |
| Mg10 | -2.259461 | -0.699579 | -2.974040 |
| Mg11 | -3.182945 | -3.239222 | 1.825484  |
| Mg12 | 4.892637  | -1.358705 | -0.627368 |
| Mg13 | -0.371012 | -1.979562 | 1.304010  |
| Mg14 | -1.366267 | 0.680025  | -0.083700 |
| Mg15 | -2.412045 | 4.271062  | 0.243001  |
| Mg16 | 4.145510  | 0.219425  | 1.820326  |
| Mg17 | 0.030907  | 3.082588  | 1.829857  |
| Mg18 | -2.113366 | -3.368118 | -1.282493 |
| Mg19 | -2.427590 | 2.532526  | -2.358374 |
| Mg20 | -2.841535 | 2.642804  | 2.715365  |
| Mg21 | 2.800318  | 2.891907  | -2.405680 |
| Mg22 | 1.545633  | 0.472799  | 0.163227  |
| Mg23 | 0.217496  | 3.511815  | -1.114307 |
| Mg24 | -4.070873 | -1.248552 | -0.505359 |
| Mg25 | 2.210237  | 1.730464  | 3.459134  |
| Mg26 | -4.866675 | 0.775645  | -2.696486 |
| Mg27 | 0.281167  | 1.166918  | -2.938198 |
| Mg28 | 1.874569  | -1.217438 | 3.400970  |
| Mg29 | 0.714916  | -4.544192 | -0.655245 |
| Mg30 | 2.993193  | -3.146197 | -2.100854 |

@mg30-isomer12 bp86/6-31G(d) Etot=-6002.896354 Eb=-16.85

|      |           |           |           |
|------|-----------|-----------|-----------|
| Mg1  | 1.724565  | -1.514793 | -3.074917 |
| Mg2  | 3.102939  | -0.271006 | 2.193582  |
| Mg3  | 1.483966  | 1.722070  | -2.848200 |
| Mg4  | -0.120998 | -0.991051 | 2.656589  |
| Mg5  | 4.565329  | -3.115391 | 1.443801  |
| Mg6  | -1.864744 | 1.434490  | 2.698810  |
| Mg7  | -4.450643 | 0.933872  | 1.285479  |
| Mg8  | -3.272468 | -1.630204 | 2.501418  |
| Mg9  | 1.144715  | -1.172751 | -0.151695 |
| Mg10 | 0.160684  | 4.077170  | 1.947261  |
| Mg11 | 1.069466  | 1.549752  | 3.548482  |
| Mg12 | -0.739306 | -3.566793 | 1.251989  |
| Mg13 | -0.732601 | -3.175051 | -1.872339 |
| Mg14 | -3.321437 | -3.819607 | -0.215257 |
| Mg15 | -5.159209 | -1.470247 | -0.248392 |
| Mg16 | -0.886375 | 0.011846  | -2.561517 |



|      |           |           |           |
|------|-----------|-----------|-----------|
| Mg17 | 1.890158  | 4.001372  | -0.719730 |
| Mg18 | 3.457620  | 1.291125  | -0.522828 |
| Mg19 | -3.456310 | -1.912803 | -2.641159 |
| Mg20 | -2.563490 | 3.105200  | 0.283243  |
| Mg21 | 4.185908  | -1.649409 | -1.048402 |
| Mg22 | 4.150202  | 0.371085  | -3.318966 |
| Mg23 | -3.729899 | 0.981342  | -1.818246 |
| Mg24 | 1.896942  | -3.201700 | 2.573307  |
| Mg25 | -1.988493 | -0.857421 | 0.026030  |
| Mg26 | 2.133197  | -4.019398 | -0.575356 |
| Mg27 | 3.044793  | 2.929478  | 1.951742  |
| Mg28 | 0.212619  | 1.512472  | 0.247850  |
| Mg29 | -1.190657 | 3.027959  | -2.387332 |
| Mg30 | -0.746475 | 5.418395  | -0.605247 |

@mg30-isomer13 bp86/6-31G(d) Etot=-6002.892973 Eb=-16.78

|      |           |           |           |
|------|-----------|-----------|-----------|
| Mg1  | 0.057667  | 0.650540  | 0.336318  |
| Mg2  | -2.594972 | -0.297119 | -0.118130 |
| Mg3  | -3.292160 | -2.250348 | 2.521659  |
| Mg4  | -3.976088 | -1.653972 | -2.394036 |
| Mg5  | 2.480150  | -3.022205 | 1.057436  |
| Mg6  | -3.795883 | 1.425441  | -2.728622 |
| Mg7  | 3.064956  | -2.777355 | -1.974824 |
| Mg8  | 4.583405  | -0.915725 | 2.366629  |
| Mg9  | 1.538023  | -0.822825 | -3.604334 |
| Mg10 | -5.345584 | -2.157068 | 0.365759  |
| Mg11 | -5.916737 | 0.436752  | -0.767190 |
| Mg12 | -4.144498 | 2.837102  | -0.167839 |
| Mg13 | 0.679167  | 2.270366  | 3.085298  |
| Mg14 | -1.476091 | 0.053877  | 3.137635  |
| Mg15 | -1.901383 | 2.891026  | 1.672139  |
| Mg16 | 3.396543  | 1.974585  | 1.990493  |
| Mg17 | 2.733419  | -0.198608 | -0.168619 |
| Mg18 | 5.305049  | -2.255042 | -0.120013 |
| Mg19 | 4.336677  | 0.126905  | -2.600991 |
| Mg20 | -2.636568 | -3.479179 | -0.256562 |
| Mg21 | -1.113049 | 0.188802  | -2.853305 |
| Mg22 | 1.286527  | 3.488817  | 0.303926  |
| Mg23 | 3.928475  | 2.698231  | -0.963524 |
| Mg24 | 0.071234  | -2.164194 | -1.162701 |
| Mg25 | 1.628493  | -0.584613 | 2.821478  |
| Mg26 | -1.392954 | 2.893615  | -1.374453 |
| Mg27 | 1.387047  | 1.923609  | -2.361203 |
| Mg28 | -4.379428 | 0.603993  | 2.094500  |
| Mg29 | -0.433310 | -2.582288 | 1.761042  |
| Mg30 | 5.921871  | 0.696879  | 0.102033  |

@mg30-isomer14 bp86/6-31G(d) Etot=-6002.891706 Eb=-16.75

|      |           |           |           |
|------|-----------|-----------|-----------|
| Mg1  | 0.792210  | 3.857691  | 0.820470  |
| Mg2  | 2.192485  | -0.482268 | 3.836590  |
| Mg3  | -1.186062 | -3.739804 | 1.230837  |
| Mg4  | -4.574521 | -0.150598 | 0.125157  |
| Mg5  | -1.433155 | 2.466513  | -0.971583 |
| Mg6  | 3.429313  | 1.922326  | -2.803942 |
| Mg7  | -3.029945 | 0.798914  | 2.727337  |
| Mg8  | 1.215209  | -1.806853 | 1.211451  |
| Mg9  | -1.407255 | -0.346245 | 0.380391  |
| Mg10 | 0.712459  | 0.684027  | -3.150498 |
| Mg11 | -3.519998 | -2.206090 | 2.179193  |
| Mg12 | -2.089910 | -0.167422 | -2.705680 |
| Mg13 | -0.898878 | -1.524911 | 3.431103  |
| Mg14 | 4.799342  | 1.163282  | -0.324286 |
| Mg15 | -4.129257 | 2.754569  | 0.581110  |
| Mg16 | 3.503887  | 3.896735  | -0.458587 |

|      |           |           |           |
|------|-----------|-----------|-----------|
| Mg17 | -4.258924 | 1.888686  | -2.271348 |
| Mg18 | -3.032048 | -2.619933 | -0.962729 |
| Mg19 | 0.049096  | -2.107070 | -1.615538 |
| Mg20 | 3.126184  | 1.938878  | 2.165827  |
| Mg21 | 0.085965  | 1.284253  | 2.581564  |
| Mg22 | -1.834229 | 3.593504  | 2.284237  |
| Mg23 | -4.940507 | -1.029791 | -2.811275 |
| Mg24 | 4.078239  | -1.015383 | 1.580271  |
| Mg25 | 1.384607  | 0.992094  | -0.219887 |
| Mg26 | 3.522964  | -3.617453 | 0.065754  |
| Mg27 | 2.293751  | -3.875328 | -2.676990 |
| Mg28 | 3.091376  | -1.031553 | -1.688294 |
| Mg29 | 0.938868  | -5.219687 | -0.294709 |
| Mg30 | 1.118736  | 3.698917  | -2.245946 |

@mg30-isomer15 bp86/6-31G(d) Etot=-6002.889867 Eb=-16.71

|      |           |           |           |
|------|-----------|-----------|-----------|
| Mg1  | 0.081056  | 0.742709  | 0.289400  |
| Mg2  | 1.703670  | 1.216213  | -2.685273 |
| Mg3  | -1.967174 | 1.355306  | 2.761944  |
| Mg4  | 3.277443  | 2.198204  | 1.701690  |
| Mg5  | -2.553037 | -0.194638 | -0.197614 |
| Mg6  | 0.119213  | -2.377620 | -0.159104 |
| Mg7  | 0.527341  | 3.132408  | 2.372950  |
| Mg8  | 5.814084  | 0.842307  | 0.174401  |
| Mg9  | -3.706637 | -0.302973 | -2.883470 |
| Mg10 | 1.197038  | 3.427618  | -0.578515 |
| Mg11 | -4.445198 | 2.239775  | 1.387353  |
| Mg12 | -2.336188 | -3.017702 | -1.966411 |
| Mg13 | -4.209632 | -0.942391 | 2.105557  |
| Mg14 | 2.355612  | -2.047315 | -2.433114 |
| Mg15 | 3.977815  | 2.789116  | -1.213267 |
| Mg16 | 1.312466  | 0.265159  | 3.144458  |
| Mg17 | -2.678663 | -3.515733 | 0.966893  |
| Mg18 | 2.720438  | -0.233040 | -0.117391 |
| Mg19 | -1.835844 | 3.330080  | 0.338179  |
| Mg20 | 4.630872  | 0.163463  | -2.602587 |
| Mg21 | -5.925299 | 0.327335  | -0.362530 |
| Mg22 | 5.394153  | -1.975549 | -0.568279 |
| Mg23 | -1.208397 | -1.493889 | 2.578593  |
| Mg24 | 1.487006  | -2.726150 | 2.671909  |
| Mg25 | -0.472408 | -0.858045 | -2.788405 |
| Mg26 | -1.222870 | 2.037527  | -2.369726 |
| Mg27 | 4.027061  | -1.039935 | 2.384632  |
| Mg28 | -4.073526 | 2.480741  | -1.533732 |
| Mg29 | 2.991102  | -3.455576 | 0.253382  |
| Mg30 | -4.981497 | -2.367407 | -0.671923 |

@mg30-isomer16 bp86/6-31G(d) Etot=-6002.887779 Eb=-16.67

|      |           |           |           |
|------|-----------|-----------|-----------|
| Mg1  | 0.777066  | 1.203444  | -0.394336 |
| Mg2  | 2.023830  | 1.183990  | -3.185462 |
| Mg3  | 1.588041  | -1.894335 | -0.486373 |
| Mg4  | -0.653632 | 3.416403  | -2.115132 |
| Mg5  | -3.651908 | 2.076121  | -1.710356 |
| Mg6  | -1.933992 | 3.229548  | 0.752980  |
| Mg7  | -0.985472 | 0.525729  | -3.016029 |
| Mg8  | 0.665879  | 4.811900  | 0.263366  |
| Mg9  | -3.575441 | -3.160327 | -0.252762 |
| Mg10 | 2.164706  | -2.243073 | 2.884850  |
| Mg11 | 3.933401  | -1.430137 | -2.400308 |
| Mg12 | 0.775378  | 0.197932  | 4.345497  |
| Mg13 | -5.273095 | -0.604794 | -0.181454 |
| Mg14 | -0.111683 | -0.722382 | 1.776324  |
| Mg15 | 3.988512  | 1.119461  | -0.770617 |
| Mg16 | 4.363315  | -1.761207 | 0.690389  |

|      |           |           |           |
|------|-----------|-----------|-----------|
| Mg17 | 0.496064  | -4.754681 | -1.117789 |
| Mg18 | -4.368388 | 1.631243  | 1.454575  |
| Mg19 | 2.511282  | 3.753233  | -1.794521 |
| Mg20 | 1.061207  | -1.613156 | -3.541339 |
| Mg21 | -3.234954 | -1.470502 | 2.240274  |
| Mg22 | -1.985729 | 1.246564  | 3.262673  |
| Mg23 | -0.860820 | -3.572478 | 1.449613  |
| Mg24 | 0.579121  | 2.577743  | 2.441862  |
| Mg25 | 2.942769  | 0.549303  | 2.090143  |
| Mg26 | -1.210928 | -2.403069 | -1.882404 |
| Mg27 | -3.813041 | -0.926105 | -2.660600 |
| Mg28 | -2.102569 | 0.029507  | -0.210286 |
| Mg29 | 2.706559  | -4.448915 | 0.911369  |
| Mg30 | 3.184521  | 3.453040  | 1.155852  |

@mg30-isomer17 bp86/6-31G(d) Etot=-6002.886171 Eb=-16.63

|      |           |           |           |
|------|-----------|-----------|-----------|
| Mg1  | -0.167170 | 0.069404  | 0.088827  |
| Mg2  | 3.324713  | 2.874870  | 0.829085  |
| Mg3  | 2.750596  | -0.041168 | -0.242578 |
| Mg4  | -3.143054 | -0.188661 | -0.489625 |
| Mg5  | -4.206487 | 0.690854  | -3.187153 |
| Mg6  | 1.796113  | 0.726061  | 2.640425  |
| Mg7  | 3.127360  | -2.003261 | 2.075892  |
| Mg8  | 3.737970  | -3.079257 | -0.843690 |
| Mg9  | -1.506789 | -2.736179 | -0.039417 |
| Mg10 | 0.016969  | -1.768862 | 2.653958  |
| Mg11 | -6.189039 | -0.796425 | -1.496916 |
| Mg12 | 5.847122  | 1.507510  | -0.446488 |
| Mg13 | 0.983356  | -2.288936 | -1.807209 |
| Mg14 | 3.633930  | 2.193283  | -2.251477 |
| Mg15 | -2.012695 | 2.550269  | 0.406431  |
| Mg16 | 1.145412  | 0.480697  | -2.984287 |
| Mg17 | 5.917665  | -1.434089 | 0.259373  |
| Mg18 | 1.205461  | -3.830526 | 0.715531  |
| Mg19 | 4.908051  | 0.586684  | 2.186822  |
| Mg20 | 4.716949  | -0.644998 | -2.427767 |
| Mg21 | -3.039749 | -1.228618 | 2.379145  |
| Mg22 | 0.860410  | 2.832182  | -0.997895 |
| Mg23 | -4.665085 | -2.790121 | 0.092727  |
| Mg24 | -1.486225 | 1.830395  | -2.566967 |
| Mg25 | -5.980086 | -0.437602 | 1.454848  |
| Mg26 | -1.522451 | -1.139008 | -2.990914 |
| Mg27 | 0.506291  | 3.290868  | 1.939325  |
| Mg28 | -1.220885 | 1.048874  | 3.096050  |
| Mg29 | -4.159054 | 1.703239  | 2.381623  |
| Mg30 | -5.179598 | 2.022519  | -0.427679 |

@mg30-isomer18 bp86/6-31G(d) Etot=-6002.885756 Eb=-16.63

|      |           |           |           |
|------|-----------|-----------|-----------|
| Mg1  | 1.088792  | -2.634133 | 1.951855  |
| Mg2  | 0.869898  | 0.254462  | 3.027961  |
| Mg3  | -1.458946 | -3.278989 | 0.372900  |
| Mg4  | -1.667798 | -1.384302 | 2.783597  |
| Mg5  | -2.231656 | 0.146076  | 0.107468  |
| Mg6  | -4.408366 | 0.431353  | 2.239282  |
| Mg7  | 0.725674  | -0.173970 | -0.111268 |
| Mg8  | 1.240903  | -3.191406 | -1.245365 |
| Mg9  | 2.725757  | 2.309044  | 1.884509  |
| Mg10 | 3.835065  | -1.644820 | -1.585299 |
| Mg11 | -0.212699 | 2.750798  | 0.871424  |
| Mg12 | -4.118246 | -2.659677 | 1.560123  |
| Mg13 | -1.302154 | 0.833765  | -3.705262 |
| Mg14 | 0.580274  | 2.427381  | -2.101082 |
| Mg15 | 3.365085  | 1.318268  | -1.391720 |
| Mg16 | 3.472775  | -0.635746 | 1.416282  |

|      |           |           |           |
|------|-----------|-----------|-----------|
| Mg17 | 5.251966  | 3.214737  | 0.265861  |
| Mg18 | 3.522914  | -3.719422 | 0.600097  |
| Mg19 | 6.202097  | -2.466221 | 0.500008  |
| Mg20 | -3.216255 | 3.391910  | 1.312444  |
| Mg21 | -1.300793 | -1.801608 | -2.275143 |
| Mg22 | -5.121157 | 2.025607  | -0.450165 |
| Mg23 | 2.393737  | 4.070751  | -0.407762 |
| Mg24 | 6.154045  | 0.438793  | -0.108709 |
| Mg25 | -5.779622 | -0.899414 | -0.201429 |
| Mg26 | -2.403232 | 2.803345  | -1.548643 |
| Mg27 | -1.763409 | 1.628855  | 3.212687  |
| Mg28 | -3.928272 | -3.036360 | -1.379832 |
| Mg29 | 1.394087  | -0.485168 | -3.139202 |
| Mg30 | -3.910465 | -0.033907 | -2.455617 |

@mg30-isomer19 bp86/6-31G(d) Etot=-6002.885403 Eb=-16.62

|      |           |           |           |
|------|-----------|-----------|-----------|
| Mg1  | 0.082841  | 0.643923  | -2.848567 |
| Mg2  | 1.642792  | -2.112797 | -2.794801 |
| Mg3  | -1.369041 | 3.580710  | -2.768271 |
| Mg4  | -3.097892 | 1.135335  | -2.610817 |
| Mg5  | 3.213433  | 0.459995  | -3.146942 |
| Mg6  | -1.482494 | -1.829883 | -2.373817 |
| Mg7  | -4.417514 | -1.478582 | -1.969781 |
| Mg8  | 3.117661  | -4.304457 | -1.208439 |
| Mg9  | 1.870927  | 3.129446  | -2.823620 |
| Mg10 | 0.241491  | -3.659010 | -0.502432 |
| Mg11 | 4.059704  | -1.436269 | -0.899803 |
| Mg12 | 0.093024  | 2.447589  | -0.300786 |
| Mg13 | -4.926903 | 0.770048  | -0.072379 |
| Mg14 | -2.997220 | 3.240304  | -0.289800 |
| Mg15 | -1.209458 | 3.439551  | 2.223001  |
| Mg16 | -2.890539 | -3.044800 | 0.117008  |
| Mg17 | 1.111929  | -0.554614 | -0.004881 |
| Mg18 | -1.908916 | 0.103800  | 0.129315  |
| Mg19 | 3.204325  | 1.781679  | -0.407587 |
| Mg20 | -5.801109 | -2.100010 | 0.621262  |
| Mg21 | 2.606777  | -3.075566 | 1.465279  |
| Mg22 | 6.180230  | 0.999595  | 0.288531  |
| Mg23 | 4.530493  | 2.567800  | 2.267874  |
| Mg24 | -0.688462 | -2.204654 | 1.978476  |
| Mg25 | -3.692748 | 1.908937  | 2.403566  |
| Mg26 | -3.640117 | -1.127811 | 2.456875  |
| Mg27 | 1.587178  | 1.724307  | 2.271446  |
| Mg28 | -1.025152 | 0.534475  | 3.238800  |
| Mg29 | 1.604100  | -1.065905 | 3.576944  |
| Mg30 | 4.000660  | -0.473137 | 1.984344  |

@mg30-isomer20 bp86/6-31G(d) Etot=-6002.884954 Eb=-16.61

|      |           |           |           |
|------|-----------|-----------|-----------|
| Mg1  | 2.679994  | 3.760247  | -0.855568 |
| Mg2  | 0.015465  | 2.228043  | -0.600658 |
| Mg3  | 4.019328  | -3.566700 | 1.144526  |
| Mg4  | 1.123535  | -2.759824 | -0.022960 |
| Mg5  | 3.786907  | -0.378101 | -3.937859 |
| Mg6  | -3.762906 | -0.207042 | -2.633052 |
| Mg7  | 4.226041  | 2.530147  | 1.310931  |
| Mg8  | 1.425135  | 3.325016  | 1.971897  |
| Mg9  | -3.643112 | -2.691528 | 1.800113  |
| Mg10 | 2.955343  | 0.999149  | 3.401218  |
| Mg11 | -2.958381 | 0.126211  | 2.794960  |
| Mg12 | -4.645618 | 2.547551  | 1.624506  |
| Mg13 | -0.815653 | -2.505357 | 2.572231  |
| Mg14 | 4.388107  | 1.224387  | -1.437647 |
| Mg15 | -6.122540 | 2.313775  | -0.974757 |
| Mg16 | 2.169770  | -1.820643 | 2.744386  |

|      |           |           |           |
|------|-----------|-----------|-----------|
| Mg17 | 4.758915  | -0.623659 | 1.322047  |
| Mg18 | 1.906069  | 1.921998  | -3.118882 |
| Mg19 | -1.007889 | 0.856312  | -3.153377 |
| Mg20 | 2.011180  | 0.216152  | 0.191411  |
| Mg21 | -3.005365 | 2.318999  | -1.057959 |
| Mg22 | -1.647285 | -4.079464 | 0.076144  |
| Mg23 | -4.554062 | -0.215522 | 0.271281  |
| Mg24 | 0.072493  | 0.531529  | 2.500220  |
| Mg25 | 3.903737  | -1.945397 | -1.321014 |
| Mg26 | 1.213278  | -1.054361 | -2.499052 |
| Mg27 | -1.424239 | -2.470665 | -2.598512 |
| Mg28 | -1.321162 | -0.599982 | -0.080398 |
| Mg29 | -1.763965 | 2.836841  | 1.763347  |
| Mg30 | -3.983118 | -2.818111 | -1.197524 |

@mg30-isomer21 bp86/6-31G(d) Etot=-6002.884068 Eb=-16.59

|      |           |           |           |
|------|-----------|-----------|-----------|
| Mg1  | 0.014388  | -4.388520 | 0.175883  |
| Mg2  | -0.277851 | 0.366527  | 2.716971  |
| Mg3  | 4.935839  | 0.718216  | 1.058953  |
| Mg4  | -0.106777 | 3.711160  | -0.304234 |
| Mg5  | 2.750824  | 2.867286  | 0.481526  |
| Mg6  | 2.670105  | 0.841807  | 3.068252  |
| Mg7  | 1.248515  | -2.276107 | 2.380273  |
| Mg8  | 4.442102  | 1.495123  | -1.771838 |
| Mg9  | -0.098169 | -0.061553 | -3.484935 |
| Mg10 | -1.637293 | -2.382949 | -2.245664 |
| Mg11 | -4.401677 | -2.149545 | -1.225795 |
| Mg12 | 0.591407  | 3.185065  | 2.573284  |
| Mg13 | -3.226377 | 0.365740  | -2.608220 |
| Mg14 | -3.973883 | 0.286800  | 0.460521  |
| Mg15 | -2.298428 | 5.297789  | 0.986948  |
| Mg16 | 1.840433  | 0.033282  | 0.270752  |
| Mg17 | 4.383811  | -1.498344 | -1.046813 |
| Mg18 | 1.315937  | -2.167067 | -1.609894 |
| Mg19 | -1.373330 | -1.796961 | 0.870745  |
| Mg20 | -4.181374 | -2.677399 | 1.746389  |
| Mg21 | -2.474491 | 2.429865  | 2.041914  |
| Mg22 | 2.959055  | -3.707680 | 0.423845  |
| Mg23 | -3.184500 | -0.400868 | 3.361519  |
| Mg24 | 2.911053  | -0.352175 | -3.462290 |
| Mg25 | 4.216459  | -1.788435 | 2.320557  |
| Mg26 | -0.903020 | 0.829332  | -0.458329 |
| Mg27 | 1.593338  | 2.158282  | -2.374523 |
| Mg28 | -1.463204 | 2.716460  | -3.118733 |
| Mg29 | -3.347291 | 2.995954  | -0.813844 |
| Mg30 | -2.925600 | -4.651084 | -0.413218 |

@mg30-isomer22 bp86/6-31G(d) Etot=-6002.882314 Eb=-16.55

|      |           |           |           |
|------|-----------|-----------|-----------|
| Mg1  | 1.478552  | 0.224854  | 0.031686  |
| Mg2  | 3.135878  | -2.098465 | 1.710906  |
| Mg3  | 3.185639  | -2.696529 | -1.207909 |
| Mg4  | -1.509498 | -0.341618 | 0.023110  |
| Mg5  | -2.242911 | -3.073993 | 1.682133  |
| Mg6  | -2.563183 | -0.651741 | 3.480512  |
| Mg7  | 1.520987  | 3.414665  | 1.887958  |
| Mg8  | 1.607969  | 3.873043  | -1.036952 |
| Mg9  | 4.903789  | -0.055209 | -1.164481 |
| Mg10 | 5.500716  | 0.121779  | 1.808417  |
| Mg11 | 0.429989  | -1.779793 | -2.455852 |
| Mg12 | 0.175342  | 1.320421  | -2.556907 |
| Mg13 | -4.561268 | -0.897251 | 1.293789  |
| Mg14 | -4.693927 | -3.549253 | -0.068531 |
| Mg15 | 3.890587  | 2.291011  | 0.503414  |
| Mg16 | -4.474052 | -0.962395 | -1.694706 |

|      |           |           |           |
|------|-----------|-----------|-----------|
| Mg17 | -2.992682 | 1.796090  | -2.112621 |
| Mg18 | 2.671706  | 0.706149  | 2.910923  |
| Mg19 | -0.396201 | 1.342836  | 2.695287  |
| Mg20 | -2.102296 | -0.690497 | -3.490692 |
| Mg21 | -0.997939 | 2.790428  | 0.092377  |
| Mg22 | -3.828249 | 3.875575  | -0.108529 |
| Mg23 | -3.362136 | 1.885616  | 2.041150  |
| Mg24 | 2.877943  | -0.541172 | -3.409360 |
| Mg25 | -2.118191 | -3.069250 | -1.463343 |
| Mg26 | 0.492125  | -2.932797 | 0.256940  |
| Mg27 | 5.942145  | -2.469896 | 0.368247  |
| Mg28 | 3.349590  | 2.177007  | -2.592861 |
| Mg29 | 0.323453  | -1.531934 | 2.858330  |
| Mg30 | -5.643879 | 1.522318  | -0.282435 |

@mg30-isomer23 bp86/6-31G(d) Etot=-6002.881354 Eb=-16.53

|      |           |           |           |
|------|-----------|-----------|-----------|
| Mg1  | -0.478068 | 1.043529  | 0.124958  |
| Mg2  | -3.408092 | 1.515951  | 1.876691  |
| Mg3  | 0.602221  | 3.866936  | -0.670122 |
| Mg4  | 1.314584  | 0.548424  | 2.941373  |
| Mg5  | 1.012211  | 1.510332  | -2.684360 |
| Mg6  | 2.174701  | 3.181176  | 1.801381  |
| Mg7  | -4.371342 | -1.517597 | 2.692766  |
| Mg8  | -5.194379 | -2.983716 | 0.174345  |
| Mg9  | 3.726705  | 0.428502  | -3.208962 |
| Mg10 | 2.227239  | -0.302629 | -0.184844 |
| Mg11 | 4.490489  | -2.164977 | 1.051681  |
| Mg12 | 1.382568  | -1.568016 | -2.879144 |
| Mg13 | -4.821097 | -1.119480 | -2.279939 |
| Mg14 | 4.490468  | -2.250734 | -2.141161 |
| Mg15 | 4.144450  | 0.903989  | 1.858489  |
| Mg16 | -2.412263 | 3.875786  | 0.186647  |
| Mg17 | -3.856650 | 1.598929  | -1.254323 |
| Mg18 | -1.551654 | -0.239840 | -2.513356 |
| Mg19 | 3.629381  | -1.387778 | 3.877572  |
| Mg20 | -1.662275 | 3.037581  | -2.612761 |
| Mg21 | -1.229225 | -1.023882 | 2.633123  |
| Mg22 | -0.796640 | 2.855976  | 2.565114  |
| Mg23 | 1.433605  | -2.502686 | 2.222170  |
| Mg24 | -0.301155 | -2.214494 | -0.293868 |
| Mg25 | -2.770364 | -3.310958 | -1.754560 |
| Mg26 | 5.505543  | 0.178891  | -0.786527 |
| Mg27 | -6.029749 | -0.048141 | 0.576349  |
| Mg28 | 2.349381  | -3.506013 | -0.566282 |
| Mg29 | -2.909105 | -0.908077 | 0.147130  |
| Mg30 | 3.308511  | 2.503018  | -0.899579 |

@mg30-isomer24 bp86/6-31G(d) Etot=-6002.880621 Eb=-16.52

|      |           |           |           |
|------|-----------|-----------|-----------|
| Mg1  | 0.348446  | -0.288528 | -0.170159 |
| Mg2  | 3.069354  | -1.410594 | 2.199955  |
| Mg3  | 3.735392  | -3.395807 | -0.068043 |
| Mg4  | 1.974906  | 1.452946  | 1.760724  |
| Mg5  | 1.568547  | -2.459767 | -1.964988 |
| Mg6  | 3.421064  | -0.279053 | -0.747790 |
| Mg7  | -0.674092 | 2.765040  | 0.581933  |
| Mg8  | -1.249177 | -1.133581 | -2.809107 |
| Mg9  | 0.141771  | -1.011180 | 2.880429  |
| Mg10 | 4.279017  | 3.131771  | 0.113665  |
| Mg11 | -2.522406 | 0.257337  | 0.119197  |
| Mg12 | -2.769485 | -0.380248 | 3.400333  |
| Mg13 | 5.993861  | -1.604180 | 0.728296  |
| Mg14 | -6.289792 | -0.998375 | -1.188320 |
| Mg15 | -1.107110 | -3.824481 | -1.288638 |
| Mg16 | -4.025126 | 0.603910  | -2.502538 |

|      |           |           |           |
|------|-----------|-----------|-----------|
| Mg17 | 4.215844  | 1.787252  | -2.780625 |
| Mg18 | -2.016077 | -2.516953 | 1.278740  |
| Mg19 | -5.024187 | -0.958659 | 1.505501  |
| Mg20 | -5.821717 | 1.628118  | 0.053953  |
| Mg21 | -3.472829 | 3.166238  | -0.808922 |
| Mg22 | 1.449255  | 0.356020  | -3.107025 |
| Mg23 | -3.656023 | -2.329921 | -1.365622 |
| Mg24 | 0.956188  | -3.367192 | 0.987507  |
| Mg25 | -1.077562 | 1.872641  | -2.362500 |
| Mg26 | -3.670511 | 2.271047  | 2.132671  |
| Mg27 | 6.306029  | 1.090468  | -0.700160 |
| Mg28 | 1.620181  | 2.774165  | -1.323113 |
| Mg29 | -0.742081 | 1.820204  | 3.384567  |
| Mg30 | 5.038322  | 0.981362  | 2.060079  |

@mg30-isomer25 bp86/6-31G(d) Etot=-6002.880273 Eb=-16.51

|      |           |           |           |
|------|-----------|-----------|-----------|
| Mg1  | -0.475779 | 2.369268  | -2.540751 |
| Mg2  | -1.555094 | 3.520303  | 0.088731  |
| Mg3  | 0.116280  | 0.533273  | -0.092377 |
| Mg4  | -1.583575 | -0.698453 | -2.567975 |
| Mg5  | -3.381254 | 2.079635  | -1.798477 |
| Mg6  | 1.321758  | -1.554595 | -2.116814 |
| Mg7  | 5.550565  | 1.351791  | -1.102100 |
| Mg8  | -0.804009 | -2.868400 | -0.425838 |
| Mg9  | 1.465254  | 3.988733  | -0.791182 |
| Mg10 | -5.992008 | 1.010538  | -0.143497 |
| Mg11 | -2.841958 | -0.312974 | 0.106104  |
| Mg12 | 0.803423  | 3.215206  | 2.068916  |
| Mg13 | 3.736599  | -3.225387 | -0.750632 |
| Mg14 | -3.520761 | -3.144932 | 1.484495  |
| Mg15 | -5.849007 | -1.968084 | 0.087176  |
| Mg16 | -1.591671 | 1.388718  | 2.407938  |
| Mg17 | -4.783857 | -0.506687 | -2.430644 |
| Mg18 | 6.224658  | -1.474126 | -0.308098 |
| Mg19 | 1.511574  | 0.193437  | 2.655037  |
| Mg20 | 1.494437  | -2.691326 | 1.410565  |
| Mg21 | 3.415333  | 2.524904  | 0.964171  |
| Mg22 | 4.454086  | -2.227971 | 2.083478  |
| Mg23 | -1.044682 | -1.590649 | 2.397885  |
| Mg24 | 3.109256  | -0.341619 | 0.130071  |
| Mg25 | -4.099294 | 2.665049  | 1.342686  |
| Mg26 | -4.604655 | -0.263245 | 2.405819  |
| Mg27 | 5.604089  | 0.536427  | 1.872612  |
| Mg28 | 2.507278  | 1.551434  | -2.152561 |
| Mg29 | 4.404999  | -0.932641 | -2.692502 |
| Mg30 | -3.591986 | -3.127628 | -1.592236 |

@mg30-isomer26 bp86/6-31G(d) Etot=-6002.878540 Eb=-16.47

|      |           |           |           |
|------|-----------|-----------|-----------|
| Mg1  | 0.729692  | -0.721766 | -2.893466 |
| Mg2  | 0.404042  | 1.900538  | 2.348392  |
| Mg3  | -0.330437 | -3.191443 | 1.461115  |
| Mg4  | -0.058544 | -0.205400 | 0.091450  |
| Mg5  | 4.723181  | 2.312384  | 0.289940  |
| Mg6  | 0.740288  | -0.977538 | 3.273938  |
| Mg7  | 2.822785  | -0.112803 | -0.127061 |
| Mg8  | 4.764189  | -2.747101 | -0.457166 |
| Mg9  | -1.430287 | -2.522901 | -1.362418 |
| Mg10 | -3.337000 | -3.091802 | 0.956074  |
| Mg11 | -5.990174 | -1.857056 | -0.257407 |
| Mg12 | -5.206901 | -0.049236 | -2.514366 |
| Mg13 | -2.090201 | 0.343353  | -2.774217 |
| Mg14 | -3.926028 | 2.202623  | 1.665038  |
| Mg15 | 1.645516  | -2.909737 | -0.878067 |
| Mg16 | 2.945317  | 3.829727  | 2.161342  |

|      |           |           |           |
|------|-----------|-----------|-----------|
| Mg17 | 1.632657  | 2.754393  | -0.298828 |
| Mg18 | 3.150604  | 1.416473  | -2.670761 |
| Mg19 | 5.526232  | -0.490135 | 1.434862  |
| Mg20 | -3.249779 | -0.241367 | -0.205215 |
| Mg21 | -1.412721 | 2.523577  | -0.193251 |
| Mg22 | -4.163662 | 2.571822  | -1.364906 |
| Mg23 | 0.180537  | 2.270374  | -2.873708 |
| Mg24 | -6.364655 | 1.133817  | 0.135995  |
| Mg25 | -2.034648 | -0.370708 | 2.491313  |
| Mg26 | 3.173935  | 0.802603  | 2.833520  |
| Mg27 | 2.877626  | -2.376574 | 1.885201  |
| Mg28 | -5.066084 | -0.570856 | 2.287864  |
| Mg29 | 5.735440  | 0.010603  | -1.486991 |
| Mg30 | 3.609080  | -1.635863 | -2.958217 |

@mg30-isomer27 bp86/6-31G(d) Etot=-6002.876543 Eb=-16.43

|      |           |           |           |
|------|-----------|-----------|-----------|
| Mg1  | 5.866880  | 1.868589  | 0.872890  |
| Mg2  | 5.546899  | -0.129817 | -1.214567 |
| Mg3  | 1.079224  | 2.042167  | -2.383328 |
| Mg4  | -2.519408 | -0.772959 | 1.714784  |
| Mg5  | 2.241265  | -3.230986 | 1.436644  |
| Mg6  | -1.316978 | -4.030818 | -2.073540 |
| Mg7  | -5.144578 | 1.057381  | 1.404519  |
| Mg8  | -2.585335 | 2.256890  | 2.317520  |
| Mg9  | -0.626024 | -3.127794 | 2.665812  |
| Mg10 | 1.501297  | 4.100369  | -0.109978 |
| Mg11 | 2.933220  | 1.942820  | 1.458338  |
| Mg12 | -0.008376 | -0.911914 | -2.672018 |
| Mg13 | -2.879593 | -3.762365 | 0.653870  |
| Mg14 | 4.417030  | -2.834319 | -0.645688 |
| Mg15 | 1.706360  | -3.480996 | -1.662186 |
| Mg16 | -5.245680 | -1.814684 | 0.413035  |
| Mg17 | -3.566776 | 3.155526  | -0.429333 |
| Mg18 | 4.252398  | -0.851762 | 1.657675  |
| Mg19 | -4.989246 | 0.620341  | -1.466868 |
| Mg20 | 3.955217  | 2.656053  | -1.327075 |
| Mg21 | -0.600022 | 1.319428  | 0.061190  |
| Mg22 | -2.224540 | 1.382866  | -2.587357 |
| Mg23 | -2.856042 | -1.516083 | -1.617634 |
| Mg24 | -0.244073 | -1.870054 | 0.045950  |
| Mg25 | -1.091536 | 4.151883  | -1.872751 |
| Mg26 | 2.349631  | -0.299647 | -0.893246 |
| Mg27 | -0.105465 | -5.093024 | 0.424988  |
| Mg28 | -1.343156 | 4.724929  | 1.000257  |
| Mg29 | 0.388610  | 2.807305  | 2.557231  |
| Mg30 | 1.108796  | -0.359325 | 2.270866  |

@mg30-isomer28 bp86/6-31G(d) Etot=-6002.871432 Eb=-16.33

|      |           |           |           |
|------|-----------|-----------|-----------|
| Mg1  | -0.776560 | 0.788232  | -0.167857 |
| Mg2  | -3.614228 | 1.790876  | 1.319003  |
| Mg3  | -0.427896 | -2.081939 | 0.737254  |
| Mg4  | -1.150381 | 3.317795  | 2.106206  |
| Mg5  | -2.207751 | 3.481418  | -0.860334 |
| Mg6  | 0.863786  | -1.794271 | 3.406681  |
| Mg7  | 0.941763  | 1.073488  | 2.792073  |
| Mg8  | 0.572644  | 3.079533  | -2.241835 |
| Mg9  | 3.254262  | 1.796431  | -2.069133 |
| Mg10 | 0.944723  | 0.119572  | -3.066297 |
| Mg11 | -3.256937 | -1.177655 | 0.401503  |
| Mg12 | 0.958280  | -2.634128 | -1.878771 |
| Mg13 | -1.835635 | -1.326978 | -2.395116 |
| Mg14 | 3.556409  | -4.191900 | -1.654706 |
| Mg15 | 1.639153  | 2.881583  | 0.522626  |
| Mg16 | 4.665171  | 3.448020  | -0.017465 |



|      |           |           |           |
|------|-----------|-----------|-----------|
| Mg17 | 3.884567  | 1.890192  | 2.392510  |
| Mg18 | -5.180743 | -0.514748 | 2.668260  |
| Mg19 | 2.066735  | -0.257543 | 0.101669  |
| Mg20 | -1.749044 | 1.655114  | -3.374237 |
| Mg21 | -3.958524 | 1.009494  | -1.633539 |
| Mg22 | 5.068455  | -2.494529 | 0.217220  |
| Mg23 | -6.546842 | 0.090963  | -0.095526 |
| Mg24 | -4.918398 | -1.880186 | -2.103441 |
| Mg25 | -1.762887 | -0.168747 | 2.884694  |
| Mg26 | 3.783466  | -1.189152 | -2.335337 |
| Mg27 | 3.778126  | -1.120596 | 2.653648  |
| Mg28 | 5.165059  | 0.436393  | -0.001739 |
| Mg29 | 2.294100  | -3.357132 | 1.037833  |
| Mg30 | -6.050873 | -2.669601 | 0.654152  |

@mg30-isomer29 bp86/6-31G(d) Etot=-6002.871389 Eb=-16.33

|      |           |           |           |
|------|-----------|-----------|-----------|
| Mg1  | 0.601557  | -0.187909 | 0.071558  |
| Mg2  | 1.368447  | -3.617827 | 0.348996  |
| Mg3  | 0.492864  | -2.476118 | 2.900796  |
| Mg4  | 1.477799  | 2.319377  | -1.912950 |
| Mg5  | 4.284988  | 0.859112  | -2.300093 |
| Mg6  | 0.155025  | -2.360066 | -2.213677 |
| Mg7  | -1.053117 | 2.556021  | -0.189112 |
| Mg8  | 3.183366  | -1.734069 | -1.123457 |
| Mg9  | 6.122431  | -1.110406 | 1.739732  |
| Mg10 | -1.531292 | -0.197841 | 2.553220  |
| Mg11 | -0.969881 | 0.582792  | -2.634503 |
| Mg12 | -3.500973 | 2.282351  | 1.940513  |
| Mg13 | -2.824895 | -1.964003 | -2.561762 |
| Mg14 | -4.616215 | -2.453529 | -0.132513 |
| Mg15 | -3.743254 | 2.305362  | -1.975727 |
| Mg16 | 1.466765  | 0.335619  | 3.063109  |
| Mg17 | 4.134252  | 3.255076  | -0.536355 |
| Mg18 | -4.778561 | -0.406718 | 2.175031  |
| Mg19 | 1.757725  | -0.188284 | -3.500236 |
| Mg20 | -5.379033 | -0.261253 | -2.155268 |
| Mg21 | -1.474753 | -2.586313 | 0.378738  |
| Mg22 | -5.848799 | 1.779459  | 0.143949  |
| Mg23 | -7.240592 | -0.793041 | 0.294710  |
| Mg24 | 3.600708  | 0.570875  | 0.877623  |
| Mg25 | 6.569899  | 1.382333  | 0.019890  |
| Mg26 | 1.617650  | 2.819259  | 1.081887  |
| Mg27 | 3.354258  | -2.161774 | 2.179372  |
| Mg28 | -0.694735 | 2.674801  | 2.916829  |
| Mg29 | 6.304736  | -1.270571 | -1.260337 |
| Mg30 | -2.836371 | 0.047285  | -0.189961 |

@mg30-isomer30 bp86/6-31G(d) Etot=-6002.870013 Eb=-16.30

|      |           |           |           |
|------|-----------|-----------|-----------|
| Mg1  | 0.051057  | -0.429754 | -2.989217 |
| Mg2  | 2.655627  | 1.252430  | -2.924947 |
| Mg3  | 5.143020  | 1.869717  | -0.965784 |
| Mg4  | 1.539594  | -2.356176 | 1.820007  |
| Mg5  | -2.276412 | -2.124604 | -1.590974 |
| Mg6  | -1.363622 | -2.872094 | 1.194393  |
| Mg7  | -0.490041 | 0.211109  | 0.023083  |
| Mg8  | -3.329661 | -0.126405 | 1.017886  |
| Mg9  | -2.912768 | 3.133684  | -0.323352 |
| Mg10 | 2.451576  | 2.973445  | -0.305427 |
| Mg11 | -4.338794 | -3.022201 | 0.585144  |
| Mg12 | -0.100889 | 2.512482  | -2.028337 |
| Mg13 | 0.709040  | -2.673109 | -1.040464 |
| Mg14 | -5.610518 | 1.701134  | -0.205809 |
| Mg15 | -6.382702 | -0.833604 | 1.459043  |
| Mg16 | 2.513536  | -0.140970 | -0.138583 |

|      |           |           |           |
|------|-----------|-----------|-----------|
| Mg17 | -2.809126 | 0.785732  | -2.079339 |
| Mg18 | 5.353821  | -0.708598 | -2.474455 |
| Mg19 | -8.248224 | -0.192241 | -0.661782 |
| Mg20 | 4.315483  | 1.370463  | 1.939998  |
| Mg21 | -5.343735 | -0.999597 | -1.493246 |
| Mg22 | -0.584280 | -0.500808 | 3.001888  |
| Mg23 | 6.297797  | -0.495100 | 0.368268  |
| Mg24 | -1.928416 | 2.165595  | 2.301713  |
| Mg25 | 4.098977  | -2.690695 | -0.458512 |
| Mg26 | 2.694551  | -1.811633 | -3.133157 |
| Mg27 | 1.199756  | 1.903278  | 2.246508  |
| Mg28 | 2.384762  | -0.262633 | 3.880454  |
| Mg29 | -0.222190 | 4.037616  | 0.581420  |
| Mg30 | 4.532779  | -1.676463 | 2.393579  |

@mg30-isomer31 bp86/6-31G(d) Etot=-6002.869157 Eb=-16.28

|      |           |           |           |
|------|-----------|-----------|-----------|
| Mg1  | 0.708191  | -1.611147 | -2.945895 |
| Mg2  | -0.680310 | -0.465256 | -0.167850 |
| Mg3  | 2.343819  | -0.147963 | 0.139824  |
| Mg4  | -2.262771 | -1.306431 | -2.732922 |
| Mg5  | 0.102003  | 1.313604  | -2.537449 |
| Mg6  | -0.524435 | -3.508799 | -0.965249 |
| Mg7  | 0.822754  | 2.528206  | 0.191442  |
| Mg8  | -2.131188 | 2.238160  | 1.300821  |
| Mg9  | 2.900820  | -1.358617 | 3.316088  |
| Mg10 | -5.423718 | -1.264808 | -2.184090 |
| Mg11 | 3.071825  | -2.635317 | -1.469077 |
| Mg12 | 4.623977  | -2.633829 | 1.152256  |
| Mg13 | -6.107633 | -1.239696 | 0.844930  |
| Mg14 | -3.459593 | -2.598345 | -0.153351 |
| Mg15 | 1.564394  | -2.985432 | 1.182235  |
| Mg16 | -3.434327 | 0.722453  | -0.958884 |
| Mg17 | -3.158688 | -0.579678 | 2.151773  |
| Mg18 | 0.144054  | 3.002228  | 3.076690  |
| Mg19 | 5.250274  | 0.144757  | 1.957820  |
| Mg20 | 3.068979  | 0.202948  | -2.992817 |
| Mg21 | 2.485712  | 3.131703  | -2.327020 |
| Mg22 | -5.194018 | 1.609271  | 1.717028  |
| Mg23 | 4.149087  | 2.382912  | 0.115602  |
| Mg24 | 5.354559  | 2.165464  | -2.574682 |
| Mg25 | -6.620032 | 1.201266  | -0.938070 |
| Mg26 | -4.492702 | 3.559551  | -0.505987 |
| Mg27 | 5.379007  | -0.430594 | -1.022414 |
| Mg28 | 2.734408  | 1.641146  | 2.748178  |
| Mg29 | 0.149566  | -0.067843 | 2.678088  |
| Mg30 | -1.364012 | -3.009918 | 1.902981  |

@mg30-isomer32 bp86/6-31G(d) Etot=-6002.868481 Eb=-16.26

|      |           |           |           |
|------|-----------|-----------|-----------|
| Mg1  | 0.748766  | -0.988150 | 0.150768  |
| Mg2  | -1.615131 | -2.879578 | -0.125193 |
| Mg3  | -4.043008 | -1.805539 | 1.408786  |
| Mg4  | 3.277682  | 0.118010  | 1.713740  |
| Mg5  | 5.923707  | -1.146181 | 0.397002  |
| Mg6  | 1.004249  | -1.525295 | 3.120052  |
| Mg7  | 0.540453  | -0.290487 | -2.912704 |
| Mg8  | -4.045900 | -2.024454 | -1.782709 |
| Mg9  | 4.089861  | 2.500869  | -1.438241 |
| Mg10 | 1.534652  | -3.279774 | -1.767234 |
| Mg11 | -4.600784 | 1.297740  | 1.430563  |
| Mg12 | -1.217279 | -2.652336 | -3.028953 |
| Mg13 | -1.599732 | -3.044677 | 2.882489  |
| Mg14 | -1.949877 | 0.348879  | -0.128900 |
| Mg15 | -2.009256 | -0.153799 | 3.017383  |
| Mg16 | 1.254773  | 1.842984  | -0.988522 |

|      |           |           |           |
|------|-----------|-----------|-----------|
| Mg17 | -1.508084 | 2.619296  | -2.136845 |
| Mg18 | 2.945872  | 3.126398  | 1.293423  |
| Mg19 | 5.838904  | 1.821455  | 0.929937  |
| Mg20 | 6.349954  | 0.577505  | -2.009281 |
| Mg21 | 3.365952  | -0.629298 | -1.566957 |
| Mg22 | -0.343434 | 3.896623  | 0.481377  |
| Mg23 | -4.489893 | 1.636243  | -1.731560 |
| Mg24 | 0.465747  | 1.404894  | 2.189504  |
| Mg25 | 3.437539  | -2.839173 | 0.641824  |
| Mg26 | -2.456542 | 0.024169  | -3.320811 |
| Mg27 | 0.919801  | -4.084407 | 1.275394  |
| Mg28 | -2.260301 | 2.768379  | 2.480483  |
| Mg29 | -6.129531 | -0.505819 | -0.435047 |
| Mg30 | -3.429161 | 3.865524  | -0.039764 |

@mg30-isomer33 bp86/6-31G(d) Etot=-6002.867980 Eb=-16.25

|      |           |           |           |
|------|-----------|-----------|-----------|
| Mg1  | -0.941186 | -0.795794 | -0.228491 |
| Mg2  | -1.764573 | -3.769418 | 1.777438  |
| Mg3  | -0.043379 | 0.147740  | -3.084024 |
| Mg4  | 0.048293  | -1.308762 | 2.846130  |
| Mg5  | -2.978351 | -1.044502 | 2.128669  |
| Mg6  | -0.105205 | 2.233756  | -0.772799 |
| Mg7  | 1.123698  | -2.556652 | -2.288879 |
| Mg8  | 1.918353  | 3.185435  | 1.471476  |
| Mg9  | 1.856313  | 1.044428  | 3.568452  |
| Mg10 | -3.011492 | 1.984476  | 0.180252  |
| Mg11 | -0.789320 | 1.458298  | 2.163277  |
| Mg12 | -5.236429 | -0.227307 | 0.215652  |
| Mg13 | -5.382869 | 2.053954  | -1.880585 |
| Mg14 | 1.870570  | 0.153723  | 0.183379  |
| Mg15 | -6.168020 | 2.555730  | 1.014063  |
| Mg16 | 4.345442  | 1.355216  | 1.853466  |
| Mg17 | 3.058458  | -1.539308 | 2.449678  |
| Mg18 | -3.541672 | -2.717584 | -0.541939 |
| Mg19 | -1.129390 | -4.509349 | -1.037052 |
| Mg20 | 1.689882  | 4.739254  | -1.120759 |
| Mg21 | 5.836006  | -1.423832 | 1.473308  |
| Mg22 | 1.055489  | -3.140183 | 0.667220  |
| Mg23 | 3.021344  | -0.125196 | -2.850433 |
| Mg24 | -1.855449 | -2.506399 | -3.086144 |
| Mg25 | 1.735736  | 2.589497  | -3.248395 |
| Mg26 | 3.766739  | 2.667186  | -1.016677 |
| Mg27 | 3.683562  | -2.322100 | -0.642038 |
| Mg28 | -3.197690 | 0.053319  | -2.277051 |
| Mg29 | -4.173302 | 1.545389  | 3.001792  |
| Mg30 | 5.308444  | 0.218984  | -0.918986 |

@mg30-isomer34 bp86/6-31G(d) Etot=-6002.866008 Eb=-16.21

|      |           |           |           |
|------|-----------|-----------|-----------|
| Mg1  | -0.466377 | 1.276568  | 1.457173  |
| Mg2  | 1.229134  | -0.911511 | 2.876532  |
| Mg3  | -0.763947 | -1.658652 | 0.667871  |
| Mg4  | 1.929649  | 2.026933  | 3.214059  |
| Mg5  | 3.549499  | -2.685607 | 3.364666  |
| Mg6  | -2.074678 | 3.129450  | -0.318058 |
| Mg7  | -3.237965 | -0.263927 | 2.834549  |
| Mg8  | -3.086609 | 0.104228  | 0.014977  |
| Mg9  | -5.985493 | -0.540231 | 1.515093  |
| Mg10 | 0.480834  | -2.250564 | -2.113740 |
| Mg11 | 4.206377  | 0.199675  | 2.475825  |
| Mg12 | 0.803405  | 4.094583  | 1.367198  |
| Mg13 | -4.662713 | 2.308962  | 1.211008  |
| Mg14 | 5.245204  | 0.490606  | -0.451833 |
| Mg15 | 2.076160  | 0.028343  | 0.018851  |
| Mg16 | -0.745839 | 0.539099  | -1.801748 |

|      |           |           |           |
|------|-----------|-----------|-----------|
| Mg17 | 4.024460  | 2.585066  | -2.238120 |
| Mg18 | 3.489375  | -1.970378 | -1.870231 |
| Mg19 | 3.557470  | 2.808116  | 0.771504  |
| Mg20 | -6.845571 | 1.326940  | -0.617138 |
| Mg21 | -1.500536 | -4.335358 | -0.658197 |
| Mg22 | 1.973022  | 0.329345  | -3.165823 |
| Mg23 | -2.623383 | -1.842666 | -2.208404 |
| Mg24 | -5.541887 | -1.204840 | -1.512227 |
| Mg25 | 4.859685  | -2.196830 | 0.793067  |
| Mg26 | 5.041763  | 0.090085  | -3.442428 |
| Mg27 | 1.159851  | 2.737649  | -1.247932 |
| Mg28 | -3.876570 | -2.764291 | 0.556207  |
| Mg29 | -4.114870 | 1.617189  | -2.139578 |
| Mg30 | 1.900553  | -3.067983 | 0.646879  |

@mg30-isomer35 bp86/6-31G(d) Etot=-6002.854883 Eb=-15.98

|      |           |           |           |
|------|-----------|-----------|-----------|
| Mg1  | -0.293494 | -1.337016 | -0.708317 |
| Mg2  | -2.143233 | -2.214667 | 1.503184  |
| Mg3  | 2.292421  | 0.143383  | 0.229325  |
| Mg4  | -1.653400 | -0.158562 | -3.172879 |
| Mg5  | -3.651102 | -1.348917 | -1.136918 |
| Mg6  | 3.856664  | 3.101357  | 1.447346  |
| Mg7  | -5.139022 | -2.309517 | 1.491431  |
| Mg8  | 0.907184  | -2.064987 | -3.466886 |
| Mg9  | 1.033778  | -2.308705 | 1.805229  |
| Mg10 | -6.789606 | -2.113744 | -1.040848 |
| Mg11 | 2.292581  | 1.032020  | 3.293453  |
| Mg12 | -0.484353 | 0.405361  | 2.121640  |
| Mg13 | 2.520290  | 2.925013  | -1.175646 |
| Mg14 | -2.250515 | 3.010737  | 1.311473  |
| Mg15 | -6.071406 | 0.759802  | -1.605878 |
| Mg16 | 3.621977  | -1.662687 | 3.077334  |
| Mg17 | 2.329667  | -3.002543 | -1.009451 |
| Mg18 | 3.564811  | -4.168227 | 1.426220  |
| Mg19 | 5.170553  | 1.218415  | -0.773037 |
| Mg20 | 4.237385  | 1.782942  | -3.580344 |
| Mg21 | 4.935341  | -1.746638 | 0.167859  |
| Mg22 | 0.859681  | 3.095965  | 1.684010  |
| Mg23 | 3.897118  | -1.017503 | -2.627821 |
| Mg24 | 5.227725  | 0.583219  | 2.117302  |
| Mg25 | -6.901229 | 0.112110  | 1.210627  |
| Mg26 | 1.406863  | 0.778120  | -2.992617 |
| Mg27 | -0.332680 | 1.772835  | -0.793167 |
| Mg28 | -3.280206 | 1.657312  | -1.339864 |
| Mg29 | -5.441501 | 2.722597  | 0.835537  |
| Mg30 | -3.722292 | 0.352523  | 1.701705  |

@mg30-isomer36 bp86/6-31G(d) Etot=-6002.847352 Eb=-15.82

|      |           |           |           |
|------|-----------|-----------|-----------|
| Mg1  | -1.742909 | -0.458481 | 1.412844  |
| Mg2  | 0.939785  | 0.050739  | -0.419432 |
| Mg3  | 1.343231  | -3.134595 | -0.564327 |
| Mg4  | 4.269653  | -2.565627 | -1.096135 |
| Mg5  | -4.716890 | -0.866077 | 2.051306  |
| Mg6  | 0.859991  | 0.034090  | -3.490943 |
| Mg7  | 2.338237  | -2.700988 | -3.512217 |
| Mg8  | 1.021208  | 0.067726  | 2.714590  |
| Mg9  | -3.793554 | 1.740430  | 0.674403  |
| Mg10 | 3.043249  | -2.053382 | 1.658434  |
| Mg11 | -4.982955 | -0.458996 | -0.967559 |
| Mg12 | -2.941807 | -3.219855 | 2.711126  |
| Mg13 | -0.639369 | 2.322814  | 0.711509  |
| Mg14 | 4.246061  | -2.326746 | 4.563954  |
| Mg15 | 0.192691  | -2.794082 | 2.362125  |
| Mg16 | -2.854848 | 4.460541  | 1.566550  |

|      |           |           |           |
|------|-----------|-----------|-----------|
| Mg17 | -2.001686 | 0.122289  | -1.642460 |
| Mg18 | -3.657419 | -2.634568 | -2.497774 |
| Mg19 | 4.115398  | 0.290039  | -0.035894 |
| Mg20 | -0.055871 | 5.505217  | 1.641810  |
| Mg21 | 2.593731  | 2.193445  | -1.976643 |
| Mg22 | -4.735745 | -3.324997 | 0.257467  |
| Mg23 | -0.478343 | 2.635590  | -2.455894 |
| Mg24 | -1.605122 | 5.305327  | -1.017659 |
| Mg25 | 2.339373  | 2.492168  | 1.208492  |
| Mg26 | 3.884351  | -0.257874 | -3.084527 |
| Mg27 | 3.971349  | 0.560823  | 3.017740  |
| Mg28 | -1.743658 | -3.120049 | -0.122783 |
| Mg29 | 1.365659  | 4.626142  | -0.836793 |
| Mg30 | -0.573791 | -2.491062 | -2.831310 |

@mg30-isomer37 bp86/6-31G(d) Etot=-6002.838061 Eb=-15.63

|      |           |           |           |
|------|-----------|-----------|-----------|
| Mg1  | 2.083367  | -0.250419 | 0.145379  |
| Mg2  | 0.418567  | -3.234137 | -1.762682 |
| Mg3  | 0.433794  | 1.939045  | -1.190855 |
| Mg4  | -0.338213 | 1.454233  | 1.923028  |
| Mg5  | -0.875996 | -0.709786 | -0.298374 |
| Mg6  | 2.112009  | 3.045057  | 1.373804  |
| Mg7  | -3.734499 | -0.185543 | -1.155207 |
| Mg8  | 1.344048  | -0.528004 | -2.841584 |
| Mg9  | -5.483799 | 2.043033  | 0.197562  |
| Mg10 | -2.447014 | 2.403059  | -0.234996 |
| Mg11 | 2.225455  | 0.886730  | 3.519925  |
| Mg12 | 3.555242  | 2.142270  | -1.225807 |
| Mg13 | -3.338204 | 0.519741  | 2.199168  |
| Mg14 | -2.636857 | -3.084944 | -1.414064 |
| Mg15 | 1.742101  | 4.888582  | -1.042954 |
| Mg16 | -1.065497 | 4.565982  | -1.974796 |
| Mg17 | 3.925649  | -1.403385 | 2.293847  |
| Mg18 | -3.528737 | -2.384662 | 1.508759  |
| Mg19 | -6.170827 | -0.656757 | 1.281746  |
| Mg20 | 5.274458  | -0.439940 | -0.518240 |
| Mg21 | -6.867892 | 0.033915  | -1.619384 |
| Mg22 | -0.805801 | -3.697825 | 0.965310  |
| Mg23 | 2.164720  | -3.426084 | 0.683043  |
| Mg24 | 5.165354  | -3.336096 | 0.293150  |
| Mg25 | 3.417885  | -2.584854 | -2.033760 |
| Mg26 | -0.566282 | 4.665502  | 0.920839  |
| Mg27 | 4.606855  | 1.462063  | 1.686001  |
| Mg28 | 4.375442  | 0.029313  | -3.367069 |
| Mg29 | -5.530574 | -2.645925 | -0.896204 |
| Mg30 | 0.545244  | -1.510163 | 2.584416  |

@mg30-isomer38 bp86/6-31G(d) Etot=-6002.813045 Eb=-15.10

|      |           |           |           |
|------|-----------|-----------|-----------|
| Mg1  | -0.259267 | 2.221742  | -1.603086 |
| Mg2  | 1.976695  | -0.042521 | -1.734717 |
| Mg3  | -0.984319 | 2.814659  | 1.502669  |
| Mg4  | -3.855809 | 1.969848  | 1.773022  |
| Mg5  | -6.954404 | 2.024464  | 1.455490  |
| Mg6  | 1.850555  | 2.473762  | 0.583420  |
| Mg7  | 4.581765  | 1.972188  | 2.458365  |
| Mg8  | -0.677886 | -1.298545 | -2.306628 |
| Mg9  | -0.103969 | -0.024253 | 0.575110  |
| Mg10 | -1.490583 | -3.052257 | 0.179382  |
| Mg11 | 2.788408  | -0.295137 | 1.483703  |
| Mg12 | 1.440150  | -2.850545 | -0.590509 |
| Mg13 | -2.886087 | 0.207335  | -0.708985 |
| Mg14 | -3.062761 | -3.196131 | -2.350691 |
| Mg15 | -5.132645 | -0.964803 | -2.525668 |
| Mg16 | 2.591716  | 2.747969  | -2.714058 |

|      |           |           |           |
|------|-----------|-----------|-----------|
| Mg17 | -7.062066 | -0.579915 | -0.185674 |
| Mg18 | 0.541889  | -2.419270 | 2.398850  |
| Mg19 | 4.800363  | 0.383437  | -3.083233 |
| Mg20 | -5.439492 | 1.784895  | -1.254413 |
| Mg21 | 7.088154  | -0.365702 | -1.028822 |
| Mg22 | -2.911138 | 3.455775  | -0.737560 |
| Mg23 | 7.306455  | 1.526788  | 1.334409  |
| Mg24 | 4.553757  | 1.426519  | -0.403464 |
| Mg25 | -5.508898 | -0.539516 | 2.461192  |
| Mg26 | -2.469671 | -0.836732 | 2.222578  |
| Mg27 | 5.823268  | -1.098634 | 1.697956  |
| Mg28 | 3.572764  | -3.211786 | 1.793681  |
| Mg29 | -4.501606 | -2.386158 | 0.248099  |
| Mg30 | 4.384664  | -1.847476 | -0.940418 |

@mg30-isomer39 bp86/6-31G(d) Etot=-6002.806706 Eb=-14.97

|      |           |           |           |
|------|-----------|-----------|-----------|
| Mg1  | 2.929798  | -0.413179 | 2.114079  |
| Mg2  | 0.569559  | -0.203306 | 0.004869  |
| Mg3  | 3.631689  | -0.383630 | -0.862574 |
| Mg4  | -0.338330 | -3.438119 | -0.495313 |
| Mg5  | 1.502251  | -2.049191 | -2.351459 |
| Mg6  | -0.051562 | 1.023884  | 2.600510  |
| Mg7  | 5.915618  | -1.379878 | -2.477425 |
| Mg8  | -2.627509 | -1.888021 | 0.517004  |
| Mg9  | 1.437407  | 0.949685  | -2.698344 |
| Mg10 | -1.400557 | -0.863346 | -2.180315 |
| Mg11 | -2.779702 | -0.241570 | 3.060305  |
| Mg12 | 2.426280  | -3.009684 | 0.463160  |
| Mg13 | -2.403318 | 2.834894  | 2.681067  |
| Mg14 | 5.441014  | -2.573813 | 0.479994  |
| Mg15 | 1.228979  | 3.884107  | -2.053580 |
| Mg16 | -0.392401 | 3.218701  | 0.437515  |
| Mg17 | 2.475195  | 2.275039  | 0.176752  |
| Mg18 | -5.134015 | 1.754138  | 2.029549  |
| Mg19 | 5.167933  | 1.803270  | 1.292619  |
| Mg20 | -4.651748 | -0.671002 | -1.523881 |
| Mg21 | -7.271537 | 0.687394  | -0.043689 |
| Mg22 | -1.288000 | 2.298582  | -2.442986 |
| Mg23 | 0.025659  | -2.123122 | 2.314884  |
| Mg24 | 5.253543  | 1.950032  | -1.759995 |
| Mg25 | -7.306996 | -2.268582 | -0.621698 |
| Mg26 | -5.371254 | -1.174818 | 1.583670  |
| Mg27 | -7.361979 | -0.362688 | -2.892313 |
| Mg28 | -2.635546 | 1.132426  | -0.016114 |
| Mg29 | 7.067920  | -0.046126 | -0.069869 |
| Mg30 | 5.941610  | -0.722079 | 2.733576  |

@mg30-isomer40 bp86/6-31G(d) Etot=-6002.802573 Eb=-14.89

|      |           |           |           |
|------|-----------|-----------|-----------|
| Mg1  | 1.066117  | 1.946011  | -1.448798 |
| Mg2  | -1.399624 | 2.596827  | 0.773071  |
| Mg3  | 3.163105  | 0.073222  | 0.485075  |
| Mg4  | -4.196601 | 2.291389  | 2.117757  |
| Mg5  | 3.755693  | 0.811986  | -2.347793 |
| Mg6  | -2.869424 | -0.262579 | 1.080450  |
| Mg7  | 6.097586  | 2.221172  | -0.551204 |
| Mg8  | 1.609412  | 2.453739  | 1.687389  |
| Mg9  | -4.146012 | -0.976535 | -1.792124 |
| Mg10 | 1.080792  | -1.017606 | -2.028609 |
| Mg11 | 4.592769  | 2.500285  | 2.059875  |
| Mg12 | -1.477627 | 0.535115  | -1.662643 |
| Mg13 | -3.999900 | 2.119908  | -1.015687 |
| Mg14 | 5.992983  | -0.160815 | 1.670987  |
| Mg15 | -6.397048 | 0.782915  | 0.453287  |
| Mg16 | 3.799757  | -2.299732 | -1.721426 |

|      |           |           |           |
|------|-----------|-----------|-----------|
| Mg17 | 0.247944  | -0.158609 | 0.977231  |
| Mg18 | 6.358709  | -3.034631 | 0.457054  |
| Mg19 | 0.524434  | 4.768327  | -0.215605 |
| Mg20 | -5.322560 | -0.503651 | 2.854513  |
| Mg21 | -7.619231 | -1.863701 | 1.404242  |
| Mg22 | -4.714200 | -2.590758 | 0.590907  |
| Mg23 | -7.154995 | -1.815590 | -1.462403 |
| Mg24 | 3.960647  | -4.707761 | 0.221649  |
| Mg25 | -6.453903 | 0.963047  | -2.481220 |
| Mg26 | 6.268199  | -0.627165 | -1.312867 |
| Mg27 | 3.807883  | -2.305089 | 2.140369  |
| Mg28 | 1.436452  | -2.952876 | 0.296986  |
| Mg29 | -1.464829 | -2.352308 | -0.598033 |
| Mg30 | 3.453473  | 3.565464  | -0.632430 |

@mg31-isomer01 bp86/6-31G(d) Etot=-6203.036228 Eb=-17.72

|      |           |           |           |
|------|-----------|-----------|-----------|
| Mg1  | -3.138603 | -3.479491 | -1.969888 |
| Mg2  | -1.020375 | -1.536763 | -0.065164 |
| Mg3  | 1.657504  | -0.000120 | -0.000034 |
| Mg4  | -0.623805 | 4.783683  | 0.939008  |
| Mg5  | -4.091403 | -1.515260 | 0.320688  |
| Mg6  | 0.031202  | -0.612372 | 2.726972  |
| Mg7  | 1.846674  | -3.106894 | -0.601814 |
| Mg8  | -1.019995 | 1.537068  | 0.065219  |
| Mg9  | -0.233285 | -2.411530 | -2.915424 |
| Mg10 | 5.099620  | -0.384936 | 2.469992  |
| Mg11 | -2.888429 | -0.588399 | -2.465694 |
| Mg12 | 2.644435  | 2.121252  | -2.270058 |
| Mg13 | 0.031257  | 0.612368  | -2.726957 |
| Mg14 | 1.847172  | 3.106646  | 0.601857  |
| Mg15 | -4.091074 | 1.515751  | -0.320689 |
| Mg16 | -2.551157 | 2.319507  | -2.886508 |
| Mg17 | 0.069807  | 3.698596  | -1.918554 |
| Mg18 | 4.418468  | 1.565080  | 0.291554  |
| Mg19 | -0.624526 | -4.783589 | -0.939011 |
| Mg20 | 2.644125  | -2.121608 | 2.270009  |
| Mg21 | 2.546399  | -1.153723 | -2.889236 |
| Mg22 | 2.546616  | 1.153334  | 2.889245  |
| Mg23 | 0.069177  | -3.698566 | 1.918494  |
| Mg24 | -2.551525 | -2.319169 | 2.886581  |
| Mg25 | -2.888260 | 0.588780  | 2.465625  |
| Mg26 | 4.418251  | -1.565742 | -0.291594 |
| Mg27 | -2.938815 | -4.422928 | 0.876212  |
| Mg28 | 5.099654  | 0.384168  | -2.470021 |
| Mg29 | -0.232864 | 2.411585  | 2.915506  |
| Mg30 | -2.938164 | 4.423379  | -0.876194 |
| Mg31 | -3.138082 | 3.479890  | 1.969876  |

@mg31-isomer02 bp86/6-31G(d) Etot=-6203.032421 Eb=-17.65

|      |           |           |           |
|------|-----------|-----------|-----------|
| Mg1  | 2.828154  | 0.475353  | 3.493122  |
| Mg2  | 0.281592  | 1.779600  | 2.629022  |
| Mg3  | 0.273404  | -1.170709 | 3.207694  |
| Mg4  | 3.134183  | 2.873602  | 1.516633  |
| Mg5  | -2.388035 | 0.331895  | 3.038425  |
| Mg6  | -2.168870 | 3.495186  | 2.258386  |
| Mg7  | 0.674084  | -4.070164 | 2.097926  |
| Mg8  | 2.759583  | -1.940787 | 1.608759  |
| Mg9  | -2.161820 | -2.794672 | 2.376921  |
| Mg10 | -4.548866 | 2.014673  | 1.562565  |
| Mg11 | 4.851074  | 0.328976  | 1.418587  |
| Mg12 | 0.231759  | 3.871090  | 0.427086  |
| Mg13 | 1.580527  | 0.718594  | -0.032177 |
| Mg14 | -0.596543 | -5.333042 | -0.202256 |
| Mg15 | -3.856535 | -0.910625 | 0.683120  |

|      |           |           |           |
|------|-----------|-----------|-----------|
| Mg16 | -1.512954 | 1.084549  | -0.037224 |
| Mg17 | 2.673548  | 3.733378  | -1.385291 |
| Mg18 | -0.297035 | -1.649350 | 0.119541  |
| Mg19 | 2.033533  | -3.800832 | -0.750404 |
| Mg20 | -2.863119 | 3.727683  | -0.718177 |
| Mg21 | 3.855019  | -1.170923 | -1.074350 |
| Mg22 | -2.975236 | -3.585196 | -0.492508 |
| Mg23 | -4.723934 | 1.300640  | -1.265672 |
| Mg24 | 0.039830  | 2.779795  | -2.367329 |
| Mg25 | 2.582447  | 1.015879  | -3.012686 |
| Mg26 | -0.675176 | -3.247274 | -2.503497 |
| Mg27 | -0.218864 | -0.177334 | -2.813825 |
| Mg28 | -2.637646 | 1.759180  | -3.189570 |
| Mg29 | 4.835305  | 1.785698  | -1.126164 |
| Mg30 | 2.018126  | -2.064895 | -3.214441 |
| Mg31 | -3.027537 | -1.159968 | -2.252216 |

@mg31-isomer03 bp86/6-31G(d) Etot=-6203.032281 Eb=-17.64

|      |           |           |           |
|------|-----------|-----------|-----------|
| Mg1  | 2.365421  | 3.012396  | -2.589925 |
| Mg2  | 4.631054  | 2.112809  | -1.003018 |
| Mg3  | 2.172280  | 3.495180  | 0.526464  |
| Mg4  | -3.526256 | -1.812040 | -0.374473 |
| Mg5  | 1.394014  | 1.743261  | 2.977577  |
| Mg6  | -1.494372 | 0.918409  | 0.123745  |
| Mg7  | -2.213359 | -4.630968 | 0.323768  |
| Mg8  | -2.598210 | 2.400717  | -2.876930 |
| Mg9  | 4.509447  | -0.698681 | 0.094794  |
| Mg10 | -2.209577 | -2.197570 | 2.382349  |
| Mg11 | 1.654618  | 0.463500  | 0.118606  |
| Mg12 | 0.130059  | 0.978465  | -2.634839 |
| Mg13 | 0.080676  | -4.237301 | 2.096428  |
| Mg14 | -3.797184 | 2.781642  | 2.012836  |
| Mg15 | 2.550274  | -2.783767 | 1.169139  |
| Mg16 | -4.284542 | -0.068657 | 1.999112  |
| Mg17 | -0.286040 | -1.748605 | -0.285806 |
| Mg18 | 2.933598  | -2.692366 | -1.733361 |
| Mg19 | 0.536954  | -1.139735 | 2.739466  |
| Mg20 | 3.504551  | -0.632847 | 3.063292  |
| Mg21 | -3.164651 | 4.078081  | -0.501722 |
| Mg22 | 3.064450  | 0.062610  | -2.788571 |
| Mg23 | 4.370592  | 1.907298  | 1.948620  |
| Mg24 | 0.644591  | -4.607080 | -0.960303 |
| Mg25 | -0.793686 | 3.492097  | 1.644167  |
| Mg26 | -1.971931 | -3.501474 | -2.402967 |
| Mg27 | 0.539092  | -1.924064 | -3.272919 |
| Mg28 | -4.434791 | 1.205686  | -0.824371 |
| Mg29 | -0.281069 | 3.737787  | -1.340299 |
| Mg30 | -2.423778 | -0.586695 | -2.884991 |
| Mg31 | -1.602226 | 0.871910  | 3.254131  |

@mg31-isomer04 bp86/6-31G(d) Etot=-6203.032240 Eb=-17.64

|      |           |           |           |
|------|-----------|-----------|-----------|
| Mg1  | -1.827214 | 0.000365  | -2.771522 |
| Mg2  | 1.872551  | -0.000246 | 0.050971  |
| Mg3  | -0.815106 | 4.370016  | 1.740478  |
| Mg4  | -3.833107 | 2.153530  | -1.635649 |
| Mg5  | -0.858211 | -1.555874 | -0.103835 |
| Mg6  | -2.459907 | 4.690055  | -0.675516 |
| Mg7  | -0.857661 | 1.556059  | -0.103943 |
| Mg8  | 0.749396  | -4.099240 | -1.007395 |
| Mg9  | -3.833871 | -2.152245 | -1.635854 |
| Mg10 | 1.718269  | 2.759515  | 1.624593  |
| Mg11 | 1.717350  | -2.760055 | 1.624357  |
| Mg12 | -2.461427 | -4.689161 | -0.675753 |
| Mg13 | 4.372033  | 1.469730  | 1.843310  |



|      |           |           |           |
|------|-----------|-----------|-----------|
| Mg14 | -0.816500 | -4.369909 | 1.740234  |
| Mg15 | -1.414551 | 3.084324  | -2.981593 |
| Mg16 | 4.371581  | -1.471224 | 1.843195  |
| Mg17 | -3.605321 | 0.000501  | 0.300239  |
| Mg18 | 1.947424  | -0.000400 | 3.169531  |
| Mg19 | 5.415851  | -0.000825 | -0.558154 |
| Mg20 | -0.706484 | 1.518739  | 2.992589  |
| Mg21 | 1.086252  | -1.530613 | -2.711370 |
| Mg22 | 3.464910  | 2.451477  | -0.951313 |
| Mg23 | -3.370868 | 0.000399  | 3.259959  |
| Mg24 | 3.703389  | -0.000479 | -2.885157 |
| Mg25 | -3.368534 | 2.710936  | 1.583356  |
| Mg26 | 3.464119  | -2.452465 | -0.951472 |
| Mg27 | -0.706969 | -1.518834 | 2.992752  |
| Mg28 | -1.415542 | -3.083723 | -2.981727 |
| Mg29 | 1.086881  | 1.530632  | -2.711502 |
| Mg30 | 0.750707  | 4.099063  | -1.007135 |
| Mg31 | -3.369439 | -2.710049 | 1.583326  |

@mg31-isomer05 bp86/6-31G(d) Etot=-6203.031901 Eb=-17.64

|      |           |           |           |
|------|-----------|-----------|-----------|
| Mg1  | 2.228869  | 2.964067  | -0.749668 |
| Mg2  | -0.135011 | -0.391337 | -2.775817 |
| Mg3  | 3.225776  | 2.747703  | 2.110777  |
| Mg4  | -3.431706 | -3.320068 | 2.010507  |
| Mg5  | 0.894117  | 0.759015  | 2.474774  |
| Mg6  | 1.610704  | -0.527374 | -0.209252 |
| Mg7  | 4.366209  | 0.911853  | -0.025844 |
| Mg8  | -2.772855 | -2.137148 | -2.871203 |
| Mg9  | 3.837926  | 0.031098  | 3.077949  |
| Mg10 | 2.436253  | -3.497885 | -0.277918 |
| Mg11 | -2.646136 | 3.695194  | -1.913630 |
| Mg12 | 0.145322  | 2.613540  | -3.012174 |
| Mg13 | -3.964457 | -0.473921 | 2.455349  |
| Mg14 | -1.103320 | -1.414141 | 3.198636  |
| Mg15 | -0.607804 | 1.675031  | -0.225028 |
| Mg16 | 4.667352  | -1.494633 | -1.815479 |
| Mg17 | -0.152006 | 4.996443  | -0.910744 |
| Mg18 | -2.908167 | -4.218432 | -0.694830 |
| Mg19 | -4.455496 | -1.446179 | -0.427337 |
| Mg20 | -2.849829 | 0.809361  | -2.509831 |
| Mg21 | 0.414692  | 3.791502  | 1.860033  |
| Mg22 | -0.189247 | -3.267362 | -1.749479 |
| Mg23 | -1.461140 | -1.102194 | 0.161419  |
| Mg24 | 1.781357  | -2.185917 | 2.477819  |
| Mg25 | -2.426732 | 4.342232  | 1.022083  |
| Mg26 | -3.739258 | 1.600656  | 0.248566  |
| Mg27 | -1.937557 | 1.745845  | 2.712060  |
| Mg28 | 2.236471  | -2.196652 | -3.168999 |
| Mg29 | 4.619600  | -1.969355 | 1.135674  |
| Mg30 | 2.764158  | 0.841564  | -2.867396 |
| Mg31 | -0.448086 | -3.882507 | 1.258983  |

@mg31-isomer06 bp86/6-31G(d) Etot=-6203.031292 Eb=-17.62

|      |           |           |           |
|------|-----------|-----------|-----------|
| Mg1  | 0.689608  | -0.647172 | 2.840204  |
| Mg2  | 3.239298  | -2.277138 | 2.520204  |
| Mg3  | 0.638389  | -3.671207 | 2.063181  |
| Mg4  | -2.078410 | -4.553594 | 0.920489  |
| Mg5  | -2.028277 | -1.939669 | 2.634228  |
| Mg6  | -1.704974 | 1.262461  | 3.181209  |
| Mg7  | 3.604487  | 0.683098  | 2.879981  |
| Mg8  | -3.587715 | -2.008952 | -0.108477 |
| Mg9  | -4.128621 | 0.045729  | 1.979155  |
| Mg10 | -3.955222 | 2.969556  | 1.634612  |
| Mg11 | 0.363882  | -4.936270 | -0.806591 |

|      |           |           |           |
|------|-----------|-----------|-----------|
| Mg12 | 2.464105  | -2.743688 | -0.419621 |
| Mg13 | -2.198194 | -3.974075 | -2.060779 |
| Mg14 | 1.059841  | 2.360315  | 2.721709  |
| Mg15 | 4.547481  | -0.653732 | 0.206971  |
| Mg16 | 1.616472  | 0.572033  | 0.097304  |
| Mg17 | -0.455216 | -1.702363 | -0.128972 |
| Mg18 | -1.477149 | 1.065279  | 0.066291  |
| Mg19 | -1.153625 | 3.960510  | 1.267910  |
| Mg20 | -4.372403 | 0.936199  | -0.969085 |
| Mg21 | 4.291603  | 2.399323  | 0.541305  |
| Mg22 | 1.734268  | 3.936759  | 0.283604  |
| Mg23 | 5.288485  | 1.216810  | -2.088361 |
| Mg24 | -2.386460 | -1.070176 | -2.726450 |
| Mg25 | 2.969458  | -0.704358 | -2.620974 |
| Mg26 | 0.512804  | -2.564195 | -2.908991 |
| Mg27 | -3.283796 | 3.894821  | -1.061708 |
| Mg28 | 0.162747  | 0.497319  | -2.738419 |
| Mg29 | 2.558720  | 2.387179  | -2.234141 |
| Mg30 | -0.350155 | 3.353922  | -1.774589 |
| Mg31 | -2.581430 | 1.905275  | -3.191201 |

@mg31-isomer07 bp86/6-31G(d) Etot=-6203.030465 Eb=-17.61

|      |           |           |           |
|------|-----------|-----------|-----------|
| Mg1  | 2.424215  | 2.802946  | -0.312991 |
| Mg2  | -0.015672 | 0.761180  | 2.927183  |
| Mg3  | 3.064693  | 1.720460  | -3.049634 |
| Mg4  | -3.446431 | -3.859157 | -1.055757 |
| Mg5  | 0.679181  | -0.193067 | -2.520154 |
| Mg6  | 1.562061  | -0.559559 | 0.376690  |
| Mg7  | 4.353263  | 0.490918  | -0.493176 |
| Mg8  | -2.962238 | -0.428567 | 2.591745  |
| Mg9  | 3.609157  | -1.211218 | -3.086922 |
| Mg10 | 2.292881  | -3.374530 | 1.361018  |
| Mg11 | -1.834332 | 5.260557  | 1.267876  |
| Mg12 | 0.715761  | 3.645352  | 2.117160  |
| Mg13 | -4.070603 | -1.241437 | -2.301378 |
| Mg14 | -1.272371 | -2.543569 | -2.815002 |
| Mg15 | -0.500471 | 1.644411  | -0.019651 |
| Mg16 | 4.623076  | -1.278807 | 2.020132  |
| Mg17 | 0.319274  | 5.065135  | -0.673883 |
| Mg18 | -2.995416 | -3.484743 | 1.876978  |
| Mg19 | -4.876445 | -1.669931 | 0.549780  |
| Mg20 | -2.448935 | 2.533347  | 2.242111  |
| Mg21 | 0.266474  | 2.854181  | -2.765744 |
| Mg22 | -0.322079 | -2.206708 | 2.499406  |
| Mg23 | -1.533656 | -1.149279 | -0.162365 |
| Mg24 | 1.592831  | -3.005453 | -1.731129 |
| Mg25 | -2.459301 | 3.683754  | -1.303934 |
| Mg26 | -3.772651 | 1.111748  | -0.136479 |
| Mg27 | -2.171787 | 0.988553  | -2.757787 |
| Mg28 | 2.235979  | -1.138286 | 3.620637  |
| Mg29 | 4.469970  | -2.565084 | -0.635757 |
| Mg30 | 3.033277  | 1.481299  | 2.341700  |
| Mg31 | -0.559707 | -4.134446 | 0.029326  |

@mg31-isomer08 bp86/6-31G(d) Etot=-6203.030266 Eb=-17.60

|     |           |           |           |
|-----|-----------|-----------|-----------|
| Mg1 | 2.056150  | -0.584778 | -3.759210 |
| Mg2 | 1.549178  | 2.083019  | -2.400675 |
| Mg3 | 4.397804  | 0.466462  | -2.388318 |
| Mg4 | -0.756448 | 0.289303  | -2.943184 |
| Mg5 | -1.398806 | 3.391419  | -2.314799 |
| Mg6 | 0.216937  | -2.521121 | -2.567958 |
| Mg7 | 3.274664  | -2.380915 | -1.642646 |
| Mg8 | 0.814263  | 4.116824  | -0.227202 |
| Mg9 | -2.987297 | -1.747918 | -2.382687 |

|      |           |           |           |
|------|-----------|-----------|-----------|
| Mg10 | 3.548409  | 2.404940  | -0.227039 |
| Mg11 | 1.603591  | -0.240550 | -0.079283 |
| Mg12 | -3.567775 | 1.294938  | -2.423592 |
| Mg13 | -1.849144 | -4.468785 | -1.356166 |
| Mg14 | 4.822705  | -0.445205 | 0.438215  |
| Mg15 | -2.014764 | 5.329579  | -0.096597 |
| Mg16 | 0.962656  | -3.968020 | -0.047914 |
| Mg17 | -1.106912 | -1.525858 | 0.076800  |
| Mg18 | -0.942471 | 1.417946  | -0.044420 |
| Mg19 | 3.274279  | -2.787260 | 1.395217  |
| Mg20 | 0.449779  | -2.494474 | 2.630801  |
| Mg21 | -1.688987 | -4.450492 | 1.640012  |
| Mg22 | 2.571594  | -0.403297 | 3.030823  |
| Mg23 | 4.653242  | 1.680554  | 2.554373  |
| Mg24 | -3.768631 | 2.957056  | 0.144455  |
| Mg25 | 1.616982  | 2.329279  | 2.063729  |
| Mg26 | -1.268230 | 3.495167  | 2.166983  |
| Mg27 | -3.971393 | -0.122461 | 0.187105  |
| Mg28 | -0.435345 | 0.357729  | 2.850813  |
| Mg29 | -3.974983 | -3.142999 | 0.292124  |
| Mg30 | -2.763399 | -1.700935 | 2.715854  |
| Mg31 | -3.317650 | 1.370854  | 2.714385  |

@mg31-isomer09 bp86/6-31G(d) Etot=-6203.030063 Eb=-17.60

|      |           |           |           |
|------|-----------|-----------|-----------|
| Mg1  | -2.299101 | 2.267159  | -2.716665 |
| Mg2  | 2.129712  | -1.537333 | -3.130199 |
| Mg3  | -3.066902 | -0.796286 | -3.446691 |
| Mg4  | 0.860255  | 2.587860  | -2.979573 |
| Mg5  | 3.547022  | 1.152695  | -2.693987 |
| Mg6  | 2.566166  | 3.542909  | -0.629630 |
| Mg7  | -0.377392 | 0.006252  | -2.464848 |
| Mg8  | 5.128156  | 1.562257  | -0.261971 |
| Mg9  | -3.826367 | 3.544133  | -0.504525 |
| Mg10 | -0.598959 | -2.904346 | -2.797001 |
| Mg11 | 1.724338  | 0.626264  | -0.175472 |
| Mg12 | -0.640109 | 4.081434  | -0.747208 |
| Mg13 | 4.000546  | -1.344670 | -0.755196 |
| Mg14 | -4.150973 | 0.473699  | -0.851614 |
| Mg15 | 3.566970  | 2.535051  | 2.084534  |
| Mg16 | -1.387305 | 1.184668  | 0.227828  |
| Mg17 | 1.857204  | -3.697814 | -1.005066 |
| Mg18 | -3.085710 | -2.493807 | -0.944668 |
| Mg19 | 0.617822  | 2.969200  | 1.798946  |
| Mg20 | -0.251861 | -1.703474 | 0.182541  |
| Mg21 | 4.509620  | -0.270129 | 2.104765  |
| Mg22 | -4.264196 | 1.785655  | 1.987135  |
| Mg23 | -1.115067 | -5.023764 | -0.714345 |
| Mg24 | 1.542796  | 0.296398  | 2.949685  |
| Mg25 | -2.237105 | 3.948067  | 1.981616  |
| Mg26 | 2.391835  | -2.340227 | 1.718473  |
| Mg27 | -3.144794 | -1.006862 | 1.712572  |
| Mg28 | -1.475613 | 1.100922  | 3.301408  |
| Mg29 | -2.470415 | -3.954197 | 1.794597  |
| Mg30 | 0.500478  | -4.660771 | 1.767270  |
| Mg31 | -0.551050 | -1.930944 | 3.207290  |

@mg31-isomer10 bp86/6-31G(d) Etot=-6203.029869 Eb=-17.60

|     |           |           |           |
|-----|-----------|-----------|-----------|
| Mg1 | -2.709393 | 1.634132  | -2.842932 |
| Mg2 | -3.078854 | 2.804014  | 1.983363  |
| Mg3 | 1.925965  | -3.343050 | 1.765871  |
| Mg4 | 3.201873  | 1.772094  | 2.905579  |
| Mg5 | -2.149912 | -1.344013 | -3.577234 |
| Mg6 | -1.722304 | -0.103726 | 2.899698  |
| Mg7 | 2.224869  | 3.656646  | 0.608197  |

|      |           |           |           |
|------|-----------|-----------|-----------|
| Mg8  | 1.303175  | -0.634734 | 3.048760  |
| Mg9  | -0.726025 | 4.485760  | 0.904341  |
| Mg10 | -3.076406 | -2.624068 | 1.454437  |
| Mg11 | 0.126025  | 0.442024  | -2.617672 |
| Mg12 | 1.708682  | 0.623669  | 0.068407  |
| Mg13 | -4.739116 | 1.957754  | -0.588180 |
| Mg14 | -0.648454 | -2.893204 | 3.171232  |
| Mg15 | -2.100825 | -3.621656 | -1.490292 |
| Mg16 | 0.860185  | -4.660108 | -0.869647 |
| Mg17 | -0.304641 | -1.620604 | 0.116427  |
| Mg18 | 3.083842  | 2.298894  | -2.103834 |
| Mg19 | 0.561592  | -2.492032 | -2.969900 |
| Mg20 | -1.208239 | -4.995315 | 1.167269  |
| Mg21 | 4.850411  | -0.042201 | -1.309692 |
| Mg22 | 2.788784  | -2.257544 | -0.917476 |
| Mg23 | -3.519685 | -0.866564 | -0.986998 |
| Mg24 | 0.123907  | 3.335643  | -1.773869 |
| Mg25 | 4.873814  | 2.197247  | 0.574900  |
| Mg26 | -1.393086 | 1.213387  | -0.014614 |
| Mg27 | 0.207762  | 2.187109  | 2.602462  |
| Mg28 | -2.892875 | 4.104360  | -1.085036 |
| Mg29 | 2.853663  | -0.513114 | -3.429593 |
| Mg30 | 4.011884  | -0.841942 | 1.552718  |
| Mg31 | -4.436618 | 0.141140  | 1.753304  |

@mg31-isomer11 bp86/6-31G(d) Etot=-6203.028964 Eb=-17.58

|      |           |           |           |
|------|-----------|-----------|-----------|
| Mg1  | 3.821176  | -0.634815 | -1.998561 |
| Mg2  | 0.077514  | 3.177358  | -2.047358 |
| Mg3  | -0.324760 | -1.780801 | -0.197168 |
| Mg4  | 2.301843  | 3.657495  | 0.044948  |
| Mg5  | -0.911248 | -4.266145 | -2.098974 |
| Mg6  | 4.979840  | -0.446618 | 0.911239  |
| Mg7  | 2.545222  | -0.617499 | 2.845547  |
| Mg8  | -0.861799 | 4.054470  | 0.740733  |
| Mg9  | 1.002084  | 2.390615  | 2.574453  |
| Mg10 | -2.869251 | 3.866993  | -1.617975 |
| Mg11 | 4.950046  | 2.010861  | -0.721354 |
| Mg12 | -1.989159 | 1.673593  | -3.605382 |
| Mg13 | -4.320125 | 1.332880  | -1.870938 |
| Mg14 | 3.971643  | 2.055692  | 2.123119  |
| Mg15 | 1.403775  | -4.937040 | -0.279628 |
| Mg16 | -1.293207 | 1.149140  | -0.220902 |
| Mg17 | -3.862524 | 2.611272  | 1.019772  |
| Mg18 | 0.468402  | 0.047307  | -2.728608 |
| Mg19 | -3.725267 | -0.565436 | 0.331204  |
| Mg20 | 1.671830  | -2.777386 | -2.503187 |
| Mg21 | 2.772813  | 2.098418  | -2.674842 |
| Mg22 | -0.522855 | -0.141210 | 2.532764  |
| Mg23 | -3.289921 | -3.394566 | -0.550973 |
| Mg24 | 1.737746  | 0.591252  | 0.093146  |
| Mg25 | -3.521868 | 0.338045  | 3.155442  |
| Mg26 | -1.864608 | 2.755230  | 3.281722  |
| Mg27 | 2.876840  | -2.438004 | 0.332564  |
| Mg28 | 0.754562  | -3.138919 | 2.384728  |
| Mg29 | -2.366559 | -2.465015 | 2.284833  |
| Mg30 | -1.261700 | -5.079282 | 0.924916  |
| Mg31 | -2.350487 | -1.127887 | -2.465277 |

@mg31-isomer12 bp86/6-31G(d) Etot=-6203.028904 Eb=-17.58

|     |           |           |           |
|-----|-----------|-----------|-----------|
| Mg1 | 1.676914  | -2.502406 | 2.051181  |
| Mg2 | -3.590998 | -2.426591 | 0.110853  |
| Mg3 | -0.032617 | 0.402107  | -2.646999 |
| Mg4 | 4.917808  | 0.838502  | -1.452130 |
| Mg5 | -1.260428 | -4.290034 | -1.517766 |

|      |           |           |           |
|------|-----------|-----------|-----------|
| Mg6  | 3.042866  | 0.139764  | 2.810521  |
| Mg7  | 5.645573  | 0.582850  | 1.423946  |
| Mg8  | -1.134460 | 1.534093  | 0.120605  |
| Mg9  | 4.089544  | -1.711637 | 0.270259  |
| Mg10 | -2.853023 | 1.524593  | -3.275338 |
| Mg11 | -4.014336 | 2.715390  | 1.548515  |
| Mg12 | 1.859500  | -3.445754 | -0.928281 |
| Mg13 | 1.697416  | 0.372715  | 0.041891  |
| Mg14 | -3.976884 | 0.542664  | -0.665102 |
| Mg15 | -1.554344 | 4.436803  | 1.421287  |
| Mg16 | 0.903193  | 3.956039  | -0.312256 |
| Mg17 | 0.959706  | 2.656111  | 2.358875  |
| Mg18 | 2.352253  | 2.272920  | -2.421708 |
| Mg19 | -1.845190 | 2.301286  | 3.494471  |
| Mg20 | -0.625108 | -1.503070 | -0.123897 |
| Mg21 | 2.866436  | -1.023312 | -2.596007 |
| Mg22 | -1.445616 | -2.811339 | 2.574177  |
| Mg23 | -2.536120 | -1.383867 | -2.607151 |
| Mg24 | -3.037053 | -0.163025 | 2.140322  |
| Mg25 | -2.658285 | -5.121955 | 0.962880  |
| Mg26 | -3.105865 | 3.698602  | -1.177032 |
| Mg27 | -0.063365 | -0.122060 | 2.804857  |
| Mg28 | -0.526895 | 3.368589  | -2.821500 |
| Mg29 | 0.362124  | -2.549653 | -3.343879 |
| Mg30 | 0.293168  | -5.016034 | 1.130563  |
| Mg31 | 3.594083  | 2.727705  | 0.623842  |

@mg31-isomer13 bp86/6-31G(d) Etot=-6203.027110 Eb=-17.54

|      |           |           |           |
|------|-----------|-----------|-----------|
| Mg1  | -0.947839 | 2.752522  | -2.322916 |
| Mg2  | -0.372591 | 4.936817  | 0.253203  |
| Mg3  | -3.951465 | 1.755538  | -1.919785 |
| Mg4  | -2.262297 | 0.188657  | -3.671280 |
| Mg5  | -0.153625 | -0.023404 | 2.702921  |
| Mg6  | 3.660788  | -0.555516 | -2.045414 |
| Mg7  | -1.181641 | -2.438579 | -2.410824 |
| Mg8  | 2.492943  | 2.128589  | -2.924464 |
| Mg9  | 1.779806  | -2.727347 | -2.981833 |
| Mg10 | 2.639134  | 1.364434  | 2.631091  |
| Mg11 | -0.137680 | -3.038622 | 2.230455  |
| Mg12 | -1.643383 | -0.224217 | -0.159525 |
| Mg13 | 2.844380  | -3.914500 | 1.625272  |
| Mg14 | 3.765014  | 1.840519  | -0.134497 |
| Mg15 | -0.268683 | 3.022394  | 2.747611  |
| Mg16 | -2.445105 | 2.800765  | 0.453392  |
| Mg17 | 0.664681  | 1.711481  | 0.057948  |
| Mg18 | -2.342871 | -3.325120 | 0.151722  |
| Mg19 | -2.791929 | 1.407030  | 3.104664  |
| Mg20 | 2.374273  | 4.192510  | 1.555140  |
| Mg21 | -5.174034 | -2.384356 | 0.805567  |
| Mg22 | -4.550501 | 0.517447  | 0.798721  |
| Mg23 | 2.392257  | -1.541936 | 3.325038  |
| Mg24 | 0.676581  | -4.288160 | -0.552753 |
| Mg25 | -4.099832 | -1.370773 | -1.794719 |
| Mg26 | 1.278904  | -1.296198 | 0.063136  |
| Mg27 | 0.515050  | 0.016083  | -2.691089 |
| Mg28 | 3.868265  | -3.451759 | -1.047124 |
| Mg29 | -2.849821 | -1.572649 | 2.590689  |
| Mg30 | 4.249851  | -1.051686 | 0.986731  |
| Mg31 | 1.971368  | 4.570038  | -1.427078 |

@mg31-isomer14 bp86/6-31G(d) Etot=-6203.026355 Eb=-17.52

|     |           |           |          |
|-----|-----------|-----------|----------|
| Mg1 | -1.541089 | 2.365226  | 2.955992 |
| Mg2 | -2.403426 | -0.895268 | 2.887571 |
| Mg3 | 1.428734  | 2.899778  | 2.820117 |

|      |           |           |           |
|------|-----------|-----------|-----------|
| Mg4  | -0.188513 | -2.905175 | 3.061588  |
| Mg5  | 2.697900  | -1.980657 | 3.110641  |
| Mg6  | 0.508952  | 0.073877  | 2.751855  |
| Mg7  | 1.804210  | -3.926151 | 1.001128  |
| Mg8  | 3.587011  | 0.812895  | 2.300585  |
| Mg9  | -2.519014 | -3.809402 | 1.434616  |
| Mg10 | -4.116288 | 1.373161  | 1.829842  |
| Mg11 | 4.002447  | -1.759359 | 0.412451  |
| Mg12 | -0.523344 | -1.664769 | 0.167322  |
| Mg13 | -3.695540 | -1.132034 | 0.202064  |
| Mg14 | -3.200187 | -3.676640 | -1.502403 |
| Mg15 | -0.485567 | -4.664436 | -0.841703 |
| Mg16 | -1.199961 | 1.241760  | 0.119283  |
| Mg17 | -3.213948 | 4.029951  | 0.881468  |
| Mg18 | 1.756498  | 0.268200  | -0.263131 |
| Mg19 | -0.150603 | 4.271122  | 0.625698  |
| Mg20 | 2.881083  | 3.140117  | 0.211836  |
| Mg21 | 5.137663  | 1.025435  | -0.283851 |
| Mg22 | 1.838991  | -2.625381 | -1.728249 |
| Mg23 | -4.036615 | 1.685595  | -1.236425 |
| Mg24 | 4.163693  | -0.830336 | -2.473982 |
| Mg25 | -0.912684 | -2.039091 | -2.914220 |
| Mg26 | -3.752330 | -0.985773 | -2.788262 |
| Mg27 | 0.753209  | 2.717039  | -1.948513 |
| Mg28 | -2.029208 | 3.896549  | -1.810262 |
| Mg29 | 3.620885  | 2.084003  | -2.591303 |
| Mg30 | -1.522872 | 1.020497  | -3.036304 |
| Mg31 | 1.309914  | -0.010733 | -3.355449 |

@mg31-isomer15 bp86/6-31G(d) Etot=-6203.025887 Eb=-17.51

|      |           |           |           |
|------|-----------|-----------|-----------|
| Mg1  | -1.856293 | 0.526231  | 3.043749  |
| Mg2  | 0.121768  | -1.734695 | 2.661368  |
| Mg3  | -0.170063 | -2.883958 | -2.419617 |
| Mg4  | -0.062819 | 0.073506  | -2.735625 |
| Mg5  | 1.097727  | 1.065086  | 3.164013  |
| Mg6  | -3.011195 | -1.181952 | -2.716676 |
| Mg7  | -1.700448 | -0.670253 | -0.000038 |
| Mg8  | -3.085465 | 2.220156  | 0.873005  |
| Mg9  | -4.810811 | 0.596244  | -1.020151 |
| Mg10 | -0.765423 | 3.623264  | 2.303472  |
| Mg11 | 4.154224  | -0.065823 | -1.463716 |
| Mg12 | 3.095461  | -1.307403 | 3.328756  |
| Mg13 | -1.749399 | 4.402772  | -0.614888 |
| Mg14 | 3.529736  | 0.858703  | 1.313350  |
| Mg15 | 1.448193  | -1.069911 | -0.102872 |
| Mg16 | -2.689061 | -3.740242 | -0.969670 |
| Mg17 | -2.803439 | -2.608681 | 1.999012  |
| Mg18 | 2.677545  | -3.848829 | -1.170131 |
| Mg19 | 0.195386  | 1.676460  | 0.151975  |
| Mg20 | 1.000496  | 5.125068  | -0.082577 |
| Mg21 | 2.530964  | 1.272575  | -3.540622 |
| Mg22 | 2.449497  | -3.828768 | 1.938093  |
| Mg23 | -4.599432 | -0.158001 | 1.970650  |
| Mg24 | -0.116298 | -3.815580 | 0.484446  |
| Mg25 | -2.398543 | 1.886795  | -2.188890 |
| Mg26 | 4.482900  | -2.114143 | 0.699567  |
| Mg27 | 0.302334  | 3.215576  | -2.548374 |
| Mg28 | 2.959254  | 2.830206  | -0.954108 |
| Mg29 | 2.476581  | -1.764627 | -3.268569 |
| Mg30 | -5.025949 | -2.185614 | -0.182280 |
| Mg31 | 2.322572  | 3.605839  | 2.047348  |

@mg31-isomer16 bp86/6-31G(d) Etot=-6203.025884 Eb=-17.51

|     |          |          |           |
|-----|----------|----------|-----------|
| Mg1 | 0.150710 | 1.774335 | -0.047665 |
|-----|----------|----------|-----------|

|      |           |           |           |
|------|-----------|-----------|-----------|
| Mg2  | 1.915738  | 0.158379  | 3.072361  |
| Mg3  | -2.267212 | 1.609586  | -2.519387 |
| Mg4  | -2.057132 | 4.133539  | -0.993444 |
| Mg5  | -3.438935 | -3.024707 | -1.130387 |
| Mg6  | -1.620856 | -0.746615 | -0.089026 |
| Mg7  | -0.822033 | 1.304196  | 2.862142  |
| Mg8  | 3.458720  | 1.456036  | 0.833991  |
| Mg9  | 4.325300  | -3.260428 | -0.151527 |
| Mg10 | 1.426266  | -1.010233 | 0.045209  |
| Mg11 | -2.558456 | -1.252355 | -3.518297 |
| Mg12 | 4.785015  | -0.515816 | -1.015960 |
| Mg13 | 1.580658  | 3.374505  | 2.257535  |
| Mg14 | 2.764714  | 1.300509  | -2.237986 |
| Mg15 | -0.521716 | -1.677688 | 2.793295  |
| Mg16 | 2.826404  | 3.906126  | -0.683228 |
| Mg17 | -3.239350 | 1.683292  | 0.650276  |
| Mg18 | 4.373173  | -1.210347 | 1.993840  |
| Mg19 | -0.469293 | -2.910647 | -2.346784 |
| Mg20 | 0.491605  | 5.380441  | 0.054922  |
| Mg21 | 2.080832  | -3.198587 | 2.052252  |
| Mg22 | -3.262853 | -0.286219 | 3.221415  |
| Mg23 | -4.535586 | -0.127913 | -1.739439 |
| Mg24 | -4.932502 | -1.099680 | 0.950430  |
| Mg25 | 0.162163  | 0.002924  | -2.861341 |
| Mg26 | 2.651571  | -1.910318 | -2.642688 |
| Mg27 | -1.435894 | 4.041979  | 1.926299  |
| Mg28 | -3.205162 | -3.113919 | 2.172008  |
| Mg29 | 0.489318  | 3.302318  | -2.606802 |
| Mg30 | -0.817279 | -3.750952 | 0.576718  |
| Mg31 | 1.702074  | -4.331744 | -0.878732 |

@mg31-isomer17 bp86/6-31G(d) Etot=-6203.025806 Eb=-17.51

|      |           |           |           |
|------|-----------|-----------|-----------|
| Mg1  | -4.304539 | -2.861367 | 0.580453  |
| Mg2  | -4.948137 | -0.113691 | 1.139899  |
| Mg3  | -4.211557 | -0.625606 | -1.813704 |
| Mg4  | -2.775861 | -3.480927 | -1.816470 |
| Mg5  | -3.215732 | 1.932246  | -0.163085 |
| Mg6  | -2.634340 | -1.399310 | 2.750379  |
| Mg7  | -1.873468 | -1.383414 | -3.597850 |
| Mg8  | -3.299323 | 1.640999  | 2.929099  |
| Mg9  | -1.500415 | -0.751764 | -0.194778 |
| Mg10 | -1.941368 | 1.571957  | -2.869521 |
| Mg11 | -1.389232 | -3.645196 | 0.932741  |
| Mg12 | -1.734100 | 4.263914  | -1.504837 |
| Mg13 | -1.389652 | 3.668826  | 1.655234  |
| Mg14 | 0.644645  | 5.183658  | 0.002250  |
| Mg15 | 0.944920  | 3.188010  | -2.687640 |
| Mg16 | 0.598918  | 0.024560  | -2.863005 |
| Mg17 | 0.240048  | 1.726950  | -0.213262 |
| Mg18 | -0.439074 | 0.771736  | 2.585785  |
| Mg19 | 0.356957  | -2.964848 | -1.691529 |
| Mg20 | 0.415755  | -2.044523 | 2.964541  |
| Mg21 | 1.599652  | -0.924026 | 0.194233  |
| Mg22 | 1.708311  | 3.014952  | 2.289091  |
| Mg23 | 2.359147  | 0.277691  | 3.558125  |
| Mg24 | 3.074019  | 3.640876  | -0.426501 |
| Mg25 | 3.195562  | 1.086945  | -1.887396 |
| Mg26 | 1.530759  | -4.157984 | 1.202871  |
| Mg27 | 3.001929  | -1.782516 | -2.952039 |
| Mg28 | 3.860884  | 1.118932  | 1.164093  |
| Mg29 | 3.747160  | -2.105908 | 2.093916  |
| Mg30 | 3.540514  | -3.737493 | -0.792679 |
| Mg31 | 4.837618  | -1.133680 | -0.568415 |

@mg31-isomer18 bp86/6-31G(d) Etot=-6203.025239 Eb=-17.50

|      |           |           |           |
|------|-----------|-----------|-----------|
| Mg1  | 3.044179  | -0.694871 | 3.242480  |
| Mg2  | 0.822262  | 3.983926  | 2.383177  |
| Mg3  | 3.016927  | 2.066278  | 1.731837  |
| Mg4  | 0.496381  | 0.915119  | 3.140038  |
| Mg5  | 4.962733  | -0.264625 | 1.104395  |
| Mg6  | -1.909617 | 2.543138  | 2.542876  |
| Mg7  | 3.585787  | 1.328599  | -1.109566 |
| Mg8  | 1.921768  | 4.132579  | -0.562178 |
| Mg9  | -1.117085 | 4.827819  | 0.360143  |
| Mg10 | 4.666275  | -1.660133 | -1.437344 |
| Mg11 | -2.128578 | -0.693954 | 3.297131  |
| Mg12 | 3.392471  | -3.026741 | 1.145399  |
| Mg13 | -4.218431 | 0.726071  | 1.751790  |
| Mg14 | 0.206416  | 1.731476  | 0.075672  |
| Mg15 | 1.637809  | -0.853390 | -0.055428 |
| Mg16 | 0.494161  | -2.085446 | 2.602940  |
| Mg17 | 1.767630  | 2.367185  | -3.140629 |
| Mg18 | -2.932783 | 2.329796  | -0.384829 |
| Mg19 | -1.495227 | -0.794529 | 0.180924  |
| Mg20 | 2.324814  | -0.718485 | -3.164098 |
| Mg21 | -2.051766 | -3.590106 | 2.084378  |
| Mg22 | -0.905093 | 3.451407  | -2.318942 |
| Mg23 | -4.524842 | -2.237706 | 1.524028  |
| Mg24 | 2.592300  | -3.658601 | -1.747471 |
| Mg25 | -0.442397 | 0.382996  | -2.709452 |
| Mg26 | -4.412852 | -0.499008 | -0.985794 |
| Mg27 | 0.288226  | -3.896511 | 0.203839  |
| Mg28 | -3.228433 | 1.465301  | -3.220344 |
| Mg29 | -0.130163 | -2.568718 | -2.455841 |
| Mg30 | -2.904656 | -3.445227 | -0.858279 |
| Mg31 | -2.818218 | -1.563638 | -3.220851 |

@mg31-isomer19 bp86/6-31G(d) Etot=-6203.025066 Eb=-17.50

|      |           |           |           |
|------|-----------|-----------|-----------|
| Mg1  | -2.128541 | 1.097449  | -3.800338 |
| Mg2  | -3.023765 | -1.655541 | -2.657779 |
| Mg3  | -0.060421 | -0.726823 | -2.761977 |
| Mg4  | 1.978785  | -2.951651 | -2.816525 |
| Mg5  | -0.631315 | -3.525633 | -1.523495 |
| Mg6  | -4.940435 | -1.281034 | -0.275956 |
| Mg7  | -3.489707 | 1.275077  | -1.145614 |
| Mg8  | -3.382975 | -3.775525 | -0.416494 |
| Mg9  | 2.953803  | -0.041250 | -2.853232 |
| Mg10 | 0.672387  | 2.198678  | -3.131218 |
| Mg11 | -1.863008 | 3.635688  | -2.135056 |
| Mg12 | 1.947109  | -3.629950 | 0.280357  |
| Mg13 | -0.841451 | -3.485737 | 1.637041  |
| Mg14 | -1.617271 | -0.996399 | 0.077749  |
| Mg15 | -0.368124 | 1.664521  | -0.048653 |
| Mg16 | 1.614250  | -0.526041 | 0.099405  |
| Mg17 | -3.688136 | -2.417240 | 2.249810  |
| Mg18 | -2.590665 | 3.708568  | 0.803960  |
| Mg19 | 4.432076  | -2.324680 | -1.285627 |
| Mg20 | -3.691067 | 0.655344  | 1.779361  |
| Mg21 | 3.208998  | 2.729390  | -1.763909 |
| Mg22 | 0.838798  | 4.414930  | -0.816228 |
| Mg23 | -1.331692 | -0.822087 | 3.297554  |
| Mg24 | 0.207742  | 4.137002  | 2.147141  |
| Mg25 | 1.528375  | -1.954999 | 2.971068  |
| Mg26 | 4.309628  | -2.221868 | 1.644301  |
| Mg27 | -1.806153 | 2.260909  | 3.385957  |
| Mg28 | 2.629816  | 2.621056  | 1.145495  |
| Mg29 | 0.871743  | 1.117501  | 3.065433  |
| Mg30 | 3.752281  | 0.355625  | 2.928200  |



|                                                          |           |           |           |
|----------------------------------------------------------|-----------|-----------|-----------|
| Mg31                                                     | 4.508934  | 0.464723  | -0.080730 |
| @mg31-isomer20 bp86/6-31G(d) Etot=-6203.024455 Eb=-17.49 |           |           |           |
| Mg1                                                      | 0.080378  | 2.893311  | 2.124930  |
| Mg2                                                      | -0.021002 | -1.687718 | 0.099111  |
| Mg3                                                      | -3.944432 | -0.962601 | 0.641930  |
| Mg4                                                      | 0.414978  | 0.111034  | 2.957870  |
| Mg5                                                      | 2.514146  | -2.538200 | -2.544509 |
| Mg6                                                      | 2.441699  | 3.781814  | 0.128094  |
| Mg7                                                      | -0.438684 | -3.326667 | -2.548204 |
| Mg8                                                      | -0.539184 | -4.628099 | 1.822834  |
| Mg9                                                      | -2.644576 | 0.903604  | 2.928292  |
| Mg10                                                     | -0.534625 | 3.777117  | -0.748647 |
| Mg11                                                     | -1.833900 | -2.037296 | 2.629144  |
| Mg12                                                     | -4.911126 | 1.837083  | 1.000152  |
| Mg13                                                     | -4.559204 | 0.839779  | -1.846665 |
| Mg14                                                     | 1.843028  | -4.236348 | -0.098517 |
| Mg15                                                     | 3.420309  | -1.555090 | 0.195505  |
| Mg16                                                     | -2.728175 | 3.723713  | 1.601002  |
| Mg17                                                     | -3.605973 | 3.522822  | -1.238903 |
| Mg18                                                     | 4.555568  | 1.383775  | 0.530503  |
| Mg19                                                     | -1.598046 | 0.957378  | 0.029447  |
| Mg20                                                     | 1.444051  | 2.554572  | -2.720876 |
| Mg21                                                     | 1.659141  | -2.570252 | 2.570301  |
| Mg22                                                     | -2.520624 | -1.219417 | -2.248305 |
| Mg23                                                     | -0.663822 | -5.792372 | -0.899955 |
| Mg24                                                     | 3.583813  | -0.345695 | 3.002475  |
| Mg25                                                     | 3.588147  | 0.220670  | -2.375120 |
| Mg26                                                     | 2.963007  | 2.481276  | 2.875530  |
| Mg27                                                     | 0.460498  | -0.307828 | -2.697641 |
| Mg28                                                     | 4.420552  | 3.012663  | -2.058179 |
| Mg29                                                     | -1.716125 | 1.809905  | -2.957547 |
| Mg30                                                     | 1.479051  | 0.907860  | 0.071391  |
| Mg31                                                     | -2.608868 | -3.510790 | -0.225444 |
| @mg31-isomer21 bp86/6-31G(d) Etot=-6203.024211 Eb=-17.48 |           |           |           |
| Mg1                                                      | 1.576481  | 1.985225  | 2.531172  |
| Mg2                                                      | -1.165249 | 0.942316  | 3.149511  |
| Mg3                                                      | -0.847789 | 4.016605  | 2.012450  |
| Mg4                                                      | -1.572699 | -2.090635 | 3.196423  |
| Mg5                                                      | 4.080025  | 0.029111  | 2.613678  |
| Mg6                                                      | 1.195893  | -0.982209 | 3.131235  |
| Mg7                                                      | 3.422515  | -2.753485 | 1.959890  |
| Mg8                                                      | 0.537268  | -3.616577 | 1.670986  |
| Mg9                                                      | -3.600560 | -0.408750 | 1.978682  |
| Mg10                                                     | 4.034435  | 2.015149  | 0.421813  |
| Mg11                                                     | -3.516663 | 2.681142  | 2.159744  |
| Mg12                                                     | 1.697593  | 4.049002  | 0.377243  |
| Mg13                                                     | -2.591155 | -3.957714 | 0.940216  |
| Mg14                                                     | -0.891580 | 1.608413  | 0.101494  |
| Mg15                                                     | -2.920231 | 4.180977  | -0.328250 |
| Mg16                                                     | 4.619354  | -1.090210 | -0.304363 |
| Mg17                                                     | -1.090426 | -1.359417 | 0.022093  |
| Mg18                                                     | 1.641674  | -0.066679 | 0.073415  |
| Mg19                                                     | 2.199302  | -2.973656 | -0.869935 |
| Mg20                                                     | 5.114391  | 1.022954  | -2.356533 |
| Mg21                                                     | -4.364946 | -1.870480 | -0.540486 |
| Mg22                                                     | -0.247738 | -4.787342 | -1.015316 |
| Mg23                                                     | 2.334571  | 2.305469  | -2.058292 |
| Mg24                                                     | -0.297140 | 3.930725  | -1.868557 |
| Mg25                                                     | -3.991236 | 1.190889  | -0.515049 |
| Mg26                                                     | -2.698262 | -3.620824 | -2.184930 |
| Mg27                                                     | 2.675166  | -0.721640 | -2.895969 |
| Mg28                                                     | -0.035995 | 0.774739  | -2.876727 |

|      |           |           |           |
|------|-----------|-----------|-----------|
| Mg29 | 0.003828  | -2.248386 | -2.880280 |
| Mg30 | -2.644504 | 2.446183  | -2.871072 |
| Mg31 | -2.656322 | -0.630892 | -2.774288 |

@mg31-isomer22 bp86/6-31G(d) Etot=-6203.024195 Eb=-17.48

|      |           |           |           |
|------|-----------|-----------|-----------|
| Mg1  | -2.186710 | -2.669156 | -2.771970 |
| Mg2  | -3.400043 | -2.110321 | 2.056237  |
| Mg3  | 2.570547  | 2.215233  | 1.744895  |
| Mg4  | 2.176029  | -0.028121 | 3.656306  |
| Mg5  | -1.117323 | 0.408568  | -2.989820 |
| Mg6  | -2.923963 | 0.750902  | 3.285969  |
| Mg7  | 1.987405  | -2.795394 | 2.113082  |
| Mg8  | -0.113858 | 1.946726  | 3.254322  |
| Mg9  | -0.904185 | -3.898818 | 2.269424  |
| Mg10 | -3.042951 | 2.677415  | -1.576291 |
| Mg11 | 0.897904  | -1.843060 | -2.709721 |
| Mg12 | 1.665170  | -0.448558 | 0.040545  |
| Mg13 | -4.532502 | -2.301820 | -0.779694 |
| Mg14 | -2.574111 | 3.251559  | 1.605127  |
| Mg15 | -0.343842 | 3.344494  | -2.830845 |
| Mg16 | 1.958238  | 3.663997  | -0.884512 |
| Mg17 | -0.449092 | 1.637354  | 0.061174  |
| Mg18 | 3.339623  | -2.967825 | -0.643895 |
| Mg19 | 1.744242  | 1.233242  | -2.775887 |
| Mg20 | -1.354536 | 5.043704  | -0.601425 |
| Mg21 | 5.810266  | -1.253048 | -0.761621 |
| Mg22 | 4.097871  | 1.337566  | -0.743189 |
| Mg23 | -4.024065 | -0.101127 | -2.653683 |
| Mg24 | 0.421068  | -3.865485 | -0.517032 |
| Mg25 | 4.300786  | -0.662924 | 1.704517  |
| Mg26 | -1.327374 | -1.283893 | -0.285625 |
| Mg27 | -0.487515 | -0.955804 | 2.649694  |
| Mg28 | -2.611098 | -4.360788 | -0.137884 |
| Mg29 | 3.788546  | -0.925628 | -2.849409 |
| Mg30 | -3.787325 | 0.529356  | 0.413232  |
| Mg31 | 0.422801  | 4.431653  | 1.657980  |

@mg31-isomer23 bp86/6-31G(d) Etot=-6203.023971 Eb=-17.48

|      |           |           |           |
|------|-----------|-----------|-----------|
| Mg1  | 1.112433  | 3.299599  | -1.090654 |
| Mg2  | -0.179603 | -0.994277 | -2.853022 |
| Mg3  | 2.760237  | 2.946440  | 1.510787  |
| Mg4  | -1.334125 | -3.490237 | 2.247670  |
| Mg5  | 0.490421  | 1.049248  | 2.410131  |
| Mg6  | 1.937065  | 0.357738  | -0.129691 |
| Mg7  | 4.031427  | 2.631543  | -1.286632 |
| Mg8  | -2.409668 | -3.129849 | -2.721089 |
| Mg9  | 3.388923  | 0.269439  | 3.035515  |
| Mg10 | 3.871910  | -1.845058 | 0.804161  |
| Mg11 | -3.812257 | 2.645586  | -1.978310 |
| Mg12 | -0.929369 | 1.985586  | -3.150157 |
| Mg13 | -3.503566 | -1.222520 | 2.646300  |
| Mg14 | -0.965483 | -0.918315 | 4.008044  |
| Mg15 | -1.237372 | 1.348687  | -0.194138 |
| Mg16 | 4.747358  | -0.203220 | -1.802489 |
| Mg17 | -1.663877 | 4.469003  | -1.195172 |
| Mg18 | -1.606609 | -4.927993 | -0.331767 |
| Mg19 | -3.474635 | -2.366625 | -0.076094 |
| Mg20 | -3.133057 | -0.228826 | -2.436829 |
| Mg21 | -0.500428 | 3.897594  | 1.602705  |
| Mg22 | 0.372173  | -4.074709 | -2.396344 |
| Mg23 | -0.450032 | -1.438263 | 0.257457  |
| Mg24 | 1.504595  | -2.053594 | 2.760087  |
| Mg25 | -3.589485 | 3.685700  | 0.927234  |
| Mg26 | -4.198704 | 0.696871  | 0.365237  |

|      |           |           |           |
|------|-----------|-----------|-----------|
| Mg27 | -2.466462 | 1.672048  | 2.814098  |
| Mg28 | 2.526849  | -2.138105 | -1.963146 |
| Mg29 | 5.219733  | 1.011988  | 0.896099  |
| Mg30 | 2.075877  | 1.019092  | -3.131650 |
| Mg31 | 1.415731  | -3.954569 | 0.451660  |

@mg31-isomer24 bp86/6-31G(d) Etot=-6203.023933 Eb=-17.48

|      |           |           |           |
|------|-----------|-----------|-----------|
| Mg1  | 1.642118  | -4.451318 | 1.197568  |
| Mg2  | 4.165207  | -3.165109 | 0.478883  |
| Mg3  | 2.063023  | -3.645619 | -1.817318 |
| Mg4  | -4.154812 | 0.940340  | 1.443669  |
| Mg5  | 1.821391  | -0.093371 | -2.930330 |
| Mg6  | -3.407394 | -3.007021 | -1.838254 |
| Mg7  | -1.691356 | 2.778208  | 0.717461  |
| Mg8  | -3.568410 | -2.616448 | 1.144875  |
| Mg9  | 3.862964  | -0.012358 | 0.637201  |
| Mg10 | -1.256545 | 4.154096  | -1.996158 |
| Mg11 | 1.155501  | -1.471875 | -0.033218 |
| Mg12 | -0.595920 | -2.662131 | 2.394104  |
| Mg13 | 0.767177  | 5.010432  | 0.063101  |
| Mg14 | -3.269566 | -0.436254 | -3.274149 |
| Mg15 | 3.222038  | 3.193746  | 0.620424  |
| Mg16 | -3.555903 | 1.917334  | -1.461158 |
| Mg17 | 0.901931  | 1.426915  | -0.163705 |
| Mg18 | 2.832207  | 1.286491  | 3.115775  |
| Mg19 | 1.679036  | 3.321608  | -2.388032 |
| Mg20 | 4.080261  | 1.601982  | -1.886899 |
| Mg21 | -5.073865 | -0.719374 | -0.886525 |
| Mg22 | 2.471874  | -1.825744 | 2.737873  |
| Mg23 | 4.232874  | -1.535540 | -2.003352 |
| Mg24 | 0.683511  | 3.260441  | 2.522884  |
| Mg25 | -0.600845 | -1.831842 | -2.652844 |
| Mg26 | -2.205871 | 2.106717  | 3.556927  |
| Mg27 | 0.016561  | 0.240091  | 2.561814  |
| Mg28 | -1.734148 | -0.392820 | -0.078813 |
| Mg29 | -0.930514 | -3.826194 | -0.377873 |
| Mg30 | -2.741473 | -0.831961 | 3.402303  |
| Mg31 | -0.811054 | 1.286579  | -2.806235 |

@mg31-isomer25 bp86/6-31G(d) Etot=-6203.022486 Eb=-17.45

|      |           |           |           |
|------|-----------|-----------|-----------|
| Mg1  | 1.633721  | 2.981096  | -2.097725 |
| Mg2  | -1.691446 | -0.672807 | -0.491997 |
| Mg3  | 0.000186  | -1.281268 | 1.896844  |
| Mg4  | 2.582623  | 3.955439  | 0.648788  |
| Mg5  | 1.691572  | -0.672813 | -0.492170 |
| Mg6  | -0.000456 | 3.737979  | 2.418478  |
| Mg7  | 0.000167  | 1.628721  | 0.258567  |
| Mg8  | 1.548817  | -2.209173 | -3.020852 |
| Mg9  | 3.976933  | 1.470803  | -0.522180 |
| Mg10 | -2.607075 | 1.353247  | 2.178046  |
| Mg11 | 0.000221  | -3.492419 | -0.568470 |
| Mg12 | 4.693633  | -1.303373 | -1.764135 |
| Mg13 | -4.175607 | -1.353176 | 1.270694  |
| Mg14 | 3.132354  | -3.591382 | -0.747902 |
| Mg15 | -0.000442 | 5.038521  | -0.361847 |
| Mg16 | -3.131827 | -3.591863 | -0.747682 |
| Mg17 | 2.607161  | 1.353616  | 2.178238  |
| Mg18 | -1.926834 | -3.593736 | 1.918184  |
| Mg19 | -4.693428 | -1.304162 | -1.764015 |
| Mg20 | -2.394196 | -1.221142 | 3.719416  |
| Mg21 | -0.000069 | 0.513157  | -2.985723 |
| Mg22 | -3.977410 | 1.470160  | -0.522122 |
| Mg23 | 2.394550  | -1.220893 | 3.719413  |
| Mg24 | -3.020931 | 0.614223  | -3.282518 |

|      |           |           |           |
|------|-----------|-----------|-----------|
| Mg25 | 0.000029  | 0.996214  | 3.726065  |
| Mg26 | -1.548668 | -2.209349 | -3.020662 |
| Mg27 | 1.927478  | -3.593484 | 1.918025  |
| Mg28 | 3.020738  | 0.614703  | -3.282561 |
| Mg29 | -1.634192 | 2.980638  | -2.097512 |
| Mg30 | -2.583439 | 3.955100  | 0.648739  |
| Mg31 | 4.175836  | -1.352576 | 1.270574  |

@mg31-isomer26 bp86/6-31G(d) Etot=-6203.020354 Eb=-17.40

|      |           |           |           |
|------|-----------|-----------|-----------|
| Mg1  | -3.843034 | 1.268011  | 2.145486  |
| Mg2  | -3.624714 | -1.785871 | 2.280917  |
| Mg3  | -1.254541 | 0.568719  | 3.424484  |
| Mg4  | -1.853963 | 3.539071  | 1.821170  |
| Mg5  | 0.824331  | 2.985295  | 3.378853  |
| Mg6  | -4.067558 | -2.854018 | -0.789526 |
| Mg7  | -4.971777 | -0.208896 | -0.188403 |
| Mg8  | 1.709329  | 4.295778  | 0.397067  |
| Mg9  | -2.975552 | 2.071188  | -0.695285 |
| Mg10 | 1.740570  | -0.019386 | 3.245287  |
| Mg11 | -0.327080 | -2.270299 | 2.816877  |
| Mg12 | -1.002738 | 4.357782  | -1.036741 |
| Mg13 | -1.692206 | -0.683974 | 0.319930  |
| Mg14 | 0.265418  | 1.640482  | 0.779766  |
| Mg15 | -2.038618 | -3.987538 | 0.988644  |
| Mg16 | 3.373160  | 2.338217  | 2.089583  |
| Mg17 | 2.689382  | -2.854453 | 2.543947  |
| Mg18 | 1.490102  | -0.997150 | 0.144727  |
| Mg19 | -0.143016 | 0.621608  | -1.879538 |
| Mg20 | 0.924161  | -4.032013 | 0.302431  |
| Mg21 | -3.080923 | -0.491599 | -2.610976 |
| Mg22 | 1.317442  | 3.303856  | -2.596585 |
| Mg23 | -1.177255 | -2.984917 | -1.846858 |
| Mg24 | 3.250500  | 1.729080  | -0.856141 |
| Mg25 | 4.264781  | -0.505931 | 1.300758  |
| Mg26 | -1.729088 | 2.476791  | -3.450659 |
| Mg27 | 3.888106  | -3.300151 | -0.087227 |
| Mg28 | 1.833397  | -2.588524 | -2.492912 |
| Mg29 | 2.293465  | 0.469348  | -3.519670 |
| Mg30 | -0.403065 | -1.149721 | -4.129379 |
| Mg31 | 4.320983  | -0.950784 | -1.800026 |

@mg31-isomer27 bp86/6-31G(d) Etot=-6203.018991 Eb=-17.38

|      |           |           |           |
|------|-----------|-----------|-----------|
| Mg1  | -3.567851 | 0.195263  | -2.964228 |
| Mg2  | -2.091532 | 2.810837  | -2.453725 |
| Mg3  | -4.564486 | 1.971263  | -0.804972 |
| Mg4  | -0.612760 | -0.260480 | -2.806735 |
| Mg5  | 0.966071  | 2.201798  | -2.405683 |
| Mg6  | -2.535773 | -2.580634 | -2.246454 |
| Mg7  | -3.616798 | -0.821956 | 0.041077  |
| Mg8  | 2.394222  | -0.573743 | -3.013251 |
| Mg9  | -3.091982 | 4.233840  | 0.284026  |
| Mg10 | 3.953894  | 2.088951  | -3.181460 |
| Mg11 | 0.516543  | -3.139122 | -2.567382 |
| Mg12 | -1.277703 | 1.299955  | -0.034345 |
| Mg13 | 0.010752  | 4.108158  | -0.166467 |
| Mg14 | -1.576707 | -5.243712 | -1.466916 |
| Mg15 | -3.697502 | 1.619267  | 2.072337  |
| Mg16 | 3.095962  | 3.243994  | -0.471196 |
| Mg17 | 1.724019  | 0.426336  | 0.028904  |
| Mg18 | -2.578041 | -3.666520 | 0.949613  |
| Mg19 | -0.440891 | -1.563086 | 0.096541  |
| Mg20 | 4.687174  | 0.298327  | -1.021027 |
| Mg21 | 2.804362  | -2.432143 | -0.666823 |
| Mg22 | 0.522008  | -4.532583 | 0.434169  |

|      |           |           |          |
|------|-----------|-----------|----------|
| Mg23 | -1.409742 | 3.594867  | 2.576841 |
| Mg24 | -3.173299 | -1.332084 | 2.953889 |
| Mg25 | -0.817211 | 0.596757  | 2.887913 |
| Mg26 | 2.444913  | -3.119352 | 2.275224 |
| Mg27 | -0.415068 | -2.438971 | 3.008030 |
| Mg28 | 1.434757  | 2.679033  | 2.194096 |
| Mg29 | 4.520684  | -1.157016 | 1.563821 |
| Mg30 | 2.037886  | -0.272446 | 3.113067 |
| Mg31 | 4.354097  | 1.765202  | 1.791116 |

@mg31-isomer28 bp86/6-31G(d) Etot=-6203.017712 Eb=-17.35

|      |           |           |           |
|------|-----------|-----------|-----------|
| Mg1  | 5.492514  | 2.241847  | 0.267431  |
| Mg2  | 3.264776  | 2.069105  | -1.950383 |
| Mg3  | 0.732797  | 3.661748  | -1.081011 |
| Mg4  | 2.793244  | 3.041768  | 1.145939  |
| Mg5  | -1.691209 | 3.230486  | -2.885641 |
| Mg6  | 0.462965  | 1.127565  | -2.966854 |
| Mg7  | -2.187306 | 4.380203  | -0.119872 |
| Mg8  | 4.967287  | -0.313220 | -1.056903 |
| Mg9  | -0.233545 | 3.070211  | 1.814230  |
| Mg10 | 2.521190  | -1.086152 | -2.709196 |
| Mg11 | 4.106673  | 0.081070  | 1.945197  |
| Mg12 | 1.662428  | 0.403870  | 0.067311  |
| Mg13 | -4.188181 | 2.500999  | -1.419616 |
| Mg14 | -1.308950 | 1.221507  | -0.396392 |
| Mg15 | 1.590935  | 1.158889  | 3.409623  |
| Mg16 | -0.353055 | -1.759820 | -3.575987 |
| Mg17 | -2.609577 | 0.273828  | -3.063912 |
| Mg18 | -3.578735 | 2.312639  | 1.638194  |
| Mg19 | 3.199123  | -2.387272 | 0.037910  |
| Mg20 | -1.794762 | 1.665448  | 3.979513  |
| Mg21 | -0.418181 | -1.707492 | -0.491579 |
| Mg22 | -0.670137 | -0.328111 | 2.184393  |
| Mg23 | 1.799189  | -1.920323 | 2.708570  |
| Mg24 | 1.320403  | -3.853813 | -1.971021 |
| Mg25 | -2.916458 | -2.628519 | -2.164581 |
| Mg26 | 1.305893  | -4.482629 | 1.075529  |
| Mg27 | -3.545907 | -0.636334 | 2.793043  |
| Mg28 | -3.972517 | -0.301253 | -0.290745 |
| Mg29 | -1.026591 | -3.278970 | 2.567174  |
| Mg30 | -1.315470 | -4.757125 | -0.356671 |
| Mg31 | -3.408836 | -3.000150 | 0.866305  |

@mg31-isomer29 bp86/6-31G(d) Etot=-6203.017494 Eb=-17.35

|      |           |           |           |
|------|-----------|-----------|-----------|
| Mg1  | 1.600474  | -2.597506 | -3.130829 |
| Mg2  | 2.318722  | 1.407040  | 3.202467  |
| Mg3  | -2.179275 | -4.672702 | -0.244831 |
| Mg4  | -3.556785 | 2.362256  | 2.354214  |
| Mg5  | 4.508331  | 1.882888  | 1.415273  |
| Mg6  | 1.064022  | 2.559512  | -2.389817 |
| Mg7  | 2.245513  | -3.467636 | 2.025336  |
| Mg8  | -0.564846 | 1.972246  | 2.987617  |
| Mg9  | -3.642394 | 3.100882  | -0.706738 |
| Mg10 | -3.621235 | -2.781894 | 1.671024  |
| Mg11 | -1.853689 | 2.631040  | -3.157099 |
| Mg12 | -0.094852 | -0.056440 | -2.847890 |
| Mg13 | -1.706436 | 4.460023  | 1.505914  |
| Mg14 | -0.775589 | -3.610772 | 2.290247  |
| Mg15 | -1.403583 | -2.806752 | -2.700624 |
| Mg16 | 3.950481  | -0.986552 | 2.064494  |
| Mg17 | -1.075247 | 1.558723  | -0.075842 |
| Mg18 | -0.857507 | 4.687267  | -1.226176 |
| Mg19 | -3.107260 | 0.095428  | -2.495169 |
| Mg20 | 0.664687  | -0.971169 | 2.765782  |

|      |           |           |           |
|------|-----------|-----------|-----------|
| Mg21 | -2.294936 | -0.452154 | 2.959282  |
| Mg22 | 3.798552  | 2.467452  | -1.342647 |
| Mg23 | 0.745275  | -4.027466 | -0.597478 |
| Mg24 | 3.298492  | -2.413414 | -0.647520 |
| Mg25 | -0.974818 | -1.387745 | 0.036478  |
| Mg26 | -3.997490 | -2.438762 | -1.323778 |
| Mg27 | 5.225567  | -0.147232 | -0.697804 |
| Mg28 | 1.374346  | 3.276714  | 0.736927  |
| Mg29 | 1.753014  | 0.231300  | 0.024872  |
| Mg30 | -3.896778 | 0.111093  | 0.422057  |
| Mg31 | 3.055242  | 0.014333  | -2.877744 |

@mg31-isomer30 bp86/6-31G(d) Etot=-6203.014932 Eb=-17.29

|      |           |           |           |
|------|-----------|-----------|-----------|
| Mg1  | -1.927648 | 1.457490  | 3.089578  |
| Mg2  | 1.205361  | 1.701821  | 3.419492  |
| Mg3  | -2.830149 | -1.655422 | 2.415275  |
| Mg4  | 0.085537  | -0.865391 | 2.508742  |
| Mg5  | -0.006144 | 3.914131  | 1.760320  |
| Mg6  | -4.076691 | 0.865555  | 1.009096  |
| Mg7  | -4.325279 | -1.987856 | -0.092309 |
| Mg8  | -3.103172 | 3.783973  | 1.506818  |
| Mg9  | 1.973792  | -3.056715 | 3.517377  |
| Mg10 | -3.853749 | 3.011770  | -1.300037 |
| Mg11 | -1.173520 | 1.482952  | 0.094404  |
| Mg12 | -2.842375 | -4.557172 | 0.178784  |
| Mg13 | -1.481752 | 4.743948  | -0.822880 |
| Mg14 | -3.300417 | 0.121457  | -1.960841 |
| Mg15 | -1.015615 | -1.537363 | -0.317602 |
| Mg16 | -0.593372 | -3.847243 | 1.946914  |
| Mg17 | 2.958820  | 2.717528  | 1.316618  |
| Mg18 | 3.236635  | -0.501520 | 2.428916  |
| Mg19 | -2.635445 | -3.058060 | -2.479847 |
| Mg20 | 1.167887  | 3.237473  | -1.113534 |
| Mg21 | 1.558285  | 0.212407  | -0.148988 |
| Mg22 | -1.274219 | 2.301106  | -2.911449 |
| Mg23 | 1.998083  | -2.983682 | 0.505450  |
| Mg24 | 5.428647  | 0.927151  | 1.073935  |
| Mg25 | -0.793352 | -0.754468 | -3.397932 |
| Mg26 | -0.159973 | -4.461659 | -1.222032 |
| Mg27 | 3.951759  | 1.778160  | -1.461080 |
| Mg28 | 4.314506  | -1.371545 | -0.528805 |
| Mg29 | 1.558985  | 0.998291  | -3.267268 |
| Mg30 | 1.741947  | -2.094926 | -2.356733 |
| Mg31 | 4.212631  | -0.522189 | -3.390383 |

@mg31-isomer31 bp86/6-31G(d) Etot=-6202.998982 Eb=-16.97

|      |           |           |           |
|------|-----------|-----------|-----------|
| Mg1  | 0.756230  | 2.712569  | 2.389683  |
| Mg2  | 3.866938  | 2.059187  | 1.695073  |
| Mg3  | 4.440881  | 2.324837  | -1.394148 |
| Mg4  | 0.013441  | 1.071999  | 0.001713  |
| Mg5  | 2.114570  | 3.770448  | -0.095889 |
| Mg6  | -1.164225 | 0.271870  | 2.812339  |
| Mg7  | 2.685323  | -0.180141 | -0.107791 |
| Mg8  | -2.644144 | 2.676815  | 1.597468  |
| Mg9  | -2.537449 | -1.187559 | -3.165979 |
| Mg10 | 1.682256  | 1.950637  | -2.497260 |
| Mg11 | -0.112857 | -1.916721 | 0.334663  |
| Mg12 | 0.541757  | -0.784155 | -2.612432 |
| Mg13 | -1.407058 | 1.531614  | -2.806359 |
| Mg14 | 1.919835  | -0.085007 | 2.878676  |
| Mg15 | -3.712919 | 2.700322  | -1.308338 |
| Mg16 | -4.154093 | 0.275023  | 2.785811  |
| Mg17 | -3.623267 | -3.036174 | -0.964552 |
| Mg18 | -5.734509 | 1.461865  | 0.535053  |

|      |           |           |           |
|------|-----------|-----------|-----------|
| Mg19 | -0.858692 | -3.468882 | -2.142040 |
| Mg20 | -2.814768 | -2.414713 | 1.978392  |
| Mg21 | -5.585531 | -1.482786 | 0.759589  |
| Mg22 | -0.944057 | 3.837614  | -0.705672 |
| Mg23 | -2.702974 | -0.096932 | -0.119591 |
| Mg24 | 2.282697  | -3.029171 | -1.504537 |
| Mg25 | 2.707366  | -2.864187 | 1.564463  |
| Mg26 | -5.181247 | -0.171990 | -1.946826 |
| Mg27 | 4.909165  | -0.781910 | 2.175988  |
| Mg28 | 5.047168  | -2.433611 | -0.439901 |
| Mg29 | 3.973976  | -0.530398 | -2.692154 |
| Mg30 | 0.074960  | -2.477677 | 3.264068  |
| Mg31 | 6.161227  | 0.297215  | -0.269509 |

@mg31-isomer32 bp86/6-31G(d) Etot=-6202.997952 Eb=-16.95

|      |           |           |           |
|------|-----------|-----------|-----------|
| Mg1  | -1.281307 | -0.978433 | 0.314814  |
| Mg2  | 0.791054  | 0.060637  | -3.287075 |
| Mg3  | -3.894805 | -0.384941 | -1.716894 |
| Mg4  | 1.004765  | 3.528102  | -1.728767 |
| Mg5  | -1.100022 | 1.342576  | -1.395582 |
| Mg6  | 3.547523  | -1.176970 | -3.028182 |
| Mg7  | -4.318755 | -0.978577 | 1.366910  |
| Mg8  | 3.321923  | 1.759030  | -2.388088 |
| Mg9  | -2.753569 | -3.499492 | 2.016304  |
| Mg10 | -1.445653 | -2.137256 | -2.602237 |
| Mg11 | -2.160903 | 0.369596  | -4.075513 |
| Mg12 | -1.827874 | -0.868632 | 3.318249  |
| Mg13 | 0.651851  | 4.837450  | 1.023225  |
| Mg14 | 3.343259  | 3.121084  | 0.352317  |
| Mg15 | 1.476792  | 0.672081  | 0.084312  |
| Mg16 | 4.610885  | -0.054134 | -0.312297 |
| Mg17 | -3.711908 | -3.204307 | -0.775343 |
| Mg18 | -0.786763 | 2.053392  | 1.694566  |
| Mg19 | -0.908072 | -4.206886 | -0.356446 |
| Mg20 | -1.823473 | 4.235226  | -0.526601 |
| Mg21 | 0.287106  | -2.848014 | 2.273787  |
| Mg22 | 1.839745  | 2.914933  | 2.993234  |
| Mg23 | 1.276511  | -2.136936 | -1.154434 |
| Mg24 | -3.605157 | 2.642666  | -2.590009 |
| Mg25 | 3.052487  | -1.800375 | 1.606430  |
| Mg26 | 4.015004  | 0.978148  | 2.480230  |
| Mg27 | 4.271337  | -3.163624 | -0.925312 |
| Mg28 | 1.028078  | -0.015010 | 3.152754  |
| Mg29 | -3.657695 | 1.854260  | 0.357246  |
| Mg30 | -3.341523 | 1.704850  | 3.329695  |
| Mg31 | 2.099159  | -4.620443 | 0.498710  |

@mg31-isomer33 bp86/6-31G(d) Etot=-6202.986189 Eb=-16.71

|      |           |           |           |
|------|-----------|-----------|-----------|
| Mg1  | -2.054885 | -0.464809 | 0.176415  |
| Mg2  | 1.343203  | -0.373878 | -2.382678 |
| Mg3  | -2.365187 | 2.382396  | -1.280059 |
| Mg4  | -0.526153 | -2.721399 | -1.998555 |
| Mg5  | 2.523991  | -3.239257 | -2.130938 |
| Mg6  | 0.429093  | 1.338660  | 0.097973  |
| Mg7  | 0.717495  | -1.687693 | 0.776621  |
| Mg8  | 0.852912  | 1.038886  | 3.200926  |
| Mg9  | -4.628110 | 1.801201  | 0.702692  |
| Mg10 | -2.859602 | 4.292815  | 1.181757  |
| Mg11 | 1.930779  | 4.498658  | -0.770275 |
| Mg12 | 4.286545  | -0.898763 | -1.527901 |
| Mg13 | -1.973896 | -4.761477 | -0.307303 |
| Mg14 | 3.176471  | 1.986870  | -1.703345 |
| Mg15 | -3.479059 | -2.921901 | 1.595283  |
| Mg16 | 5.474276  | 1.487205  | 0.208181  |

|      |           |           |           |
|------|-----------|-----------|-----------|
| Mg17 | -5.471315 | -1.066581 | 0.380115  |
| Mg18 | 5.996047  | -1.375497 | 0.928175  |
| Mg19 | -1.956214 | 1.711483  | 2.423896  |
| Mg20 | 3.009978  | 2.848651  | 1.421503  |
| Mg21 | -0.692912 | -3.939303 | 2.298561  |
| Mg22 | -1.646401 | -0.046255 | -2.968634 |
| Mg23 | 3.136974  | -0.194346 | 1.599418  |
| Mg24 | 0.115392  | 3.965807  | 1.746089  |
| Mg25 | 0.287264  | 2.533242  | -2.763457 |
| Mg26 | 3.579512  | -3.221496 | 0.678166  |
| Mg27 | -3.567592 | -2.527796 | -1.669267 |
| Mg28 | 1.053852  | -4.742911 | -0.037089 |
| Mg29 | -0.950839 | 4.985330  | -1.062934 |
| Mg30 | -1.212616 | -1.091889 | 3.224305  |
| Mg31 | -4.529002 | 0.404047  | -2.037641 |

@mg31-isomer34 bp86/6-31G(d) Etot=-6202.971330 Eb=-16.41

|      |           |           |           |
|------|-----------|-----------|-----------|
| Mg1  | 1.996329  | -0.416744 | 0.044233  |
| Mg2  | -1.101710 | -0.149579 | -0.233499 |
| Mg3  | 0.421687  | 0.054215  | 2.769204  |
| Mg4  | -0.408181 | -2.658667 | 1.493877  |
| Mg5  | 5.035736  | 1.131196  | 1.331536  |
| Mg6  | 4.690956  | -1.900315 | 1.356493  |
| Mg7  | 2.167093  | -2.524586 | 2.876693  |
| Mg8  | 3.453917  | -0.001264 | 3.575923  |
| Mg9  | 4.934791  | -0.266959 | -1.289790 |
| Mg10 | -0.069249 | -2.641469 | -1.620178 |
| Mg11 | -3.007748 | -2.678802 | -0.170445 |
| Mg12 | 3.270986  | 2.558637  | -0.615147 |
| Mg13 | -2.759773 | -1.012245 | -2.767332 |
| Mg14 | 2.659851  | 2.646276  | 2.478569  |
| Mg15 | 2.331257  | -3.576648 | -0.003981 |
| Mg16 | -2.164582 | 2.090410  | -2.338391 |
| Mg17 | 3.025765  | 1.002446  | -3.197700 |
| Mg18 | -1.362095 | 4.489045  | -0.694972 |
| Mg19 | 5.021504  | -3.300304 | -1.321372 |
| Mg20 | 0.160728  | -0.005443 | -3.050338 |
| Mg21 | -4.258870 | 0.496160  | -0.659460 |
| Mg22 | 2.707085  | -1.983166 | -2.723354 |
| Mg23 | 0.396281  | 2.175465  | 0.568125  |
| Mg24 | -2.764692 | -0.575047 | 2.292105  |
| Mg25 | -2.750802 | 2.366052  | 1.072429  |
| Mg26 | -5.445420 | -2.017814 | 1.644094  |
| Mg27 | 0.742005  | 2.914794  | -2.368540 |
| Mg28 | 1.374160  | 4.978068  | 0.680168  |
| Mg29 | -5.596352 | -2.020955 | -1.566243 |
| Mg30 | -7.281787 | -0.196214 | 0.208966  |
| Mg31 | -5.418870 | 1.023457  | 2.228328  |

@mg31-isomer35 bp86/6-31G(d) Etot=-6202.960587 Eb=-16.19

|      |           |           |           |
|------|-----------|-----------|-----------|
| Mg1  | -1.890678 | 1.227313  | 3.464302  |
| Mg2  | -4.508434 | 0.168105  | 2.380330  |
| Mg3  | -4.019857 | -2.691027 | 1.162105  |
| Mg4  | 0.518762  | 0.041255  | 1.954292  |
| Mg5  | -1.692047 | -1.805231 | 2.774648  |
| Mg6  | 0.108161  | 3.056914  | 1.886506  |
| Mg7  | -2.491515 | -0.024109 | 0.103120  |
| Mg8  | 3.736951  | -1.144262 | 2.195791  |
| Mg9  | 2.847260  | -2.552638 | -2.046379 |
| Mg10 | -1.494912 | -4.008496 | 0.362630  |
| Mg11 | -0.185866 | 1.542498  | -0.792723 |
| Mg12 | -0.024443 | -1.582774 | -1.024035 |
| Mg13 | 1.083373  | -4.749101 | -0.893196 |
| Mg14 | -2.859975 | 3.001238  | 1.204811  |



|      |           |           |           |
|------|-----------|-----------|-----------|
| Mg15 | 3.705275  | -3.862090 | 0.504144  |
| Mg16 | 3.076460  | 1.910795  | 2.040689  |
| Mg17 | 4.339361  | 1.632354  | -2.058447 |
| Mg18 | 5.725878  | 0.910343  | 0.791515  |
| Mg19 | 1.571256  | 0.418068  | -3.167282 |
| Mg20 | 2.079922  | 3.434552  | -0.769740 |
| Mg21 | 4.860936  | 3.662682  | 0.162245  |
| Mg22 | 1.088370  | -2.864417 | 1.604212  |
| Mg23 | 2.586618  | -0.002455 | -0.305767 |
| Mg24 | -1.454486 | 0.045058  | -3.296875 |
| Mg25 | -2.786937 | 2.619569  | -1.895354 |
| Mg26 | 5.456325  | -1.639112 | -0.526698 |
| Mg27 | -5.233735 | 1.833400  | -0.259670 |
| Mg28 | -4.435260 | 0.203873  | -2.814039 |
| Mg29 | -2.990203 | -2.357125 | -1.797297 |
| Mg30 | -0.909461 | 4.593628  | -0.555359 |
| Mg31 | -5.807098 | -1.018808 | -0.388477 |

@mg31-isomer36 bp86/6-31G(d) Etot=-6202.948608 Eb=-15.95

|      |           |           |           |
|------|-----------|-----------|-----------|
| Mg1  | 1.970437  | -0.052857 | 0.093340  |
| Mg2  | -1.135051 | -0.205997 | 0.187756  |
| Mg3  | 1.352866  | 0.655357  | 3.194343  |
| Mg4  | -1.461508 | -0.429509 | 3.323682  |
| Mg5  | 5.080909  | 0.996201  | 0.443135  |
| Mg6  | 3.846388  | -1.341116 | 2.241645  |
| Mg7  | 0.757803  | -2.114941 | 2.238141  |
| Mg8  | 4.415013  | 1.269753  | 3.534916  |
| Mg9  | 5.035566  | -1.800059 | -0.577392 |
| Mg10 | 0.245911  | -2.811231 | -0.756567 |
| Mg11 | -2.396021 | -2.790708 | 1.196499  |
| Mg12 | 4.044259  | 3.233309  | -1.361724 |
| Mg13 | -2.385427 | -1.791117 | -2.147032 |
| Mg14 | 2.946143  | 2.836861  | 1.464377  |
| Mg15 | 2.803179  | -3.647793 | 0.558427  |
| Mg16 | -1.701032 | 1.453494  | -2.380750 |
| Mg17 | 3.677936  | 0.394875  | -2.365762 |
| Mg18 | -1.215342 | 4.293018  | -1.229741 |
| Mg19 | 4.644943  | -4.699008 | -1.533975 |
| Mg20 | 0.575109  | -0.505092 | -2.765770 |
| Mg21 | -4.341814 | 0.341141  | -1.604864 |
| Mg22 | 2.729521  | -2.553458 | -2.580238 |
| Mg23 | 0.076456  | 2.402073  | 0.825839  |
| Mg24 | -3.957600 | -0.232972 | 1.695336  |
| Mg25 | -3.101754 | 2.335700  | 0.351757  |
| Mg26 | -6.921501 | -1.176146 | 1.641647  |
| Mg27 | 1.194653  | 2.355259  | -2.164254 |
| Mg28 | 1.586412  | 5.009017  | -0.472361 |
| Mg29 | -4.856174 | -2.463239 | -0.433069 |
| Mg30 | -7.270686 | -0.585217 | -1.243771 |
| Mg31 | -6.239594 | 1.624403  | 0.626430  |

@mg31-isomer37 bp86/6-31G(d) Etot=-6202.940633 Eb=-15.79

|      |           |           |           |
|------|-----------|-----------|-----------|
| Mg1  | -0.032652 | -0.638364 | -1.070415 |
| Mg2  | -0.752536 | -0.285174 | 2.023284  |
| Mg3  | -1.397383 | 2.703271  | -0.024973 |
| Mg4  | 1.908345  | -2.049056 | 2.338775  |
| Mg5  | 1.952001  | 0.667575  | 0.803117  |
| Mg6  | 4.393364  | -0.126164 | 2.442349  |
| Mg7  | 2.668862  | 0.059875  | -2.362757 |
| Mg8  | -2.820364 | 0.057645  | -0.070889 |
| Mg9  | 1.297840  | 3.720311  | 0.707965  |
| Mg10 | -2.887679 | -1.489661 | -2.859967 |
| Mg11 | -2.929514 | 1.896810  | 2.568450  |
| Mg12 | -5.433188 | 0.228907  | 1.557610  |

|      |           |           |           |
|------|-----------|-----------|-----------|
| Mg13 | 5.576914  | 0.224134  | -1.651578 |
| Mg14 | 0.824210  | 2.440974  | -2.019873 |
| Mg15 | -0.726489 | -3.386893 | 2.217533  |
| Mg16 | 6.752629  | -1.094405 | 0.782912  |
| Mg17 | 2.695665  | -2.931057 | -2.677390 |
| Mg18 | -1.827192 | 1.266087  | -2.870302 |
| Mg19 | 3.763866  | 2.826847  | 2.139334  |
| Mg20 | -4.986868 | 0.985341  | -1.913855 |
| Mg21 | 1.192031  | -3.632941 | -0.153654 |
| Mg22 | -2.158092 | -3.219647 | -0.488836 |
| Mg23 | -3.547507 | -2.241909 | 2.033231  |
| Mg24 | -3.588279 | 3.633309  | -2.304122 |
| Mg25 | -3.802412 | -0.346467 | 4.244654  |
| Mg26 | -4.575683 | 3.006877  | 0.371848  |
| Mg27 | -0.320766 | -3.049514 | -2.913562 |
| Mg28 | 6.260735  | 1.901089  | 0.758661  |
| Mg29 | 3.801348  | 2.667307  | -0.960158 |
| Mg30 | 3.799041  | -1.903001 | -0.026756 |
| Mg31 | -5.100248 | -1.892106 | -0.620636 |

@mg31-isomer38 bp86/6-31G(d) Etot=-6202.936445 Eb=-15.70

|      |           |           |           |
|------|-----------|-----------|-----------|
| Mg1  | -3.321853 | -0.588144 | 0.086504  |
| Mg2  | -4.622258 | 0.945540  | 2.490847  |
| Mg3  | 0.557104  | 2.171422  | 2.429689  |
| Mg4  | -2.445680 | 2.674344  | 1.196556  |
| Mg5  | -4.532413 | -2.064092 | 2.666494  |
| Mg6  | -1.690909 | 0.159865  | 2.873932  |
| Mg7  | 4.898037  | 2.041805  | 0.092098  |
| Mg8  | 0.003884  | -4.528765 | 0.819065  |
| Mg9  | 0.932070  | -1.426658 | 2.411822  |
| Mg10 | 2.232071  | 0.610048  | 0.370757  |
| Mg11 | 4.224891  | -0.933858 | 1.758125  |
| Mg12 | 4.474023  | -0.505537 | -1.467568 |
| Mg13 | 3.620819  | 2.751353  | 2.632705  |
| Mg14 | 4.770775  | -3.580332 | -0.987595 |
| Mg15 | -0.574825 | -1.231877 | -0.340648 |
| Mg16 | 0.918941  | 3.506691  | -2.829200 |
| Mg17 | 2.110251  | -2.456762 | -0.214426 |
| Mg18 | -0.673539 | 4.904892  | -0.571672 |
| Mg19 | -0.223176 | -3.719653 | -2.148583 |
| Mg20 | -1.757579 | -2.850280 | 2.559442  |
| Mg21 | -2.804792 | -3.701500 | -0.088850 |
| Mg22 | -4.013188 | 0.566752  | -3.142360 |
| Mg23 | -2.699758 | -2.039908 | -2.572655 |
| Mg24 | -1.013615 | 0.461483  | -3.259451 |
| Mg25 | 2.173548  | 3.732604  | 0.024111  |
| Mg26 | 1.918909  | 0.611160  | -2.702500 |
| Mg27 | -2.511541 | 2.905356  | -2.005024 |
| Mg28 | 2.639095  | -2.332993 | -3.173346 |
| Mg29 | -0.241966 | 1.708387  | -0.535064 |
| Mg30 | -4.930824 | 1.807241  | -0.460474 |
| Mg31 | 2.583498  | 0.401414  | 4.087269  |

@mg31-isomer39 bp86/6-31G(d) Etot=-6202.935763 Eb=-15.69

|      |           |           |           |
|------|-----------|-----------|-----------|
| Mg1  | -4.049613 | -0.200402 | -0.413263 |
| Mg2  | -2.044068 | 1.160798  | 1.429408  |
| Mg3  | 0.647148  | -0.674534 | 2.257526  |
| Mg4  | -2.098380 | -0.583449 | -2.552111 |
| Mg5  | 0.164070  | 0.465736  | -0.548893 |
| Mg6  | -5.651653 | 0.191737  | 2.228235  |
| Mg7  | -1.565391 | -1.909343 | 0.583679  |
| Mg8  | 1.448236  | -3.018152 | -0.067404 |
| Mg9  | 0.292870  | 3.093291  | 1.491280  |
| Mg10 | 3.019182  | -2.772614 | 2.545357  |

|      |           |           |           |
|------|-----------|-----------|-----------|
| Mg11 | 2.847462  | -0.446687 | 4.422945  |
| Mg12 | -6.511846 | -1.963872 | -0.128219 |
| Mg13 | 2.509099  | 3.083170  | -0.489369 |
| Mg14 | 4.726851  | -2.836060 | 0.127682  |
| Mg15 | -4.733880 | 2.813713  | 1.088750  |
| Mg16 | -1.056764 | -3.761641 | -1.851572 |
| Mg17 | 3.517682  | -2.360989 | -2.509851 |
| Mg18 | 2.419480  | 0.885575  | -2.673560 |
| Mg19 | 0.754283  | -1.581746 | -2.726561 |
| Mg20 | 4.838255  | 2.670193  | -2.362667 |
| Mg21 | 2.883616  | -0.285193 | 0.127258  |
| Mg22 | -6.760050 | 1.266481  | -0.434089 |
| Mg23 | 5.398164  | -0.232900 | -1.550885 |
| Mg24 | -0.325057 | 2.984173  | -1.971377 |
| Mg25 | -3.339445 | 2.249305  | -1.938982 |
| Mg26 | 2.790516  | 1.848035  | 2.403616  |
| Mg27 | 5.085378  | -0.497190 | 2.206142  |
| Mg28 | -3.911923 | -3.207810 | -1.184259 |
| Mg29 | -4.305219 | -2.539382 | 1.855160  |
| Mg30 | 5.243096  | 2.049987  | 0.533063  |
| Mg31 | -2.232096 | 4.109769  | 0.102962  |

@mg31-isomer40 bp86/6-31G(d) Etot=-6202.894190 Eb=-14.85

|      |           |           |           |
|------|-----------|-----------|-----------|
| Mg1  | -1.335101 | -0.543002 | -0.015646 |
| Mg2  | -1.220093 | -3.573442 | -0.517390 |
| Mg3  | -1.735006 | 2.274704  | 1.002673  |
| Mg4  | 3.621656  | -2.459672 | -0.765809 |
| Mg5  | 3.041222  | -0.241403 | 1.481181  |
| Mg6  | 0.985241  | 1.355681  | -0.154931 |
| Mg7  | -4.006672 | 0.938535  | -0.932446 |
| Mg8  | -1.595579 | -2.656594 | 2.387752  |
| Mg9  | 3.275678  | 0.393330  | -1.935417 |
| Mg10 | 5.736098  | -1.730537 | 1.365139  |
| Mg11 | -7.571269 | 2.436949  | 0.472645  |
| Mg12 | 3.901239  | 2.486063  | 0.262353  |
| Mg13 | 0.159909  | -0.020773 | 2.534754  |
| Mg14 | -6.132679 | -0.250469 | 1.377977  |
| Mg15 | 6.058704  | -0.589983 | -1.338501 |
| Mg16 | 1.243778  | -2.609022 | 1.213888  |
| Mg17 | 5.568510  | 1.181171  | 2.480139  |
| Mg18 | 0.802703  | -1.471290 | -1.867265 |
| Mg19 | 7.985080  | 0.230816  | 0.907616  |
| Mg20 | -6.855687 | 1.452519  | -2.221136 |
| Mg21 | 6.924807  | 3.041773  | 0.380495  |
| Mg22 | -5.935871 | -1.315030 | -1.605513 |
| Mg23 | -4.797183 | 2.503606  | 1.688788  |
| Mg24 | 1.462841  | -4.583421 | -1.196574 |
| Mg25 | -5.204519 | 3.758375  | -1.109073 |
| Mg26 | 8.474577  | 1.596666  | -1.766602 |
| Mg27 | -3.919955 | -2.221898 | 0.467152  |
| Mg28 | -2.723013 | -1.388326 | -2.432645 |
| Mg29 | 5.581629  | 2.308642  | -2.264997 |
| Mg30 | -3.200019 | -0.005022 | 2.465976  |
| Mg31 | -8.591024 | -0.298948 | -0.364583 |

@mg32-isomer01 bp86/6-31G(d) Etot=-6403.141877 Eb=-17.88

|     |           |           |           |
|-----|-----------|-----------|-----------|
| Mg1 | 0.209846  | -0.000254 | -2.687619 |
| Mg2 | -3.770700 | 0.000472  | 0.149048  |
| Mg3 | -3.326796 | -2.764868 | 1.616062  |
| Mg4 | 3.420660  | -2.468158 | -0.740871 |
| Mg5 | 0.705356  | -4.034020 | -0.773814 |
| Mg6 | 1.707658  | -0.000060 | 0.139969  |
| Mg7 | -2.741518 | 0.000031  | -2.759558 |
| Mg8 | 1.662132  | -2.732685 | 1.779102  |

|      |           |           |           |
|------|-----------|-----------|-----------|
| Mg9  | -0.821191 | -4.402728 | 2.023848  |
| Mg10 | -1.281266 | 2.843982  | -2.897122 |
| Mg11 | -2.235483 | 4.758693  | -0.569517 |
| Mg12 | -3.876171 | -2.526484 | -1.445443 |
| Mg13 | 4.355023  | -1.468827 | 2.016124  |
| Mg14 | 1.931002  | 0.000119  | 3.323962  |
| Mg15 | -1.282078 | -2.844500 | -2.896727 |
| Mg16 | -0.931719 | 1.499565  | -0.009445 |
| Mg17 | -0.931913 | -1.499555 | -0.009605 |
| Mg18 | 4.355451  | 1.468075  | 2.015853  |
| Mg19 | 1.662903  | 2.732691  | 1.778751  |
| Mg20 | -3.875550 | 2.527117  | -1.445925 |
| Mg21 | 5.265410  | -0.000735 | -0.457514 |
| Mg22 | -0.717642 | 1.549124  | 3.244450  |
| Mg23 | 3.330632  | -0.000699 | -2.750243 |
| Mg24 | 1.729701  | 2.547968  | -3.247881 |
| Mg25 | -3.326242 | 2.766213  | 1.615571  |
| Mg26 | -3.299402 | 0.000890  | 3.053051  |
| Mg27 | -0.820083 | 4.403364  | 2.023059  |
| Mg28 | -2.236745 | -4.758356 | -0.568571 |
| Mg29 | 0.706354  | 4.033267  | -0.774468 |
| Mg30 | -0.718054 | -1.547846 | 3.244215  |
| Mg31 | 3.421523  | 2.467252  | -0.741306 |
| Mg32 | 1.728901  | -2.549050 | -3.247436 |

@mg32-isomer02 bp86/6-31G(d) Etot=-6403.140134 Eb=-17.84

|      |           |           |           |
|------|-----------|-----------|-----------|
| Mg1  | -1.482545 | -0.943071 | 0.132767  |
| Mg2  | -3.277763 | 1.280508  | -1.635931 |
| Mg3  | -4.477772 | -2.003291 | 1.904878  |
| Mg4  | 2.186734  | -3.760252 | -2.128219 |
| Mg5  | 0.499904  | -2.618465 | 2.666830  |
| Mg6  | -0.499867 | -2.618541 | -2.666824 |
| Mg7  | 4.972481  | -1.059300 | 0.778714  |
| Mg8  | -1.527779 | 3.255442  | -3.012026 |
| Mg9  | -2.416322 | 3.692999  | 0.012199  |
| Mg10 | 2.416175  | 3.693017  | -0.012241 |
| Mg11 | 3.224412  | -1.456937 | 3.095610  |
| Mg12 | 3.696902  | 1.001249  | -1.288916 |
| Mg13 | -0.121533 | 5.040949  | 1.464705  |
| Mg14 | -3.696899 | 1.001126  | 1.288897  |
| Mg15 | 0.641466  | 0.336314  | 2.743667  |
| Mg16 | 3.277813  | 1.280627  | 1.635949  |
| Mg17 | -0.641421 | 0.336236  | -2.743667 |
| Mg18 | -4.972452 | -1.059474 | -0.778696 |
| Mg19 | 1.510130  | 2.483331  | -2.761758 |
| Mg20 | -3.224350 | -1.457000 | -3.095583 |
| Mg21 | -0.000125 | 1.727792  | 0.000005  |
| Mg22 | 1.482515  | -0.942919 | -0.132782 |
| Mg23 | 1.527675  | 3.255527  | 3.011935  |
| Mg24 | 0.000069  | -3.881374 | -0.000003 |
| Mg25 | 0.121296  | 5.040868  | -1.464663 |
| Mg26 | -2.186596 | -3.760397 | 2.128261  |
| Mg27 | 3.088393  | -3.474818 | 0.768747  |
| Mg28 | -2.066650 | -0.697693 | 3.271370  |
| Mg29 | 2.066728  | -0.697638 | -3.271354 |
| Mg30 | -1.510231 | 2.483291  | 2.761779  |
| Mg31 | 4.477931  | -2.003134 | -1.904905 |
| Mg32 | -3.088318 | -3.474972 | -0.768742 |

@mg32-isomer03 bp86/6-31G(d) Etot=-6403.139312 Eb=-17.83

|     |           |           |           |
|-----|-----------|-----------|-----------|
| Mg1 | 1.194916  | 1.180683  | 0.851295  |
| Mg2 | 1.702994  | -1.722916 | 2.393741  |
| Mg3 | -1.722475 | -1.702416 | -2.394442 |
| Mg4 | 1.087917  | 1.074840  | 3.768298  |

|      |           |           |           |
|------|-----------|-----------|-----------|
| Mg5  | 4.030132  | -1.684418 | 0.313902  |
| Mg6  | -3.925285 | -0.393374 | 2.478577  |
| Mg7  | 1.181149  | -1.194262 | -0.851220 |
| Mg8  | 1.075785  | -1.086843 | -3.768325 |
| Mg9  | -1.194962 | -1.181207 | 0.850489  |
| Mg10 | 3.329695  | 3.291588  | 2.196110  |
| Mg11 | -3.329246 | -3.292400 | 2.194034  |
| Mg12 | -1.684345 | -4.029971 | -0.314755 |
| Mg13 | -1.703390 | 1.721469  | 2.394723  |
| Mg14 | 0.393098  | -3.923980 | -2.479985 |
| Mg15 | 1.685092  | 4.029673  | -0.313924 |
| Mg16 | 1.640443  | -4.048403 | 0.313154  |
| Mg17 | 3.920768  | -0.435282 | -2.478711 |
| Mg18 | 3.925117  | 0.391844  | 2.479221  |
| Mg19 | 4.048798  | 1.639406  | -0.313505 |
| Mg20 | 1.722101  | 1.703924  | -2.393988 |
| Mg21 | -1.088831 | -1.077363 | 3.767534  |
| Mg22 | -0.435903 | -3.921086 | 2.477800  |
| Mg23 | -1.639307 | 4.048638  | 0.314649  |
| Mg24 | -1.181300 | 1.194847  | -0.850549 |
| Mg25 | 0.436573  | 3.919663  | 2.479224  |
| Mg26 | 3.292518  | -3.328413 | -2.196295 |
| Mg27 | -0.392646 | 3.925390  | -2.478374 |
| Mg28 | -4.029601 | 1.684351  | 0.314922  |
| Mg29 | -4.048866 | -1.639630 | -0.314312 |
| Mg30 | -3.292715 | 3.329445  | -2.193940 |
| Mg31 | -1.076971 | 1.089458  | -3.767404 |
| Mg32 | -3.921249 | 0.436746  | -2.477945 |

@mg32-isomer04 bp86/6-31G(d) Etot=-6403.138468 Eb=-17.81

|      |           |           |           |
|------|-----------|-----------|-----------|
| Mg1  | -2.175340 | -0.187670 | 3.866483  |
| Mg2  | -3.452188 | 1.510970  | -1.622584 |
| Mg3  | -2.037758 | 4.263768  | -1.929338 |
| Mg4  | 0.437179  | 0.542066  | 2.672866  |
| Mg5  | 1.215009  | 3.412359  | 1.723018  |
| Mg6  | 1.761644  | -0.278777 | -0.108331 |
| Mg7  | -3.403563 | 0.568233  | 1.275196  |
| Mg8  | 3.354166  | 2.369759  | -0.188403 |
| Mg9  | 0.934199  | 3.867018  | -1.405209 |
| Mg10 | -3.180101 | -2.501974 | 2.025851  |
| Mg11 | -3.791144 | -4.503825 | -0.196954 |
| Mg12 | -3.562526 | 3.552964  | 0.604140  |
| Mg13 | 4.861647  | 0.208451  | -1.808759 |
| Mg14 | 3.099258  | -1.711319 | -3.171375 |
| Mg15 | -1.675806 | 2.750842  | 2.854612  |
| Mg16 | -1.004732 | -1.298432 | 0.067737  |
| Mg17 | -0.700212 | 1.668986  | -0.069785 |
| Mg18 | 3.997527  | -2.389014 | -0.287359 |
| Mg19 | 1.168789  | -3.306936 | -1.385255 |
| Mg20 | -3.994931 | -1.562524 | -0.848876 |
| Mg21 | 5.089399  | 0.043342  | 1.151469  |
| Mg22 | 0.213994  | -0.901568 | -2.926610 |
| Mg23 | 2.900598  | -1.388066 | 2.772894  |
| Mg24 | -0.200170 | -2.418488 | 3.029606  |
| Mg25 | -2.647546 | -0.716602 | -3.448261 |
| Mg26 | -0.799139 | 1.875650  | -3.292464 |
| Mg27 | -1.812076 | -3.424443 | -2.242245 |
| Mg28 | -1.051558 | 5.042941  | 0.798054  |
| Mg29 | -0.977649 | -4.360970 | 0.663904  |
| Mg30 | 2.251635  | 1.410174  | -2.913468 |
| Mg31 | 1.884851  | -3.797313 | 1.423439  |
| Mg32 | 3.296543  | 1.660401  | 2.916005  |

@mg32-isomer05 bp86/6-31G(d) Etot=-6403.138020 Eb=-17.80

|      |           |           |           |
|------|-----------|-----------|-----------|
| Mg1  | -2.800727 | 1.499617  | 1.716382  |
| Mg2  | -4.706002 | -0.897350 | 1.697174  |
| Mg3  | -2.471932 | 3.511769  | -0.611199 |
| Mg4  | -1.423561 | 4.013353  | 2.332473  |
| Mg5  | -4.019613 | 0.748988  | -0.901280 |
| Mg6  | 0.000013  | 5.275834  | -0.062735 |
| Mg7  | -4.722177 | -2.276596 | -0.867768 |
| Mg8  | -2.481518 | 1.945730  | -3.242211 |
| Mg9  | 1.423575  | 4.013343  | 2.332474  |
| Mg10 | -2.454967 | -0.878051 | 3.571874  |
| Mg11 | 0.000011  | 3.664657  | -2.570423 |
| Mg12 | -2.705710 | -1.157198 | -2.949010 |
| Mg13 | -0.000006 | 1.769954  | 0.103883  |
| Mg14 | -2.831647 | -3.335876 | 1.553350  |
| Mg15 | -1.495016 | -0.935289 | 0.046245  |
| Mg16 | -0.000002 | 0.953468  | 3.048900  |
| Mg17 | 2.471941  | 3.511749  | -0.611194 |
| Mg18 | -2.447617 | -3.913392 | -1.487680 |
| Mg19 | 0.000010  | 0.384361  | -2.666475 |
| Mg20 | -0.000006 | -2.264325 | 2.722855  |
| Mg21 | 2.800725  | 1.499600  | 1.716381  |
| Mg22 | 2.481544  | 1.945722  | -3.242213 |
| Mg23 | -0.000001 | -2.587807 | -2.566362 |
| Mg24 | 1.495003  | -0.935287 | 0.046239  |
| Mg25 | -0.000010 | -3.847414 | 0.273602  |
| Mg26 | 2.454953  | -0.878058 | 3.571884  |
| Mg27 | 2.705718  | -1.157212 | -2.949009 |
| Mg28 | 4.019622  | 0.748969  | -0.901275 |
| Mg29 | 2.831623  | -3.335873 | 1.553353  |
| Mg30 | 4.706001  | -0.897367 | 1.697192  |
| Mg31 | 2.447602  | -3.913403 | -1.487675 |
| Mg32 | 4.722170  | -2.276619 | -0.867752 |

@mg32-isomer06 bp86/6-31G(d) Etot=-6403.137447 Eb=-17.79

|      |           |           |           |
|------|-----------|-----------|-----------|
| Mg1  | 1.901436  | 1.419167  | -3.223980 |
| Mg2  | -1.213153 | 1.305706  | -3.396908 |
| Mg3  | -0.172645 | -1.738010 | 0.539179  |
| Mg4  | 0.347580  | -1.029090 | -2.278447 |
| Mg5  | -3.102032 | -2.035786 | -0.600184 |
| Mg6  | -2.335722 | -1.579405 | -3.449923 |
| Mg7  | 4.480092  | -0.284065 | 1.578971  |
| Mg8  | -0.237549 | -0.294000 | 3.292115  |
| Mg9  | 3.165484  | -1.425600 | -3.288087 |
| Mg10 | -4.750958 | -0.019482 | 0.873157  |
| Mg11 | 3.205068  | 3.474455  | -1.397506 |
| Mg12 | 2.241249  | -1.993382 | 2.672763  |
| Mg13 | -2.928539 | 1.486442  | 2.691780  |
| Mg14 | 2.903657  | -2.057555 | -0.277729 |
| Mg15 | -0.215189 | 2.636337  | 3.120540  |
| Mg16 | -0.275290 | -3.529180 | 3.240163  |
| Mg17 | -2.765931 | -1.749828 | 2.436990  |
| Mg18 | 1.099458  | -4.512288 | 0.628969  |
| Mg19 | 1.604187  | 3.867359  | 1.154696  |
| Mg20 | 4.273602  | 0.662738  | -1.290836 |
| Mg21 | -1.677868 | 3.893985  | 0.845592  |
| Mg22 | 2.451847  | 1.251962  | 3.174094  |
| Mg23 | -1.537152 | 0.845361  | -0.088318 |
| Mg24 | -2.817544 | 3.548155  | -2.003598 |
| Mg25 | 1.477368  | 0.807208  | 0.171597  |
| Mg26 | 1.801262  | -3.985041 | -2.356408 |
| Mg27 | -4.476231 | 2.851823  | 0.297089  |
| Mg28 | -3.974350 | 0.693193  | -1.997486 |
| Mg29 | -1.094642 | -3.957243 | -1.816859 |
| Mg30 | 0.172269  | 3.239229  | -1.481307 |

|      |           |           |          |
|------|-----------|-----------|----------|
| Mg31 | 4.389250  | 2.655035  | 1.188601 |
| Mg32 | -1.939016 | -4.448200 | 1.041282 |

@mg32-isomer07 bp86/6-31G(d) Etot=-6403.137303 Eb=-17.79

|      |           |           |           |
|------|-----------|-----------|-----------|
| Mg1  | 0.439754  | 1.862921  | 0.072288  |
| Mg2  | -2.790977 | 2.323255  | -0.092622 |
| Mg3  | 1.436421  | -2.053136 | -3.101706 |
| Mg4  | -1.504136 | -0.534829 | 0.110218  |
| Mg5  | -4.610015 | -0.134769 | -0.434883 |
| Mg6  | -0.346763 | -3.501940 | -0.767135 |
| Mg7  | 0.368052  | -0.883720 | 2.667299  |
| Mg8  | 3.041008  | 0.781986  | -2.249292 |
| Mg9  | -4.375266 | -2.001493 | 1.978152  |
| Mg10 | -1.125024 | 3.763278  | -2.082174 |
| Mg11 | -3.349134 | -3.043631 | -0.657542 |
| Mg12 | -0.993484 | 1.894540  | 2.797880  |
| Mg13 | -2.958855 | 1.052226  | -2.815110 |
| Mg14 | 1.176053  | 5.274040  | -0.546442 |
| Mg15 | 4.360462  | 0.069455  | 0.442613  |
| Mg16 | 2.420137  | 1.374409  | 2.548786  |
| Mg17 | -3.915423 | 1.051996  | 2.320578  |
| Mg18 | 3.270380  | 3.000083  | -0.003402 |
| Mg19 | 1.535307  | -1.055401 | -0.146400 |
| Mg20 | 4.275225  | -1.950999 | -1.928933 |
| Mg21 | -1.229417 | 4.517166  | 1.071817  |
| Mg22 | 1.410000  | 4.191623  | 2.255373  |
| Mg23 | -4.602573 | -1.625923 | -3.038273 |
| Mg24 | -2.275903 | -0.875440 | 3.792149  |
| Mg25 | 0.027598  | 0.698715  | -2.680012 |
| Mg26 | -1.561616 | -3.237293 | 2.009139  |
| Mg27 | -1.605631 | -1.806890 | -2.939374 |
| Mg28 | 3.299966  | -1.501346 | 2.915094  |
| Mg29 | 1.538041  | -3.718817 | 1.690450  |
| Mg30 | 1.728119  | 3.422503  | -2.733885 |
| Mg31 | 2.507183  | -4.212088 | -1.249332 |
| Mg32 | 4.410510  | -3.140480 | 0.794684  |

@mg32-isomer08 bp86/6-31G(d) Etot=-6403.137034 Eb=-17.78

|      |           |           |           |
|------|-----------|-----------|-----------|
| Mg1  | 3.717017  | -1.164317 | 0.762864  |
| Mg2  | -1.392921 | -2.416768 | -2.551918 |
| Mg3  | -4.217490 | -1.737341 | 1.727920  |
| Mg4  | 1.444321  | -2.874852 | -3.304878 |
| Mg5  | 0.948639  | 3.660666  | 2.281360  |
| Mg6  | -2.020056 | -3.295367 | 0.216747  |
| Mg7  | 2.892145  | 1.171539  | 2.537993  |
| Mg8  | 3.313903  | -0.644978 | -2.167383 |
| Mg9  | -0.071900 | 0.760290  | 2.917880  |
| Mg10 | 0.463198  | -0.027288 | -2.823038 |
| Mg11 | 0.046007  | -4.445463 | 2.145518  |
| Mg12 | -1.343917 | -1.914736 | 2.900190  |
| Mg13 | -0.567368 | 4.504660  | -0.151403 |
| Mg14 | -5.245211 | 1.130595  | -2.104111 |
| Mg15 | 2.797904  | -4.070410 | 1.414660  |
| Mg16 | 2.312362  | 4.284261  | -0.852575 |
| Mg17 | -0.303391 | 2.898725  | -2.718999 |
| Mg18 | -2.019709 | 2.823567  | 1.828857  |
| Mg19 | -2.862377 | 2.764384  | -1.089560 |
| Mg20 | 3.811324  | 4.071710  | 1.740207  |
| Mg21 | 0.564001  | -4.590120 | -0.950508 |
| Mg22 | 3.498816  | -3.583932 | -1.377111 |
| Mg23 | 1.717430  | -1.705036 | 3.049325  |
| Mg24 | 4.066515  | 1.741729  | -0.261257 |
| Mg25 | 2.656807  | 2.225257  | -2.974082 |
| Mg26 | -2.425781 | 0.489060  | -3.120986 |

|      |           |           |           |
|------|-----------|-----------|-----------|
| Mg27 | -4.647544 | 1.119006  | 0.834925  |
| Mg28 | -3.138909 | 0.513208  | 3.367115  |
| Mg29 | 0.949599  | 1.438195  | -0.019735 |
| Mg30 | -4.038761 | -1.491880 | -1.296976 |
| Mg31 | -1.676309 | 0.008727  | 0.072789  |
| Mg32 | 0.771657  | -1.643095 | -0.033832 |

@mg32-isomer09 bp86/6-31G(d) Etot=-6403.136916 Eb=-17.78

|      |           |           |           |
|------|-----------|-----------|-----------|
| Mg1  | -2.233316 | -1.009341 | 3.105871  |
| Mg2  | -4.551846 | -2.245814 | 1.617755  |
| Mg3  | 3.332295  | -3.558034 | 1.840984  |
| Mg4  | -1.889075 | -3.449525 | 0.974282  |
| Mg5  | 0.465138  | -2.671267 | 2.779878  |
| Mg6  | 3.077853  | -1.027045 | 3.288651  |
| Mg7  | -4.072569 | 0.757559  | 1.205850  |
| Mg8  | -3.659242 | -2.375412 | -1.365766 |
| Mg9  | -1.769007 | 2.190026  | 2.608004  |
| Mg10 | 4.438308  | -0.924894 | 0.504120  |
| Mg11 | -5.997225 | -0.793119 | -0.581299 |
| Mg12 | 0.942082  | -4.073361 | 0.039114  |
| Mg13 | 0.480967  | 0.335699  | 2.798757  |
| Mg14 | -3.687311 | 0.696923  | -1.962637 |
| Mg15 | 3.733331  | -3.528198 | -1.128979 |
| Mg16 | -1.221845 | -3.848222 | -2.029750 |
| Mg17 | 1.447495  | -0.968176 | -0.018046 |
| Mg18 | -1.492730 | -0.452796 | 0.046985  |
| Mg19 | 1.121949  | 3.333856  | 3.101493  |
| Mg20 | 3.142350  | 1.626671  | 1.798040  |
| Mg21 | 3.938194  | -0.987309 | -2.614376 |
| Mg22 | -1.318448 | -0.968352 | -3.080909 |
| Mg23 | -2.492686 | 2.943031  | -0.283271 |
| Mg24 | -0.675150 | 4.844161  | 1.395688  |
| Mg25 | 1.353229  | -2.612828 | -2.864882 |
| Mg26 | 0.404649  | 1.857486  | -0.053045 |
| Mg27 | 2.183643  | 4.288653  | 0.255145  |
| Mg28 | 3.446736  | 1.621905  | -1.111109 |
| Mg29 | -1.172851 | 2.186727  | -2.953978 |
| Mg30 | 1.293341  | 0.472290  | -2.992308 |
| Mg31 | -0.378597 | 4.853135  | -1.527309 |
| Mg32 | 1.810335  | 3.485572  | -2.792952 |

@mg32-isomer10 bp86/6-31G(d) Etot=-6403.136539 Eb=-17.77

|      |           |           |           |
|------|-----------|-----------|-----------|
| Mg1  | -0.699457 | 1.552608  | 0.315847  |
| Mg2  | -1.041380 | -1.413933 | -0.074932 |
| Mg3  | -3.142222 | -0.470475 | -2.497063 |
| Mg4  | -0.036697 | 3.779035  | -2.265643 |
| Mg5  | 1.512412  | 2.207530  | 2.458969  |
| Mg6  | 2.914046  | -2.649300 | 1.626950  |
| Mg7  | -0.247492 | 0.529139  | -2.536537 |
| Mg8  | -2.251890 | -1.685701 | 2.953207  |
| Mg9  | -0.004472 | 4.504437  | 0.987207  |
| Mg10 | -0.793536 | -2.533484 | -3.033072 |
| Mg11 | -4.110518 | -1.290597 | 0.387433  |
| Mg12 | -3.429979 | -3.380246 | -1.746405 |
| Mg13 | 2.110435  | -1.167994 | -3.211662 |
| Mg14 | -3.046030 | -4.074049 | 1.214665  |
| Mg15 | 1.869131  | -0.139671 | -0.041515 |
| Mg16 | 4.323307  | 1.938597  | 1.264327  |
| Mg17 | 2.180842  | 2.917774  | -0.514724 |
| Mg18 | 3.456237  | -0.127286 | 3.219511  |
| Mg19 | -0.077040 | -3.776568 | 1.846692  |
| Mg20 | -1.086273 | -4.874129 | -0.888850 |
| Mg21 | 4.160722  | -2.246266 | -1.260874 |
| Mg22 | 2.258461  | 1.901623  | -3.383236 |



|      |           |           |           |
|------|-----------|-----------|-----------|
| Mg23 | -3.736652 | 1.699456  | -0.331187 |
| Mg24 | -2.506376 | 4.531092  | -0.781470 |
| Mg25 | 5.339573  | -0.822487 | 0.987736  |
| Mg26 | -1.161771 | 1.360373  | 3.557525  |
| Mg27 | -2.634750 | 3.635515  | 2.072575  |
| Mg28 | 1.362337  | -3.190366 | -0.914767 |
| Mg29 | -2.602064 | 2.520445  | -3.026249 |
| Mg30 | 0.601786  | -0.847355 | 2.656962  |
| Mg31 | 4.413389  | 0.785954  | -1.594548 |
| Mg32 | -3.894078 | 0.826328  | 2.553124  |

@mg32-isomer11 bp86/6-31G(d) Etot=-6403.135866 Eb=-17.76

|      |           |           |           |
|------|-----------|-----------|-----------|
| Mg1  | 0.014557  | 1.838923  | -0.035323 |
| Mg2  | -1.811468 | 4.556462  | 1.254664  |
| Mg3  | 1.610608  | -0.703583 | -0.087466 |
| Mg4  | -1.412386 | -0.846775 | 0.083840  |
| Mg5  | 2.335337  | 2.068305  | 2.359350  |
| Mg6  | -0.459499 | -0.898440 | -2.948385 |
| Mg7  | -2.672827 | 1.785530  | 2.322146  |
| Mg8  | -2.969399 | 2.436246  | -0.652352 |
| Mg9  | 3.156885  | 2.297056  | -0.560480 |
| Mg10 | -1.062111 | 4.762914  | -1.560533 |
| Mg11 | -0.128220 | -2.630655 | 3.371864  |
| Mg12 | -1.329818 | -3.912435 | 0.914852  |
| Mg13 | 4.510996  | 0.400677  | 1.289054  |
| Mg14 | 1.213141  | 4.573310  | 0.668940  |
| Mg15 | 4.569818  | -2.536596 | 1.194843  |
| Mg16 | -4.416197 | -0.044370 | 0.517053  |
| Mg17 | 1.849843  | 1.017511  | -2.950896 |
| Mg18 | 1.734757  | -3.623166 | 1.222436  |
| Mg19 | 2.318020  | -1.938534 | -3.453632 |
| Mg20 | 2.549613  | -1.101853 | 3.036718  |
| Mg21 | 4.347194  | -0.600191 | -1.584474 |
| Mg22 | -3.254993 | -0.014769 | -2.381212 |
| Mg23 | -2.542132 | -3.104273 | -1.817905 |
| Mg24 | 0.443949  | -3.454258 | -1.526250 |
| Mg25 | -0.116661 | 0.293634  | 2.811113  |
| Mg26 | 1.572085  | 3.973183  | -2.458062 |
| Mg27 | -1.035501 | 2.102000  | -3.085297 |
| Mg28 | -5.326550 | -2.111231 | -1.646733 |
| Mg29 | -2.857104 | -1.309832 | 2.890136  |
| Mg30 | -4.193315 | -3.098481 | 0.883587  |
| Mg31 | 3.508240  | -3.528672 | -1.323768 |
| Mg32 | -0.146860 | 3.352361  | 3.252171  |

@mg32-isomer12 bp86/6-31G(d) Etot=-6403.135132 Eb=-17.74

|      |           |           |           |
|------|-----------|-----------|-----------|
| Mg1  | -0.401012 | -0.250636 | 2.522242  |
| Mg2  | -1.440323 | -3.159362 | 2.990113  |
| Mg3  | 1.784998  | -0.380673 | 0.034000  |
| Mg4  | -2.556974 | 1.527470  | 3.508118  |
| Mg5  | -3.021024 | 1.132380  | -2.284068 |
| Mg6  | -0.447644 | 1.692854  | -0.101573 |
| Mg7  | 0.672067  | 4.642002  | -1.767671 |
| Mg8  | 0.400269  | 2.579308  | 3.000606  |
| Mg9  | 1.838245  | 1.979565  | -2.431443 |
| Mg10 | -3.496224 | -3.825339 | 0.975785  |
| Mg11 | -1.222405 | -1.264381 | -0.187288 |
| Mg12 | 2.530089  | 0.326494  | 3.067340  |
| Mg13 | 2.483666  | 2.651383  | 0.585286  |
| Mg14 | -2.464155 | 4.067781  | 2.021125  |
| Mg15 | -2.685757 | -4.049206 | -1.817138 |
| Mg16 | -0.944012 | 2.884654  | -3.447597 |
| Mg17 | -3.523904 | -1.095754 | 2.227495  |
| Mg18 | 0.214950  | -3.055714 | -2.514254 |

|      |           |           |           |
|------|-----------|-----------|-----------|
| Mg19 | -0.367697 | -4.237506 | 0.255696  |
| Mg20 | 0.181450  | 4.810802  | 1.063195  |
| Mg21 | 4.841397  | 0.642570  | 1.257140  |
| Mg22 | -0.170412 | -0.070381 | -2.858333 |
| Mg23 | 5.041599  | -1.686119 | -0.804100 |
| Mg24 | 1.379920  | -2.679729 | 2.280749  |
| Mg25 | -4.222509 | -1.363547 | -0.817179 |
| Mg26 | 4.272303  | -2.171614 | 1.986832  |
| Mg27 | 4.470100  | 1.085726  | -1.603134 |
| Mg28 | -2.302622 | 4.042477  | -1.004261 |
| Mg29 | -3.487369 | 1.463691  | 0.590157  |
| Mg30 | -2.643441 | -1.635617 | -3.439381 |
| Mg31 | 2.536806  | -3.367124 | -0.468522 |
| Mg32 | 2.749623  | -1.236455 | -2.819938 |

@mg32-isomer13 bp86/6-31G(d) Etot=-6403.135098 Eb=-17.74

|      |           |           |           |
|------|-----------|-----------|-----------|
| Mg1  | 4.140579  | -0.054573 | 1.441093  |
| Mg2  | 1.604105  | 0.977638  | 2.929362  |
| Mg3  | 3.415037  | 3.054415  | 1.825530  |
| Mg4  | -0.520506 | -3.171037 | -0.973696 |
| Mg5  | 2.648705  | -1.951589 | 3.339136  |
| Mg6  | 4.093454  | -3.171981 | 1.153899  |
| Mg7  | -4.326463 | 0.888997  | -0.874662 |
| Mg8  | 0.352409  | 1.802747  | 0.082807  |
| Mg9  | -1.952172 | 2.523582  | -2.275661 |
| Mg10 | -3.160587 | 0.037110  | -3.488908 |
| Mg11 | -0.276468 | -1.464042 | 2.838370  |
| Mg12 | 2.361128  | 4.684253  | -0.383979 |
| Mg13 | 3.279561  | 1.653659  | -0.925497 |
| Mg14 | -4.961217 | -1.534093 | 1.060893  |
| Mg15 | -1.548353 | -2.478138 | -3.712564 |
| Mg16 | 0.509401  | 4.049925  | 2.049922  |
| Mg17 | 1.047209  | -3.953128 | 1.602116  |
| Mg18 | 1.403554  | -1.021966 | 0.206840  |
| Mg19 | -4.366302 | 1.223771  | 2.129850  |
| Mg20 | -3.181286 | -1.160547 | 3.435826  |
| Mg21 | 3.930594  | -1.371752 | -1.418873 |
| Mg22 | 1.124091  | 3.020289  | -2.690711 |
| Mg23 | -0.173476 | 0.043619  | -2.422722 |
| Mg24 | 2.598676  | 0.439198  | -3.618330 |
| Mg25 | -3.541188 | -2.266920 | -1.456313 |
| Mg26 | -0.515086 | 4.866144  | -0.812620 |
| Mg27 | 2.450589  | -4.195742 | -1.068266 |
| Mg28 | -1.760654 | -0.350746 | 0.258085  |
| Mg29 | -1.372360 | 1.385955  | 2.915094  |
| Mg30 | -2.378610 | -3.244501 | 1.366422  |
| Mg31 | -2.456153 | 3.041919  | 0.656591  |
| Mg32 | 1.531790  | -2.302468 | -3.169035 |

@mg32-isomer14 bp86/6-31G(d) Etot=-6403.134976 Eb=-17.74

|      |           |           |           |
|------|-----------|-----------|-----------|
| Mg1  | -3.644141 | 2.001983  | 0.947341  |
| Mg2  | -2.451640 | 4.120655  | -1.087690 |
| Mg3  | -2.822832 | 4.726423  | 1.954591  |
| Mg4  | -3.689074 | 1.574206  | -2.052945 |
| Mg5  | -0.079390 | 4.350722  | 0.946482  |
| Mg6  | -3.965899 | -0.799563 | -0.186399 |
| Mg7  | -2.848589 | -0.487319 | 2.681875  |
| Mg8  | 0.249490  | 4.085370  | -2.236423 |
| Mg9  | -1.397684 | 2.243679  | 2.996588  |
| Mg10 | -0.697687 | 1.416585  | -0.132501 |
| Mg11 | -3.657001 | -3.295461 | 1.580397  |
| Mg12 | -1.055996 | 1.586473  | -3.372801 |
| Mg13 | -2.548007 | -1.091999 | -2.963269 |
| Mg14 | -3.424438 | -3.601128 | -1.363436 |

|      |           |           |           |
|------|-----------|-----------|-----------|
| Mg15 | 2.302374  | 3.011235  | -0.284530 |
| Mg16 | 1.571594  | 2.151552  | 2.548991  |
| Mg17 | -0.935381 | -1.535511 | 0.018672  |
| Mg18 | 0.157611  | -0.428323 | 2.877869  |
| Mg19 | -1.316635 | -3.107557 | 3.231188  |
| Mg20 | 1.929381  | 1.531842  | -2.965285 |
| Mg21 | 1.872434  | -0.192825 | 0.050310  |
| Mg22 | 0.465639  | -1.033485 | -2.867742 |
| Mg23 | -0.940993 | -3.784844 | -2.806184 |
| Mg24 | -1.079698 | -4.601352 | 0.386531  |
| Mg25 | 4.371531  | 1.803502  | 1.540577  |
| Mg26 | 4.560818  | 1.390375  | -1.496586 |
| Mg27 | 1.273285  | -3.095736 | 1.863950  |
| Mg28 | 3.309425  | -0.758471 | 2.728184  |
| Mg29 | 1.460577  | -3.355544 | -1.165042 |
| Mg30 | 3.602495  | -1.311141 | -2.260890 |
| Mg31 | 5.569706  | -0.618168 | 0.392653  |
| Mg32 | 3.858725  | -2.896177 | 0.495523  |

@mg32-isomer15 bp86/6-31G(d) Etot=-6403.134531 Eb=-17.73

|      |           |           |           |
|------|-----------|-----------|-----------|
| Mg1  | -4.772225 | 1.527207  | 1.297252  |
| Mg2  | -2.892814 | 3.829638  | 1.253469  |
| Mg3  | -2.678510 | 1.779880  | 3.415551  |
| Mg4  | -0.143192 | 3.133404  | 2.366370  |
| Mg5  | -3.131576 | -1.006602 | 2.360319  |
| Mg6  | -4.129550 | -0.607655 | -0.682710 |
| Mg7  | -3.577402 | 2.540124  | -1.416030 |
| Mg8  | -0.431550 | 3.737337  | -0.564267 |
| Mg9  | -0.203515 | 0.099725  | 3.034520  |
| Mg10 | 2.410655  | 1.907060  | 3.187748  |
| Mg11 | -0.735570 | -2.960607 | 2.982816  |
| Mg12 | -2.438026 | -2.995809 | 0.218377  |
| Mg13 | -1.529920 | 0.844646  | 0.303346  |
| Mg14 | 2.456524  | 3.785500  | 0.785804  |
| Mg15 | 2.061818  | 3.260509  | -2.253942 |
| Mg16 | -3.134885 | -2.577950 | -2.814878 |
| Mg17 | 2.492153  | -1.075878 | 2.786542  |
| Mg18 | -3.311109 | 0.412440  | -3.464961 |
| Mg19 | -0.927359 | 2.248574  | -3.077123 |
| Mg20 | 0.417023  | -1.810847 | 0.372225  |
| Mg21 | 1.381209  | 0.957582  | -0.154954 |
| Mg22 | 2.079249  | -4.017422 | 2.192237  |
| Mg23 | -0.328977 | -5.109407 | 0.835952  |
| Mg24 | 4.338261  | 0.965217  | 1.043301  |
| Mg25 | -0.492924 | -3.928179 | -2.047852 |
| Mg26 | -0.746164 | -0.716839 | -2.226974 |
| Mg27 | 4.798727  | 3.181083  | -0.990108 |
| Mg28 | 1.502550  | 0.638591  | -3.689295 |
| Mg29 | 3.572184  | -1.910613 | 0.127500  |
| Mg30 | 2.040816  | -2.041524 | -2.506739 |
| Mg31 | 2.118878  | -4.508210 | -0.752387 |
| Mg32 | 3.935218  | 0.419024  | -1.921110 |

@mg32-isomer16 bp86/6-31G(d) Etot=-6403.134081 Eb=-17.72

|      |           |           |           |
|------|-----------|-----------|-----------|
| Mg1  | -5.704429 | -1.923975 | -0.825856 |
| Mg2  | 2.689459  | 0.820715  | 3.520768  |
| Mg3  | -3.010247 | -0.985616 | 3.185049  |
| Mg4  | 2.667347  | -1.101996 | -3.669315 |
| Mg5  | 2.521319  | 3.822186  | -1.922264 |
| Mg6  | -3.083936 | -2.136055 | -2.378184 |
| Mg7  | -1.320756 | 4.510885  | 1.162914  |
| Mg8  | 1.455778  | 5.045364  | 0.558670  |
| Mg9  | -4.604448 | 0.295802  | 1.046635  |
| Mg10 | 0.334597  | 1.677939  | -0.062037 |

|      |           |           |           |
|------|-----------|-----------|-----------|
| Mg11 | 1.238234  | -1.237785 | 0.064465  |
| Mg12 | -3.516674 | -2.902570 | 0.831274  |
| Mg13 | -1.750691 | -0.480939 | -0.008571 |
| Mg14 | 3.924319  | -3.525707 | 0.855974  |
| Mg15 | 1.241898  | -4.552407 | 1.020493  |
| Mg16 | 2.119864  | -2.186560 | 2.961187  |
| Mg17 | -0.468044 | 4.013501  | -1.887274 |
| Mg18 | 4.058784  | -0.454059 | 1.167398  |
| Mg19 | -0.938099 | -3.511089 | -0.784702 |
| Mg20 | 4.497318  | -1.950663 | -1.559356 |
| Mg21 | -2.882176 | 2.554459  | -0.413923 |
| Mg22 | 1.958662  | -3.576235 | -1.877705 |
| Mg23 | 3.257324  | 0.881281  | -1.429828 |
| Mg24 | 3.141871  | 2.564499  | 1.039809  |
| Mg25 | 0.685973  | 3.075311  | 2.858738  |
| Mg26 | -0.142062 | -1.249101 | -2.777235 |
| Mg27 | -2.312342 | 1.979074  | 2.533910  |
| Mg28 | -1.785093 | 1.253895  | -2.912398 |
| Mg29 | -0.847575 | -2.898792 | 2.303844  |
| Mg30 | -0.028601 | 0.027149  | 2.766988  |
| Mg31 | 1.111056  | 1.601219  | -3.407118 |
| Mg32 | -4.508632 | 0.550270  | -1.962348 |

@mg32-isomer17 bp86/6-31G(d) Etot=-6403.134011 Eb=-17.72

|      |           |           |           |
|------|-----------|-----------|-----------|
| Mg1  | 4.785629  | 0.171137  | 1.249328  |
| Mg2  | 4.975518  | -2.574170 | 0.262121  |
| Mg3  | 4.488259  | -0.410517 | -1.773075 |
| Mg4  | 2.062540  | 4.364620  | 1.015940  |
| Mg5  | 2.490999  | 1.670157  | 2.450321  |
| Mg6  | 2.983827  | -1.675940 | 2.758606  |
| Mg7  | 3.219632  | 2.100247  | -0.529943 |
| Mg8  | -0.170541 | 3.275566  | 2.750952  |
| Mg9  | -0.598998 | 5.258431  | 0.389868  |
| Mg10 | 2.607154  | -4.062582 | 0.853232  |
| Mg11 | 1.763763  | -0.833989 | 0.005871  |
| Mg12 | 2.905370  | -2.888674 | -2.117657 |
| Mg13 | 2.090008  | 0.927180  | -3.002217 |
| Mg14 | 0.083170  | 0.005193  | 2.700784  |
| Mg15 | 1.135211  | 3.874454  | -2.028873 |
| Mg16 | 0.022715  | 1.725453  | -0.098534 |
| Mg17 | 0.169902  | -2.981167 | 2.165575  |
| Mg18 | -0.782855 | 1.584379  | -3.378000 |
| Mg19 | -2.646767 | 3.090300  | 0.929570  |
| Mg20 | -2.445815 | 1.364083  | 3.476866  |
| Mg21 | -1.838834 | 4.030860  | -1.990794 |
| Mg22 | 0.234362  | -3.636438 | -0.863187 |
| Mg23 | 0.145843  | -1.341087 | -2.914880 |
| Mg24 | -1.352991 | -0.933540 | -0.066415 |
| Mg25 | -2.413348 | -1.670542 | 3.028835  |
| Mg26 | -4.038037 | 0.299529  | 1.186264  |
| Mg27 | -2.261276 | -3.350994 | -2.440846 |
| Mg28 | -4.920384 | -2.609333 | 1.641642  |
| Mg29 | -2.413315 | -3.805286 | 0.660682  |
| Mg30 | -3.150299 | 1.341349  | -1.478316 |
| Mg31 | -2.783536 | -0.688931 | -3.649005 |
| Mg32 | -4.346905 | -1.619751 | -1.194715 |

@mg32-isomer18 bp86/6-31G(d) Etot=-6403.133889 Eb=-17.72

|     |           |           |           |
|-----|-----------|-----------|-----------|
| Mg1 | -0.337397 | -3.933661 | -2.579077 |
| Mg2 | 5.352346  | -0.752294 | 2.052004  |
| Mg3 | 4.105587  | 1.887921  | -2.045522 |
| Mg4 | -1.874888 | 1.369108  | -3.156241 |
| Mg5 | -0.741697 | 4.093985  | -2.250920 |
| Mg6 | -1.018927 | 1.310140  | -0.059966 |

|      |           |           |           |
|------|-----------|-----------|-----------|
| Mg7  | 2.135657  | -2.763229 | -1.364308 |
| Mg8  | -0.831967 | 4.367972  | 0.817722  |
| Mg9  | 1.796013  | 3.453954  | -0.598415 |
| Mg10 | 0.288046  | -4.570701 | 0.412351  |
| Mg11 | -2.381357 | -4.103870 | 1.947201  |
| Mg12 | 3.071983  | -0.620701 | -3.356428 |
| Mg13 | -3.602964 | 4.140474  | 1.919055  |
| Mg14 | -1.591729 | 2.155310  | 3.007123  |
| Mg15 | 0.137785  | -0.879264 | -2.870904 |
| Mg16 | -0.682055 | -1.711131 | 0.043817  |
| Mg17 | 1.723540  | 0.270836  | -0.251415 |
| Mg18 | -3.926965 | 1.122676  | 1.347415  |
| Mg19 | -2.405604 | -1.063858 | 2.839337  |
| Mg20 | 0.123452  | -3.056776 | 3.099531  |
| Mg21 | -3.291229 | 3.345893  | -0.970846 |
| Mg22 | 1.336823  | 2.726251  | 2.238062  |
| Mg23 | -4.115472 | 0.429719  | -1.499020 |
| Mg24 | -2.656646 | -4.549483 | -0.940875 |
| Mg25 | 3.055485  | 0.489105  | 3.404040  |
| Mg26 | 1.198326  | 1.903960  | -3.136390 |
| Mg27 | -3.815922 | -1.945473 | 0.304273  |
| Mg28 | 2.579821  | -2.151082 | 1.523700  |
| Mg29 | 4.127866  | 1.940259  | 0.968011  |
| Mg30 | 0.355935  | -0.120623 | 2.542975  |
| Mg31 | 4.573513  | -0.870461 | -0.768002 |
| Mg32 | -2.687358 | -1.914958 | -2.618289 |

@mg32-isomer19 bp86/6-31G(d) Etot=-6403.133762 Eb=-17.72

|      |           |           |           |
|------|-----------|-----------|-----------|
| Mg1  | -2.570604 | -0.745549 | -2.477236 |
| Mg2  | -3.851265 | -2.659221 | -0.605073 |
| Mg3  | -1.455724 | -3.741194 | -2.019135 |
| Mg4  | -3.806115 | 1.993890  | -2.359911 |
| Mg5  | -0.862524 | 1.736708  | -3.315736 |
| Mg6  | -2.311767 | -4.744287 | 0.831496  |
| Mg7  | 0.390424  | -0.942234 | -2.571382 |
| Mg8  | -4.178002 | 0.253762  | 0.101188  |
| Mg9  | 1.454403  | -3.924189 | -2.643344 |
| Mg10 | 2.235241  | 1.382106  | -3.091135 |
| Mg11 | -2.120170 | 4.316658  | -1.756884 |
| Mg12 | -3.149611 | -1.745076 | 2.186417  |
| Mg13 | -0.687979 | -1.663477 | 0.195645  |
| Mg14 | 0.628679  | -4.470738 | 0.354307  |
| Mg15 | -1.276184 | 1.279878  | -0.143471 |
| Mg16 | 3.268992  | -1.504094 | -3.255859 |
| Mg17 | -4.009698 | 3.332967  | 0.347451  |
| Mg18 | 0.688092  | 3.408677  | -1.298898 |
| Mg19 | -2.972927 | 1.547843  | 2.588500  |
| Mg20 | -0.836030 | -3.550968 | 3.022705  |
| Mg21 | 1.582223  | 0.498459  | 0.142798  |
| Mg22 | 2.713698  | -2.343329 | -0.372161 |
| Mg23 | 4.570056  | 0.157309  | -1.093959 |
| Mg24 | -1.189838 | 4.184524  | 1.156744  |
| Mg25 | 3.636805  | 2.996415  | -1.001913 |
| Mg26 | 4.574694  | 1.928945  | 1.614893  |
| Mg27 | 4.366018  | -0.951009 | 1.763041  |
| Mg28 | 1.836111  | 3.326434  | 1.496869  |
| Mg29 | -0.232177 | 2.527675  | 3.453410  |
| Mg30 | 1.789148  | -2.277346 | 2.501766  |
| Mg31 | -0.516492 | -0.357592 | 2.977414  |
| Mg32 | 2.292523  | 0.748054  | 3.271454  |

@mg32-isomer20 bp86/6-31G(d) Etot=-6403.131684 Eb=-17.68

|     |          |           |           |
|-----|----------|-----------|-----------|
| Mg1 | 5.040098 | -1.873904 | -0.915098 |
| Mg2 | 4.271588 | 0.849022  | -1.661005 |

|      |           |           |           |
|------|-----------|-----------|-----------|
| Mg3  | 4.007732  | 0.988845  | 1.339048  |
| Mg4  | 3.986358  | -2.003603 | 1.853005  |
| Mg5  | 2.700397  | 3.133973  | -0.360918 |
| Mg6  | 2.716936  | -1.531169 | -2.889427 |
| Mg7  | 2.566566  | -3.581696 | -0.404235 |
| Mg8  | 1.456033  | 1.335087  | -2.572803 |
| Mg9  | 1.677837  | 2.922764  | 2.586878  |
| Mg10 | 1.696688  | -0.648214 | -0.059978 |
| Mg11 | 1.829089  | -0.127541 | 3.196698  |
| Mg12 | 0.441482  | 4.222246  | -2.148426 |
| Mg13 | 0.565003  | 5.130981  | 0.682460  |
| Mg14 | 1.377040  | -3.193053 | 2.524597  |
| Mg15 | -0.302482 | -0.808258 | -3.818043 |
| Mg16 | 0.381149  | -3.460672 | -2.640863 |
| Mg17 | -0.012964 | 1.851146  | 0.280408  |
| Mg18 | -0.530608 | -3.572962 | 0.178912  |
| Mg19 | -1.446935 | 2.018133  | -3.009018 |
| Mg20 | -1.428367 | 3.971821  | 2.520417  |
| Mg21 | -0.716668 | -0.959857 | 1.814704  |
| Mg22 | -1.246469 | -0.508659 | -0.980048 |
| Mg23 | -0.911646 | 1.255190  | 3.686741  |
| Mg24 | -2.089572 | 4.085785  | -0.452788 |
| Mg25 | -2.723410 | -3.133006 | -2.036401 |
| Mg26 | -1.614832 | -3.551749 | 3.151178  |
| Mg27 | -3.434306 | -0.435281 | -3.224583 |
| Mg28 | -3.556010 | -3.604928 | 0.891871  |
| Mg29 | -3.975843 | 1.880207  | -1.413198 |
| Mg30 | -4.266420 | -0.937312 | -0.243398 |
| Mg31 | -3.541873 | -1.177022 | 2.780763  |
| Mg32 | -2.915594 | 1.463686  | 1.342549  |

@mg32-isomer21 bp86/6-31G(d) Etot=-6403.131641 Eb=-17.67

|      |           |           |           |
|------|-----------|-----------|-----------|
| Mg1  | 5.736599  | -1.092384 | 1.101613  |
| Mg2  | 3.527943  | -2.687825 | -0.250964 |
| Mg3  | 3.205848  | -0.912299 | 2.610619  |
| Mg4  | 1.190368  | -3.107143 | 1.640114  |
| Mg5  | 5.016482  | -0.474284 | -1.691966 |
| Mg6  | -1.155957 | -4.865839 | 0.794856  |
| Mg7  | 0.820181  | -3.719225 | -1.341533 |
| Mg8  | -1.628137 | -3.012915 | 3.062466  |
| Mg9  | 4.210043  | 1.478514  | 0.745506  |
| Mg10 | 2.286335  | -1.403783 | -2.865233 |
| Mg11 | 0.113050  | -0.555396 | 2.759561  |
| Mg12 | 1.669290  | -0.154895 | -0.000544 |
| Mg13 | 1.815563  | 1.920023  | 2.836149  |
| Mg14 | -2.163219 | -4.418482 | -1.846576 |
| Mg15 | 3.200942  | 1.755707  | -2.183076 |
| Mg16 | -1.119659 | -1.518800 | -0.114372 |
| Mg17 | -3.675216 | -2.994055 | 0.847845  |
| Mg18 | -0.789550 | -1.908787 | -3.241572 |
| Mg19 | -2.951028 | -0.285159 | 2.810974  |
| Mg20 | -1.135558 | 1.870889  | 3.894449  |
| Mg21 | 0.252203  | 0.926875  | -2.576968 |
| Mg22 | 1.718266  | 3.225905  | 0.159228  |
| Mg23 | -0.919386 | 1.431611  | 0.350721  |
| Mg24 | -0.270627 | 4.193652  | 2.361235  |
| Mg25 | -3.865486 | -2.113269 | -2.069044 |
| Mg26 | -3.906774 | 0.112033  | 0.072389  |
| Mg27 | -2.662924 | 0.525151  | -2.656235 |
| Mg28 | -3.103278 | 2.975071  | 1.984719  |
| Mg29 | 1.102787  | 3.944200  | -2.644758 |
| Mg30 | -1.158264 | 4.574892  | -0.433934 |
| Mg31 | -3.635731 | 2.951789  | -0.968968 |
| Mg32 | -1.725109 | 3.338229  | -3.146700 |

@mg32-isomer22 bp86/6-31G(d) Etot=-6403.129309 Eb=-17.63

|      |           |           |           |
|------|-----------|-----------|-----------|
| Mg1  | 2.934672  | -0.690592 | -2.811666 |
| Mg2  | 4.032441  | 1.730494  | -0.979552 |
| Mg3  | 0.981822  | -1.572751 | -0.107291 |
| Mg4  | 3.204962  | -3.582243 | -1.956248 |
| Mg5  | 4.050092  | -1.302671 | -0.020237 |
| Mg6  | 0.781518  | -4.898381 | -0.657137 |
| Mg7  | 4.038322  | 0.909133  | 1.961398  |
| Mg8  | 2.960632  | -4.028102 | 1.097129  |
| Mg9  | 0.427354  | -2.714704 | -2.856988 |
| Mg10 | 2.347477  | 2.328777  | -3.351151 |
| Mg11 | 0.011608  | -3.655637 | 2.106067  |
| Mg12 | 2.498672  | -1.496122 | 2.764763  |
| Mg13 | -1.711169 | 0.095828  | -0.021649 |
| Mg14 | 2.528940  | 4.482496  | -1.256590 |
| Mg15 | 1.143742  | 1.378098  | 0.290597  |
| Mg16 | 0.120095  | 0.373295  | -2.592161 |
| Mg17 | -1.781258 | -3.207521 | -0.411818 |
| Mg18 | 3.150458  | 3.704032  | 1.497179  |
| Mg19 | -0.342194 | -0.654584 | 2.607708  |
| Mg20 | -0.205799 | 3.314433  | -1.903780 |
| Mg21 | -2.357399 | -1.447925 | -2.767067 |
| Mg22 | -2.876343 | -2.226065 | 2.307867  |
| Mg23 | 1.568771  | 1.504061  | 3.418229  |
| Mg24 | -1.375262 | 2.165052  | 2.702060  |
| Mg25 | 0.227207  | 4.286906  | 0.995005  |
| Mg26 | -5.036975 | -0.211778 | -3.120752 |
| Mg27 | -2.732105 | -0.096523 | 4.531890  |
| Mg28 | -4.338155 | -1.490222 | -0.295942 |
| Mg29 | -2.549866 | 3.112630  | 0.126179  |
| Mg30 | -4.979863 | 1.493496  | -0.684682 |
| Mg31 | -2.676850 | 1.675122  | -2.639027 |
| Mg32 | -4.045547 | 0.721968  | 2.027666  |

@mg32-isomer23 bp86/6-31G(d) Etot=-6403.128717 Eb=-17.62

|      |           |           |           |
|------|-----------|-----------|-----------|
| Mg1  | -2.535847 | 4.505503  | -0.881786 |
| Mg2  | -3.539032 | 3.570372  | 1.676339  |
| Mg3  | -0.567874 | 3.986370  | 1.556248  |
| Mg4  | 2.290320  | 3.207336  | 0.609809  |
| Mg5  | 0.236970  | 3.564121  | -1.489064 |
| Mg6  | -1.886169 | 1.458857  | 3.271864  |
| Mg7  | -2.052322 | 2.595458  | -3.172275 |
| Mg8  | 4.206157  | 1.119430  | 1.882594  |
| Mg9  | 5.130297  | 2.672576  | -0.458596 |
| Mg10 | -4.325804 | 0.703654  | 1.676280  |
| Mg11 | -4.020705 | 1.739738  | -1.084336 |
| Mg12 | 2.775075  | 2.092483  | -2.297718 |
| Mg13 | 1.169015  | 1.743317  | 2.953436  |
| Mg14 | -1.203160 | 1.240769  | 0.205640  |
| Mg15 | 2.732420  | -0.963967 | 3.465760  |
| Mg16 | 0.168005  | 0.574429  | -2.574051 |
| Mg17 | 1.700805  | 0.108560  | 0.188085  |
| Mg18 | -0.120277 | -0.977714 | 2.782487  |
| Mg19 | -2.899969 | -1.810754 | 2.390750  |
| Mg20 | -3.787332 | -1.351224 | -0.500798 |
| Mg21 | -2.540647 | -0.506532 | -3.078916 |
| Mg22 | 4.563874  | -0.171259 | -1.228162 |
| Mg23 | -0.665334 | -1.655725 | -0.264655 |
| Mg24 | 4.357284  | -1.864818 | 1.146352  |
| Mg25 | 2.649198  | -0.739032 | -3.527122 |
| Mg26 | 1.676983  | -3.198212 | 1.544572  |
| Mg27 | 0.165002  | -2.449935 | -3.282704 |
| Mg28 | -0.884645 | -4.180170 | 2.581519  |

|      |           |           |           |
|------|-----------|-----------|-----------|
| Mg29 | -2.460013 | -3.544365 | -2.458488 |
| Mg30 | 2.469151  | -2.665828 | -1.235309 |
| Mg31 | -2.779500 | -4.193069 | 0.401713  |
| Mg32 | -0.021928 | -4.610366 | -0.799468 |

@mg32-isomer24 bp86/6-31G(d) Etot=-6403.126744 Eb=-17.58

|      |           |           |           |
|------|-----------|-----------|-----------|
| Mg1  | -3.294176 | 3.540431  | 0.244274  |
| Mg2  | -4.308295 | 0.308096  | 0.774784  |
| Mg3  | 3.226248  | -3.005327 | -0.382746 |
| Mg4  | -2.856721 | -2.415806 | 1.280639  |
| Mg5  | 4.778646  | 2.585051  | 0.811440  |
| Mg6  | 1.048845  | -3.665921 | -2.305131 |
| Mg7  | 1.796477  | 0.763920  | -0.106600 |
| Mg8  | 0.569071  | 0.440266  | 2.741862  |
| Mg9  | -1.600980 | -4.256648 | -0.946348 |
| Mg10 | 4.615760  | -0.400627 | 0.272911  |
| Mg11 | -1.210066 | 2.922857  | 2.502590  |
| Mg12 | -2.066696 | 3.465803  | -2.548992 |
| Mg13 | 2.647643  | 3.824884  | -0.889290 |
| Mg14 | 4.251588  | 1.661092  | -2.081660 |
| Mg15 | -1.297455 | 0.971547  | -0.097135 |
| Mg16 | -2.958002 | -1.298383 | -1.458522 |
| Mg17 | -1.569074 | -2.800824 | -3.642841 |
| Mg18 | -2.318621 | -0.005985 | 3.057302  |
| Mg19 | -0.424701 | -2.479519 | 3.205603  |
| Mg20 | 0.720152  | 2.260572  | -2.709123 |
| Mg21 | -4.195693 | 2.462829  | 2.866438  |
| Mg22 | -0.220745 | 3.901146  | -0.169918 |
| Mg23 | 3.151314  | -1.085349 | -2.623030 |
| Mg24 | 0.251095  | -0.679337 | -2.506725 |
| Mg25 | -1.543343 | -5.050773 | 2.030670  |
| Mg26 | -4.296201 | 1.605679  | -1.913815 |
| Mg27 | 0.017530  | -1.715463 | 0.256518  |
| Mg28 | 3.673155  | 0.877783  | 2.909206  |
| Mg29 | 2.482433  | -1.914675 | 2.259033  |
| Mg30 | 1.059616  | -4.600217 | 0.843025  |
| Mg31 | -2.028645 | 0.594641  | -3.672809 |
| Mg32 | 1.899841  | 3.188257  | 1.998391  |

@mg32-isomer25 bp86/6-31G(d) Etot=-6403.125758 Eb=-17.56

|      |           |           |           |
|------|-----------|-----------|-----------|
| Mg1  | -0.463786 | 1.583546  | -0.011693 |
| Mg2  | 0.864377  | 3.159927  | -2.544974 |
| Mg3  | -1.966609 | 5.255562  | 1.388661  |
| Mg4  | -2.804949 | -3.406260 | -1.635028 |
| Mg5  | -2.561576 | 0.302632  | 2.157168  |
| Mg6  | -2.107728 | -1.143844 | -3.602118 |
| Mg7  | -0.246260 | -4.395247 | 0.197835  |
| Mg8  | 3.118011  | 1.230928  | -3.262796 |
| Mg9  | 3.085774  | 2.447770  | -0.500448 |
| Mg10 | 4.436448  | -2.119216 | 1.468007  |
| Mg11 | -1.553898 | -2.740721 | 2.758518  |
| Mg12 | 2.418188  | -3.049247 | -0.697844 |
| Mg13 | 4.805106  | 0.921856  | 1.545402  |
| Mg14 | 0.811633  | 4.344287  | 0.536104  |
| Mg15 | 0.189950  | -0.087363 | 3.052010  |
| Mg16 | 1.503318  | -2.792988 | 2.260644  |
| Mg17 | 0.459444  | 0.020156  | -2.534578 |
| Mg18 | -1.554777 | 4.611022  | -1.560128 |
| Mg19 | 2.708183  | -1.787253 | -3.390356 |
| Mg20 | -1.991494 | 1.945184  | -2.977694 |
| Mg21 | 1.885773  | -0.228422 | 0.385774  |
| Mg22 | -0.828445 | -1.432635 | 0.016598  |
| Mg23 | 3.121832  | -0.481621 | 3.536705  |
| Mg24 | -3.405155 | -0.030250 | -1.184579 |



|      |           |           |           |
|------|-----------|-----------|-----------|
| Mg25 | 4.490025  | -0.558058 | -1.204606 |
| Mg26 | -3.283857 | 2.790084  | 0.173970  |
| Mg27 | -4.013796 | -2.131709 | 0.911449  |
| Mg28 | -0.939111 | 2.876917  | 2.825888  |
| Mg29 | 0.041562  | -3.148354 | -2.704447 |
| Mg30 | 2.132715  | 2.244230  | 2.440926  |
| Mg31 | -3.021774 | -4.879871 | 1.105021  |
| Mg32 | -5.329124 | 0.678958  | 1.050609  |

@mg32-isomer26 bp86/6-31G(d) Etot=-6403.119814 Eb=-17.44

|      |           |           |           |
|------|-----------|-----------|-----------|
| Mg1  | -1.629400 | 0.874752  | 0.275851  |
| Mg2  | 3.156493  | 2.710513  | -2.613076 |
| Mg3  | 0.038473  | -0.679179 | -1.618276 |
| Mg4  | 0.390209  | 3.129948  | -1.570889 |
| Mg5  | -0.925068 | -3.844805 | 3.147722  |
| Mg6  | -1.887166 | 1.523013  | -2.933978 |
| Mg7  | 0.052032  | -1.591118 | 1.270996  |
| Mg8  | -1.126516 | -3.560660 | -2.004775 |
| Mg9  | 1.649203  | 0.916578  | 0.358100  |
| Mg10 | 3.174706  | -0.567691 | -2.278251 |
| Mg11 | -0.179744 | -4.909960 | 0.543822  |
| Mg12 | 2.360619  | -0.641707 | 3.191643  |
| Mg13 | -2.701851 | -3.056659 | 0.632117  |
| Mg14 | 2.098553  | -3.662187 | 2.072241  |
| Mg15 | 2.167781  | 2.583775  | 3.248205  |
| Mg16 | 4.542498  | 1.311126  | 2.241647  |
| Mg17 | -0.227575 | 0.832956  | 3.281991  |
| Mg18 | -1.457453 | -1.352068 | -4.247140 |
| Mg19 | 1.935831  | -3.235200 | -0.981987 |
| Mg20 | 1.010581  | 1.060462  | -3.836672 |
| Mg21 | -2.504928 | -1.211049 | 3.039689  |
| Mg22 | -4.503738 | 1.554175  | -1.539866 |
| Mg23 | 4.809117  | 1.358952  | -0.644377 |
| Mg24 | -2.505812 | 3.699857  | -0.638989 |
| Mg25 | 3.780737  | -1.362346 | 0.641194  |
| Mg26 | 2.944644  | 3.621783  | 0.360217  |
| Mg27 | -4.459440 | -0.219726 | 0.970249  |
| Mg28 | 1.288562  | -2.447146 | -3.850451 |
| Mg29 | -3.200171 | -1.199112 | -1.744129 |
| Mg30 | -2.936537 | 1.997872  | 2.808051  |
| Mg31 | -0.164354 | 3.402305  | 1.412350  |
| Mg32 | -4.990288 | 2.962546  | 1.006771  |

@mg32-isomer27 bp86/6-31G(d) Etot=-6403.118235 Eb=-17.41

|      |           |           |           |
|------|-----------|-----------|-----------|
| Mg1  | 1.635403  | -0.743567 | -0.006231 |
| Mg2  | -2.962641 | -1.031373 | -3.714278 |
| Mg3  | -0.016413 | 1.637996  | -0.728404 |
| Mg4  | -0.245007 | -1.944931 | -2.810842 |
| Mg5  | 1.098227  | 1.807359  | 4.478233  |
| Mg6  | 1.996161  | 0.091447  | -3.188752 |
| Mg7  | -0.215718 | 0.491823  | 2.145808  |
| Mg8  | 1.260931  | 4.432092  | -0.279396 |
| Mg9  | -1.604927 | -0.974835 | -0.132334 |
| Mg10 | -3.068000 | 1.630619  | -1.783075 |
| Mg11 | 0.015535  | 3.744409  | 2.340764  |
| Mg12 | -2.595354 | -1.179691 | 3.118085  |
| Mg13 | 2.587670  | 2.254367  | 1.811609  |
| Mg14 | -2.366563 | 2.101341  | 3.385619  |
| Mg15 | -2.245671 | -3.950352 | 1.592736  |
| Mg16 | -4.562527 | -2.322733 | 1.112535  |
| Mg17 | 0.122721  | -2.480277 | 2.591892  |
| Mg18 | 1.390665  | 3.197156  | -3.096765 |
| Mg19 | -2.349216 | 3.475588  | 0.589633  |
| Mg20 | -0.809060 | 1.020693  | -3.678689 |

|      |           |           |           |
|------|-----------|-----------|-----------|
| Mg21 | 2.520492  | -0.595608 | 3.214191  |
| Mg22 | 4.610182  | -0.578944 | -1.965669 |
| Mg23 | -4.730798 | -0.873156 | -1.428424 |
| Mg24 | 2.612850  | -2.892168 | -1.923655 |
| Mg25 | -3.840117 | 0.757453  | 1.072523  |
| Mg26 | -2.887399 | -3.322098 | -1.463457 |
| Mg27 | 4.508158  | -0.168516 | 1.017334  |
| Mg28 | -1.226216 | 4.255368  | -2.107028 |
| Mg29 | 3.250461  | 1.997344  | -1.044992 |
| Mg30 | 2.800282  | -3.240319 | 1.374551  |
| Mg31 | 0.115710  | -3.672709 | -0.271827 |
| Mg32 | 5.200180  | -2.923780 | -0.221696 |

@mg32-isomer28 bp86/6-31G(d) Etot=-6403.105166 Eb=-17.16

|      |           |           |           |
|------|-----------|-----------|-----------|
| Mg1  | -4.094930 | 1.396795  | 3.211990  |
| Mg2  | 4.836156  | -1.404281 | 0.087702  |
| Mg3  | -2.907417 | 3.739435  | 1.563364  |
| Mg4  | -2.369223 | -4.414218 | -2.471990 |
| Mg5  | 0.689603  | -0.080644 | -2.876224 |
| Mg6  | 2.192528  | 0.312556  | -0.130403 |
| Mg7  | -1.118756 | 4.450188  | -1.307816 |
| Mg8  | -0.624941 | -4.661114 | -0.104785 |
| Mg9  | -3.091327 | 0.455731  | 0.560385  |
| Mg10 | 3.309205  | -2.383690 | 2.648716  |
| Mg11 | 0.348301  | -3.355522 | 2.525366  |
| Mg12 | -1.930642 | -1.423353 | -2.811217 |
| Mg13 | 0.836339  | 2.952885  | -3.103772 |
| Mg14 | 2.133547  | -3.028397 | -0.002761 |
| Mg15 | -4.373505 | -0.000153 | -2.038415 |
| Mg16 | -3.710362 | 2.935481  | -1.133804 |
| Mg17 | 0.938682  | -0.387288 | 2.675489  |
| Mg18 | 0.545091  | -3.209472 | -2.606984 |
| Mg19 | -3.308225 | -2.576785 | -0.183102 |
| Mg20 | -0.477067 | 1.626606  | -0.068485 |
| Mg21 | 5.001456  | 1.744297  | -0.153546 |
| Mg22 | 4.246111  | 0.513162  | 2.474089  |
| Mg23 | -1.033402 | 1.815853  | 3.036511  |
| Mg24 | -2.505762 | -4.223511 | 2.226837  |
| Mg25 | 3.237479  | -1.619609 | -2.455248 |
| Mg26 | 1.932154  | 2.383386  | 2.329410  |
| Mg27 | -1.859262 | 1.619457  | -3.064510 |
| Mg28 | 2.125534  | 3.433292  | -0.470934 |
| Mg29 | -0.431497 | -1.363164 | 0.008123  |
| Mg30 | 3.557898  | 1.488215  | -2.749611 |
| Mg31 | -0.056113 | 4.458885  | 1.526044  |
| Mg32 | -2.037653 | -1.195023 | 2.859582  |

@mg32-isomer29 bp86/6-31G(d) Etot=-6403.102406 Eb=-17.10

|      |           |           |           |
|------|-----------|-----------|-----------|
| Mg1  | -2.369773 | 0.215015  | 0.067726  |
| Mg2  | 0.362687  | -1.694960 | -2.556937 |
| Mg3  | -1.011647 | -2.715021 | 0.417712  |
| Mg4  | 0.064364  | 2.599322  | 0.631026  |
| Mg5  | -3.023982 | -1.579326 | 2.533926  |
| Mg6  | 1.642956  | 1.110640  | 3.043699  |
| Mg7  | 0.043141  | -1.577780 | 3.085535  |
| Mg8  | 2.647263  | 0.388396  | -2.301621 |
| Mg9  | 0.927360  | -0.352057 | 0.282016  |
| Mg10 | 3.052017  | -1.677789 | 3.469906  |
| Mg11 | -3.944569 | -2.643066 | -0.310706 |
| Mg12 | 3.284046  | -2.569447 | -1.810987 |
| Mg13 | -3.549705 | 2.161163  | -2.175231 |
| Mg14 | -5.345632 | -0.341162 | -1.650938 |
| Mg15 | -0.447199 | 1.267825  | -2.289731 |
| Mg16 | -4.294853 | 1.268498  | 2.732245  |

|      |           |           |           |
|------|-----------|-----------|-----------|
| Mg17 | 1.059133  | -4.449001 | -1.403185 |
| Mg18 | 3.160006  | 2.173491  | 0.594095  |
| Mg19 | 4.684826  | 0.962285  | 2.977826  |
| Mg20 | -5.585696 | 1.979625  | 0.184555  |
| Mg21 | -2.632446 | -0.825415 | -2.847913 |
| Mg22 | -5.789389 | -0.872079 | 1.252153  |
| Mg23 | 4.022732  | -0.929539 | 0.625449  |
| Mg24 | -1.336900 | 1.155130  | 2.917110  |
| Mg25 | -2.909320 | 3.231219  | 0.782400  |
| Mg26 | 4.838665  | 2.502310  | -1.920739 |
| Mg27 | 1.817709  | 3.329764  | -1.884388 |
| Mg28 | -1.383941 | 4.128578  | -1.727279 |
| Mg29 | 2.068742  | -3.281000 | 1.145291  |
| Mg30 | 6.258723  | 1.250906  | 0.430682  |
| Mg31 | -1.967860 | -3.697542 | -2.332268 |
| Mg32 | 5.658542  | -0.518983 | -1.961431 |

@mg32-isomer30 bp86/6-31G(d) Etot=-6403.079481 Eb=-16.65

|      |           |           |           |
|------|-----------|-----------|-----------|
| Mg1  | -1.114337 | 1.927544  | -0.012086 |
| Mg2  | 2.080154  | 2.153385  | 2.027663  |
| Mg3  | -4.997437 | 1.340319  | 0.206082  |
| Mg4  | -0.672761 | 0.876528  | 3.100580  |
| Mg5  | 0.605428  | -0.323232 | 0.309828  |
| Mg6  | -3.311622 | 3.808184  | -0.597425 |
| Mg7  | -5.405338 | -0.751634 | -1.998258 |
| Mg8  | -2.891385 | -1.719409 | -3.315290 |
| Mg9  | -3.114632 | 2.550515  | 2.239501  |
| Mg10 | -2.571764 | -0.632887 | -0.112869 |
| Mg11 | -5.567921 | -1.535016 | 0.906616  |
| Mg12 | 1.800115  | -3.141417 | 0.931043  |
| Mg13 | -0.324967 | 3.838396  | 2.235829  |
| Mg14 | -0.735603 | -2.042099 | 2.421954  |
| Mg15 | -3.296298 | -3.329141 | 1.572061  |
| Mg16 | 3.682619  | 0.032397  | 0.444567  |
| Mg17 | -0.490014 | 2.833249  | -2.804386 |
| Mg18 | 2.156624  | 1.353212  | -1.959870 |
| Mg19 | 6.468196  | 1.501646  | -0.910058 |
| Mg20 | 4.396378  | -3.247278 | -0.678877 |
| Mg21 | 4.525939  | -2.322576 | 2.159290  |
| Mg22 | -4.132911 | -3.363611 | -1.221634 |
| Mg23 | -3.488053 | -0.393474 | 2.833307  |
| Mg24 | 2.011582  | -0.735934 | 3.080865  |
| Mg25 | -0.457103 | -0.218845 | -2.620871 |
| Mg26 | 6.601761  | -1.376548 | 0.029839  |
| Mg27 | 4.156177  | 3.108687  | -0.234504 |
| Mg28 | -0.872218 | -2.958882 | -0.767791 |
| Mg29 | 2.007682  | -1.866073 | -1.940356 |
| Mg30 | -3.156611 | 1.376873  | -2.499772 |
| Mg31 | 1.298842  | 3.853650  | -0.435798 |
| Mg32 | 4.809481  | -0.596529 | -2.389177 |

@mg32-isomer31 bp86/6-31G(d) Etot=-6403.077442 Eb=-16.61

|      |           |           |           |
|------|-----------|-----------|-----------|
| Mg1  | 1.413972  | 2.355359  | 1.441753  |
| Mg2  | -0.736399 | 0.193070  | 0.006066  |
| Mg3  | 1.139922  | 2.188051  | -1.742578 |
| Mg4  | 0.308731  | -2.493928 | 1.628250  |
| Mg5  | 0.867517  | -0.342723 | -3.329628 |
| Mg6  | -2.832257 | 2.567516  | -0.078232 |
| Mg7  | -4.201219 | 1.041331  | 2.156604  |
| Mg8  | 2.264506  | -0.371410 | -0.015518 |
| Mg9  | -1.751048 | 1.472175  | -2.773425 |
| Mg10 | -2.336915 | -2.545623 | 0.004341  |
| Mg11 | -6.764635 | 0.350064  | 0.940270  |
| Mg12 | -0.822726 | 4.503258  | 1.100185  |

|      |           |           |           |
|------|-----------|-----------|-----------|
| Mg13 | 0.480108  | -2.647791 | -1.371134 |
| Mg14 | 3.311027  | -2.024475 | -2.511200 |
| Mg15 | 0.854930  | 0.026722  | 3.249669  |
| Mg16 | -2.075367 | -0.985765 | 2.801064  |
| Mg17 | 2.869467  | -2.211338 | 3.264282  |
| Mg18 | -4.470854 | -3.016028 | -2.148659 |
| Mg19 | 3.935267  | 0.770548  | 2.331440  |
| Mg20 | 5.387882  | 0.113662  | -0.437969 |
| Mg21 | 5.377175  | -1.852973 | 1.863773  |
| Mg22 | 3.973270  | 2.704594  | -0.292800 |
| Mg23 | 5.619695  | -2.876713 | -0.918817 |
| Mg24 | -4.920290 | -1.924077 | 1.594691  |
| Mg25 | 1.829972  | 4.792435  | -0.364929 |
| Mg26 | -1.439950 | 2.052459  | 2.746422  |
| Mg27 | -1.088751 | 4.306348  | -1.931587 |
| Mg28 | -6.866055 | -2.030703 | -0.857998 |
| Mg29 | 3.648058  | 0.961892  | -2.825431 |
| Mg30 | -1.922510 | -1.533348 | -2.921805 |
| Mg31 | -4.005568 | -0.078910 | -1.022325 |
| Mg32 | 2.953045  | -3.463679 | 0.415225  |

@mg32-isomer32 bp86/6-31G(d) Etot=-6403.075753 Eb=-16.58

|      |           |           |           |
|------|-----------|-----------|-----------|
| Mg1  | -1.682080 | -0.685992 | -0.031707 |
| Mg2  | 0.237044  | -3.662174 | -0.216617 |
| Mg3  | -1.848815 | 3.988670  | 2.073010  |
| Mg4  | 2.795399  | 2.631254  | 0.910654  |
| Mg5  | -2.638490 | 1.239160  | 2.403015  |
| Mg6  | 0.473517  | 1.883022  | 2.935157  |
| Mg7  | -3.240687 | -0.943139 | -3.076733 |
| Mg8  | 2.574346  | 1.640508  | -1.885101 |
| Mg9  | -3.070199 | 2.309348  | -0.386260 |
| Mg10 | 3.665309  | 1.692610  | 3.578949  |
| Mg11 | 1.344204  | -0.660346 | -0.092879 |
| Mg12 | -1.442954 | 4.846369  | -0.865089 |
| Mg13 | -3.990698 | 1.868408  | -3.193148 |
| Mg14 | -2.015222 | -3.644481 | 1.813432  |
| Mg15 | 2.502600  | -2.835197 | -2.166812 |
| Mg16 | -4.573531 | -0.376628 | -0.270784 |
| Mg17 | 2.399707  | -0.822443 | 2.867453  |
| Mg18 | 3.172443  | -3.109375 | 0.945337  |
| Mg19 | -0.068530 | 2.024768  | -0.114660 |
| Mg20 | 0.798105  | 4.964377  | 1.357331  |
| Mg21 | 5.297260  | -2.567032 | -0.963123 |
| Mg22 | 0.990507  | -3.640856 | 2.827847  |
| Mg23 | 1.658101  | -0.285210 | -3.986310 |
| Mg24 | -2.776531 | -3.349559 | -1.230635 |
| Mg25 | -0.926955 | 1.179760  | -2.815721 |
| Mg26 | 4.346525  | -0.547464 | -2.847013 |
| Mg27 | -3.739867 | -1.429923 | 2.716533  |
| Mg28 | 4.248850  | 0.025672  | 0.411191  |
| Mg29 | -0.396724 | -1.880160 | -2.626529 |
| Mg30 | -0.593023 | -1.028725 | 2.780152  |
| Mg31 | 1.388500  | 4.441514  | -1.603924 |
| Mg32 | -4.888111 | -3.266734 | 0.752982  |

@mg32-isomer33 bp86/6-31G(d) Etot=-6403.054873 Eb=-16.17

|     |           |          |           |
|-----|-----------|----------|-----------|
| Mg1 | -0.350213 | 2.168401 | -1.535973 |
| Mg2 | -0.941602 | 2.353893 | 2.436661  |
| Mg3 | 1.792438  | 2.851650 | 1.263367  |
| Mg4 | -3.364635 | 3.863771 | 1.423142  |
| Mg5 | 1.808117  | 4.224208 | -1.534969 |
| Mg6 | 4.033878  | 2.473229 | -0.689126 |
| Mg7 | -4.728653 | 1.778191 | -0.259018 |
| Mg8 | 2.251361  | 1.480494 | -3.003280 |

|      |           |           |           |
|------|-----------|-----------|-----------|
| Mg9  | 1.332326  | 0.370980  | 3.025746  |
| Mg10 | -2.901328 | 3.831352  | -1.616835 |
| Mg11 | 4.965642  | -0.030347 | -1.884848 |
| Mg12 | -2.960726 | 0.856426  | -2.466794 |
| Mg13 | -4.492569 | -1.217163 | -0.590948 |
| Mg14 | -1.569222 | 0.095173  | 0.341252  |
| Mg15 | 2.594027  | -1.559570 | -2.930429 |
| Mg16 | -0.261398 | -0.628475 | -2.735883 |
| Mg17 | 4.043863  | -2.492321 | -0.439711 |
| Mg18 | 1.731967  | 0.071337  | -0.228114 |
| Mg19 | 7.076711  | -1.603826 | -0.240157 |
| Mg20 | -0.223079 | -2.178206 | 2.078932  |
| Mg21 | 0.972935  | -2.826948 | -0.671463 |
| Mg22 | 5.870564  | -2.199401 | 2.385573  |
| Mg23 | -2.850916 | -2.092034 | -3.265723 |
| Mg24 | -4.555261 | -4.176564 | -2.079795 |
| Mg25 | -0.623954 | 4.631610  | 0.338588  |
| Mg26 | 2.790388  | -2.175551 | 2.230318  |
| Mg27 | -3.401613 | -1.945780 | 2.301198  |
| Mg28 | 4.194508  | 0.400152  | 1.509540  |
| Mg29 | -3.833341 | 1.080028  | 2.502657  |
| Mg30 | -1.997398 | -3.040970 | -0.385272 |
| Mg31 | -4.835383 | -4.154587 | 0.801085  |
| Mg32 | -1.567435 | -0.209151 | 3.920276  |

@mg32-isomer34 bp86/6-31G(d) Etot=-6403.038870 Eb=-15.86

|      |           |           |           |
|------|-----------|-----------|-----------|
| Mg1  | -0.163443 | 0.535643  | 0.294325  |
| Mg2  | -1.451570 | -0.069272 | -2.875451 |
| Mg3  | 0.299214  | 2.671802  | -2.130250 |
| Mg4  | -0.778372 | -2.999386 | 1.352927  |
| Mg5  | 2.794617  | 0.293823  | -0.554391 |
| Mg6  | 6.050668  | -0.828956 | -0.355021 |
| Mg7  | 0.707455  | -2.038147 | -1.295275 |
| Mg8  | 0.012881  | 3.661352  | 0.778592  |
| Mg9  | 1.940143  | 1.739674  | 2.214182  |
| Mg10 | -2.669630 | -1.015411 | -0.170081 |
| Mg11 | -5.503782 | -2.353373 | -0.006334 |
| Mg12 | -2.799482 | 4.244180  | 1.815384  |
| Mg13 | -3.384473 | -4.473226 | 0.208892  |
| Mg14 | 1.974098  | -4.134243 | 0.695430  |
| Mg15 | -3.121023 | 1.091658  | 1.859063  |
| Mg16 | 1.861465  | -1.329228 | 1.898526  |
| Mg17 | -2.614015 | 2.050576  | -1.005906 |
| Mg18 | 4.631361  | -2.732292 | 1.539168  |
| Mg19 | 4.598899  | 0.316723  | 1.994150  |
| Mg20 | -1.880837 | 5.009383  | -1.216786 |
| Mg21 | 3.357876  | 2.412444  | -2.773189 |
| Mg22 | -2.114668 | -3.096595 | -2.357048 |
| Mg23 | 5.529300  | 2.114796  | -0.429686 |
| Mg24 | -3.555685 | -2.277906 | 2.433625  |
| Mg25 | -4.457469 | -0.933893 | -2.561590 |
| Mg26 | -0.842212 | -0.591864 | 3.193368  |
| Mg27 | -0.634235 | -5.120309 | -0.837222 |
| Mg28 | -4.869166 | 4.300521  | -0.333181 |
| Mg29 | -0.865643 | 2.414957  | 3.348130  |
| Mg30 | 3.697336  | -2.542218 | -1.288803 |
| Mg31 | 2.835963  | 3.548469  | -0.106814 |
| Mg32 | 1.414427  | 0.130317  | -3.328734 |

@mg32-isomer35 bp86/6-31G(d) Etot=-6403.021653 Eb=-15.52

|     |           |           |           |
|-----|-----------|-----------|-----------|
| Mg1 | -0.183006 | -0.518616 | 0.077084  |
| Mg2 | 1.640386  | -0.922297 | -2.394516 |
| Mg3 | -2.501279 | -1.550105 | -1.826197 |
| Mg4 | 2.720600  | 0.871027  | 0.478919  |

|      |           |           |           |
|------|-----------|-----------|-----------|
| Mg5  | -2.022015 | 1.883987  | -0.663486 |
| Mg6  | -3.300483 | 5.135945  | -0.229330 |
| Mg7  | 1.063717  | 2.081312  | -1.674571 |
| Mg8  | -2.721818 | -2.470792 | 1.105421  |
| Mg9  | -2.401710 | 0.382091  | 2.095834  |
| Mg10 | 2.658048  | -2.252500 | 0.328350  |
| Mg11 | 5.864299  | -2.436456 | 0.593997  |
| Mg12 | -1.590520 | -5.345083 | 1.131605  |
| Mg13 | 5.853532  | 0.463962  | -0.138273 |
| Mg14 | 1.971367  | 4.234609  | 0.625235  |
| Mg15 | 0.295203  | -3.186653 | 1.940859  |
| Mg16 | -0.008402 | 2.188352  | 1.626964  |
| Mg17 | -0.027329 | -3.345135 | -1.072982 |
| Mg18 | -0.811315 | 5.202571  | 1.713565  |
| Mg19 | -3.129147 | 3.310937  | 2.066565  |
| Mg20 | -2.836530 | -4.546378 | -1.606425 |
| Mg21 | -4.027077 | 0.909580  | -2.722395 |
| Mg22 | 4.037349  | 1.041286  | -2.592828 |
| Mg23 | -5.129231 | 2.788681  | -0.439642 |
| Mg24 | 4.471502  | -0.554424 | 2.474443  |
| Mg25 | 4.545282  | -1.864843 | -2.018437 |
| Mg26 | 1.214300  | -0.337259 | 2.953358  |
| Mg27 | 4.512684  | 3.176672  | -0.615675 |
| Mg28 | -2.847097 | -7.538666 | -0.643490 |
| Mg29 | -1.354461 | -1.704396 | 3.897656  |
| Mg30 | -0.456624 | 4.563760  | -1.208794 |
| Mg31 | -4.547374 | -0.167112 | 0.037152  |
| Mg32 | -0.952854 | 0.505943  | -3.299968 |
